# Supplementary material
Source: publisher figshare collection journal article supplement (https://tandf.figshare.com/articles/dataset/_/7466618)
Supplement: Supplementary file 1 [file 1]

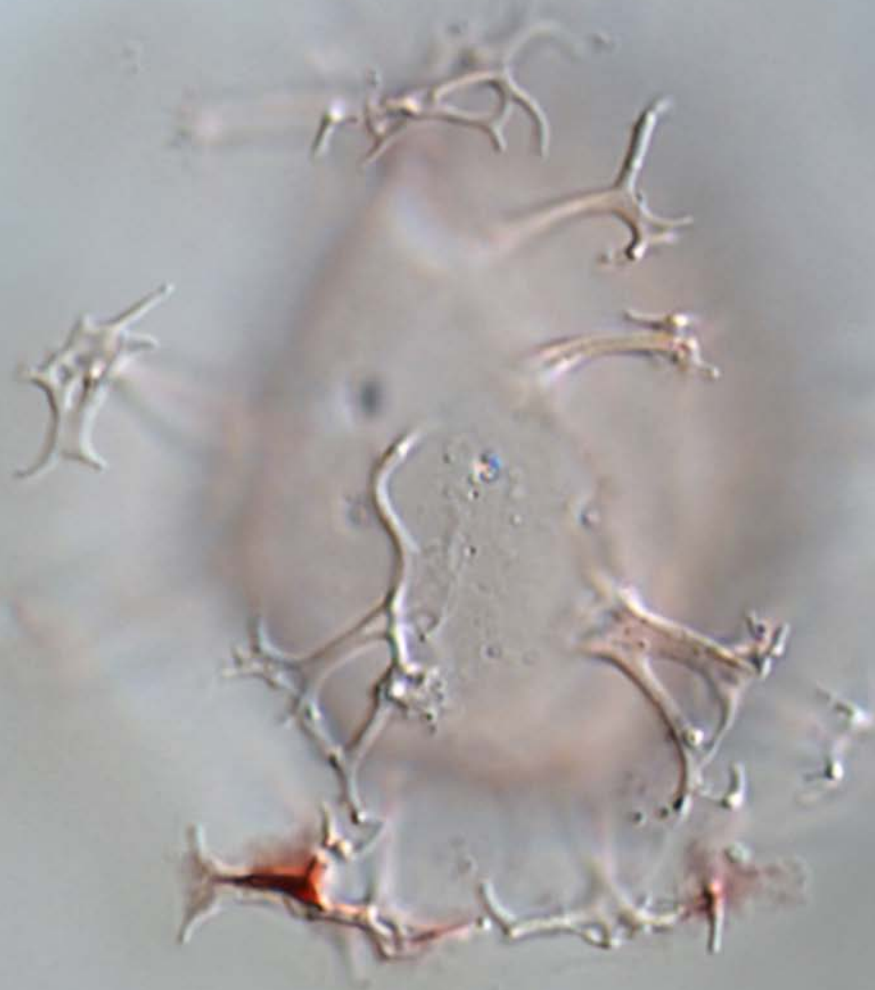

20  $\mu\text{m}$

*Spiniferites septentrionalis* Harland 1977  
holotype

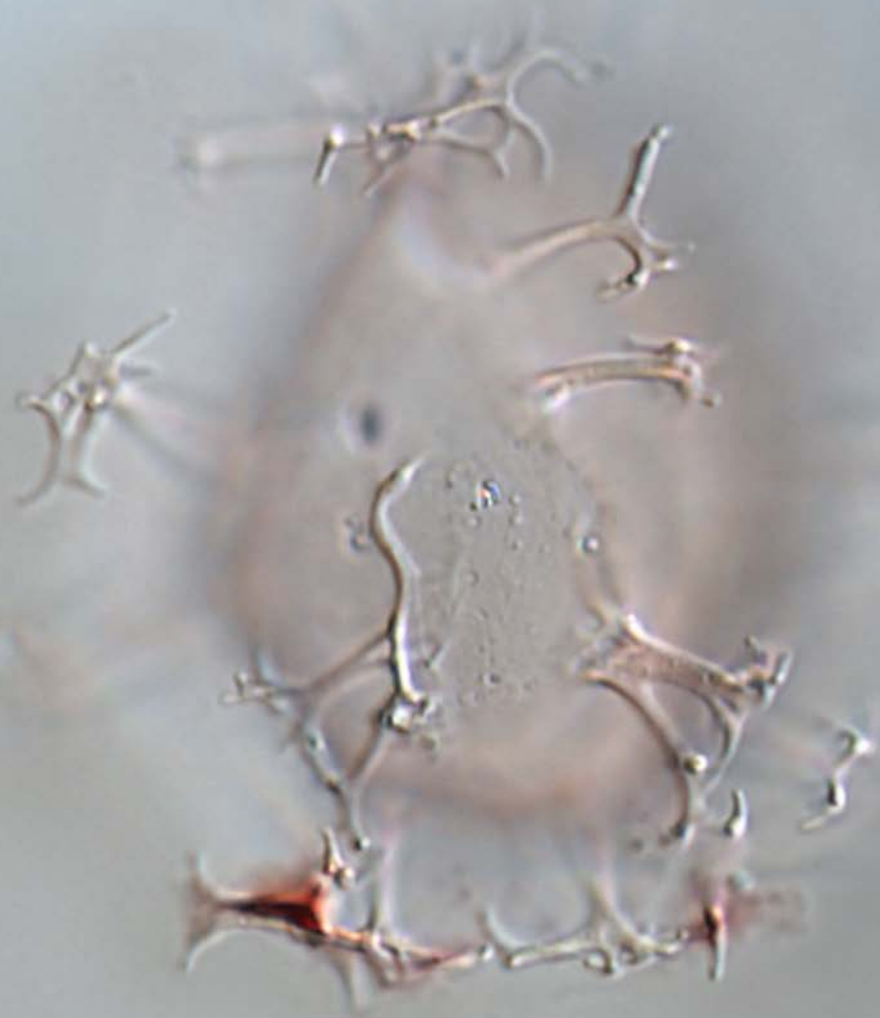

20  $\mu\text{m}$

*Spiniferites septentrionalis* Harland 1977  
holotype

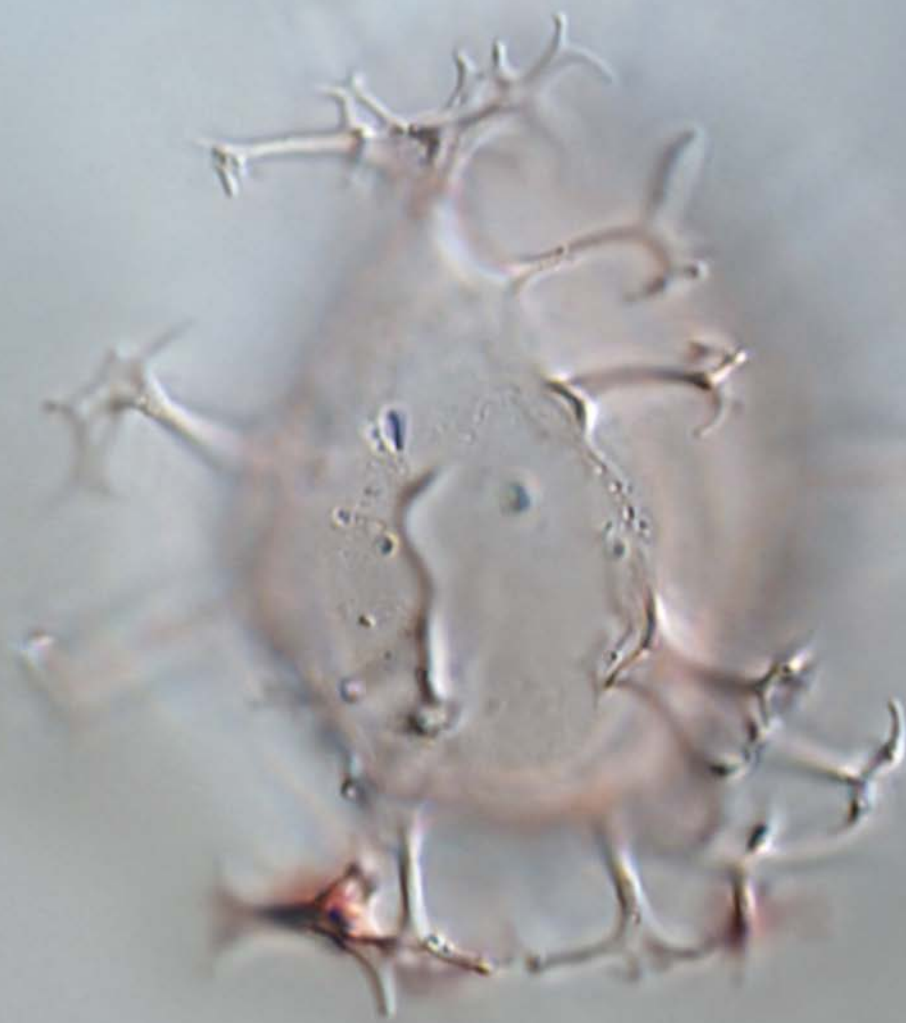

20  $\mu\text{m}$

*Spiniferites septentrionalis* Harland 1977  
holotype

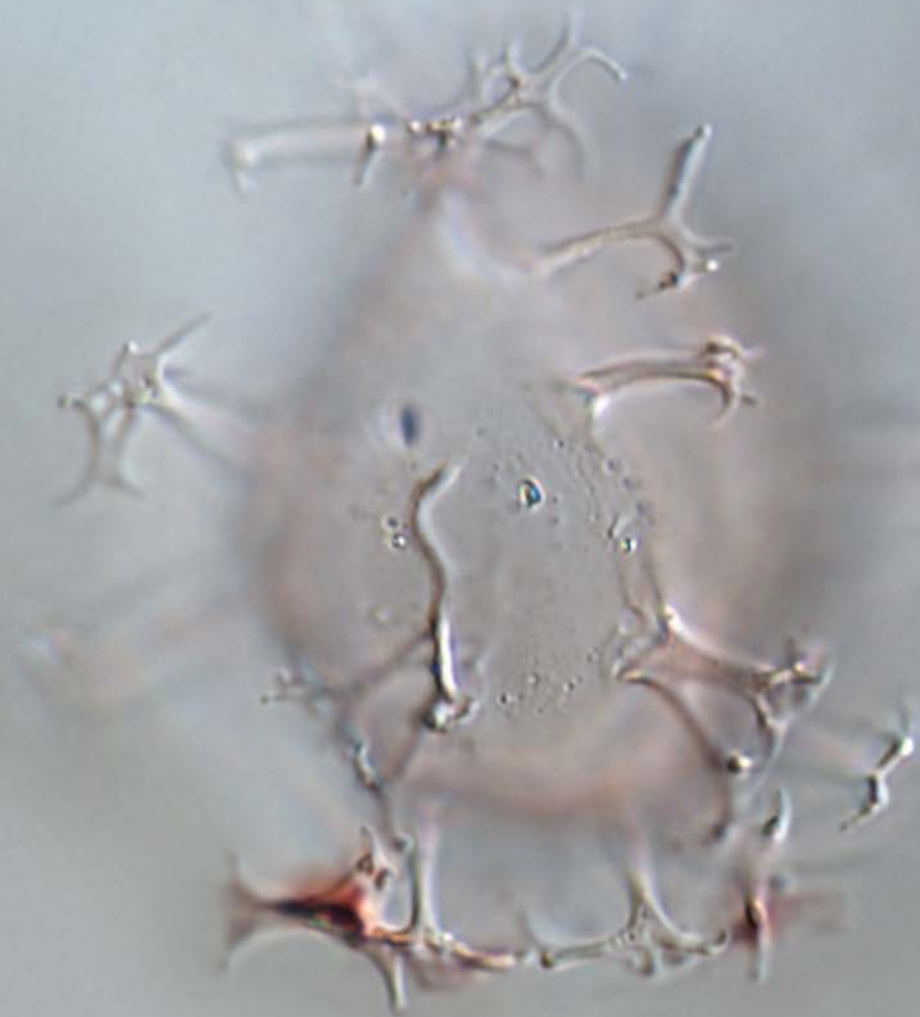

20  $\mu\text{m}$

*Spiniferites septentrionalis* Harland 1977  
holotype

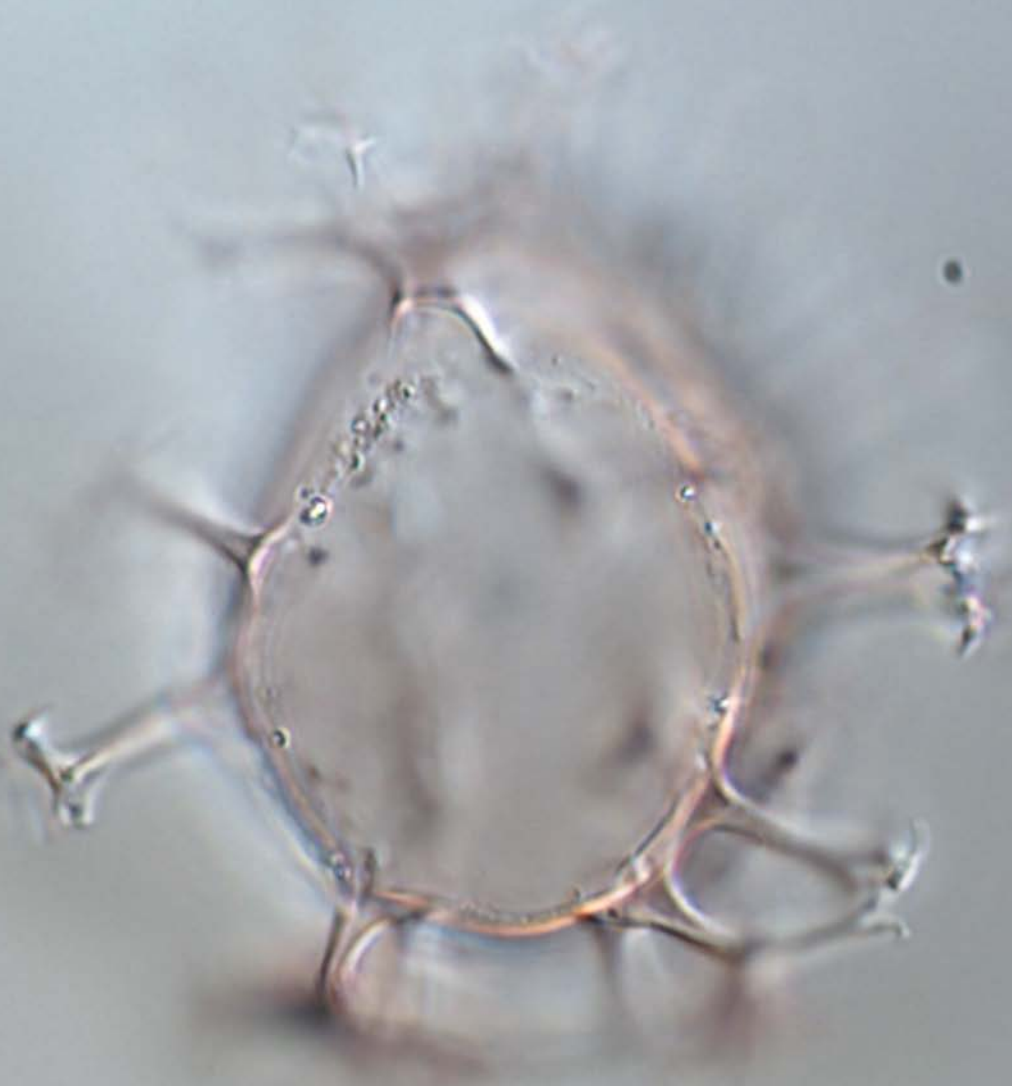

20  $\mu\text{m}$

*Spiniferites septentrionalis* Harland 1977  
holotype

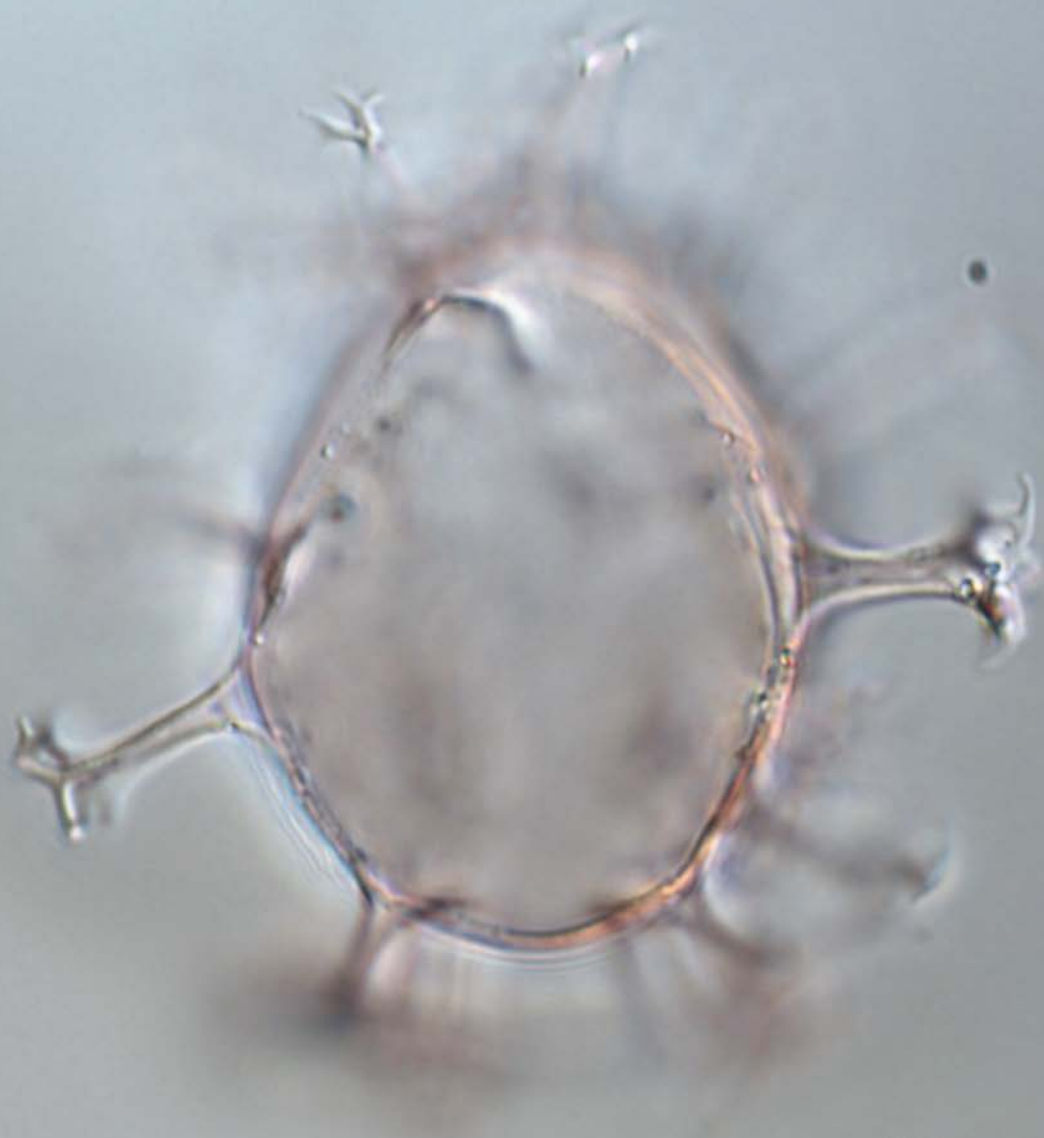

20  $\mu\text{m}$

*Spiniferites septentrionalis* Harland 1977  
holotype



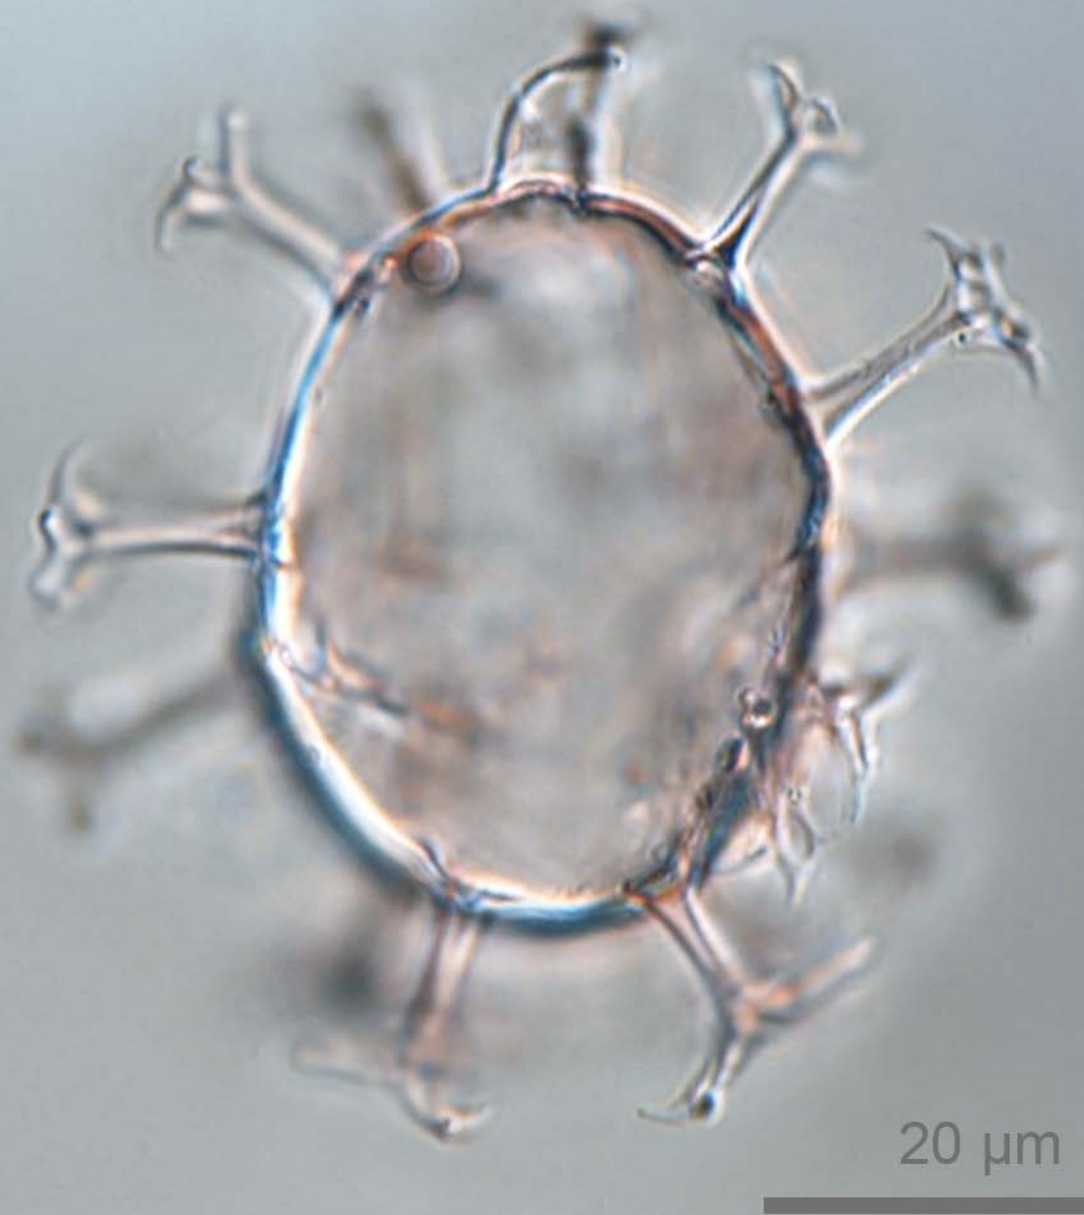

*Spiniferites septentrionalis* Harland 1977  
holotype

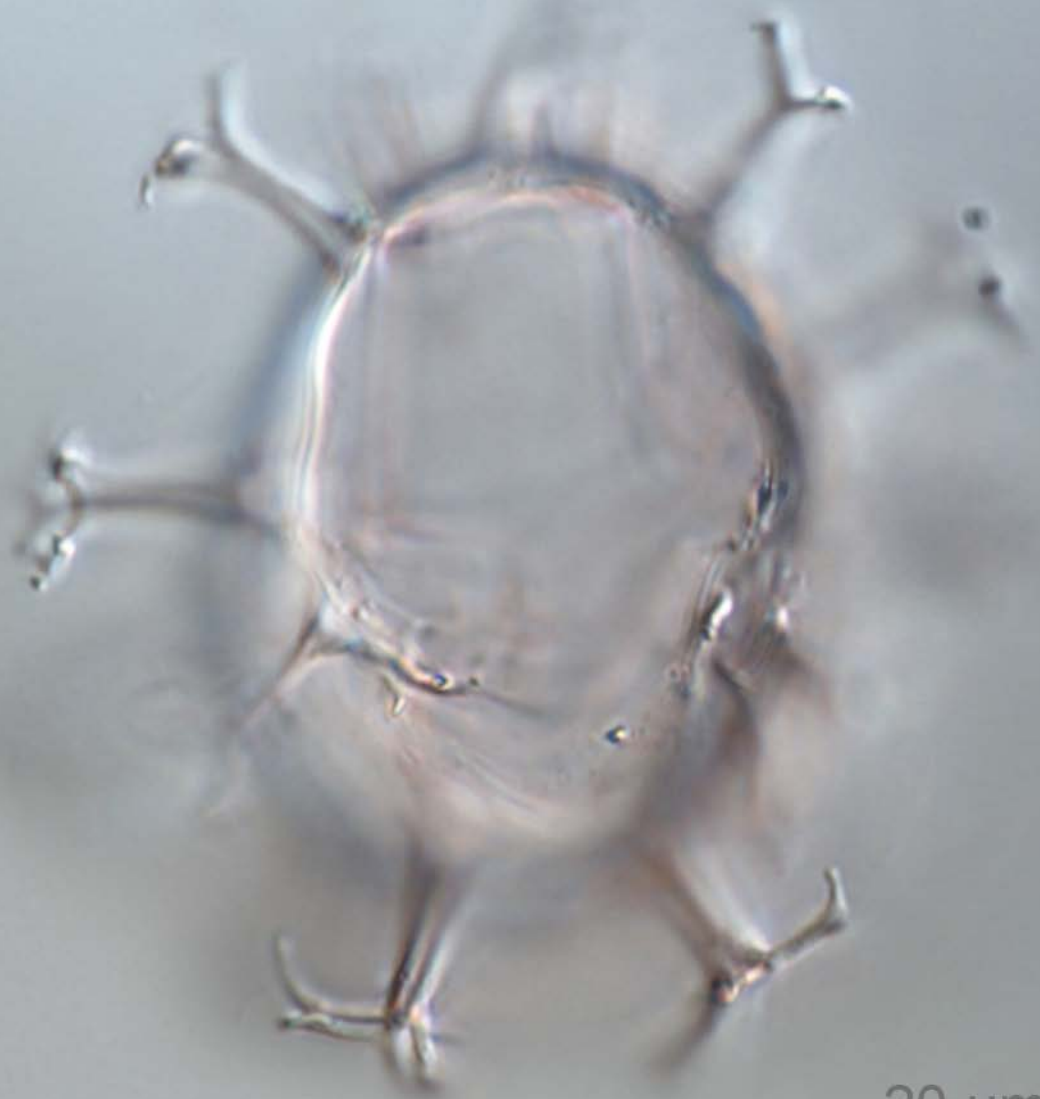

20  $\mu\text{m}$

*Spiniferites septentrionalis* Harland 1977  
holotype



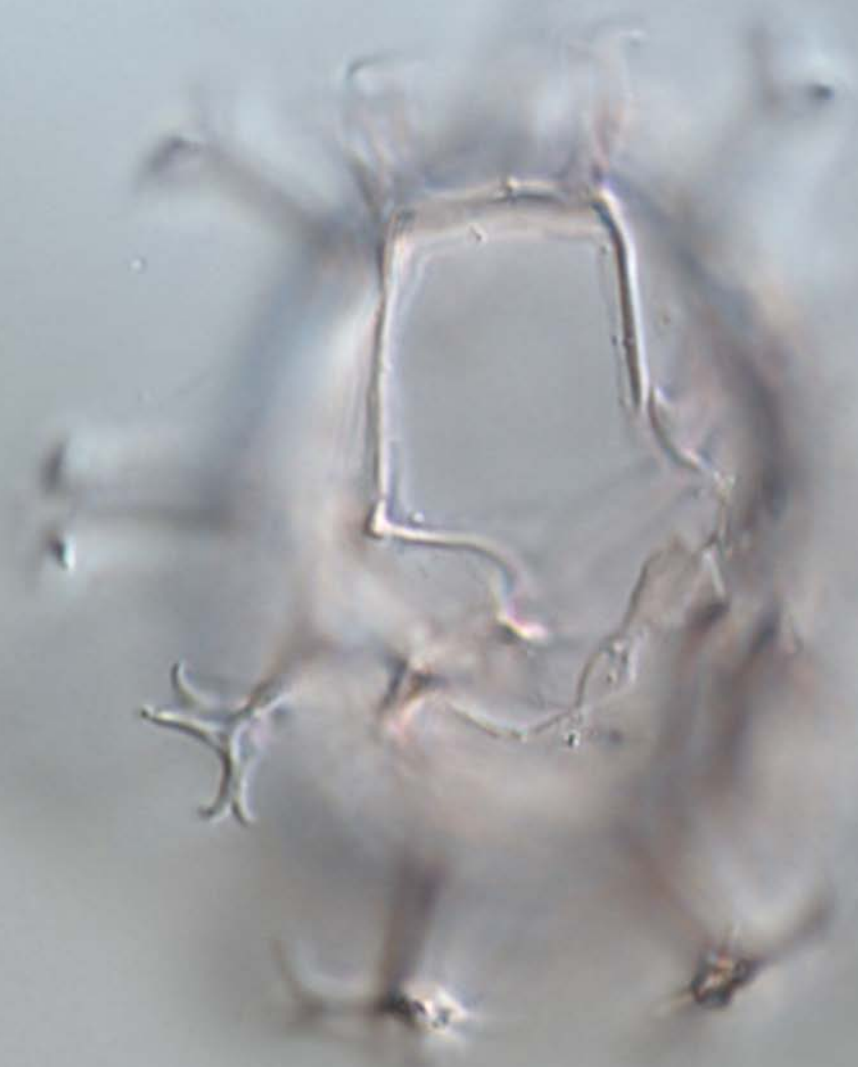

20  $\mu\text{m}$

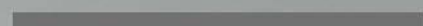

*Spiniferites septentrionalis* Harland 1977  
holotype

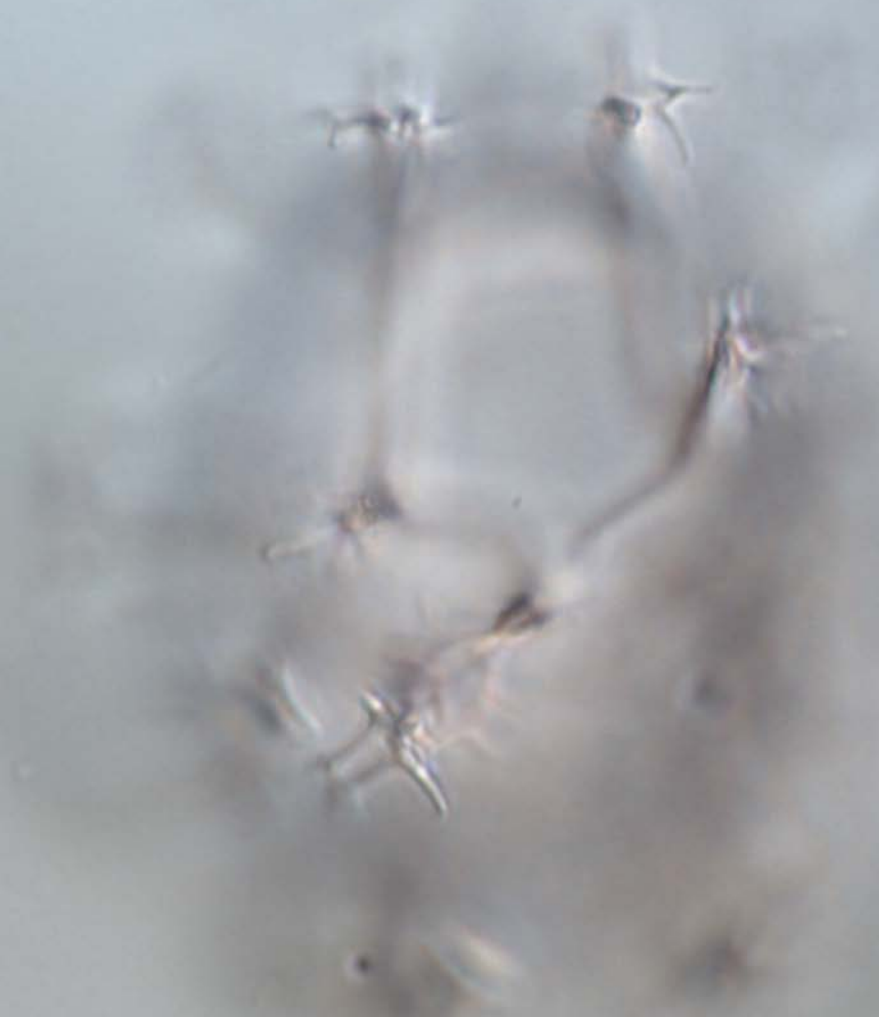

20  $\mu\text{m}$

*Spiniferites septentrionalis* Harland 1977  
holotype
