# Supplementary material
Source: publisher figshare collection journal article supplement (https://tandf.figshare.com/articles/dataset/_/7466618)
Supplement: Supplementary file 6 [file 1]

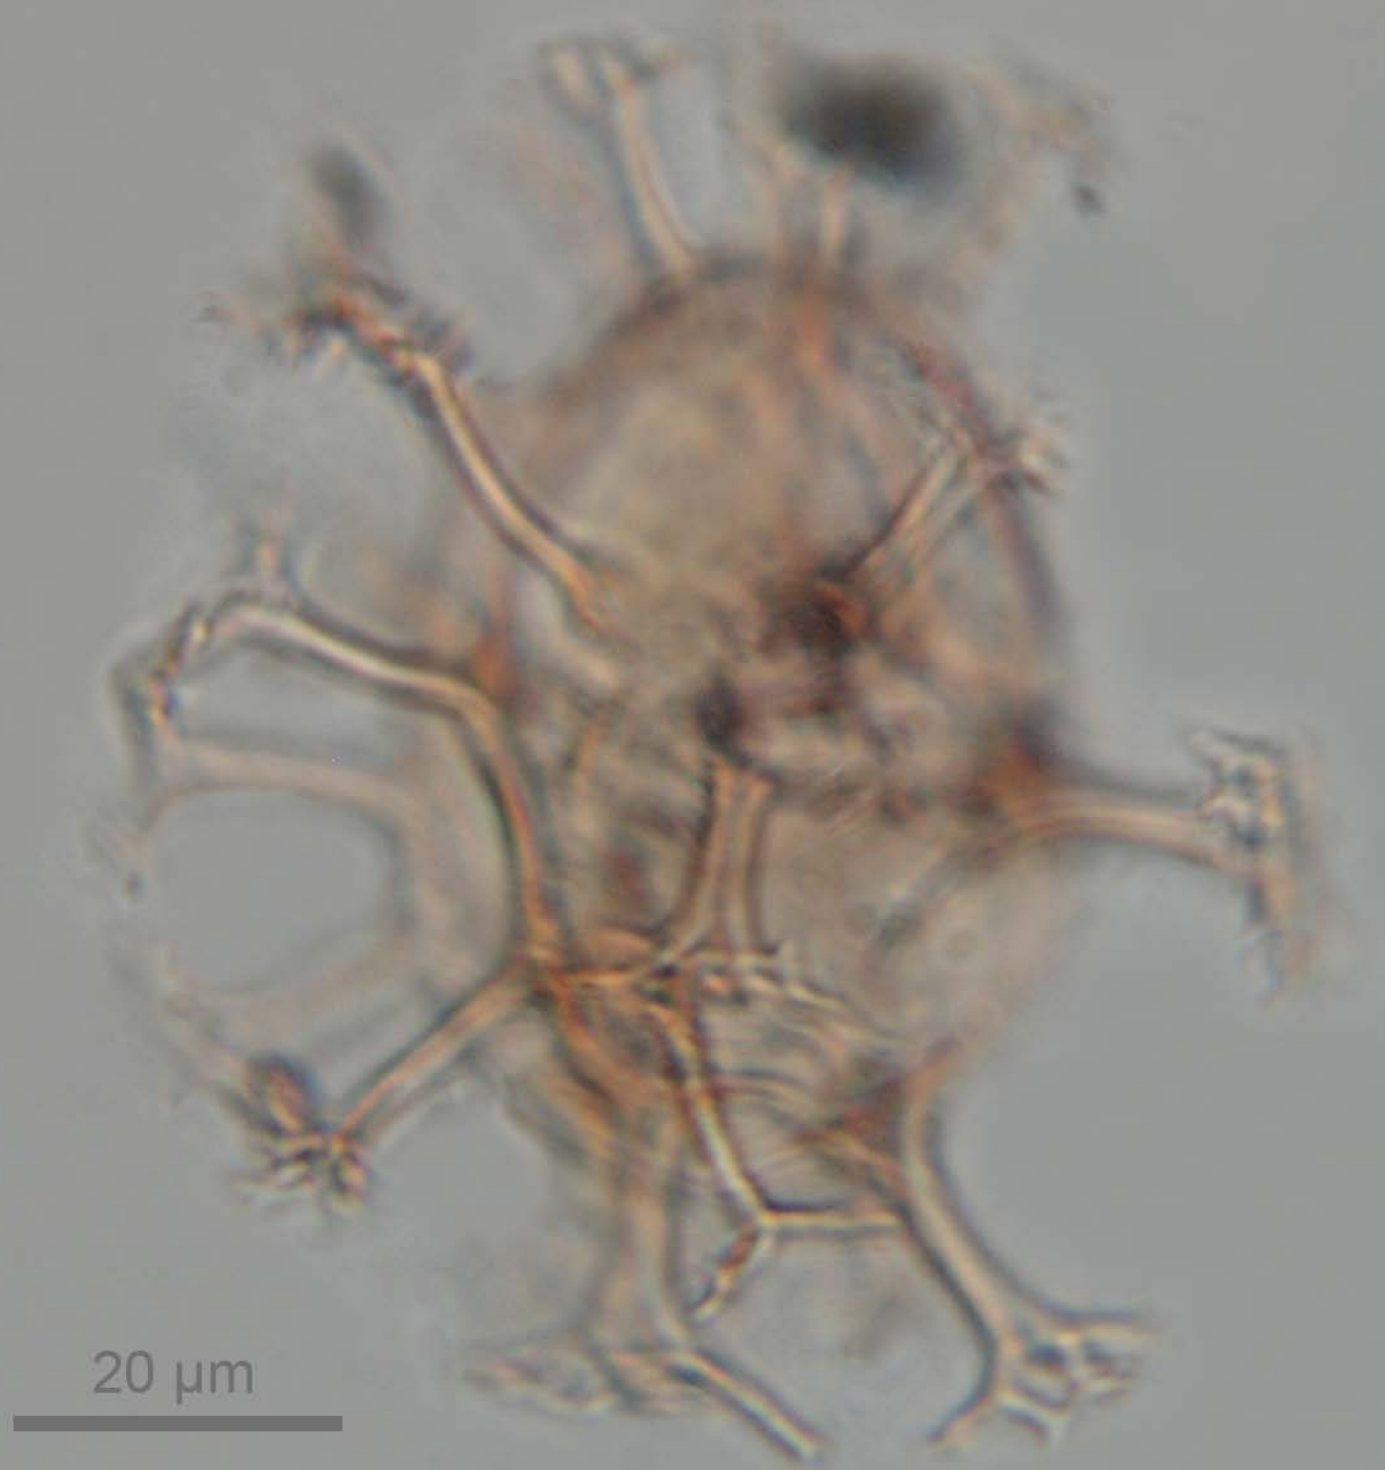

*Achomosphaera andalousiensis* Jan du Chêne 1977  
topotype

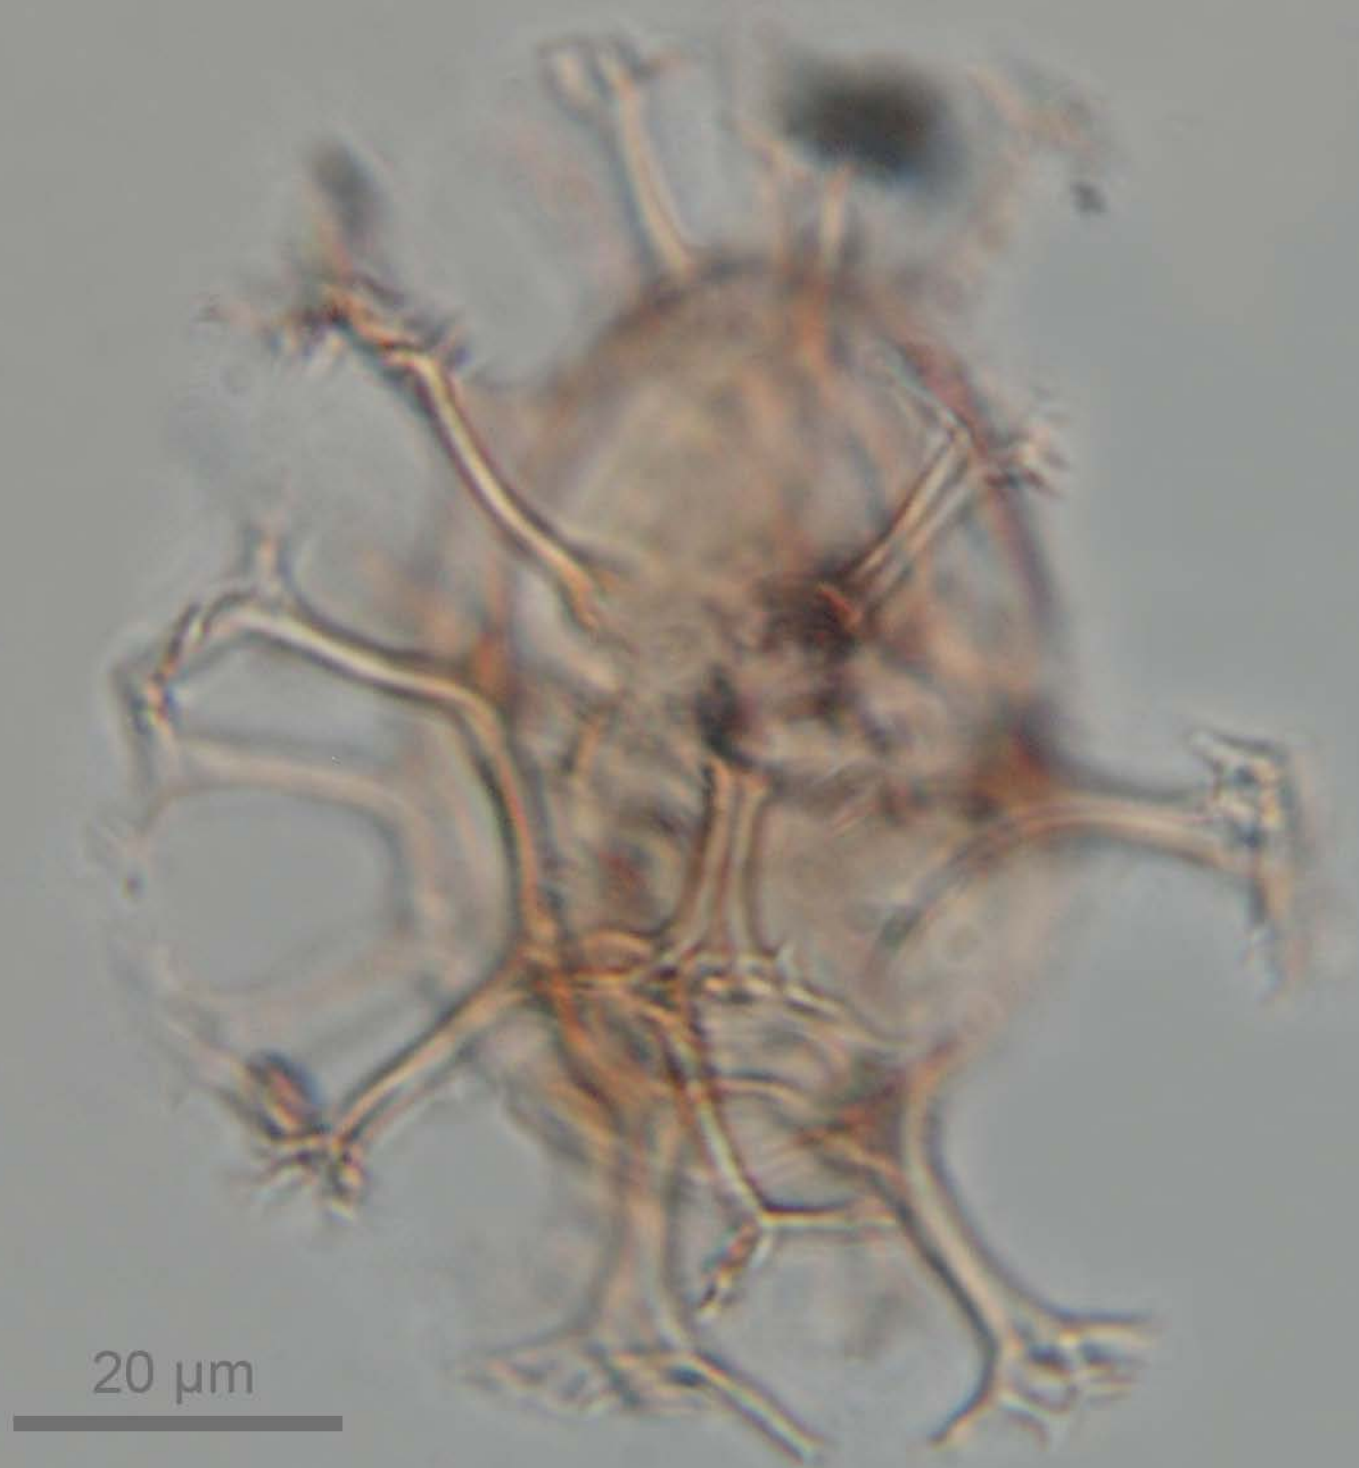

*Achomosphaera andalousiensis* Jan du Chêne 1977  
topotype

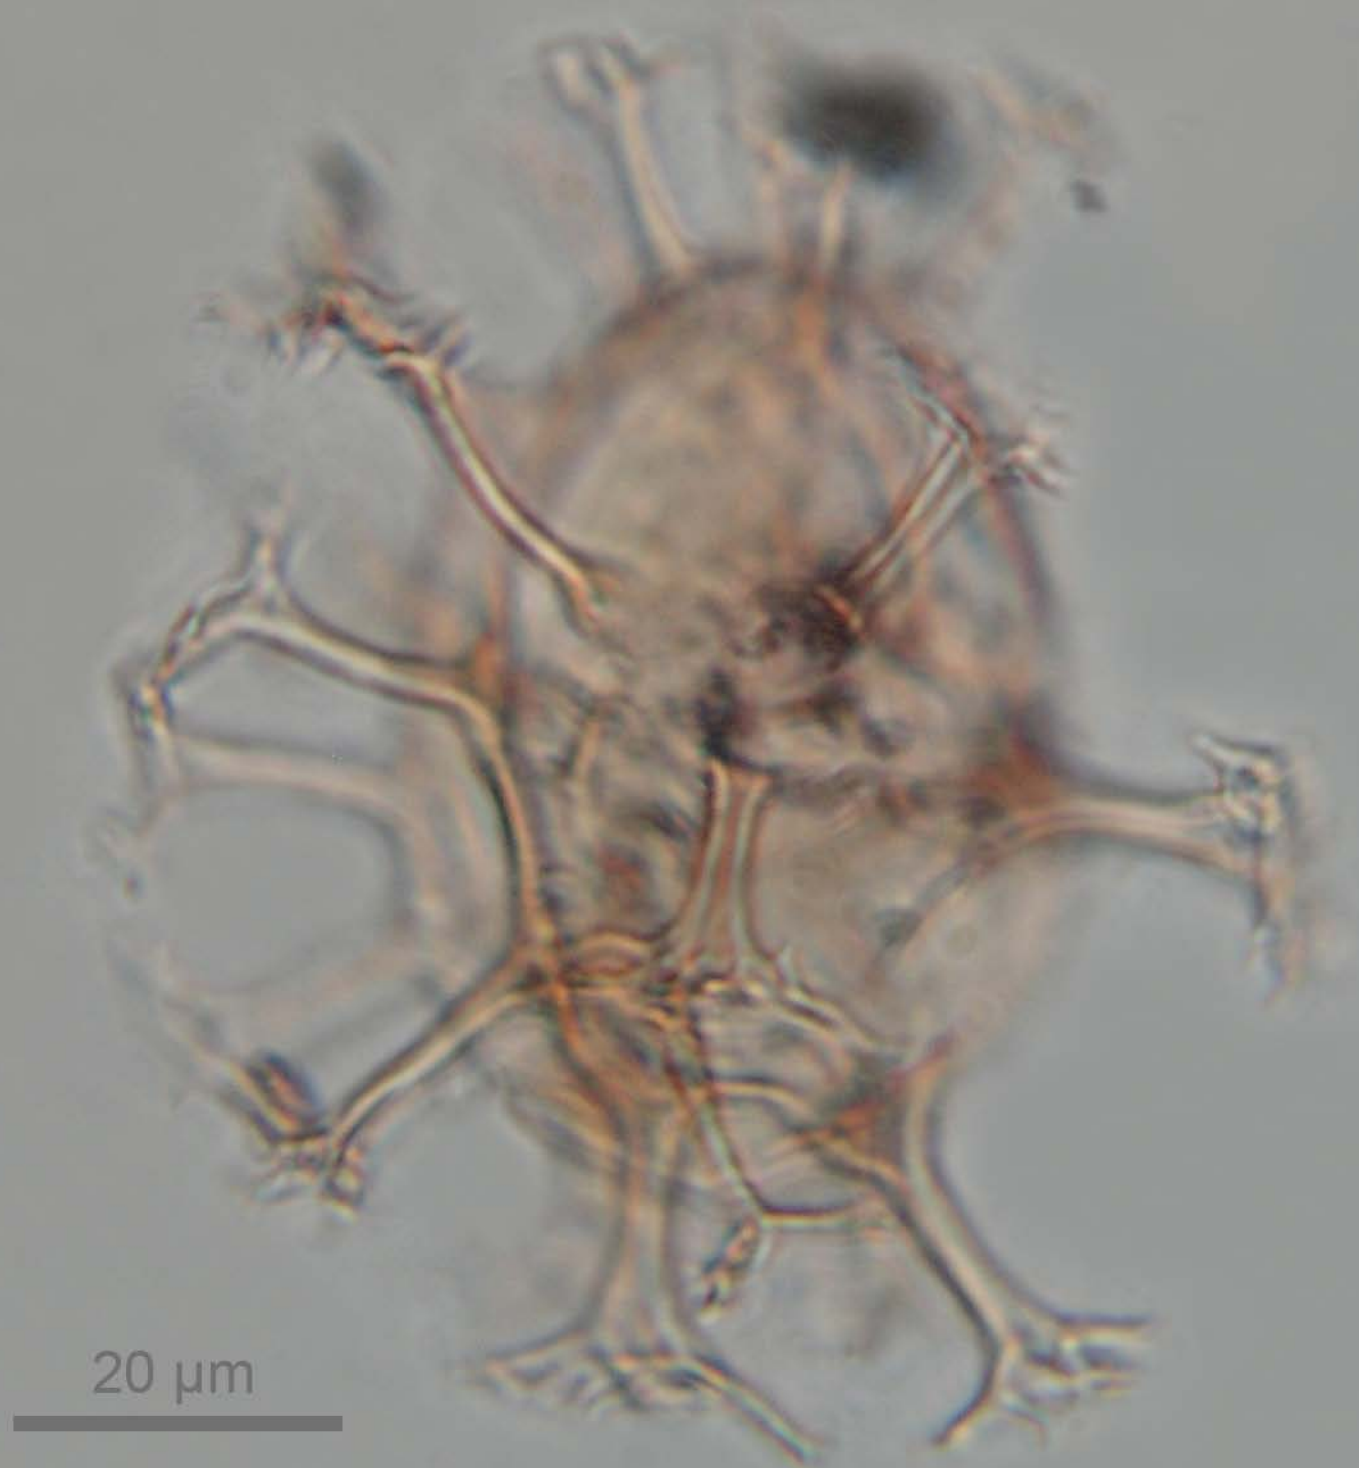

*Achomosphaera andalusiensis* Jan du Chêne 1977  
topotype

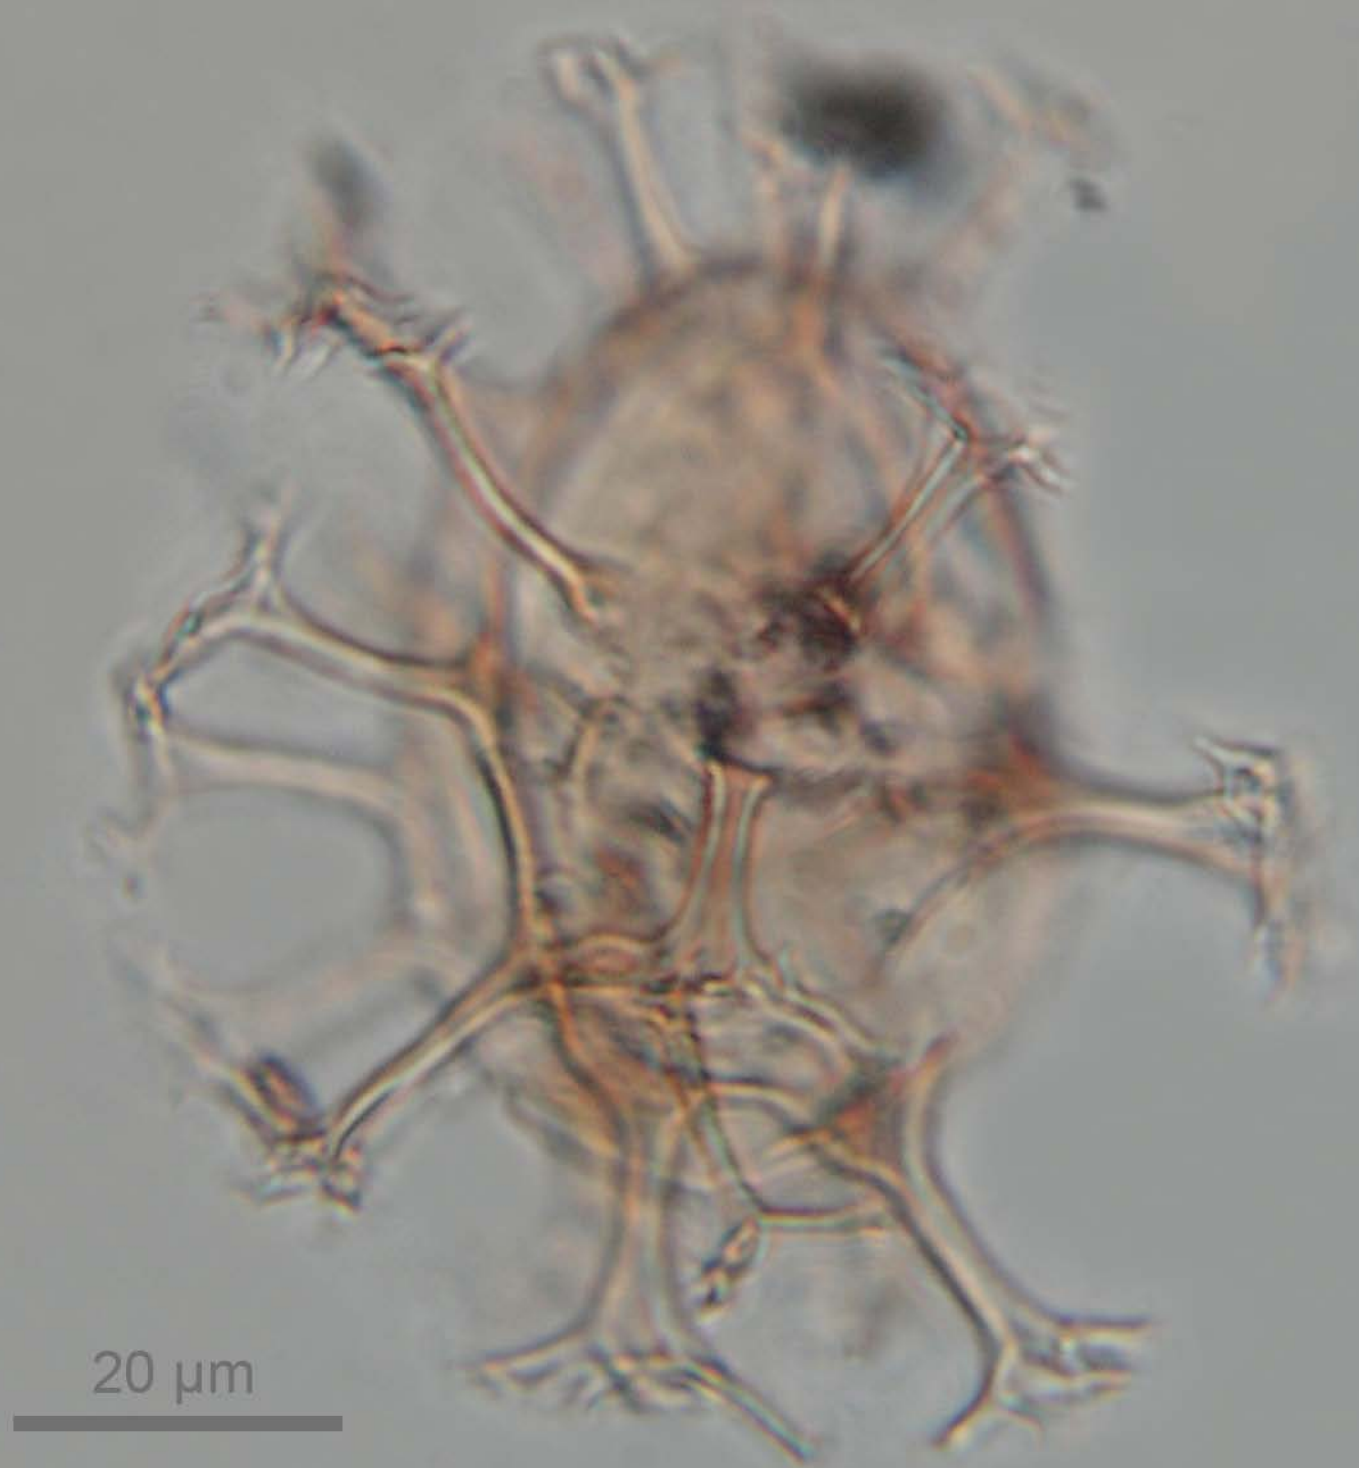

*Achomosphaera andalusiensis* Jan du Chêne 1977  
topotype



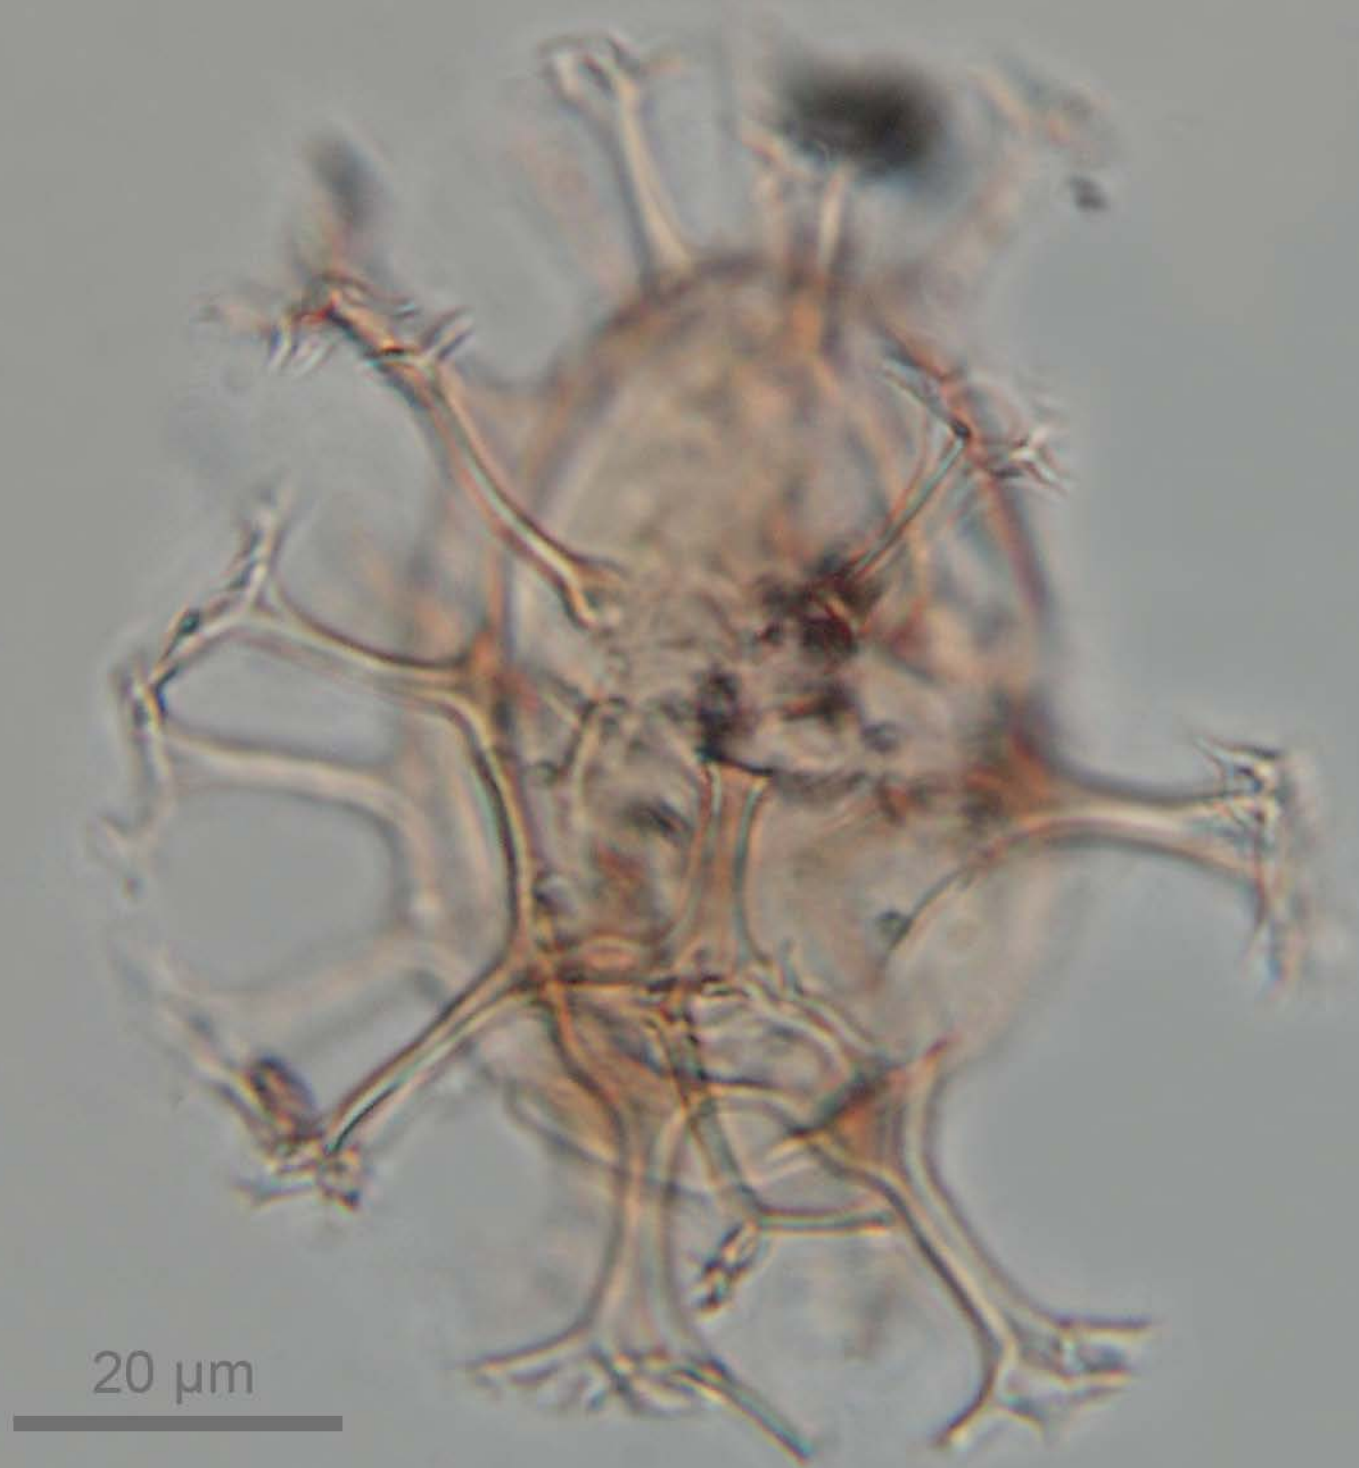

*Achomosphaera andalousiensis* Jan du Chêne 1977  
topotype

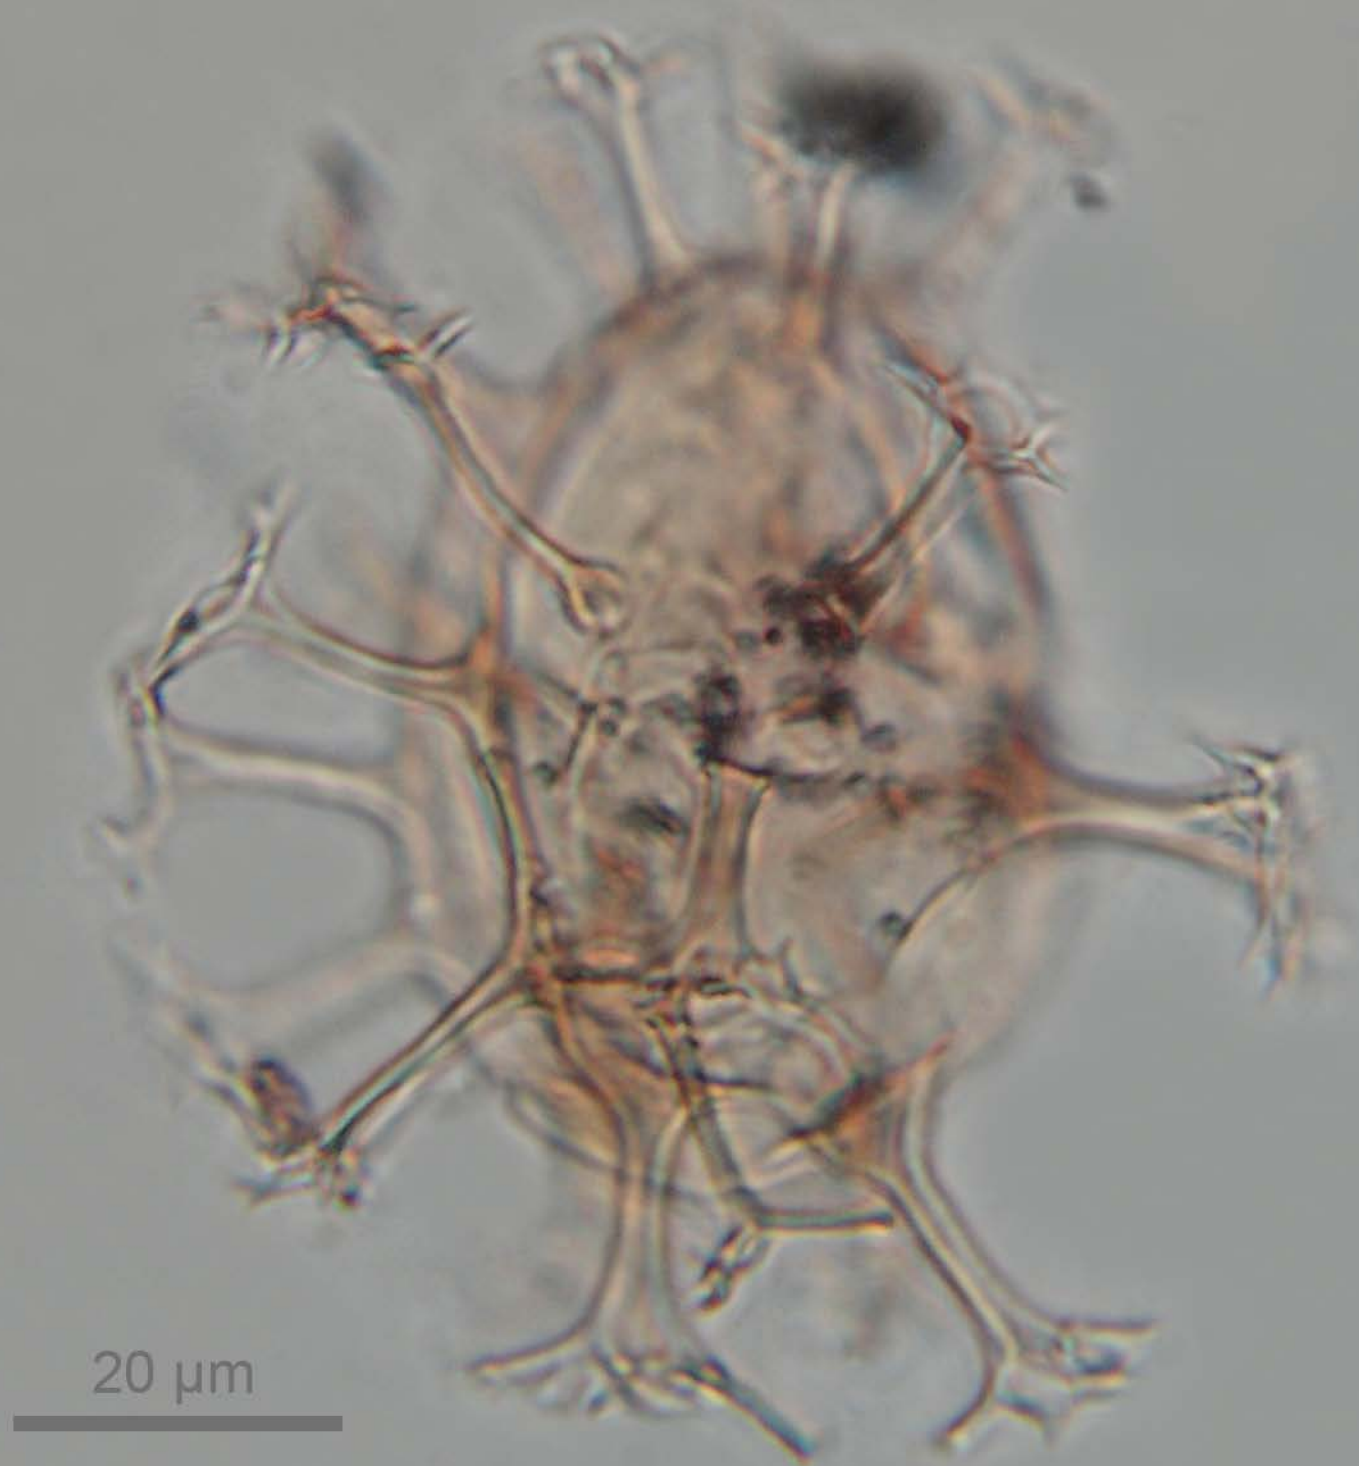

*Achomosphaera andalusiensis* Jan du Chêne 1977  
topotype

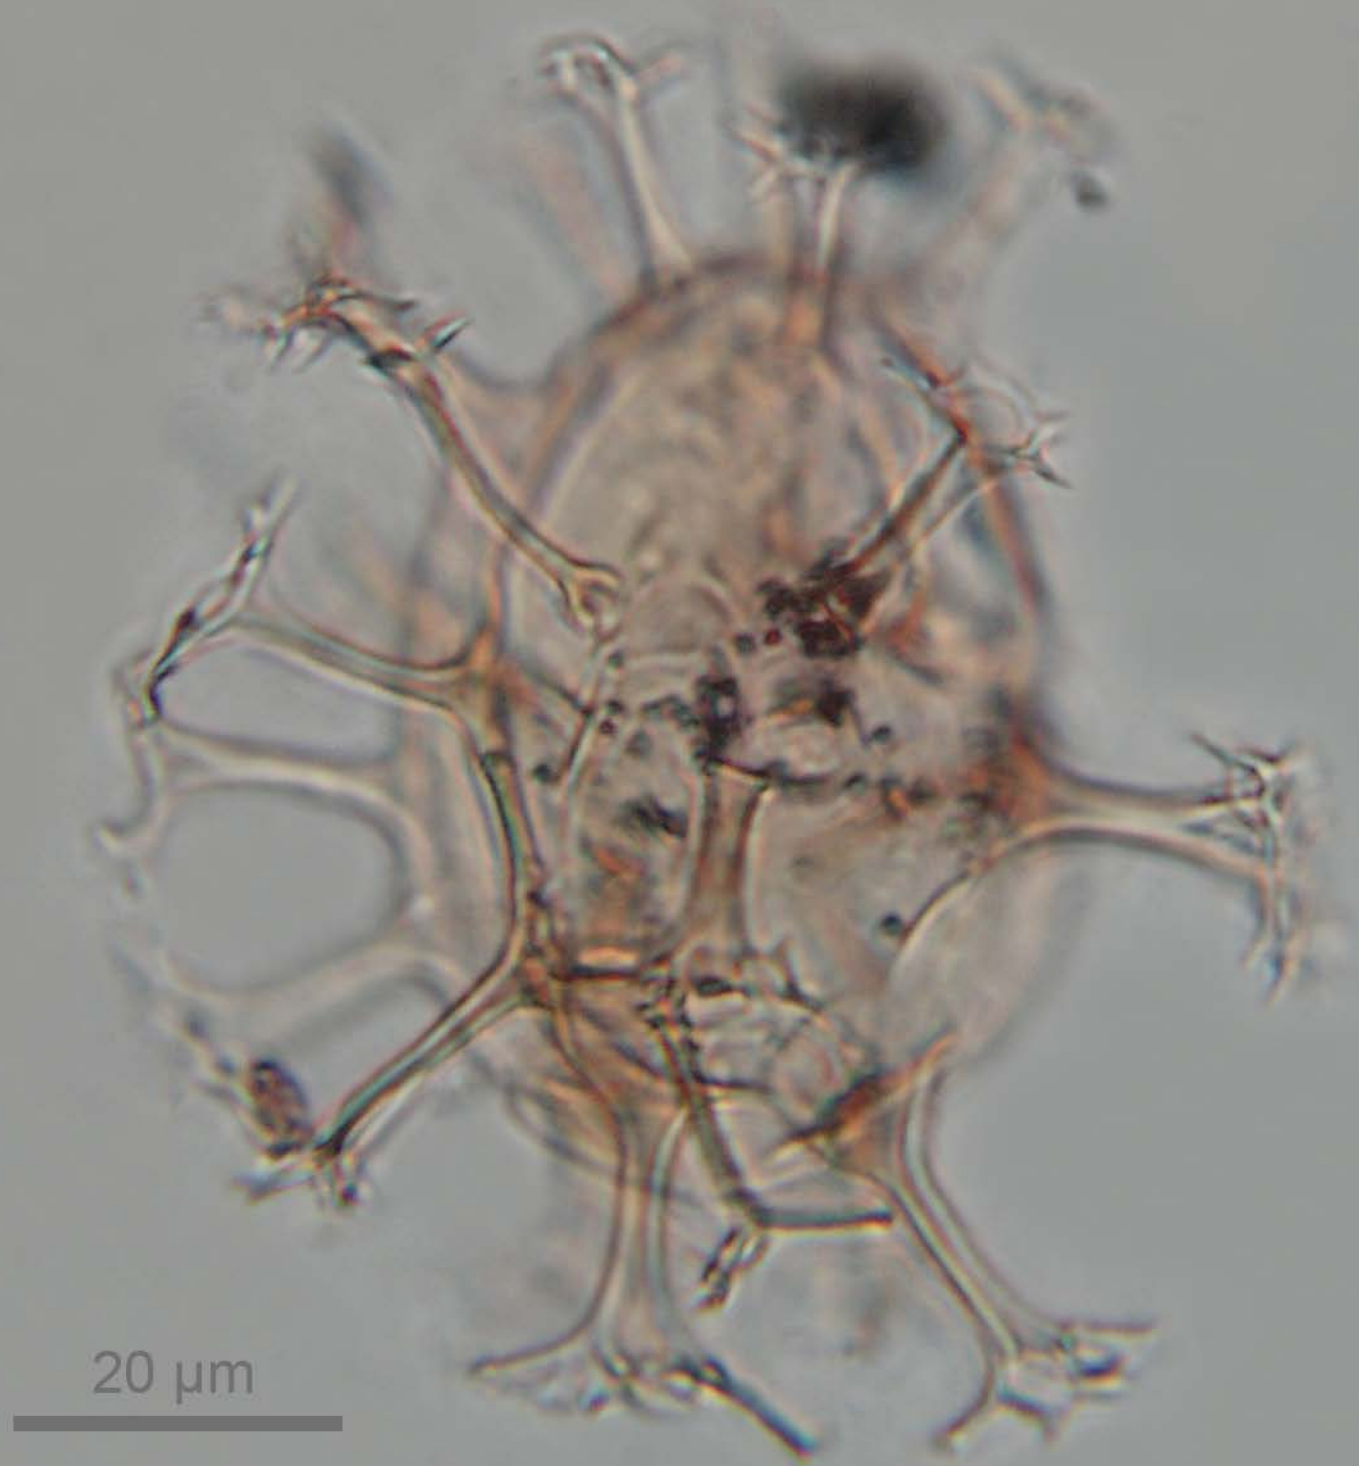

*Achomosphaera andalusiensis* Jan du Chêne 1977  
topotype



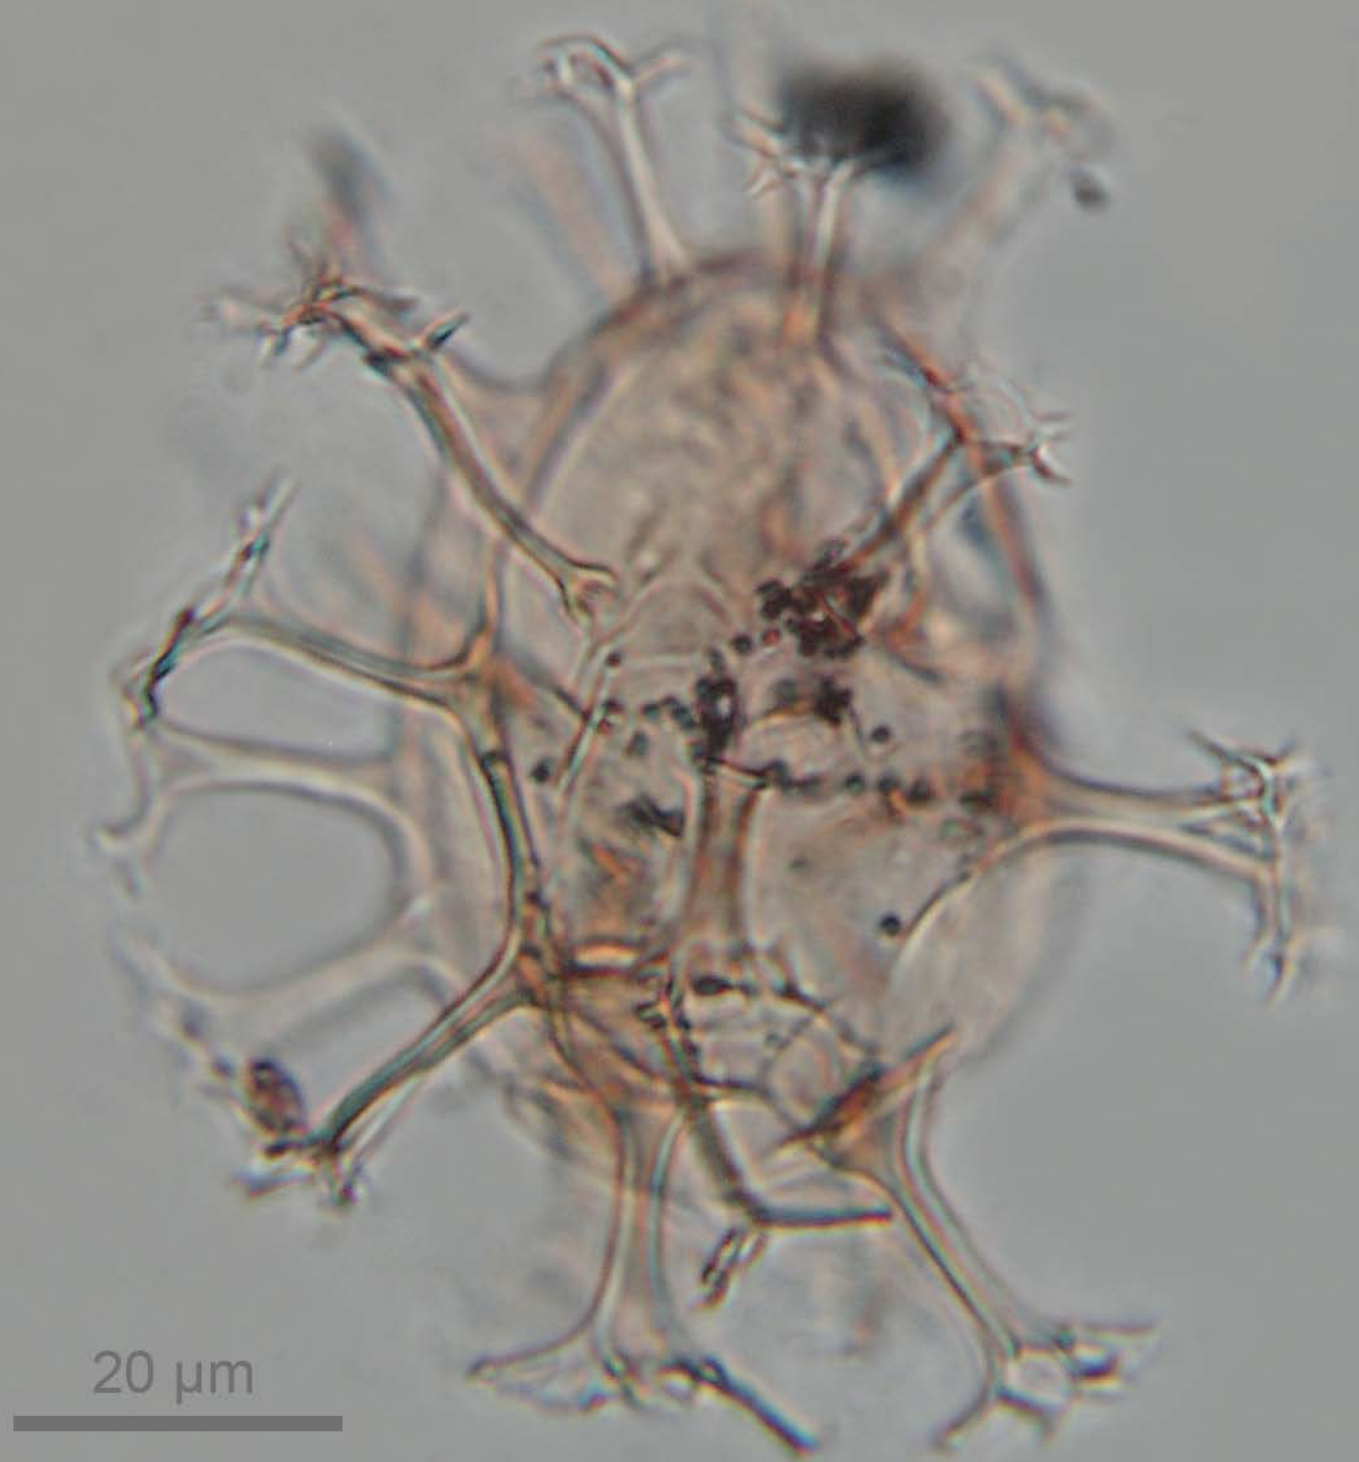

20  $\mu\text{m}$

*Achomosphaera andalusiensis* Jan du Chêne 1977  
topotype



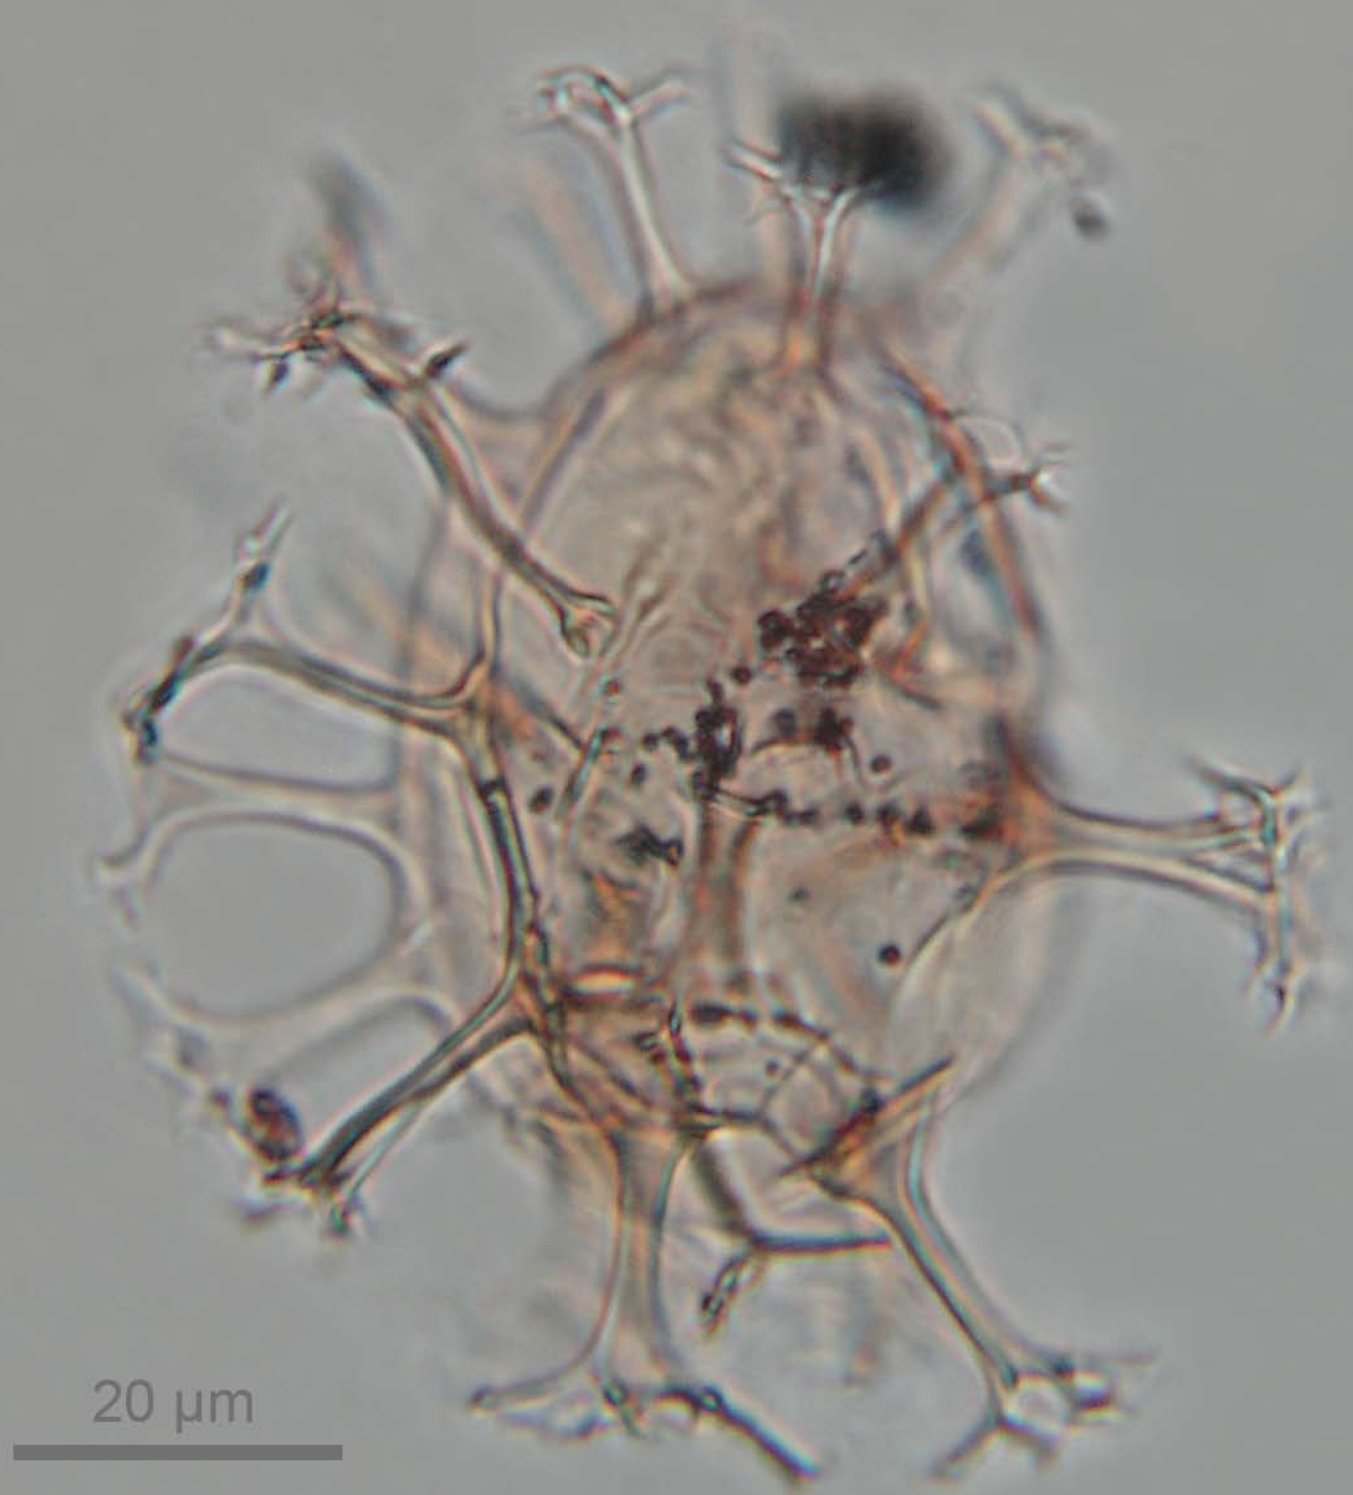

*Achomosphaera andalusiensis* Jan du Chêne 1977  
topotype

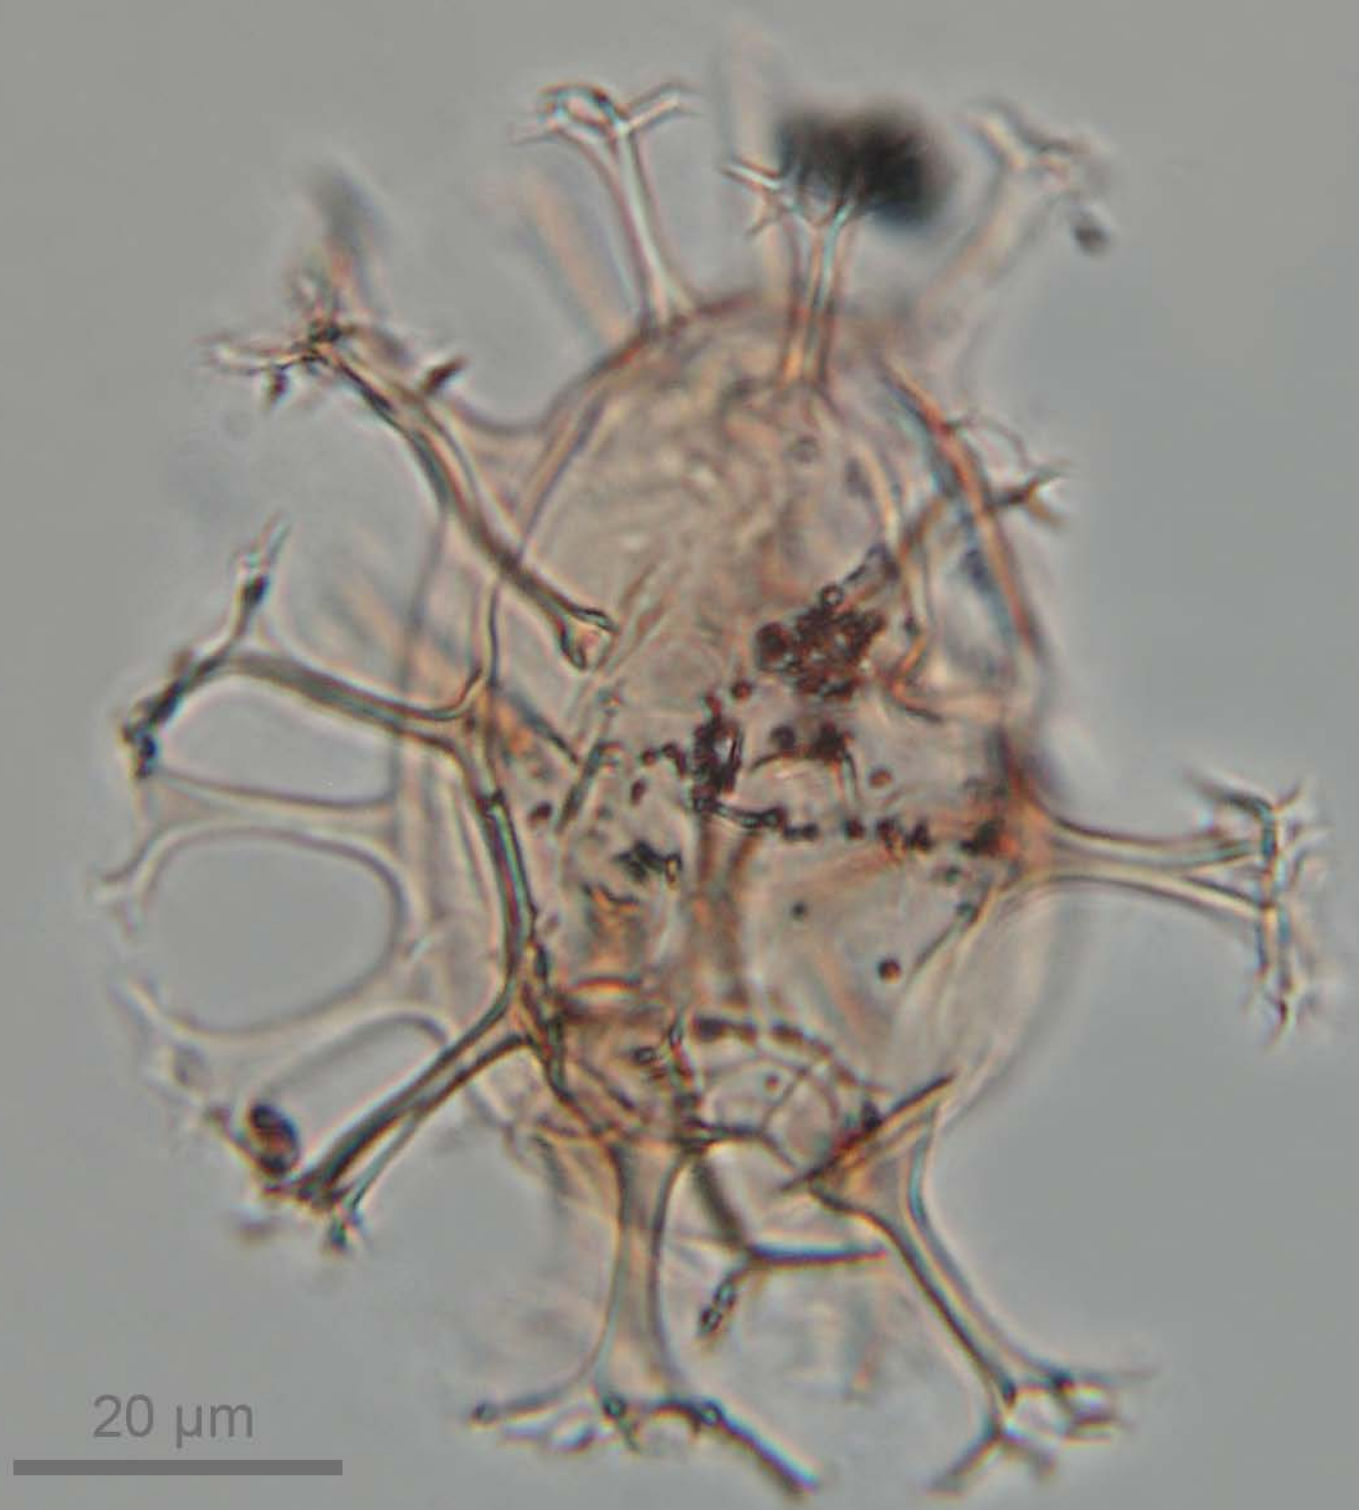

*Achomosphaera andalusiensis* Jan du Chêne 1977  
topotype

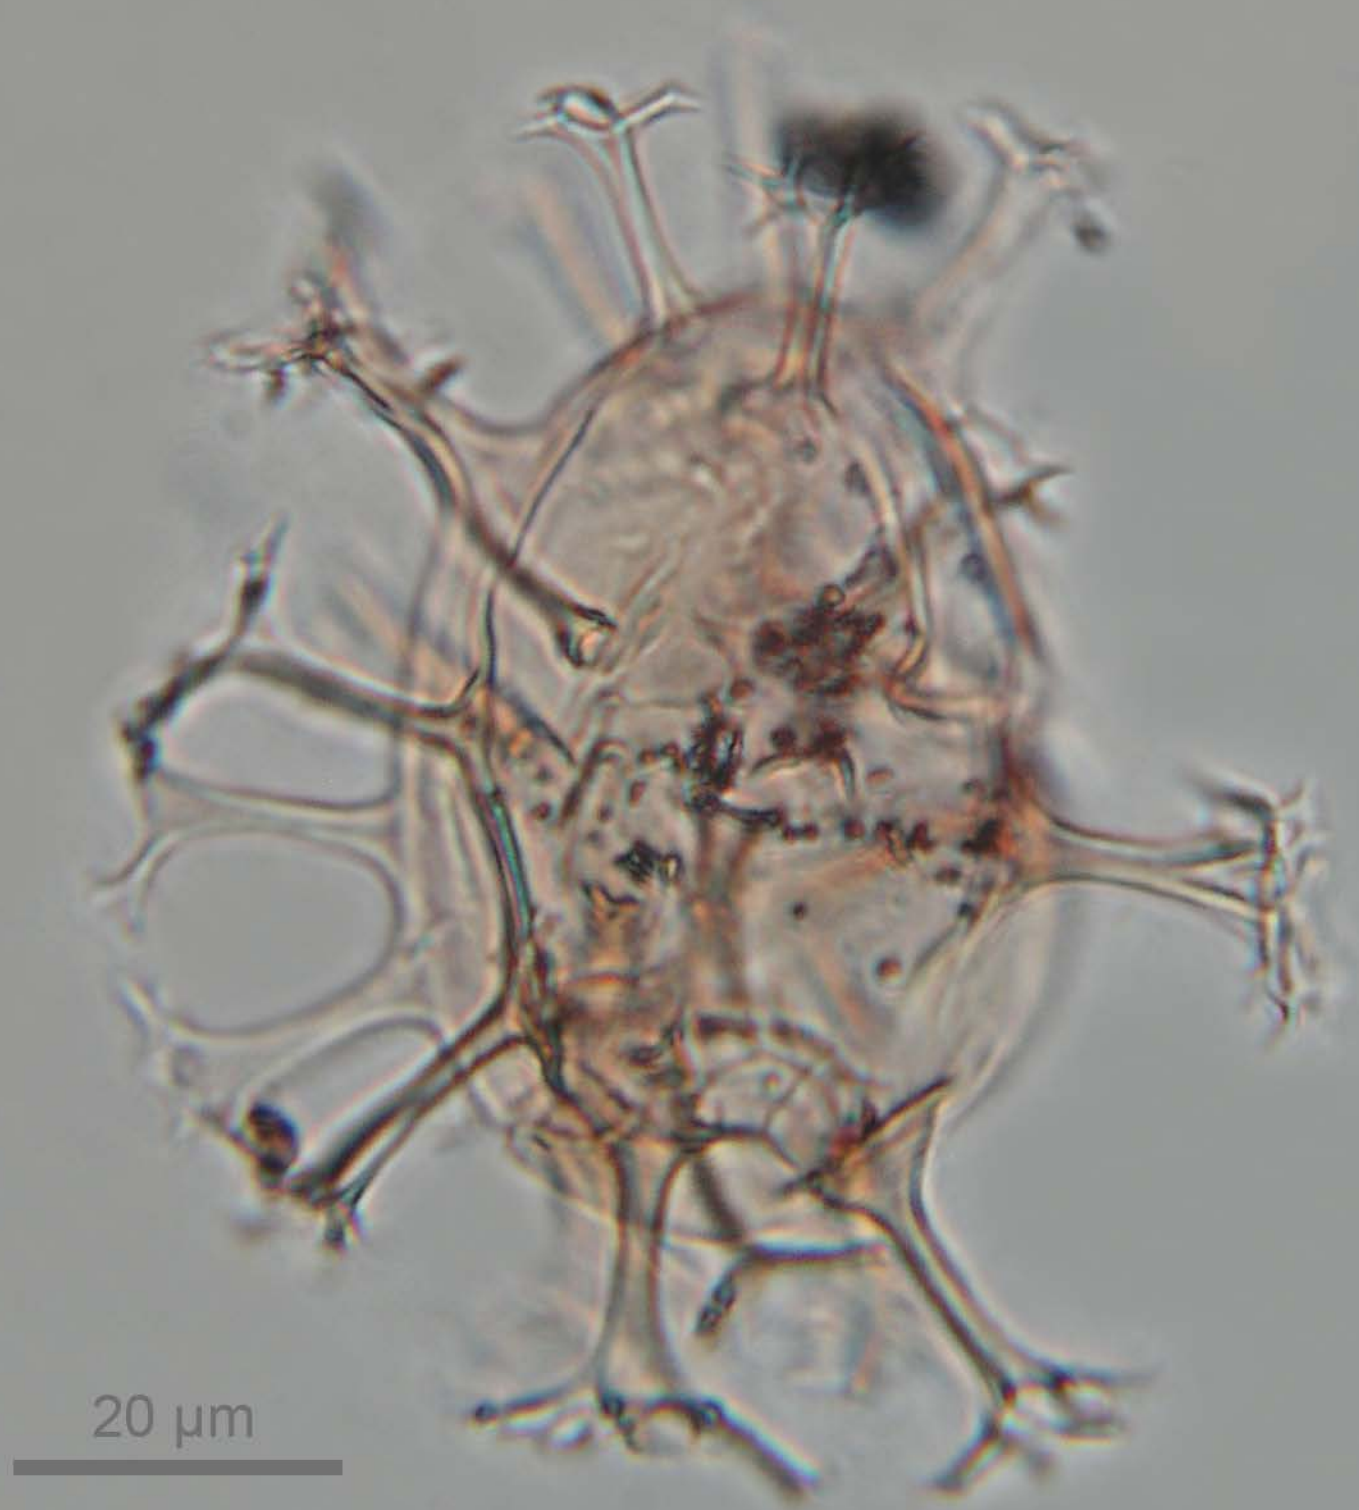

*Achomosphaera andalusiensis* Jan du Chêne 1977  
topotype



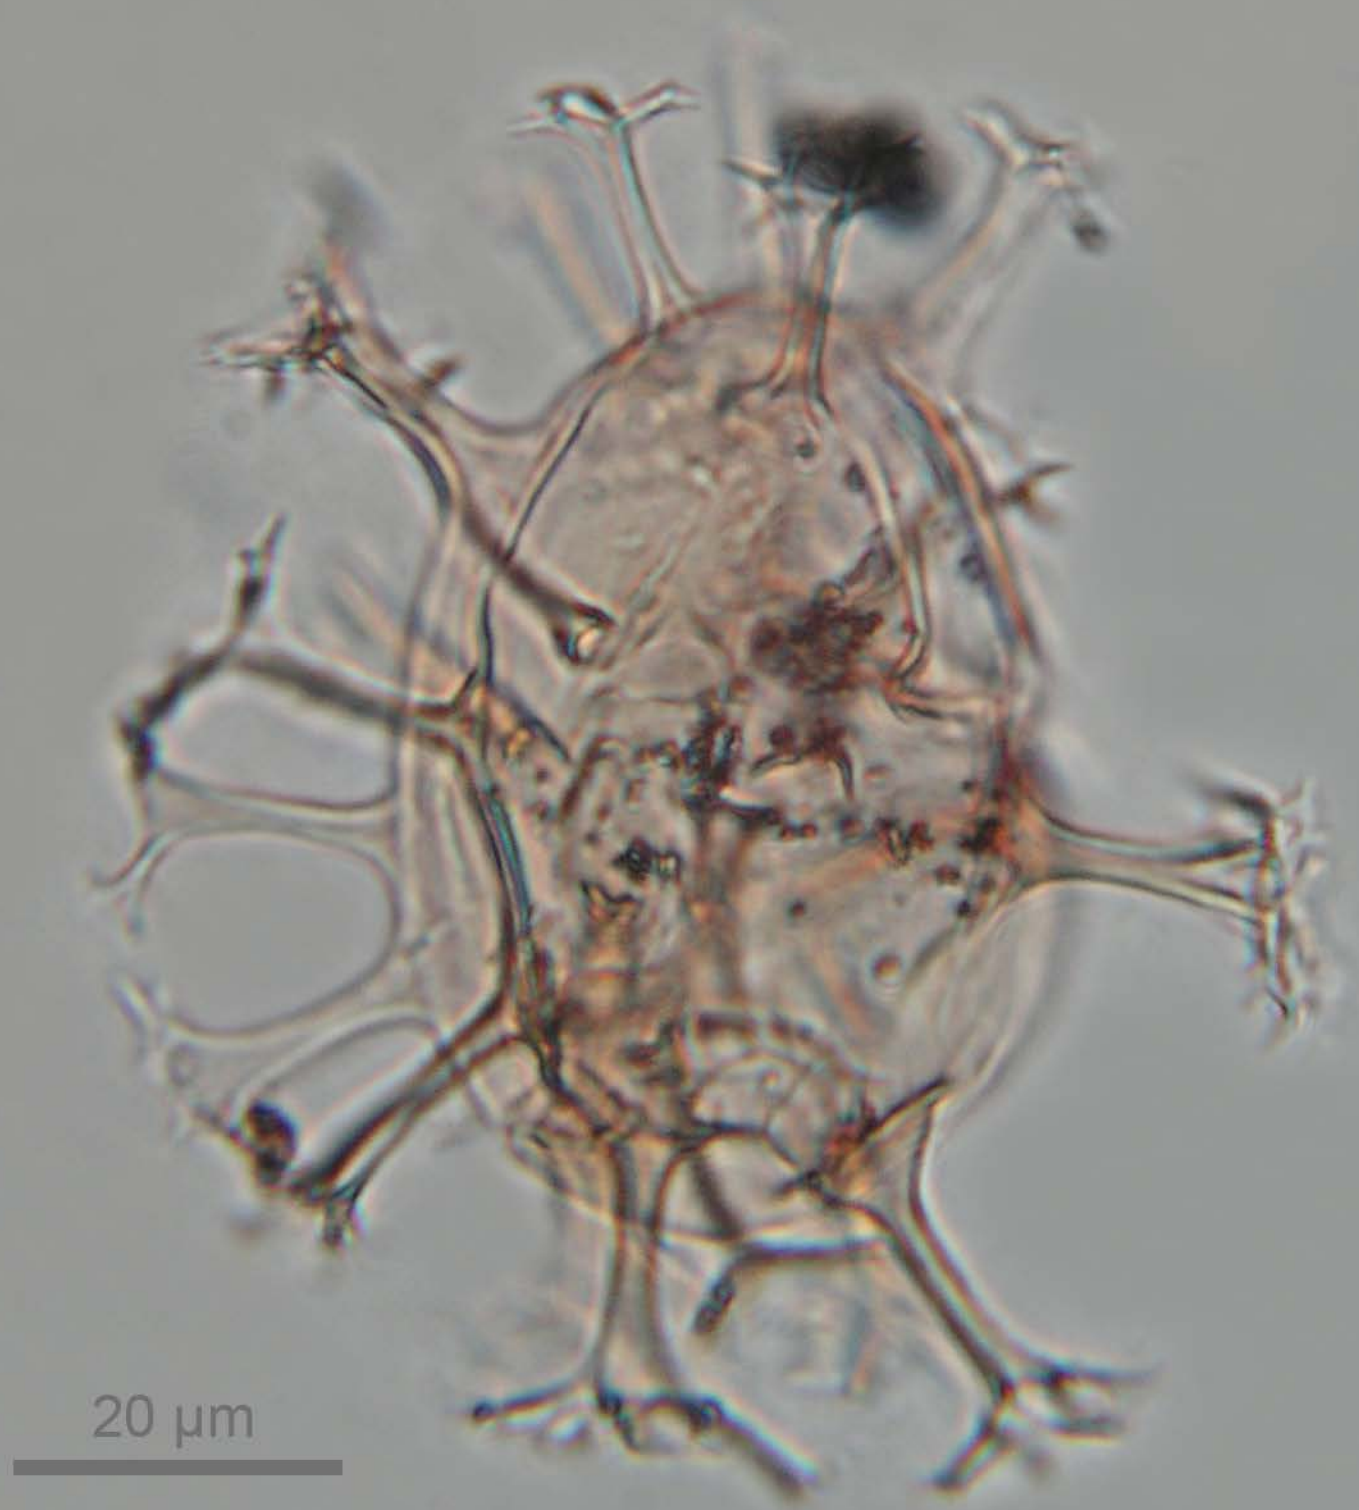

*Achomosphaera andalusiensis* Jan du Chêne 1977  
topotype



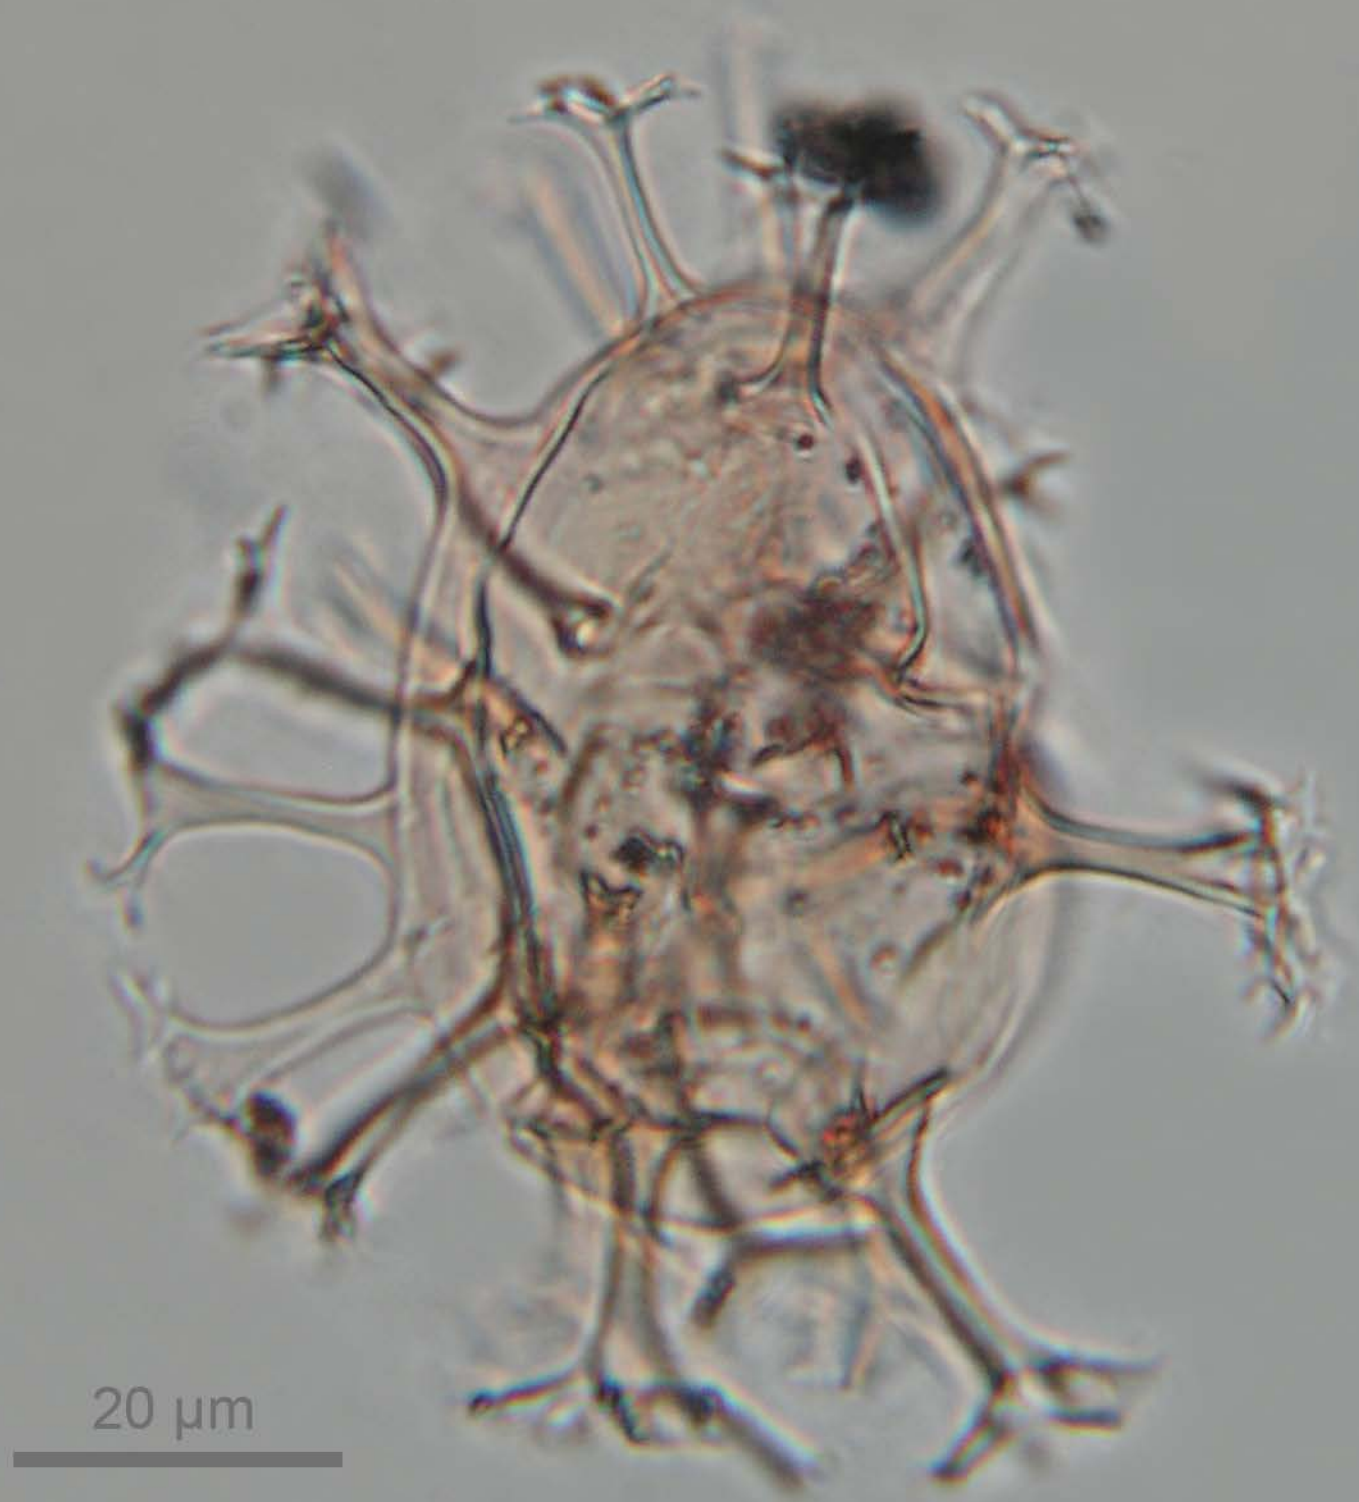

*Achomosphaera andalusiensis* Jan du Chêne 1977  
topotype

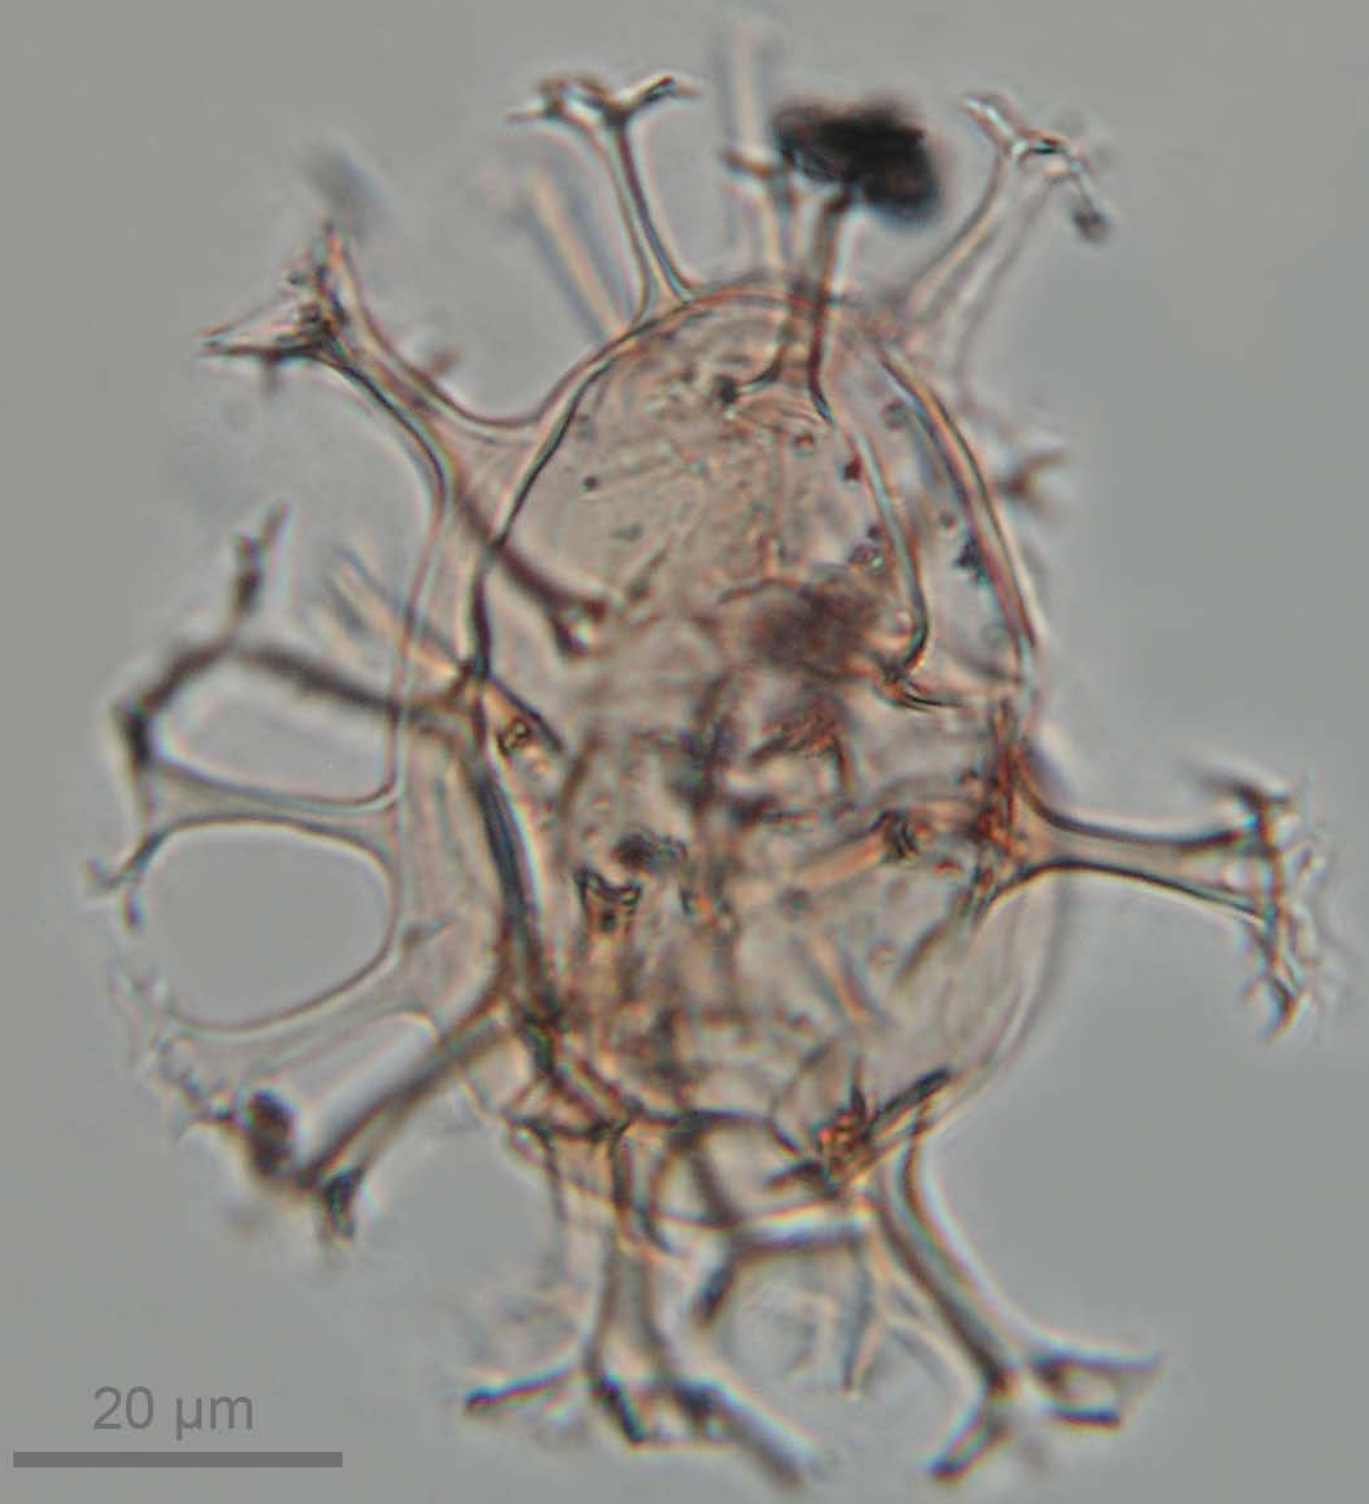

*Achomosphaera andalusiensis* Jan du Chêne 1977  
topotype

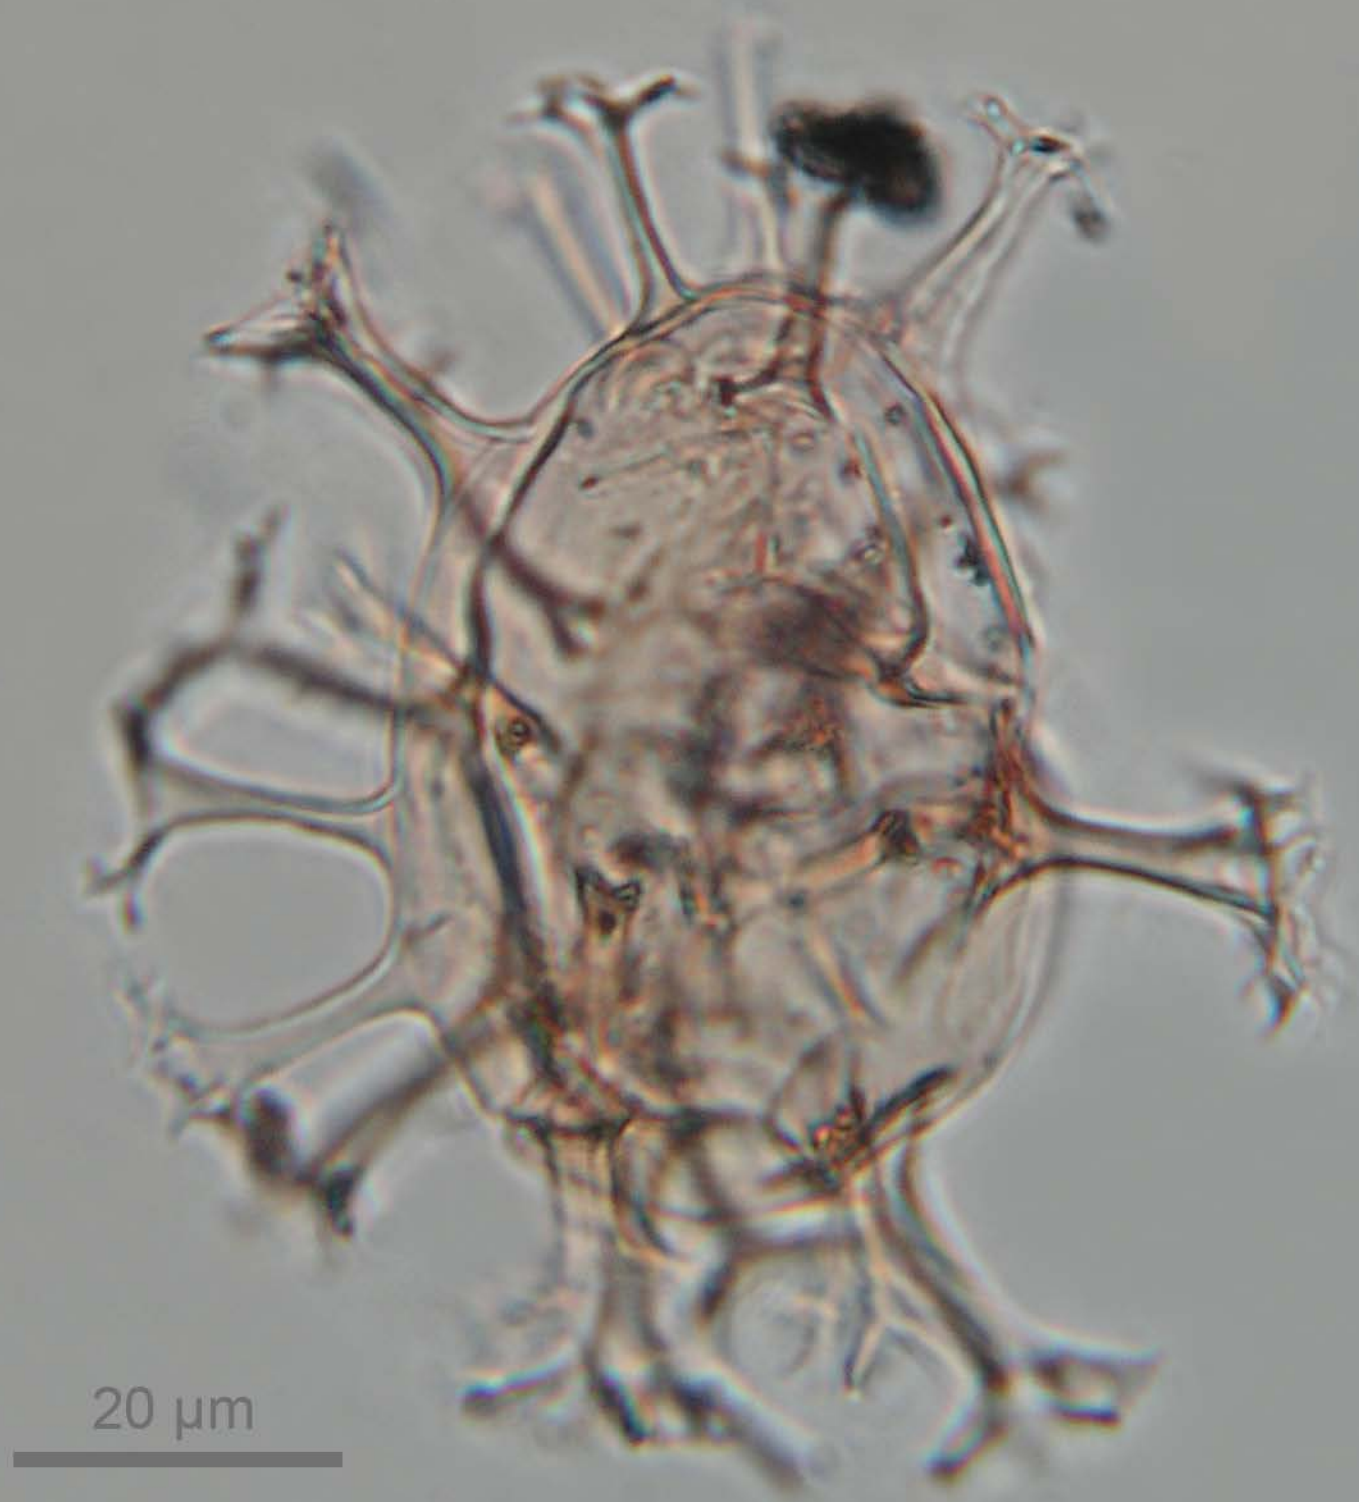

*Achomosphaera andalusiensis* Jan du Chêne 1977  
topotype



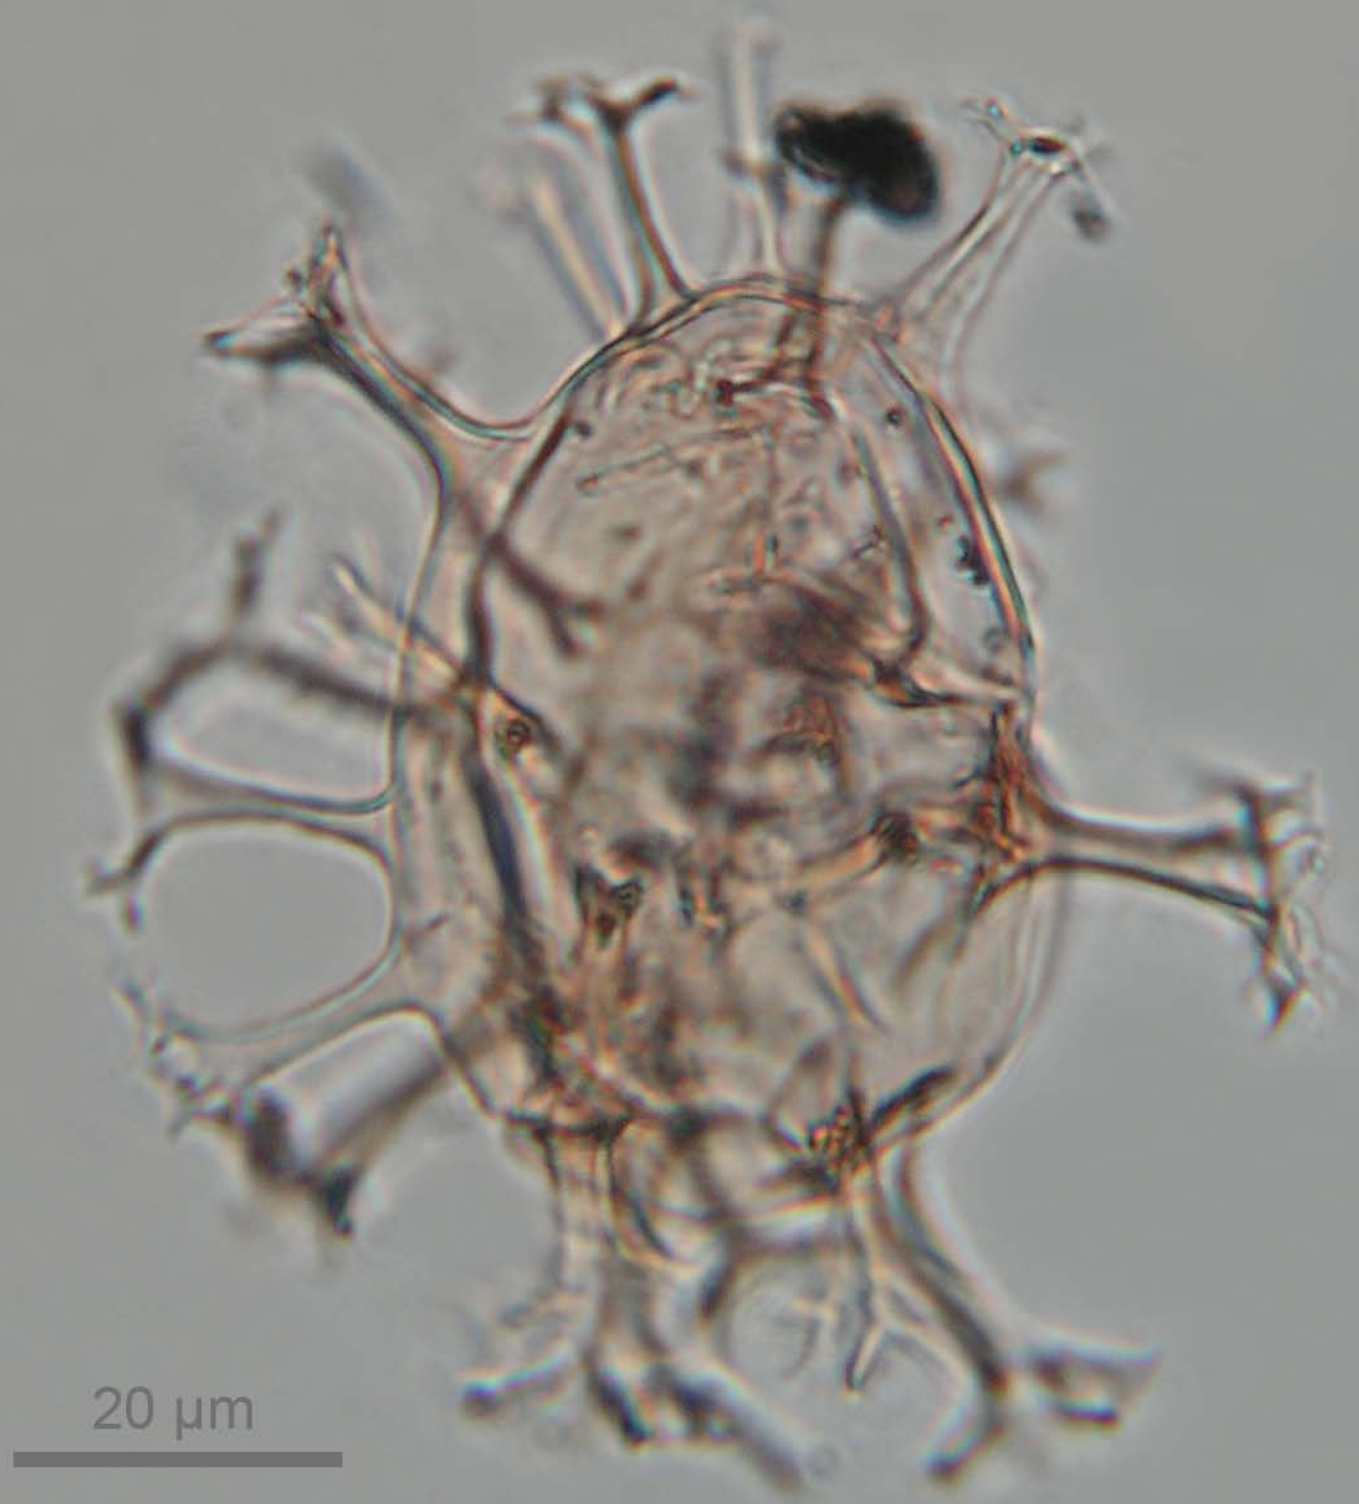

*Achomosphaera andalousiensis* Jan du Chêne 1977  
topotype



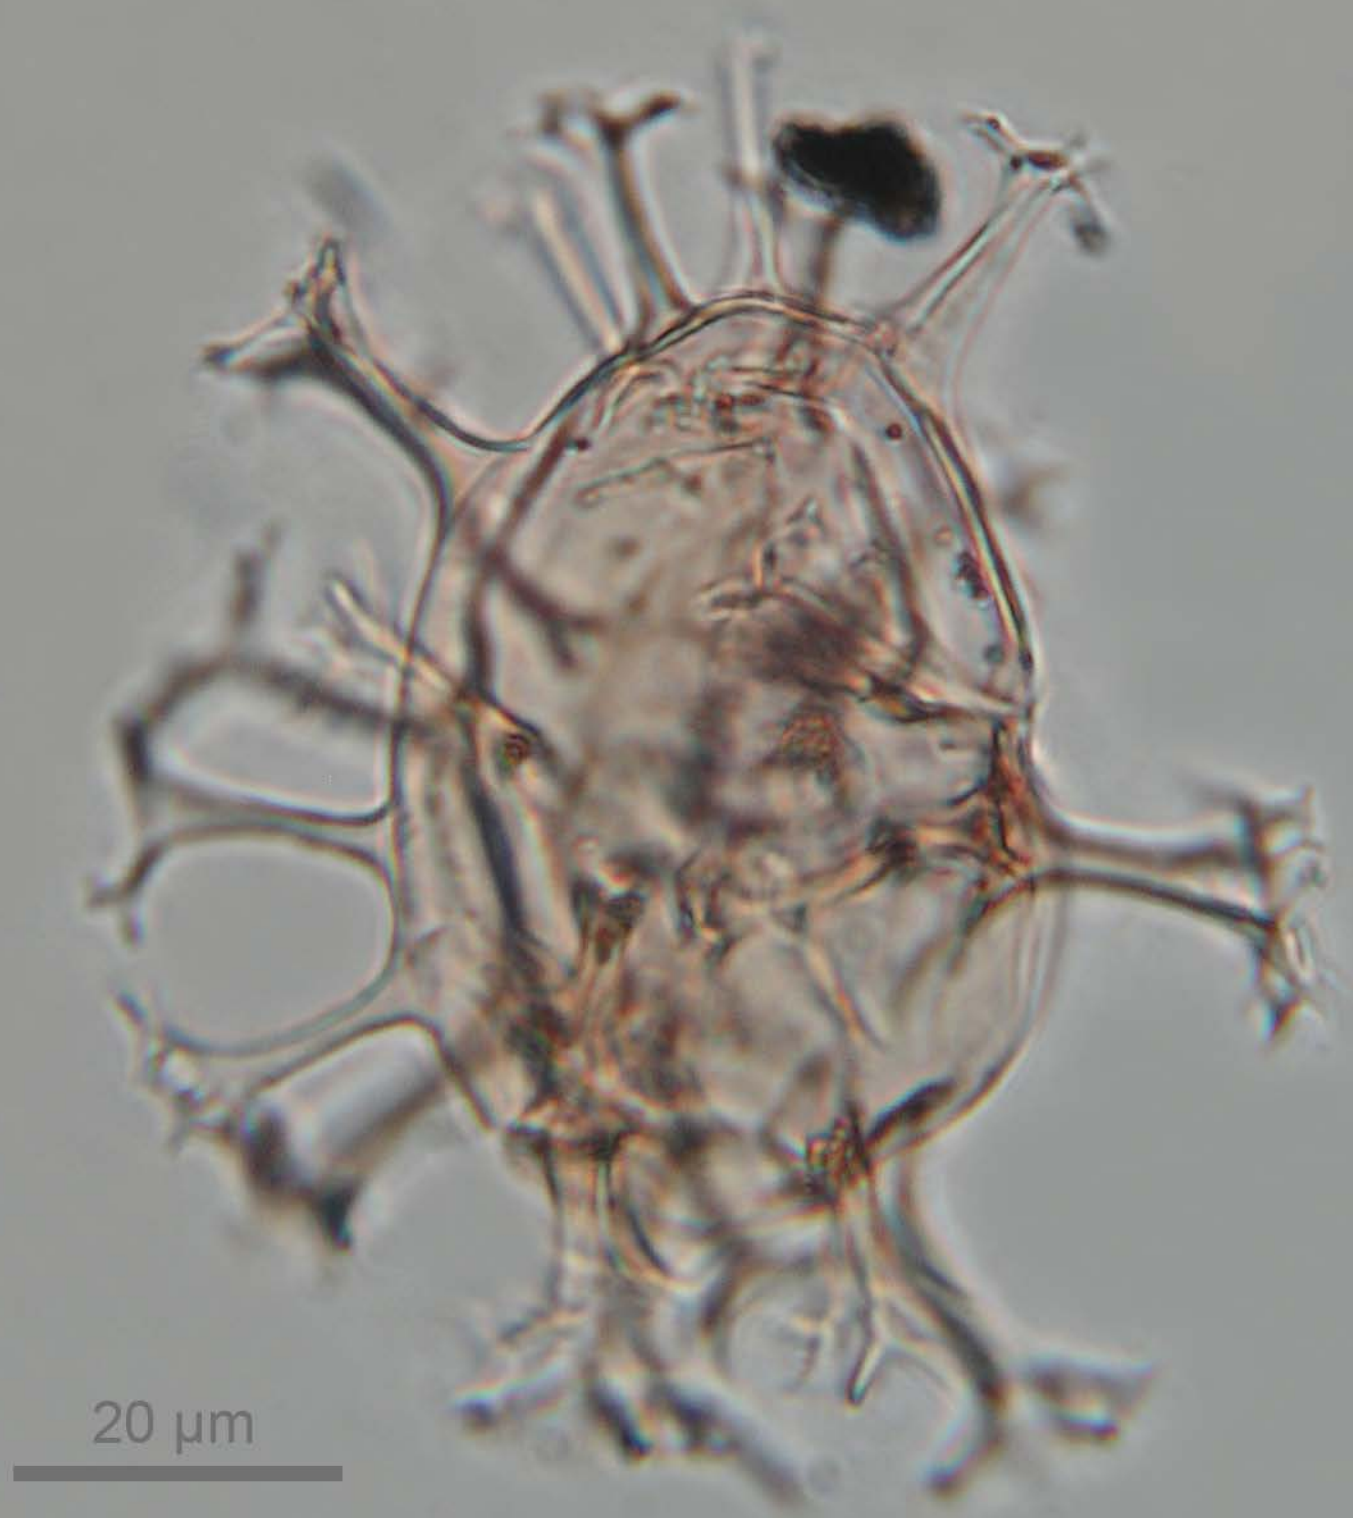

*Achomosphaera andalusiensis* Jan du Chêne 1977  
topotype

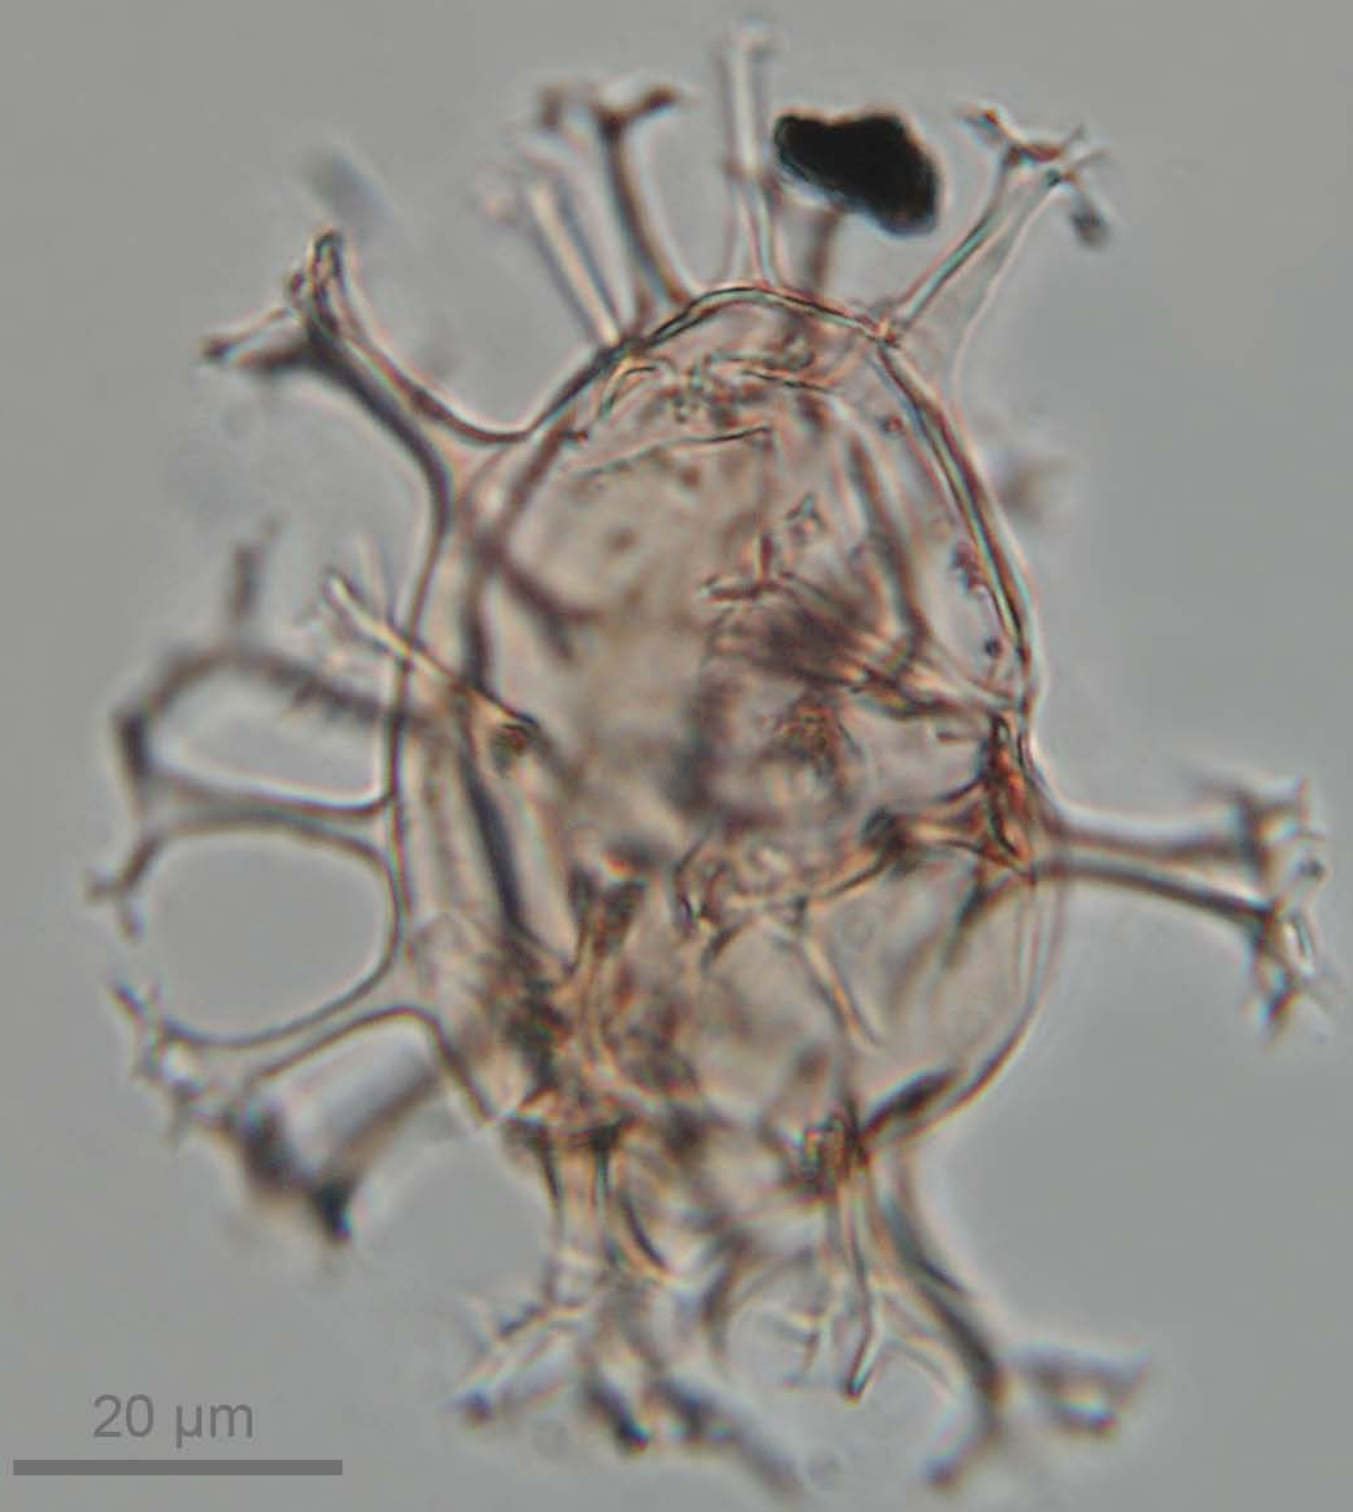

*Achomosphaera andalusiensis* Jan du Chêne 1977  
topotype

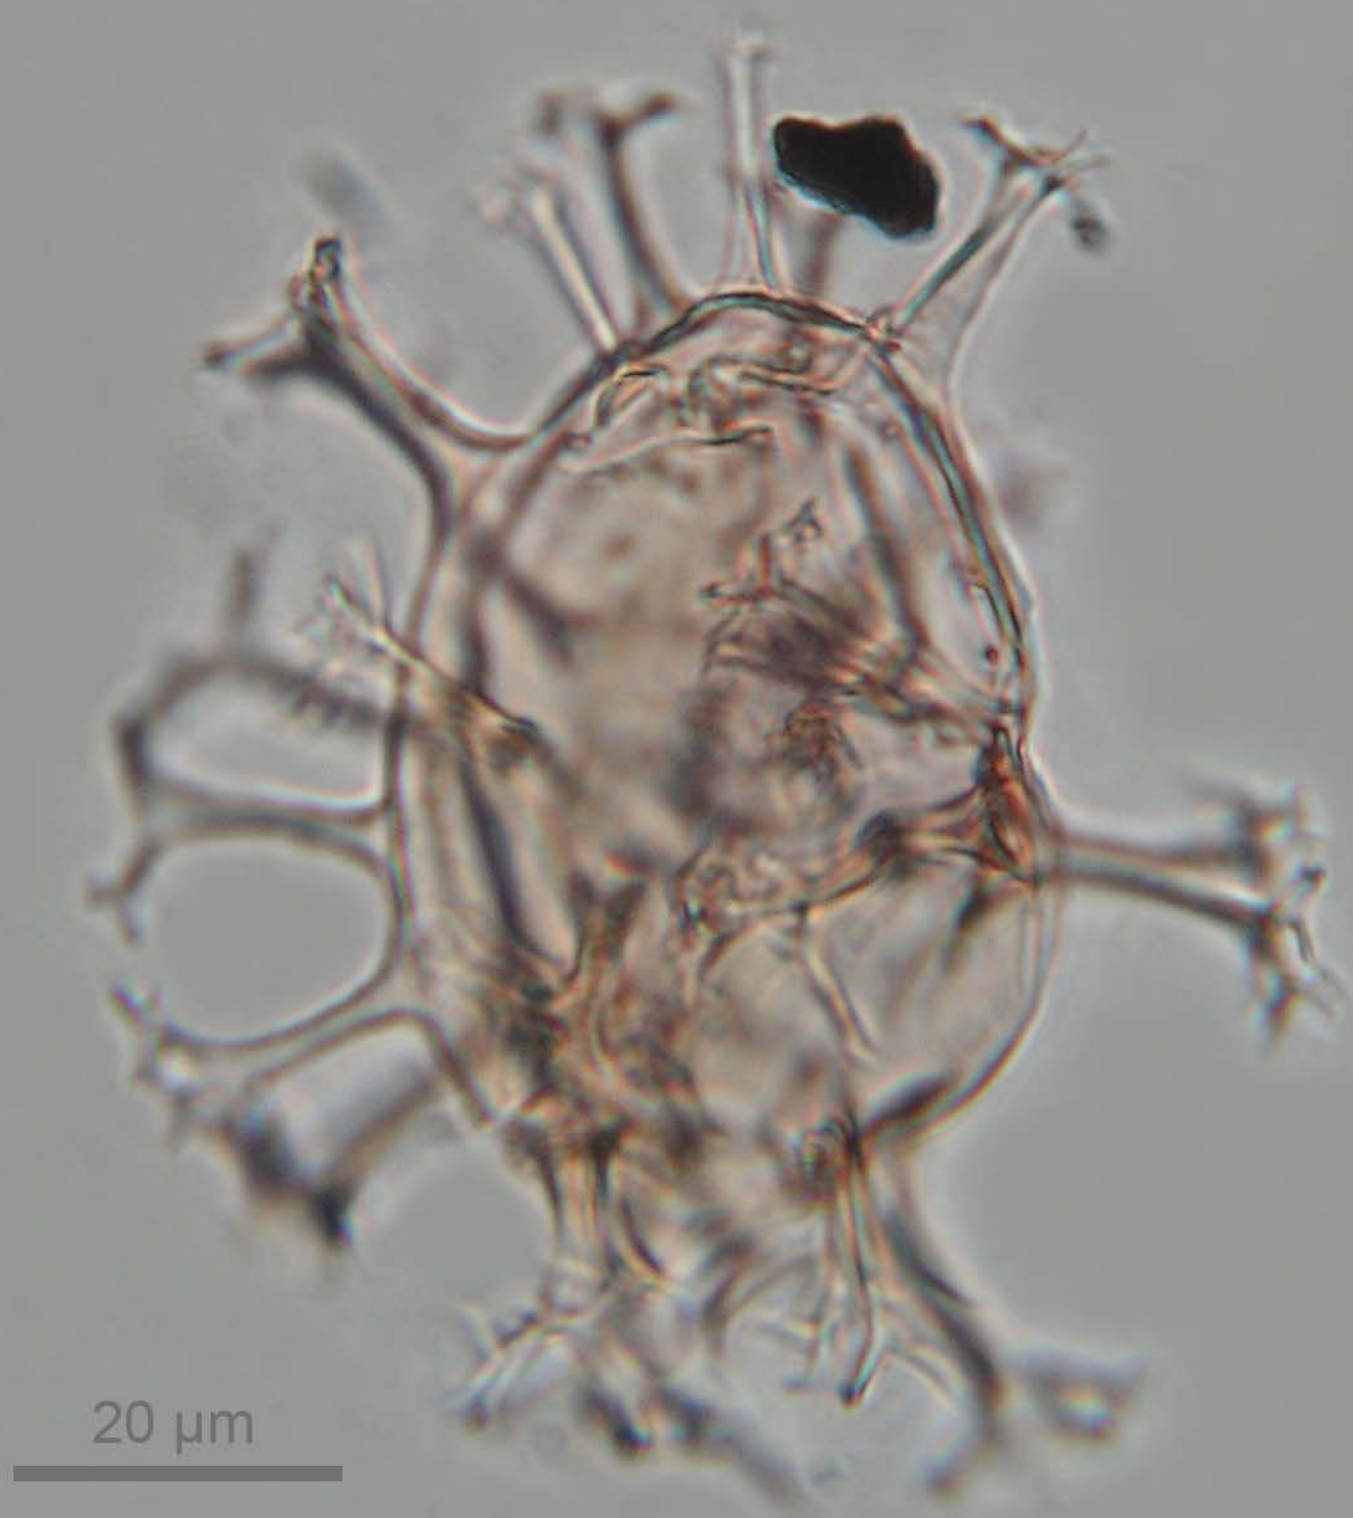

*Achomosphaera andalusiensis* Jan du Chêne 1977  
topotype



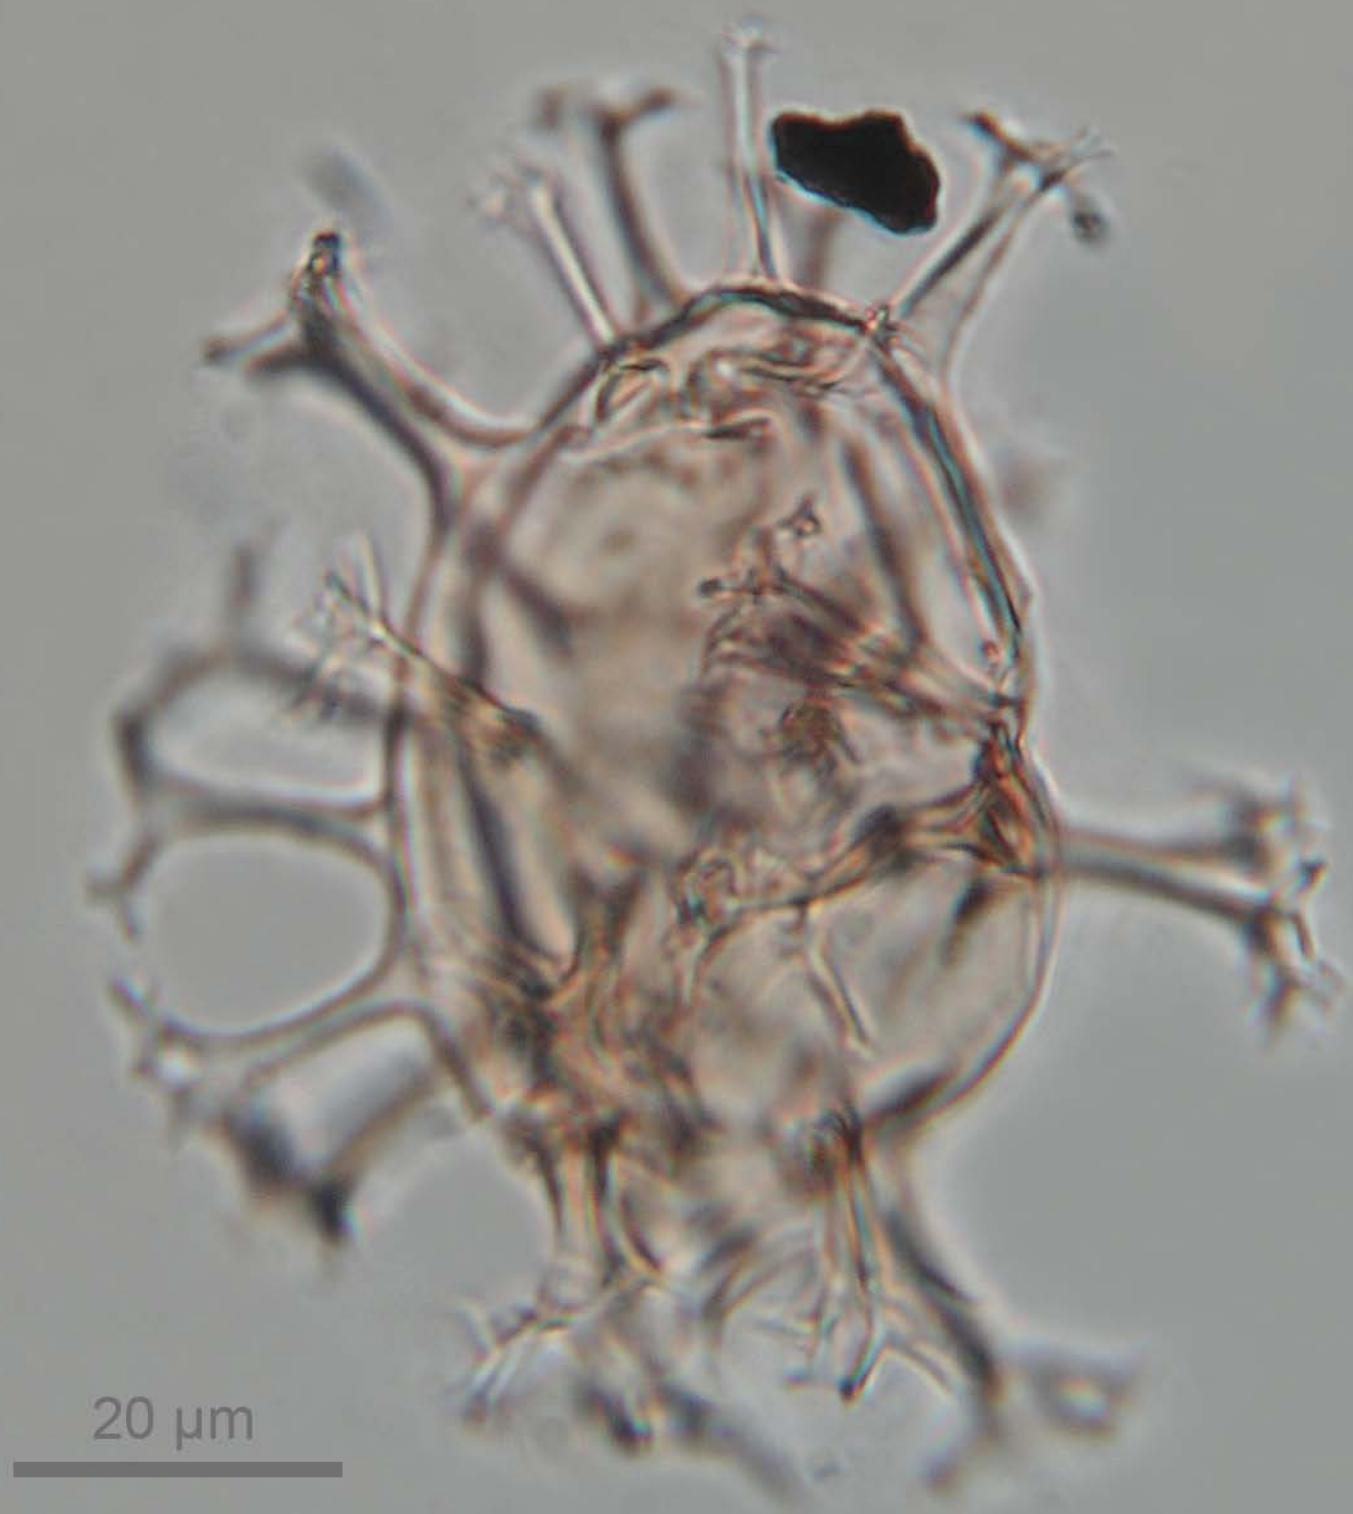

*Achomosphaera andalusiensis* Jan du Chêne 1977  
topotype



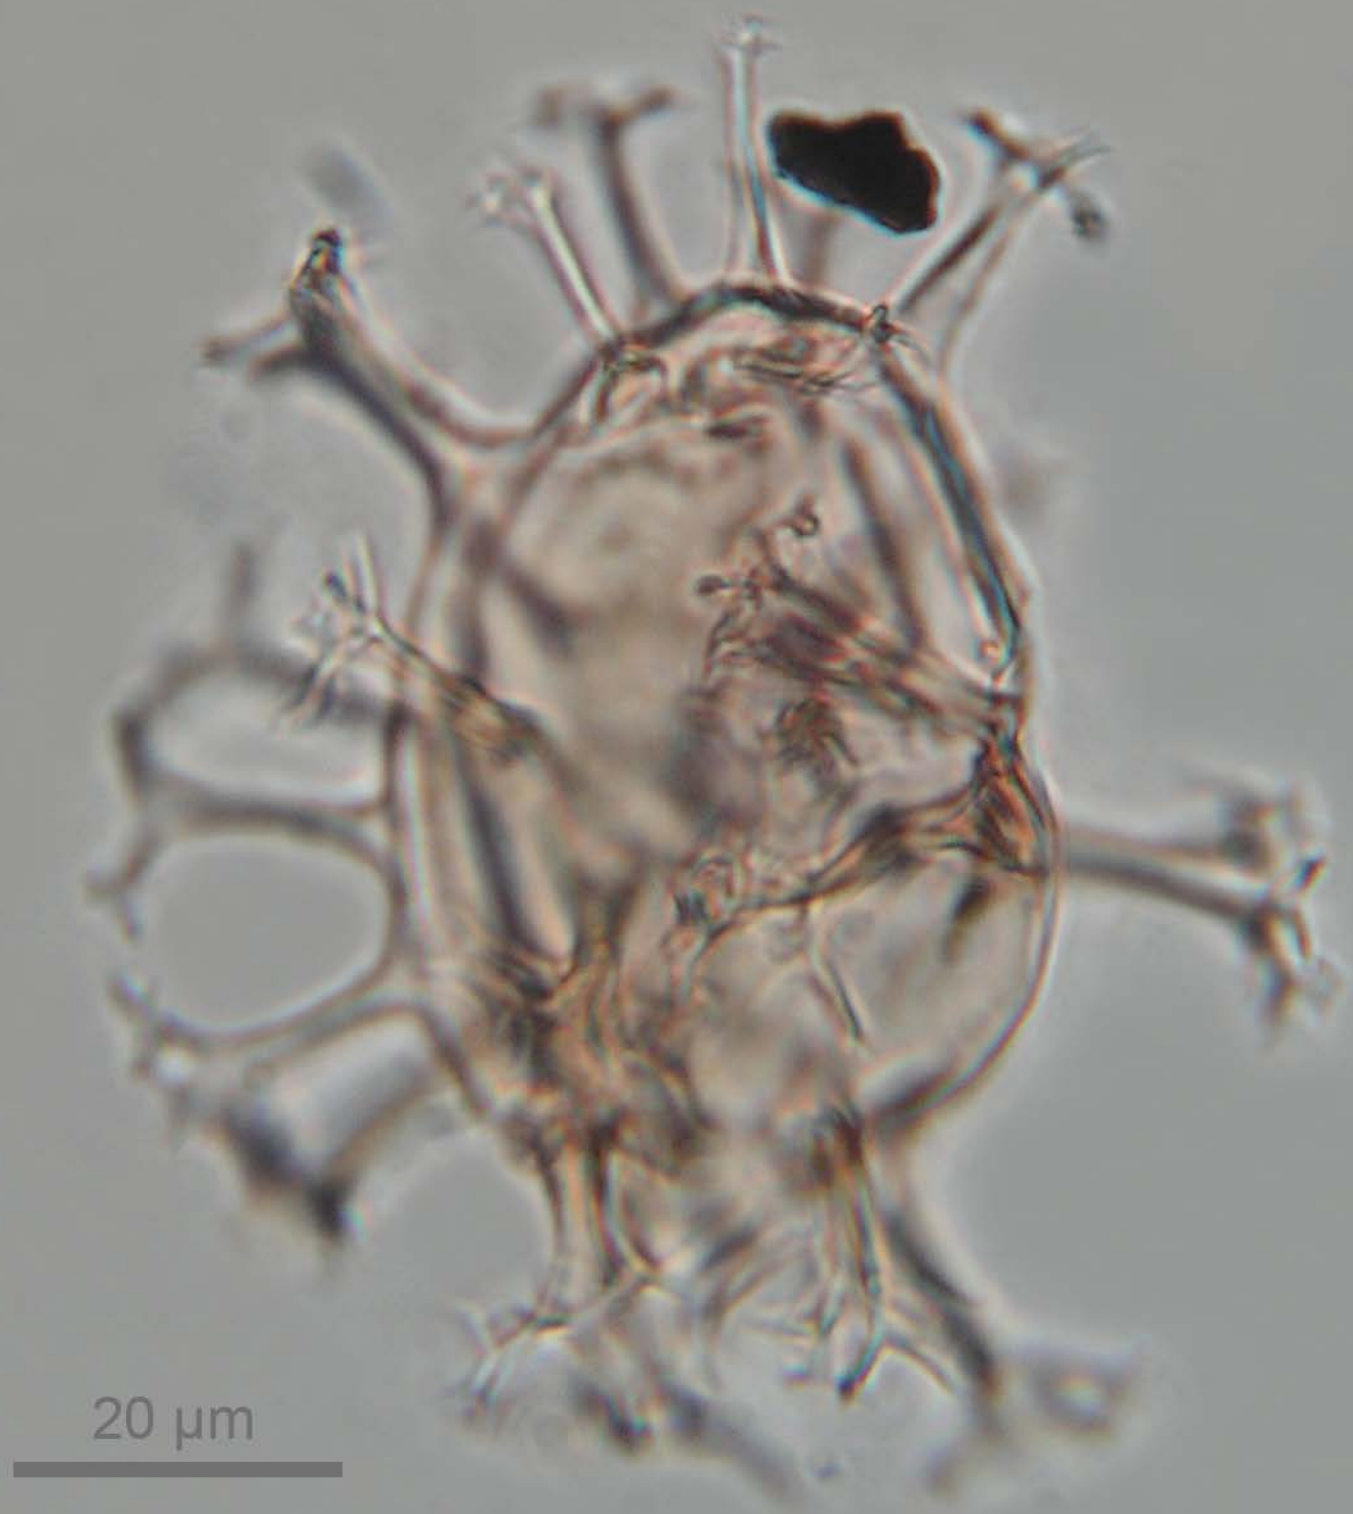

*Achomosphaera andalusiensis* Jan du Chêne 1977  
topotype

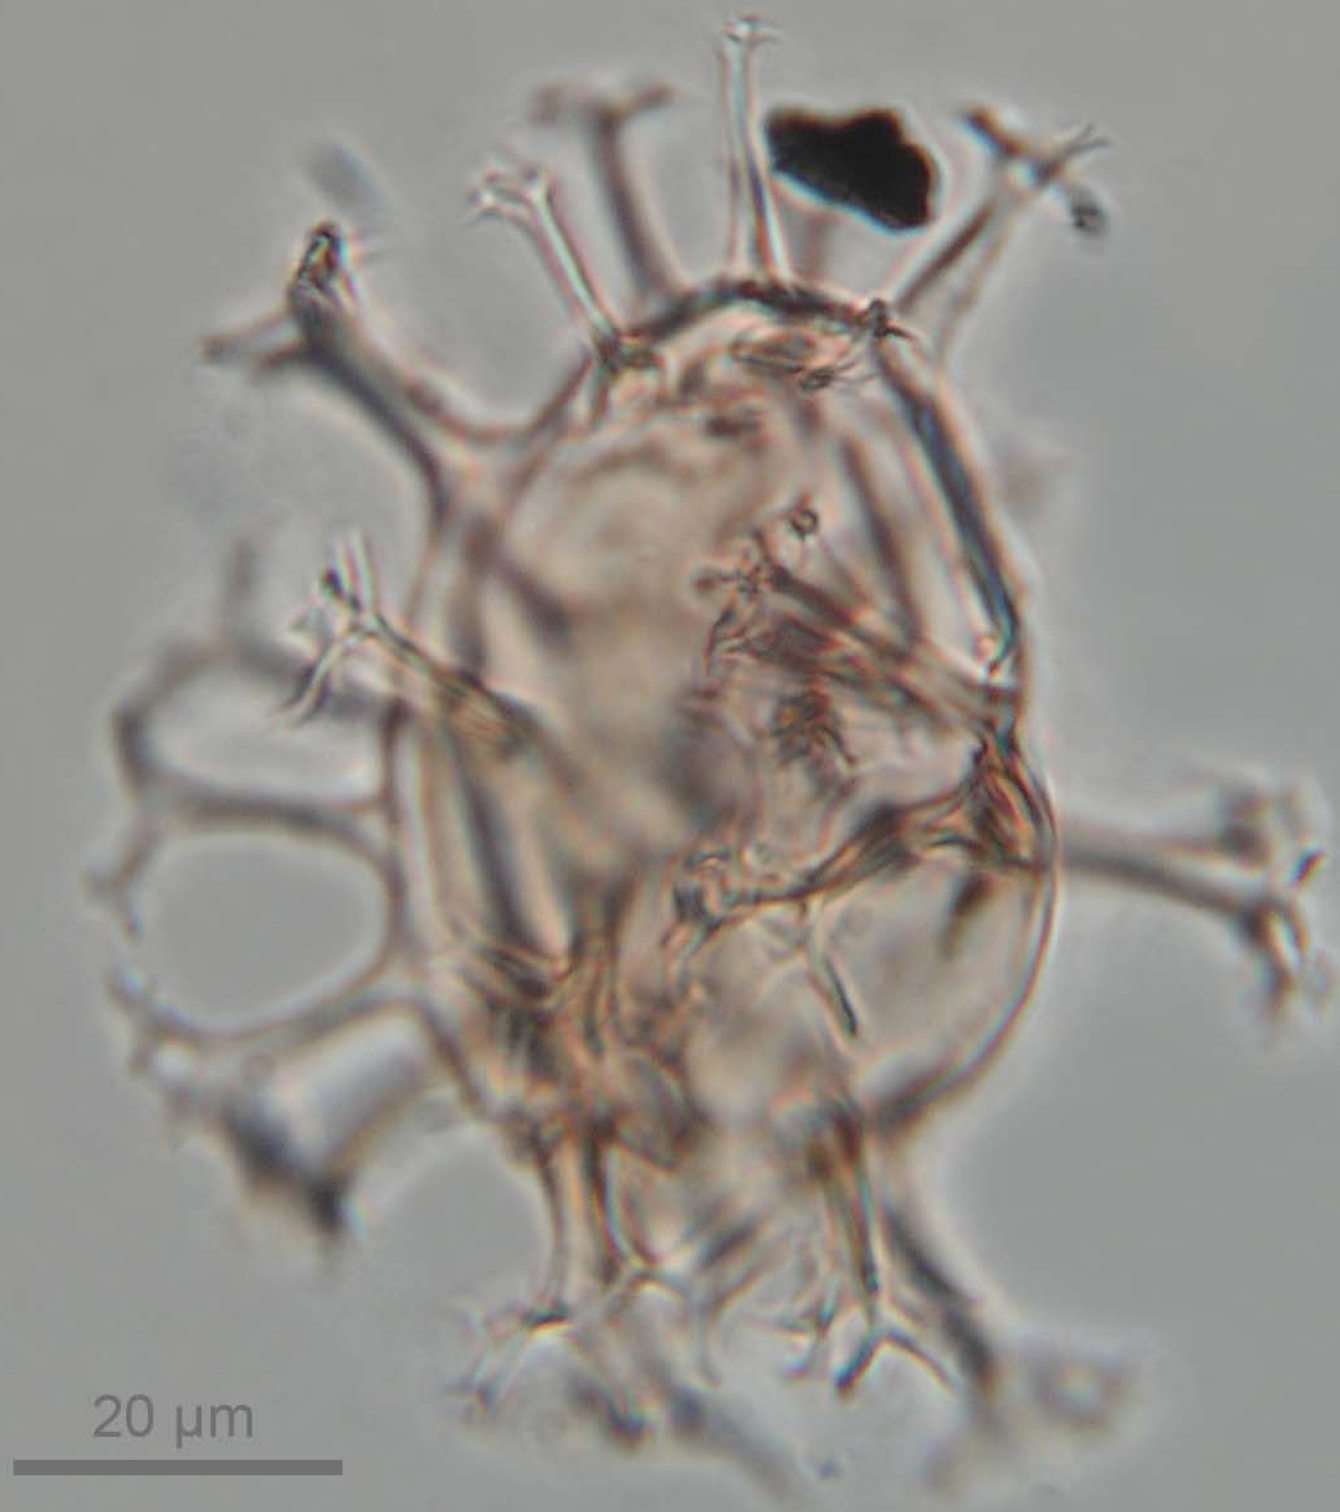

*Achomosphaera andalusiensis* Jan du Chêne 1977  
topotype

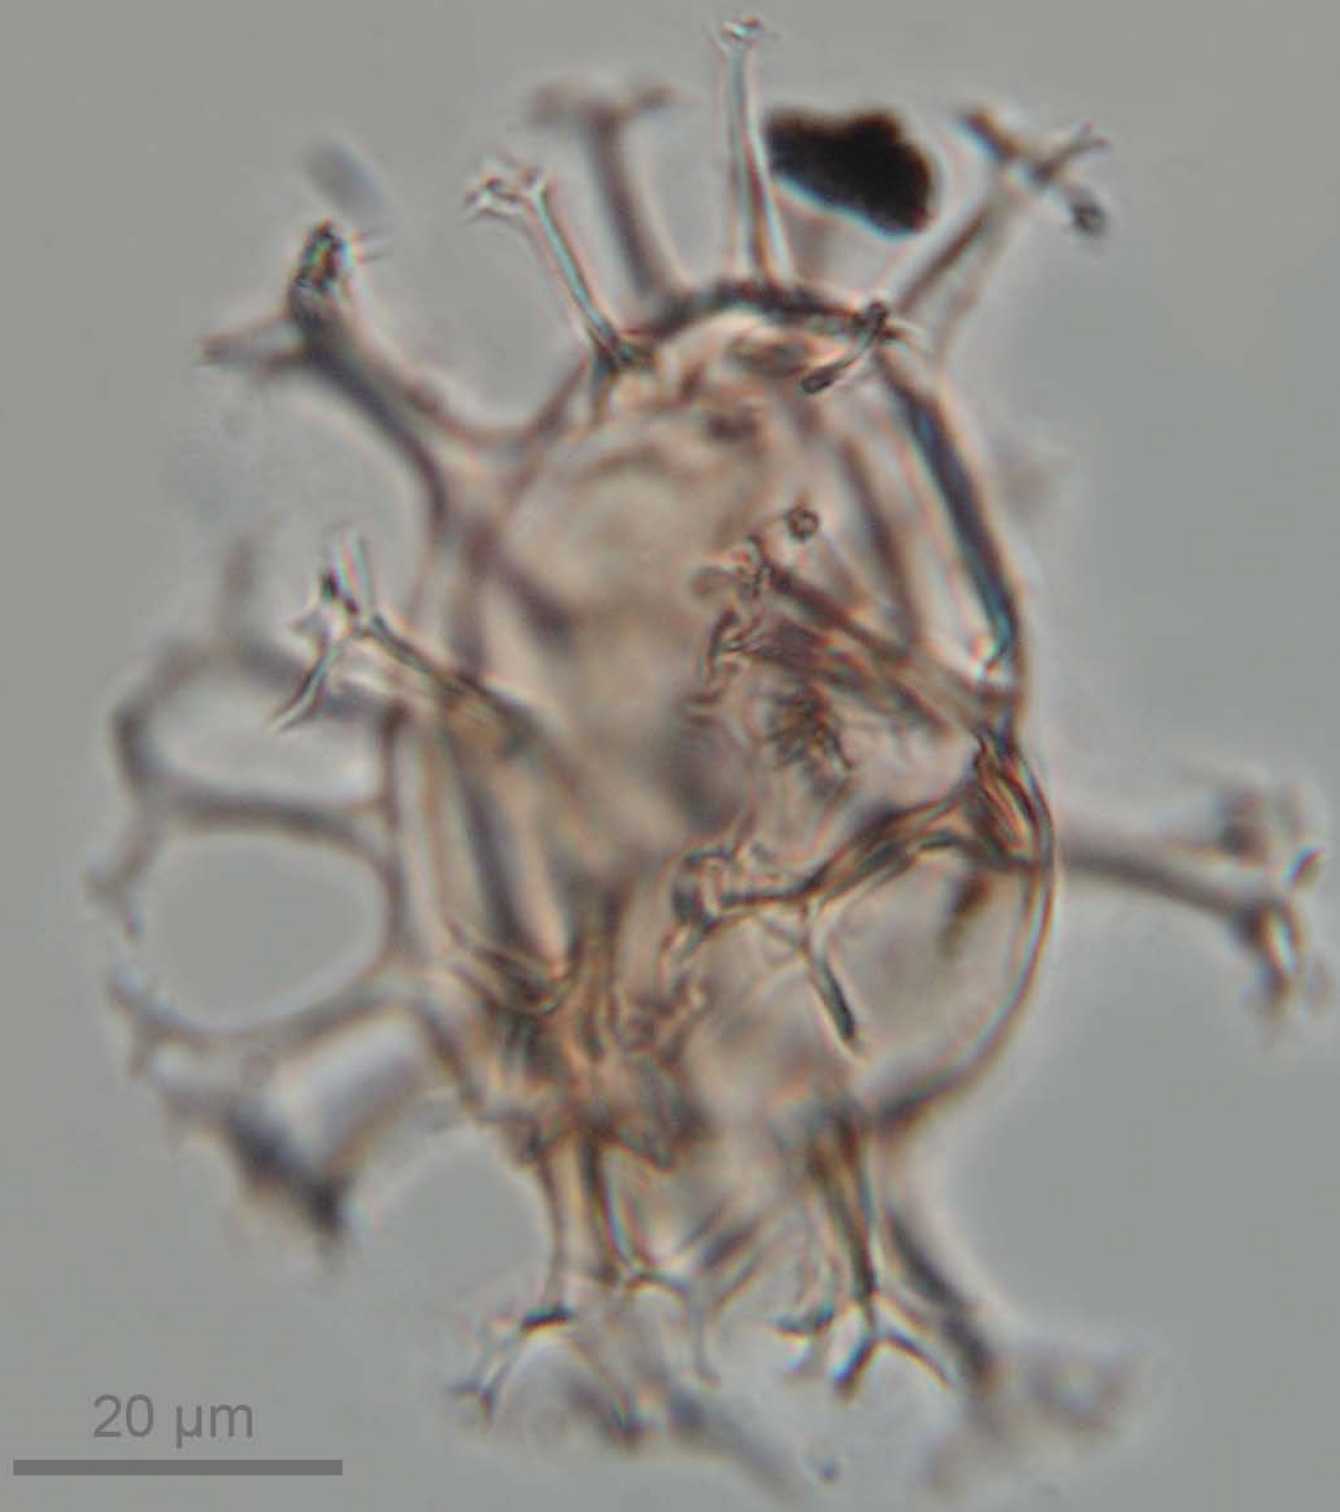

*Achomosphaera andalusiensis* Jan du Chêne 1977  
topotype



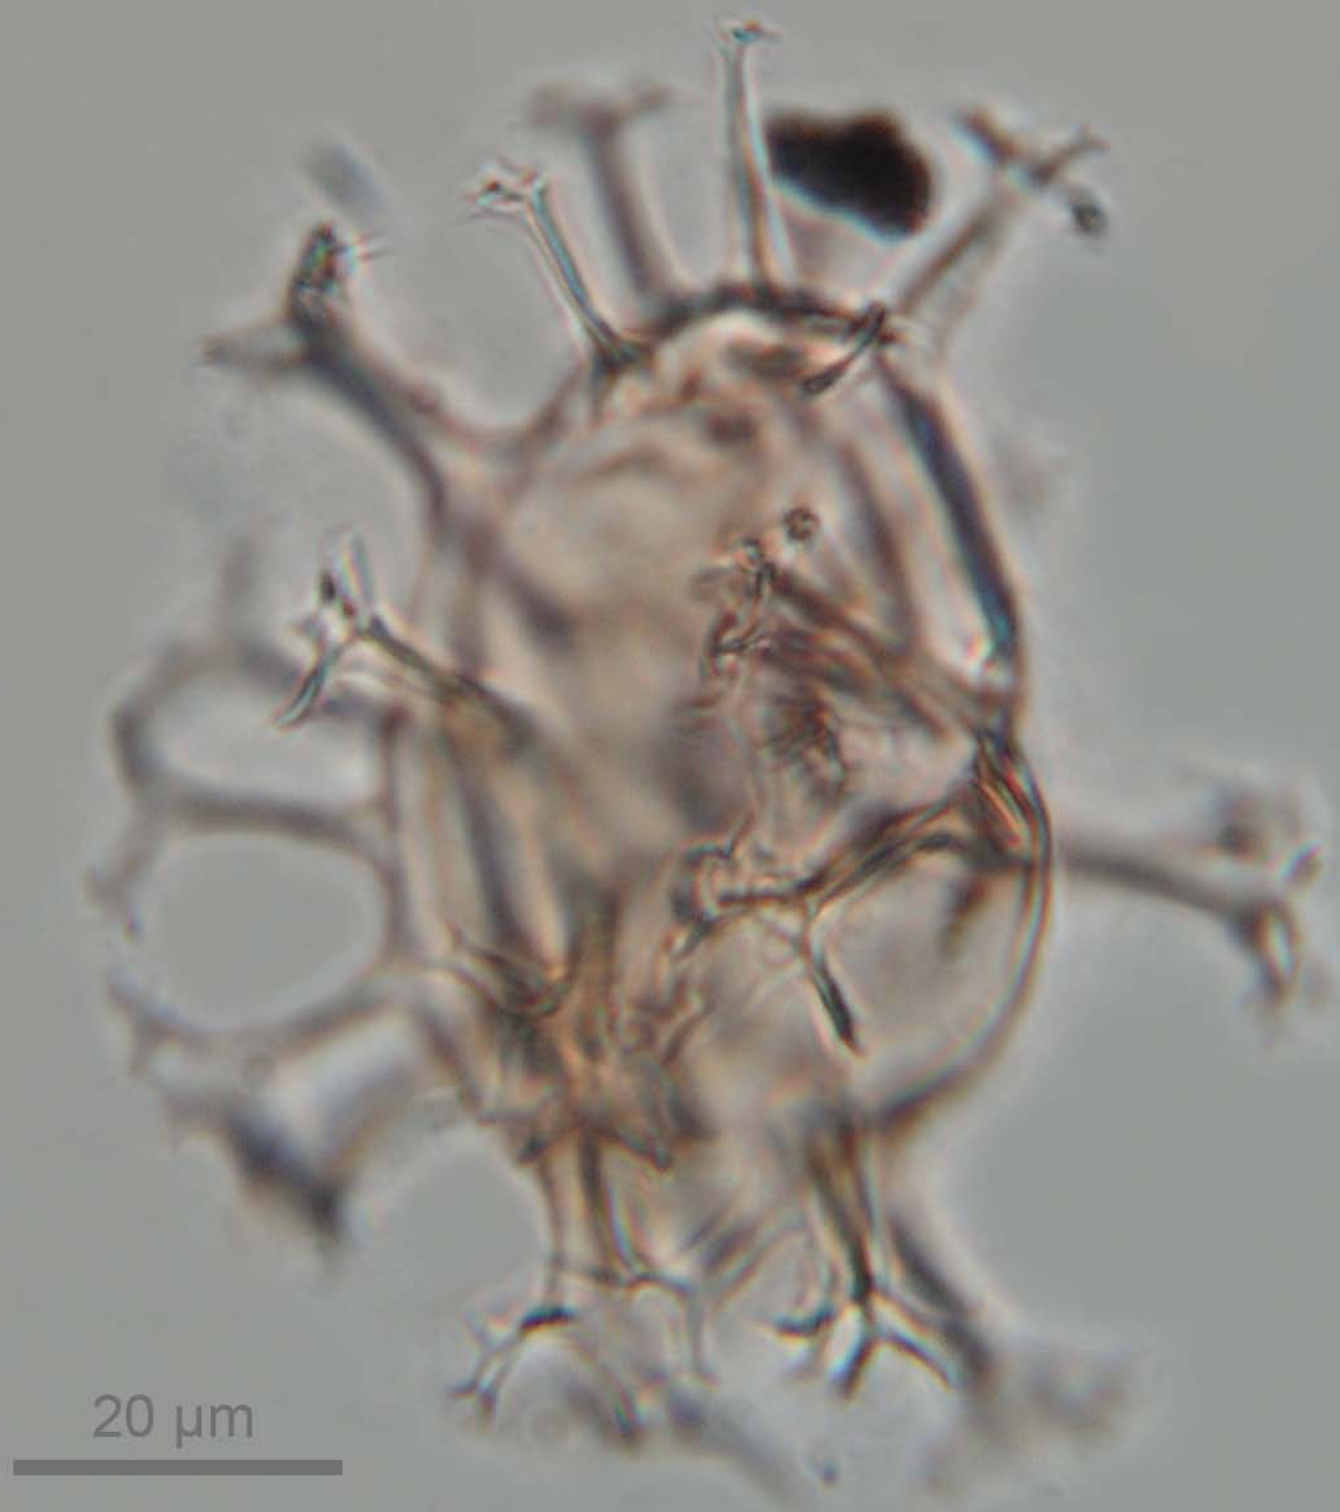

*Achomosphaera andalusiensis* Jan du Chêne 1977  
topotype

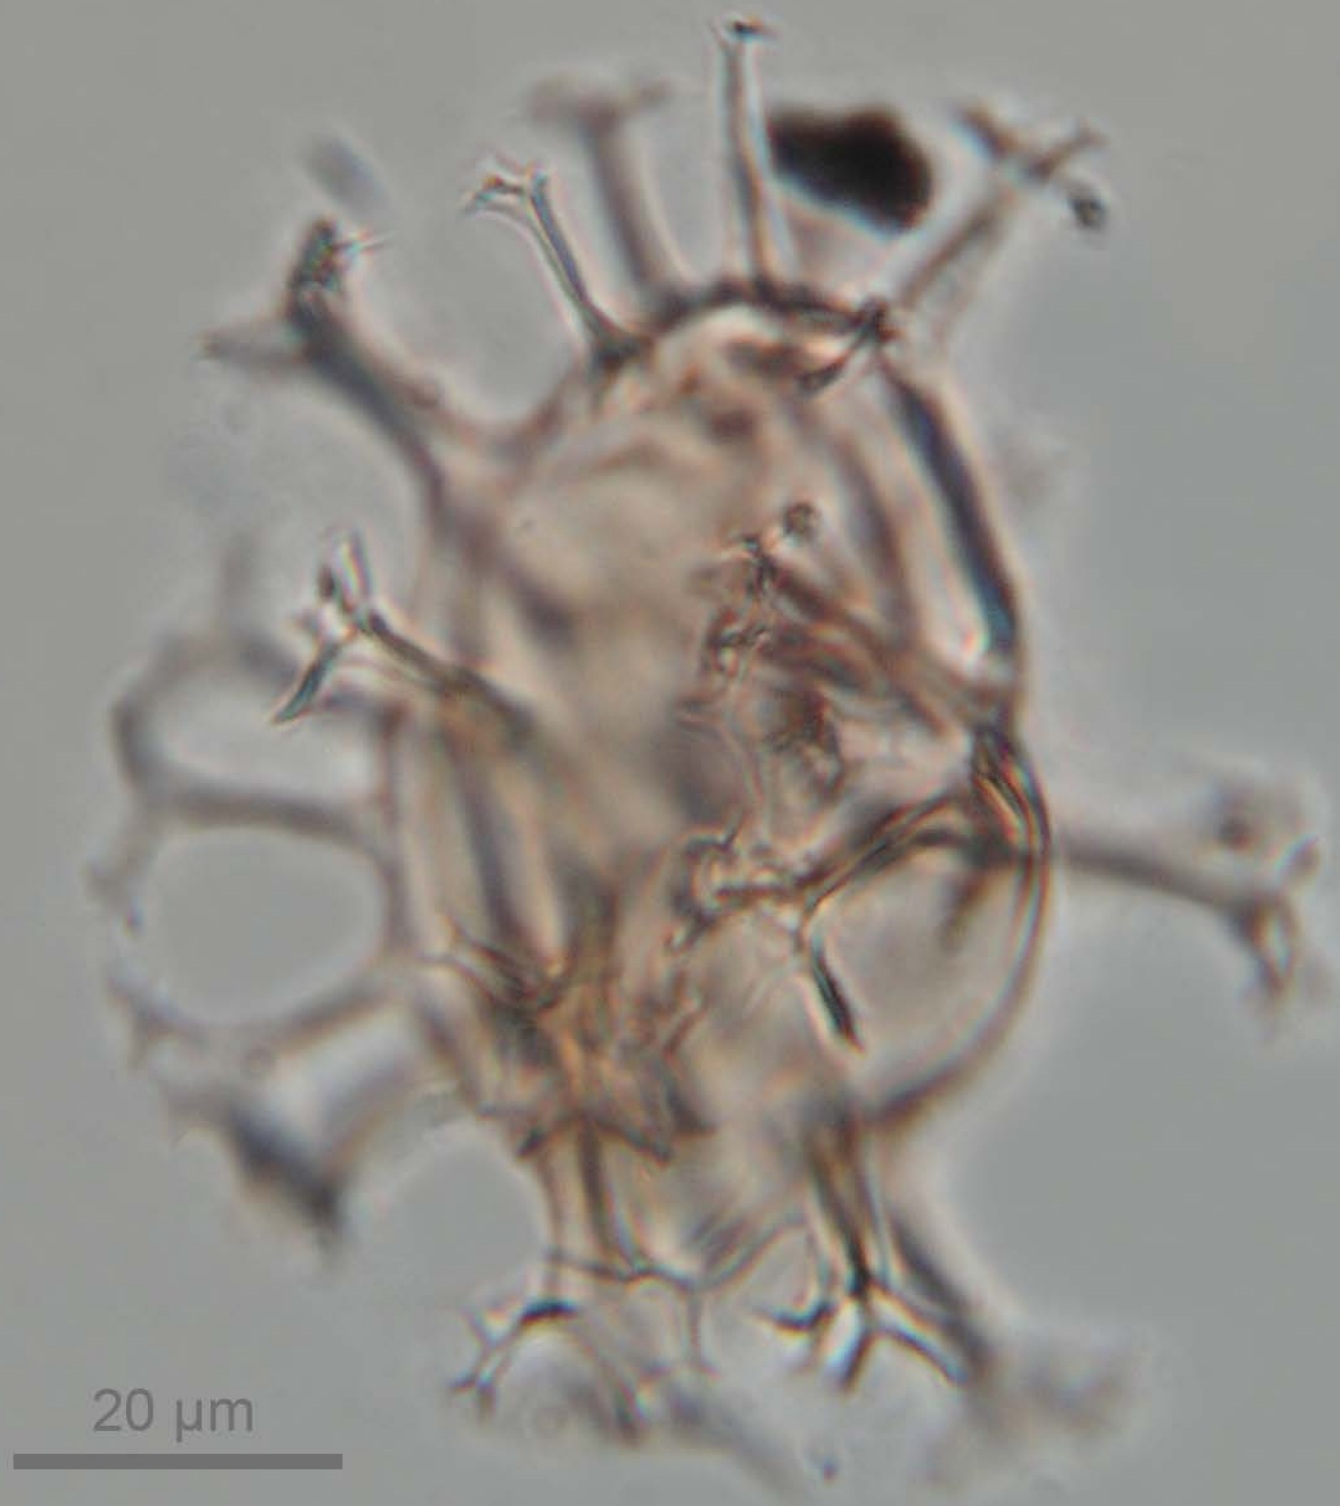

*Achomosphaera andalusiensis* Jan du Chêne 1977  
topotype

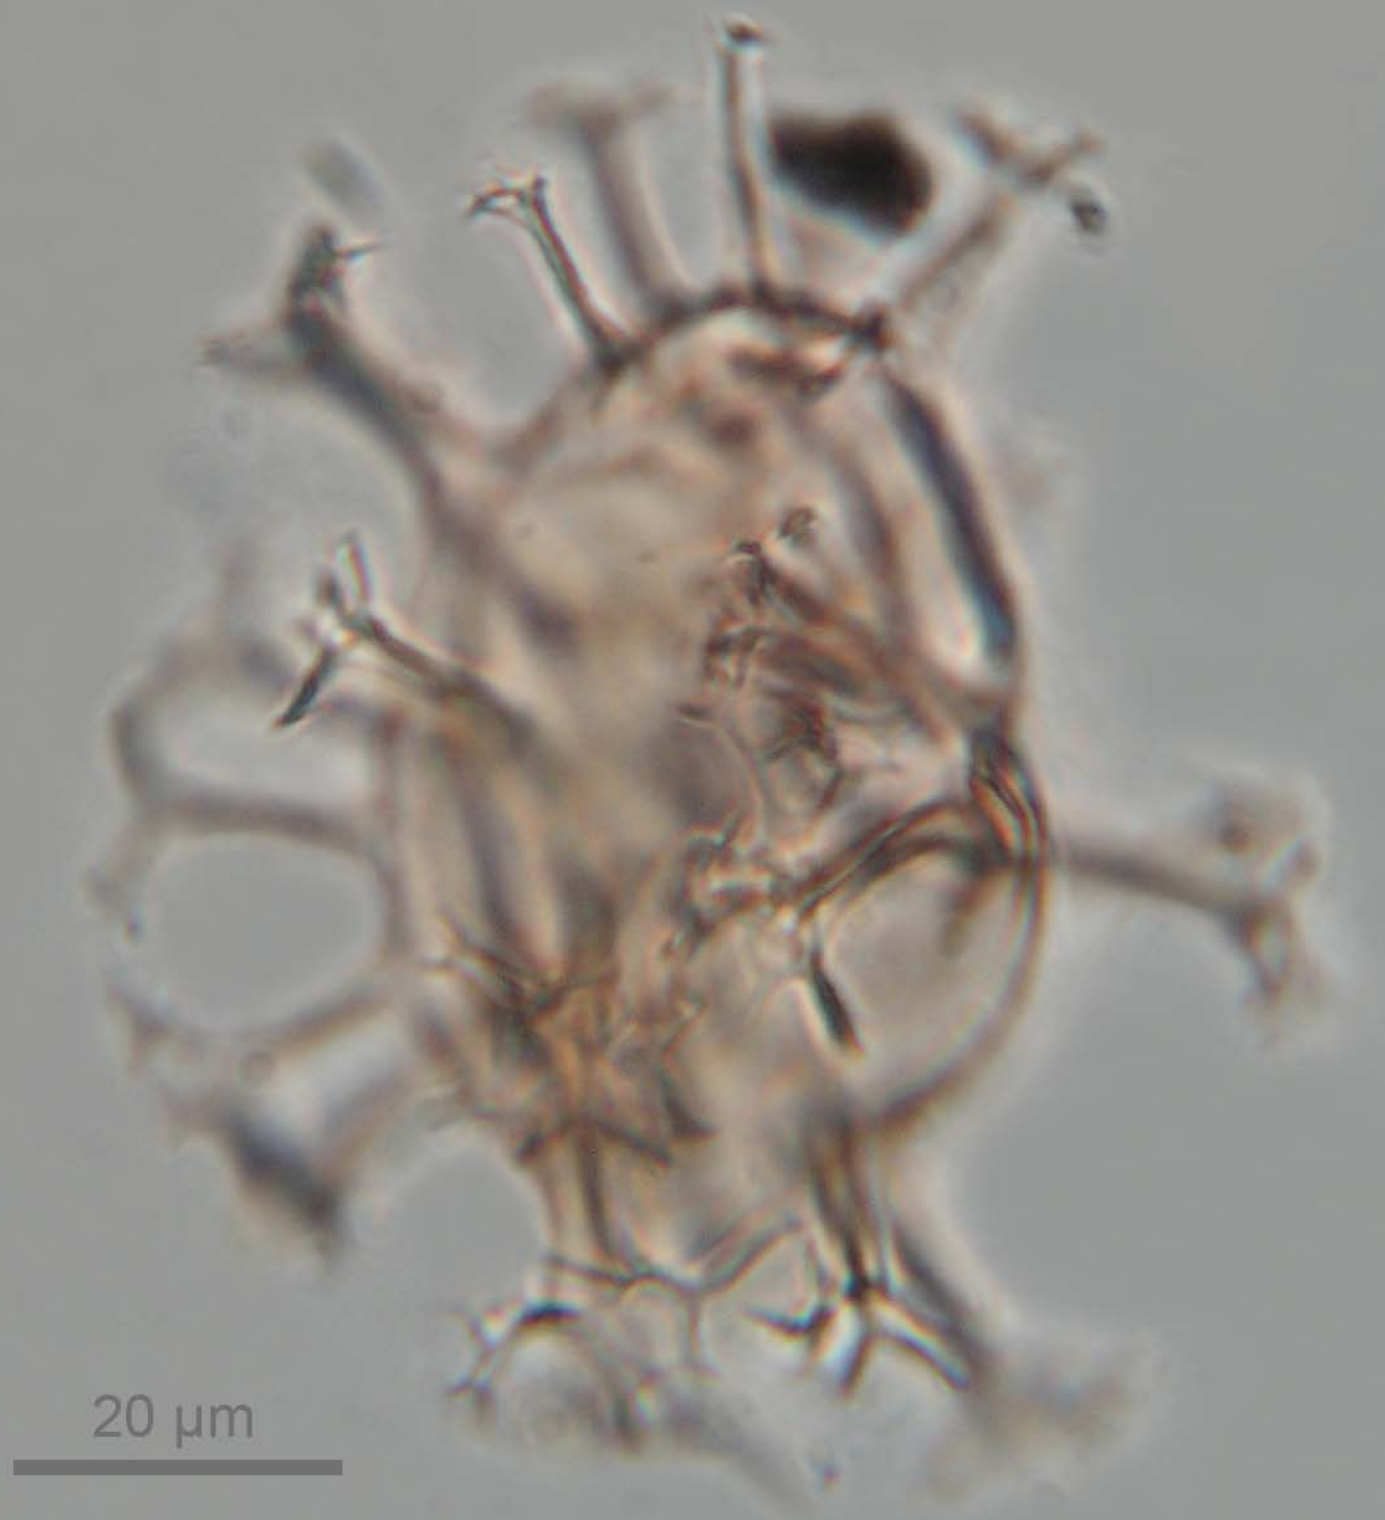

*Achomosphaera andalusiensis* Jan du Chêne 1977  
topotype



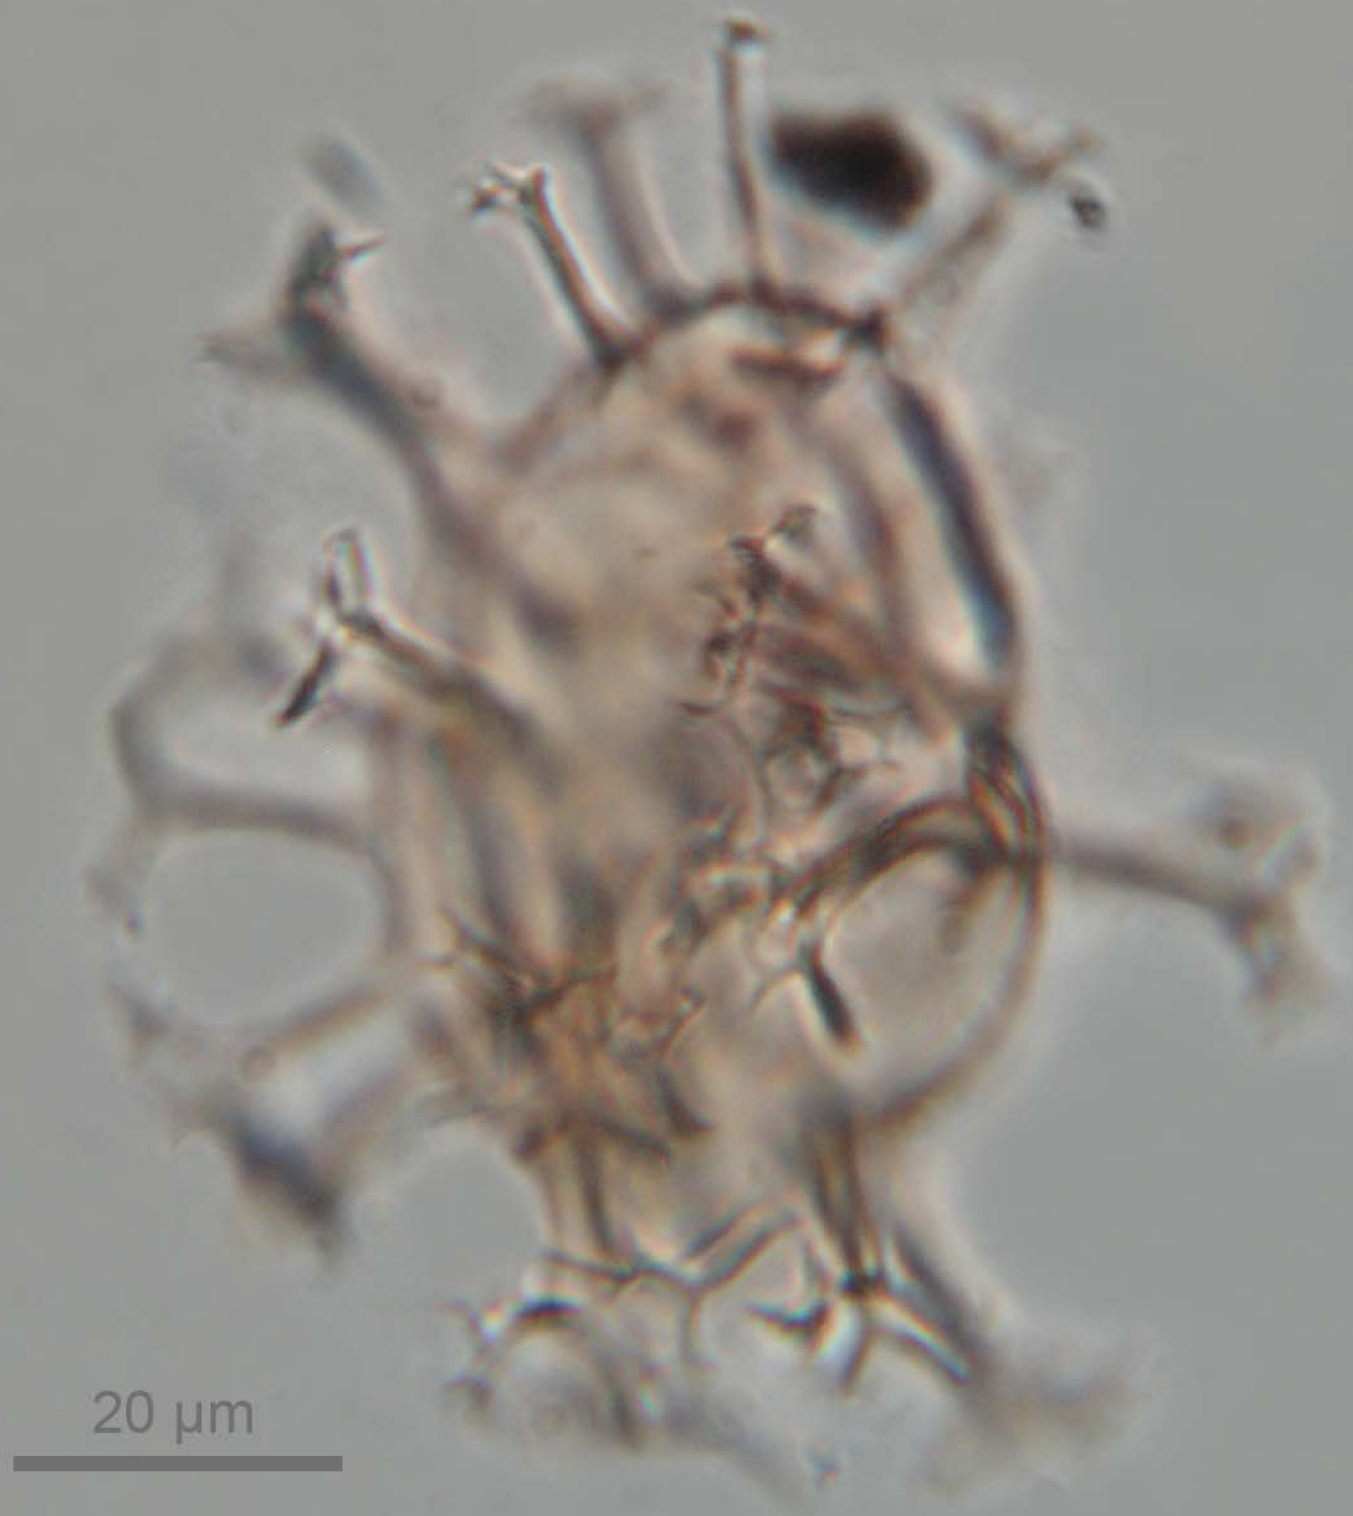

*Achomosphaera andalusiensis* Jan du Chêne 1977  
topotype

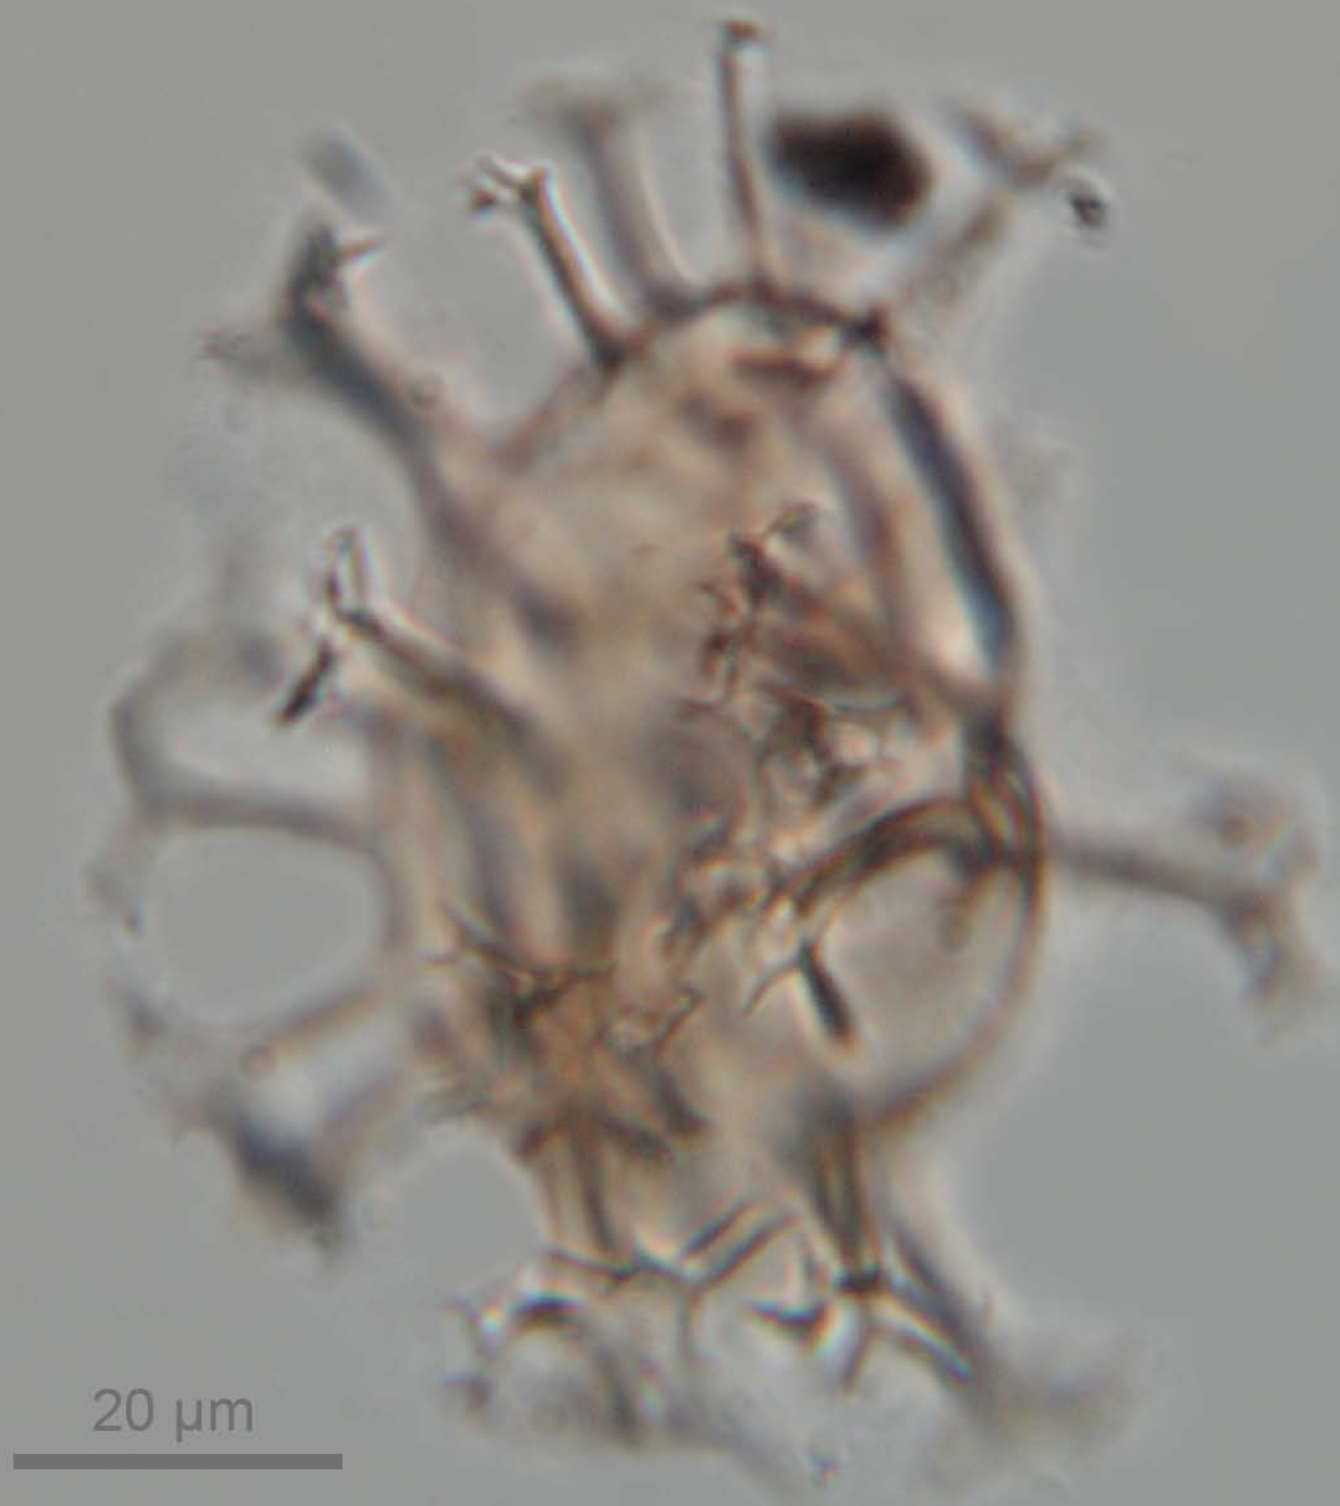

*Achomosphaera andalusiensis* Jan du Chêne 1977  
topotype
