# Supplementary material
Source: publisher figshare collection journal article supplement (https://tandf.figshare.com/articles/dataset/_/7466618)
Supplement: Supplementary file 8 [file 1]

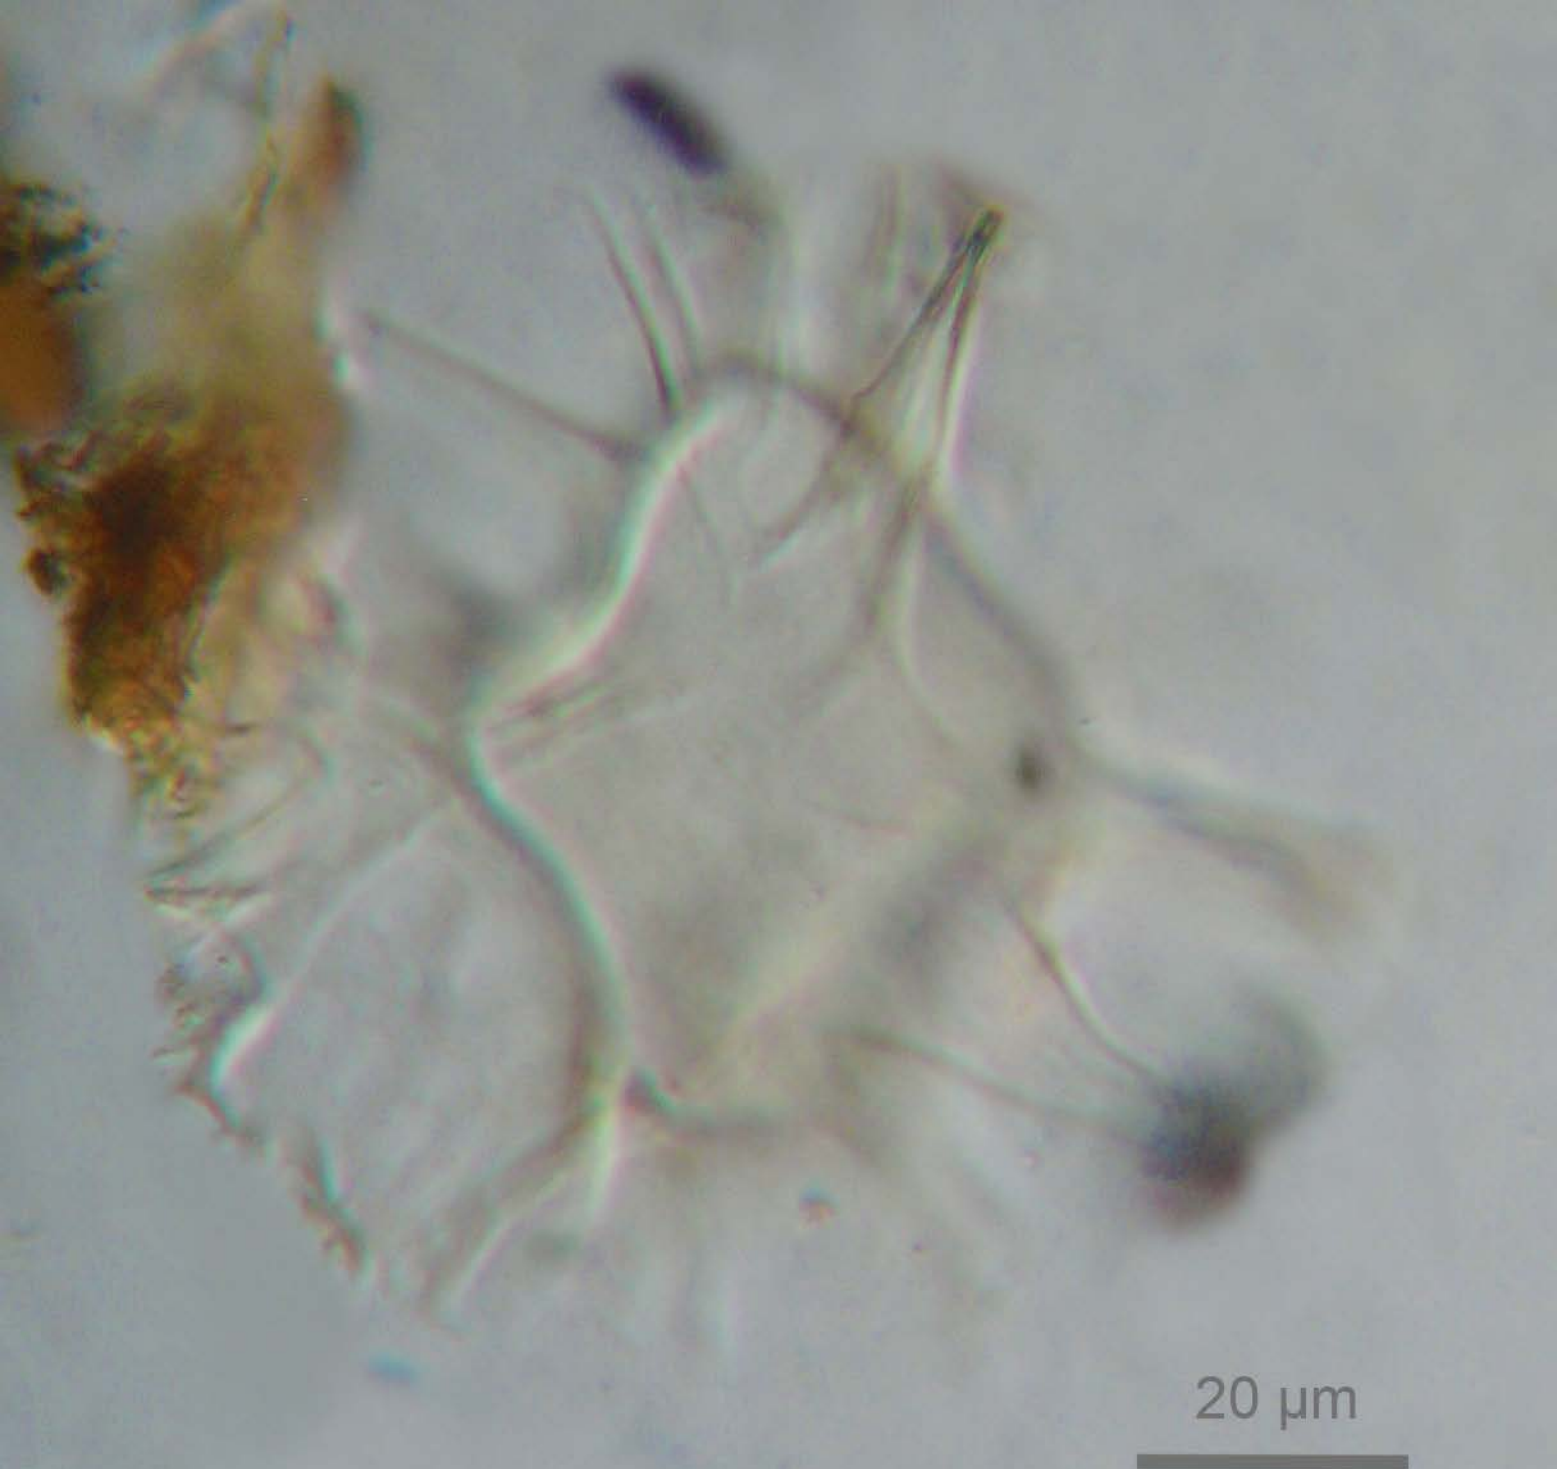

*Spiniferites cruciformis* Wall & Dale 1973 : Marmara Sea

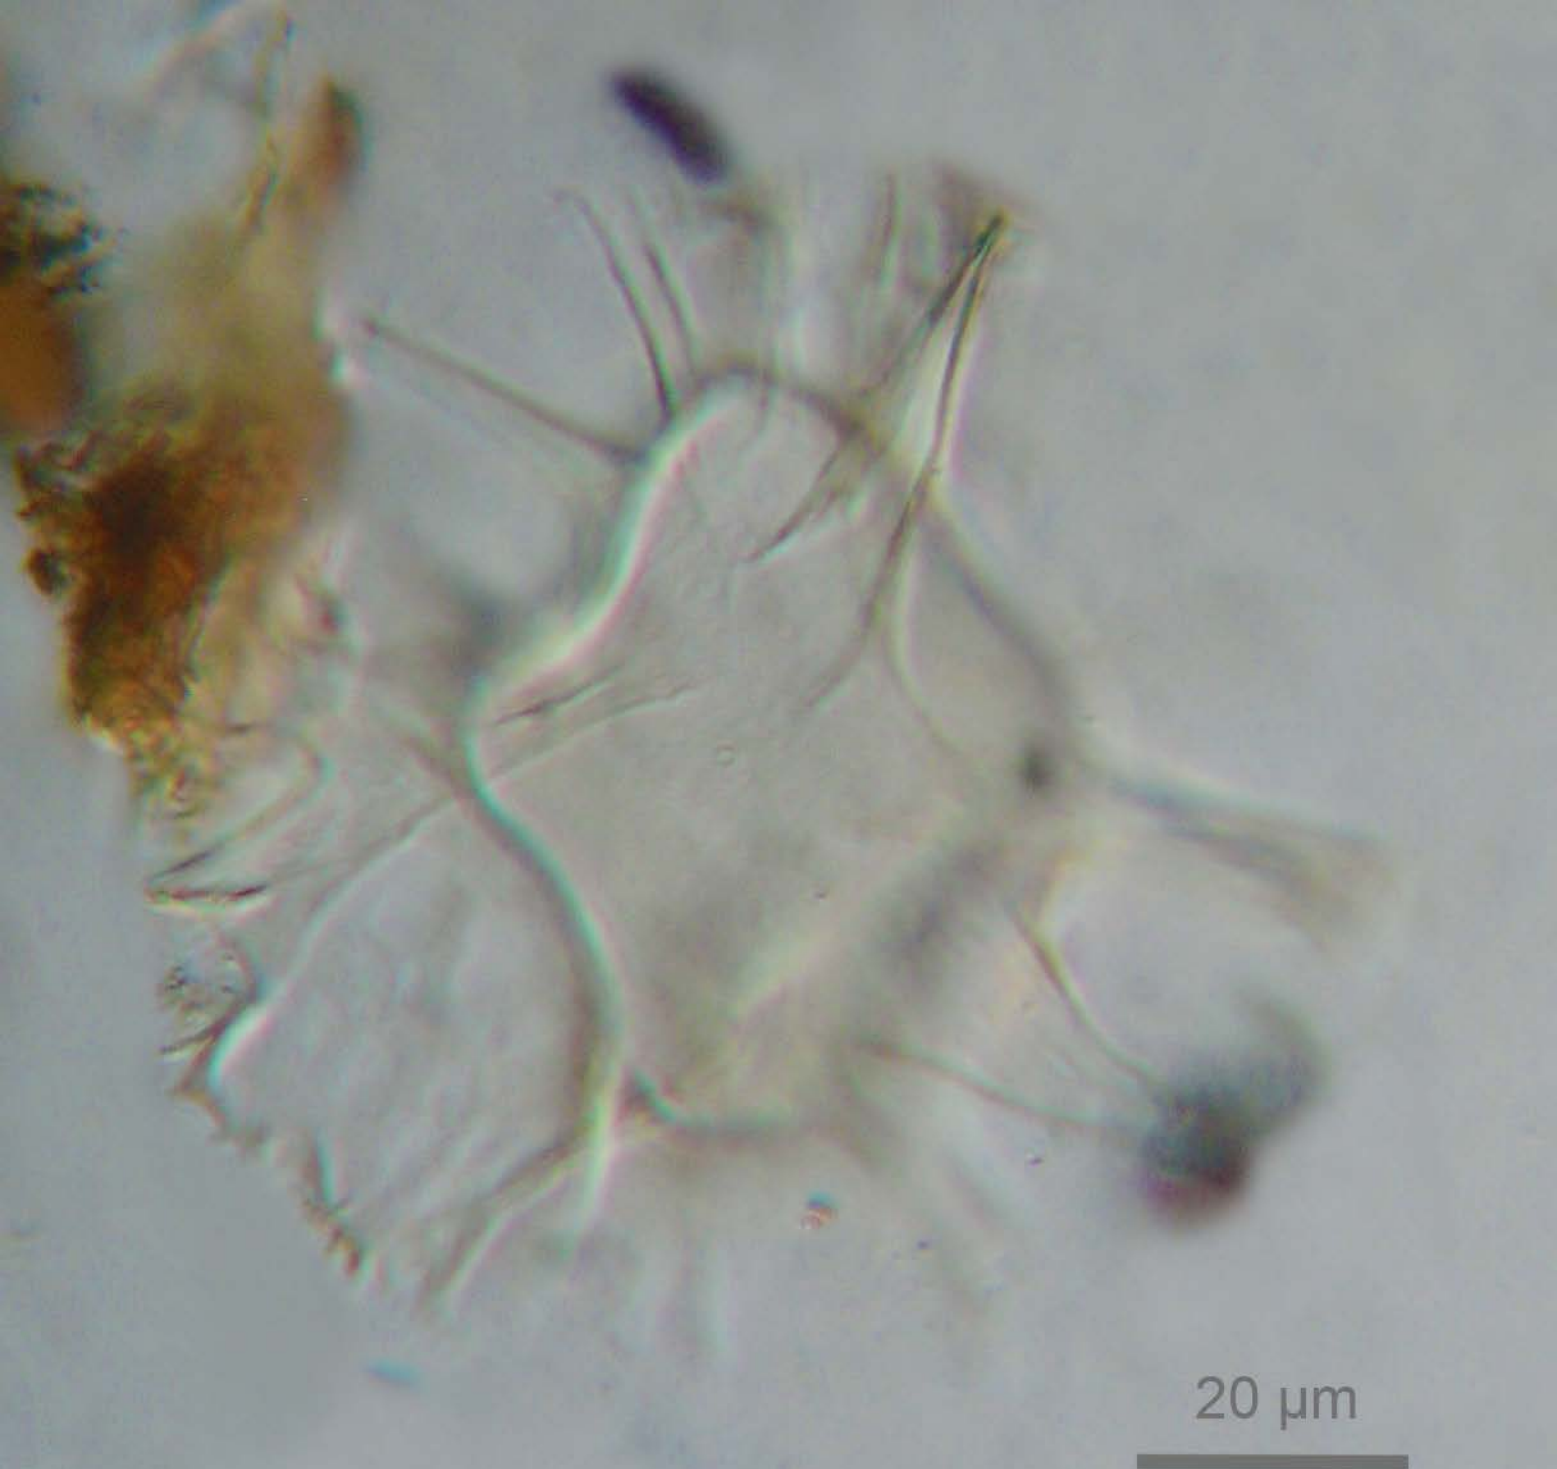

*Spiniferites cruciformis* Wall & Dale 1973 : Marmara Sea

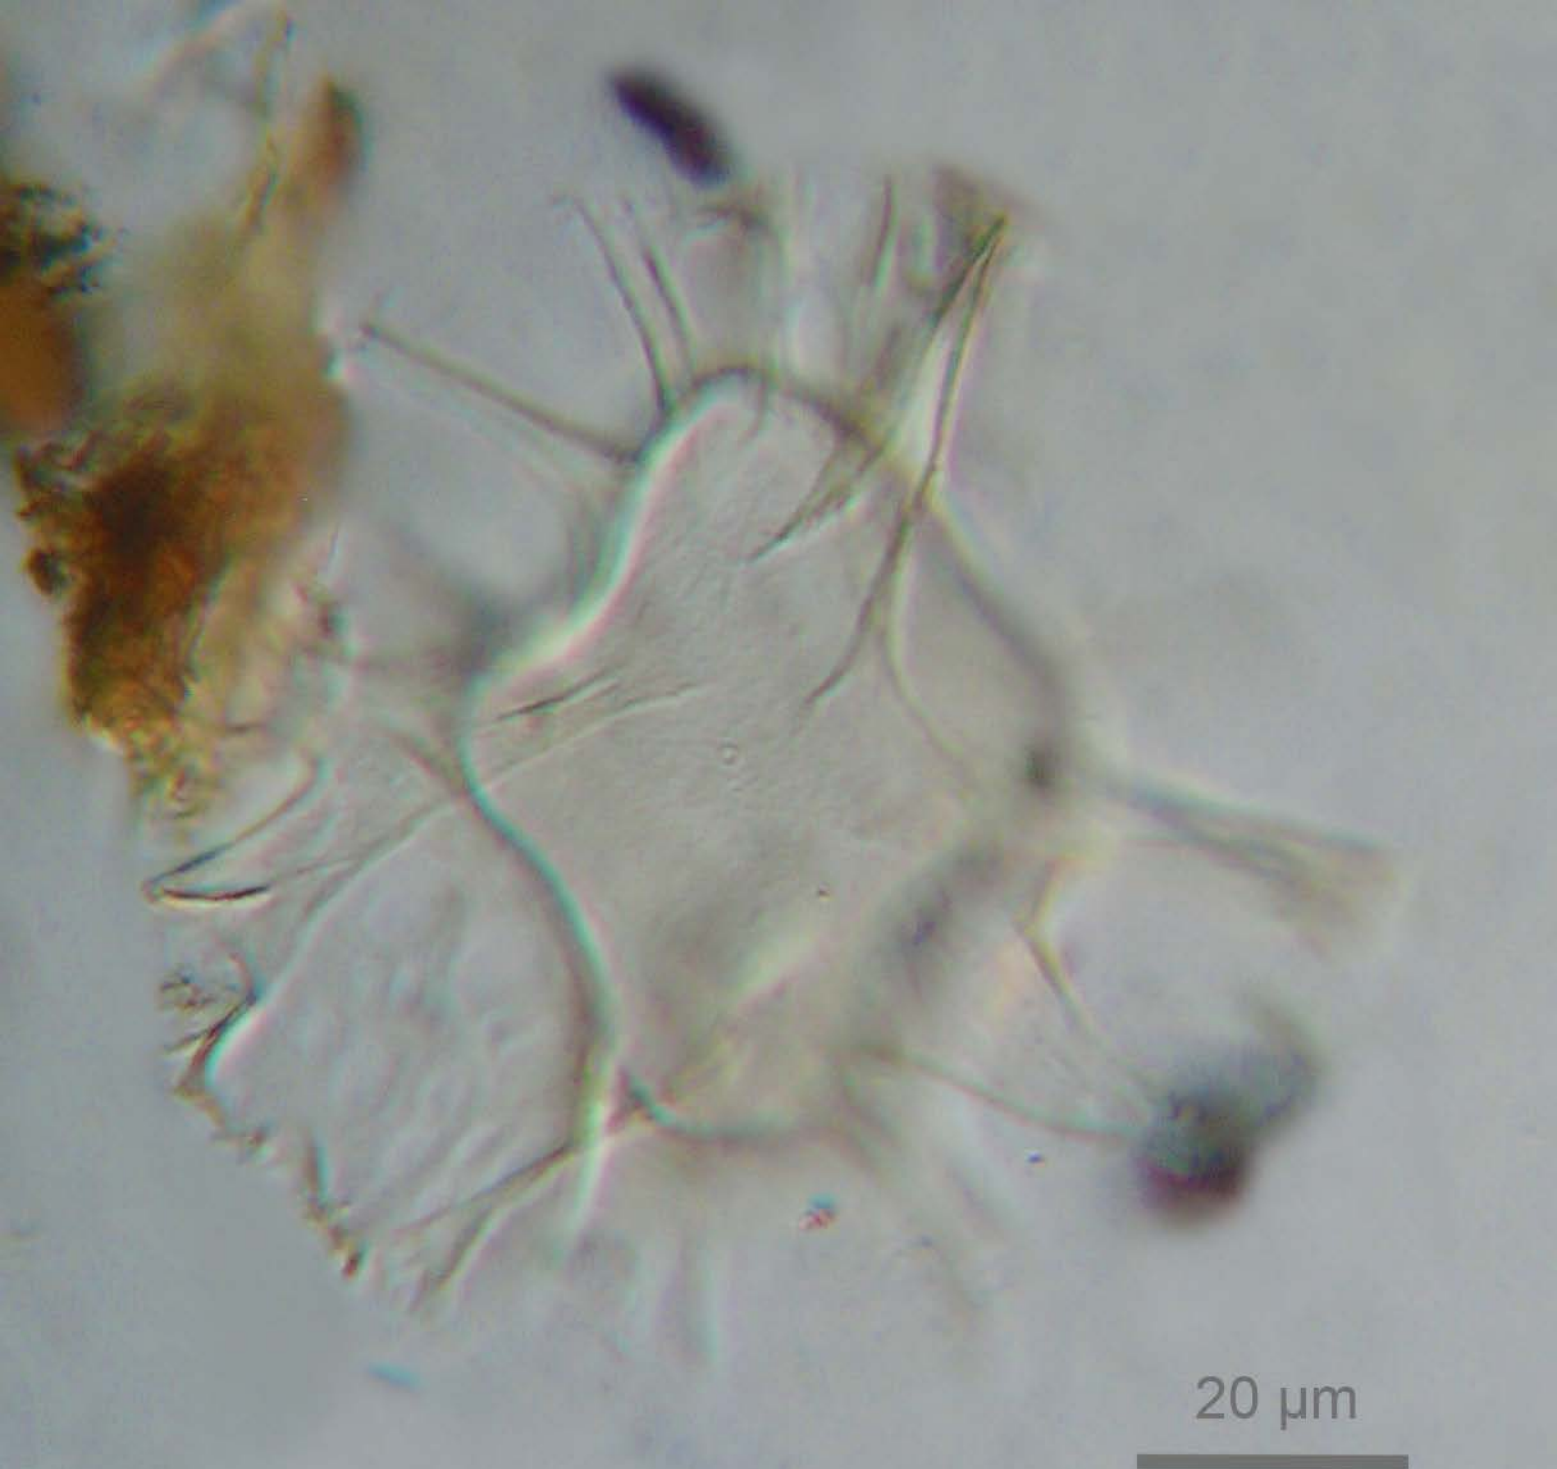

*Spiniferites cruciformis* Wall & Dale 1973 : Marmara Sea



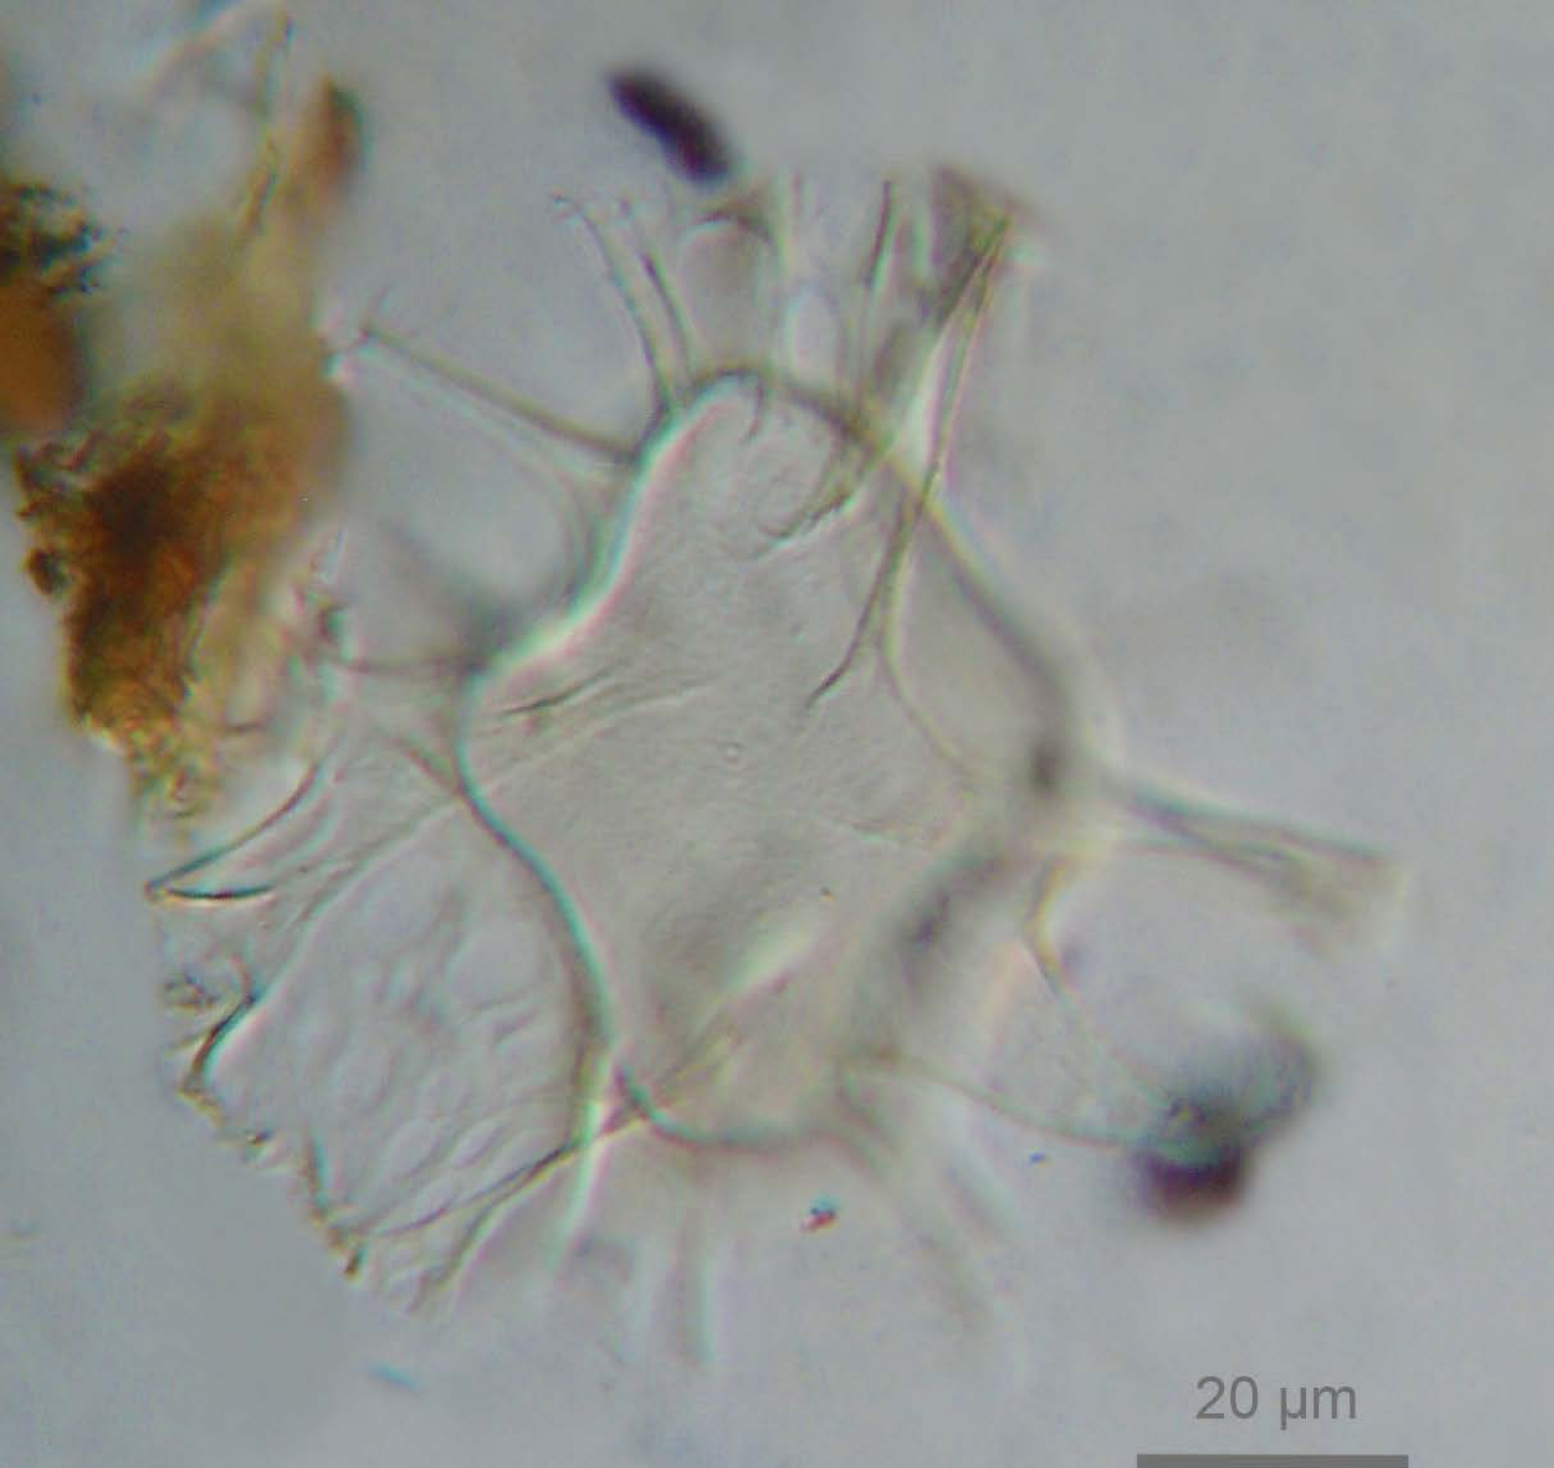

*Spiniferites cruciformis* Wall & Dale 1973 : Marmara Sea

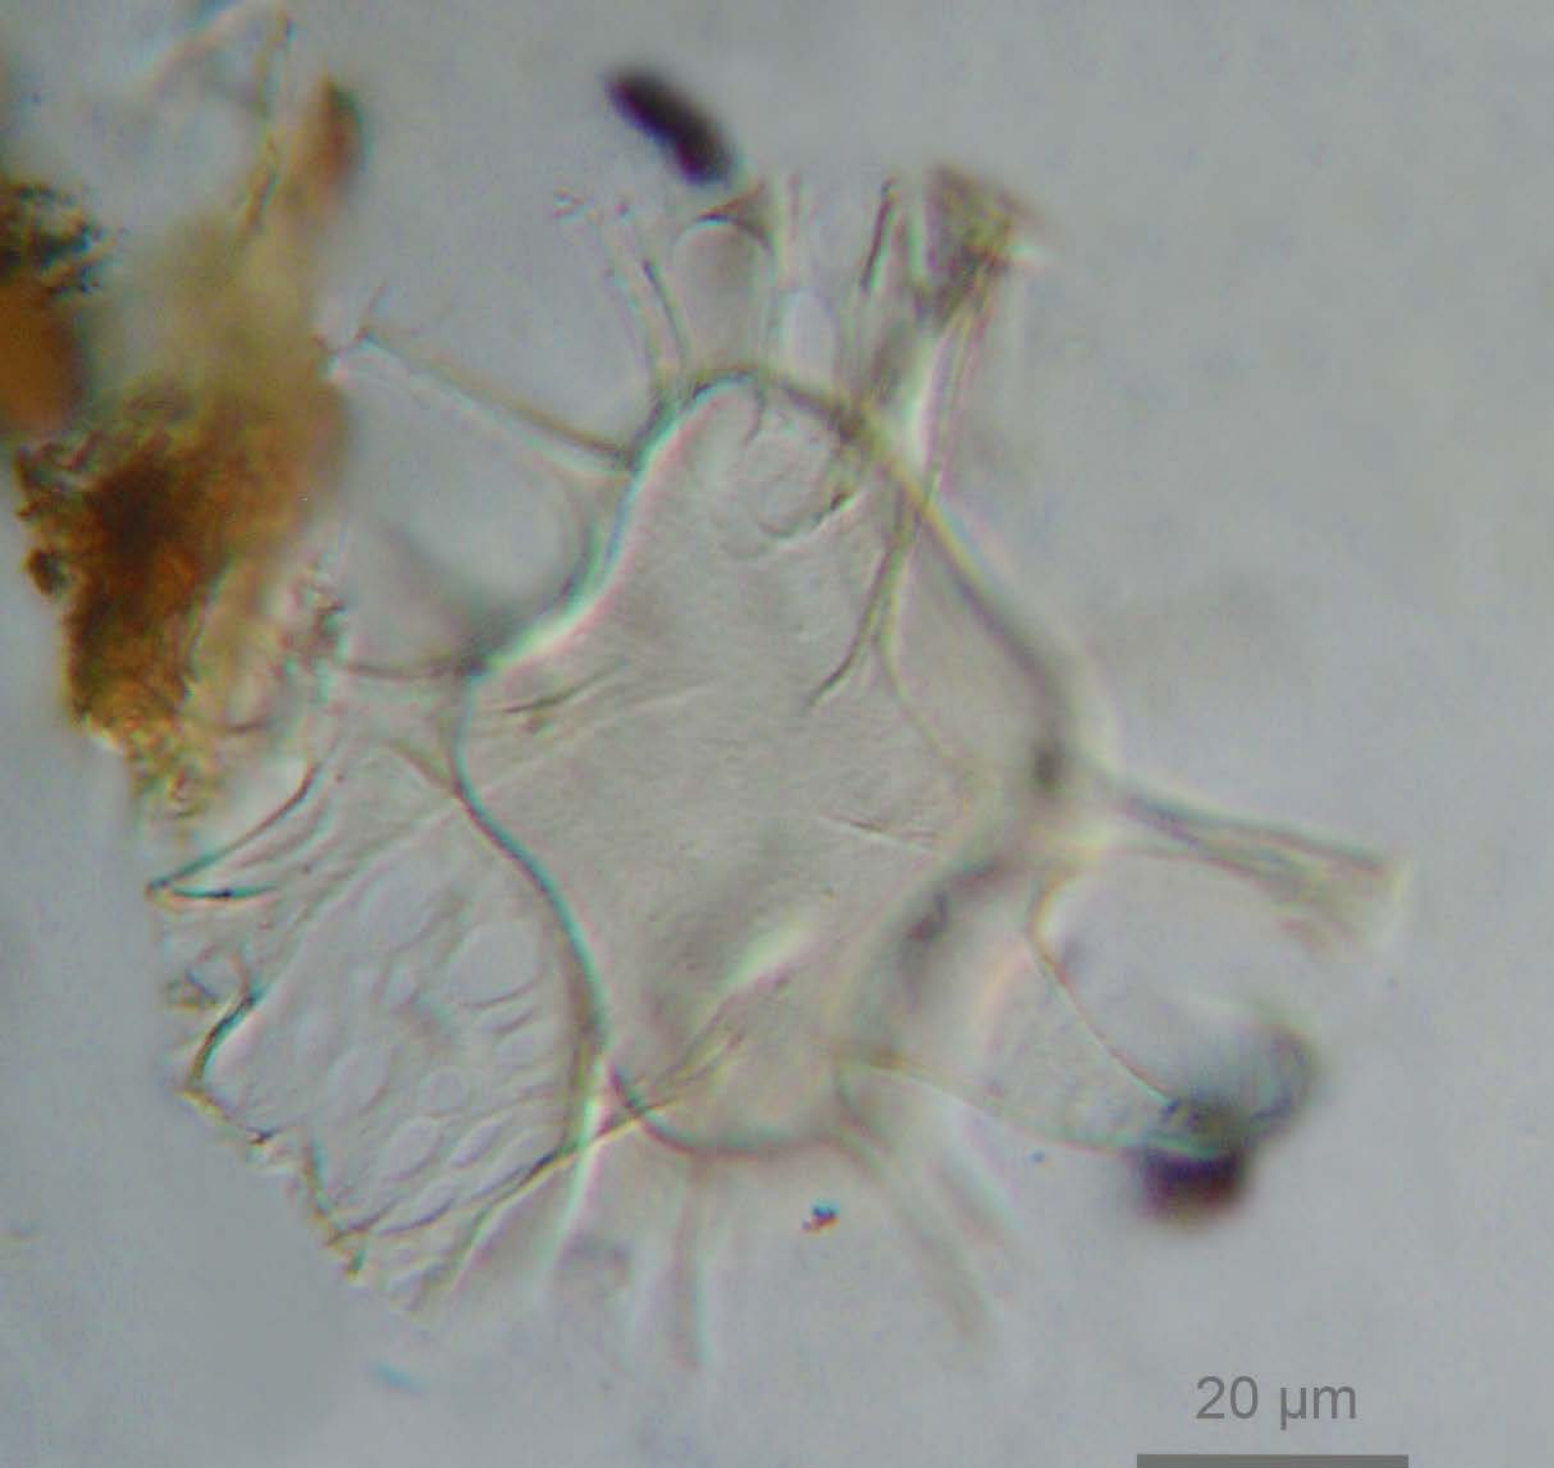

*Spiniferites cruciformis* Wall & Dale 1973 : Marmara Sea

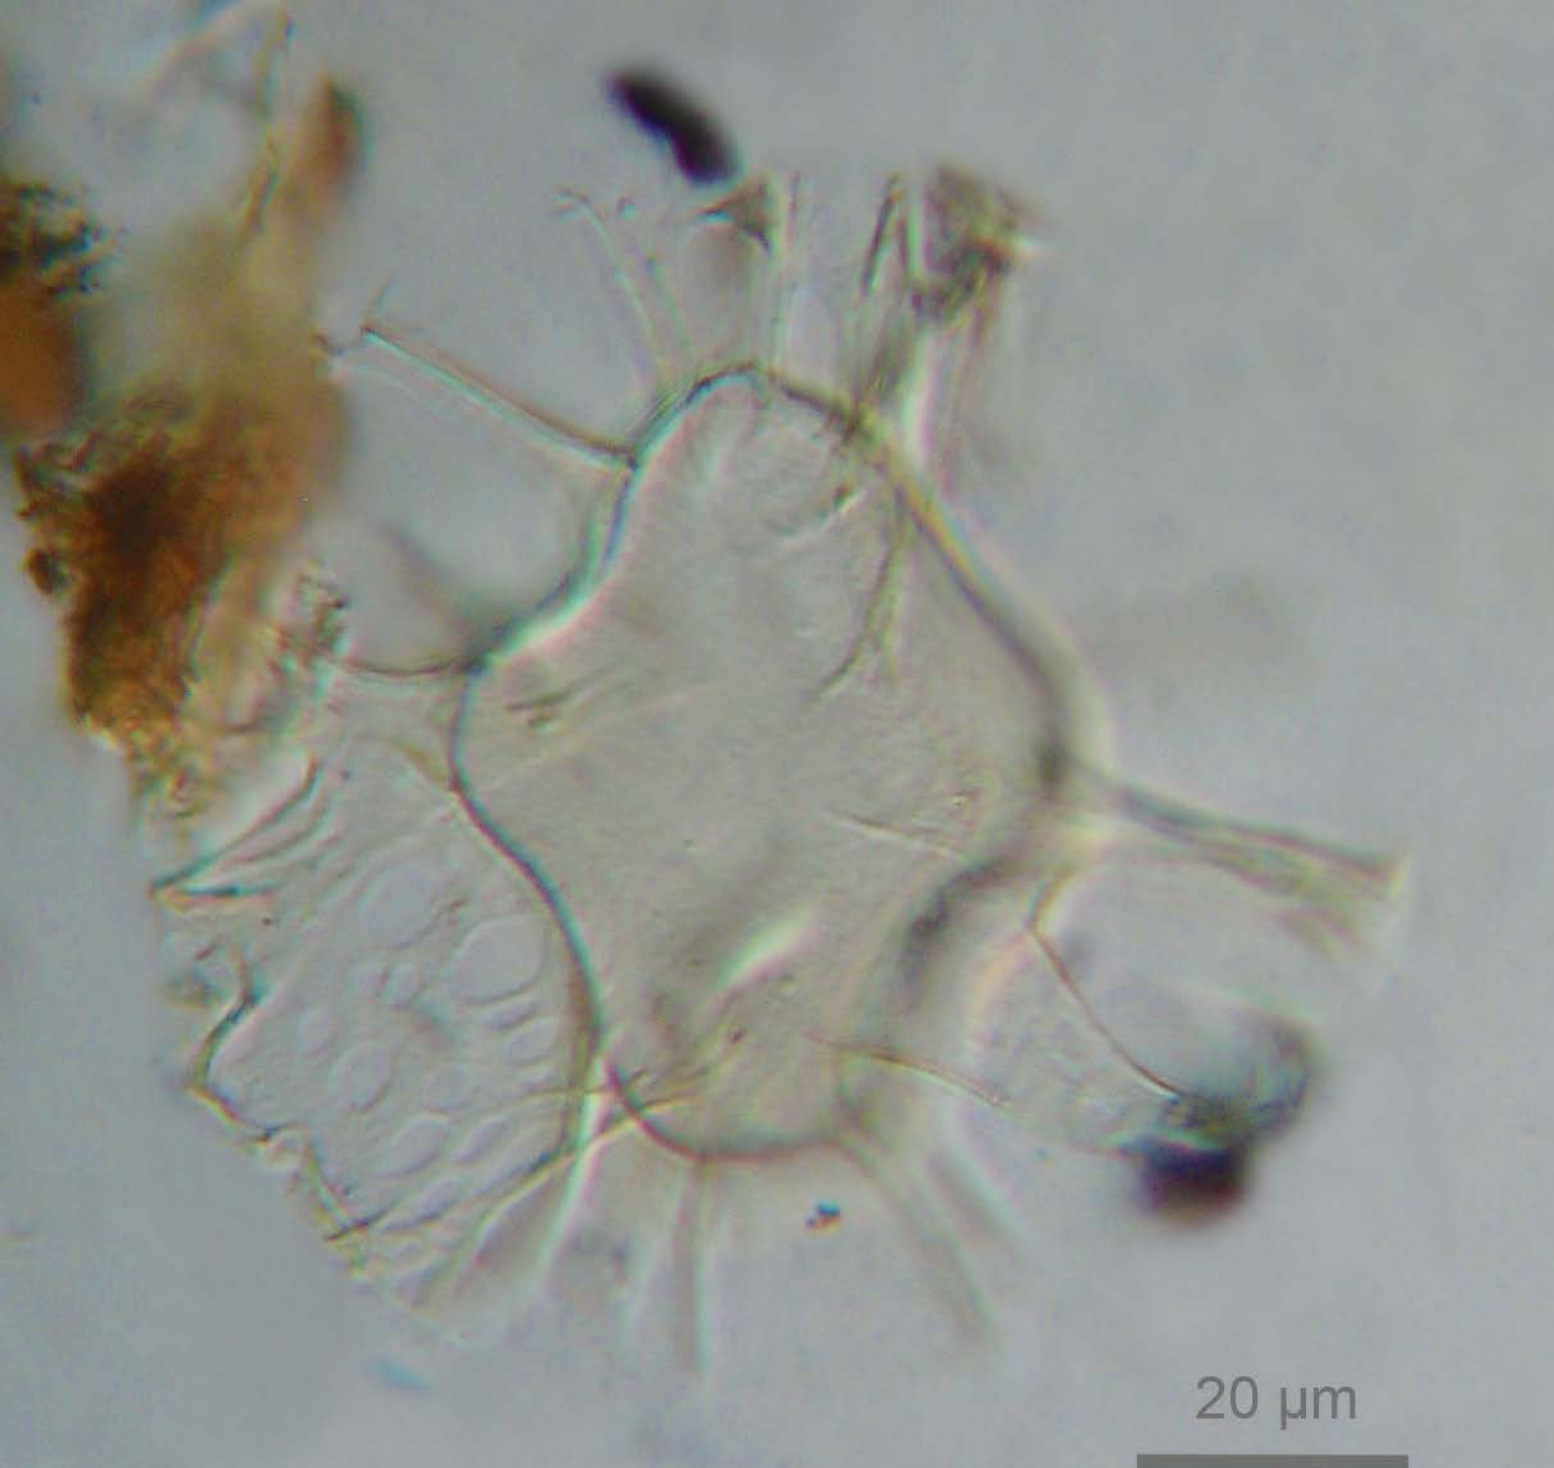

*Spiniferites cruciformis* Wall & Dale 1973 : Marmara Sea



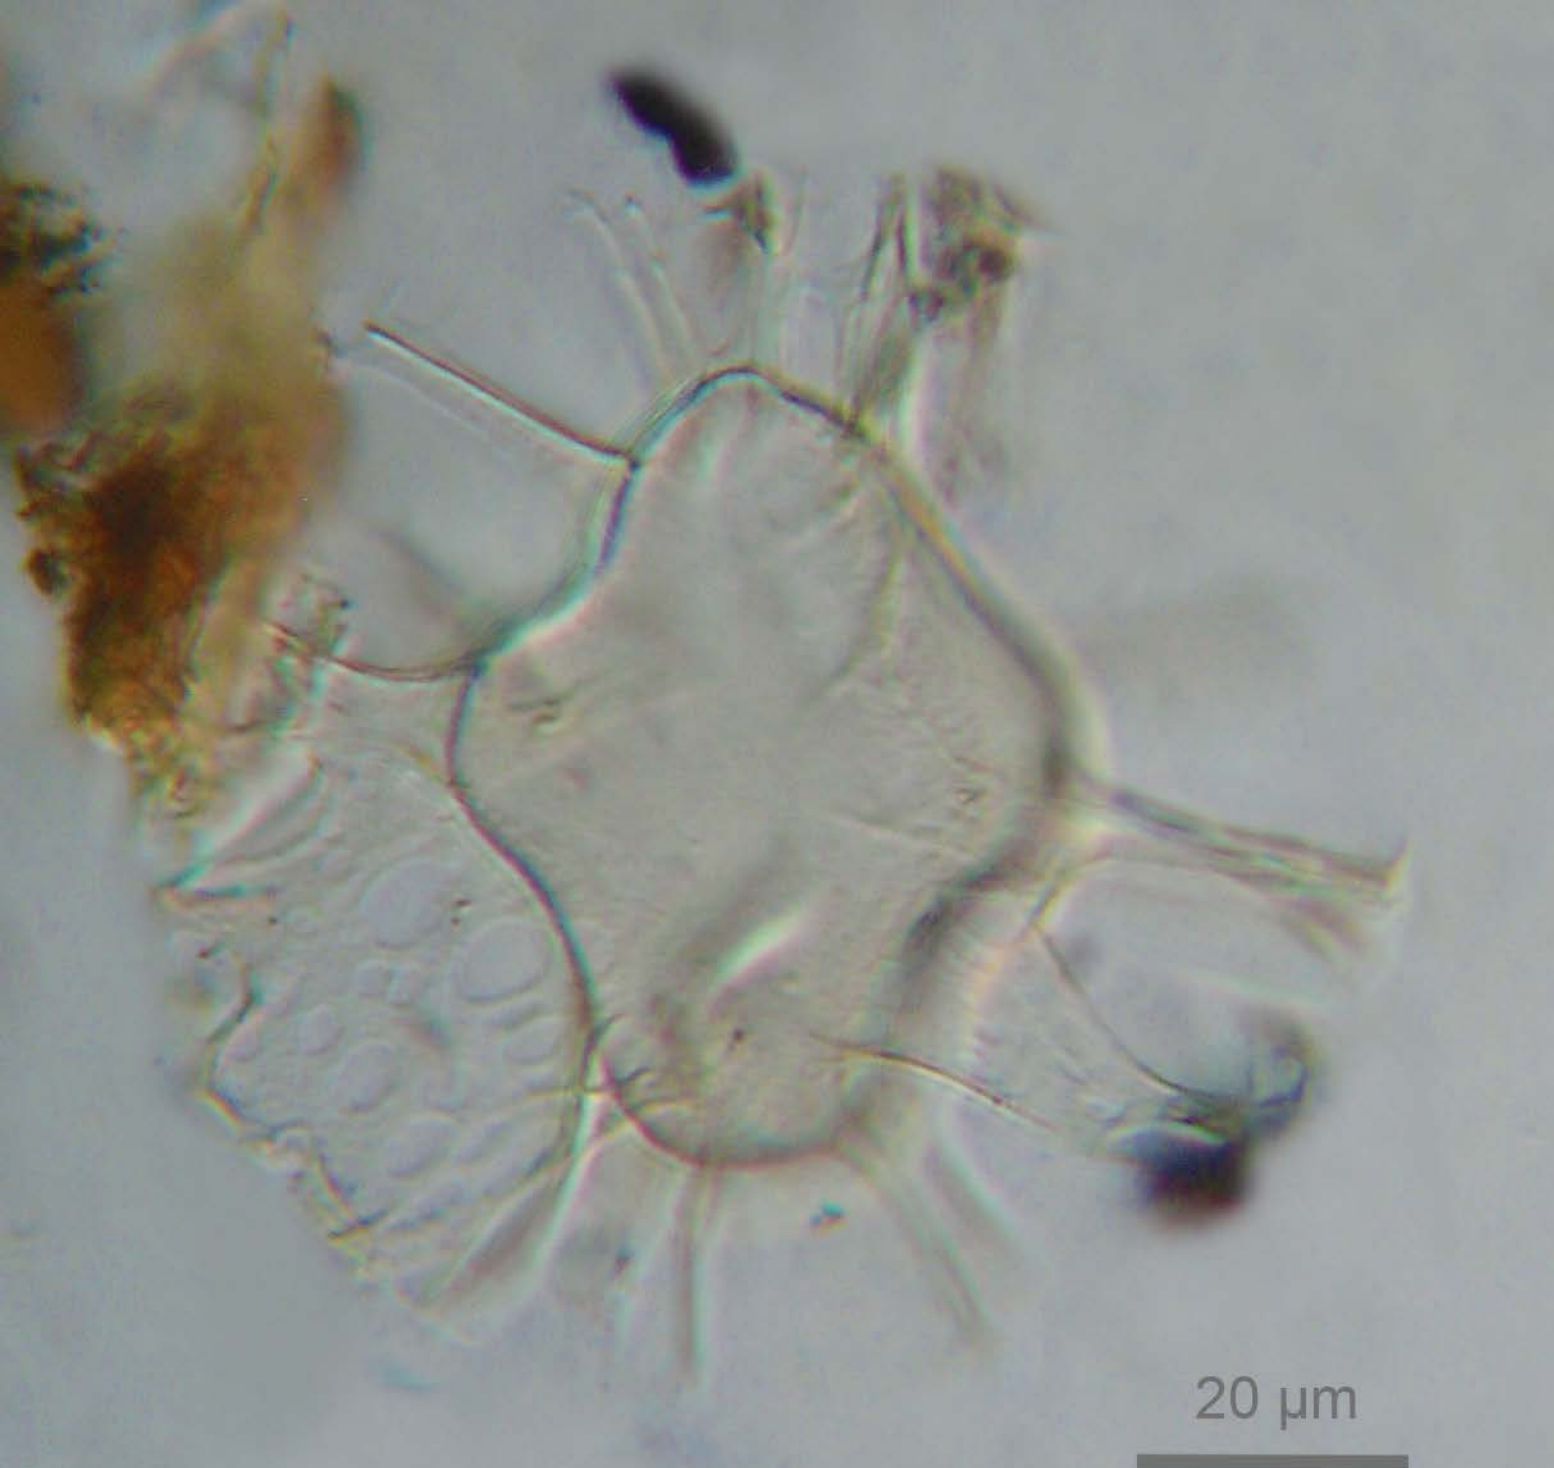

*Spiniferites cruciformis* Wall & Dale 1973 : Marmara Sea

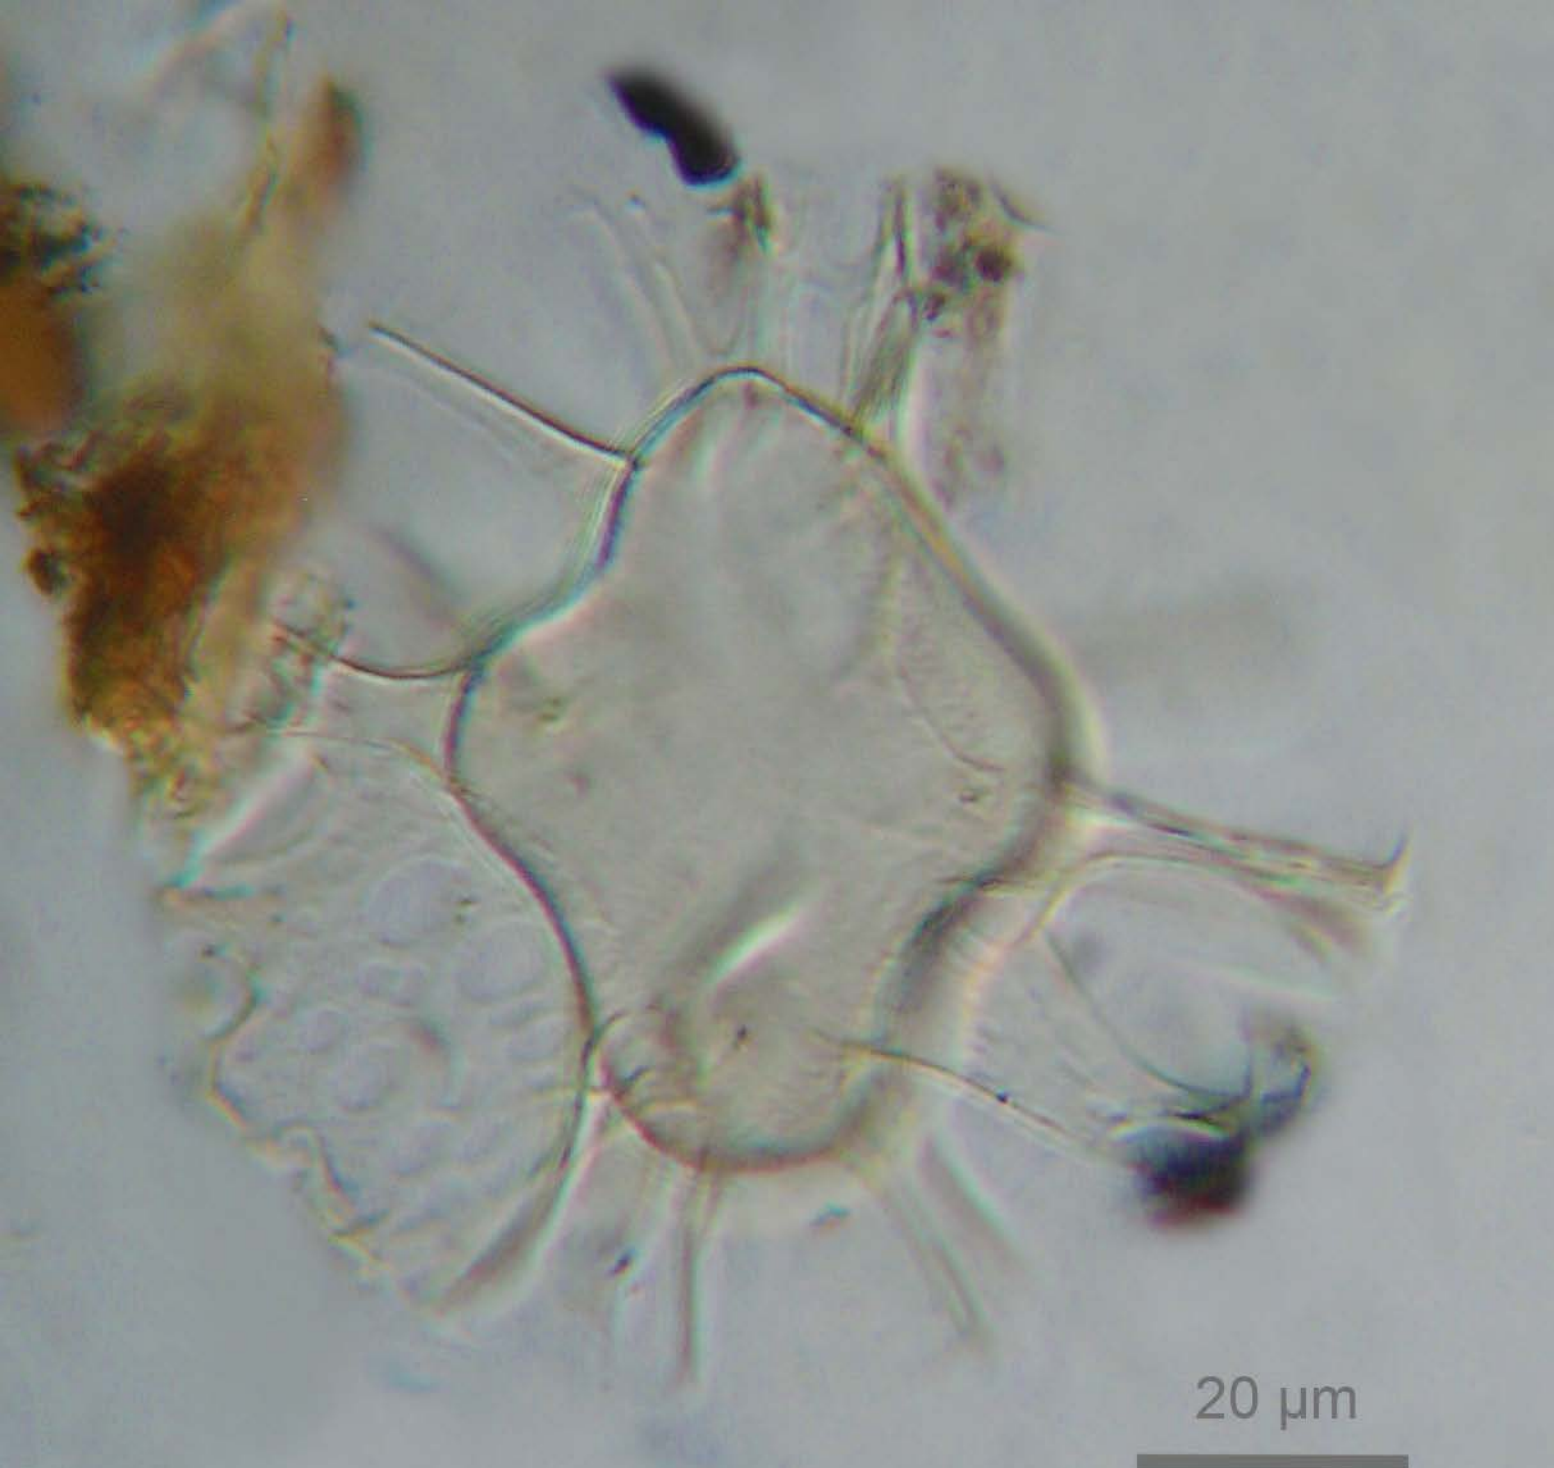

*Spiniferites cruciformis* Wall & Dale 1973 : Marmara Sea



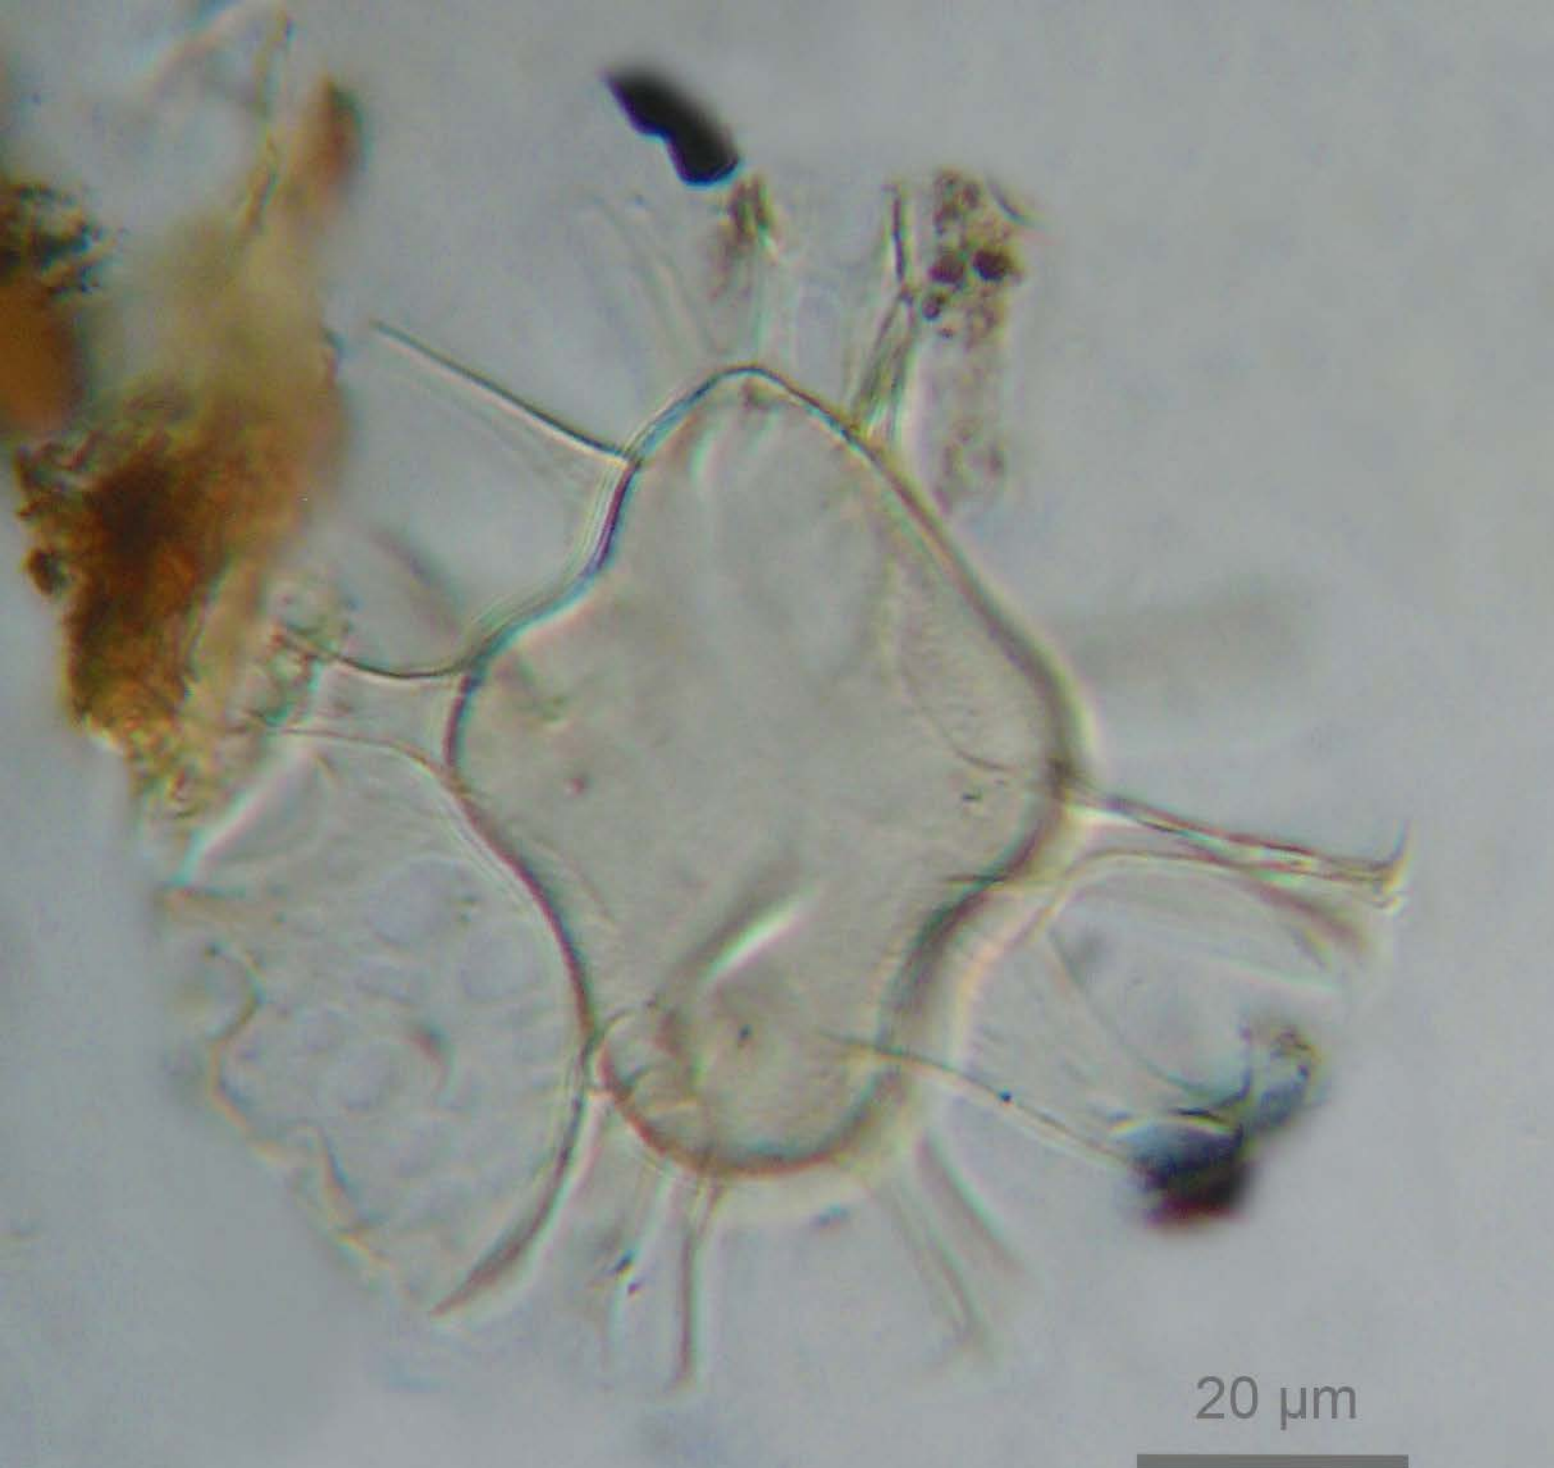

*Spiniferites cruciformis* Wall & Dale 1973 : Marmara Sea

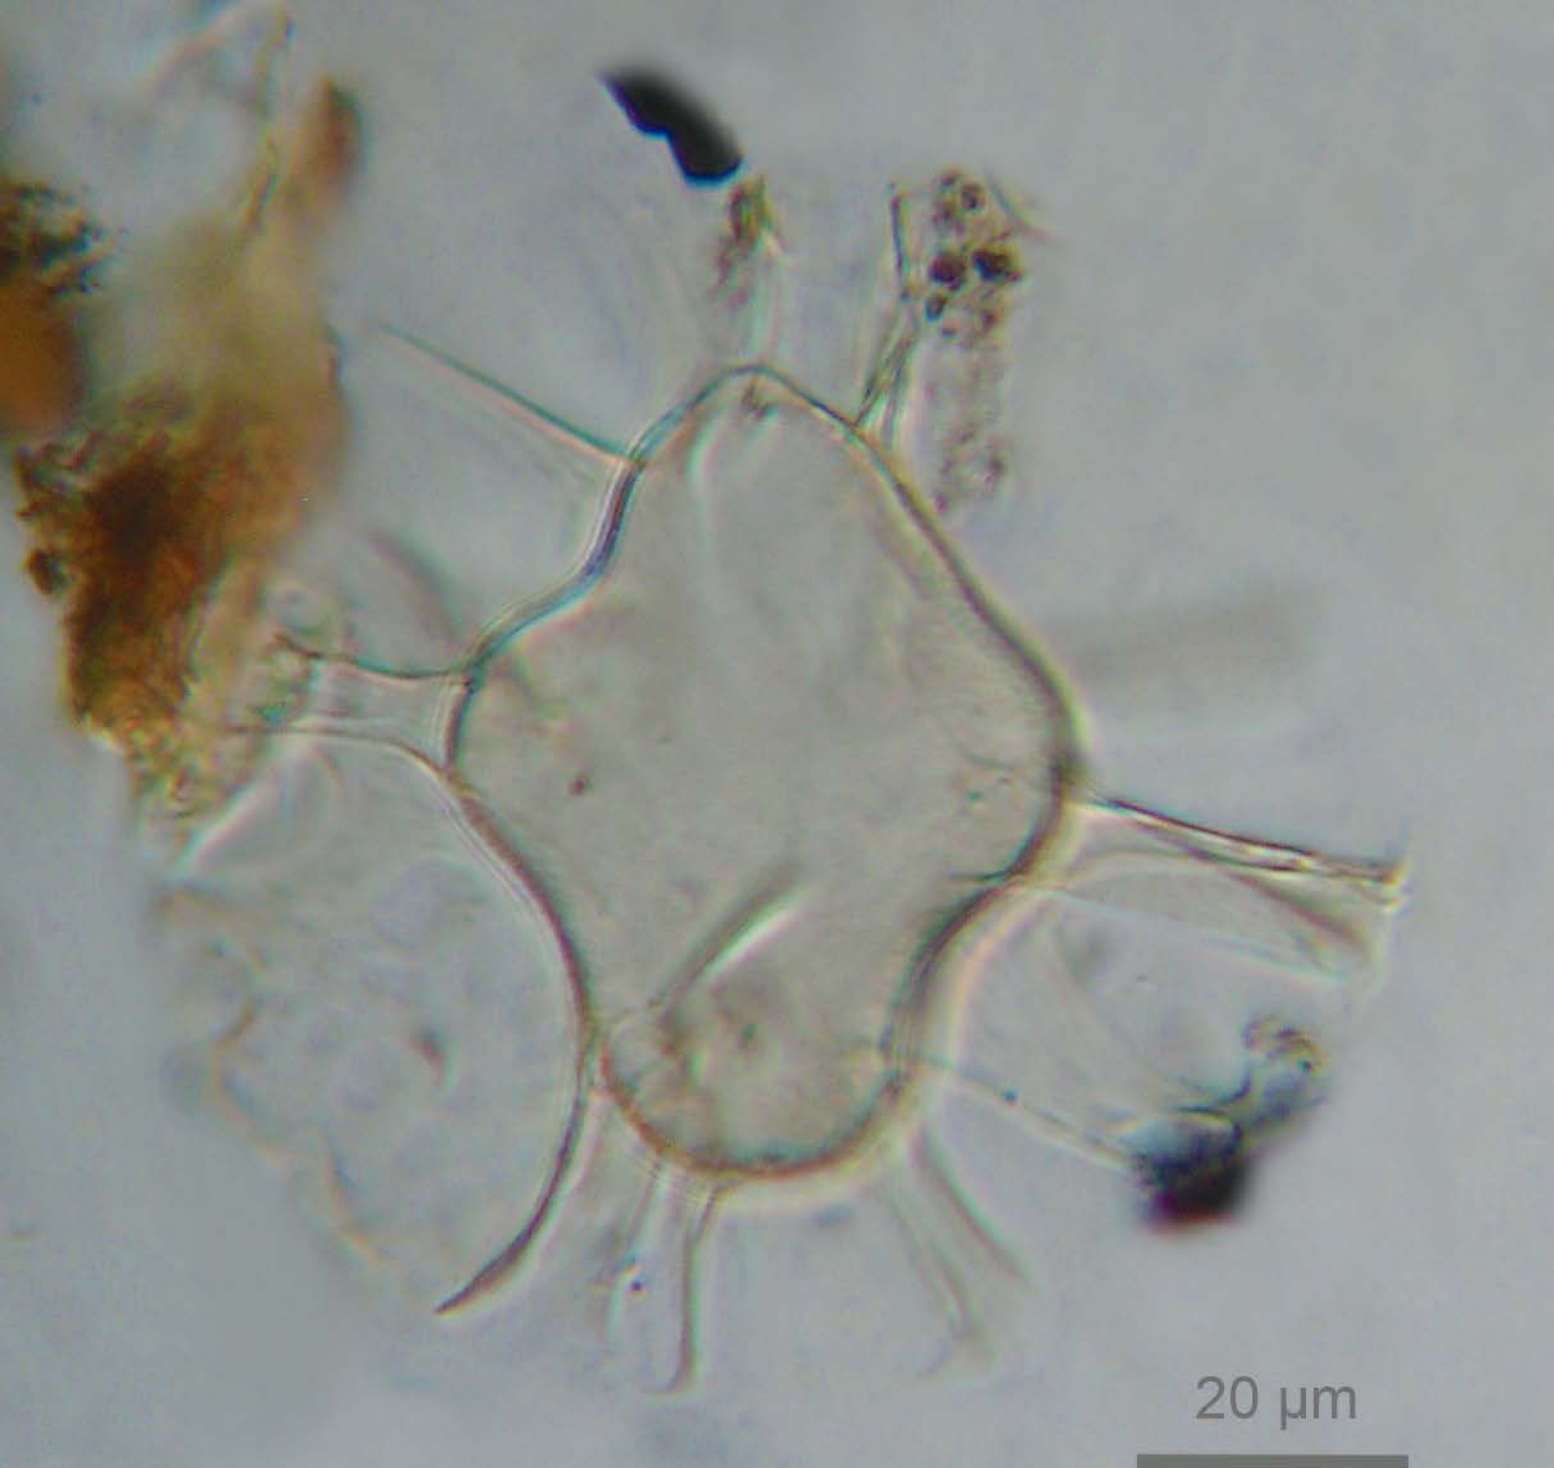

*Spiniferites cruciformis* Wall & Dale 1973 : Marmara Sea

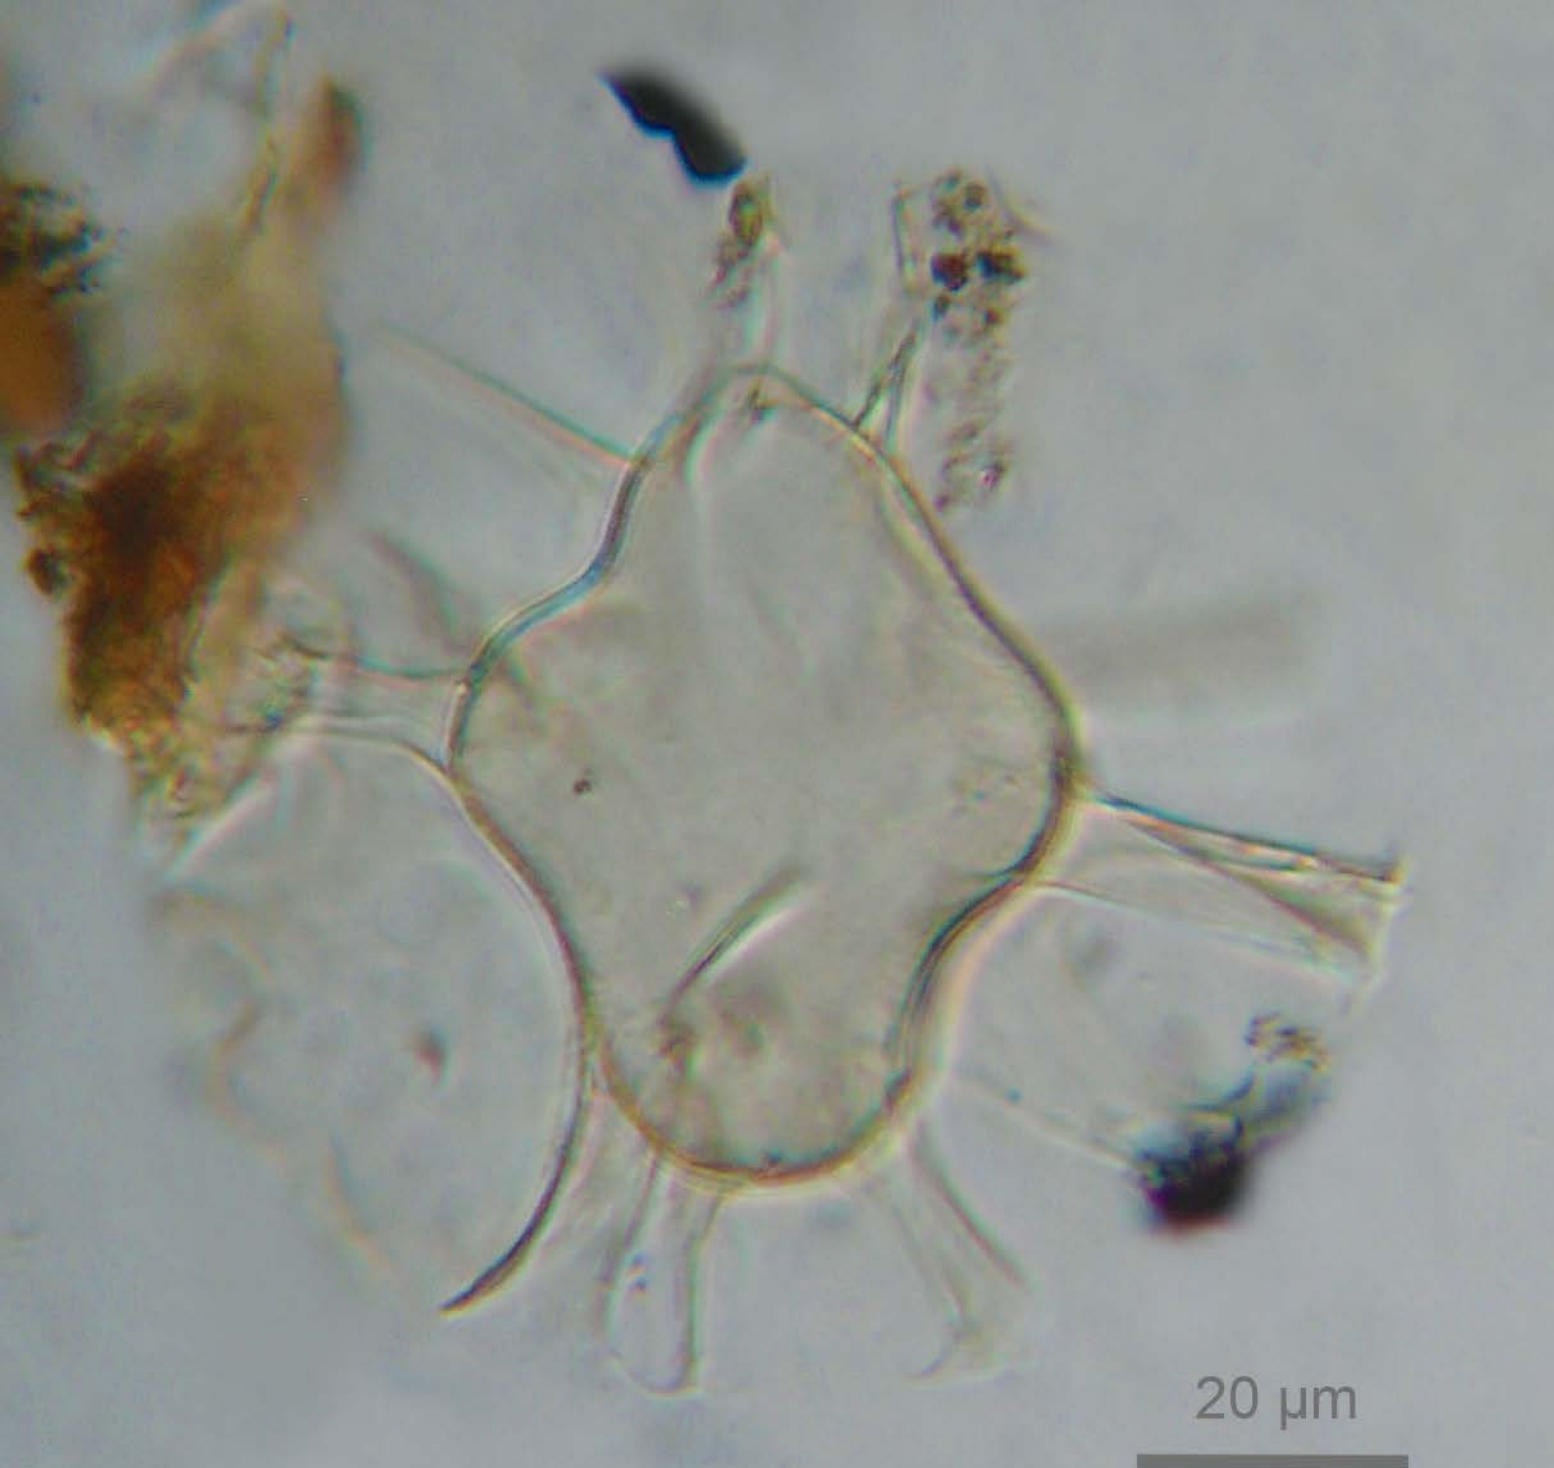

*Spiniferites cruciformis* Wall & Dale 1973 : Marmara Sea



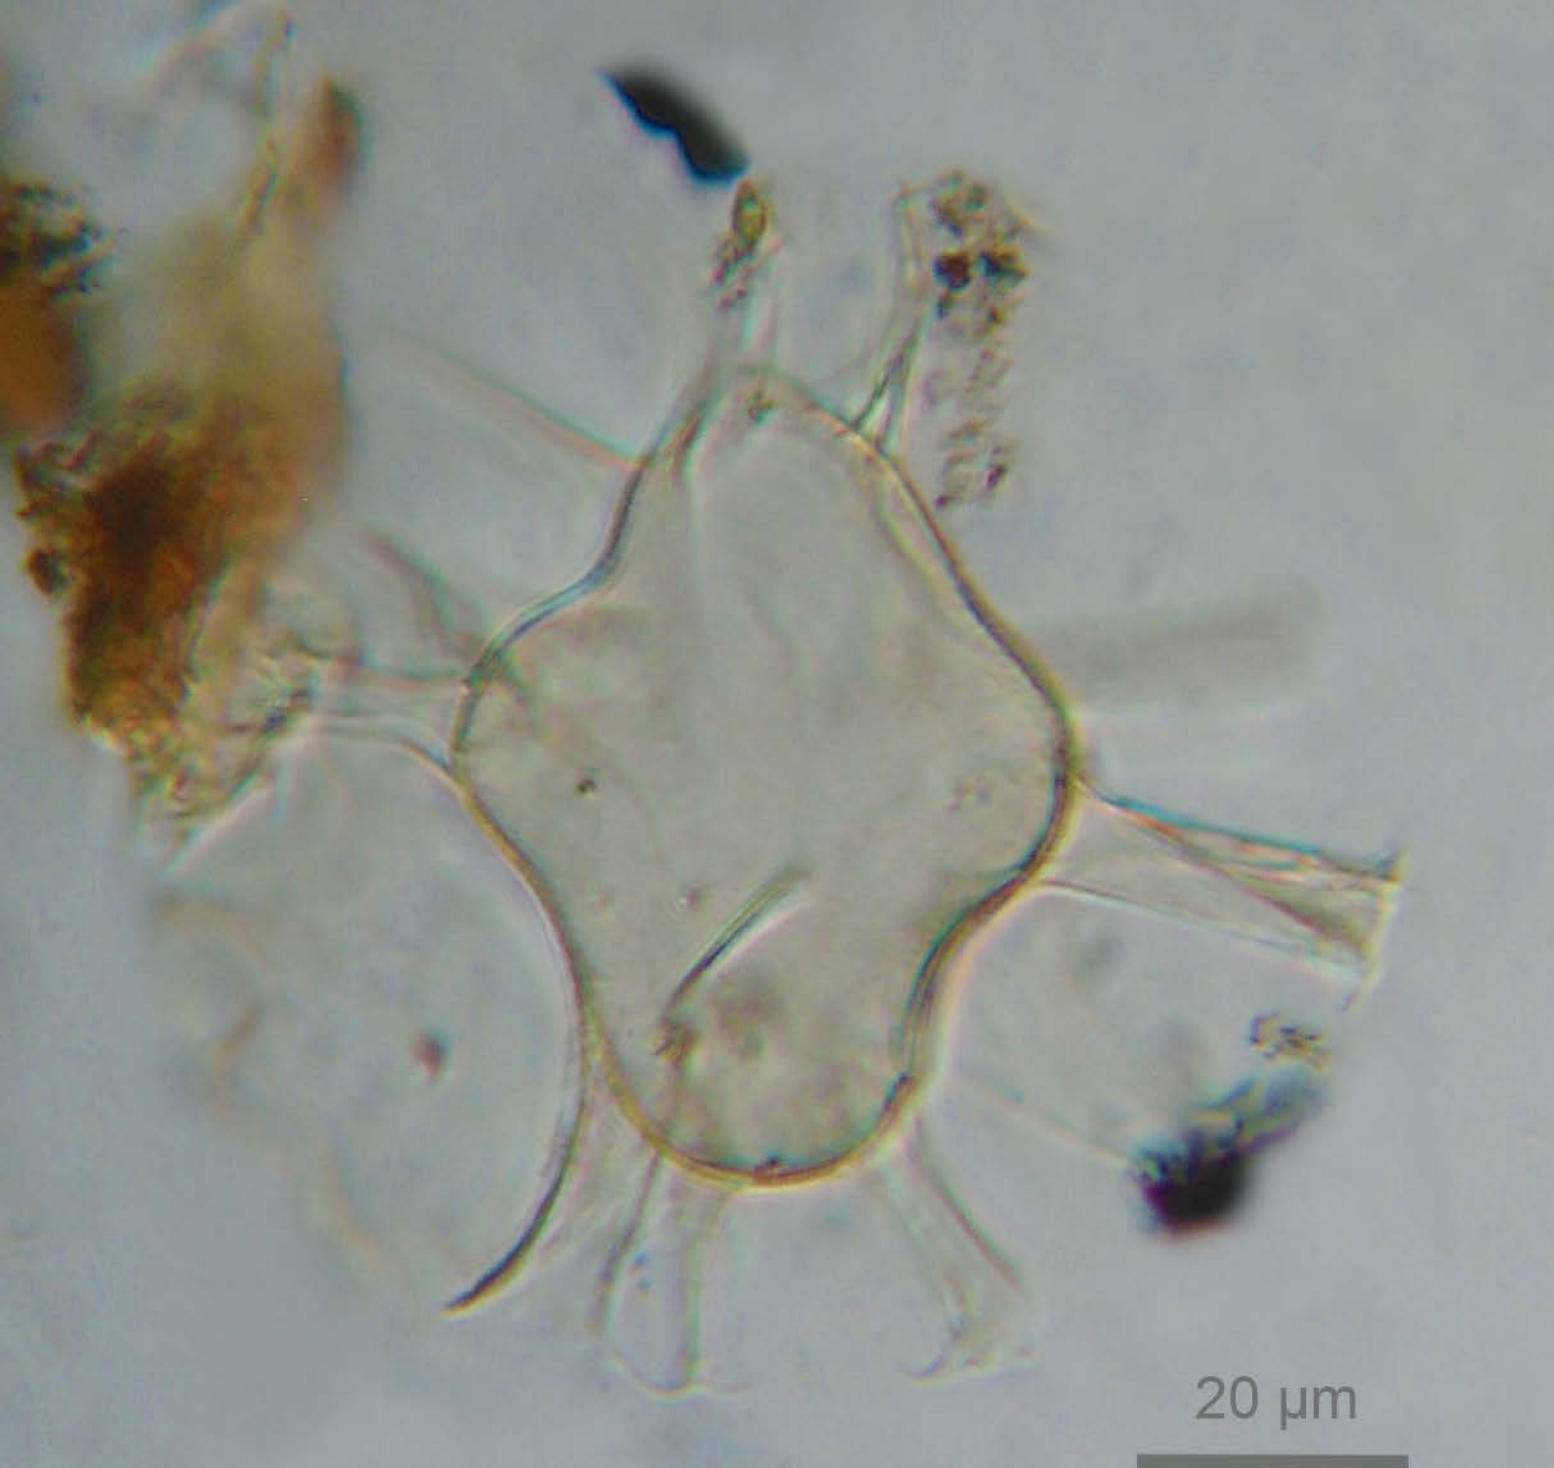

*Spiniferites cruciformis* Wall & Dale 1973 : Marmara Sea

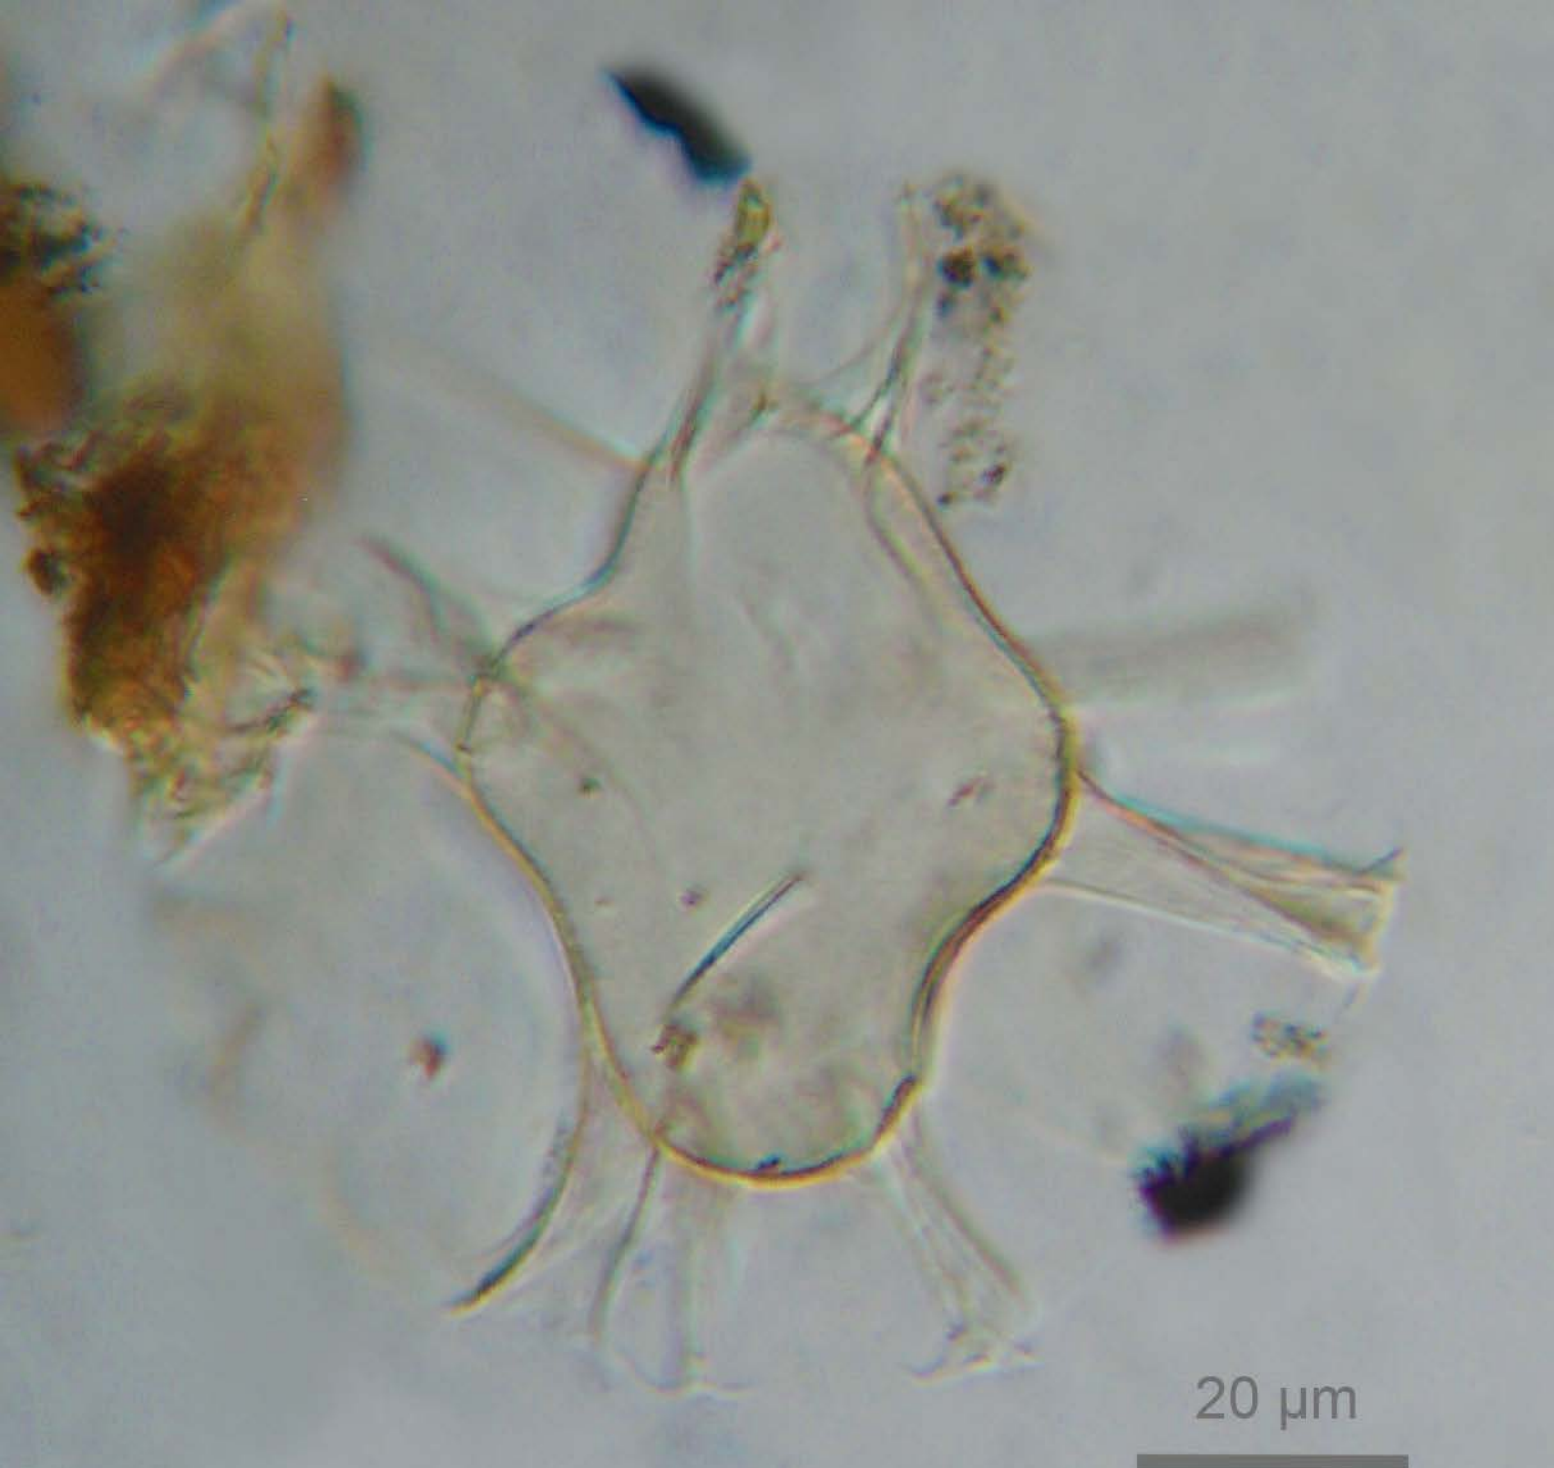

*Spiniferites cruciformis* Wall & Dale 1973 : Marmara Sea

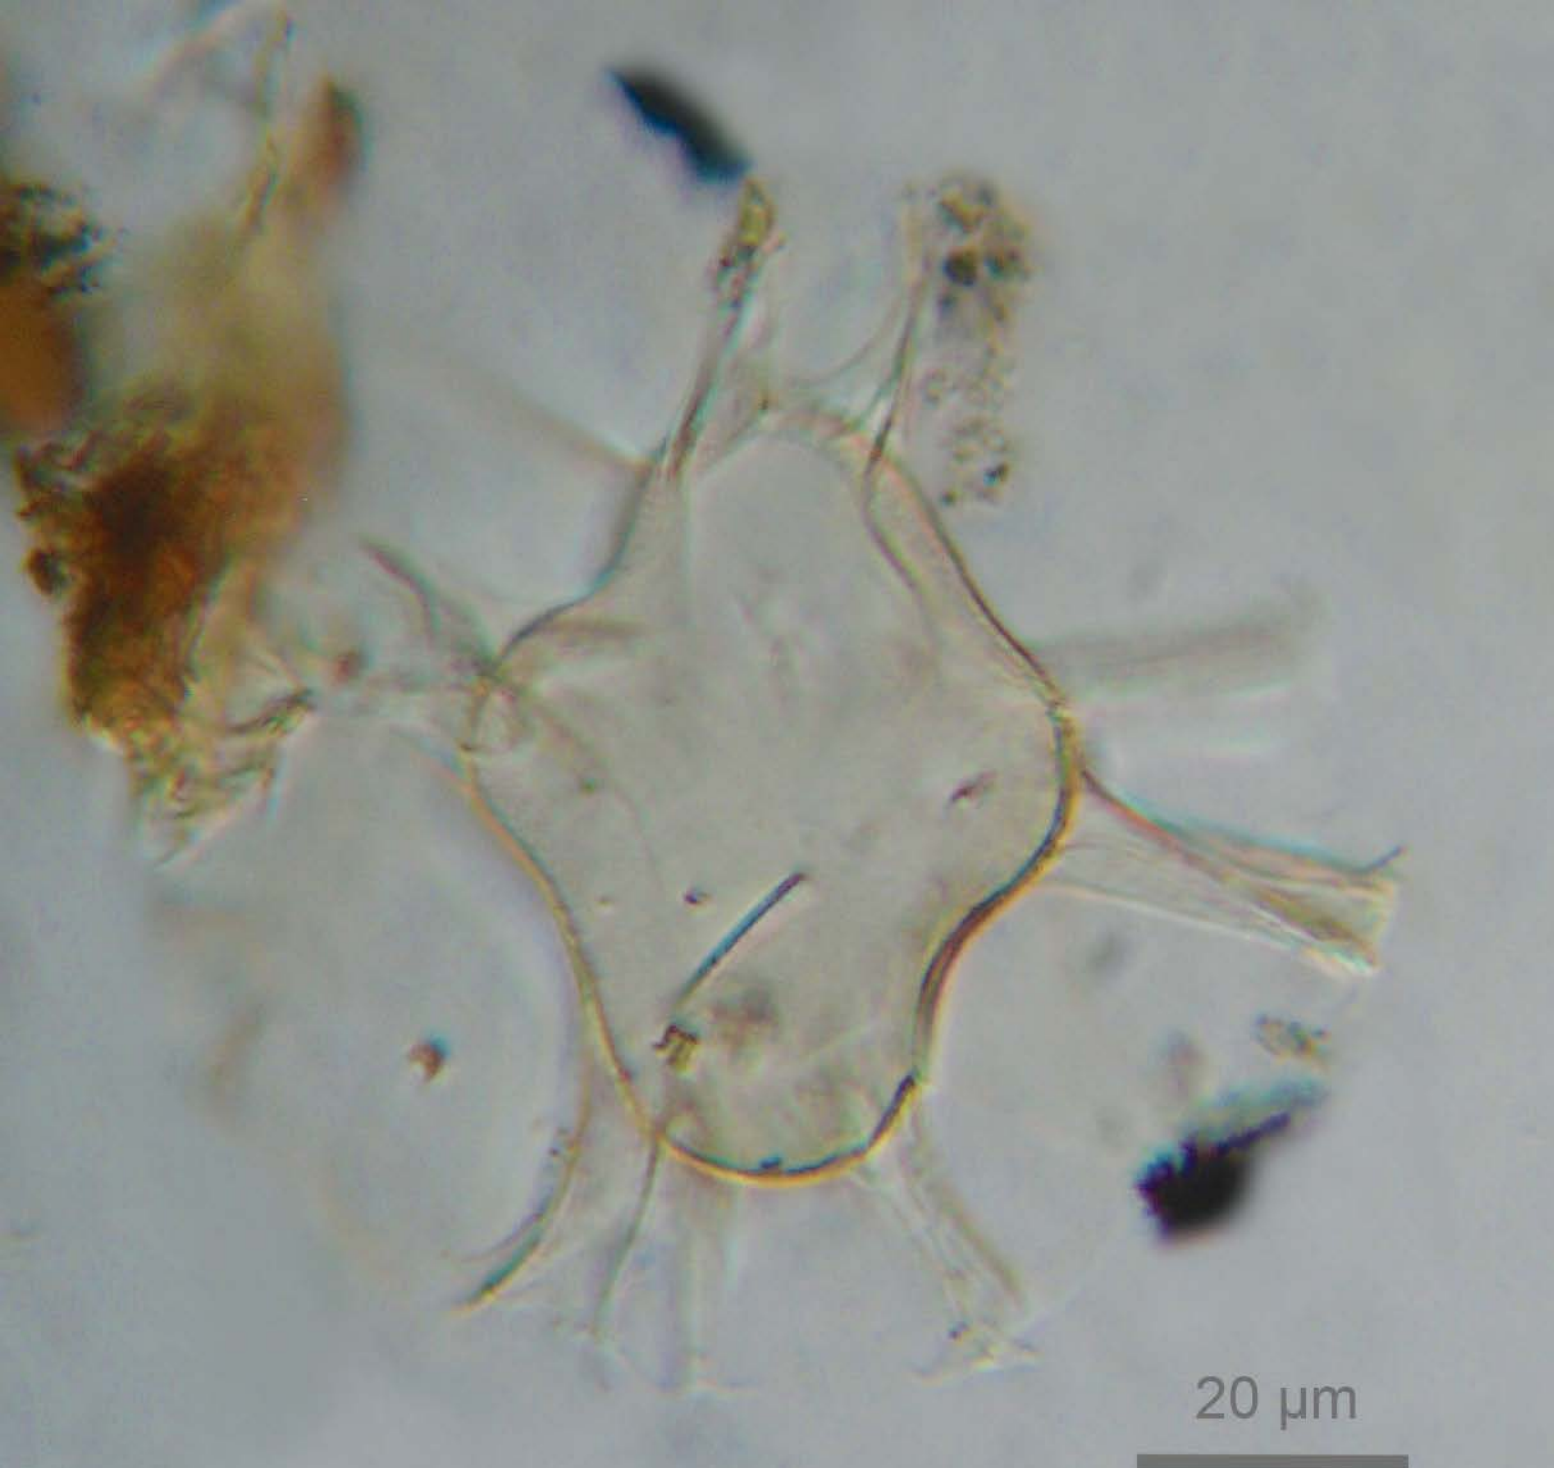

*Spiniferites cruciformis* Wall & Dale 1973 : Marmara Sea



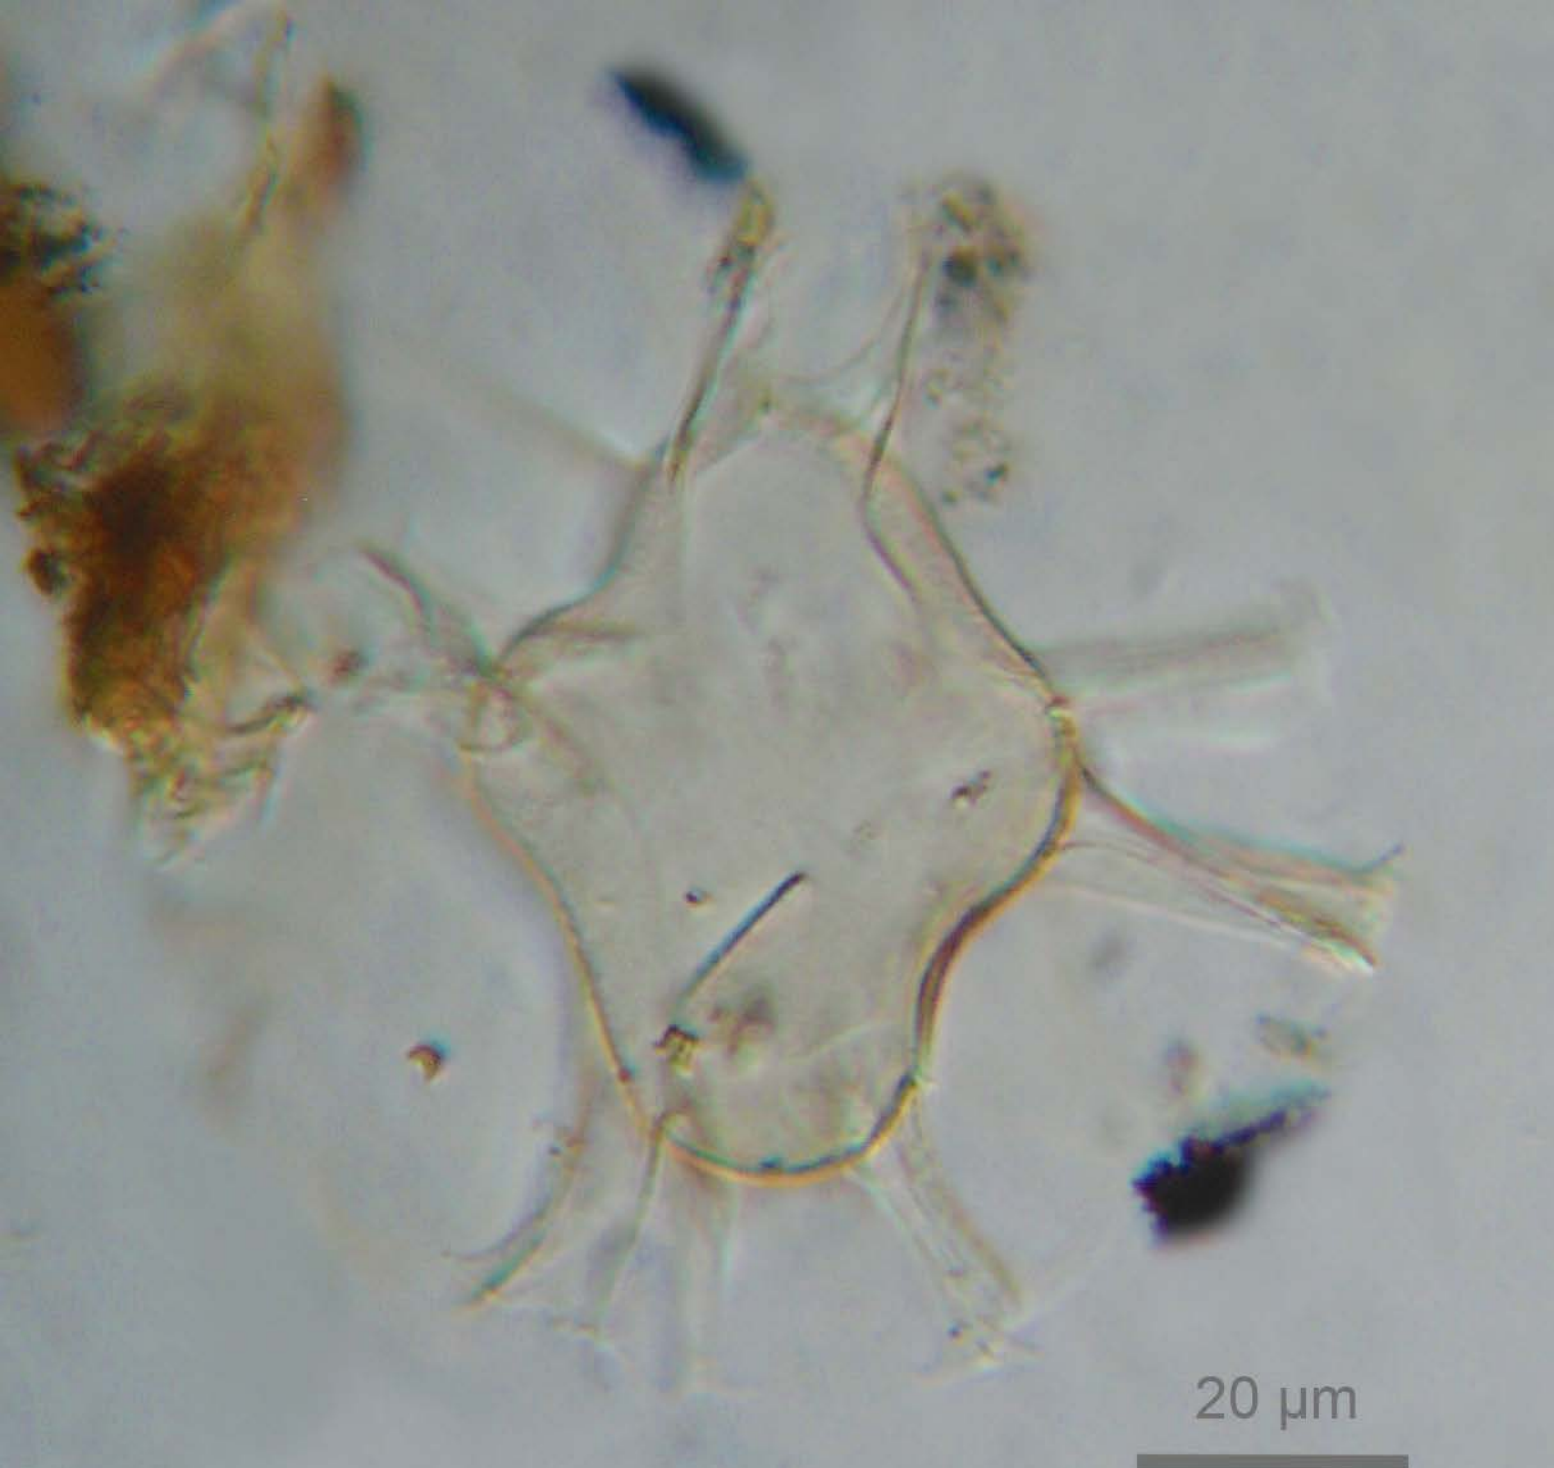

*Spiniferites cruciformis* Wall & Dale 1973 : Marmara Sea

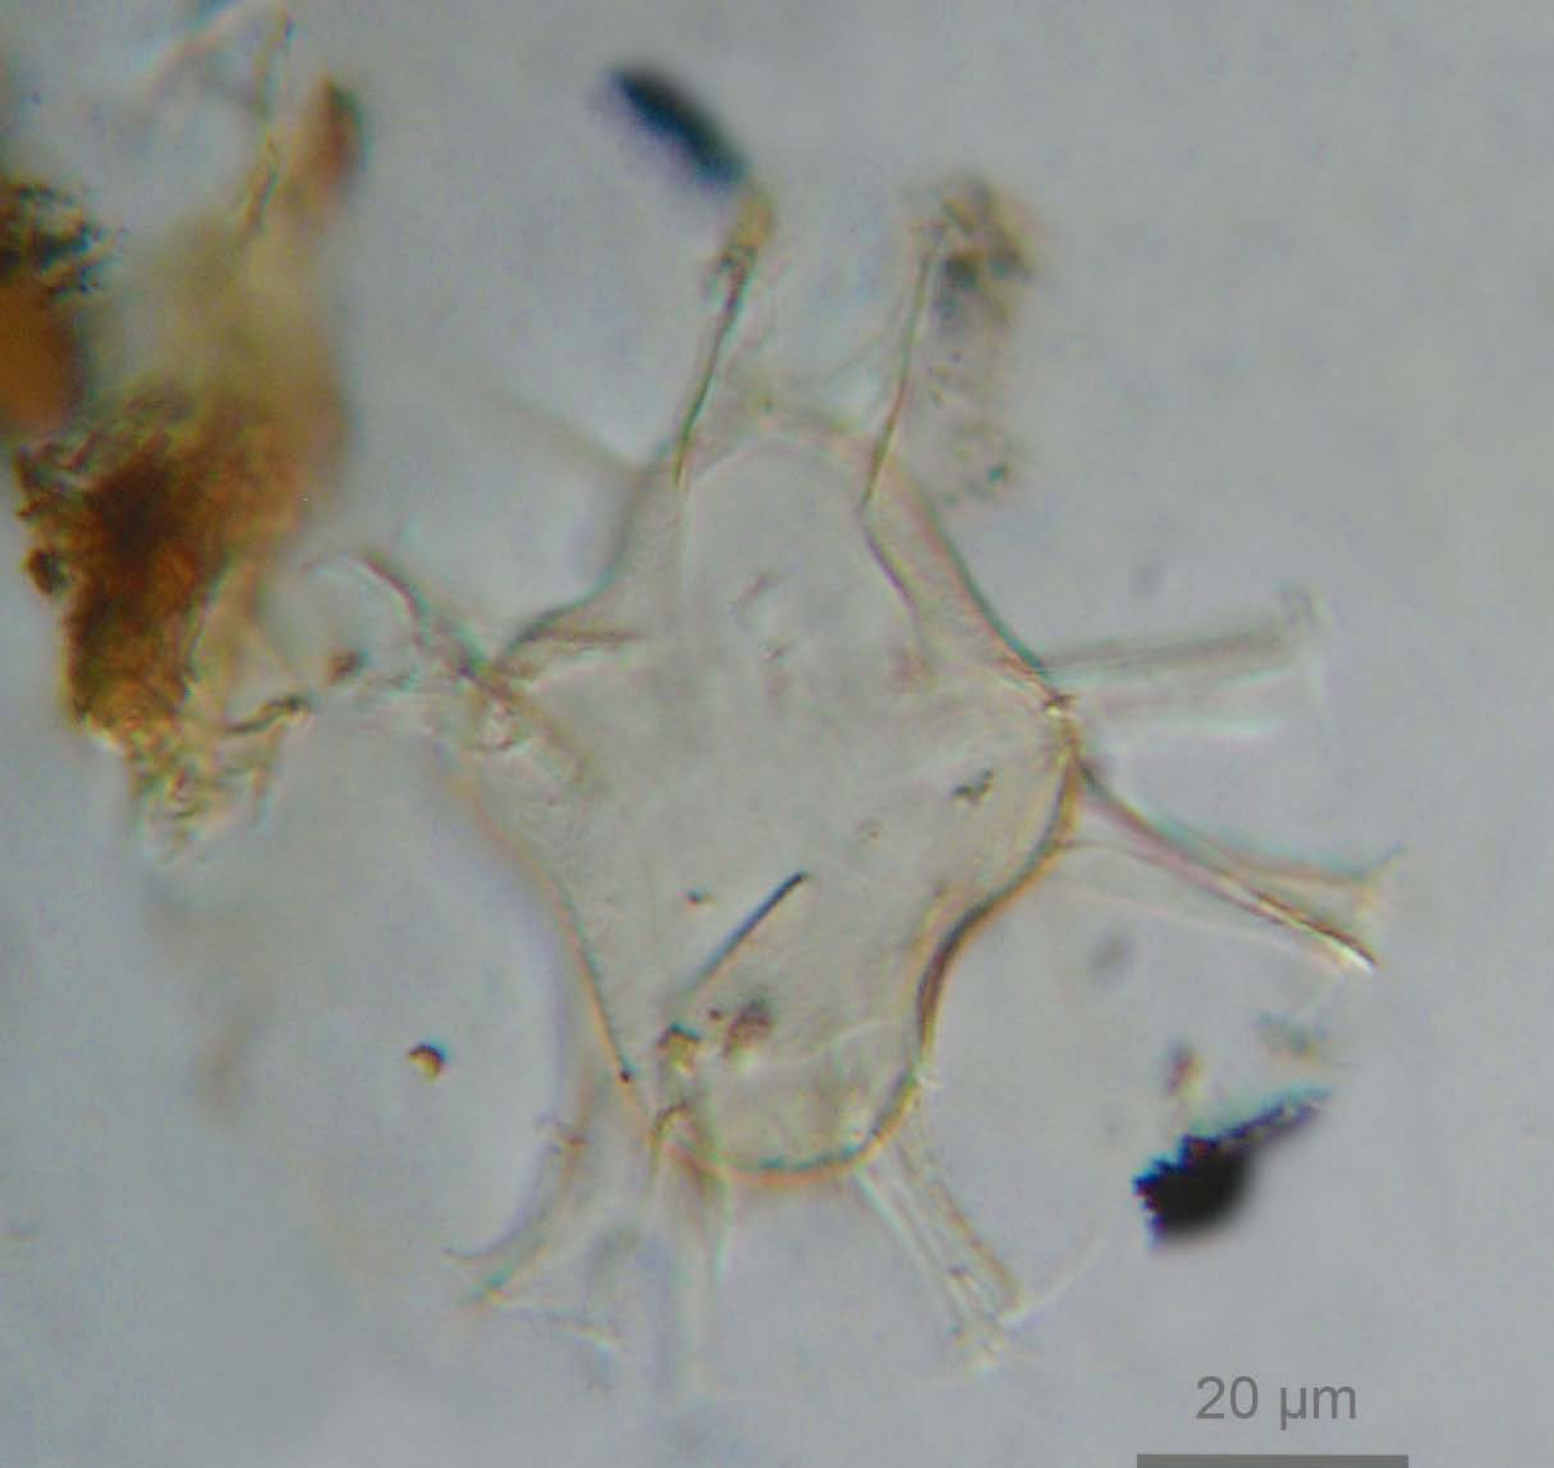

*Spiniferites cruciformis* Wall & Dale 1973 : Marmara Sea

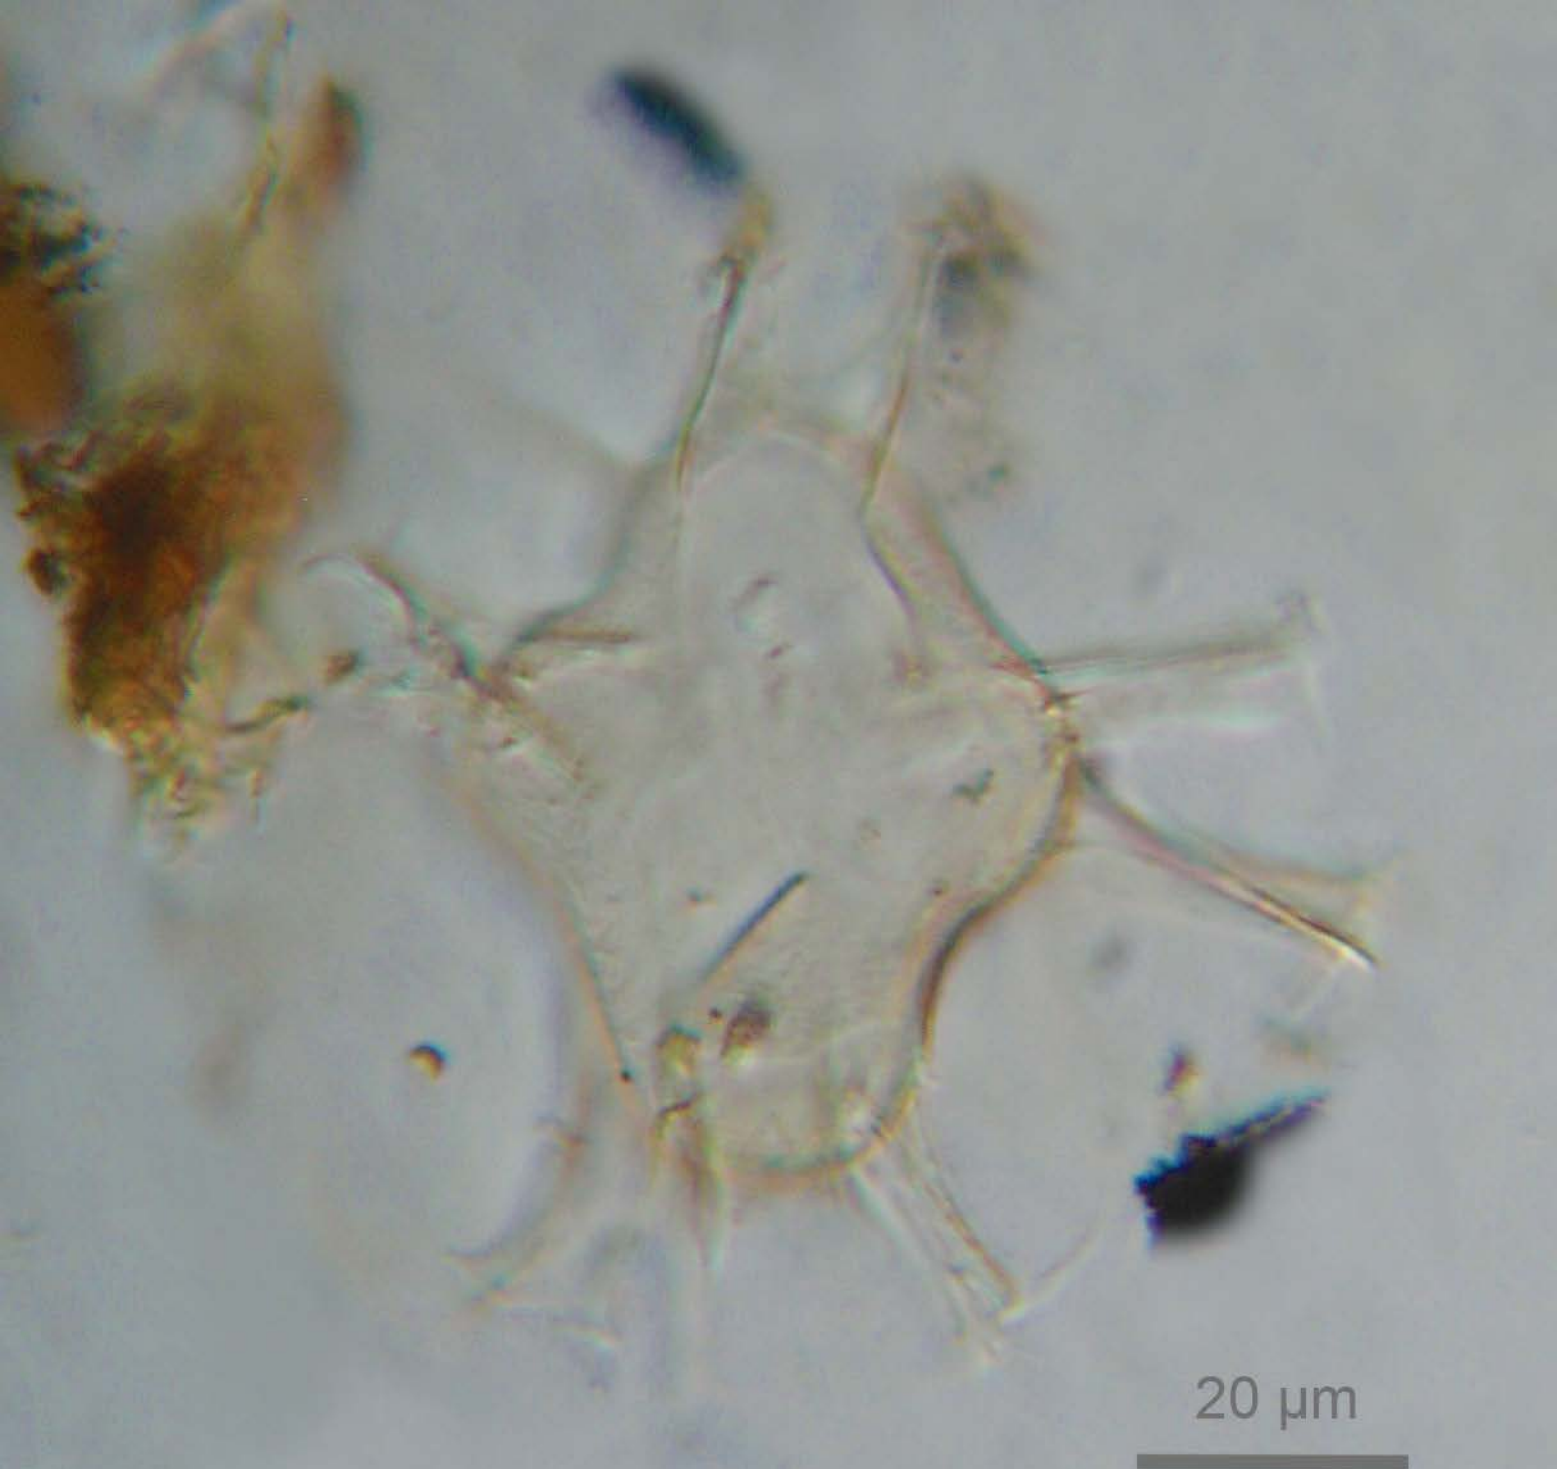

*Spiniferites cruciformis* Wall & Dale 1973 : Marmara Sea



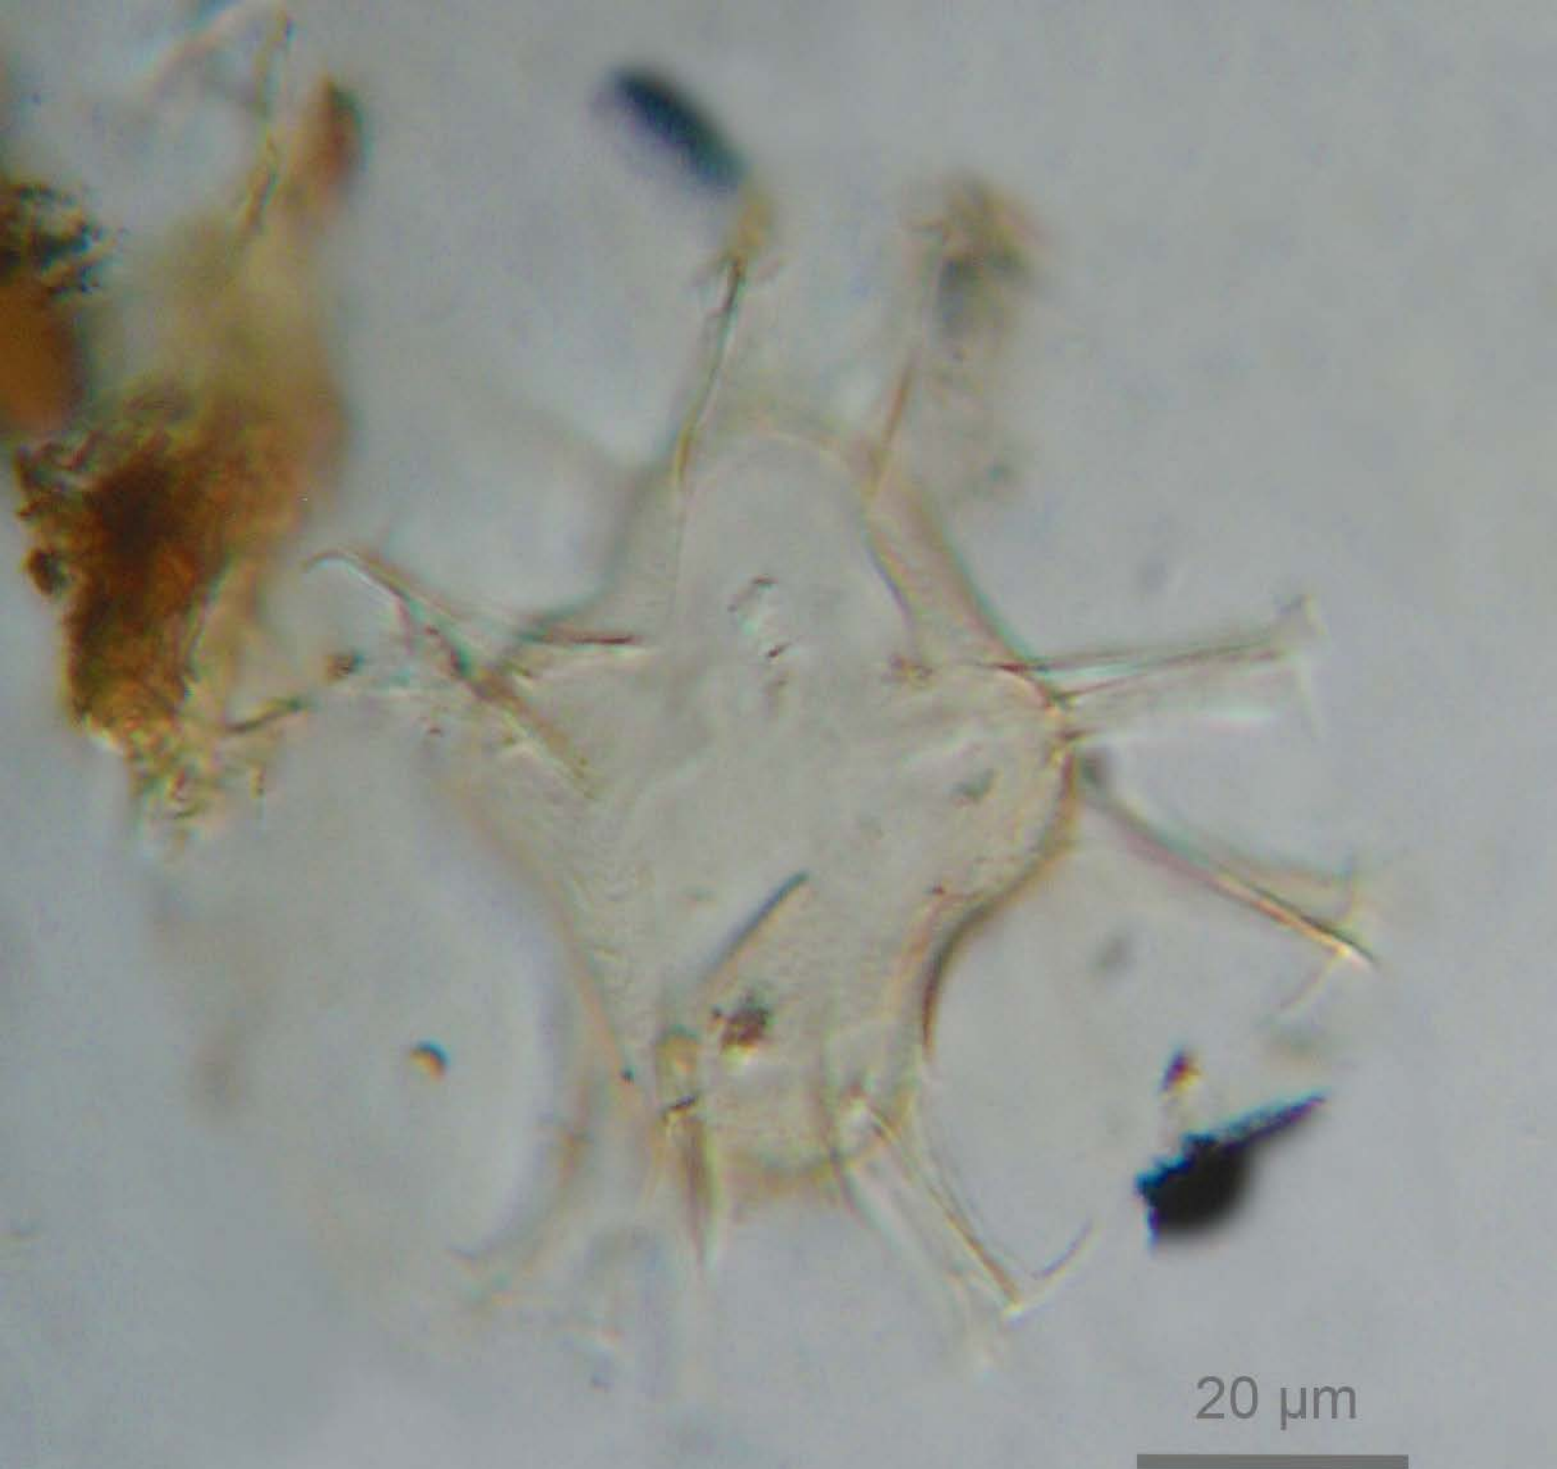

*Spiniferites cruciformis* Wall & Dale 1973 : Marmara Sea

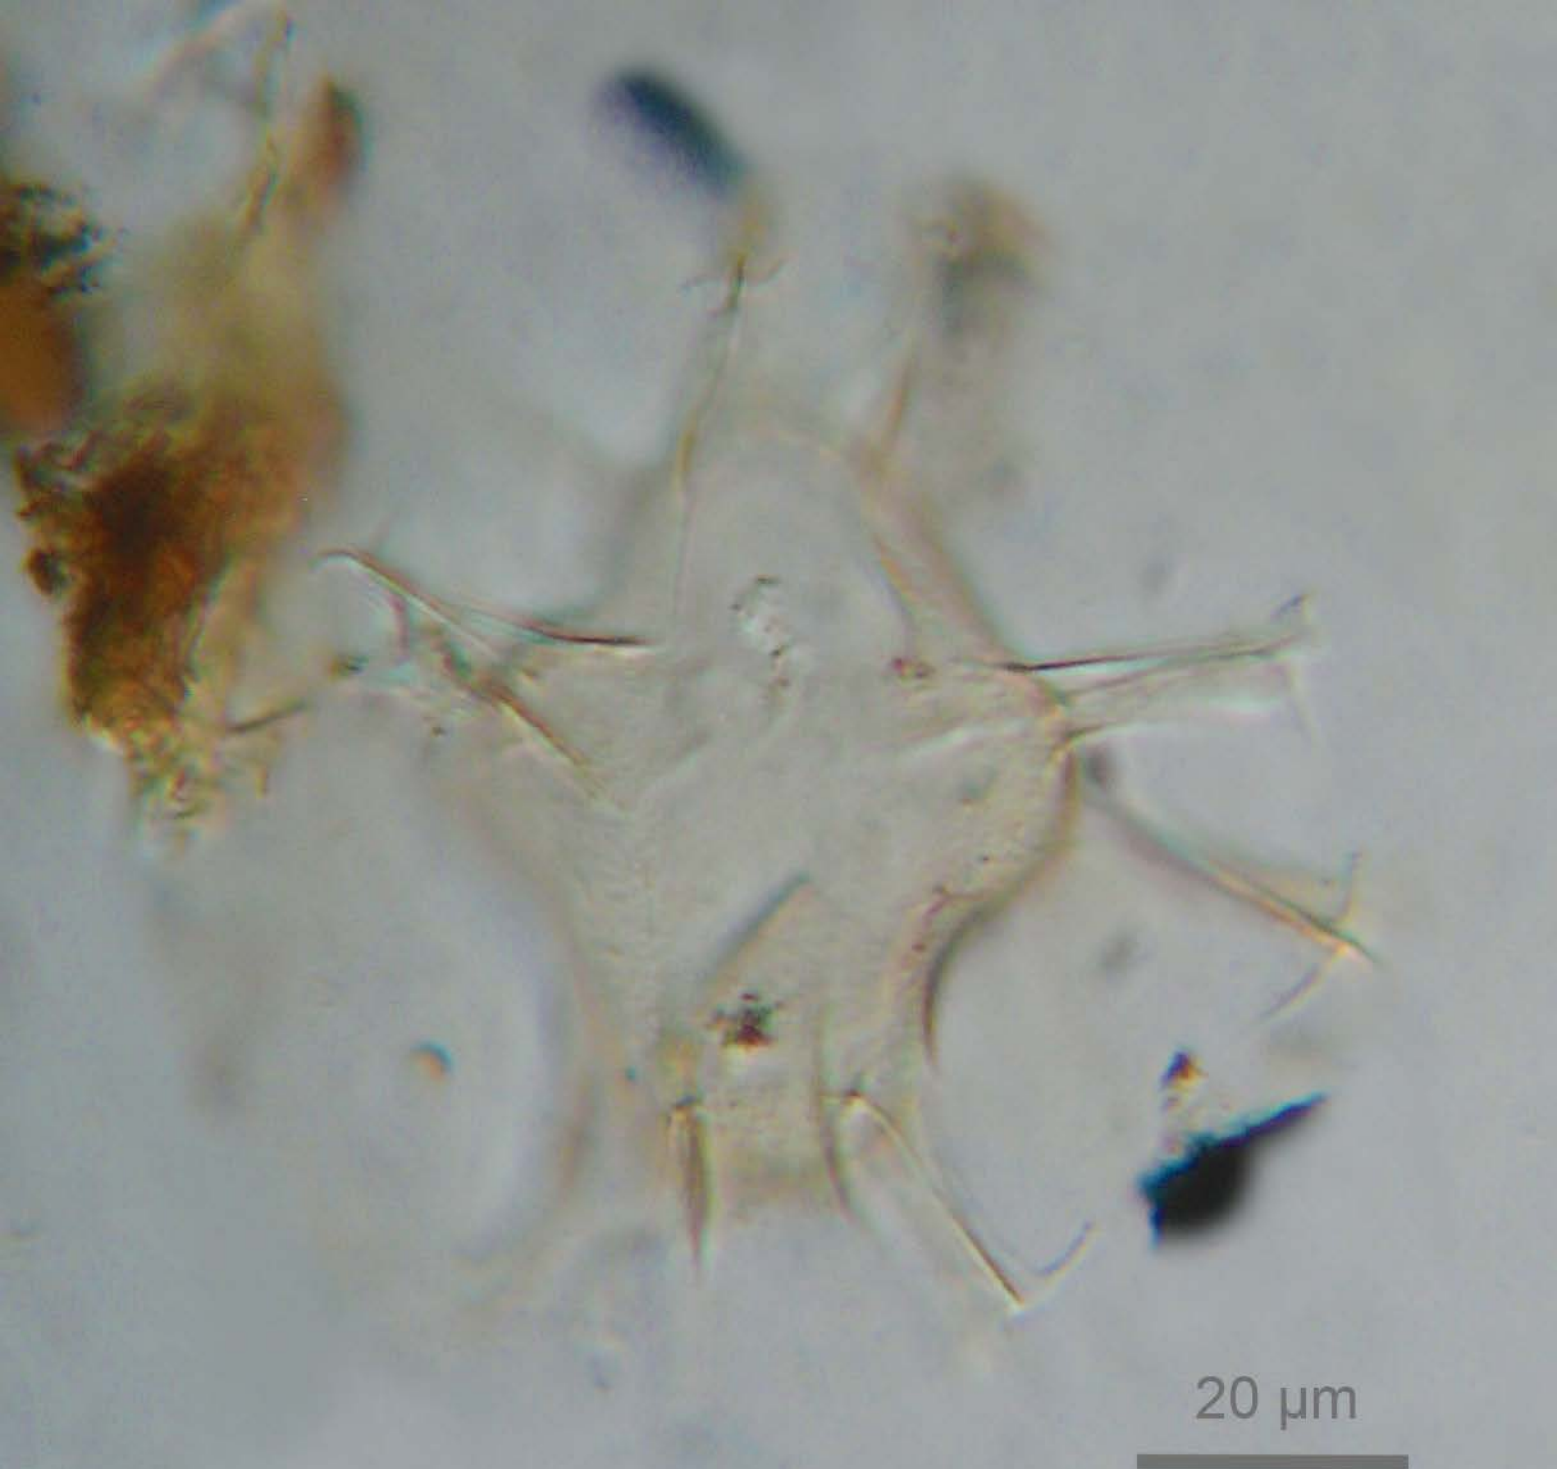

*Spiniferites cruciformis* Wall & Dale 1973 : Marmara Sea

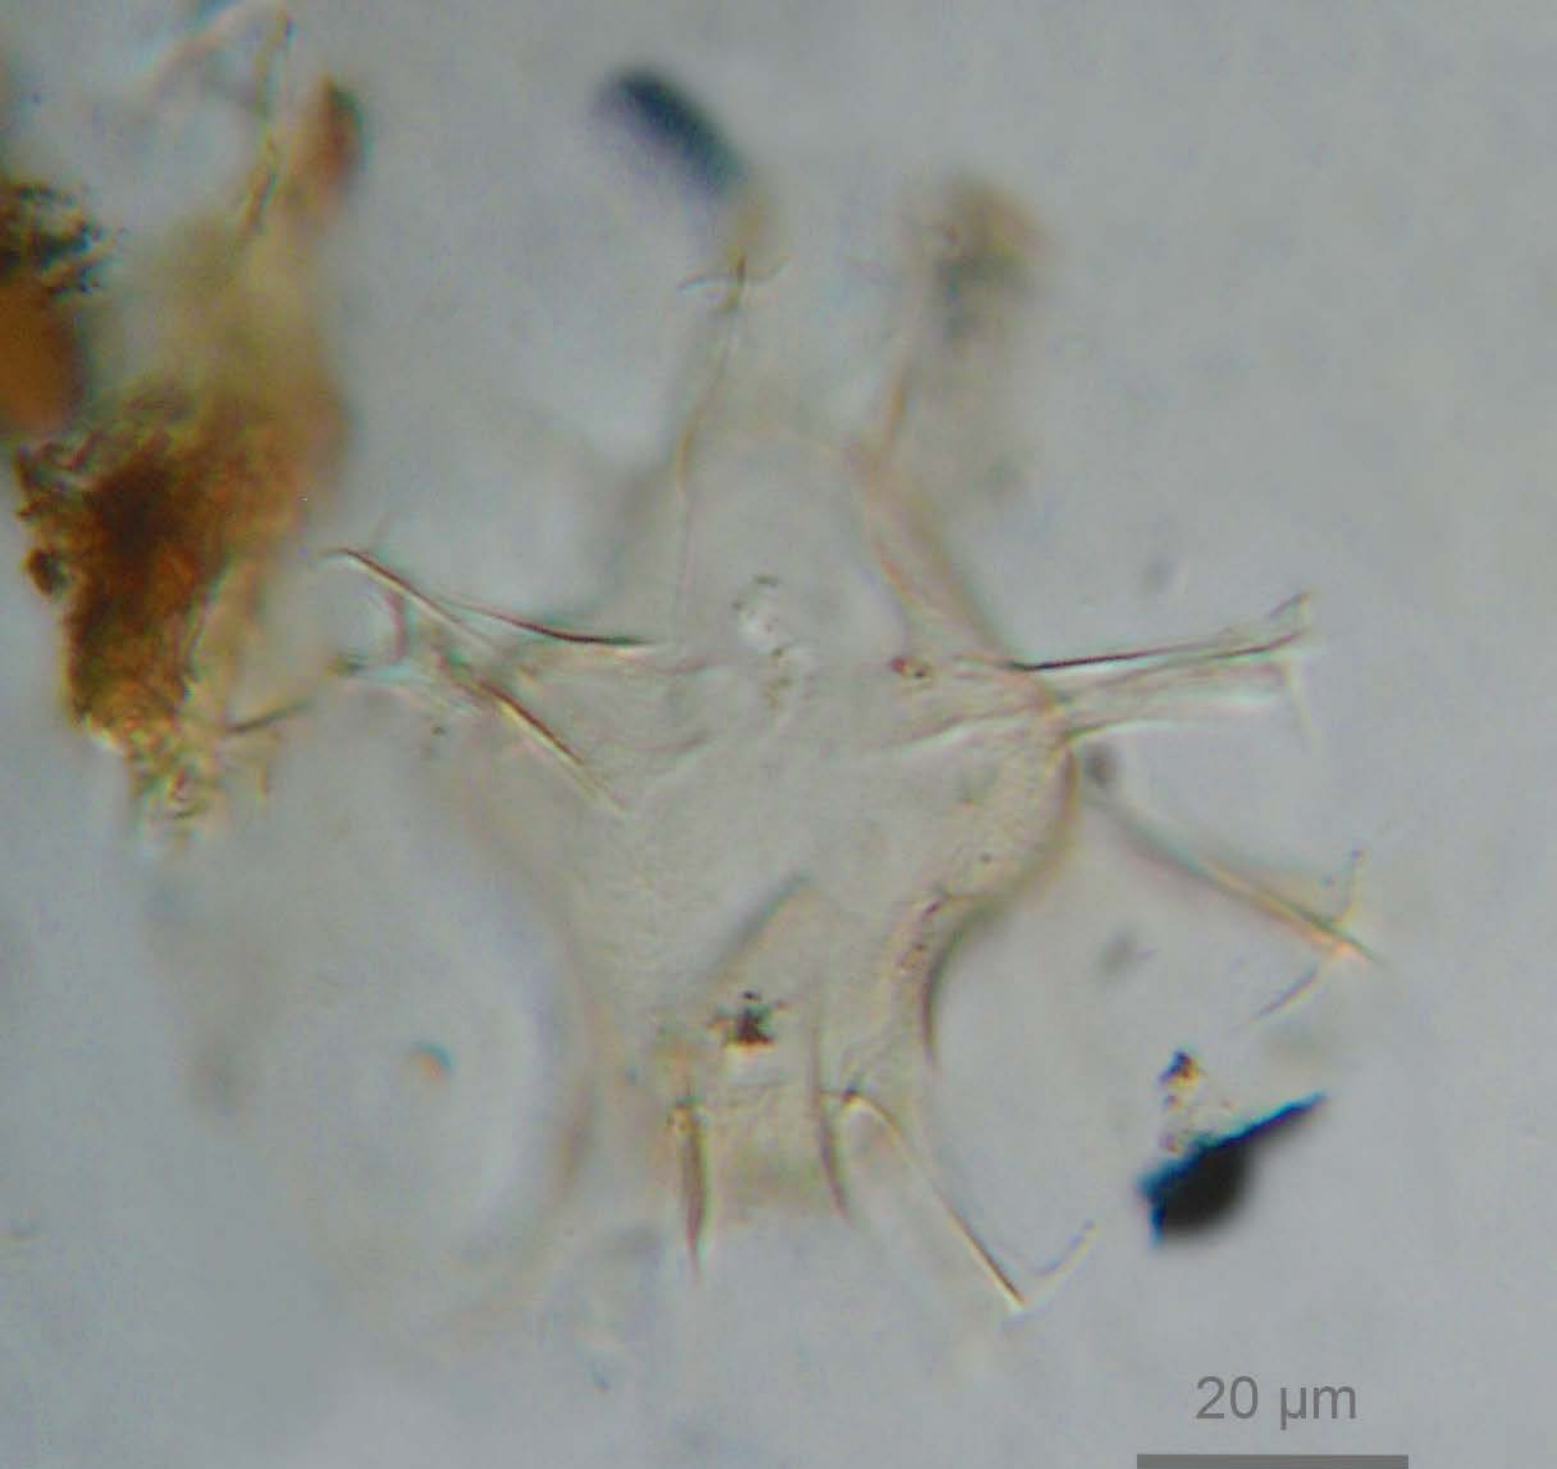

*Spiniferites cruciformis* Wall & Dale 1973 : Marmara Sea



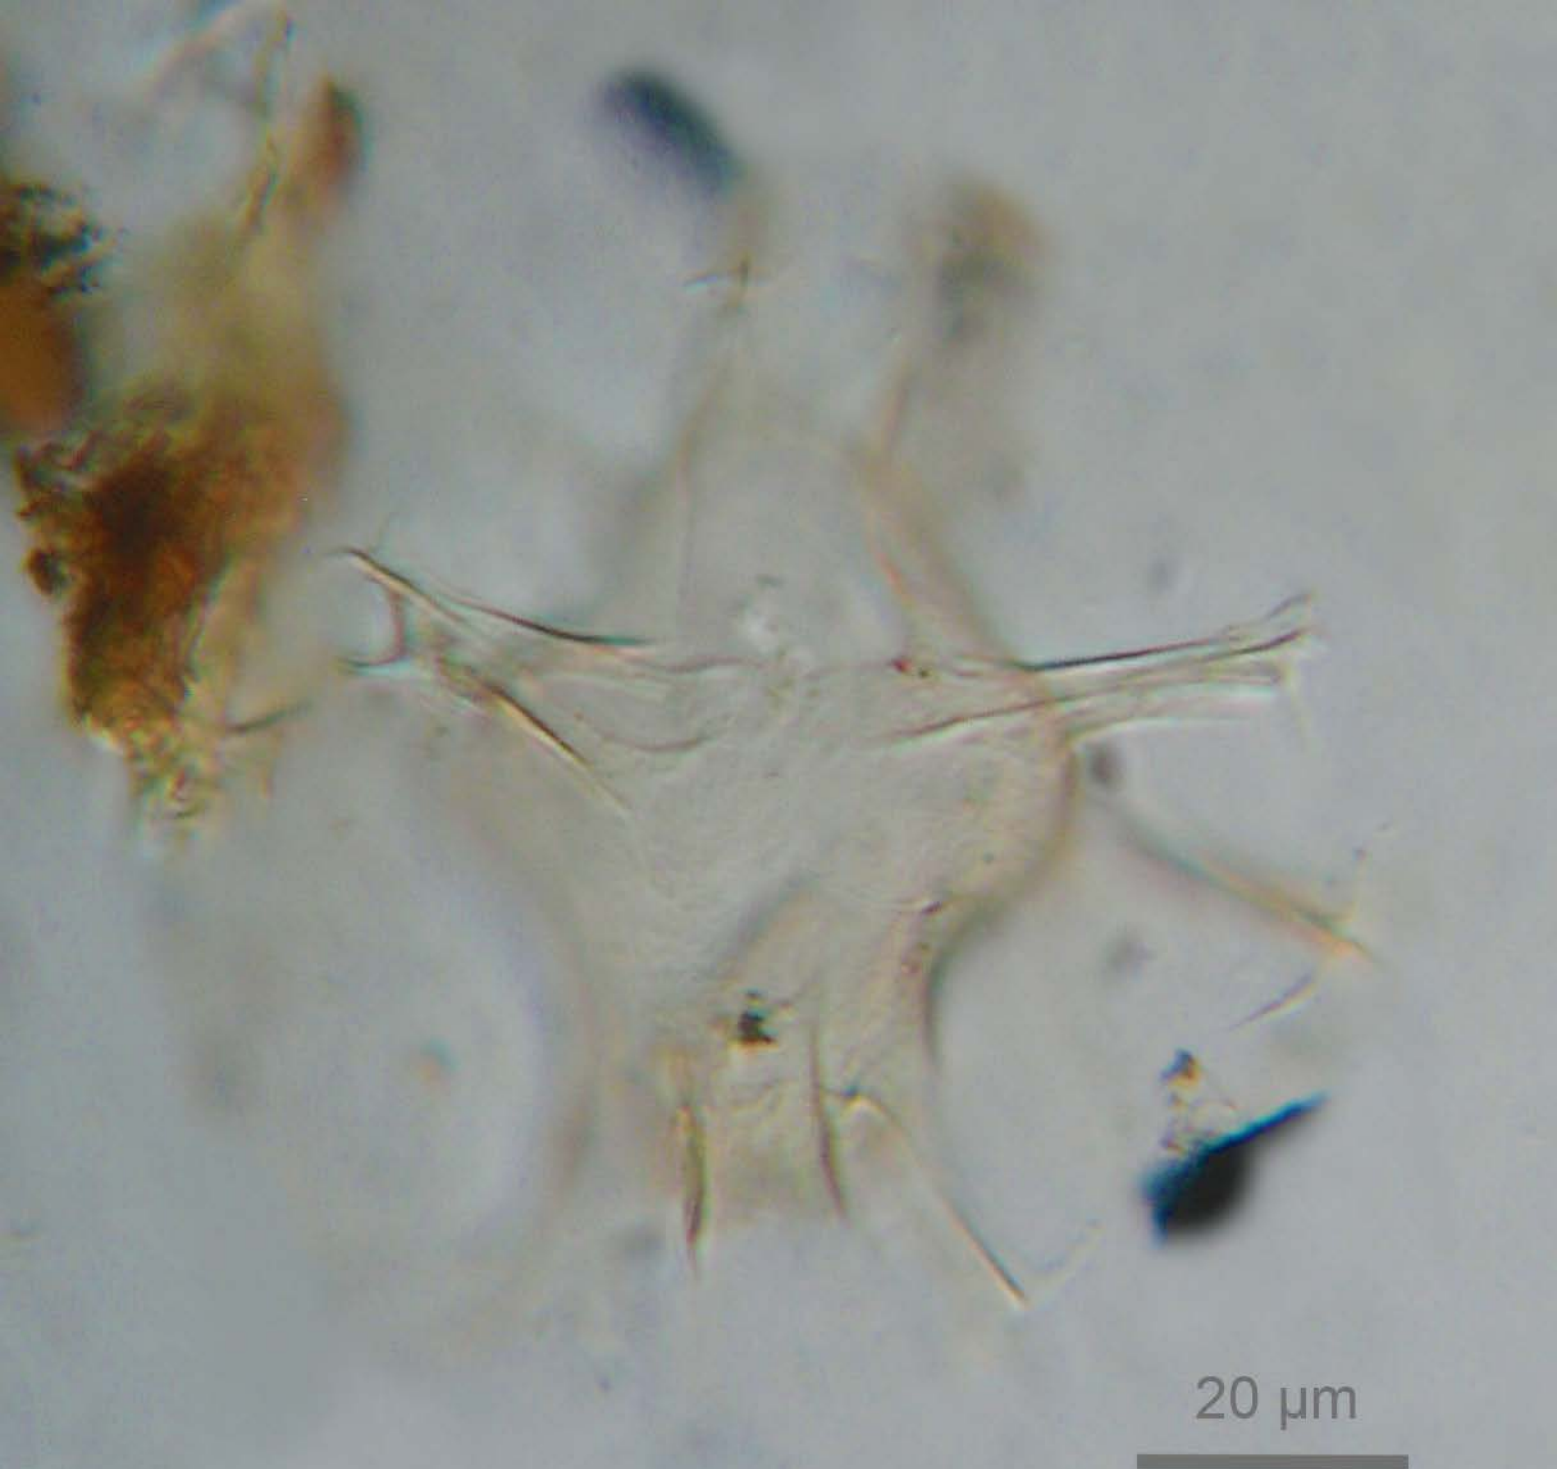

*Spiniferites cruciformis* Wall & Dale 1973 : Marmara Sea

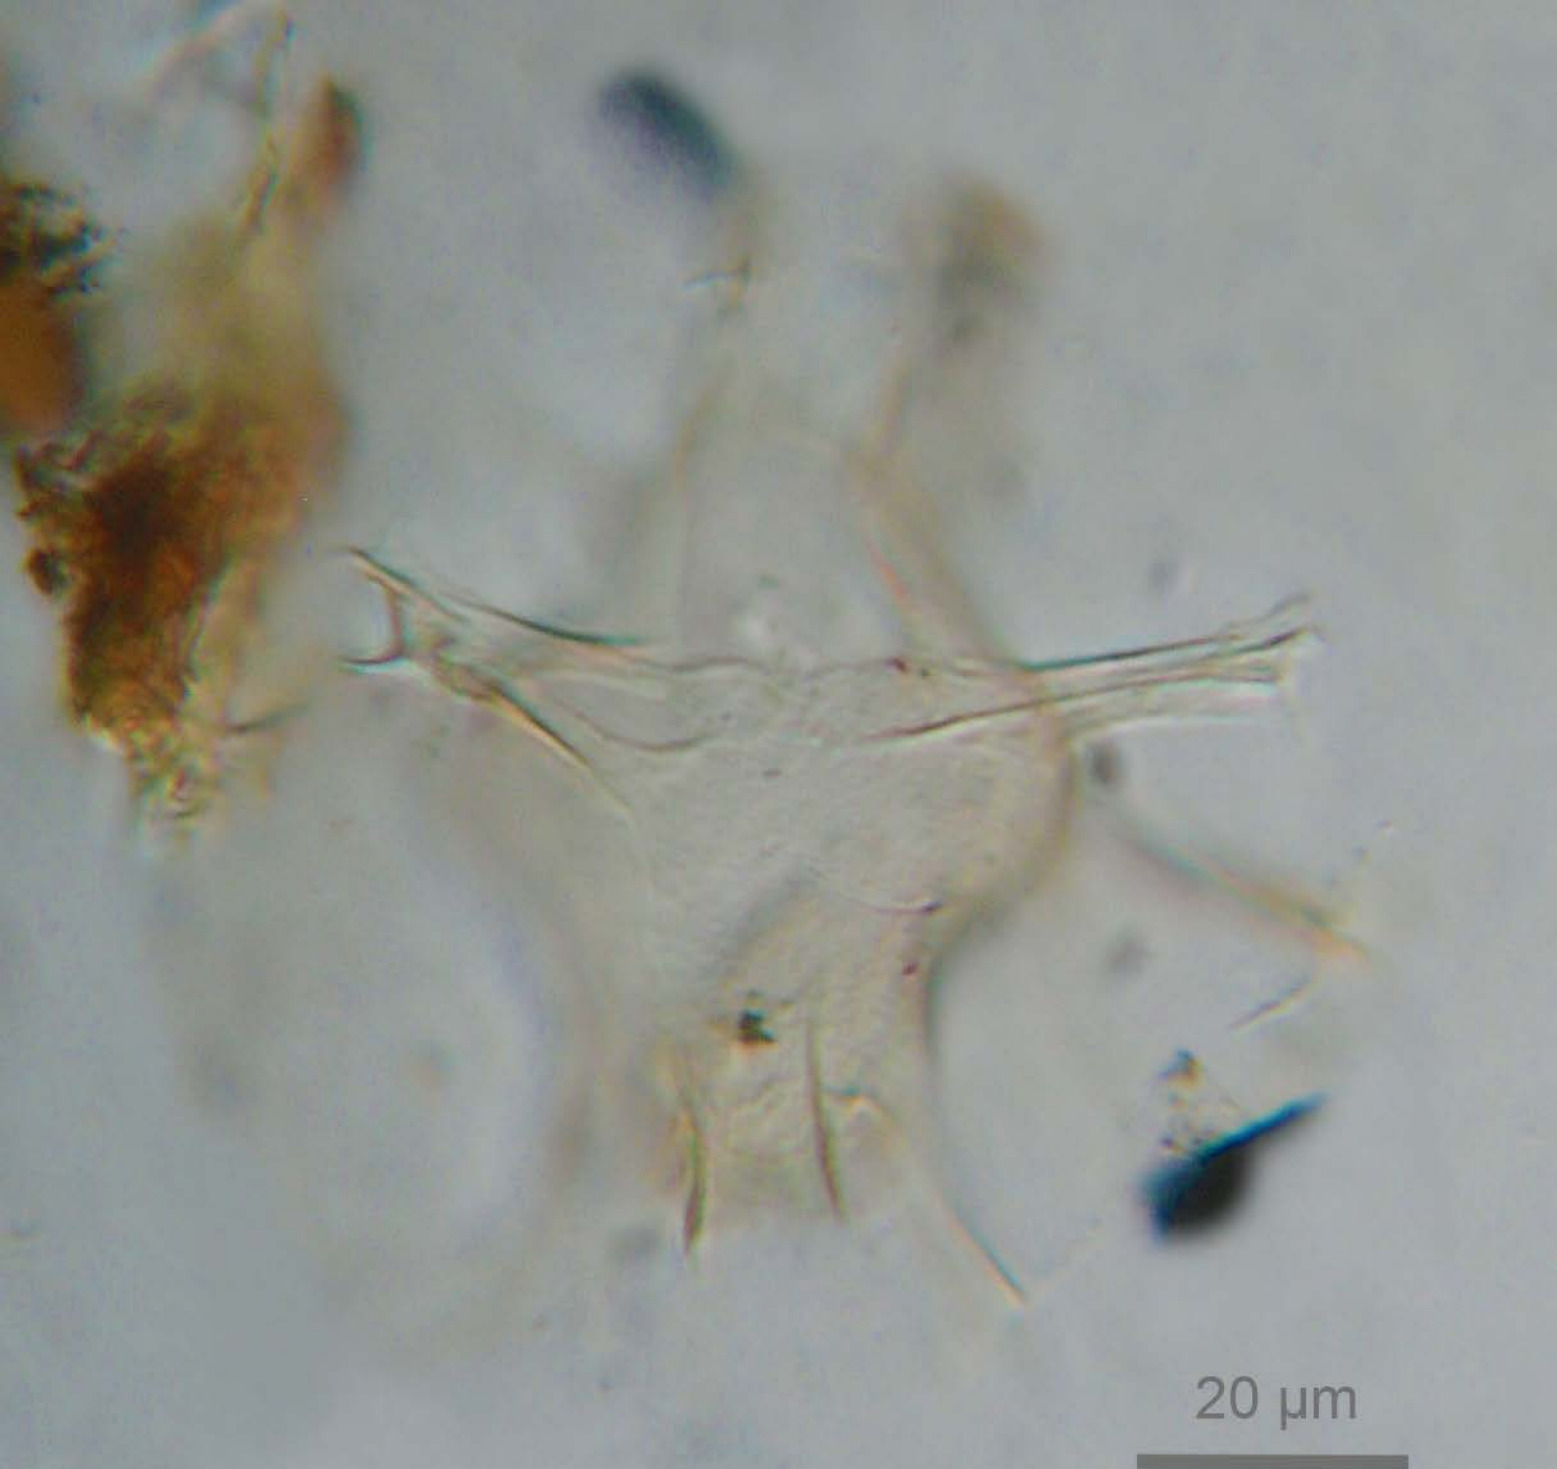

*Spiniferites cruciformis* Wall & Dale 1973 : Marmara Sea

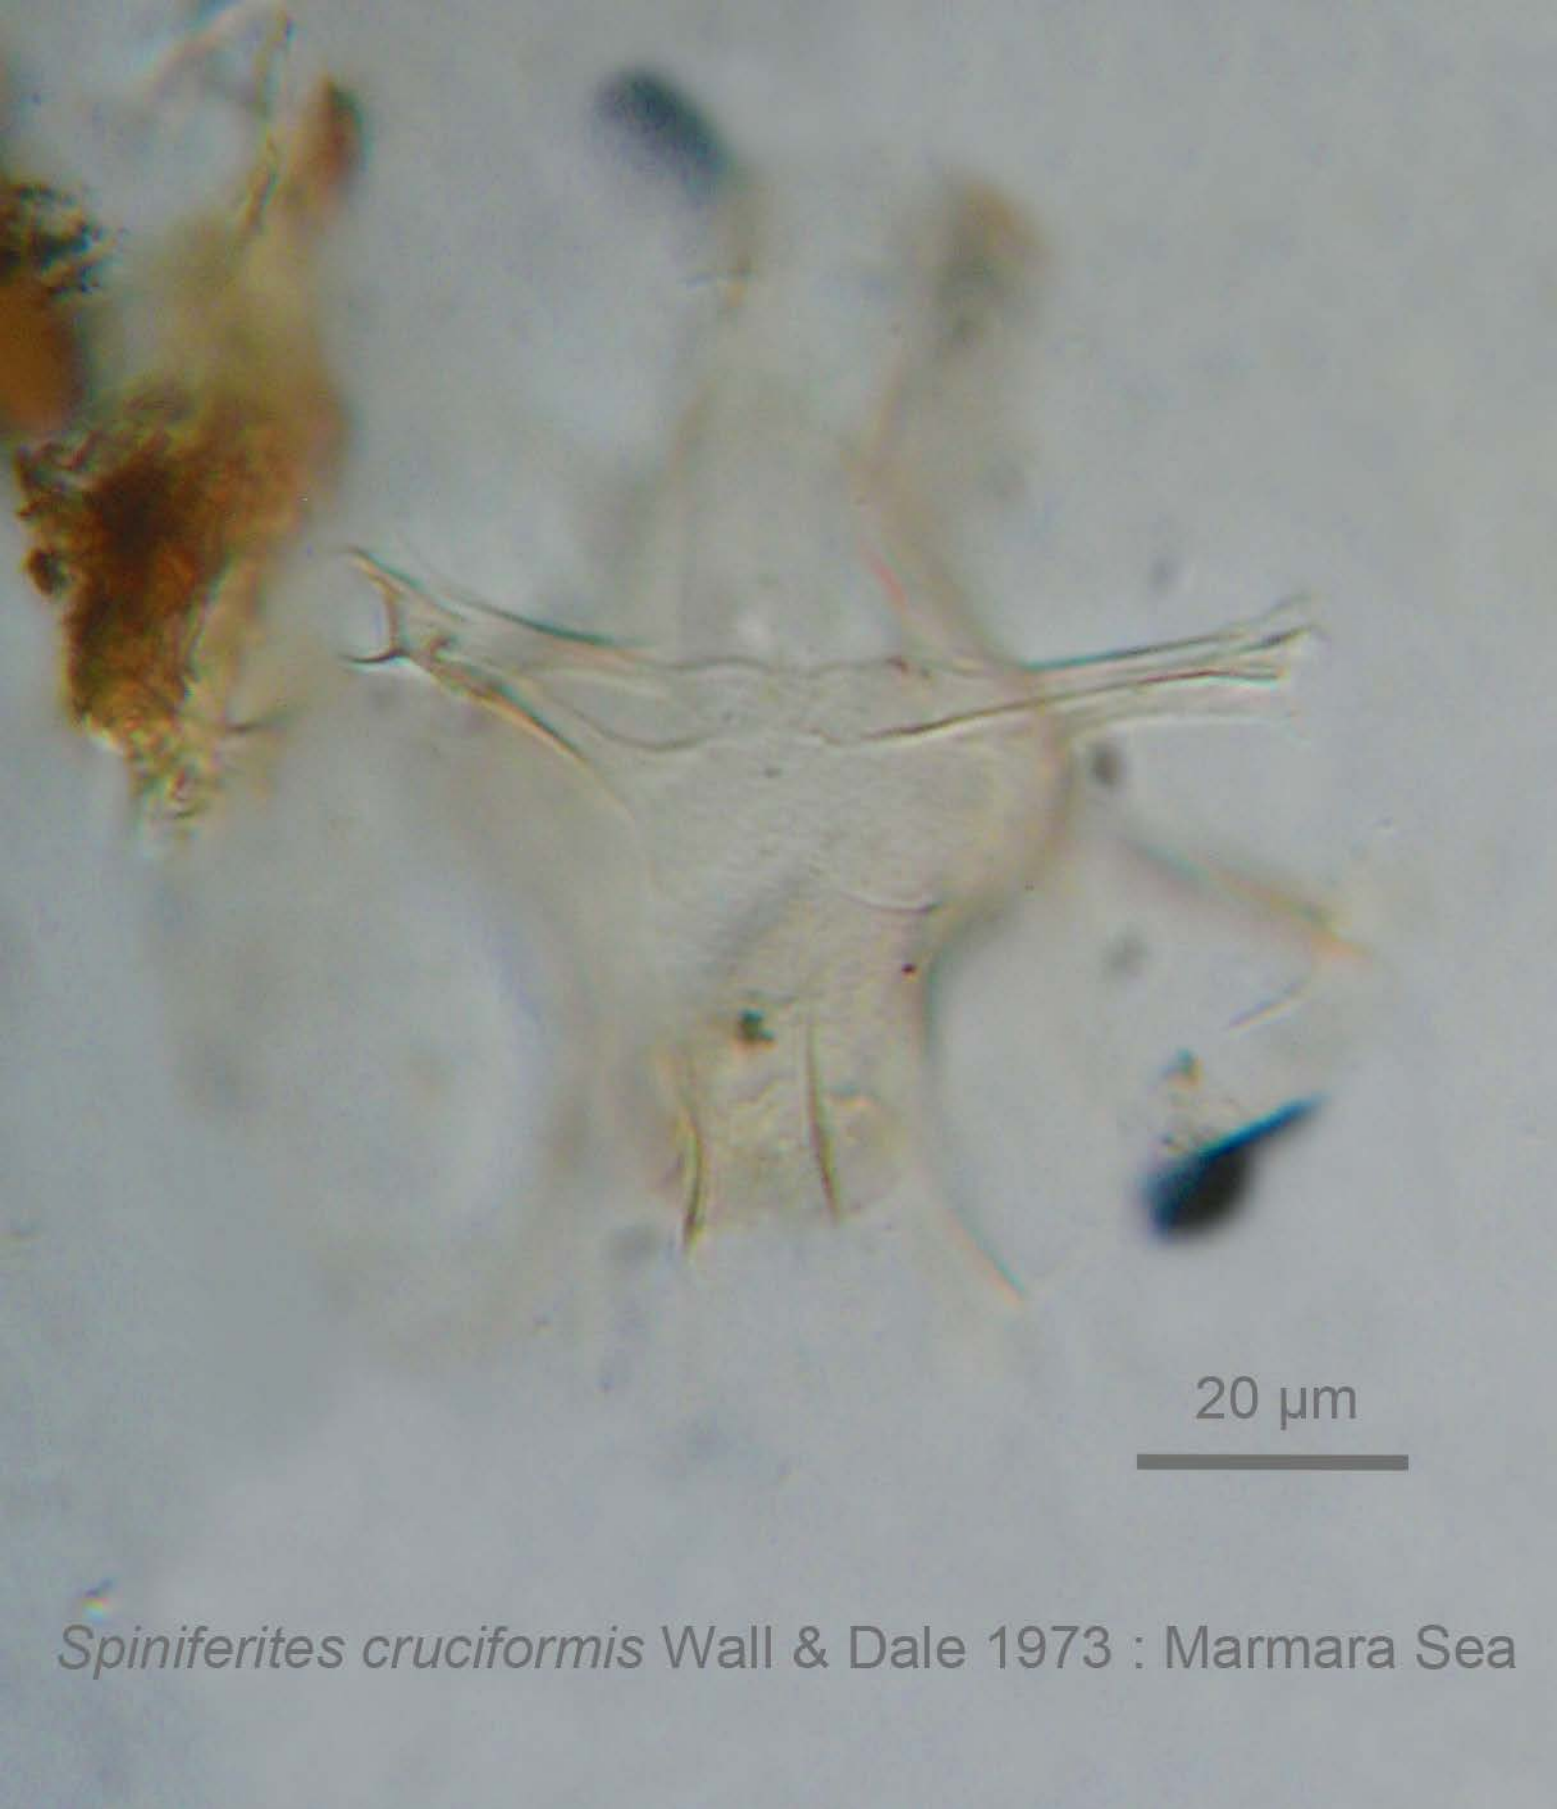

20 µm

*Spiniferites cruciformis* Wall & Dale 1973 : Marmara Sea



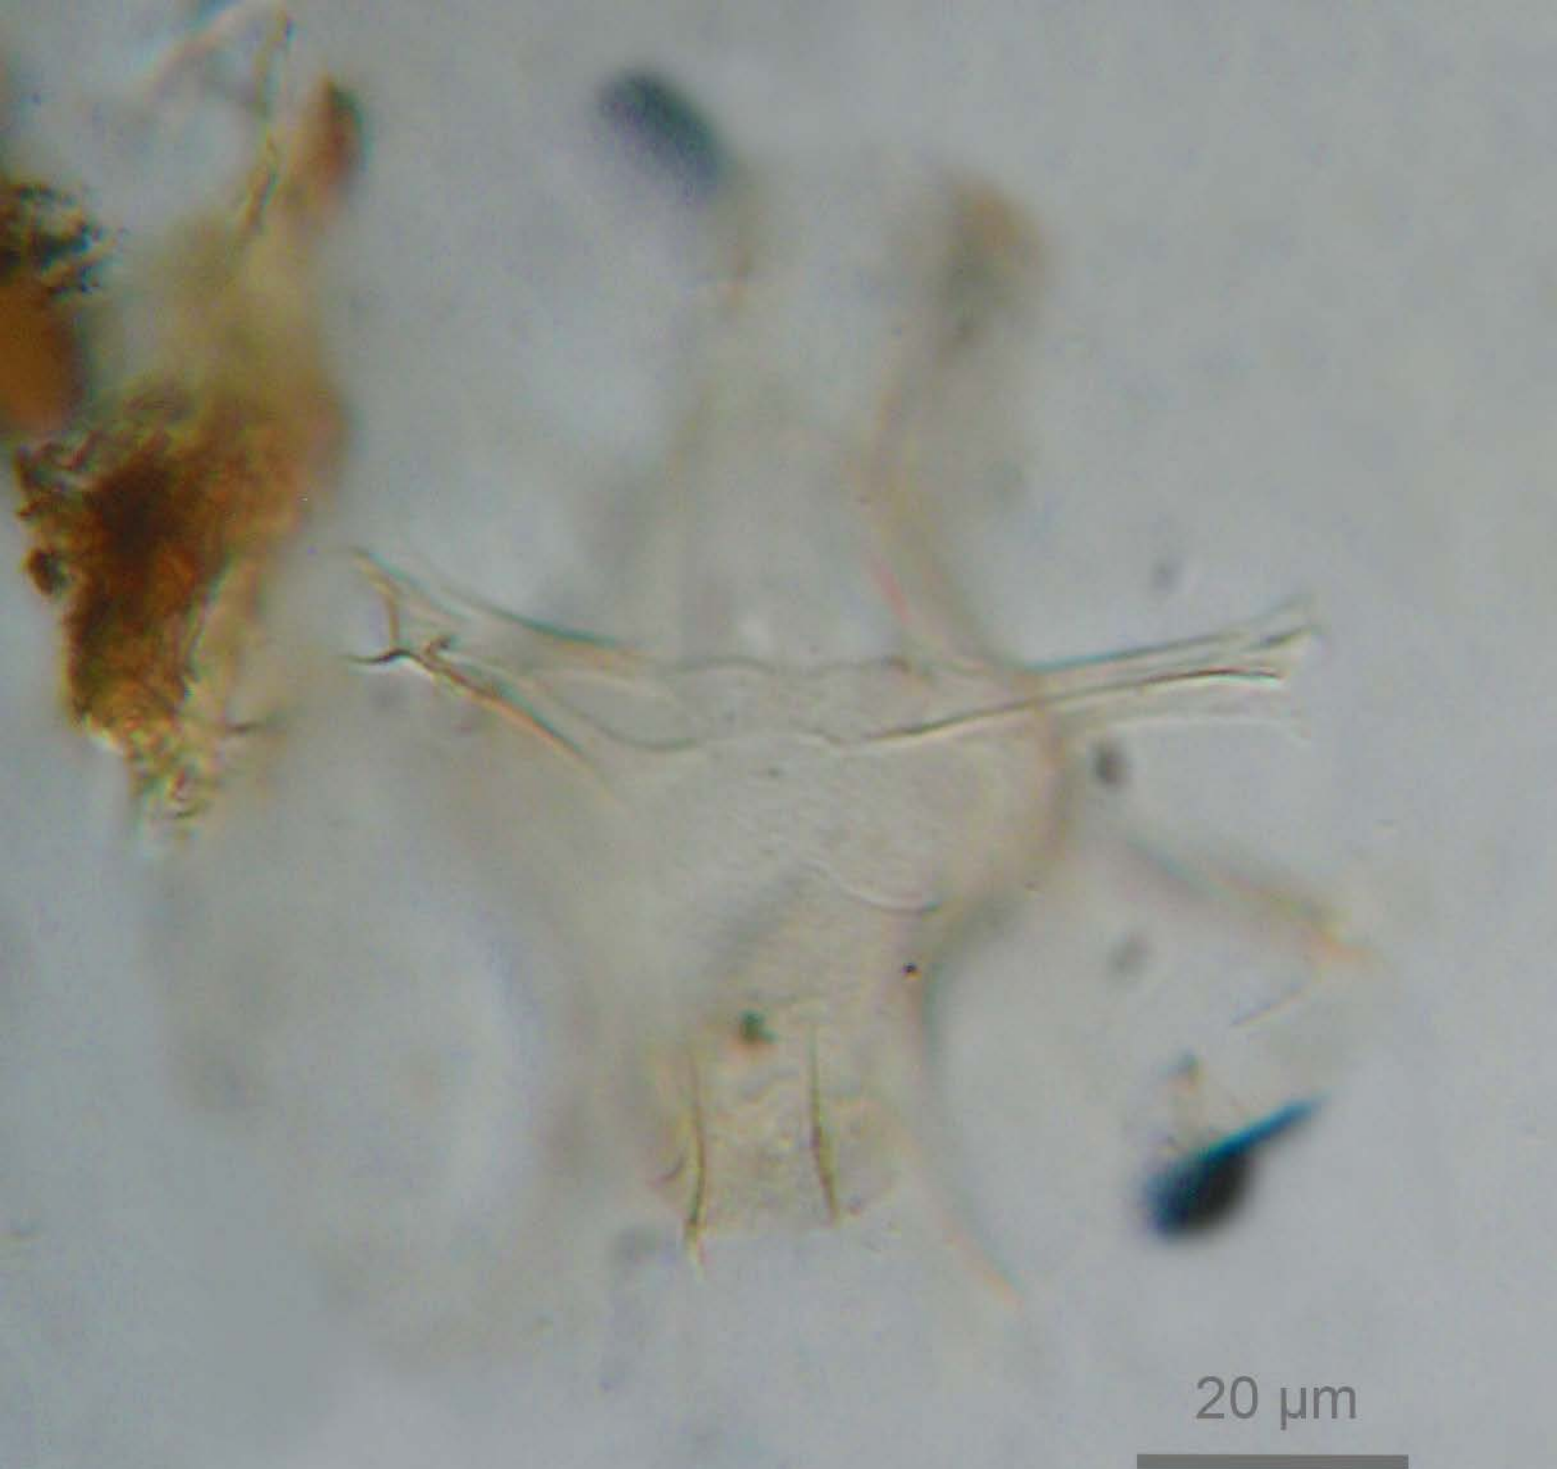

*Spiniferites cruciformis* Wall & Dale 1973 : Marmara Sea

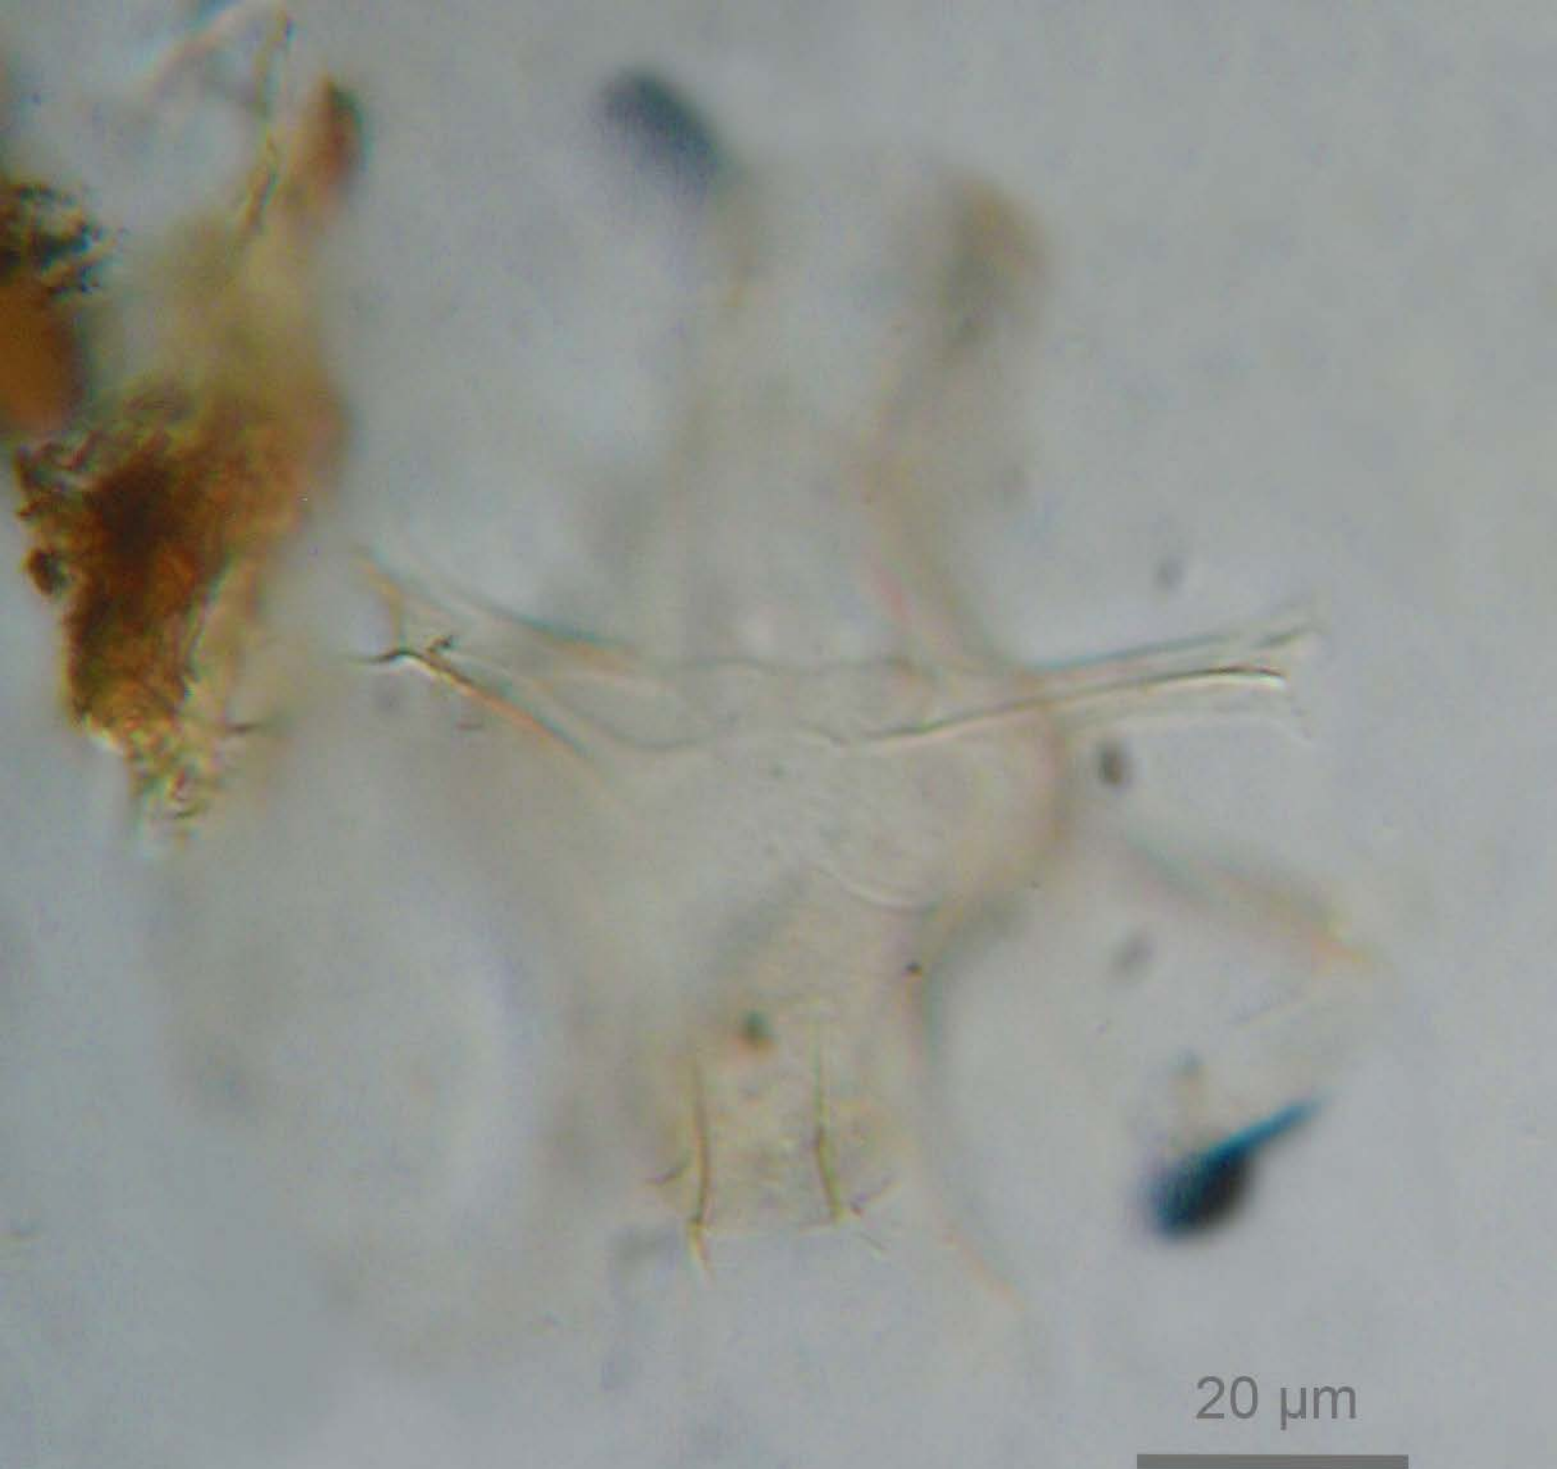

*Spiniferites cruciformis* Wall & Dale 1973 : Marmara Sea

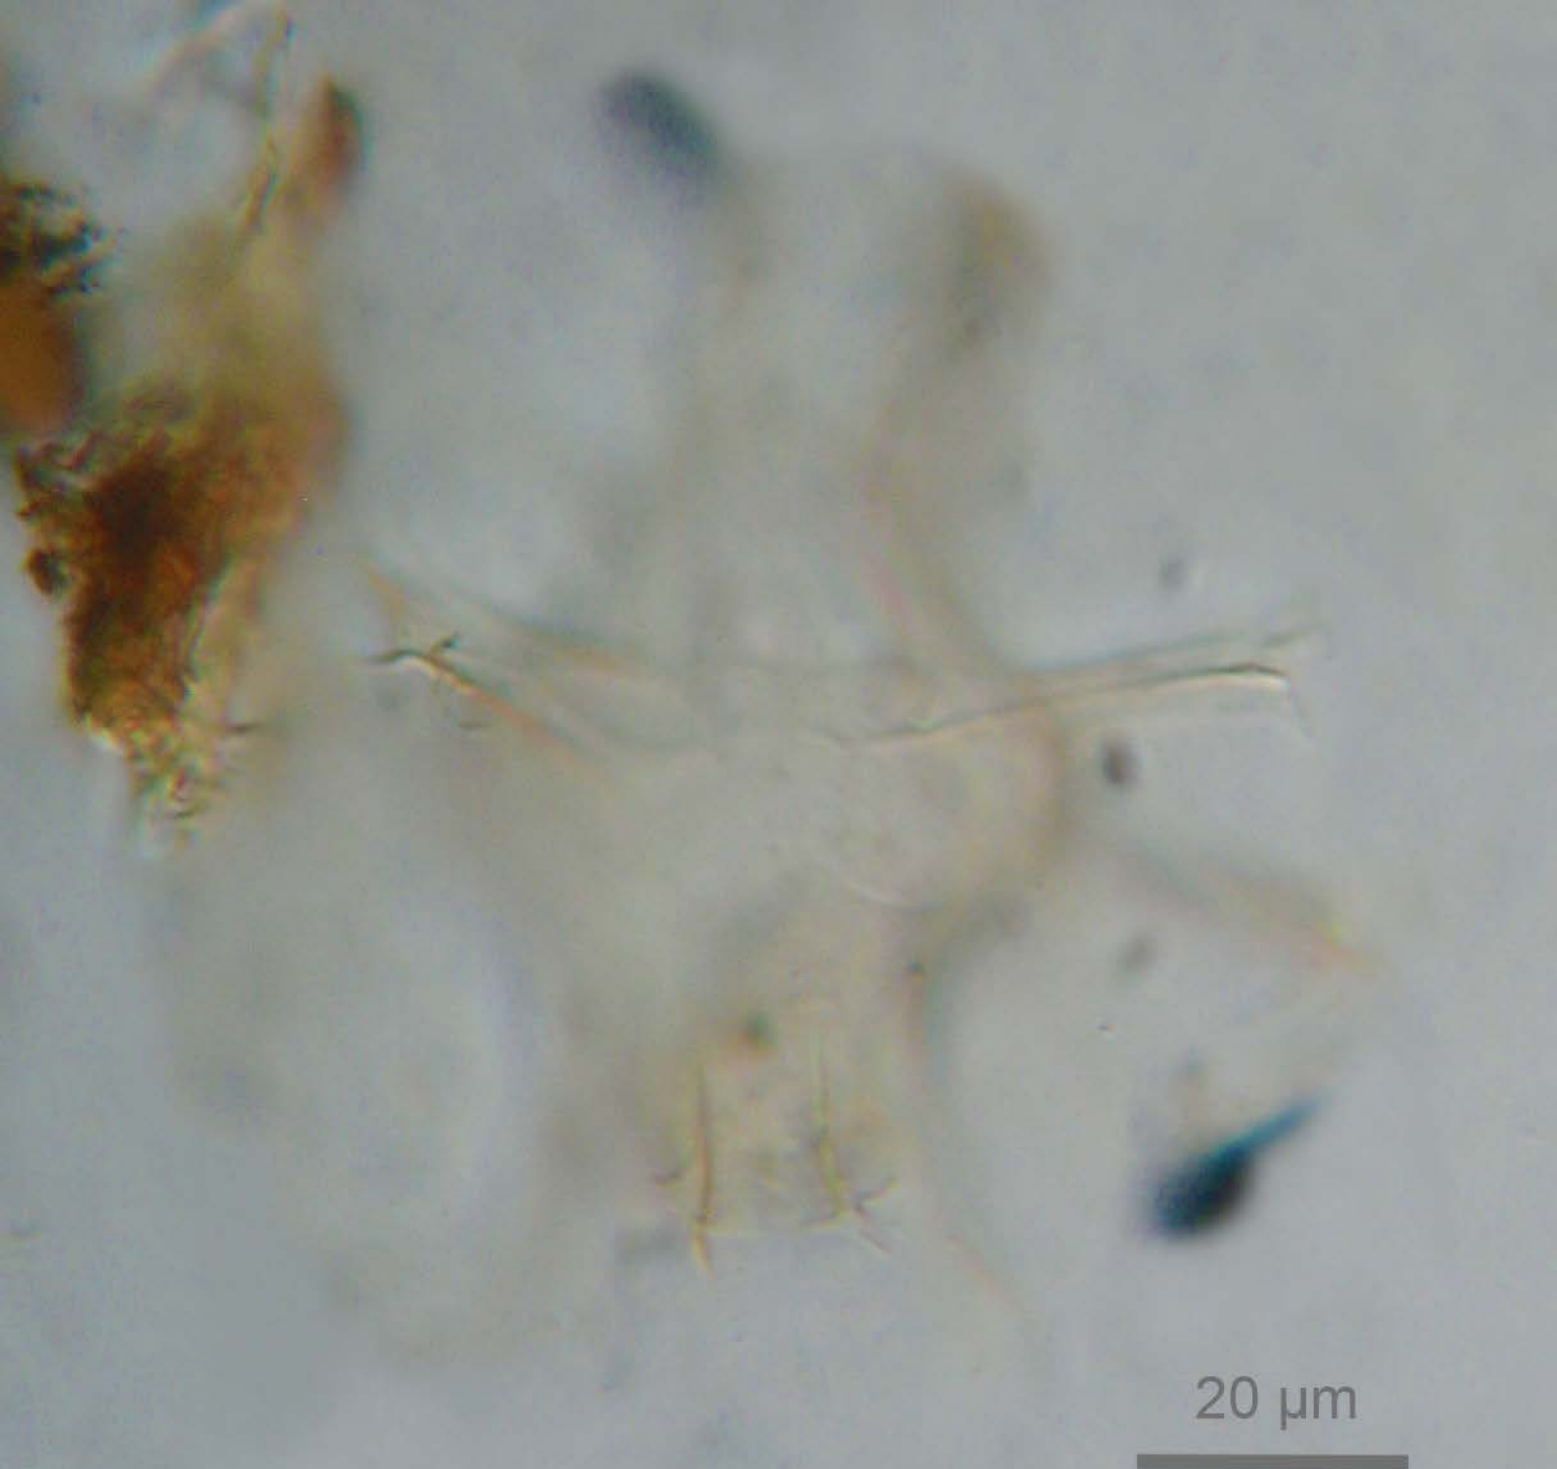

*Spiniferites cruciformis* Wall & Dale 1973 : Marmara Sea



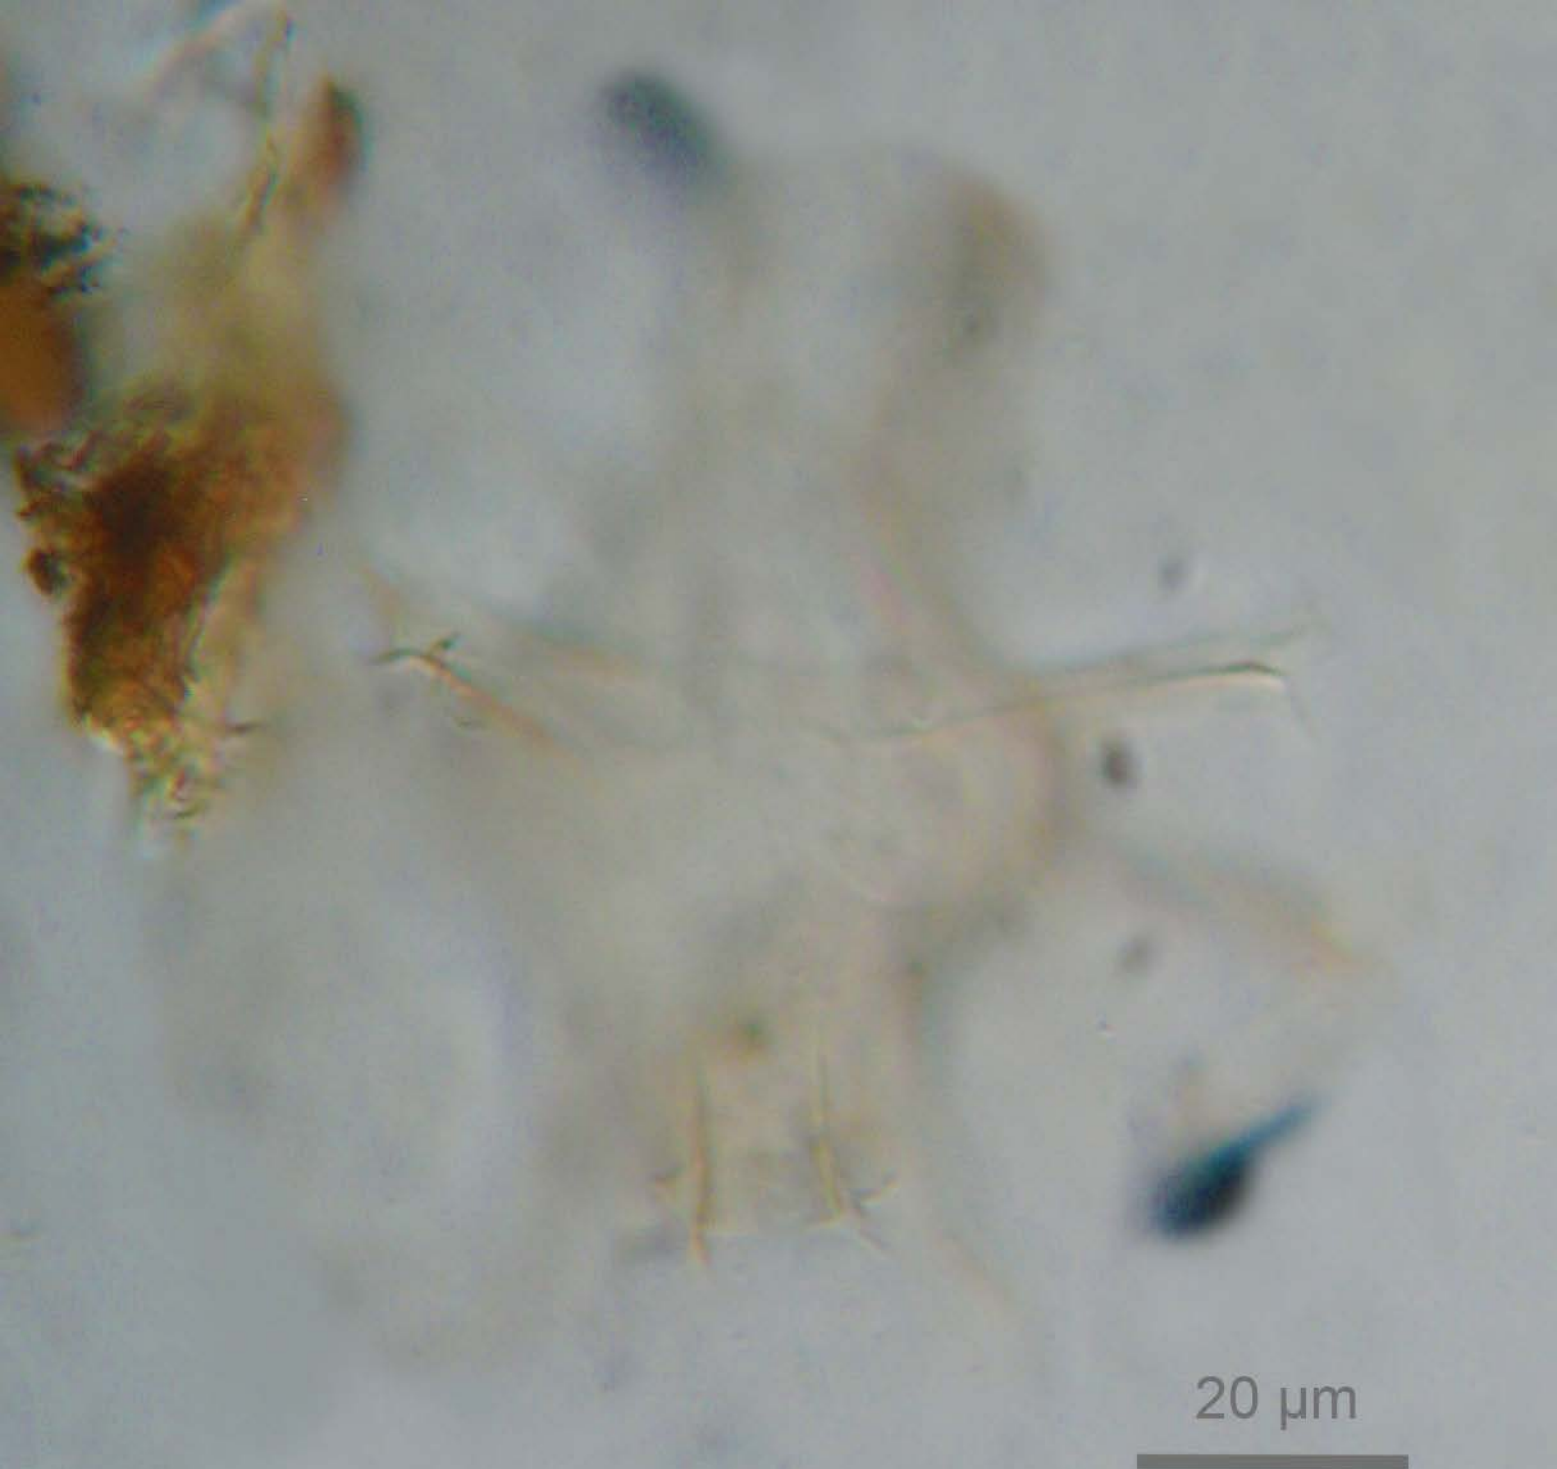

*Spiniferites cruciformis* Wall & Dale 1973 : Marmara Sea
