# Supplementary material
Source: publisher figshare collection journal article supplement (https://tandf.figshare.com/articles/dataset/_/7466618)
Supplement: Supplementary file 10 [file 1]

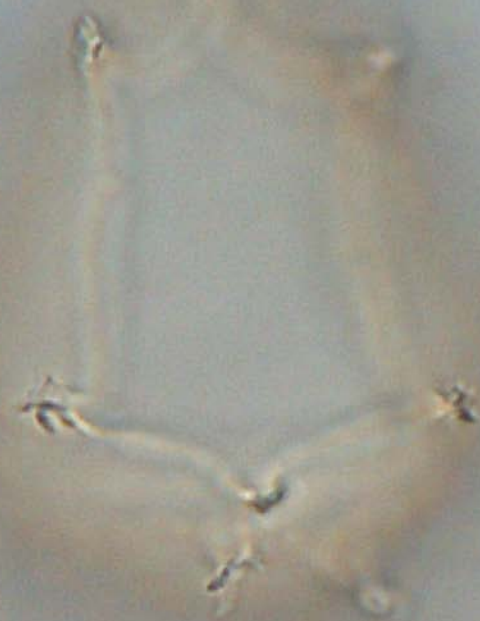

20  $\mu\text{m}$

---

*Spiniferites multisphaerus* Price & Pospelova 2014  
holotype

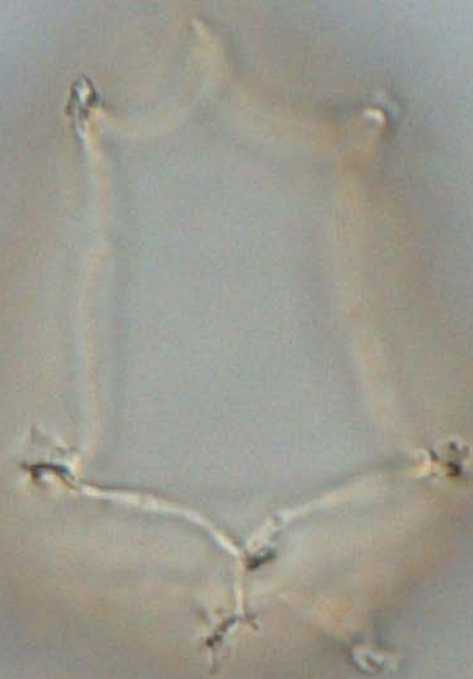

20  $\mu\text{m}$

---

*Spiniferites multisphaerus* Price & Pospelova 2014  
holotype

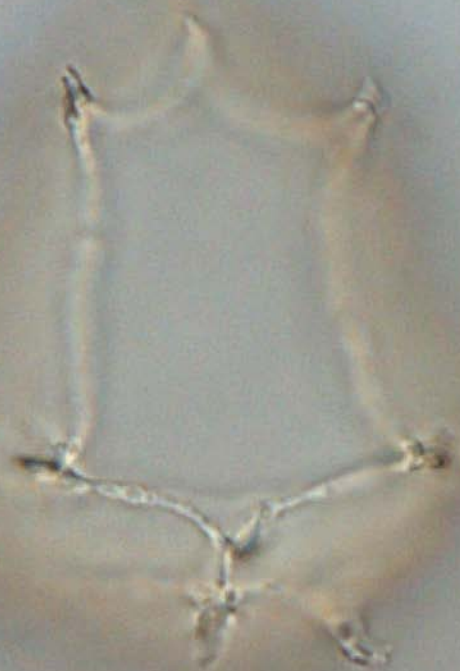

20  $\mu\text{m}$

---

*Spiniferites multisphaerus* Price & Pospelova 2014  
holotype



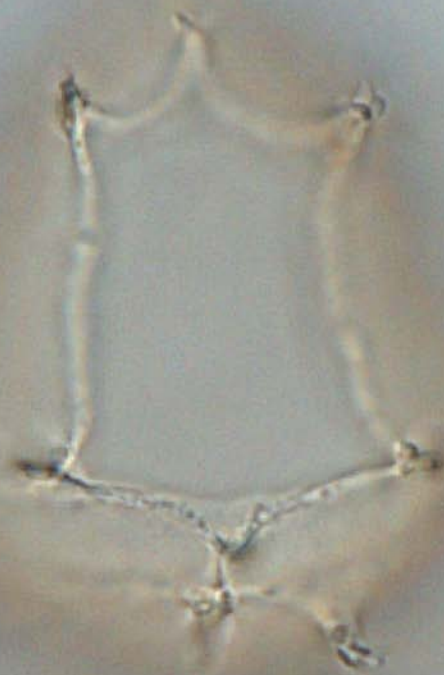

20  $\mu\text{m}$

---

*Spiniferites multisphaerus* Price & Pospelova 2014  
holotype

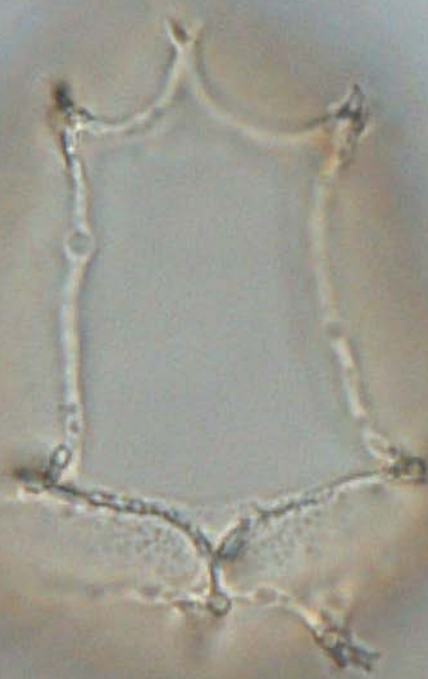

20  $\mu\text{m}$

---

*Spiniferites multisphaerus* Price & Pospelova 2014  
holotype

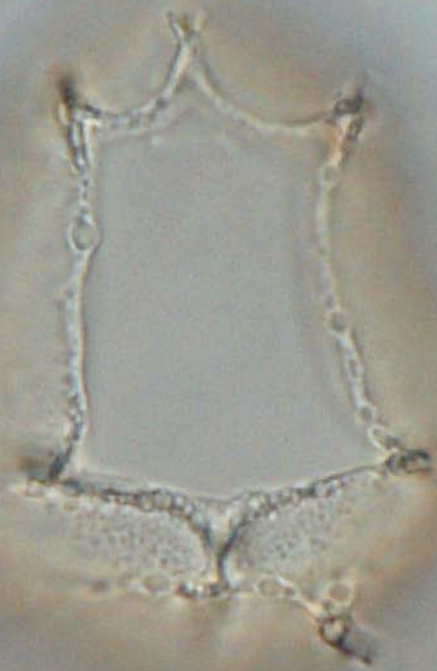

20  $\mu\text{m}$

---

*Spiniferites multisphaerus* Price & Pospelova 2014  
holotype



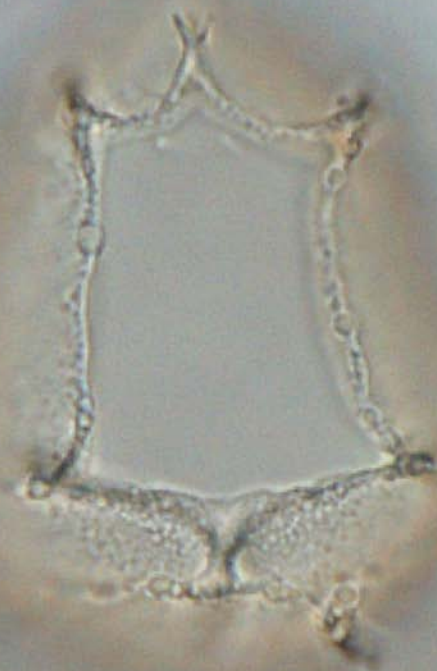

20  $\mu\text{m}$

---

*Spiniferites multisphaerus* Price & Pospelova 2014  
holotype

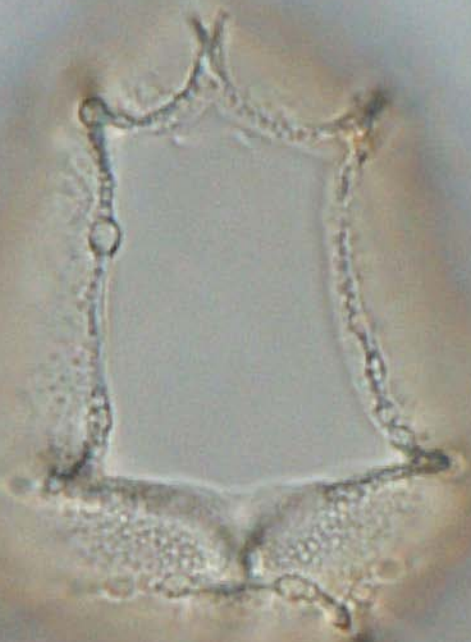

20  $\mu\text{m}$

*Spiniferites multisphaerus* Price & Pospelova 2014  
holotype



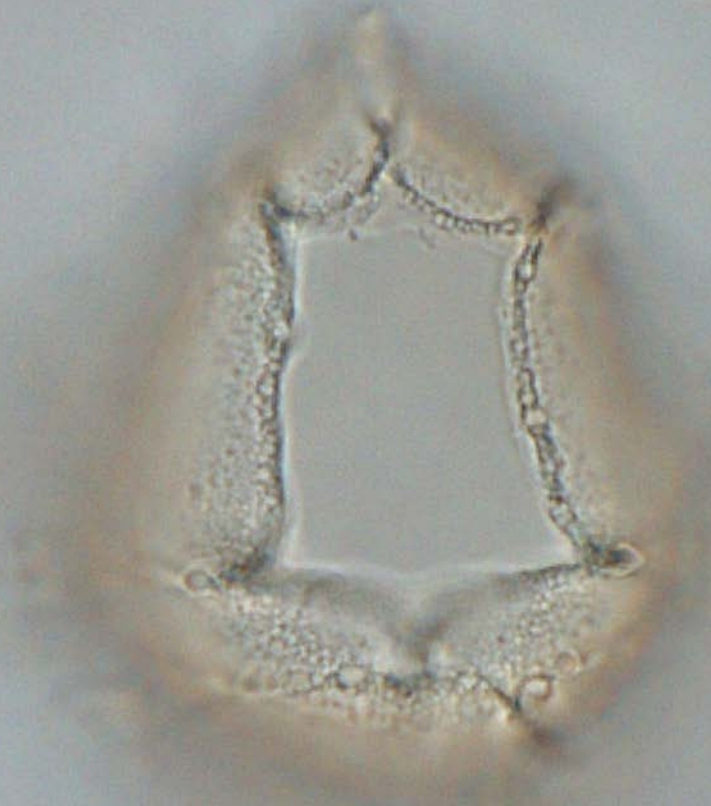

20  $\mu\text{m}$

---

*Spiniferites multisphaerus* Price & Pospelova 2014  
holotype

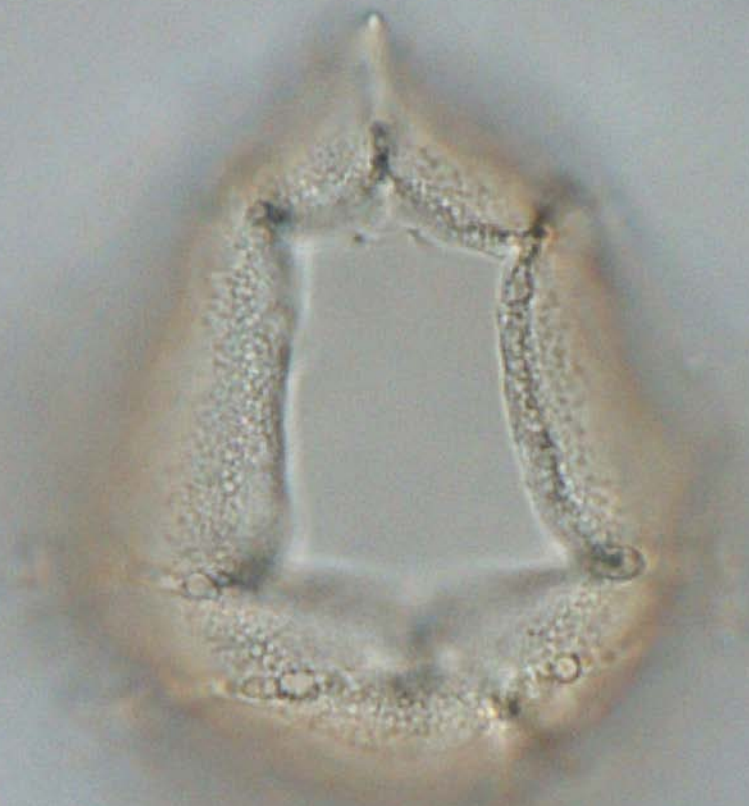

20  $\mu\text{m}$

*Spiniferites multisphaerus* Price & Pospelova 2014  
holotype

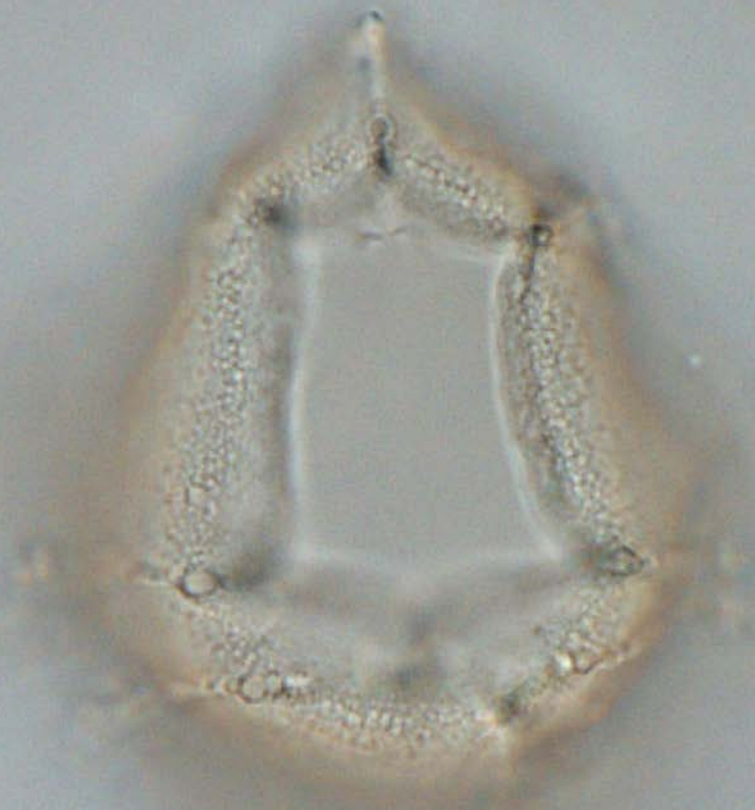

20  $\mu\text{m}$

*Spiniferites multisphaerus* Price & Pospelova 2014  
holotype



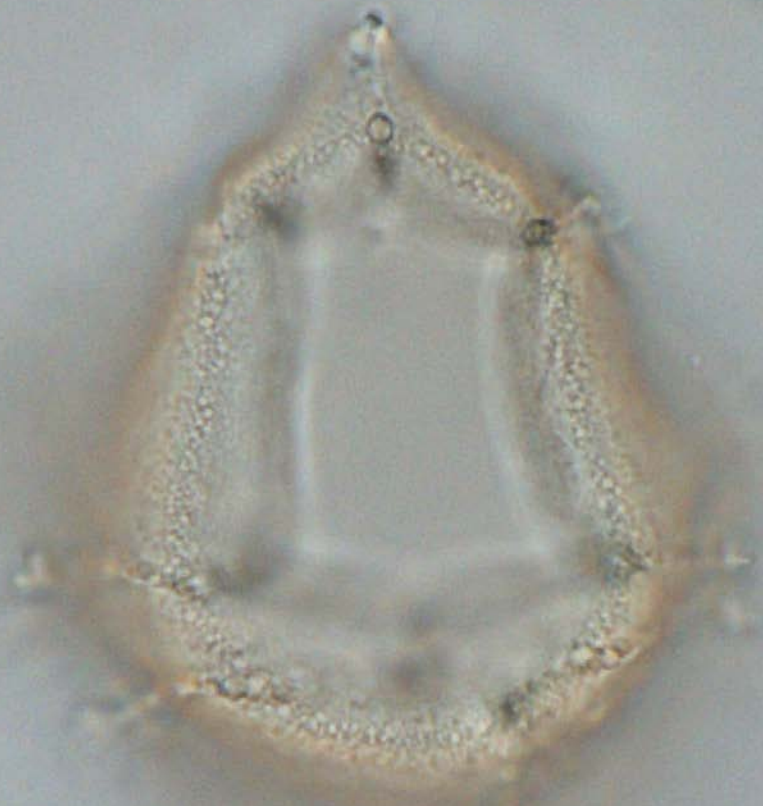

20  $\mu\text{m}$

*Spiniferites multisphaerus* Price & Pospelova 2014  
holotype

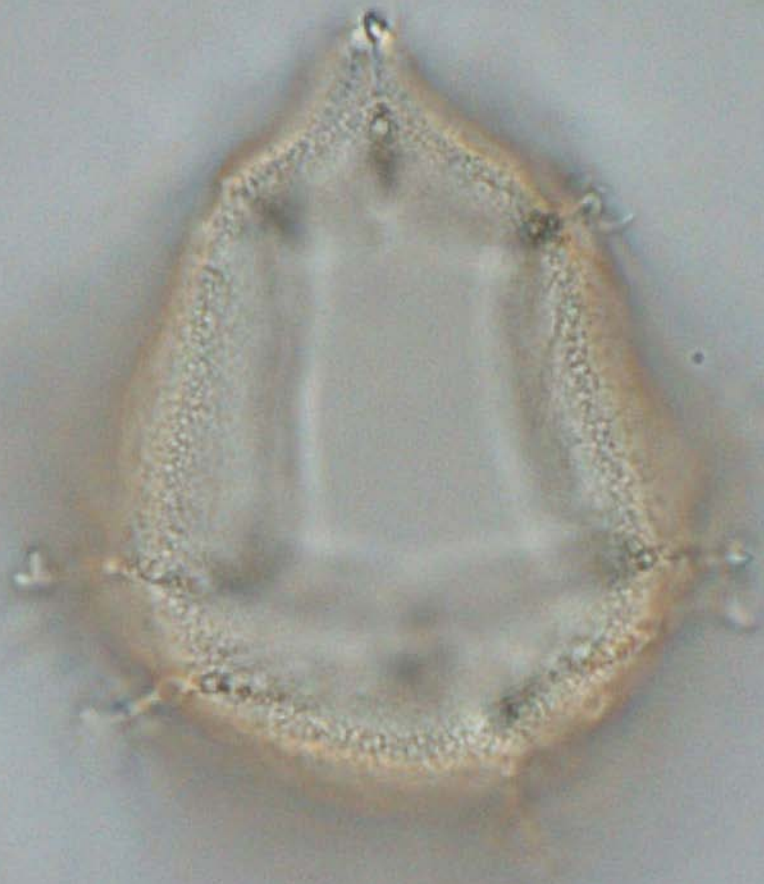

20  $\mu\text{m}$

*Spiniferites multisphaerus* Price & Pospelova 2014  
holotype

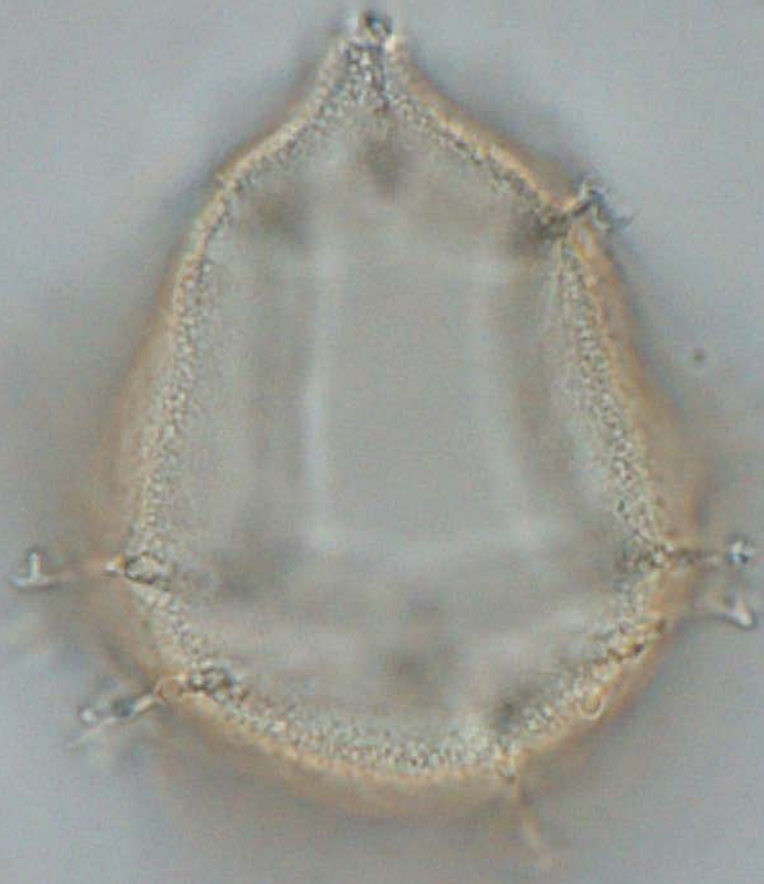

20  $\mu\text{m}$

*Spiniferites multisphaerus* Price & Pospelova 2014  
holotype



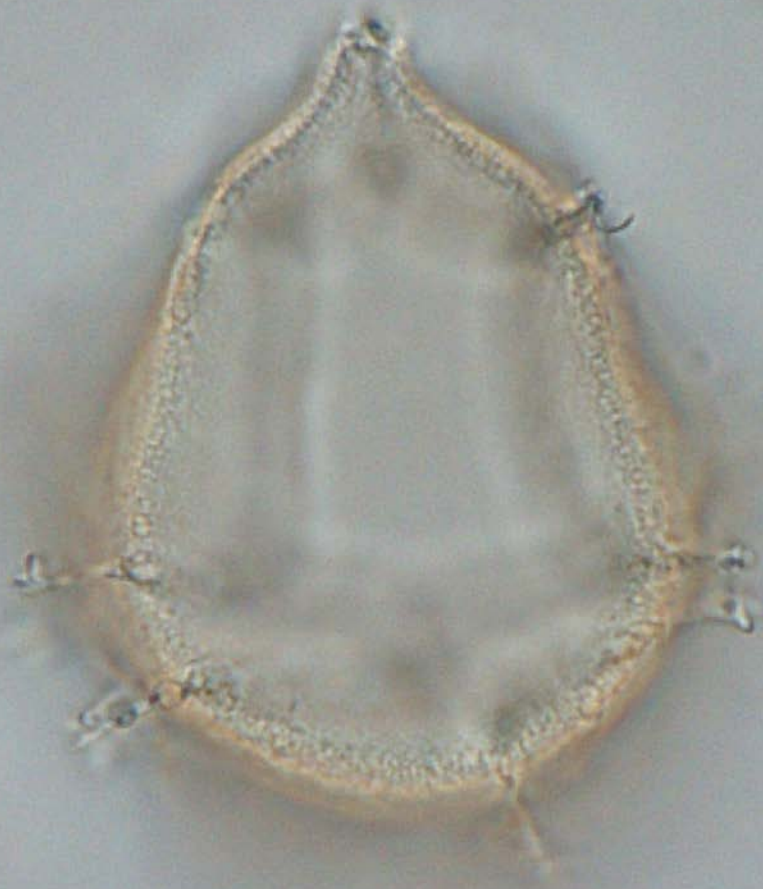

20  $\mu\text{m}$

*Spiniferites multisphaerus* Price & Pospelova 2014  
holotype

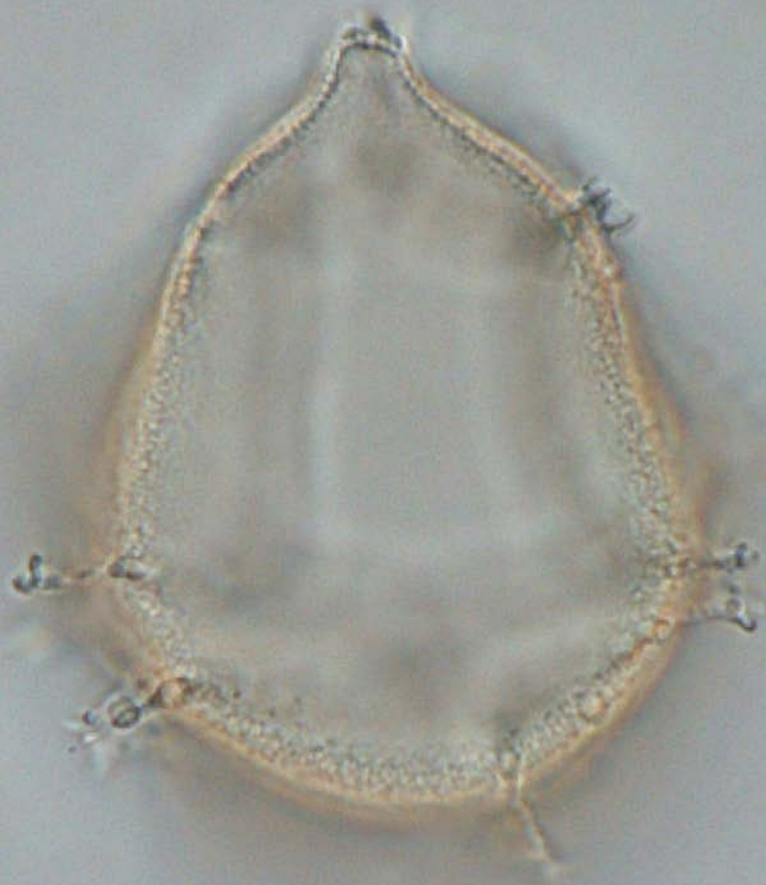

20  $\mu\text{m}$

---

*Spiniferites multisphaerus* Price & Pospelova 2014  
holotype

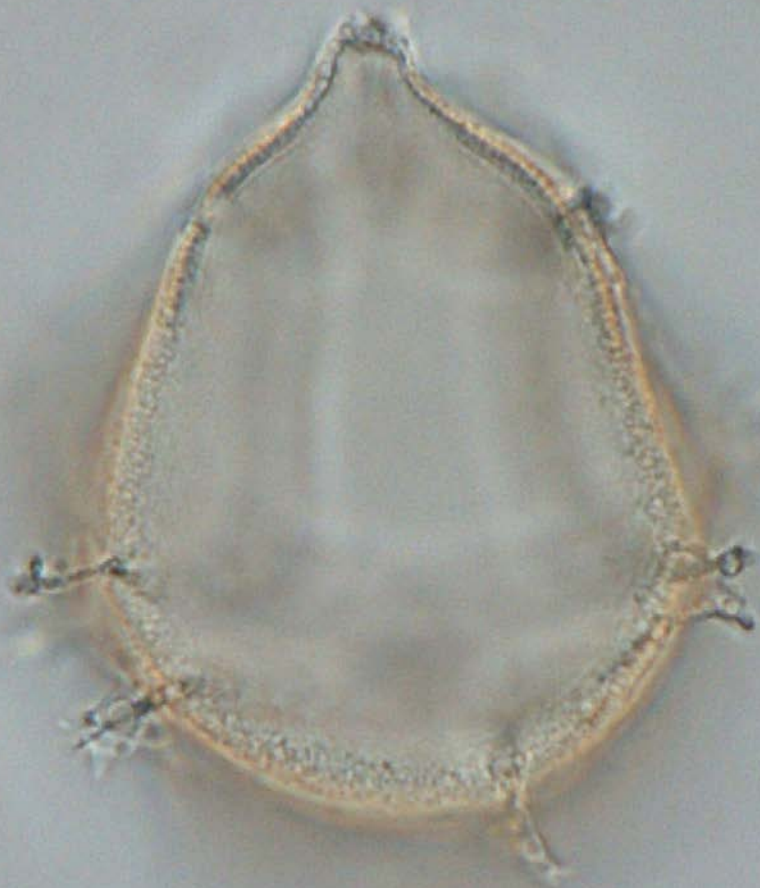

20  $\mu\text{m}$

*Spiniferites multisphaerus* Price & Pospelova 2014  
holotype



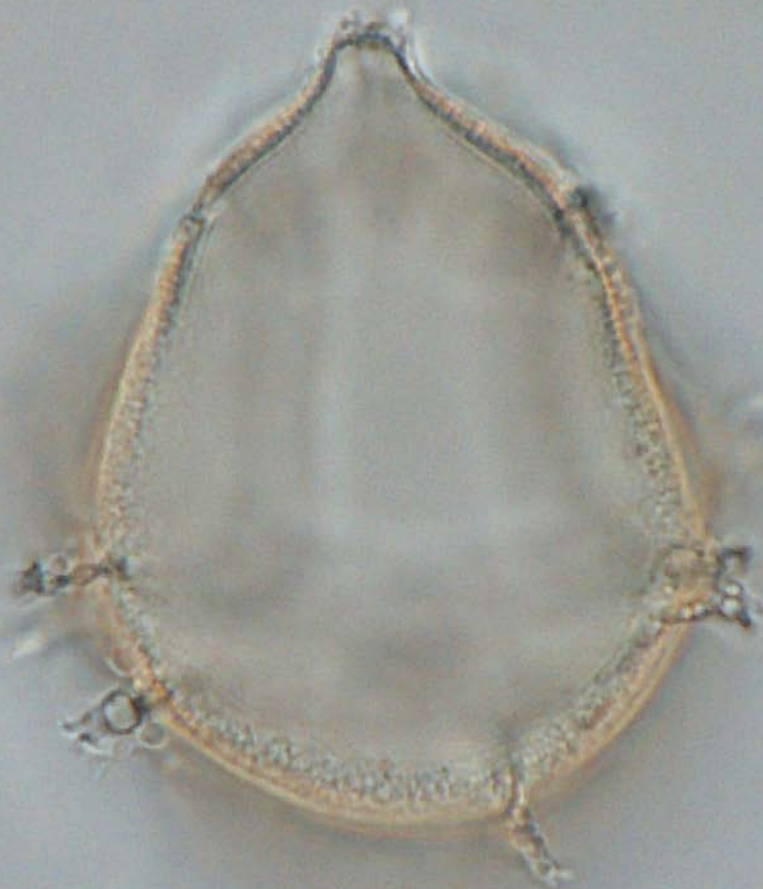

20  $\mu\text{m}$

---

*Spiniferites multisphaerus* Price & Pospelova 2014  
holotype

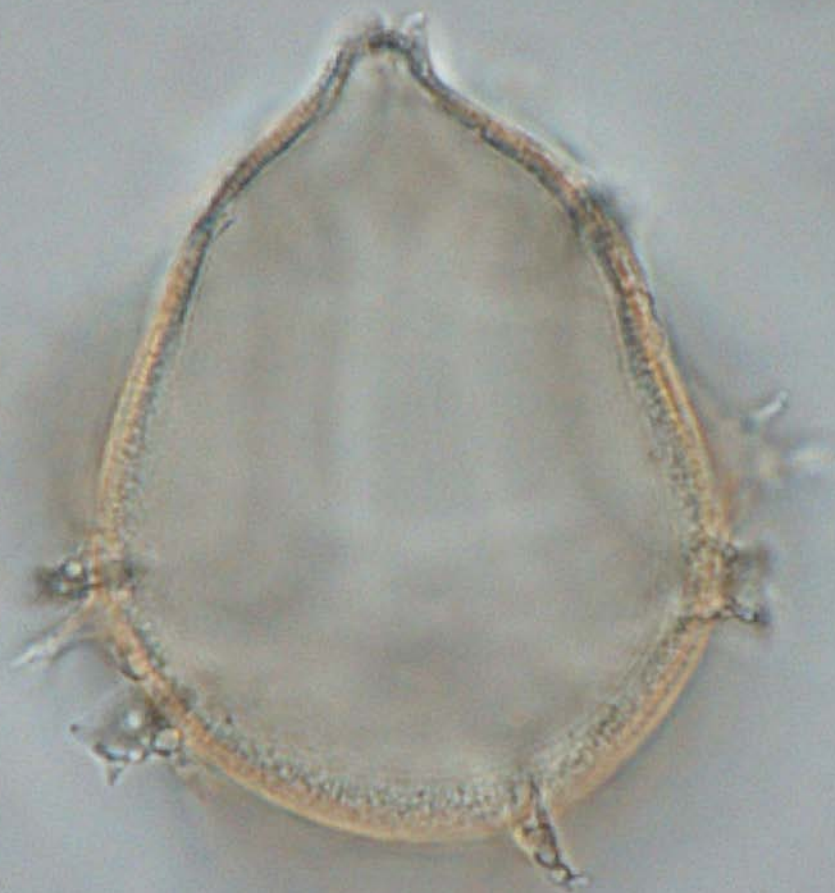

20 μm

*Spiniferites multisphaerus* Price & Pospelova 2014  
holotype

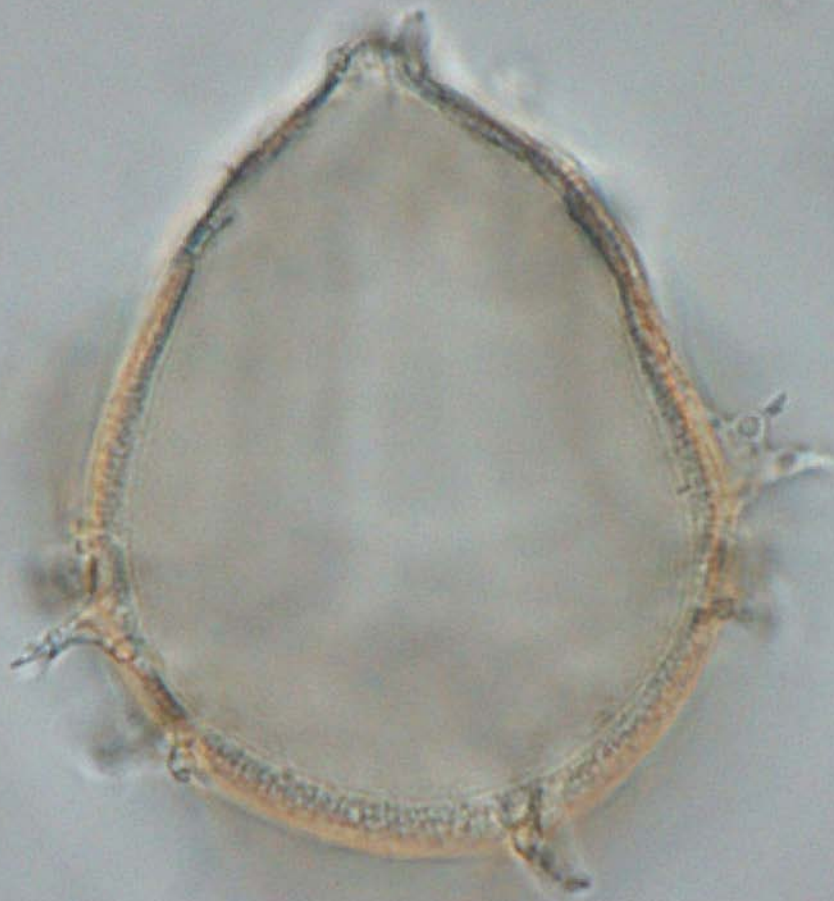

20  $\mu\text{m}$

---

*Spiniferites multisphaerus* Price & Pospelova 2014  
holotype



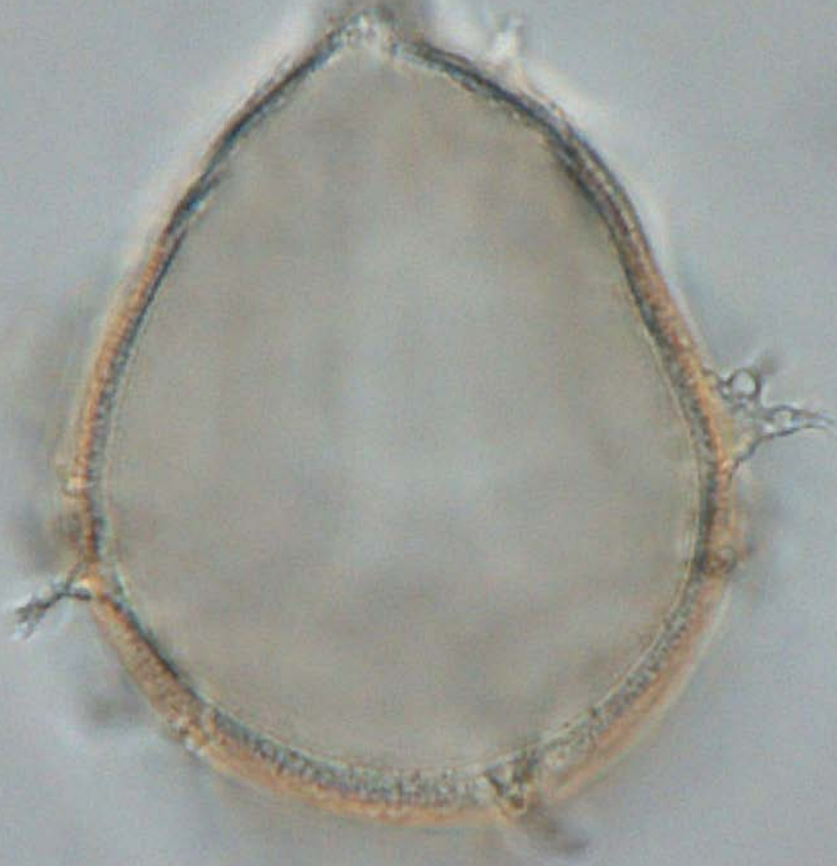

20  $\mu\text{m}$

*Spiniferites multisphaerus* Price & Pospelova 2014  
holotype

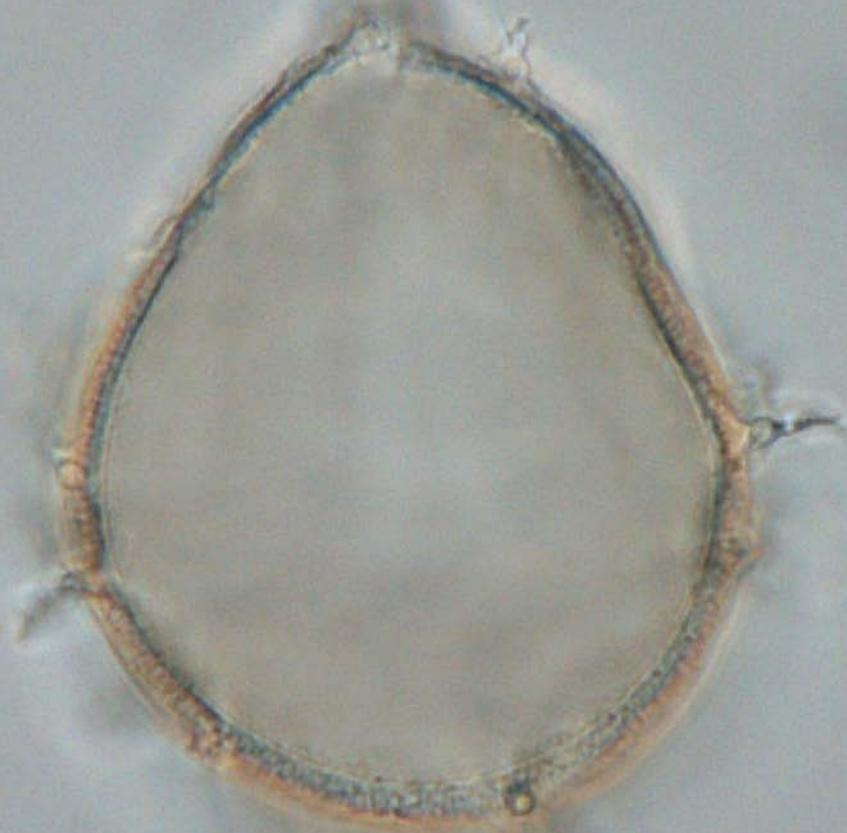

20  $\mu\text{m}$

*Spiniferites multisphaerus* Price & Pospelova 2014  
holotype

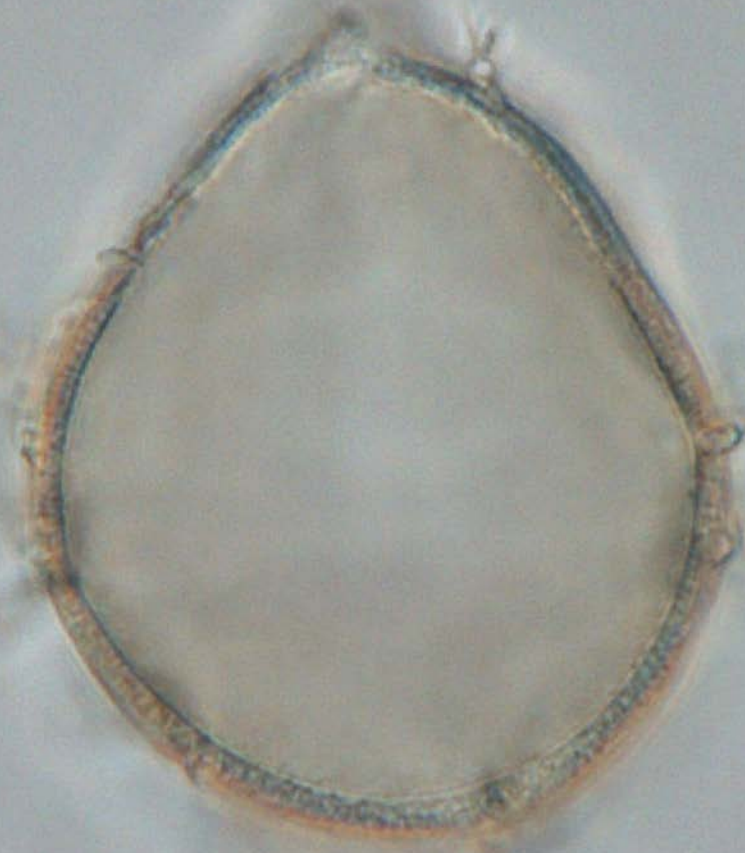

20  $\mu\text{m}$

*Spiniferites multisphaerus* Price & Pospelova 2014  
holotype



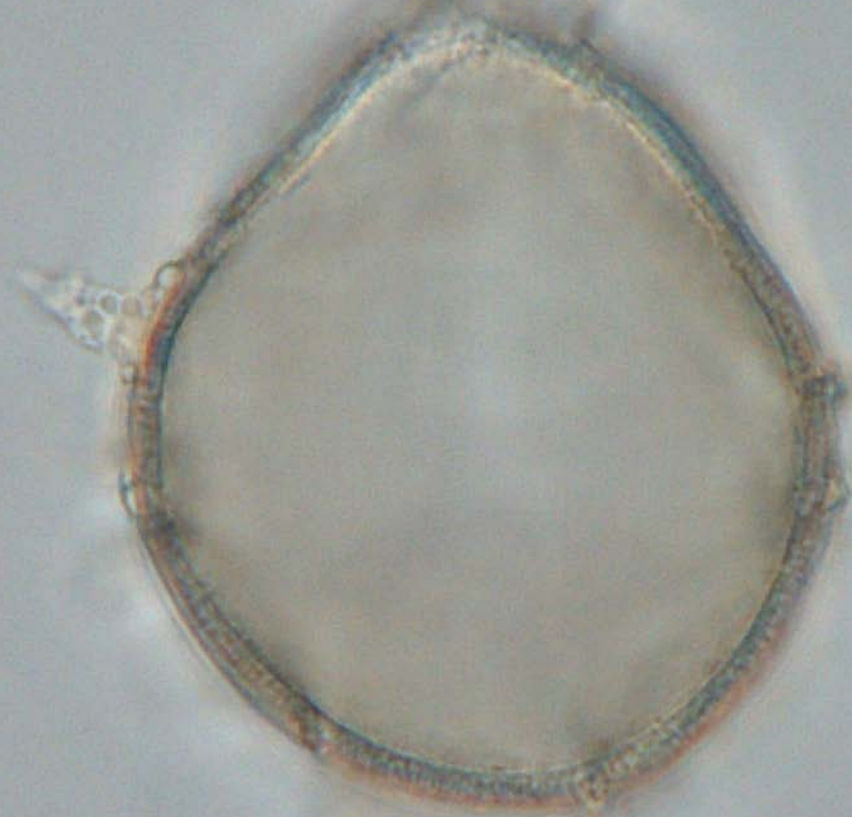

20  $\mu\text{m}$

*Spiniferites multisphaerus* Price & Pospelova 2014  
holotype

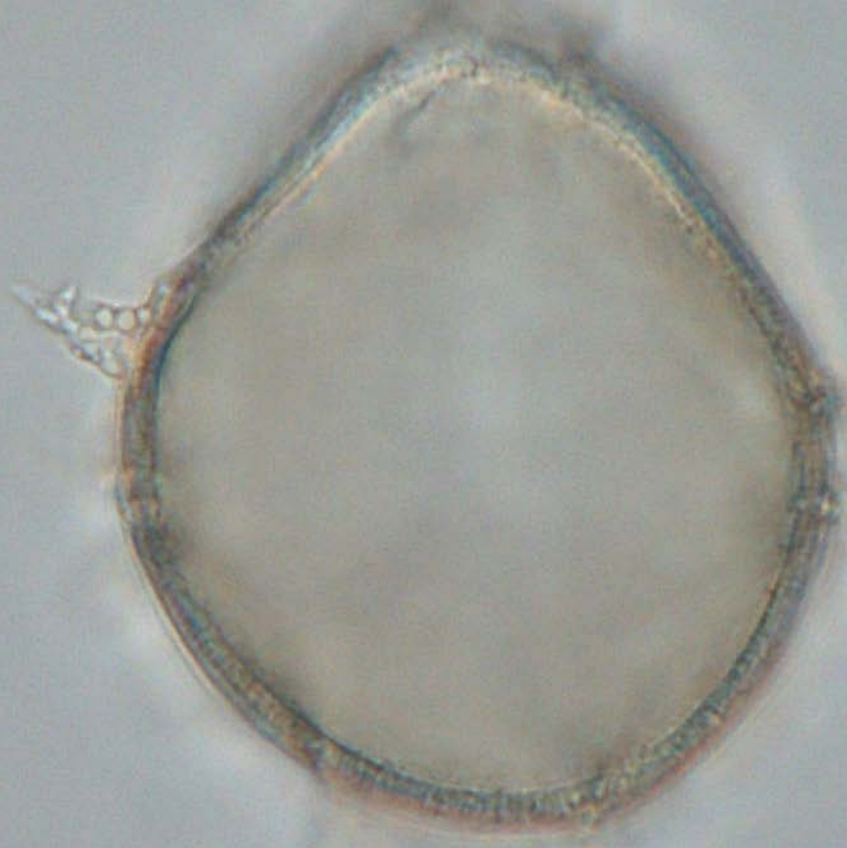

20  $\mu\text{m}$

*Spiniferites multisphaerus* Price & Pospelova 2014  
holotype

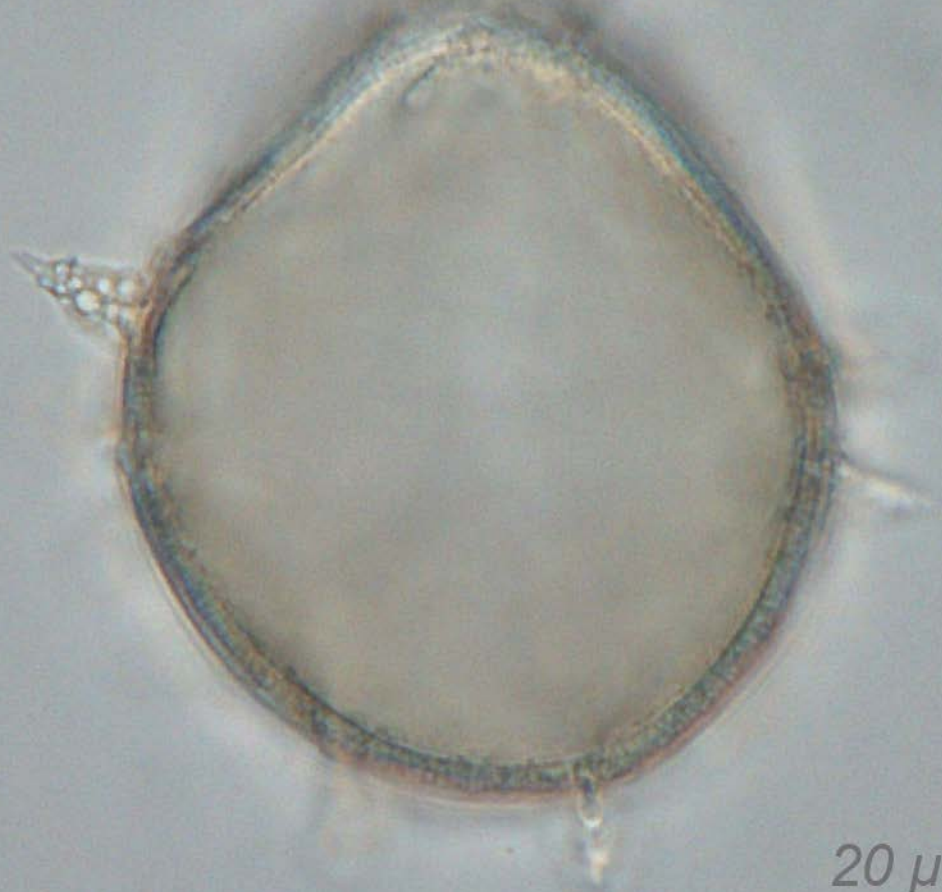

20  $\mu\text{m}$

*Spiniferites multisphaerus* Price & Pospelova 2014  
holotype



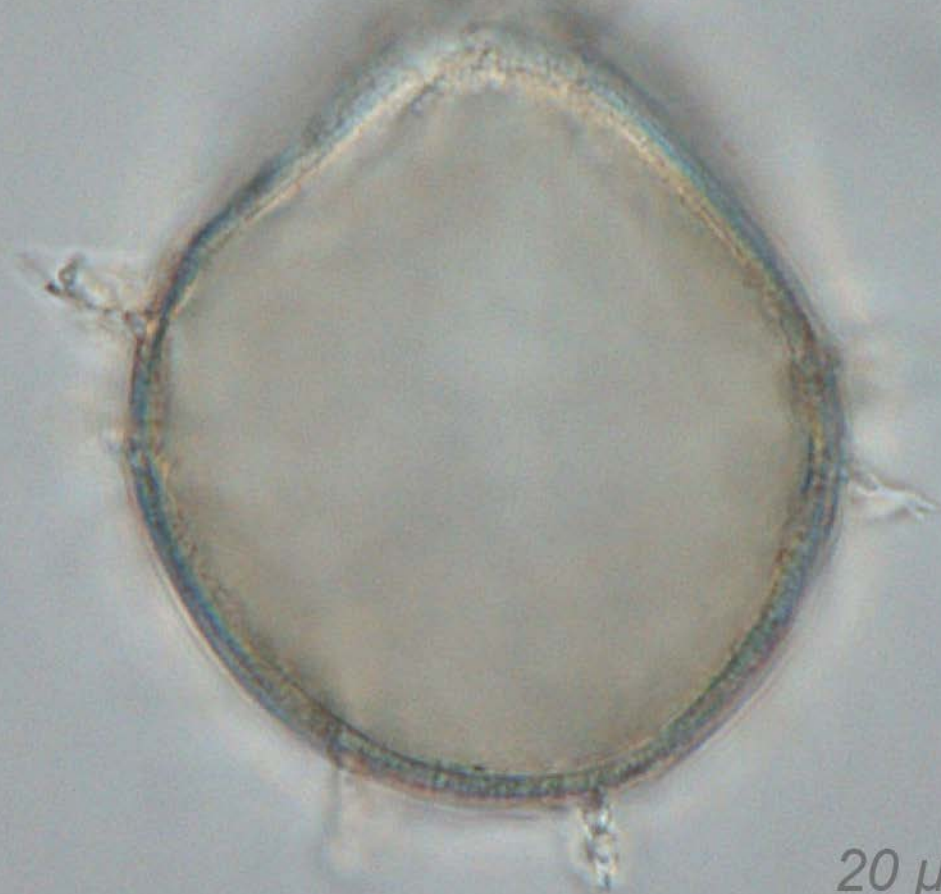

20  $\mu\text{m}$

*Spiniferites multisphaerus* Price & Pospelova 2014  
holotype

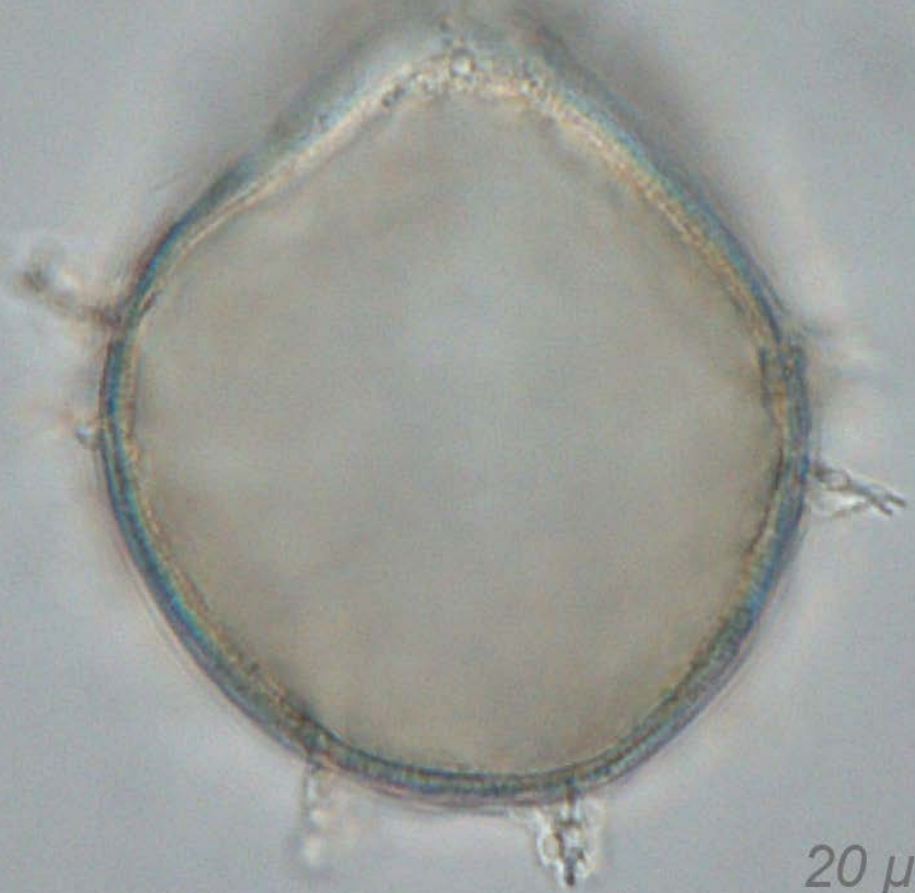

20  $\mu\text{m}$

*Spiniferites multisphaerus* Price & Pospelova 2014  
holotype

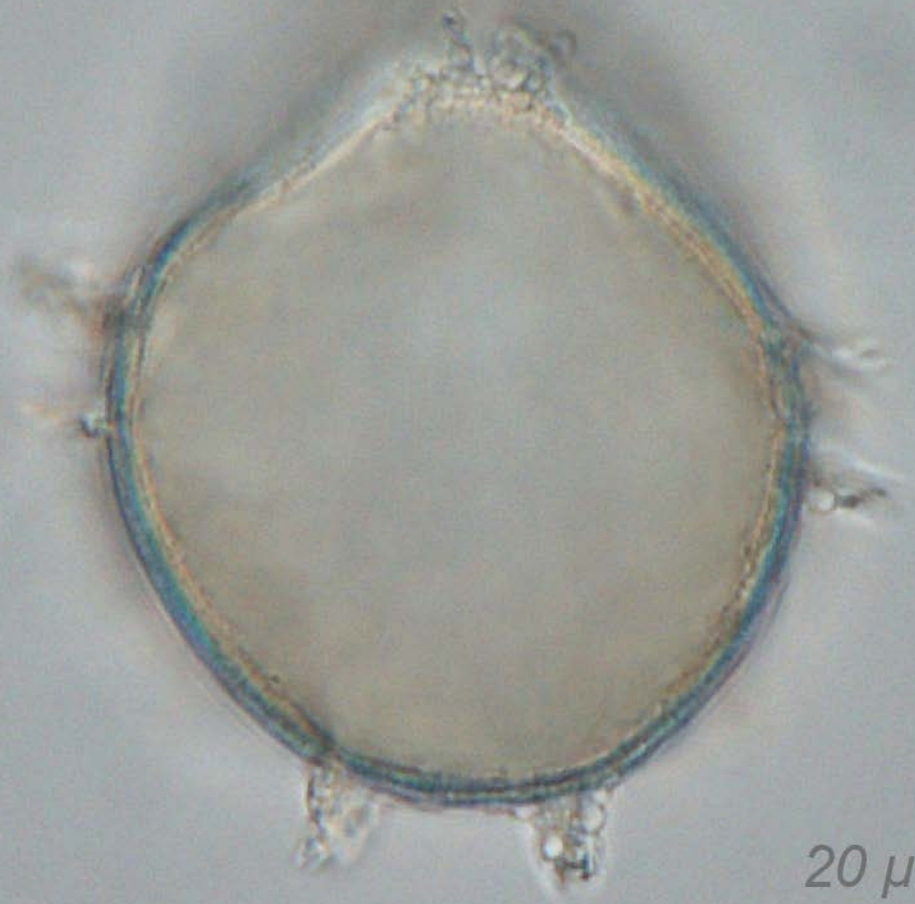

20  $\mu\text{m}$

*Spiniferites multisphaerus* Price & Pospelova 2014  
holotype



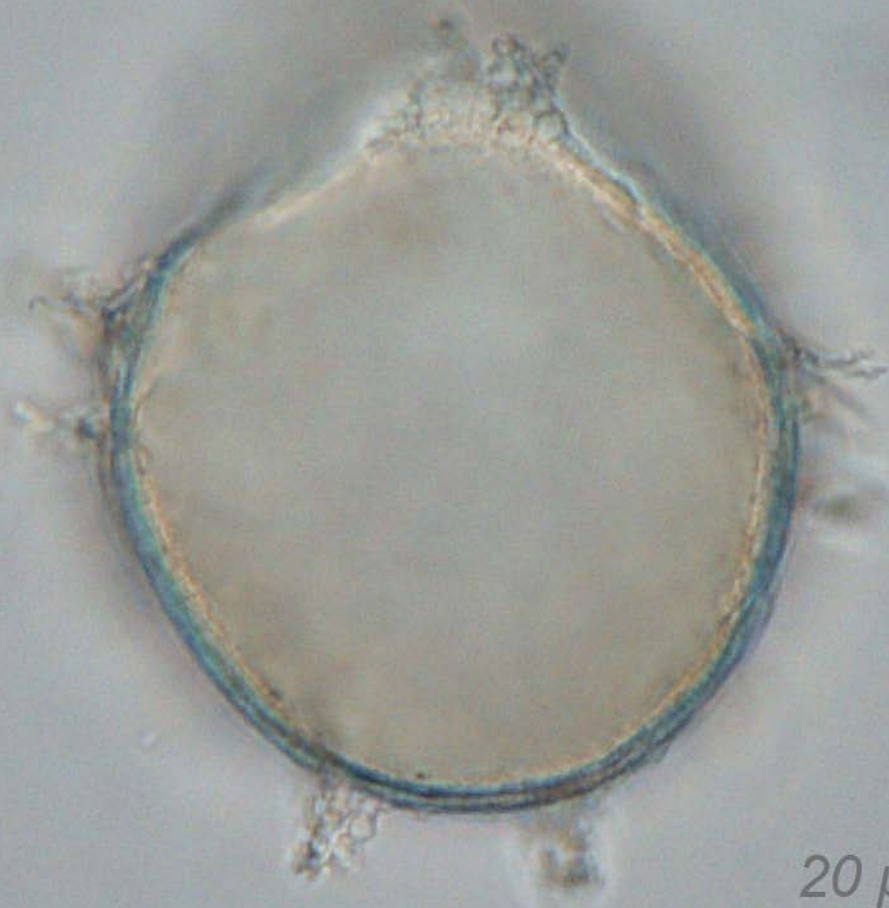

20  $\mu\text{m}$

*Spiniferites multisphaerus* Price & Pospelova 2014  
holotype

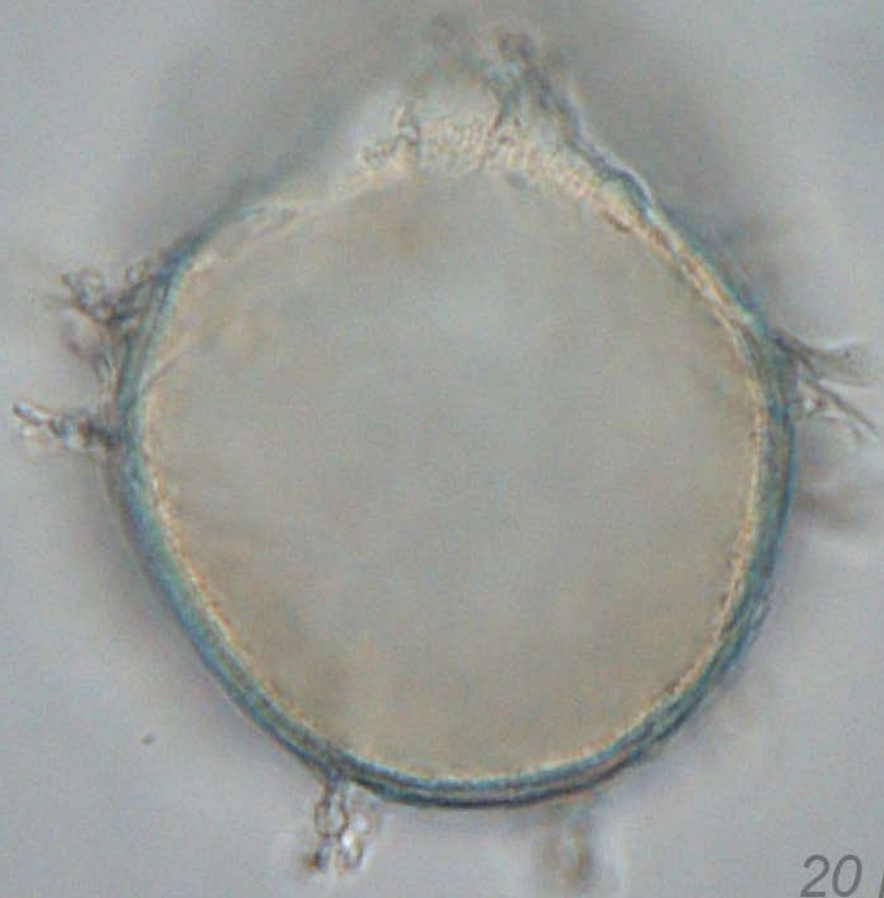

20  $\mu\text{m}$

---

*Spiniferites multisphaerus* Price & Pospelova 2014  
holotype

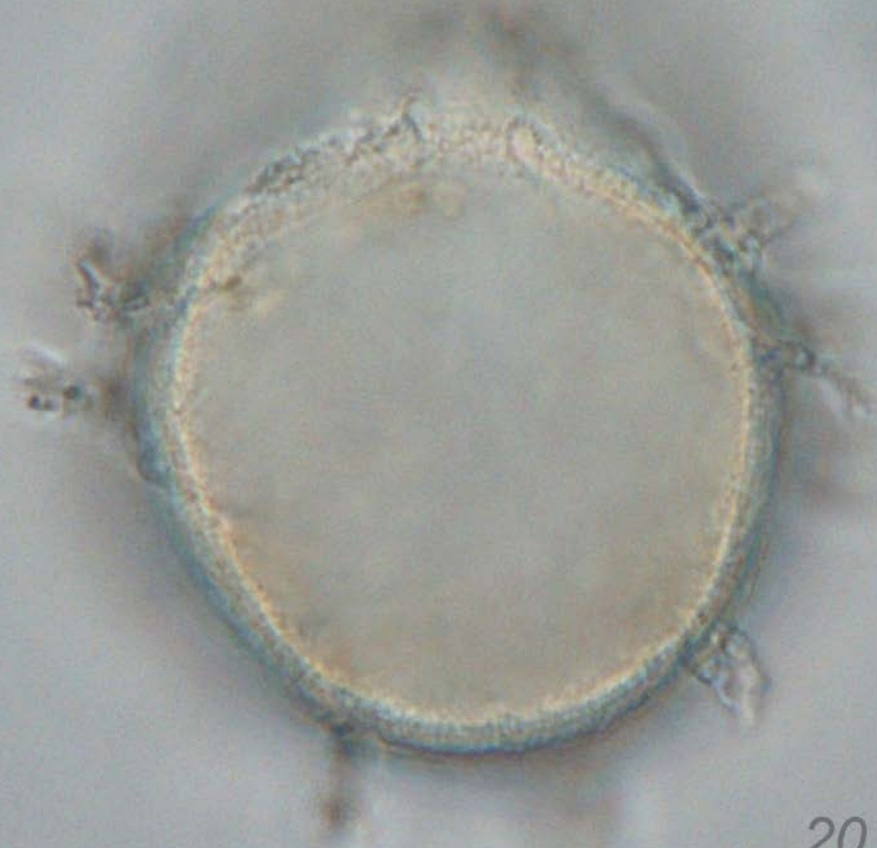

20  $\mu\text{m}$

---

*Spiniferites multisphaerus* Price & Pospelova 2014  
holotype



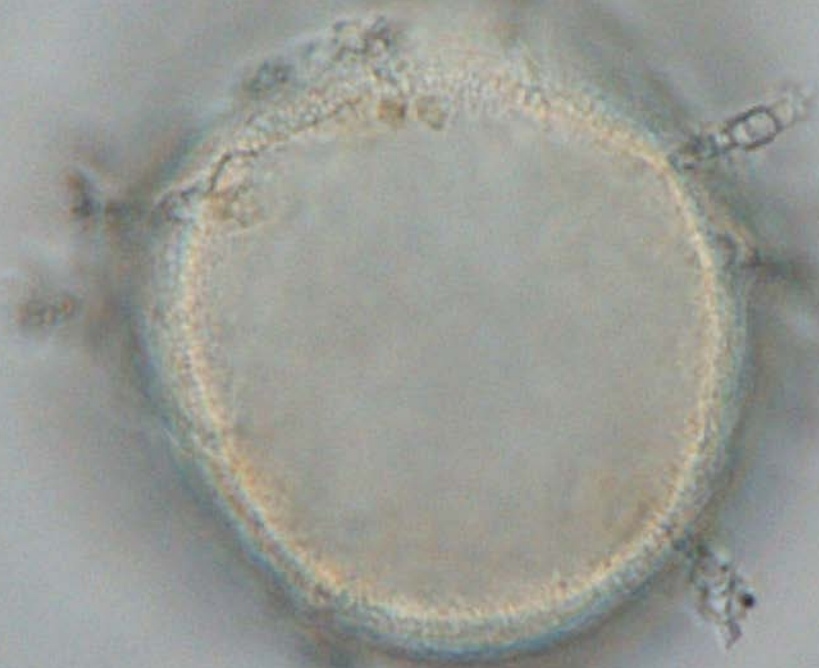

20  $\mu\text{m}$

---

*Spiniferites multisphaerus* Price & Pospelova 2014  
holotype

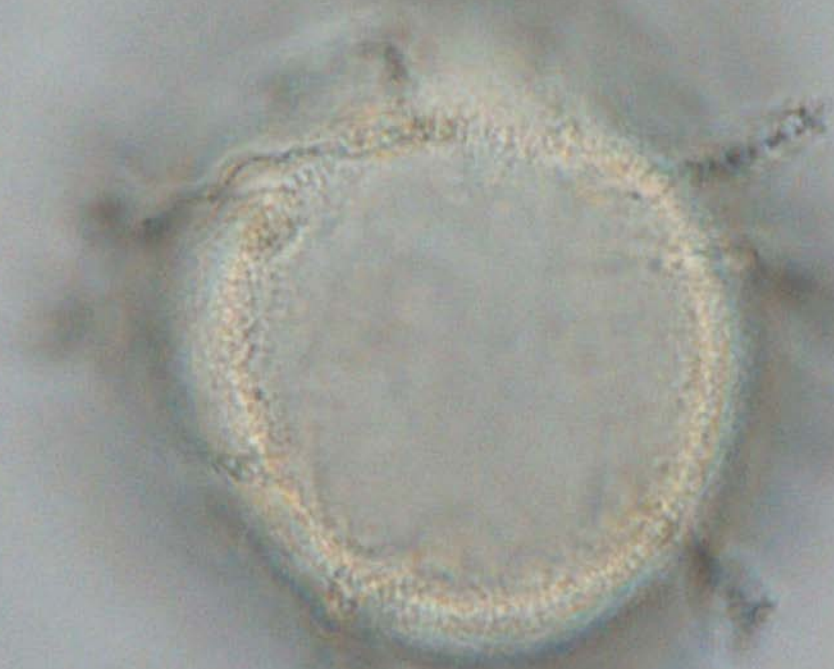

20  $\mu\text{m}$

---

*Spiniferites multisphaerus* Price & Pospelova 2014  
holotype

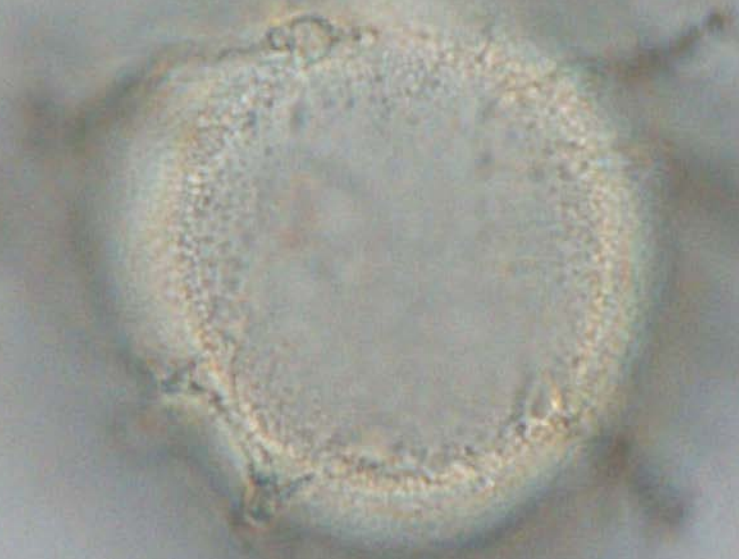

20  $\mu\text{m}$

*Spiniferites multisphaerus* Price & Pospelova 2014  
holotype



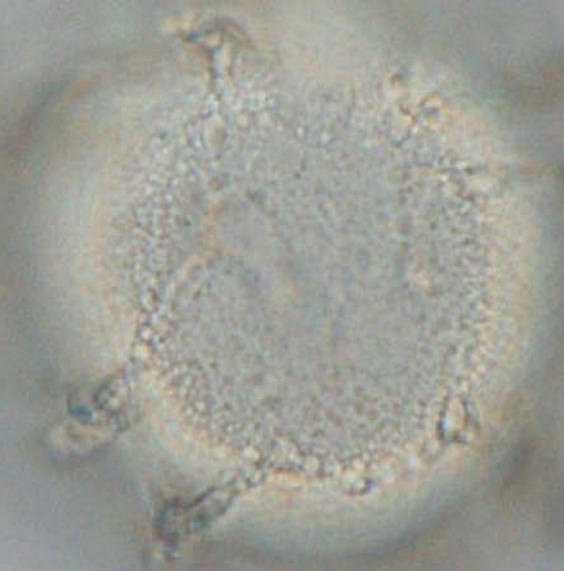

20  $\mu\text{m}$

*Spiniferites multisphaerus* Price & Pospelova 2014  
holotype

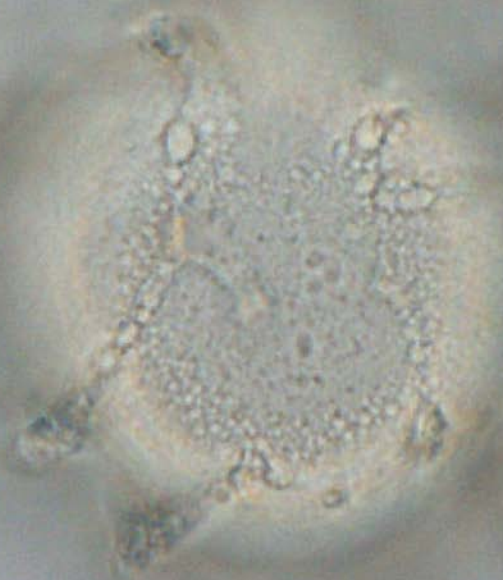

20  $\mu\text{m}$

*Spiniferites multisphaerus* Price & Pospelova 2014  
holotype

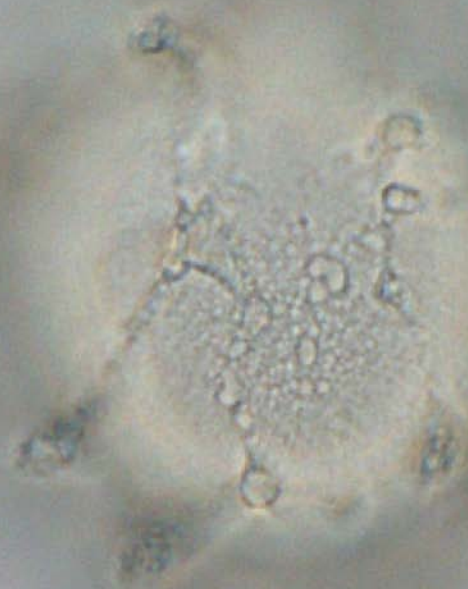

20  $\mu\text{m}$

---

*Spiniferites multisphaerus* Price & Pospelova 2014  
holotype



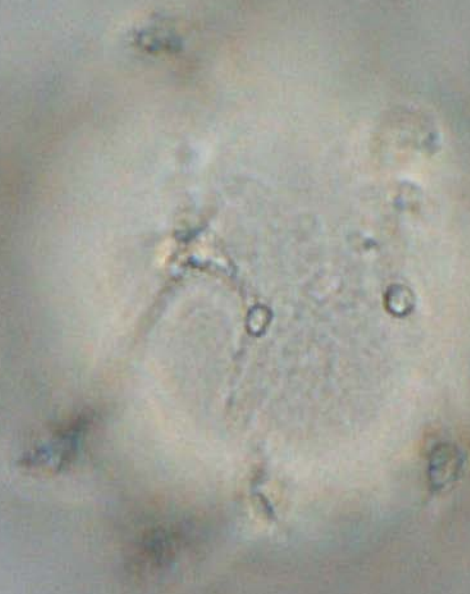

20  $\mu\text{m}$

---

*Spiniferites multisphaerus* Price & Pospelova 2014  
holotype

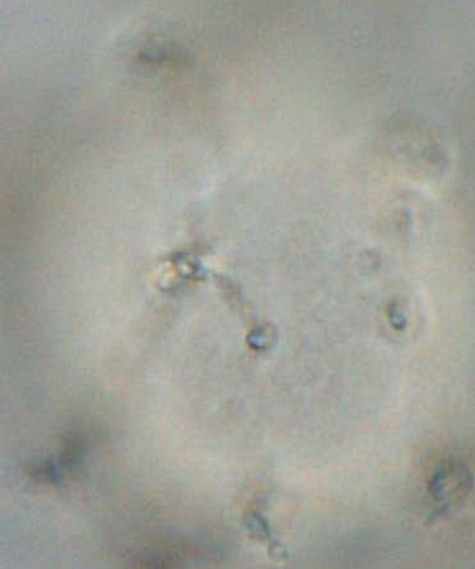

20  $\mu\text{m}$

*Spiniferites multisphaerus* Price & Pospelova 2014  
holotype

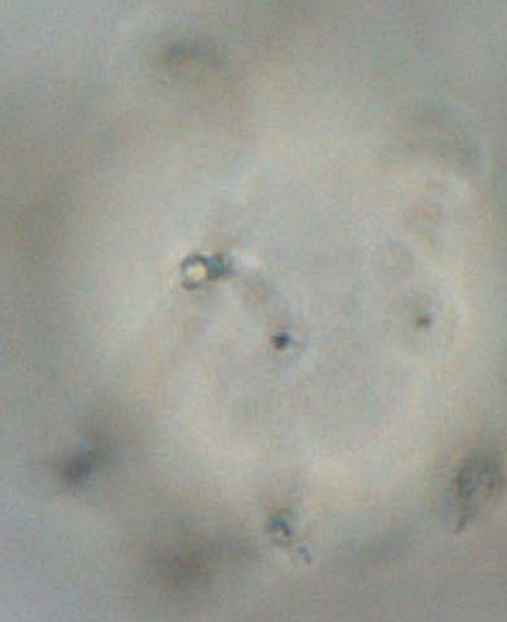

20  $\mu\text{m}$

*Spiniferites multisphaerus* Price & Pospelova 2014  
holotype
