# Supplementary material
Source: publisher figshare collection journal article supplement (https://tandf.figshare.com/articles/dataset/_/7466618)
Supplement: Supplementary file 11 [file 1]

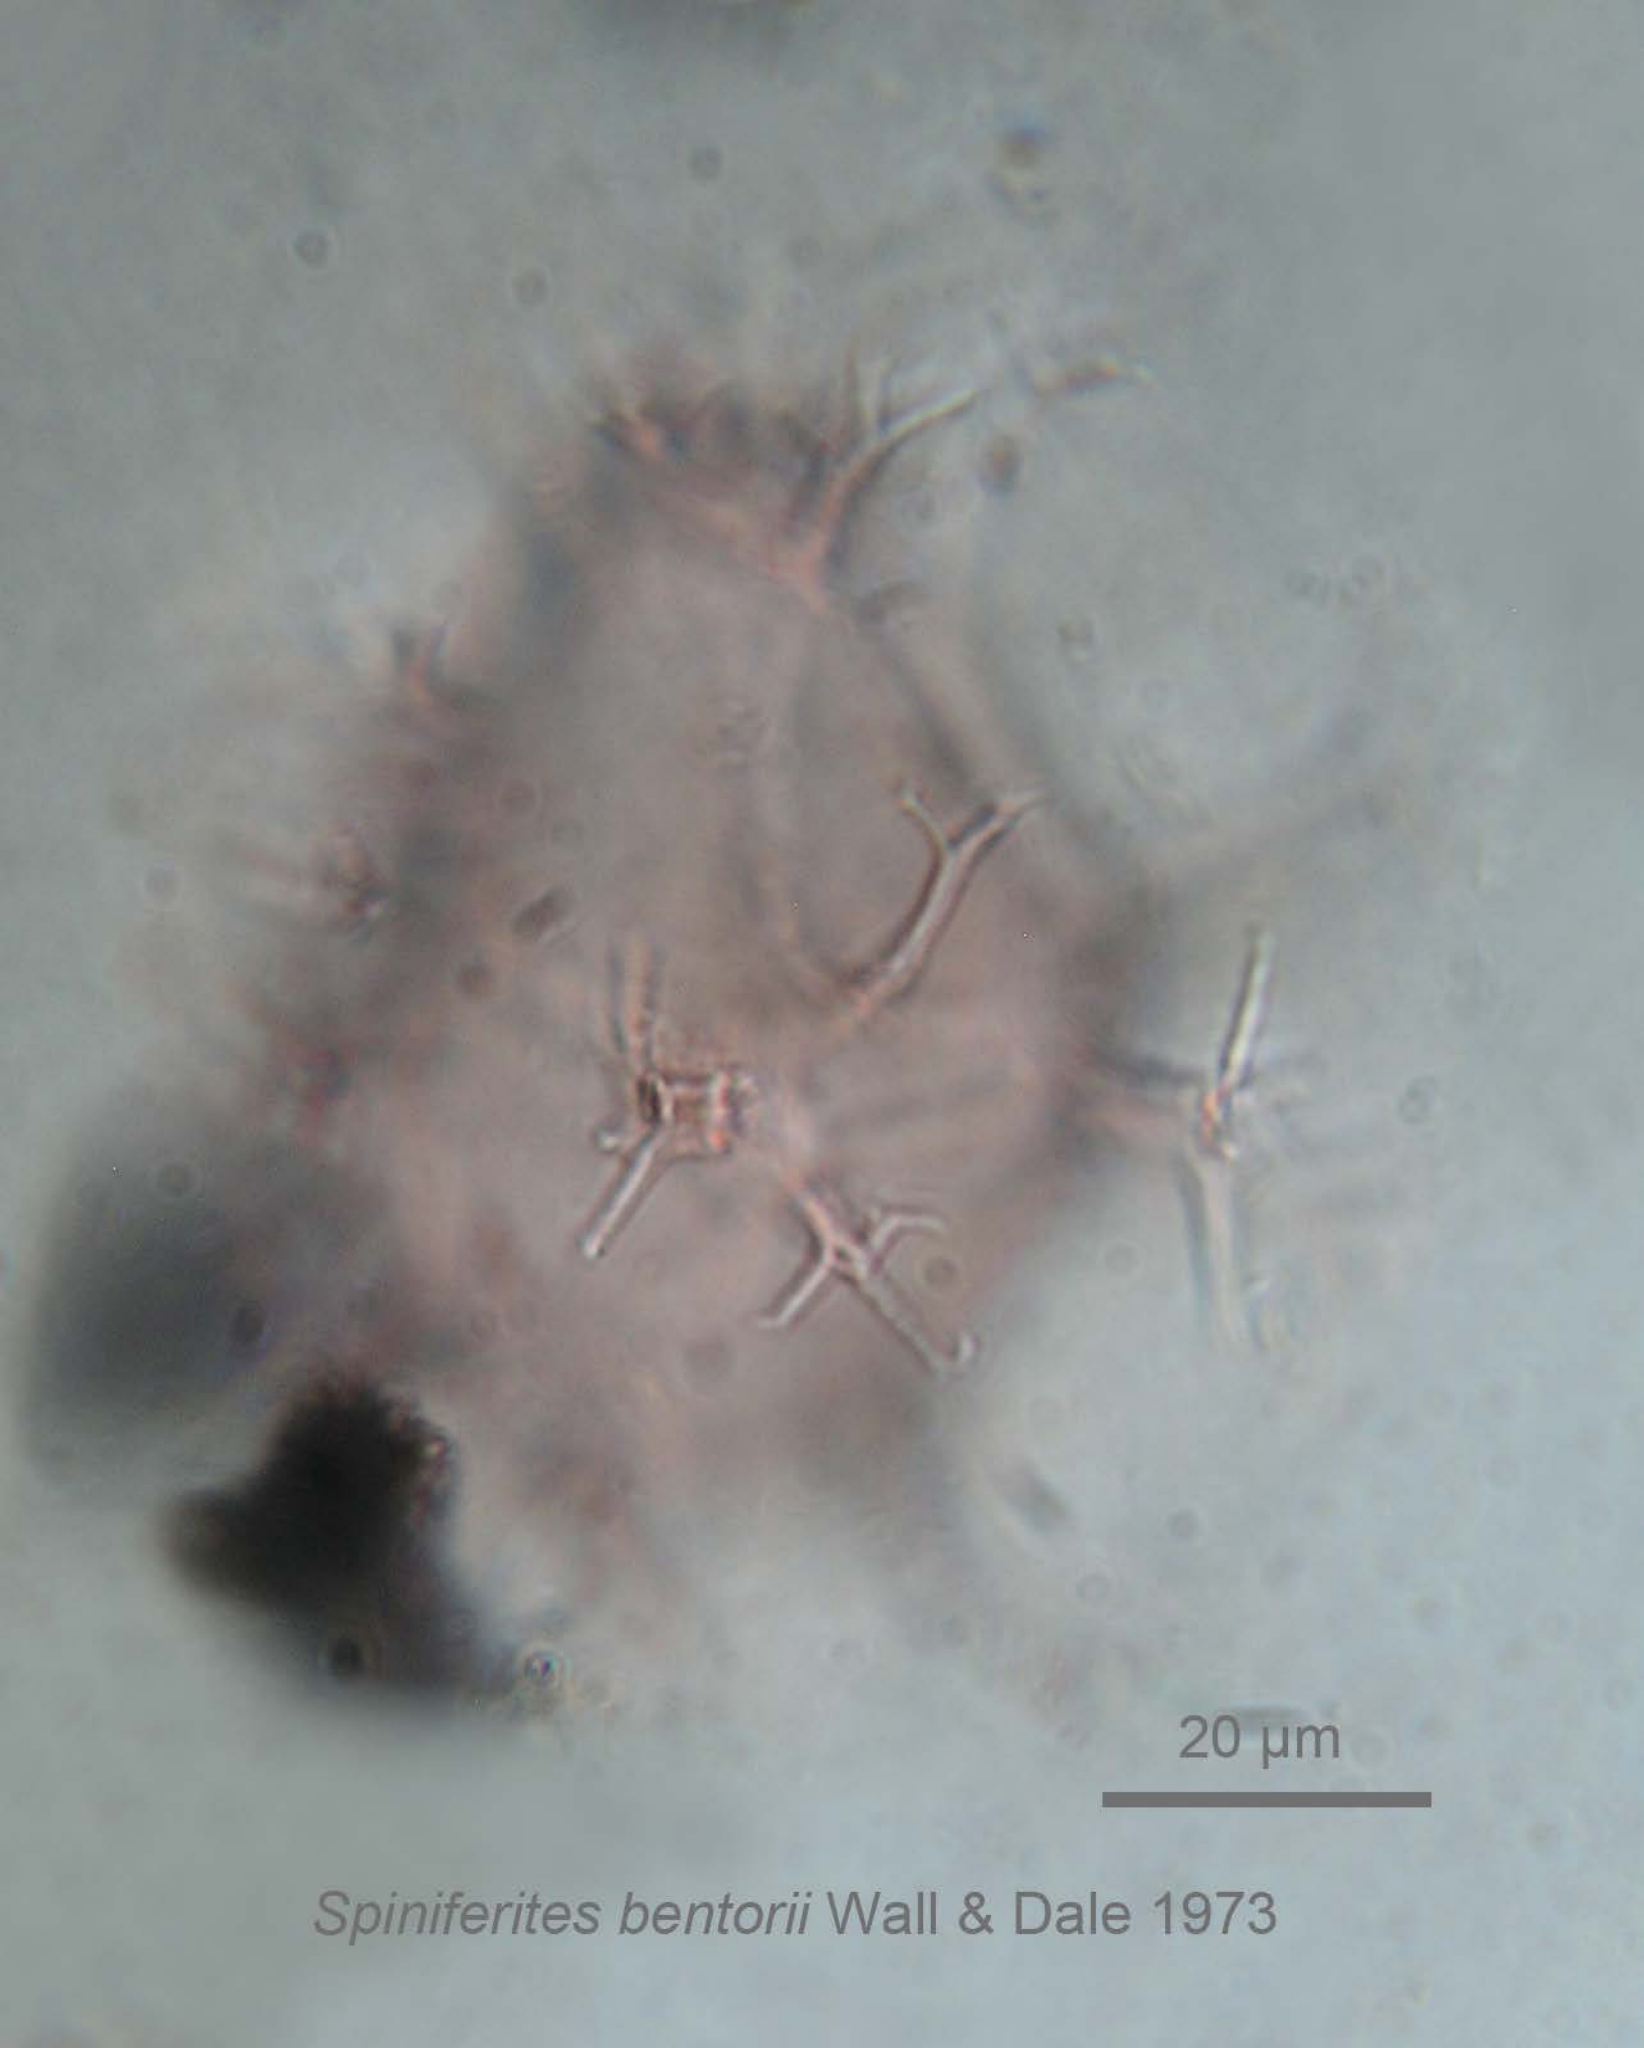

20  $\mu\text{m}$

*Spiniferites bentorii* Wall & Dale 1973

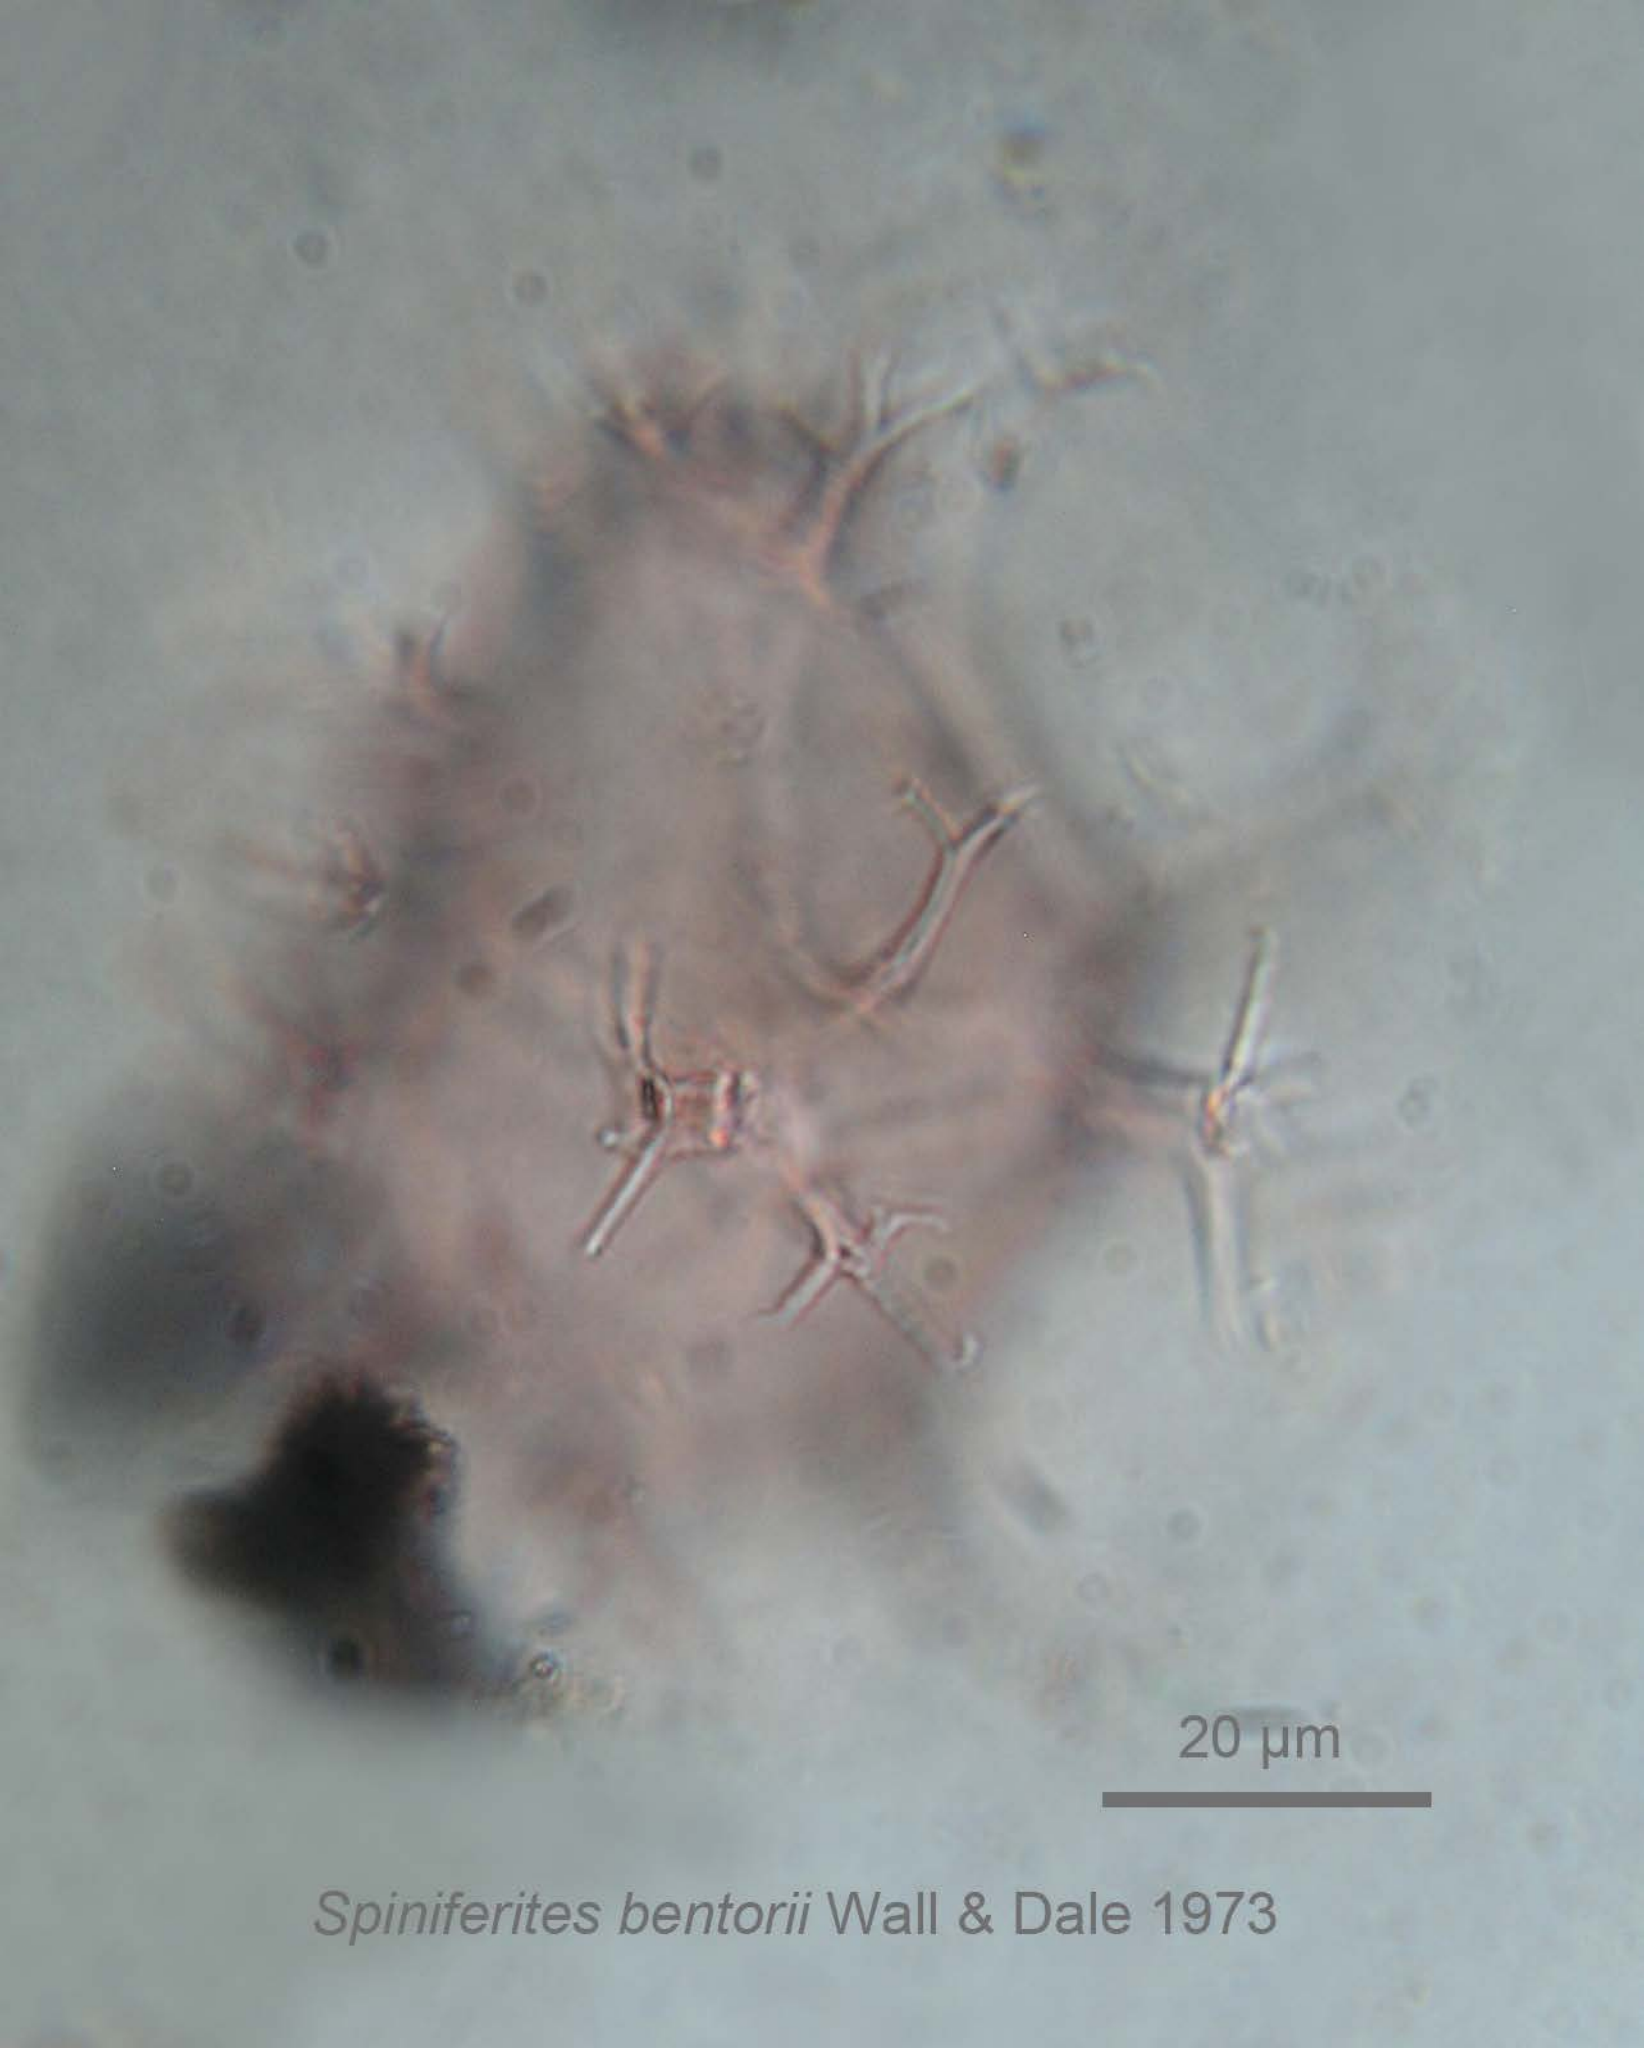

20 μm

*Spiniferites bentorii* Wall & Dale 1973

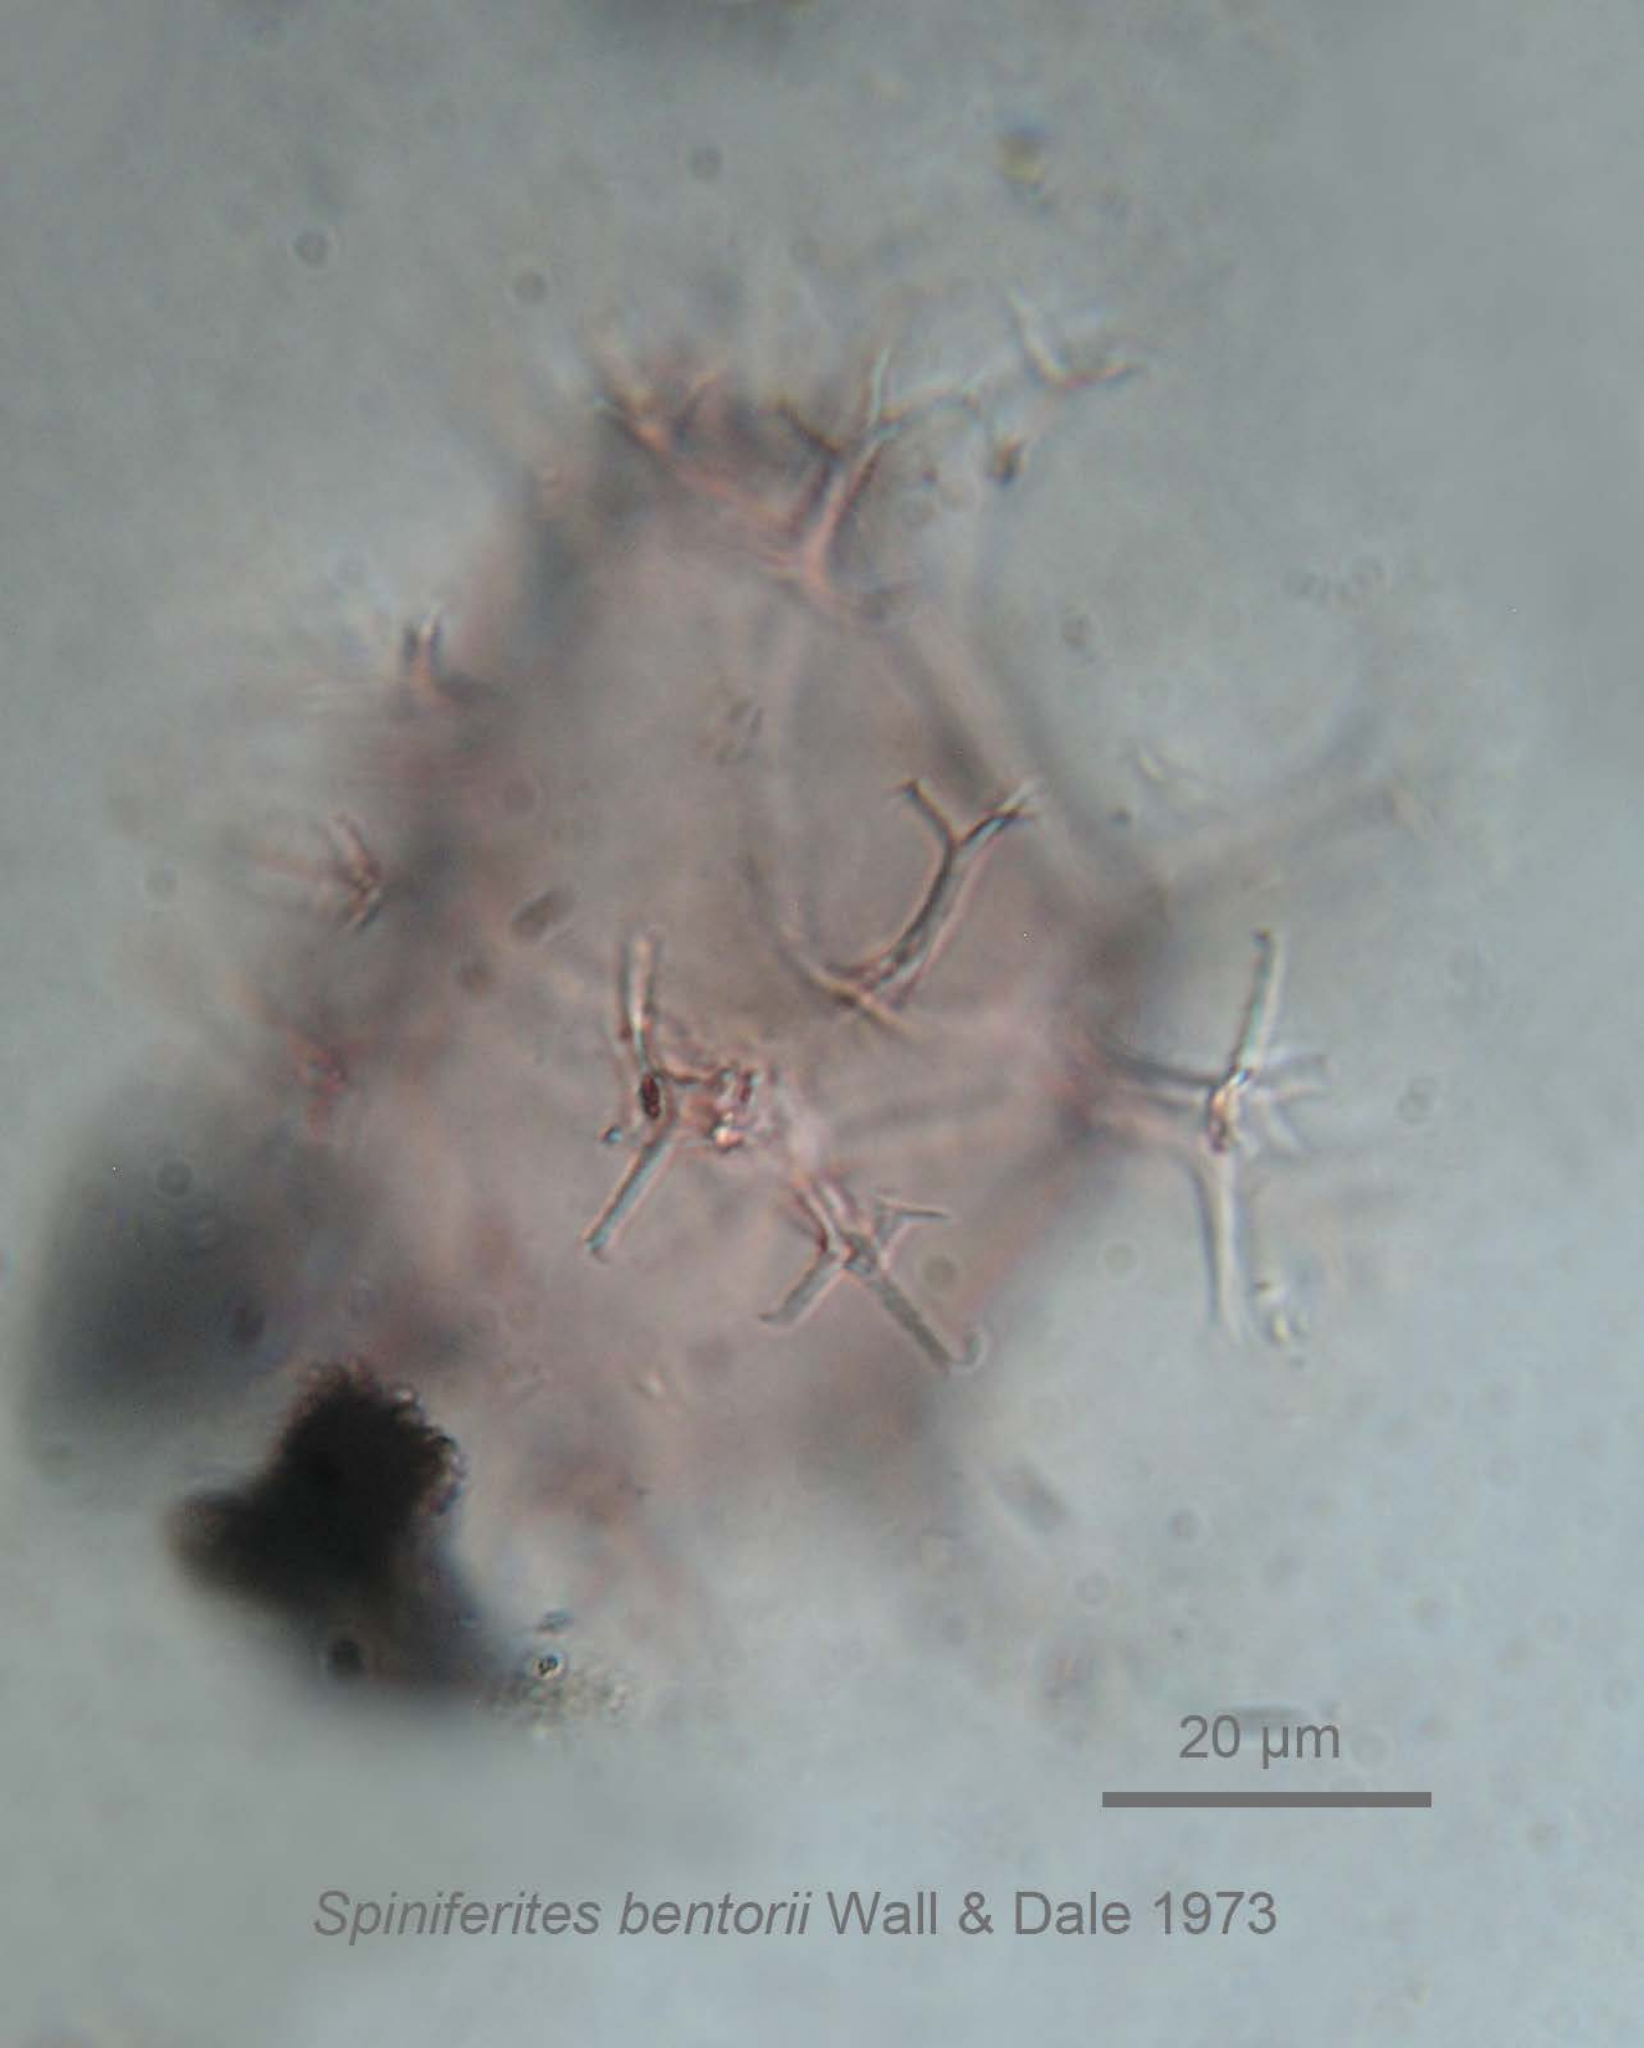

20  $\mu\text{m}$

*Spiniferites bentorii* Wall & Dale 1973



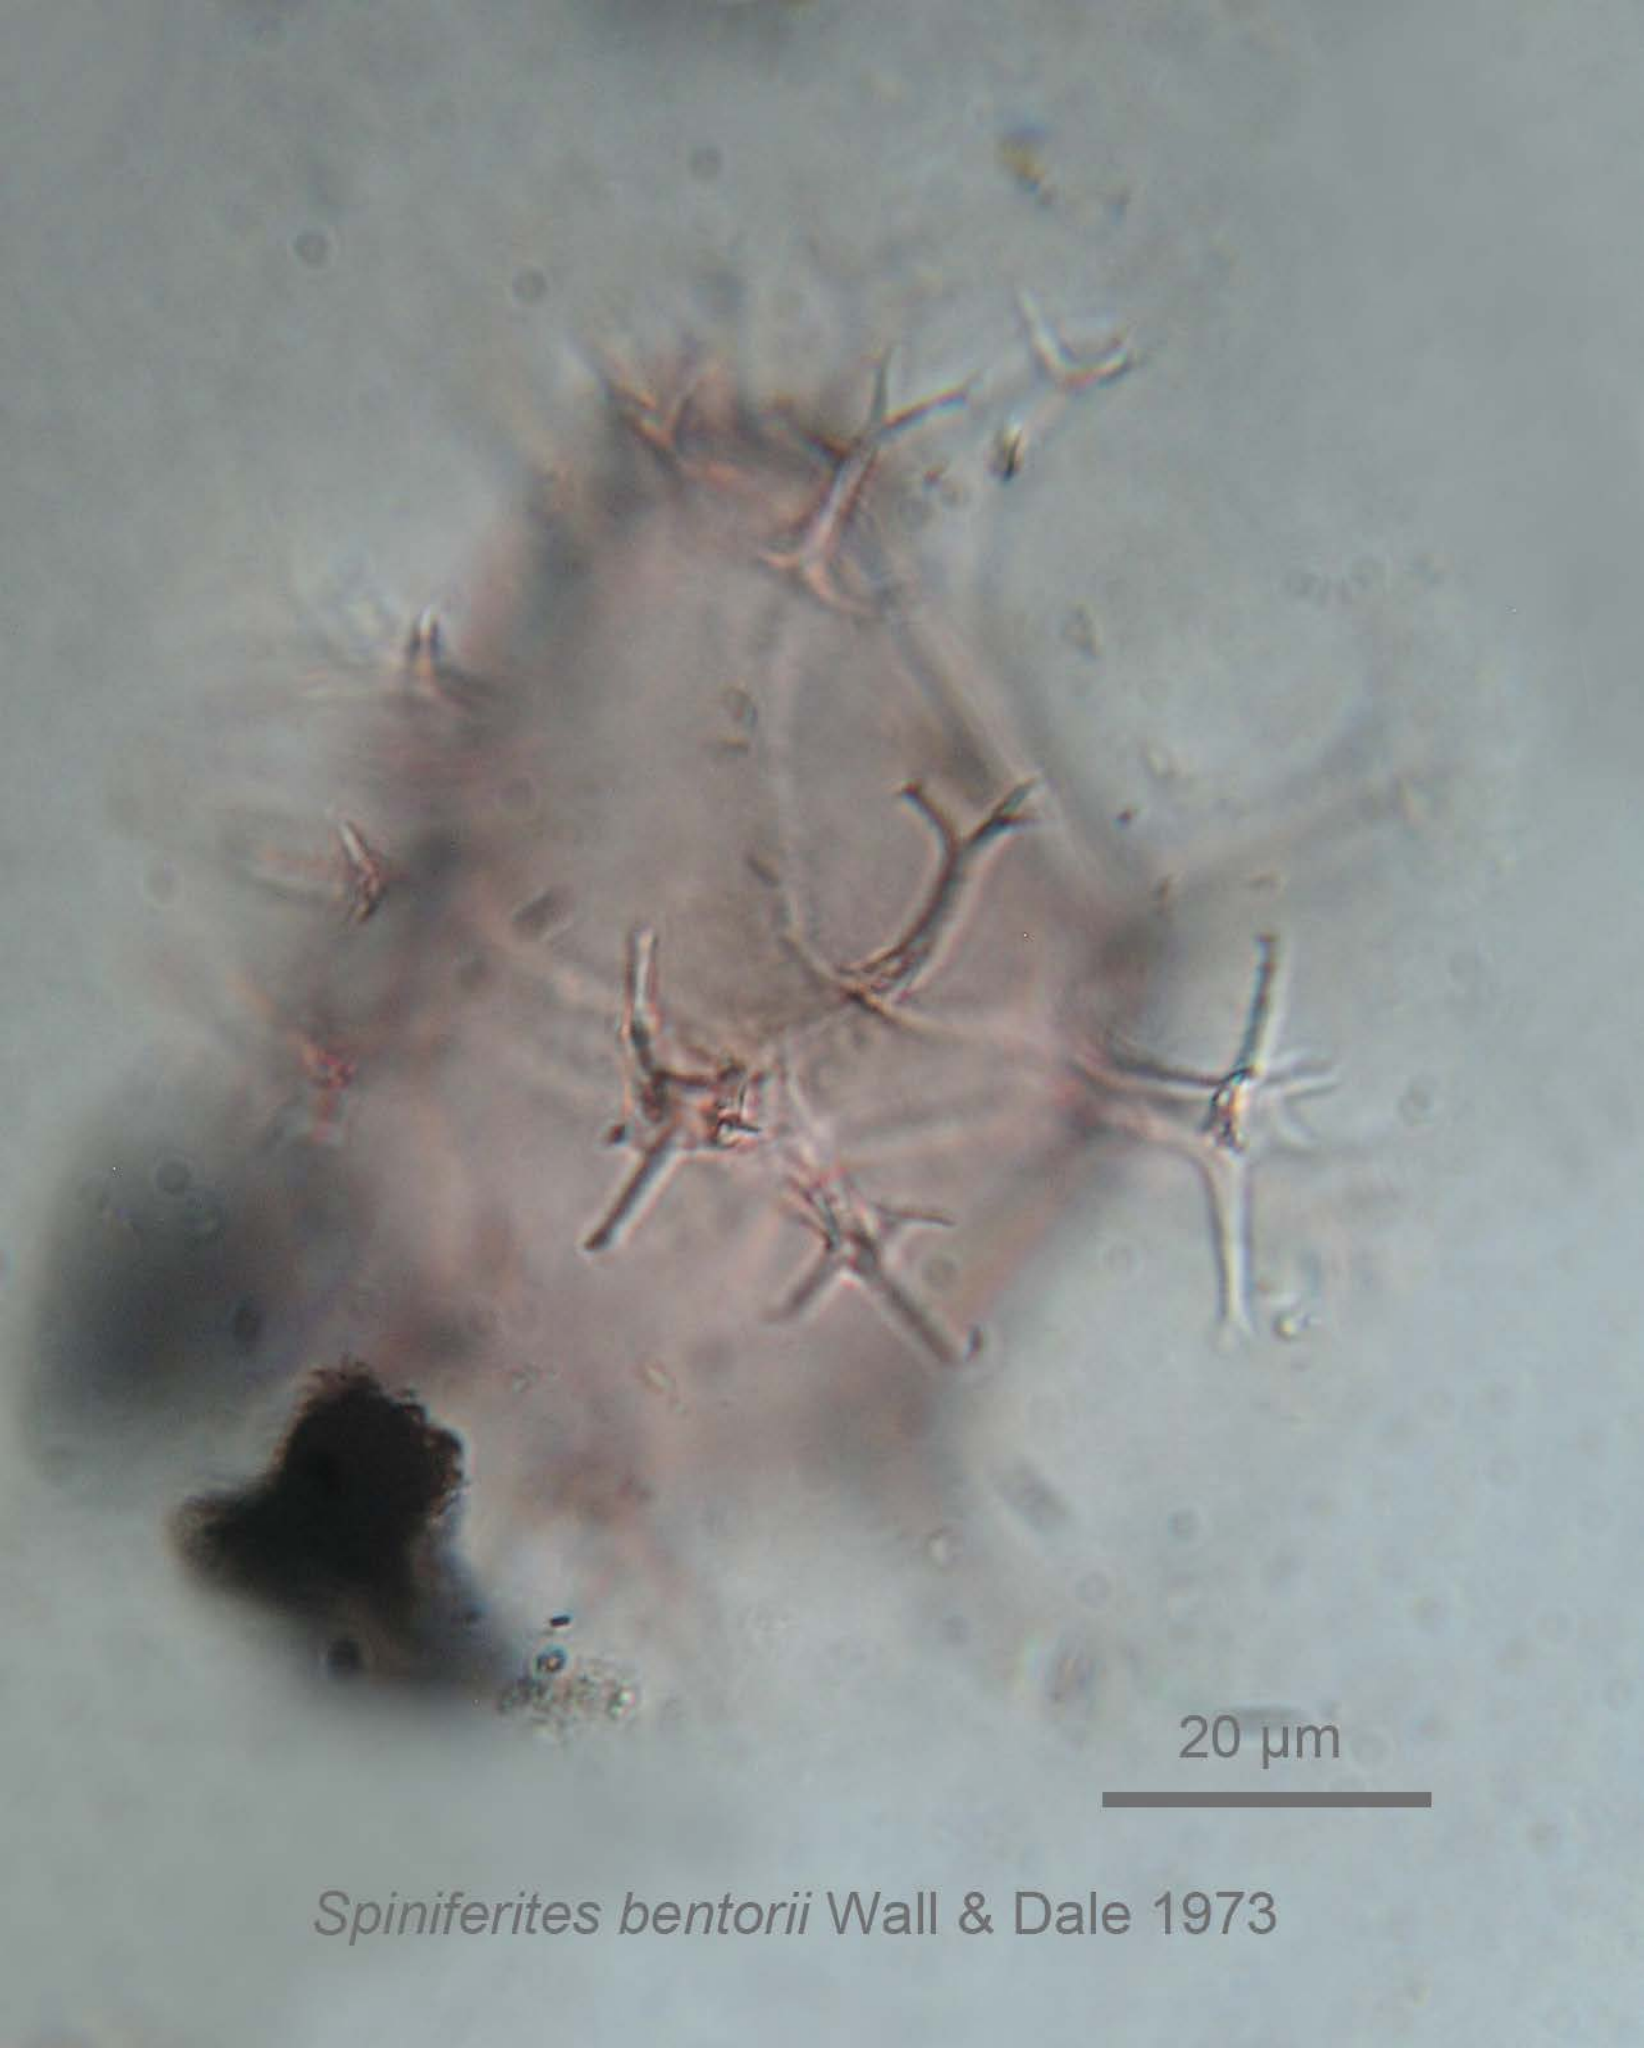

20  $\mu\text{m}$

*Spiniferites bentorii* Wall & Dale 1973

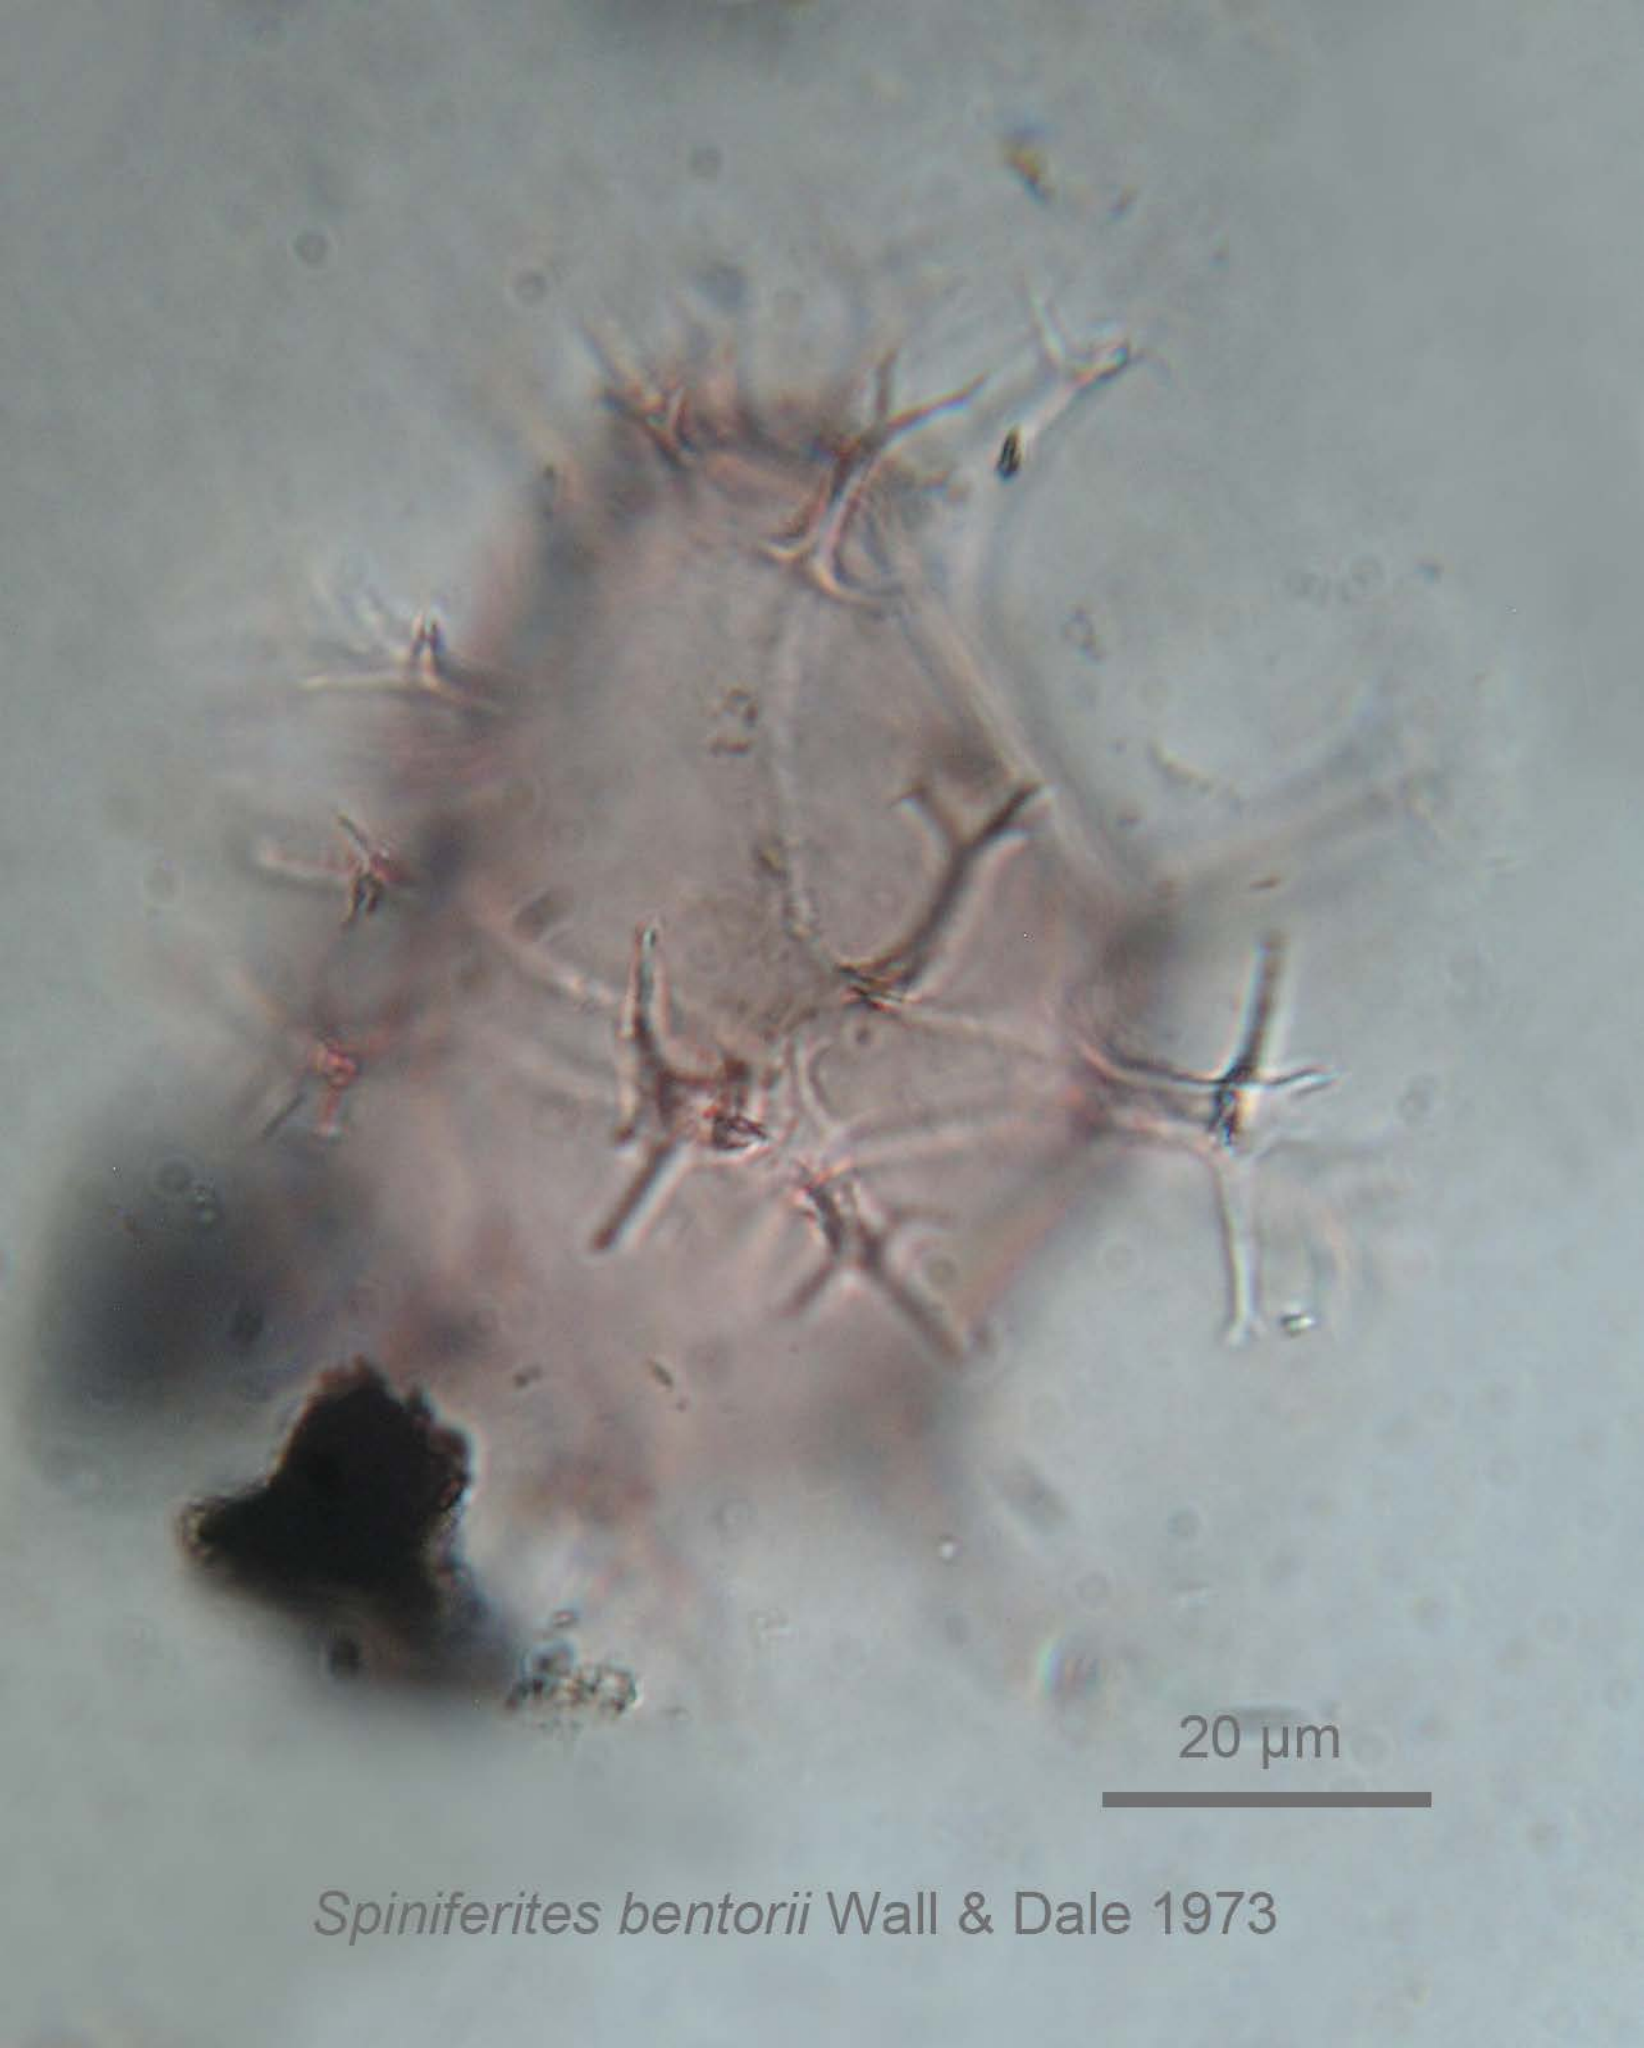

20  $\mu\text{m}$

*Spiniferites bentorii* Wall & Dale 1973

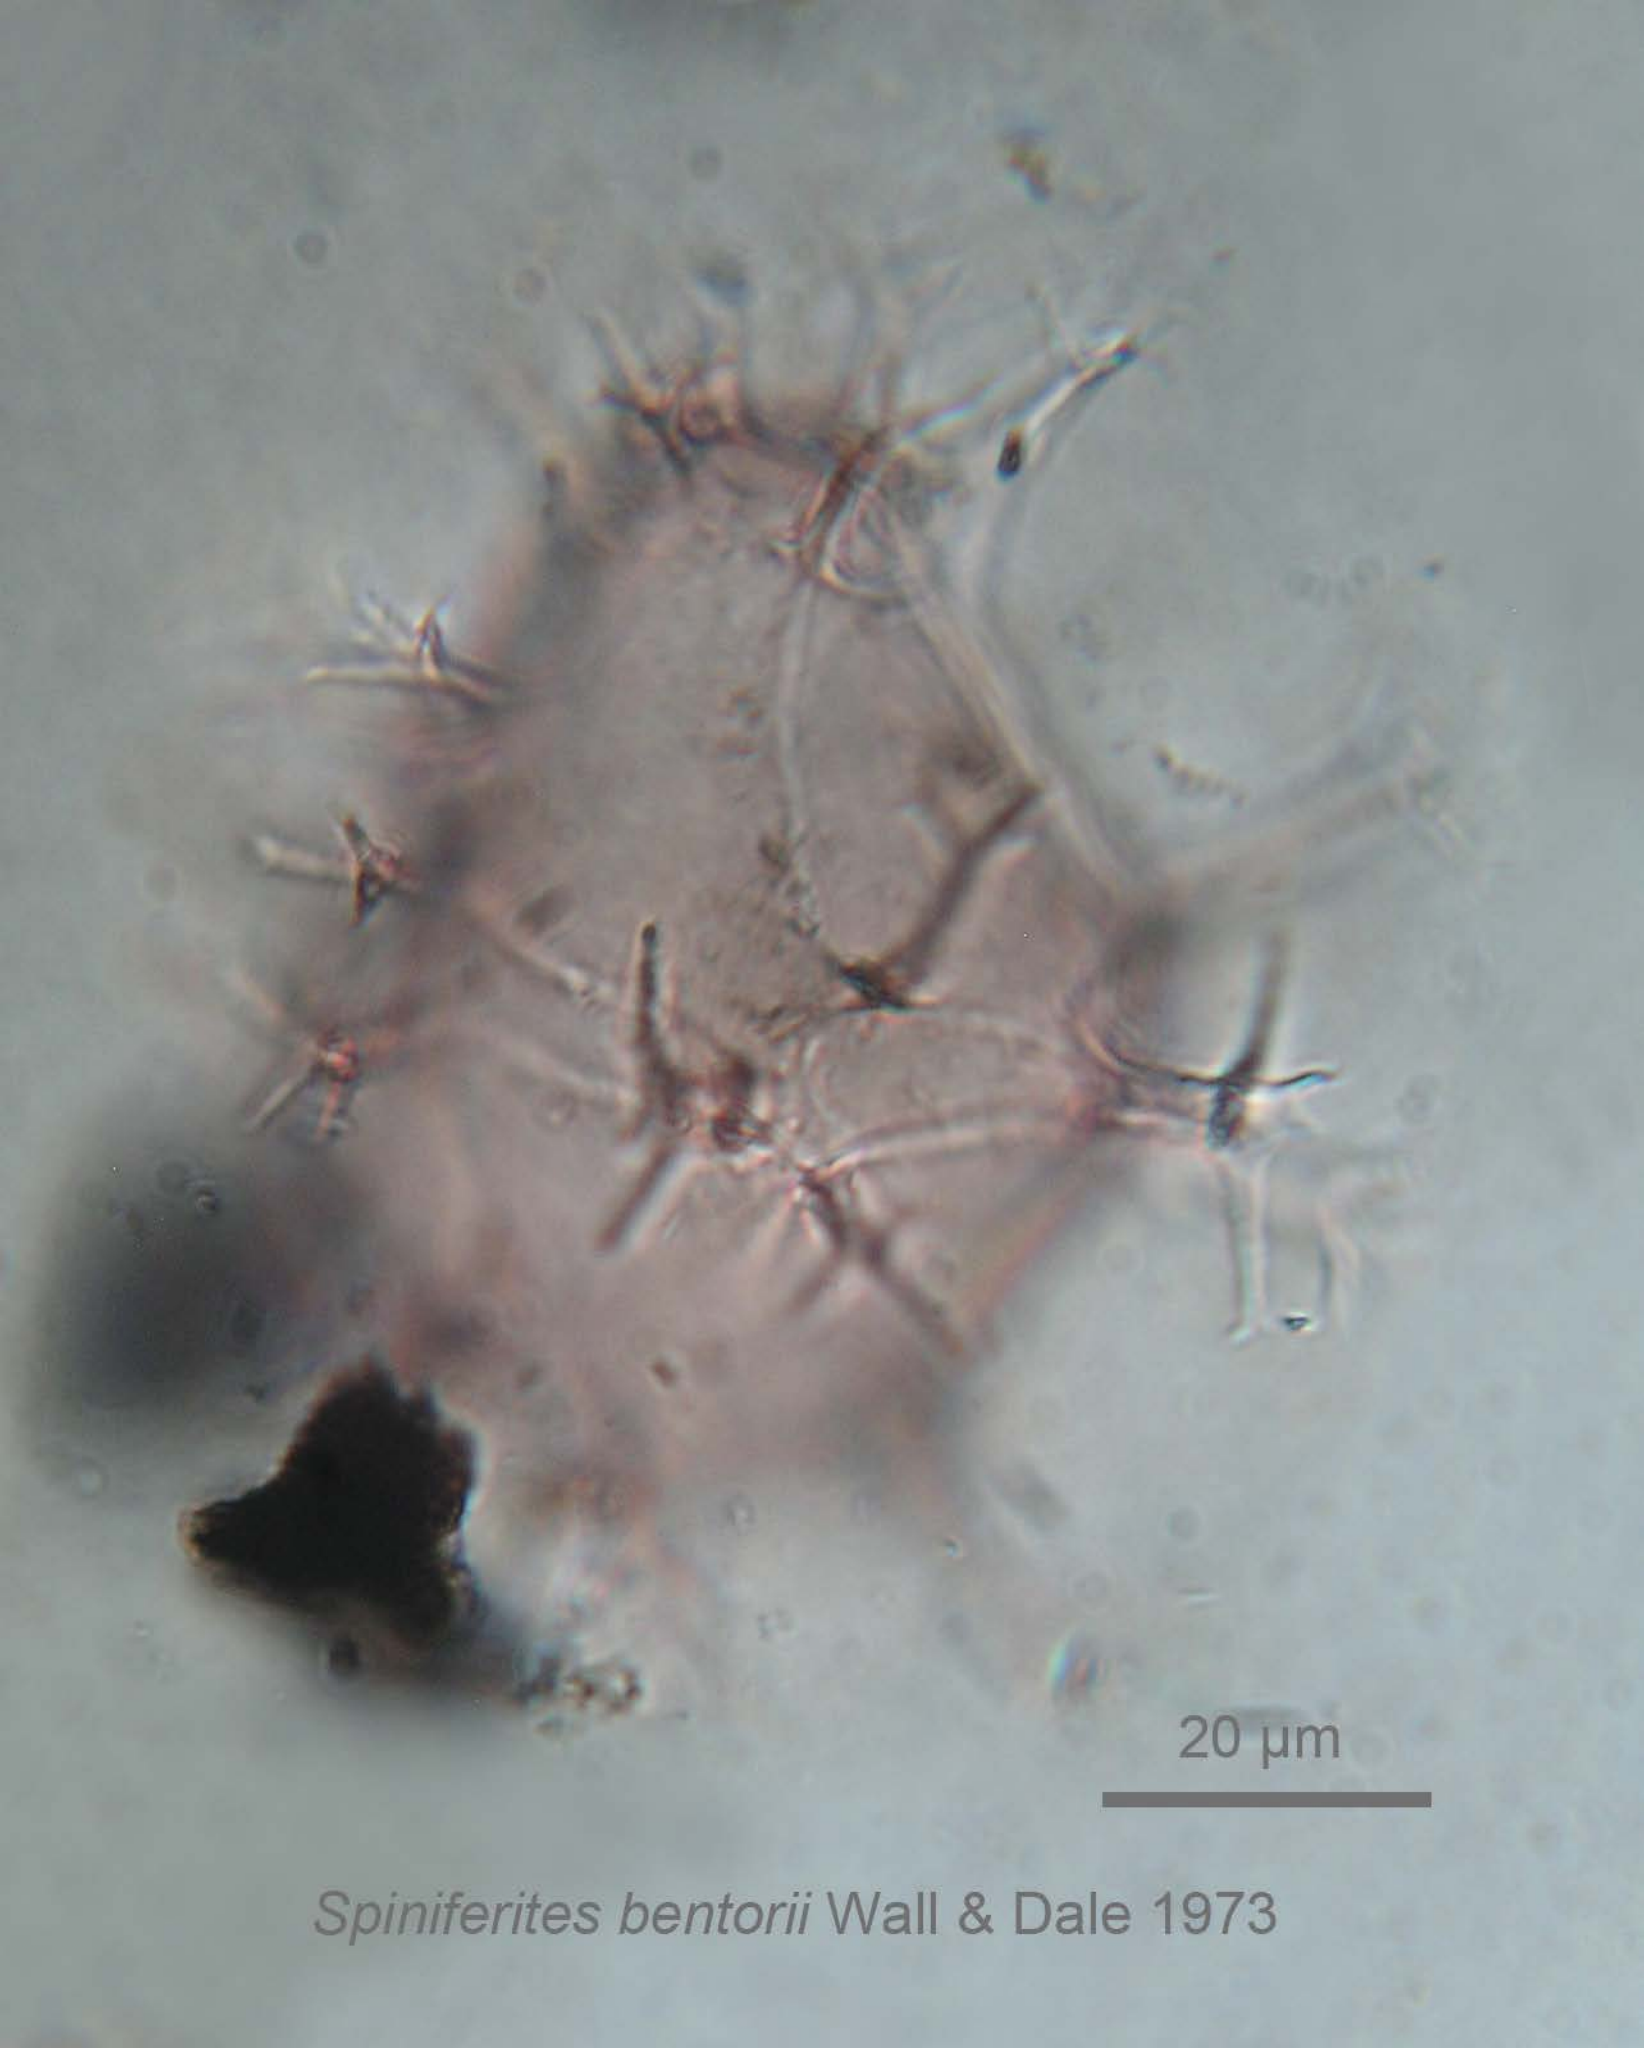

20 µm

*Spiniferites bentorii* Wall & Dale 1973



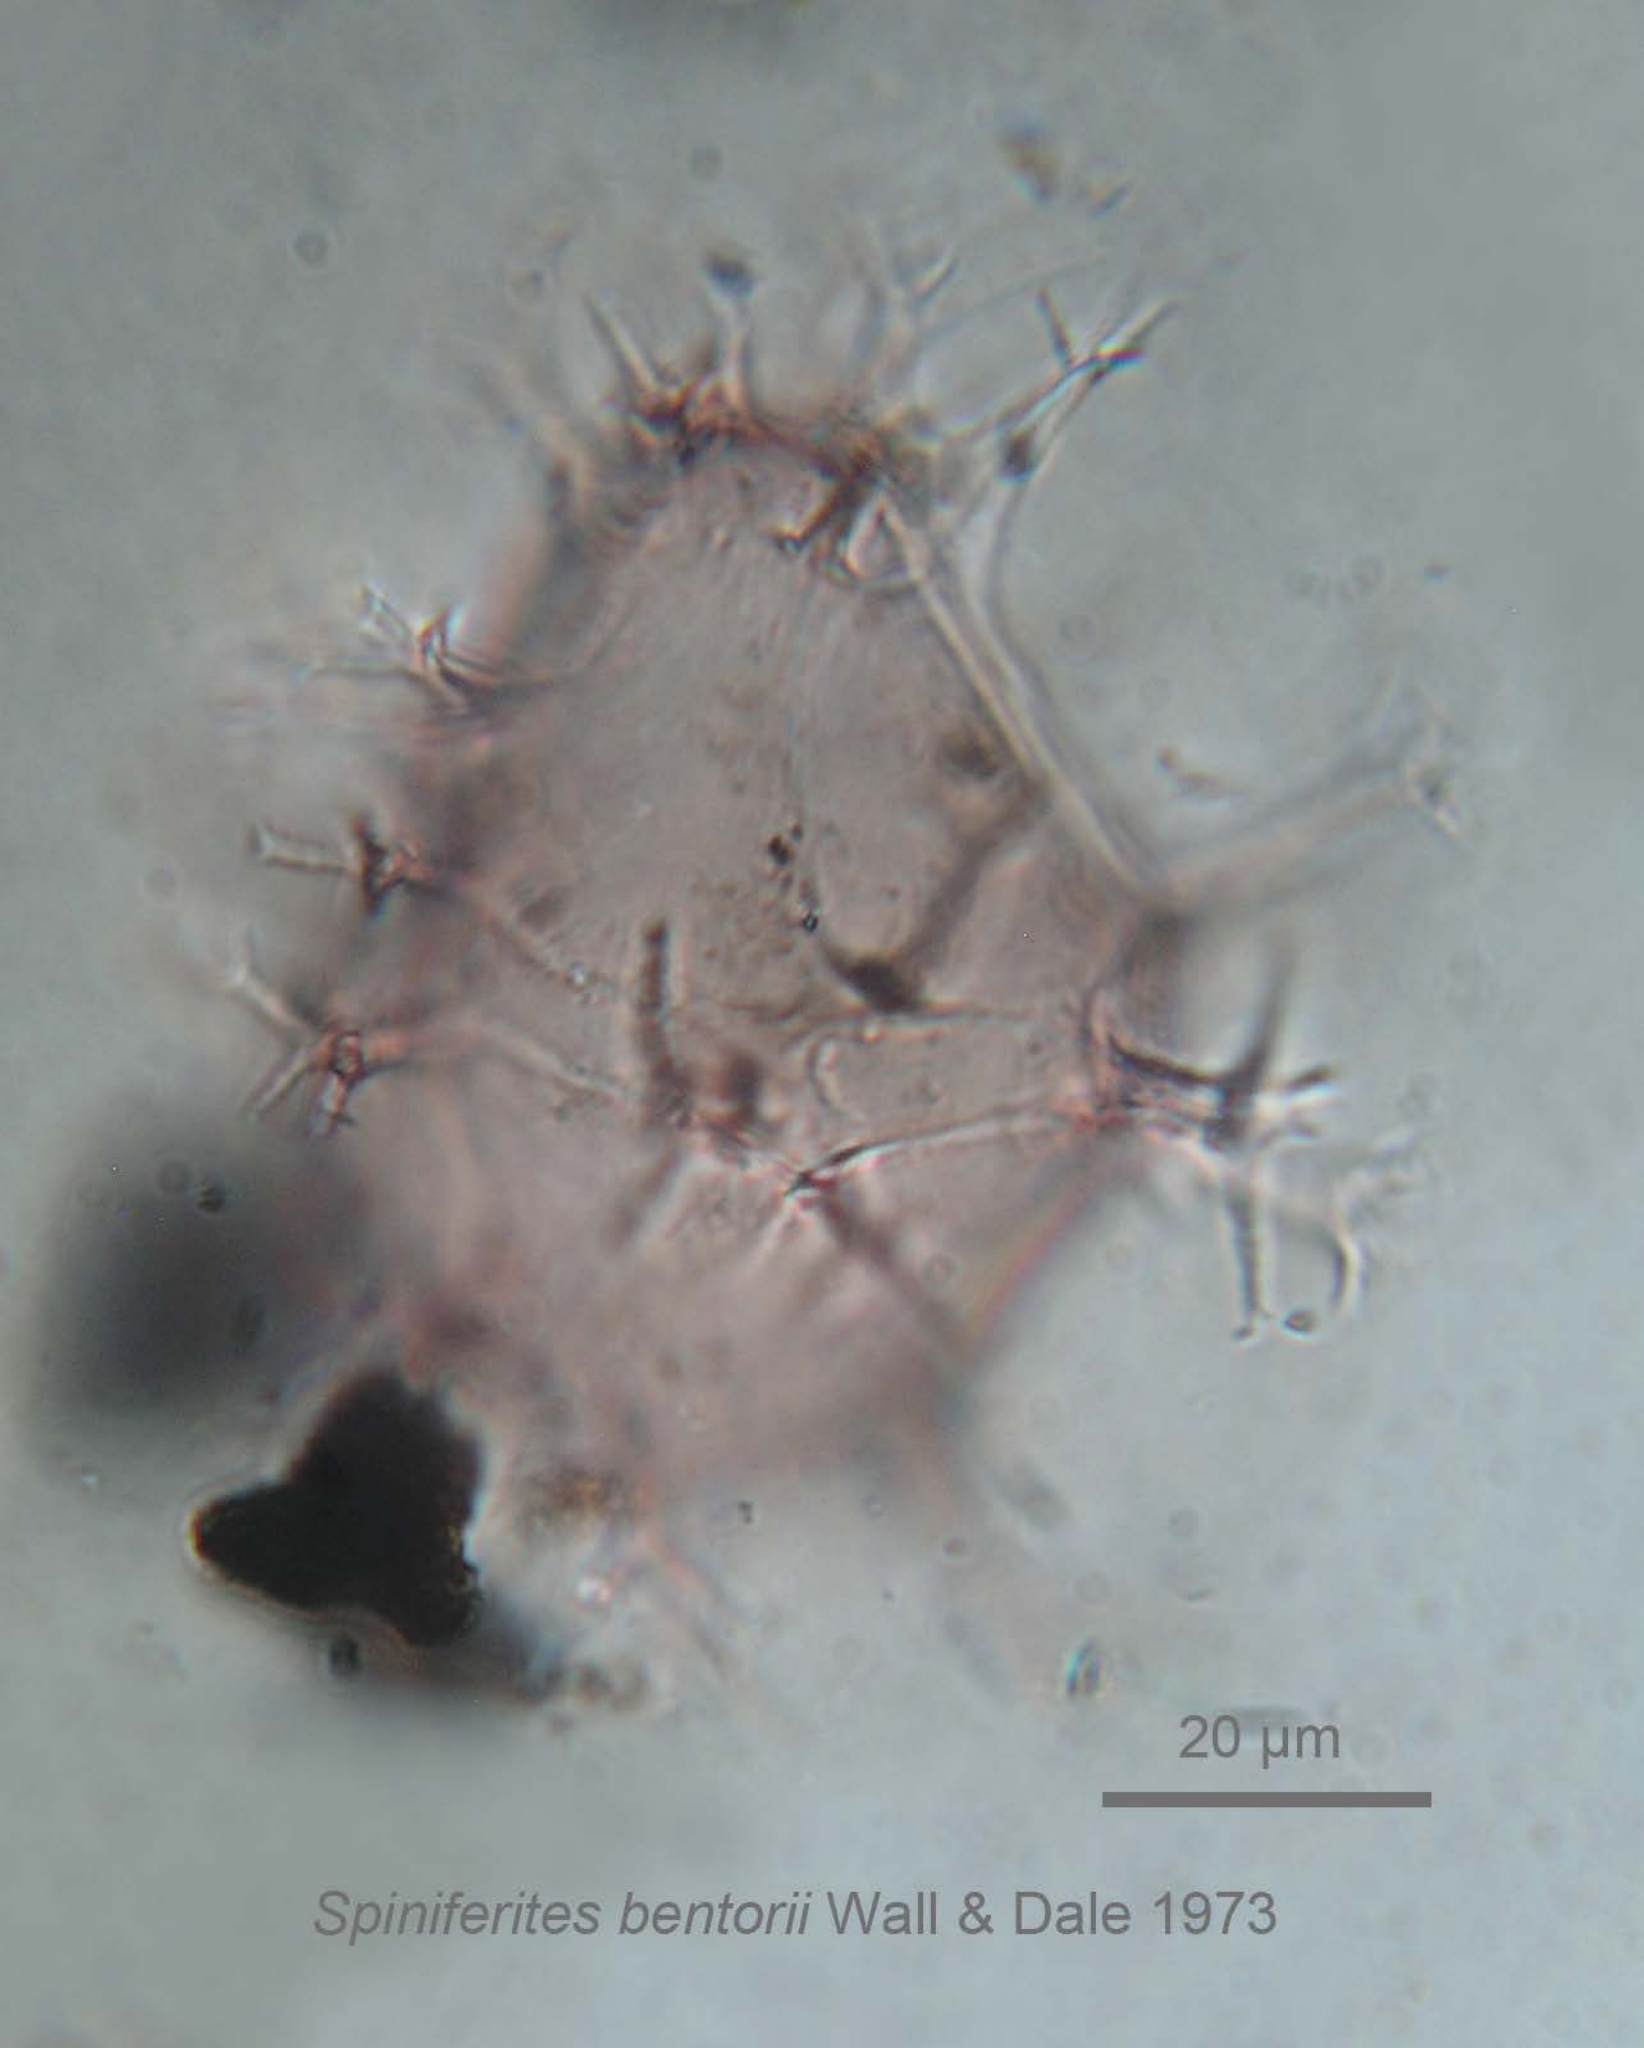

20 μm

*Spiniferites bentorii* Wall & Dale 1973

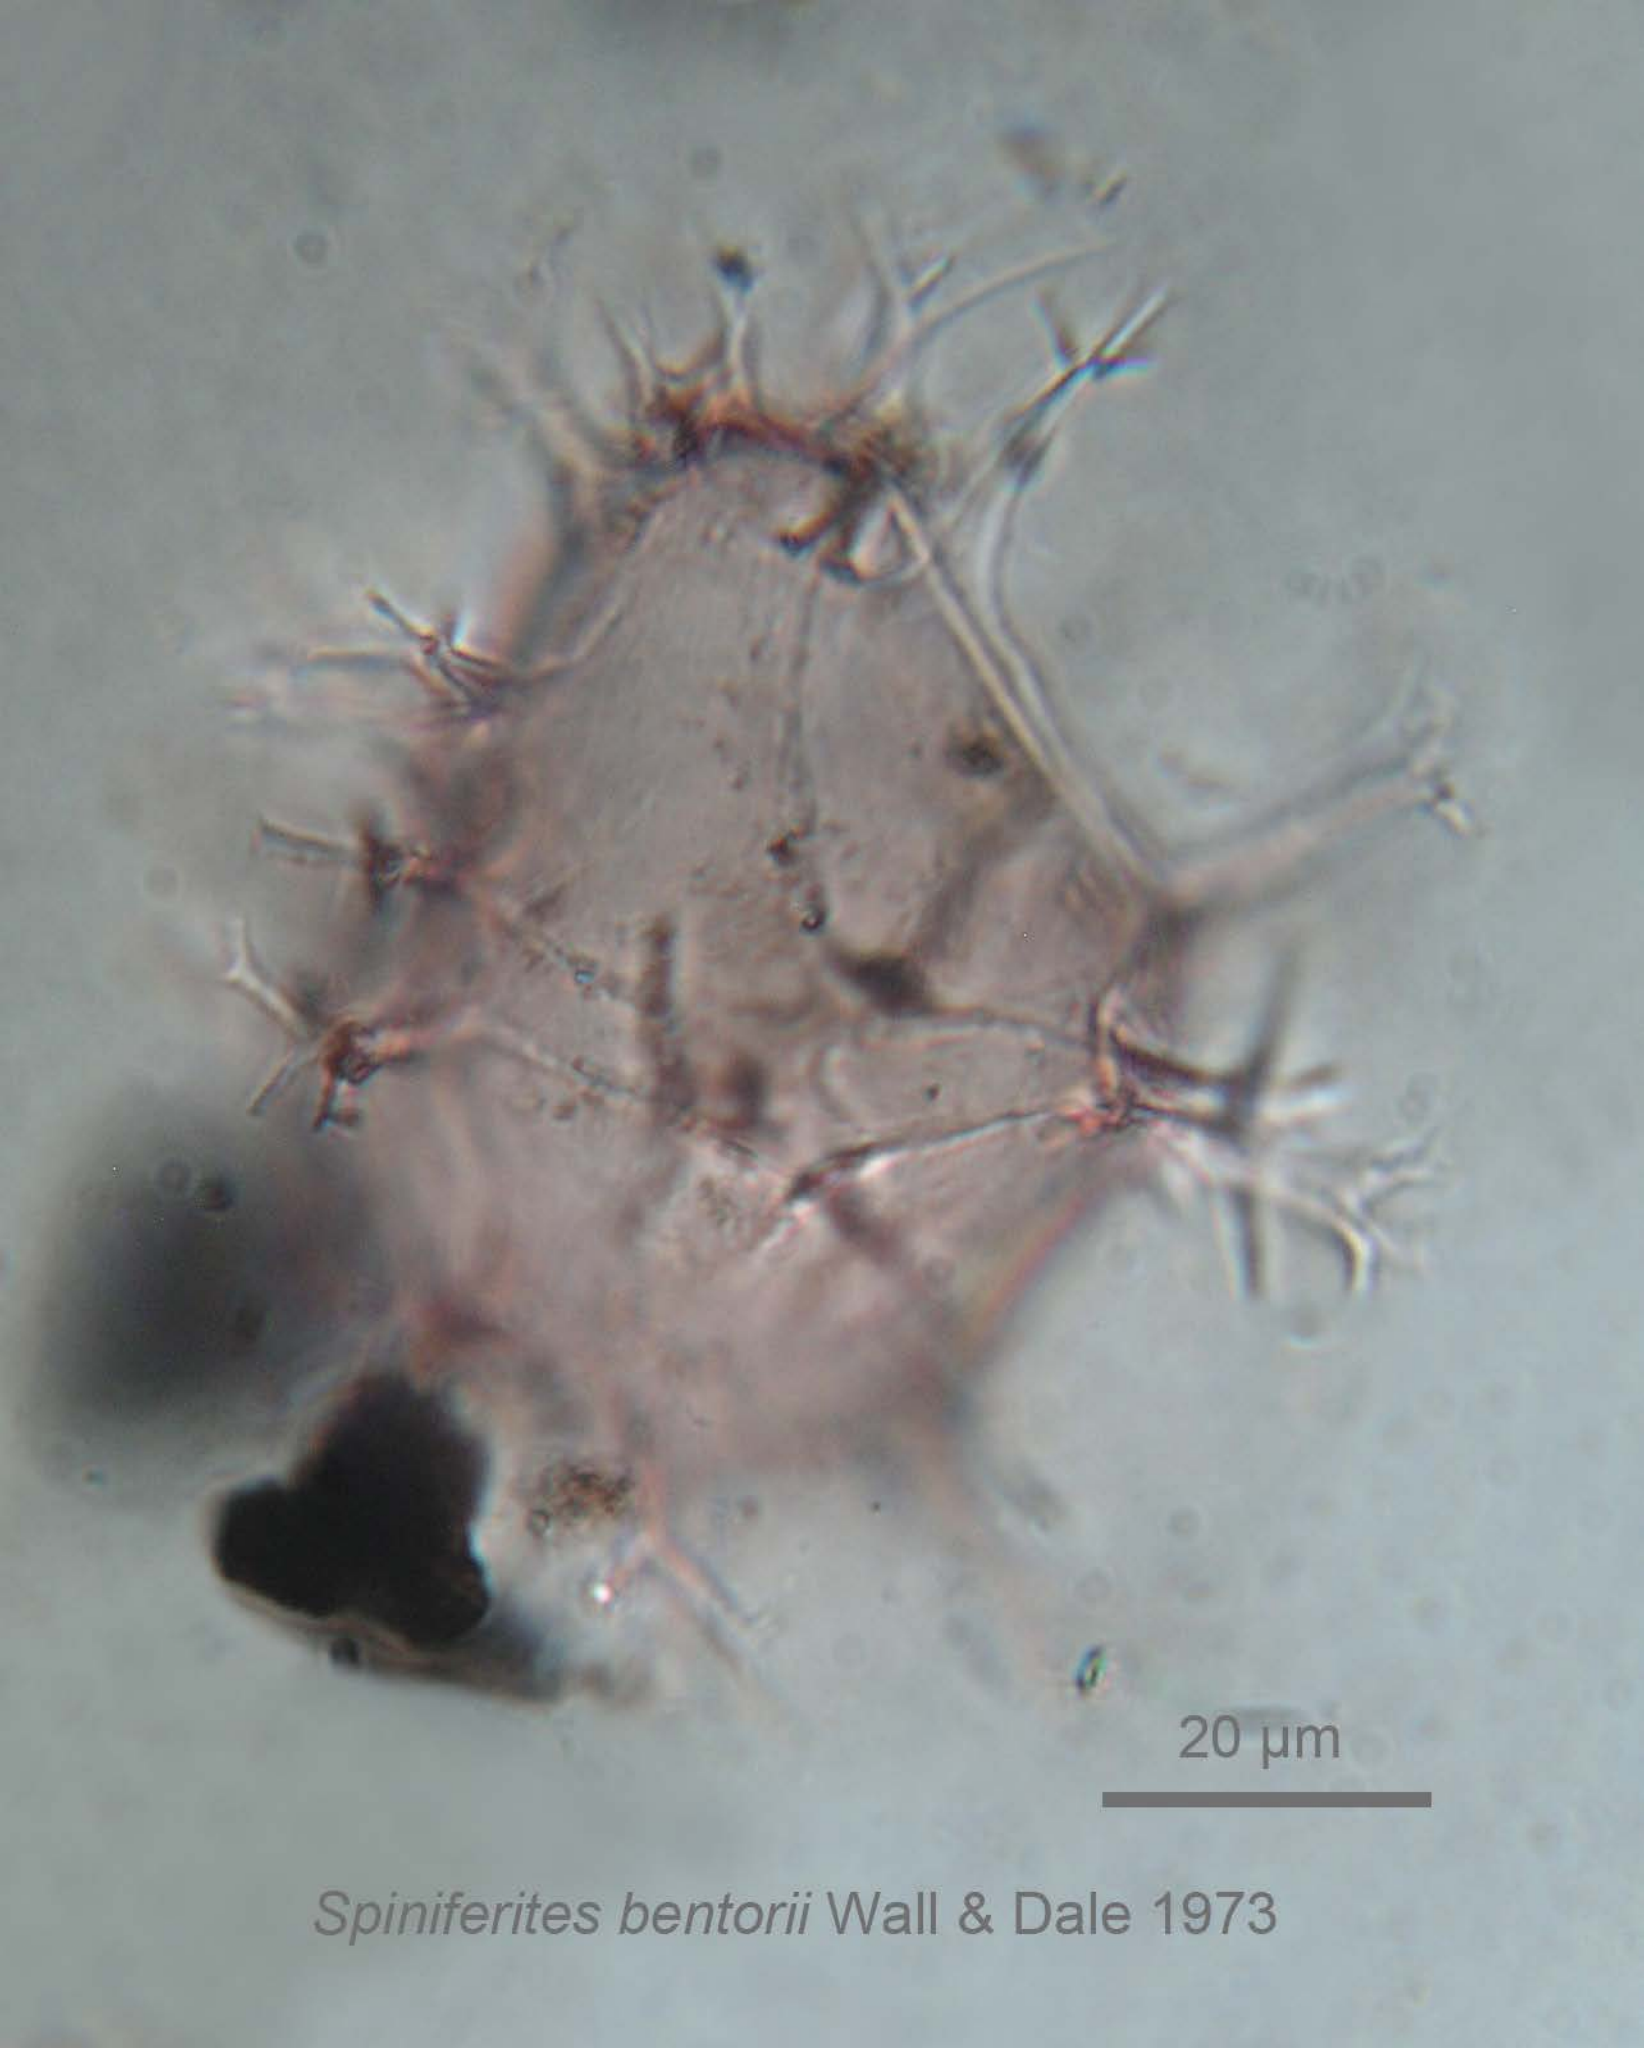

20 μm

*Spiniferites bentorii* Wall & Dale 1973



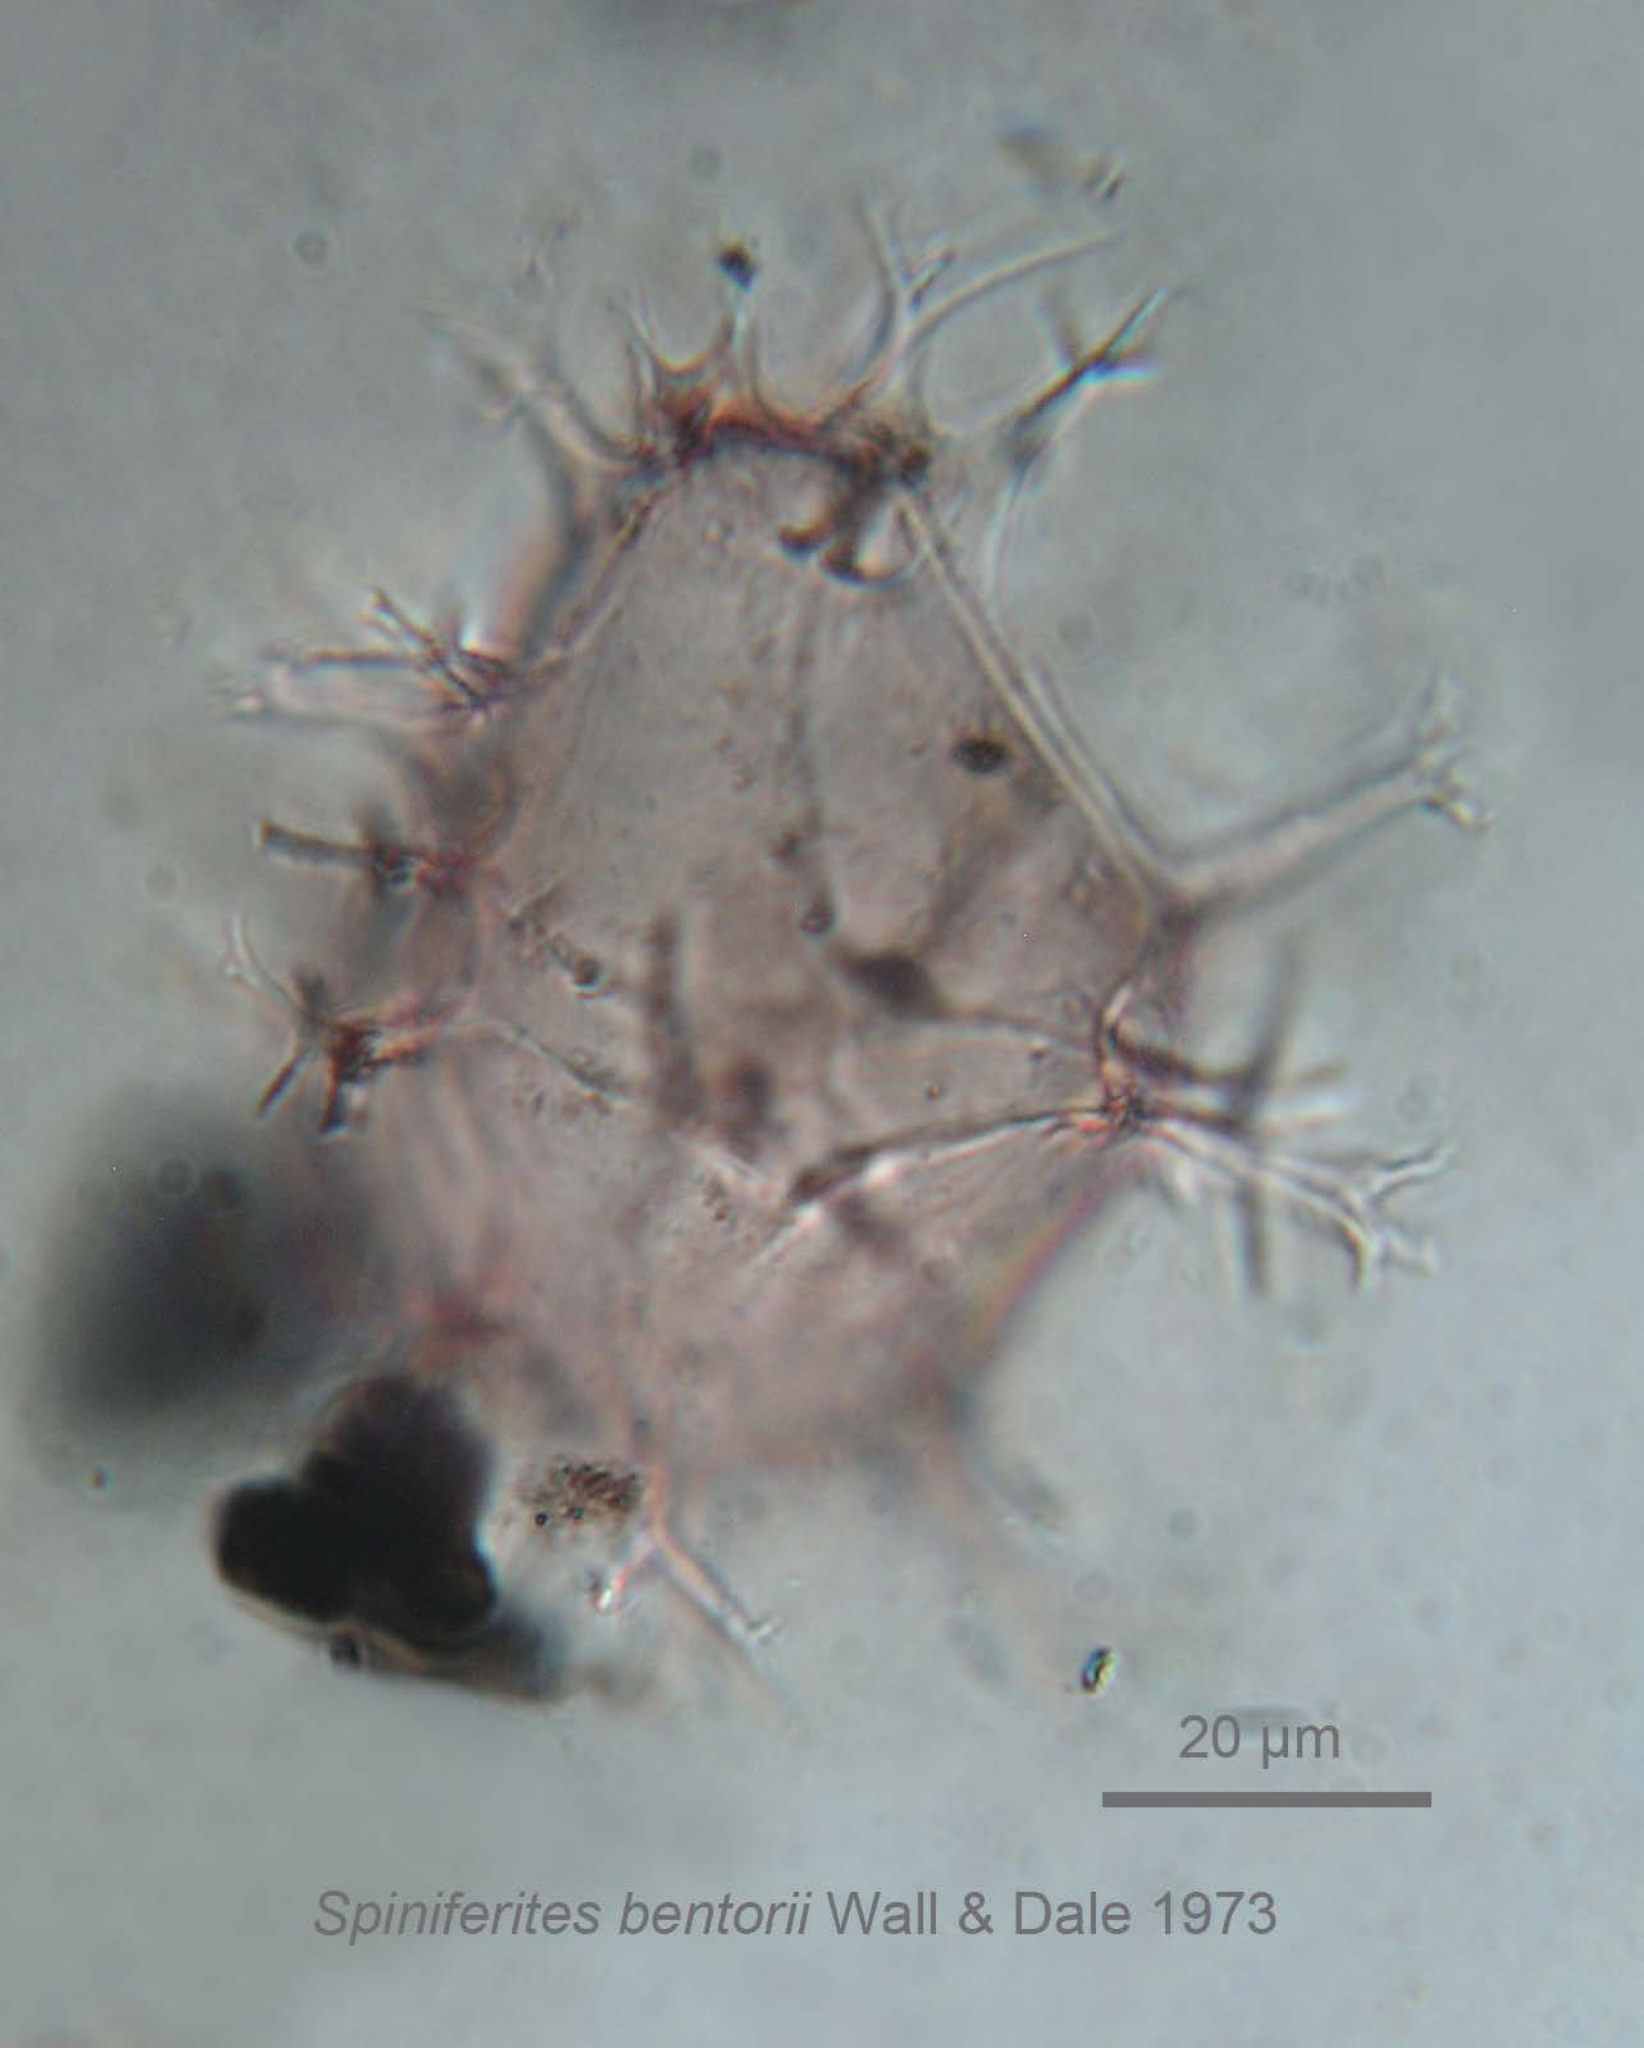

20 μm

*Spiniferites bentorii* Wall & Dale 1973

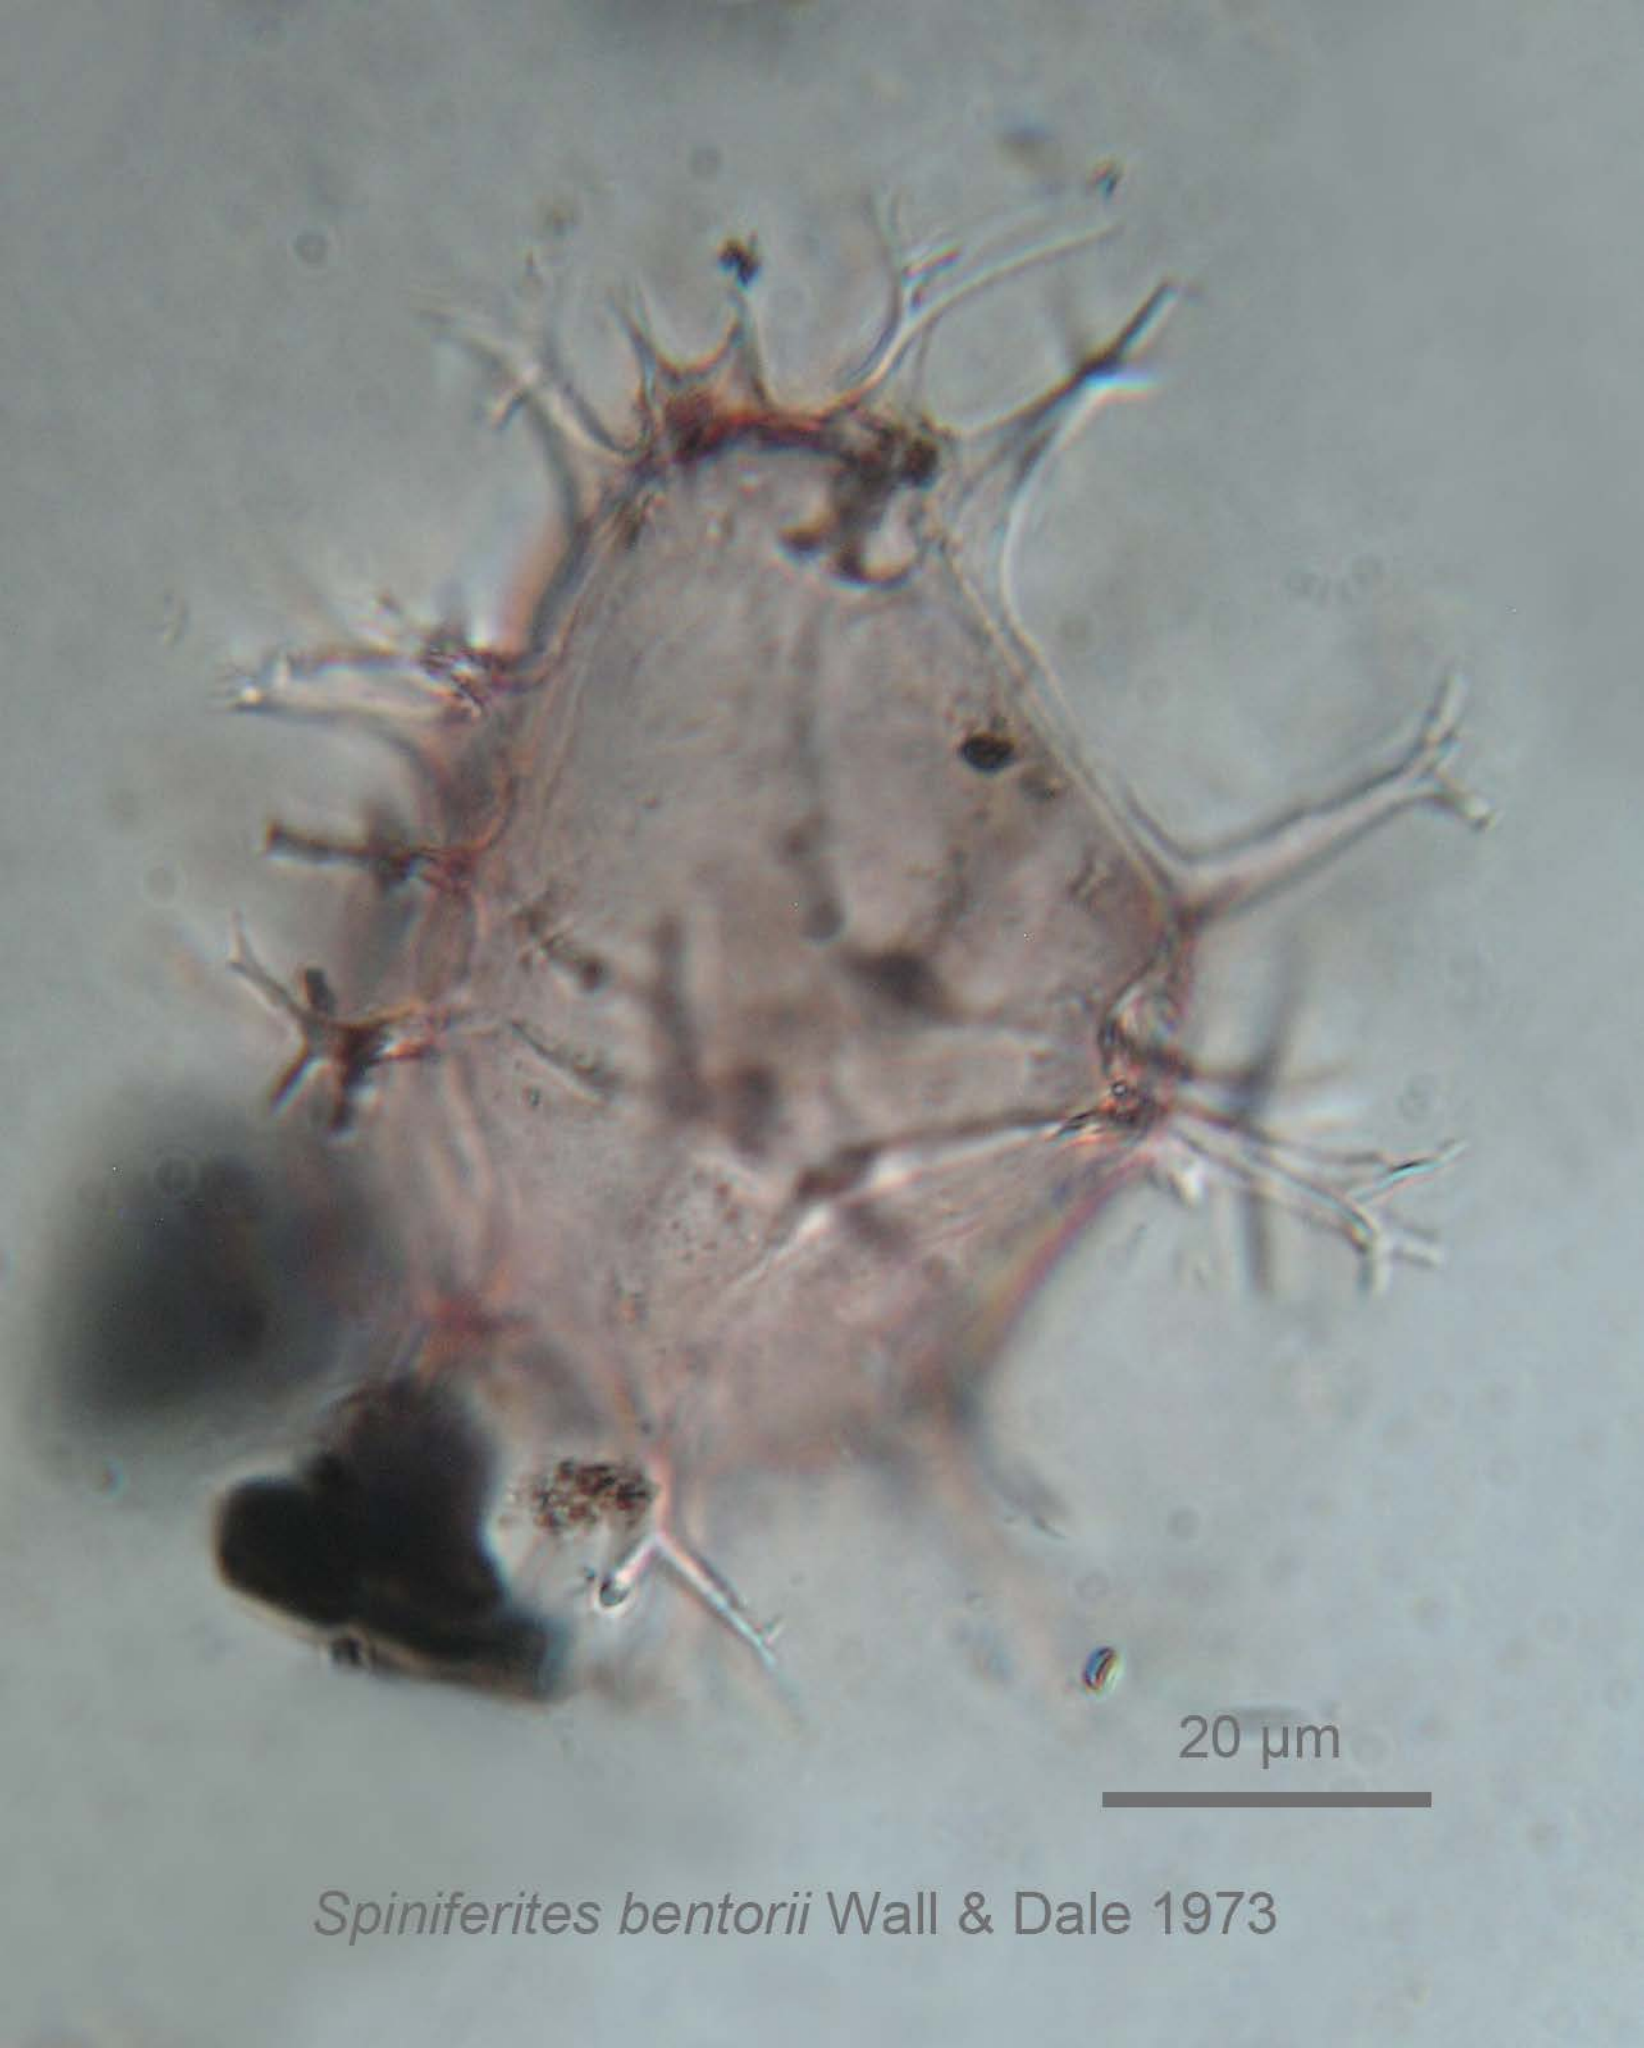

20 μm

*Spiniferites bentorii* Wall & Dale 1973



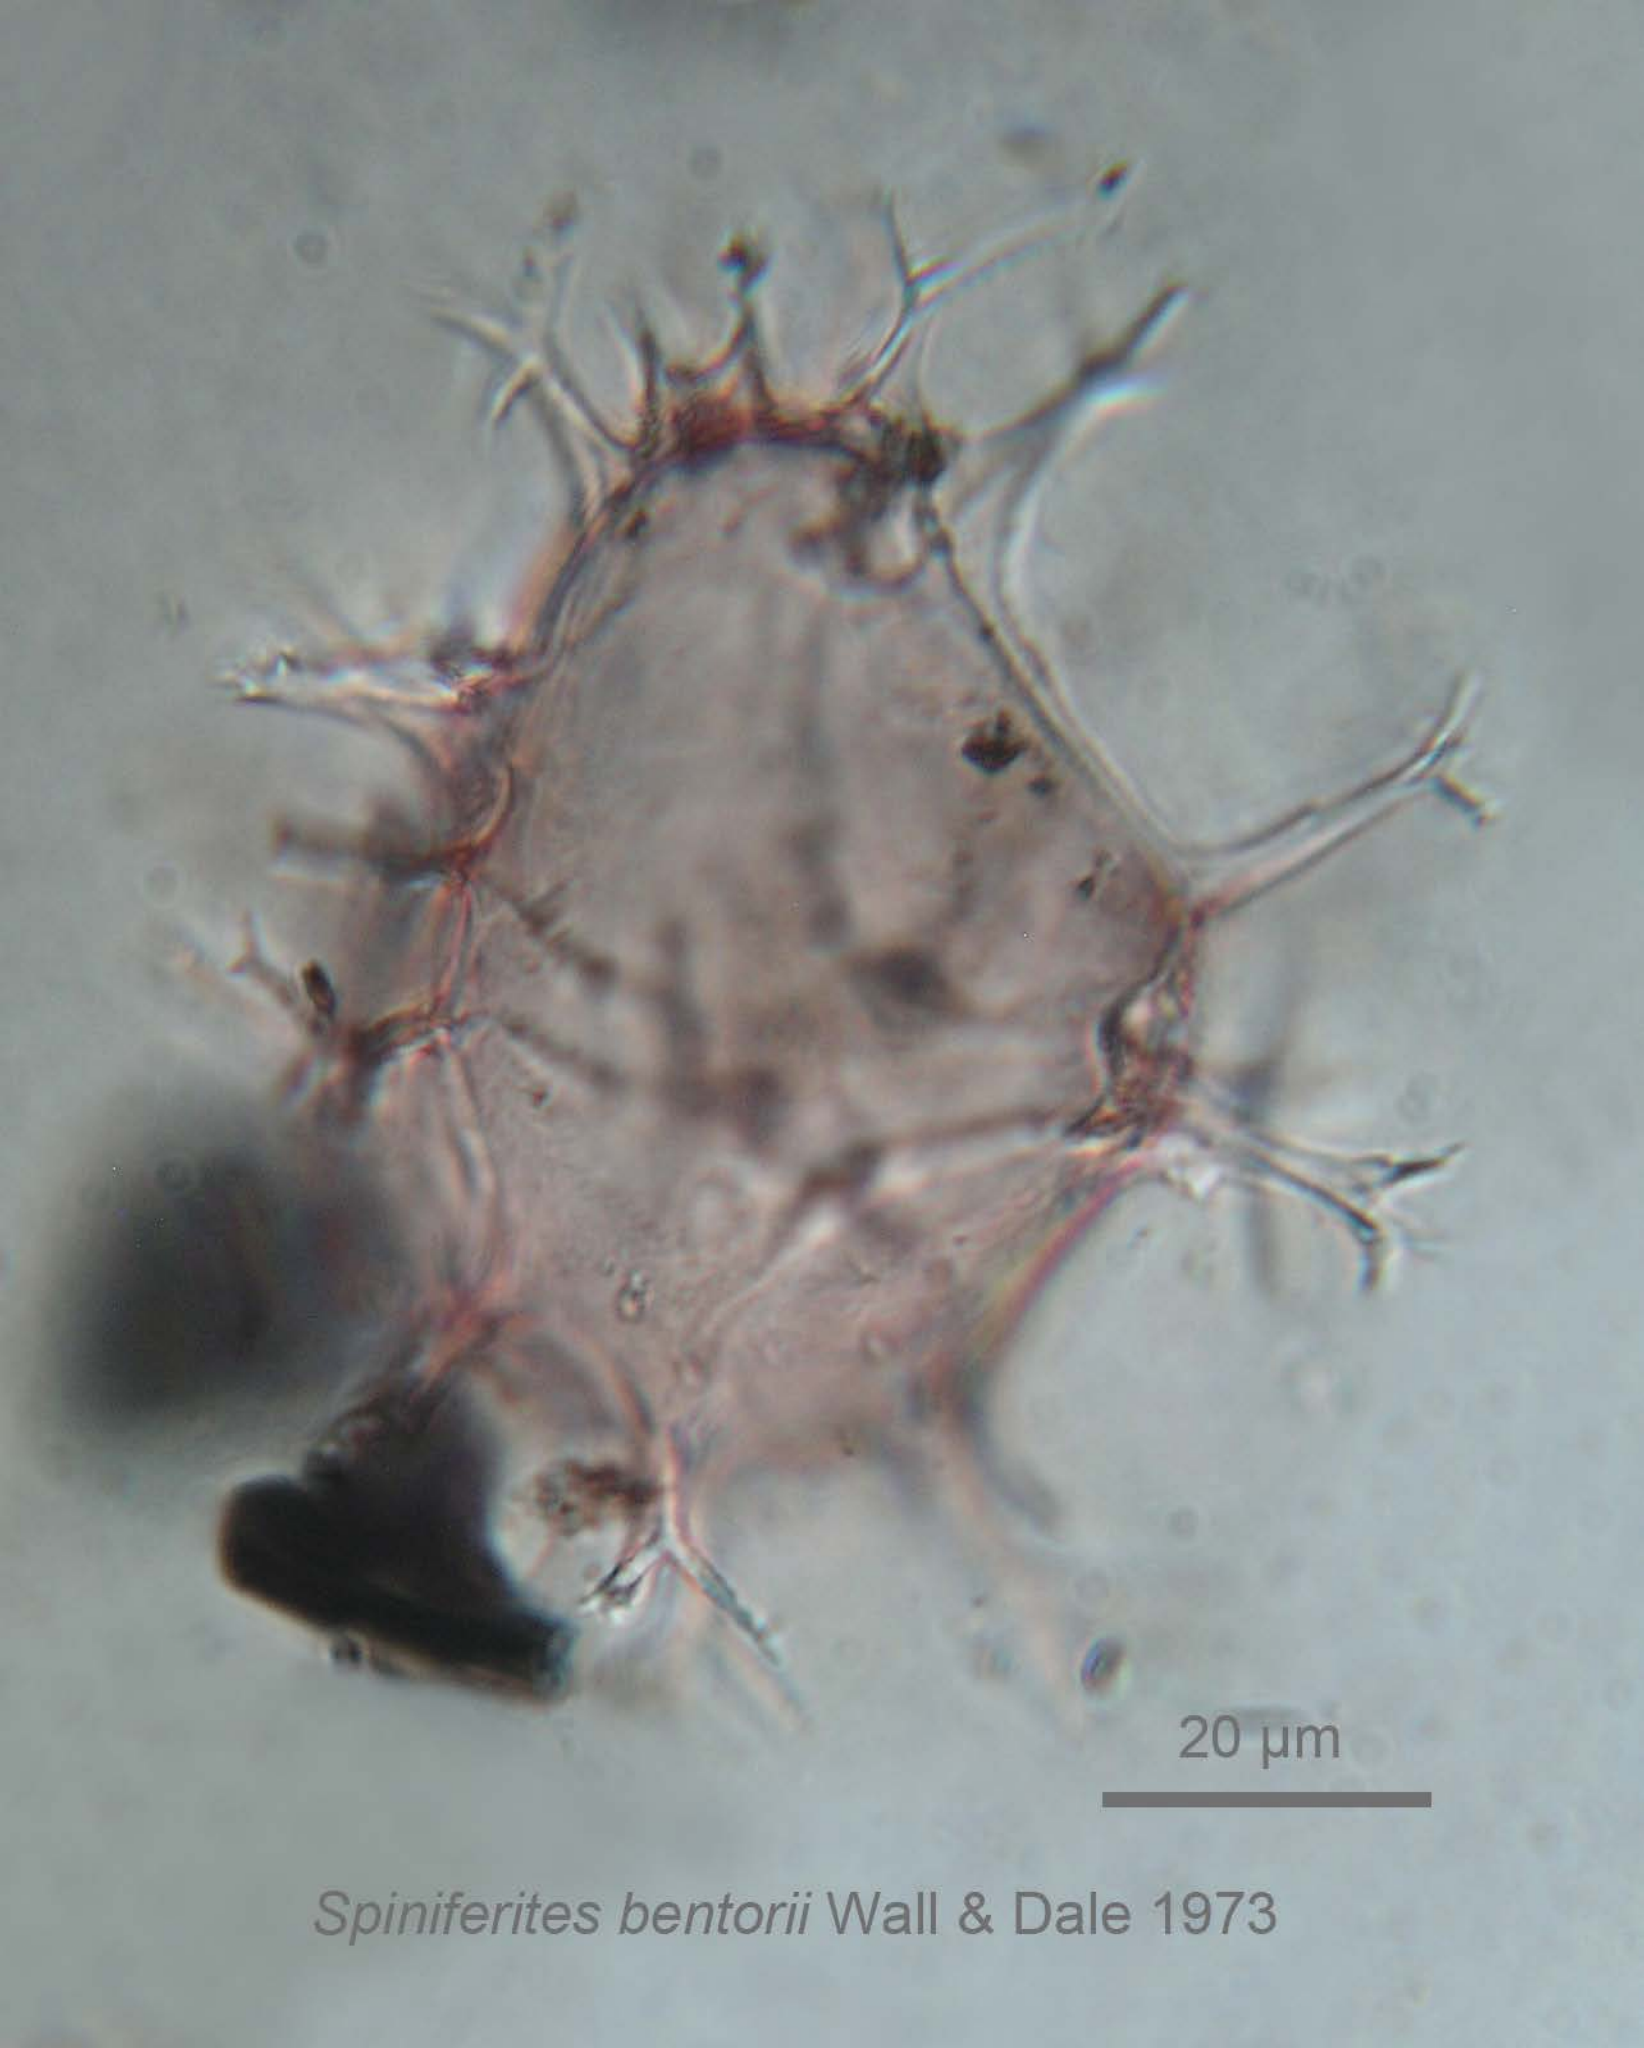

20 μm

*Spiniferites bentorii* Wall & Dale 1973



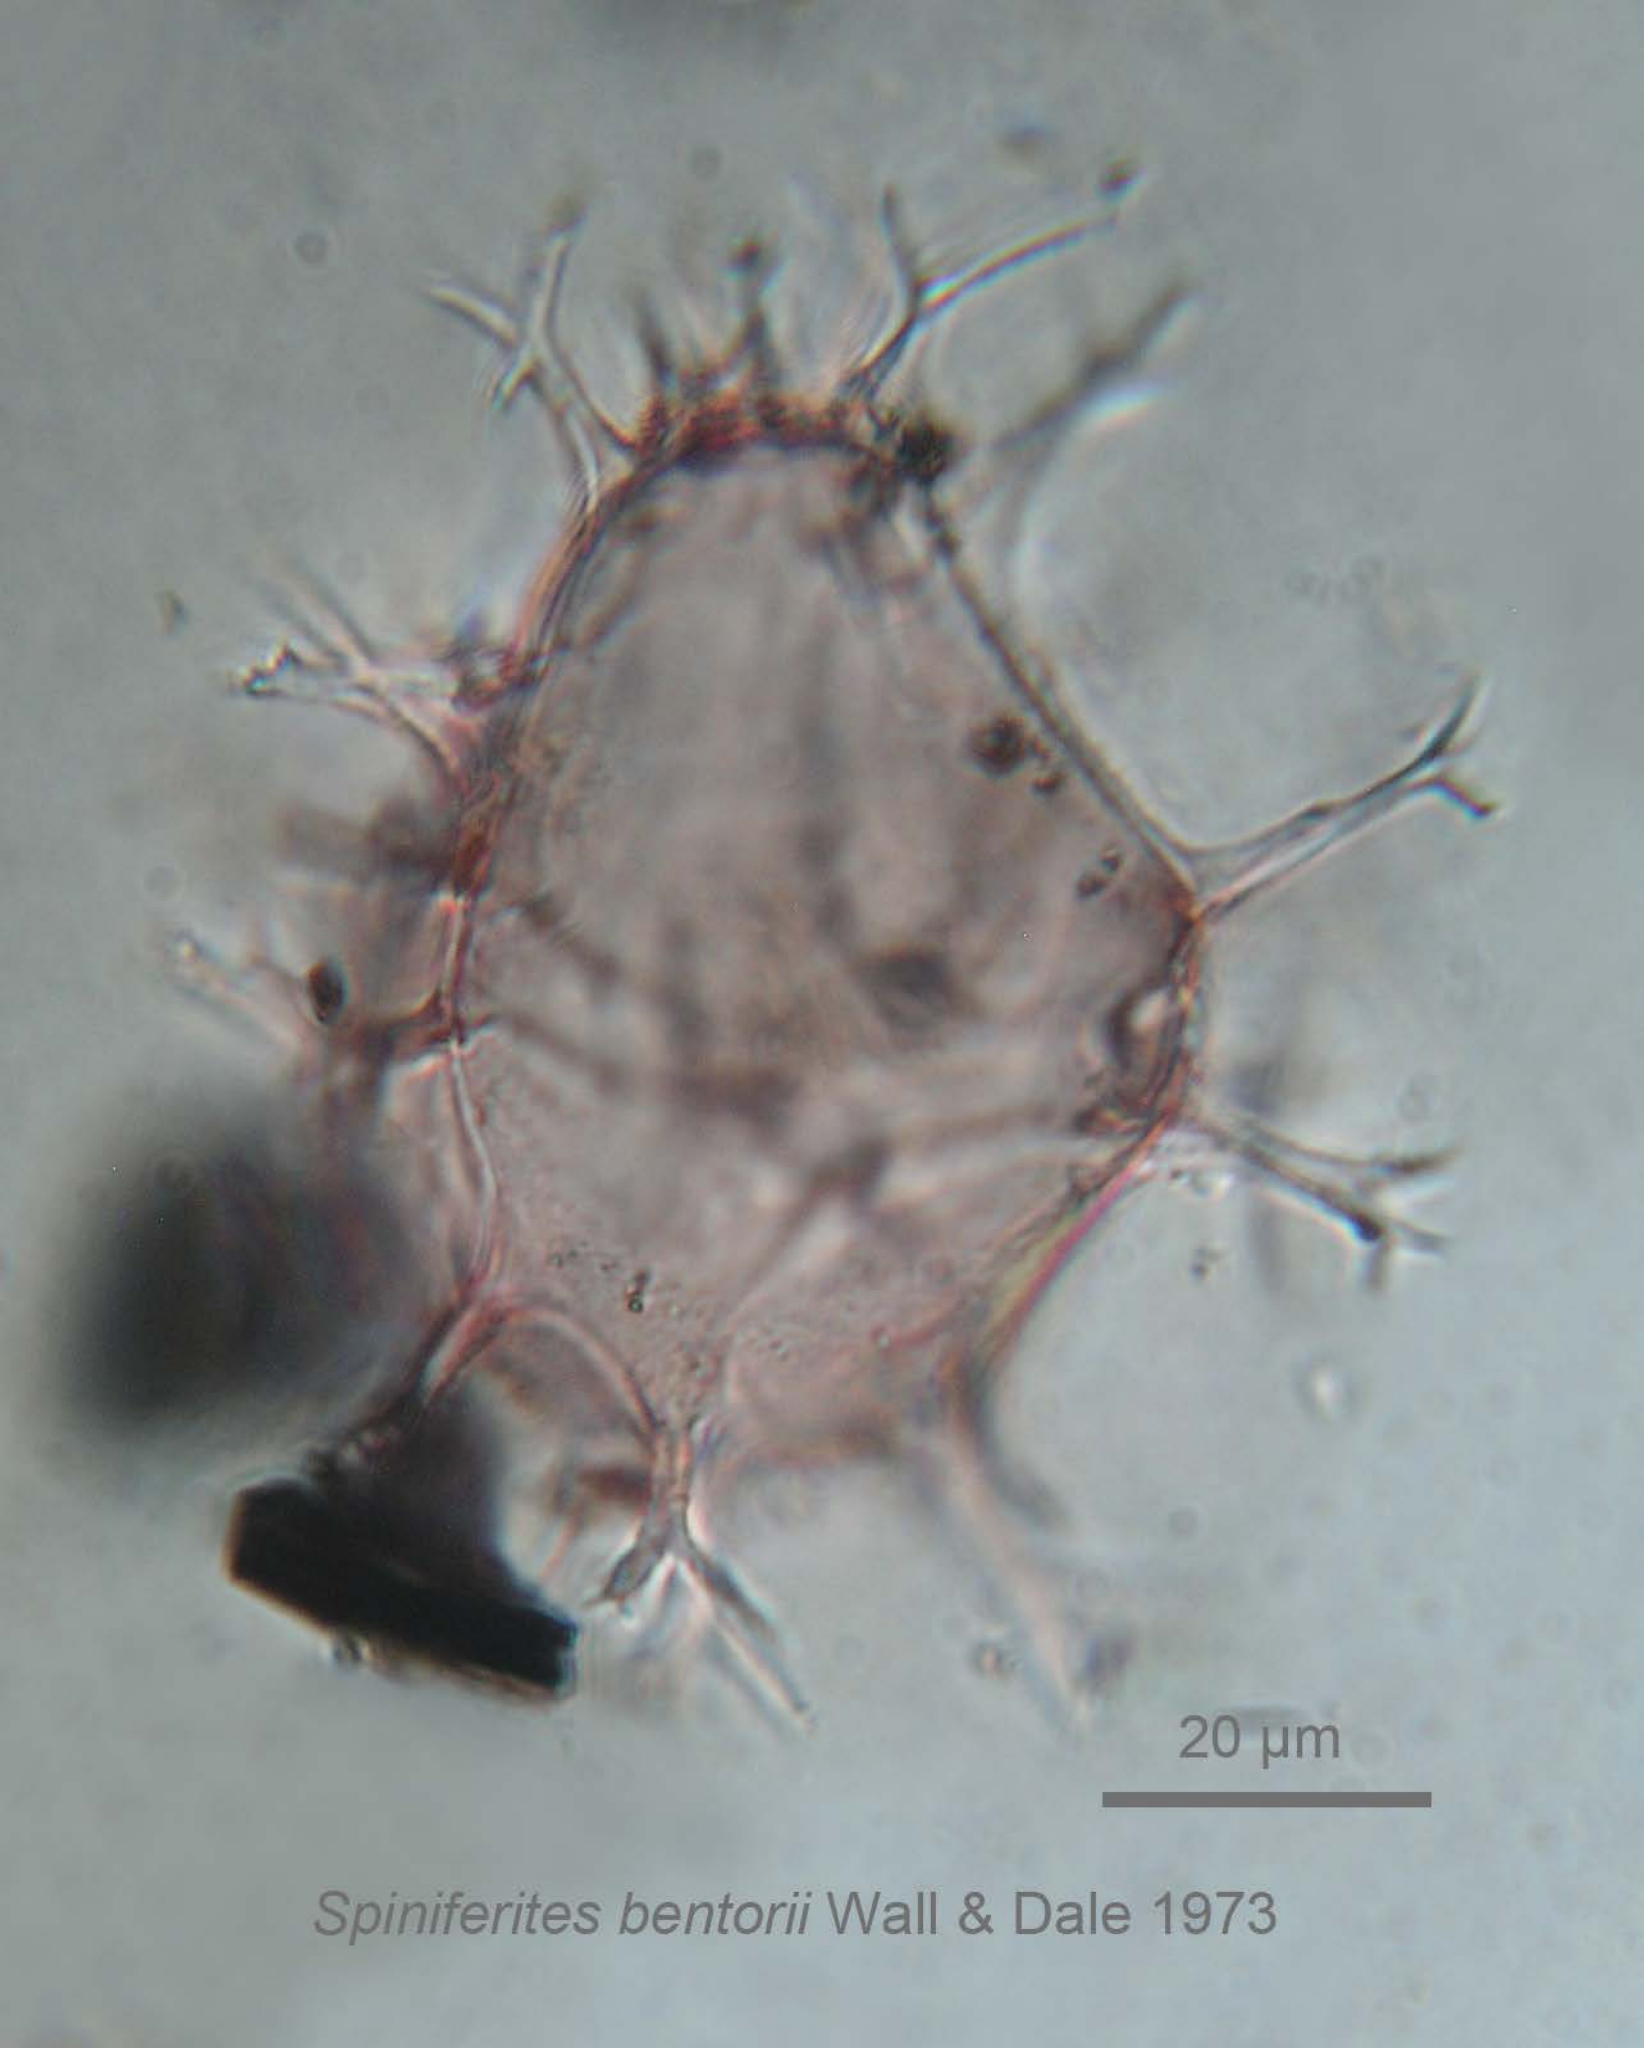

20 μm

*Spiniferites bentorii* Wall & Dale 1973

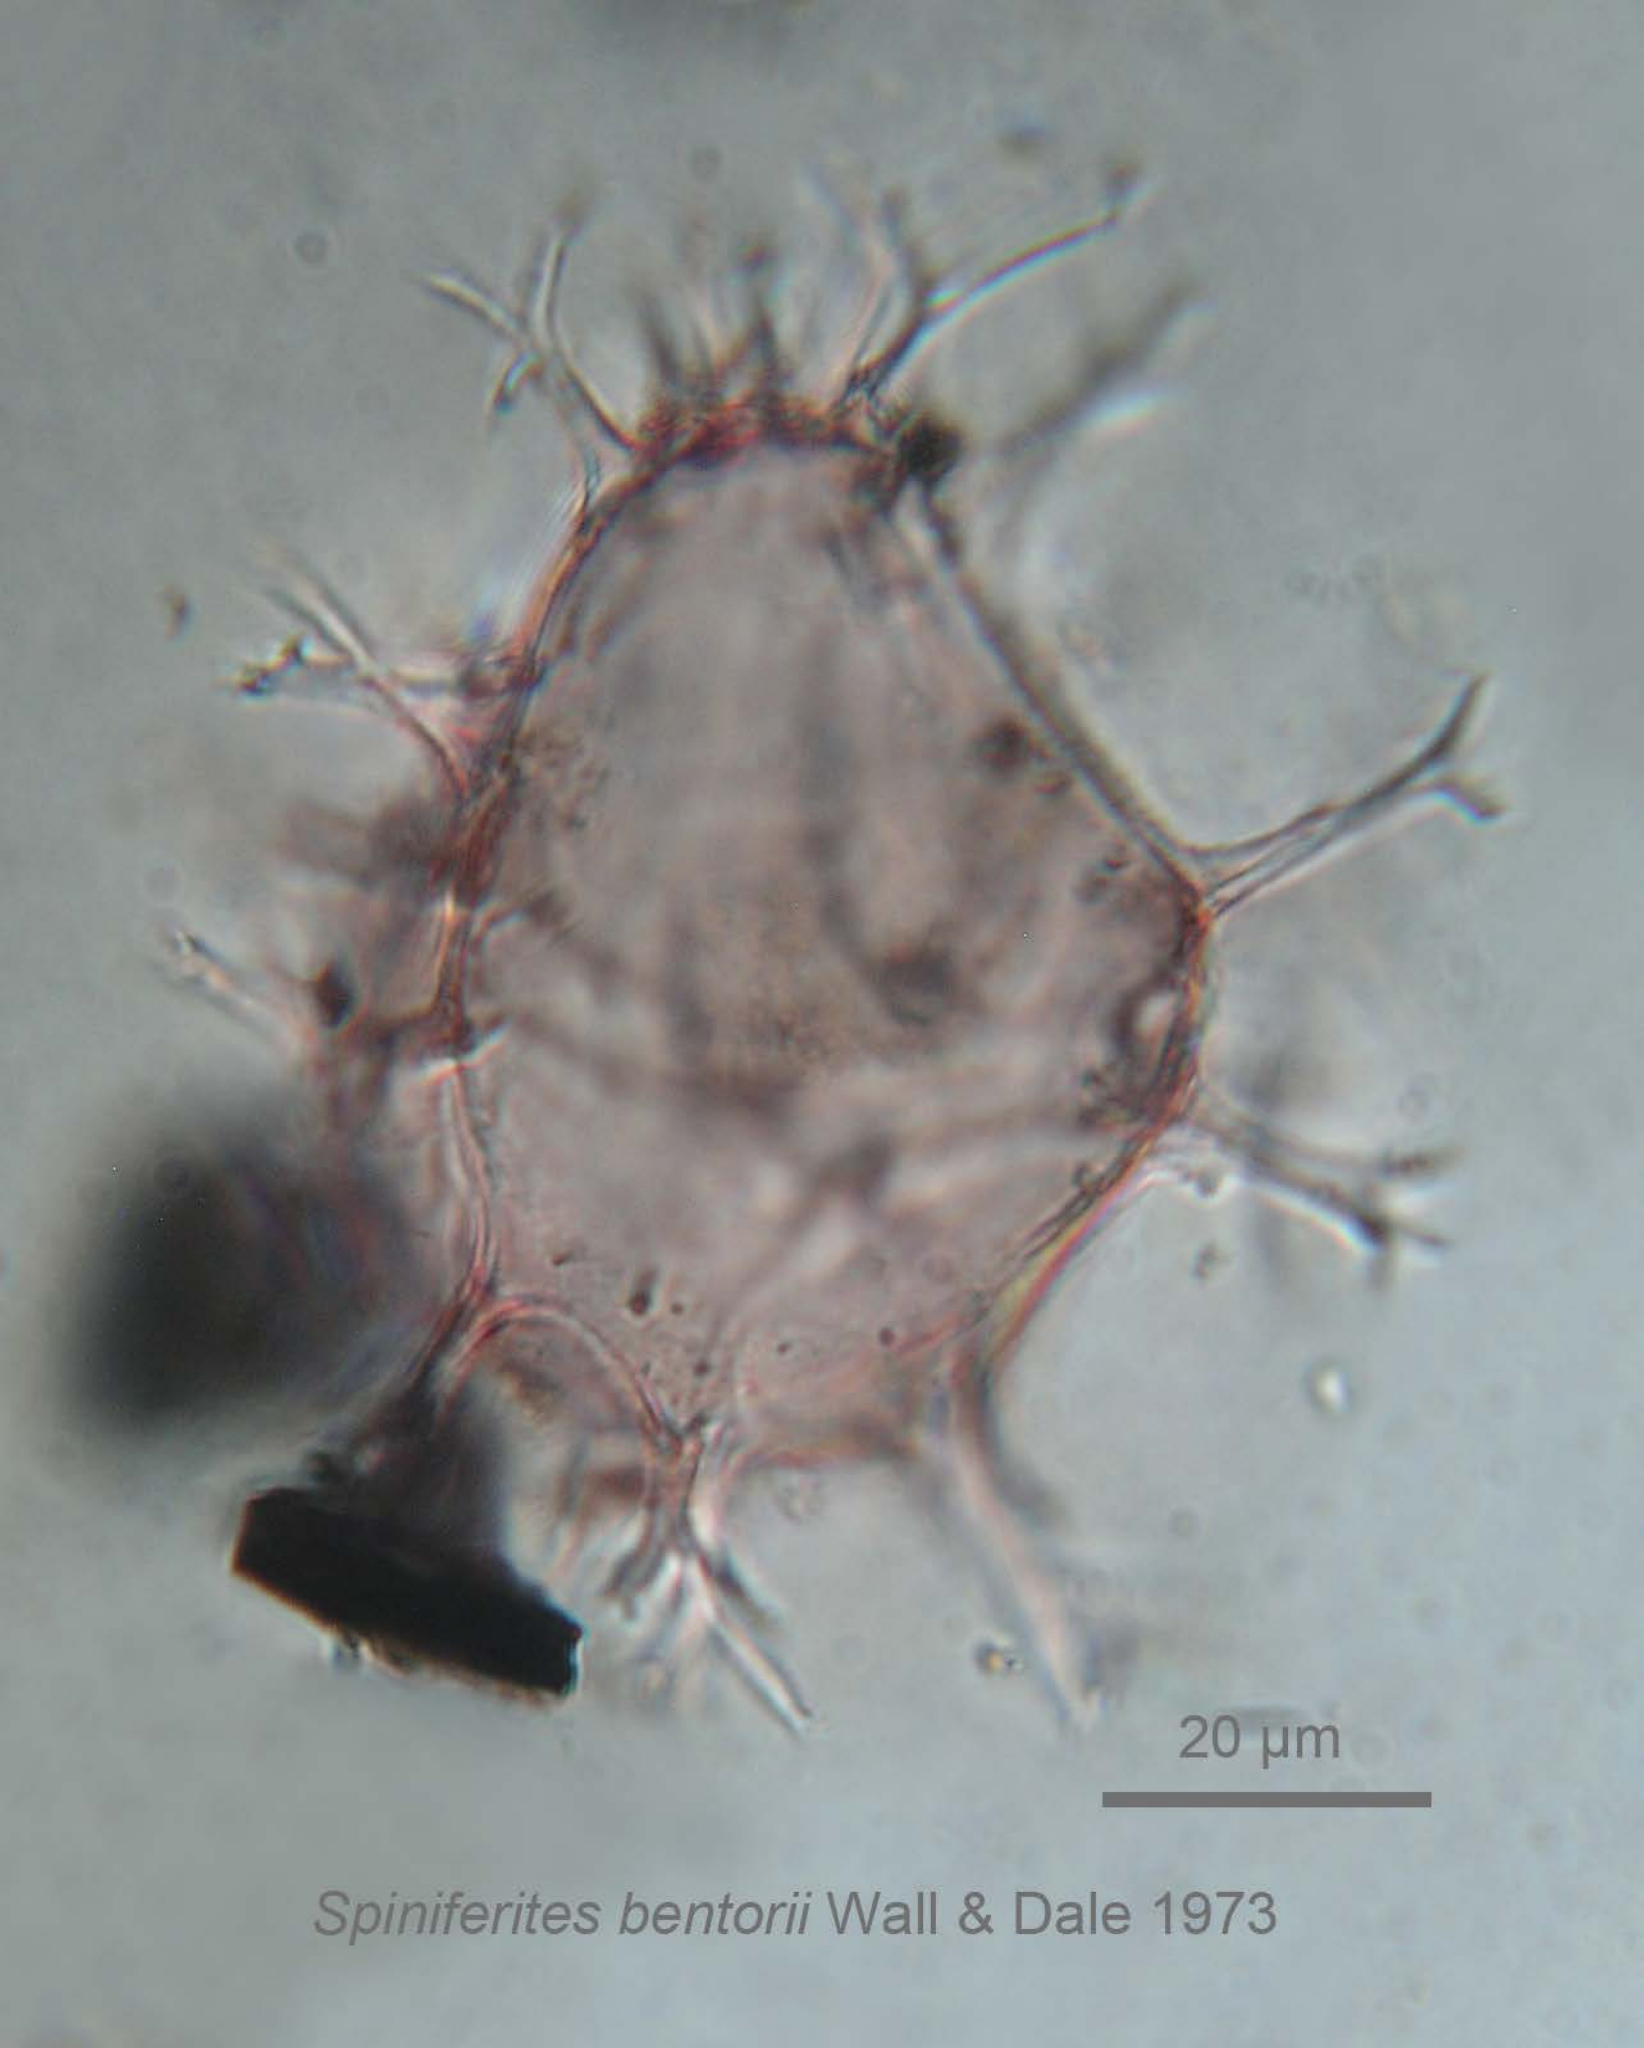

20 μm

*Spiniferites bentorii* Wall & Dale 1973



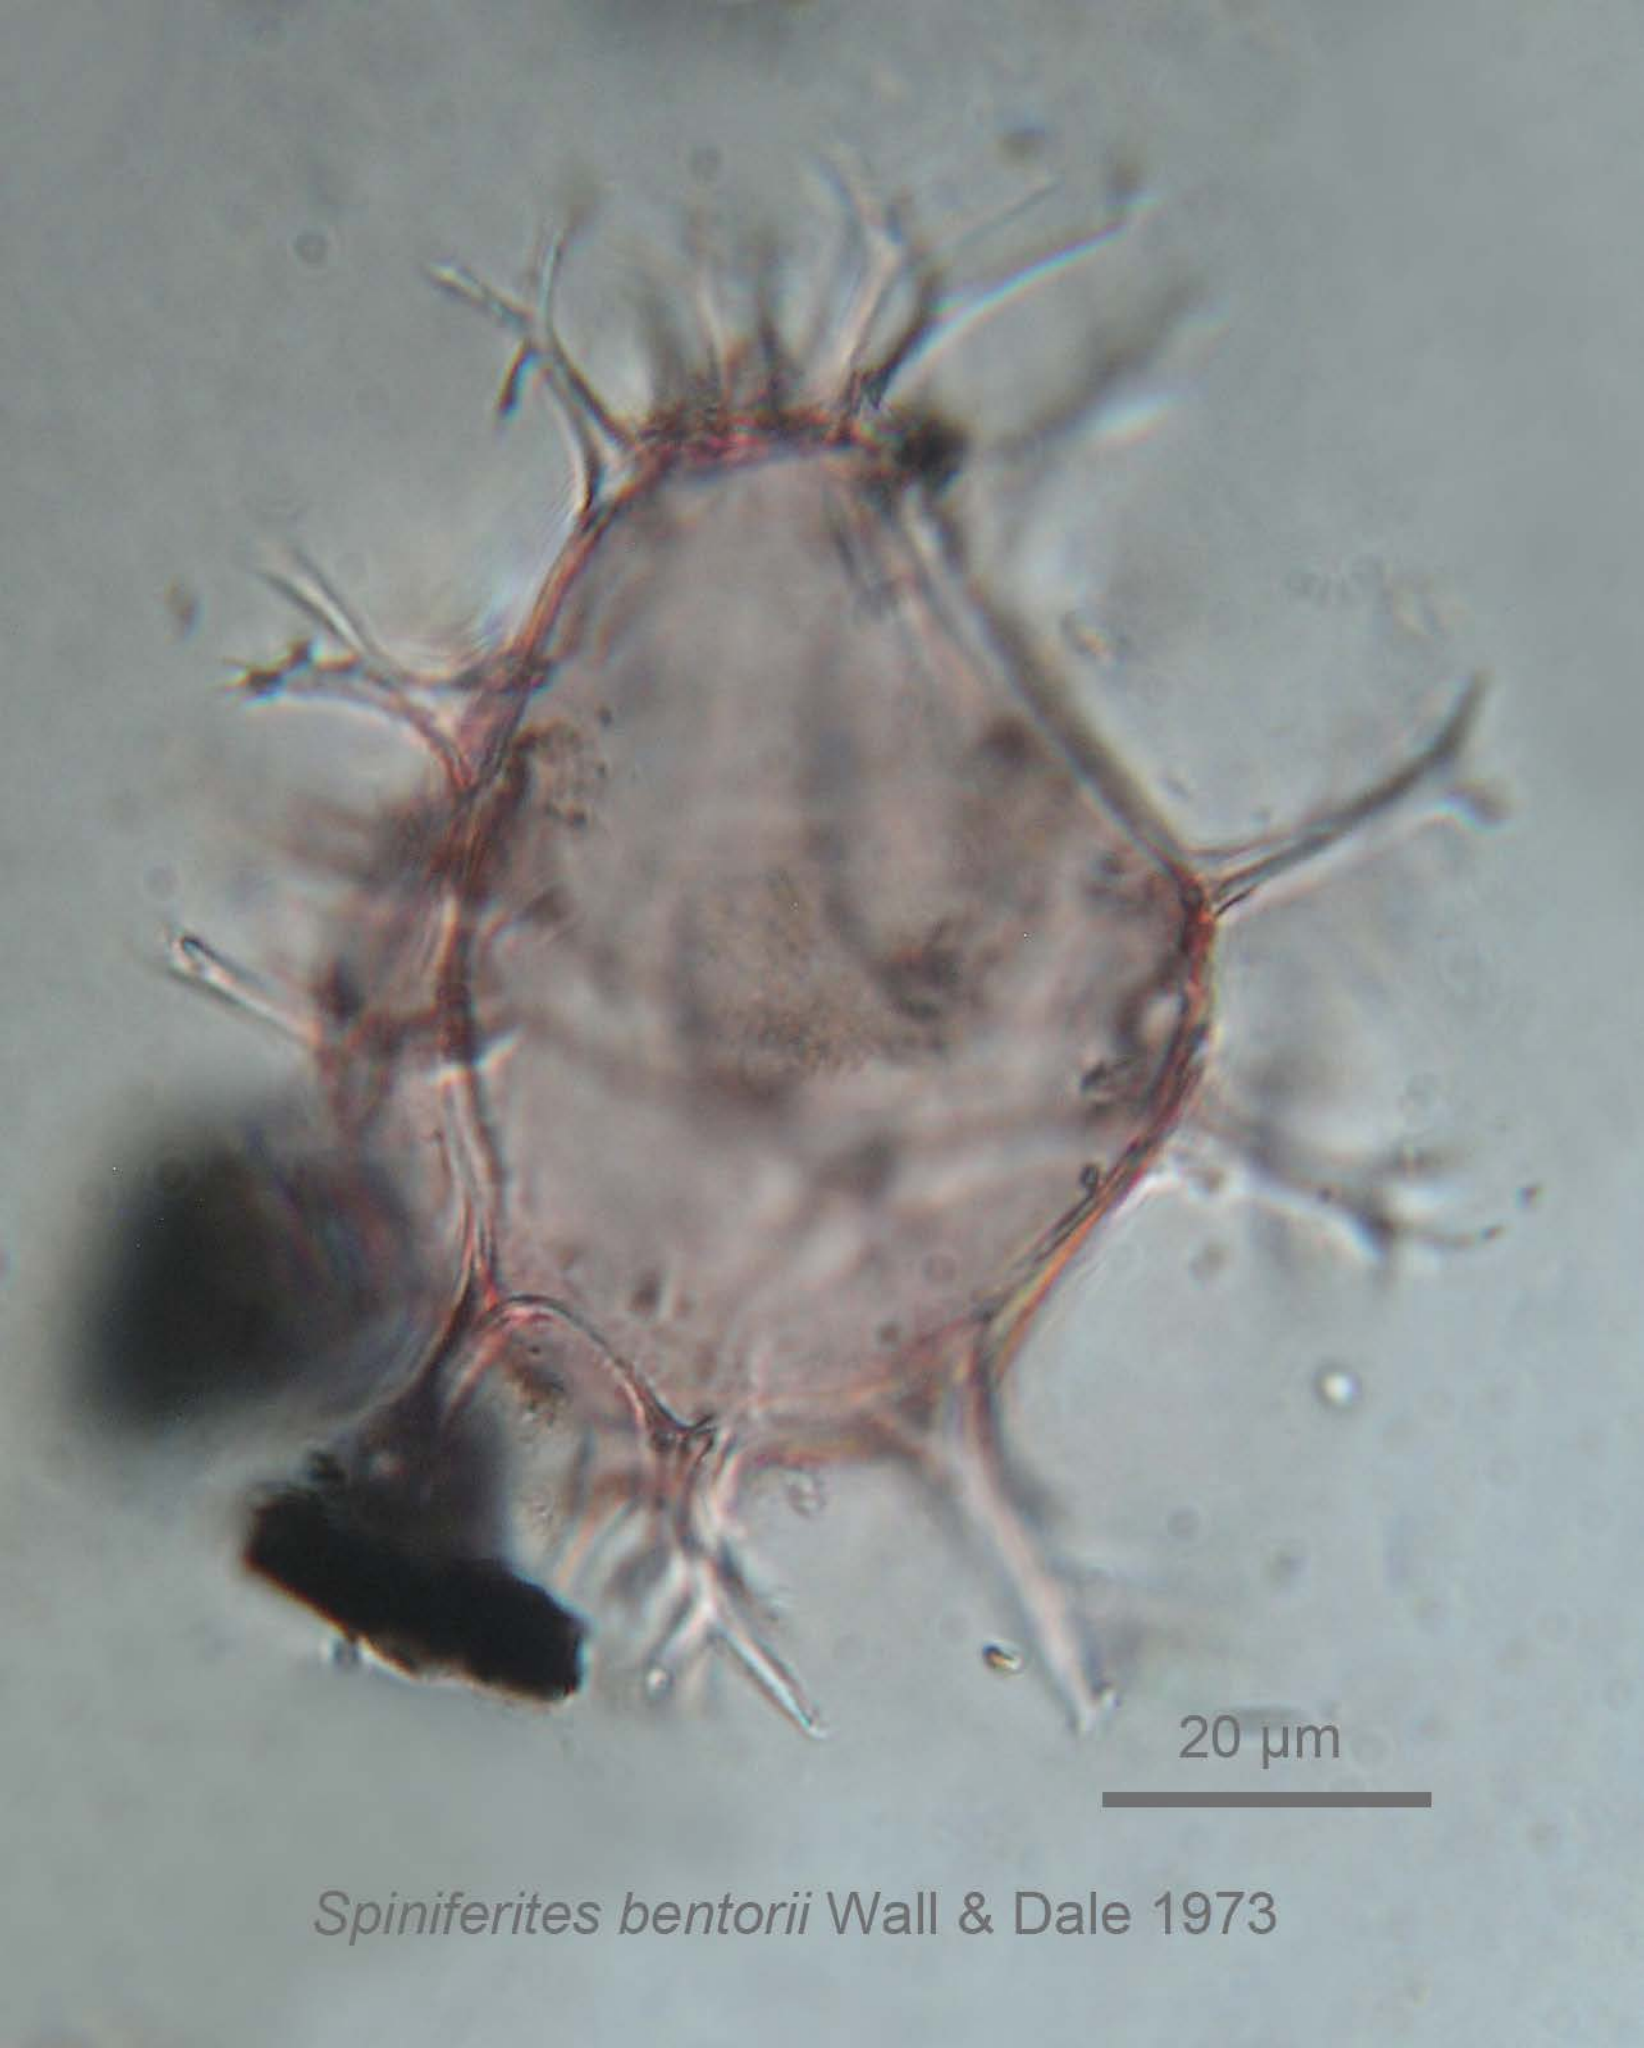

20 μm

*Spiniferites bentorii* Wall & Dale 1973



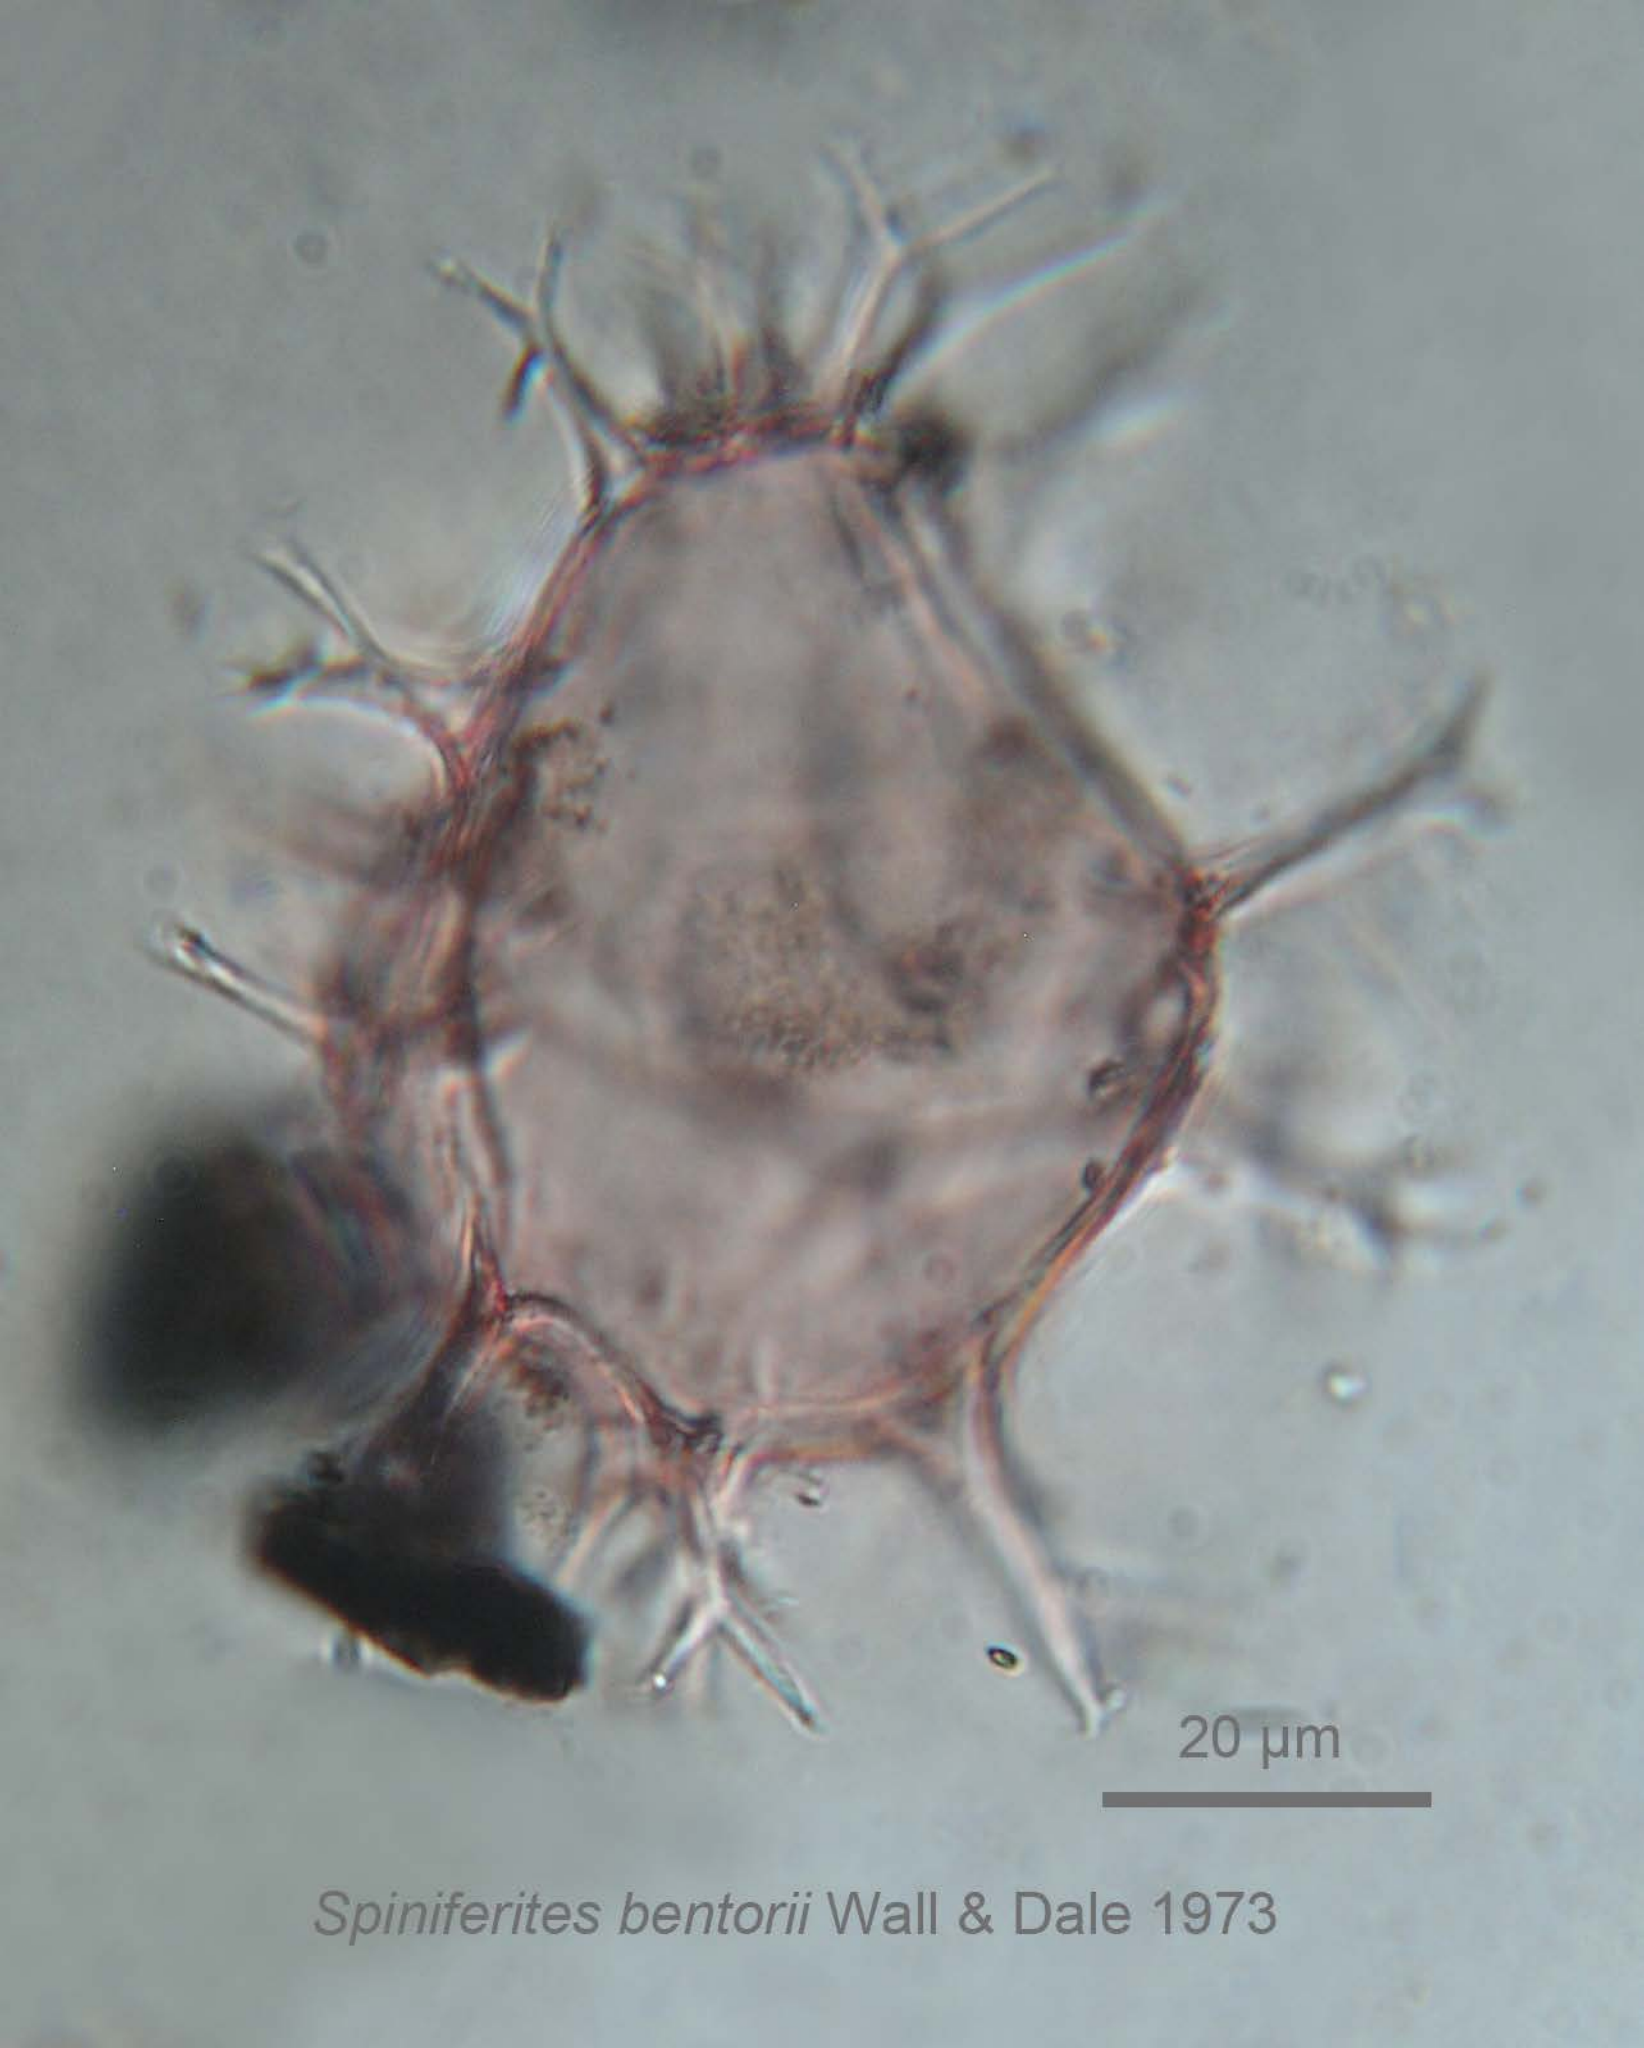

20  $\mu\text{m}$

*Spiniferites bentorii* Wall & Dale 1973

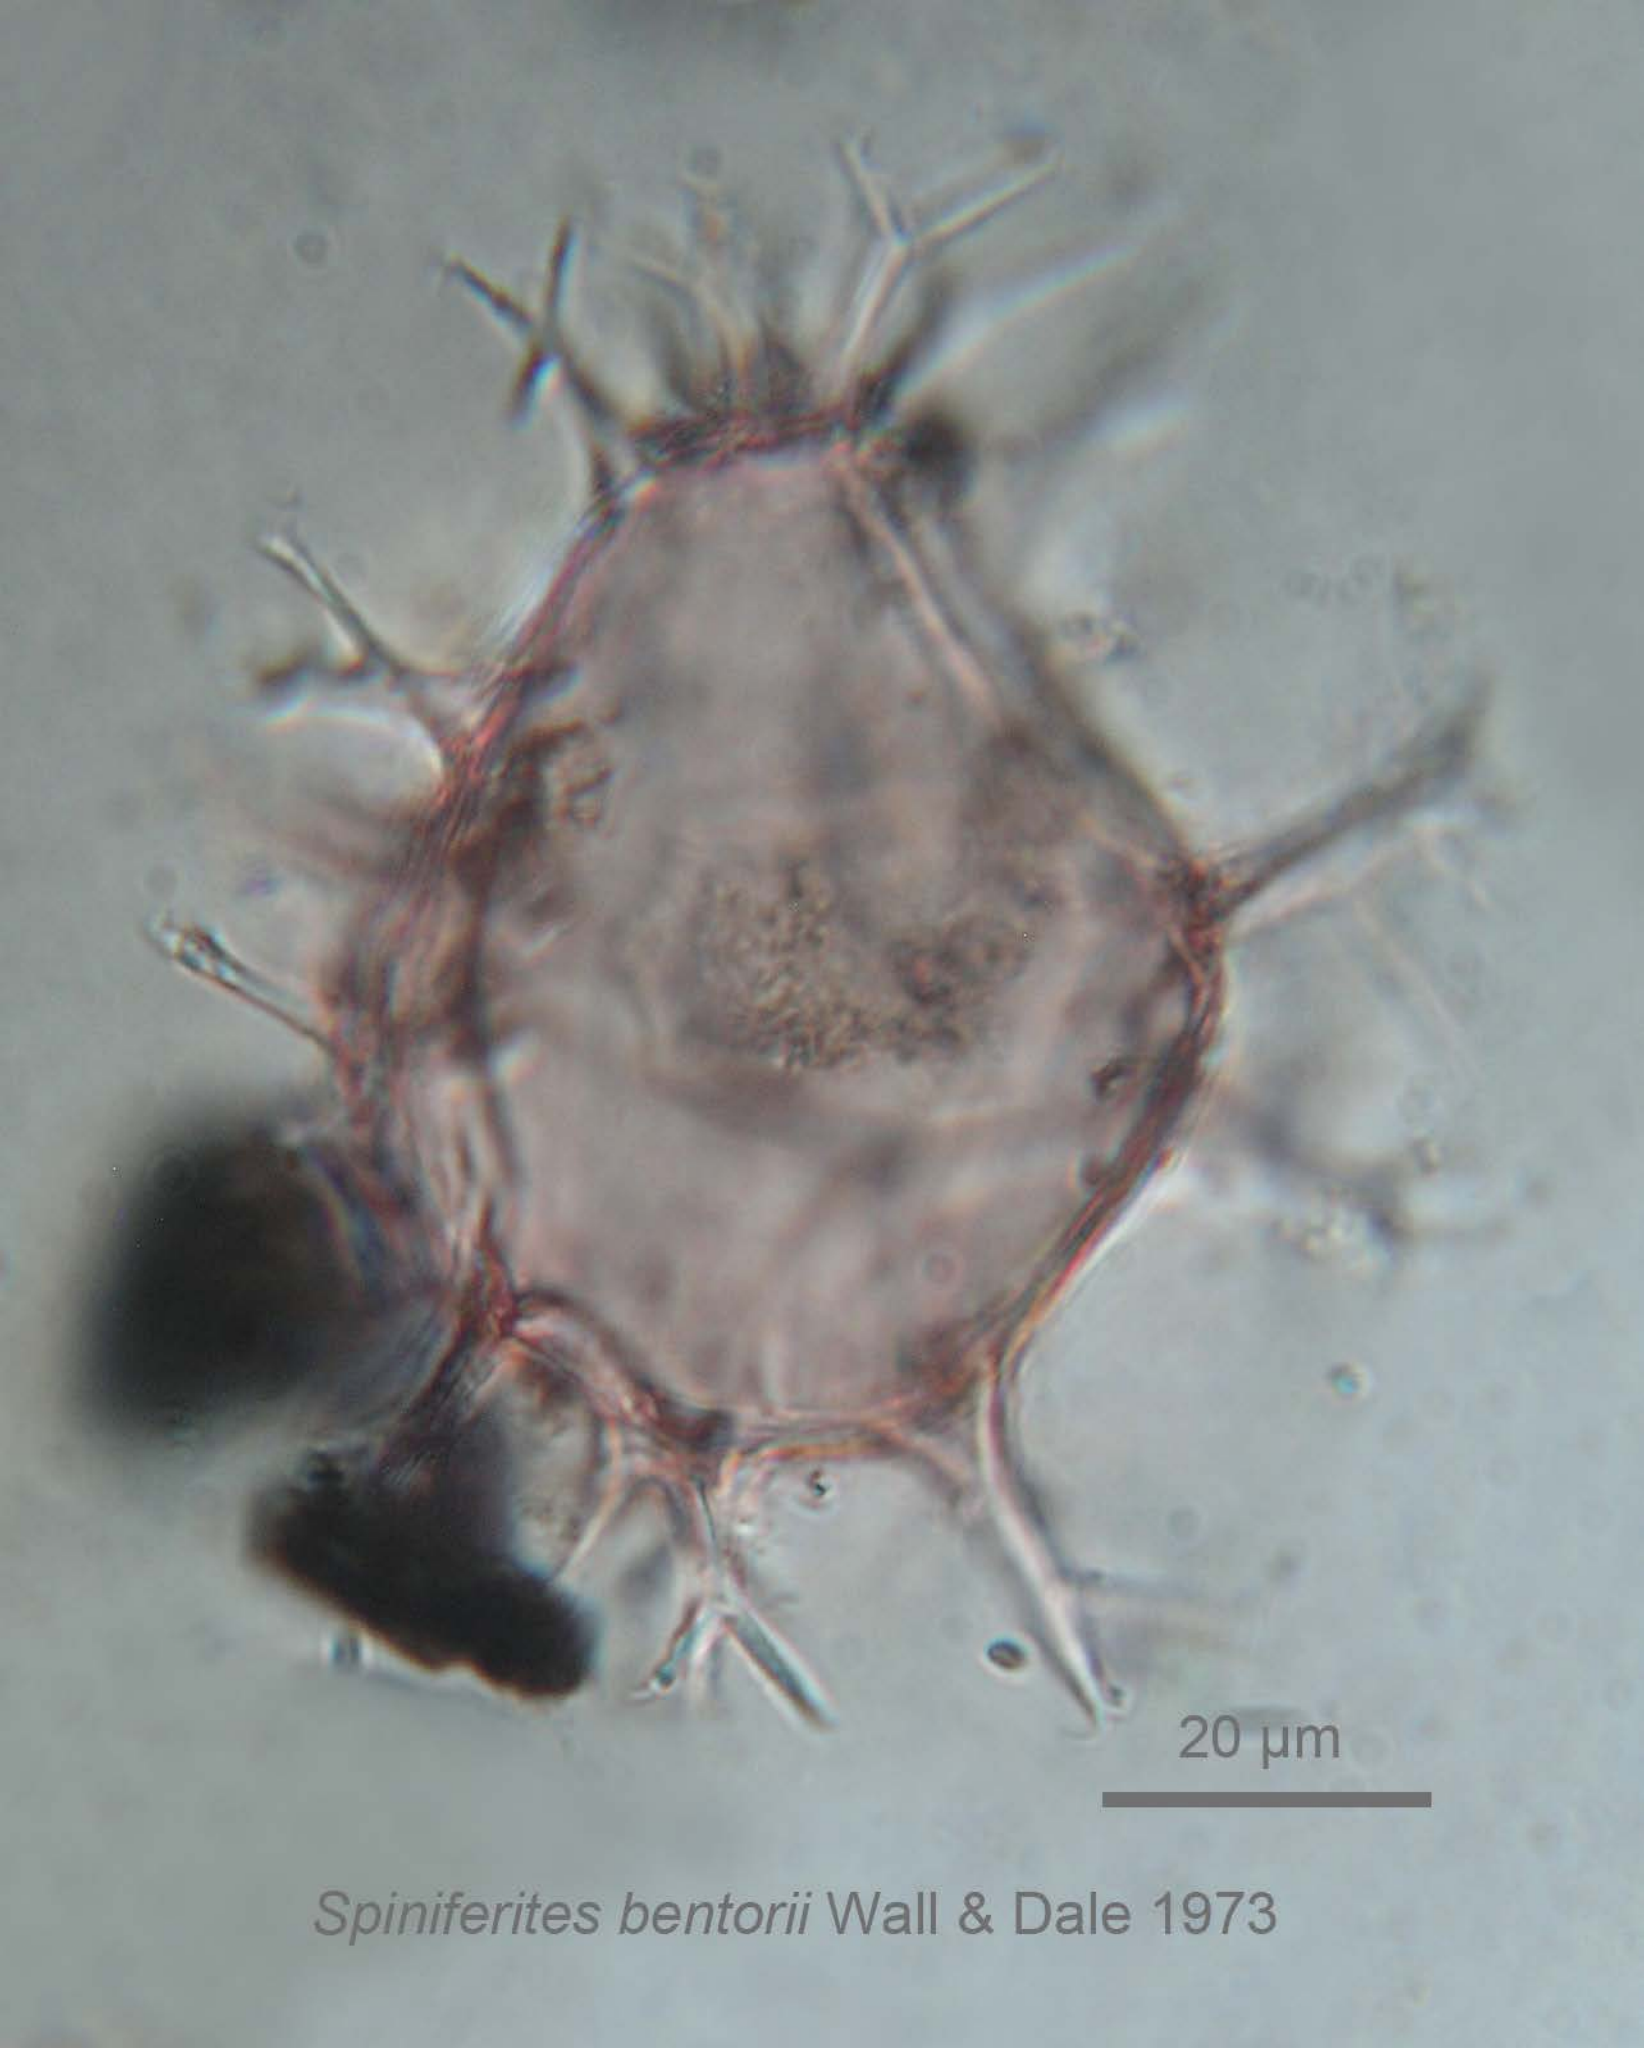

20  $\mu\text{m}$

*Spiniferites bentorii* Wall & Dale 1973



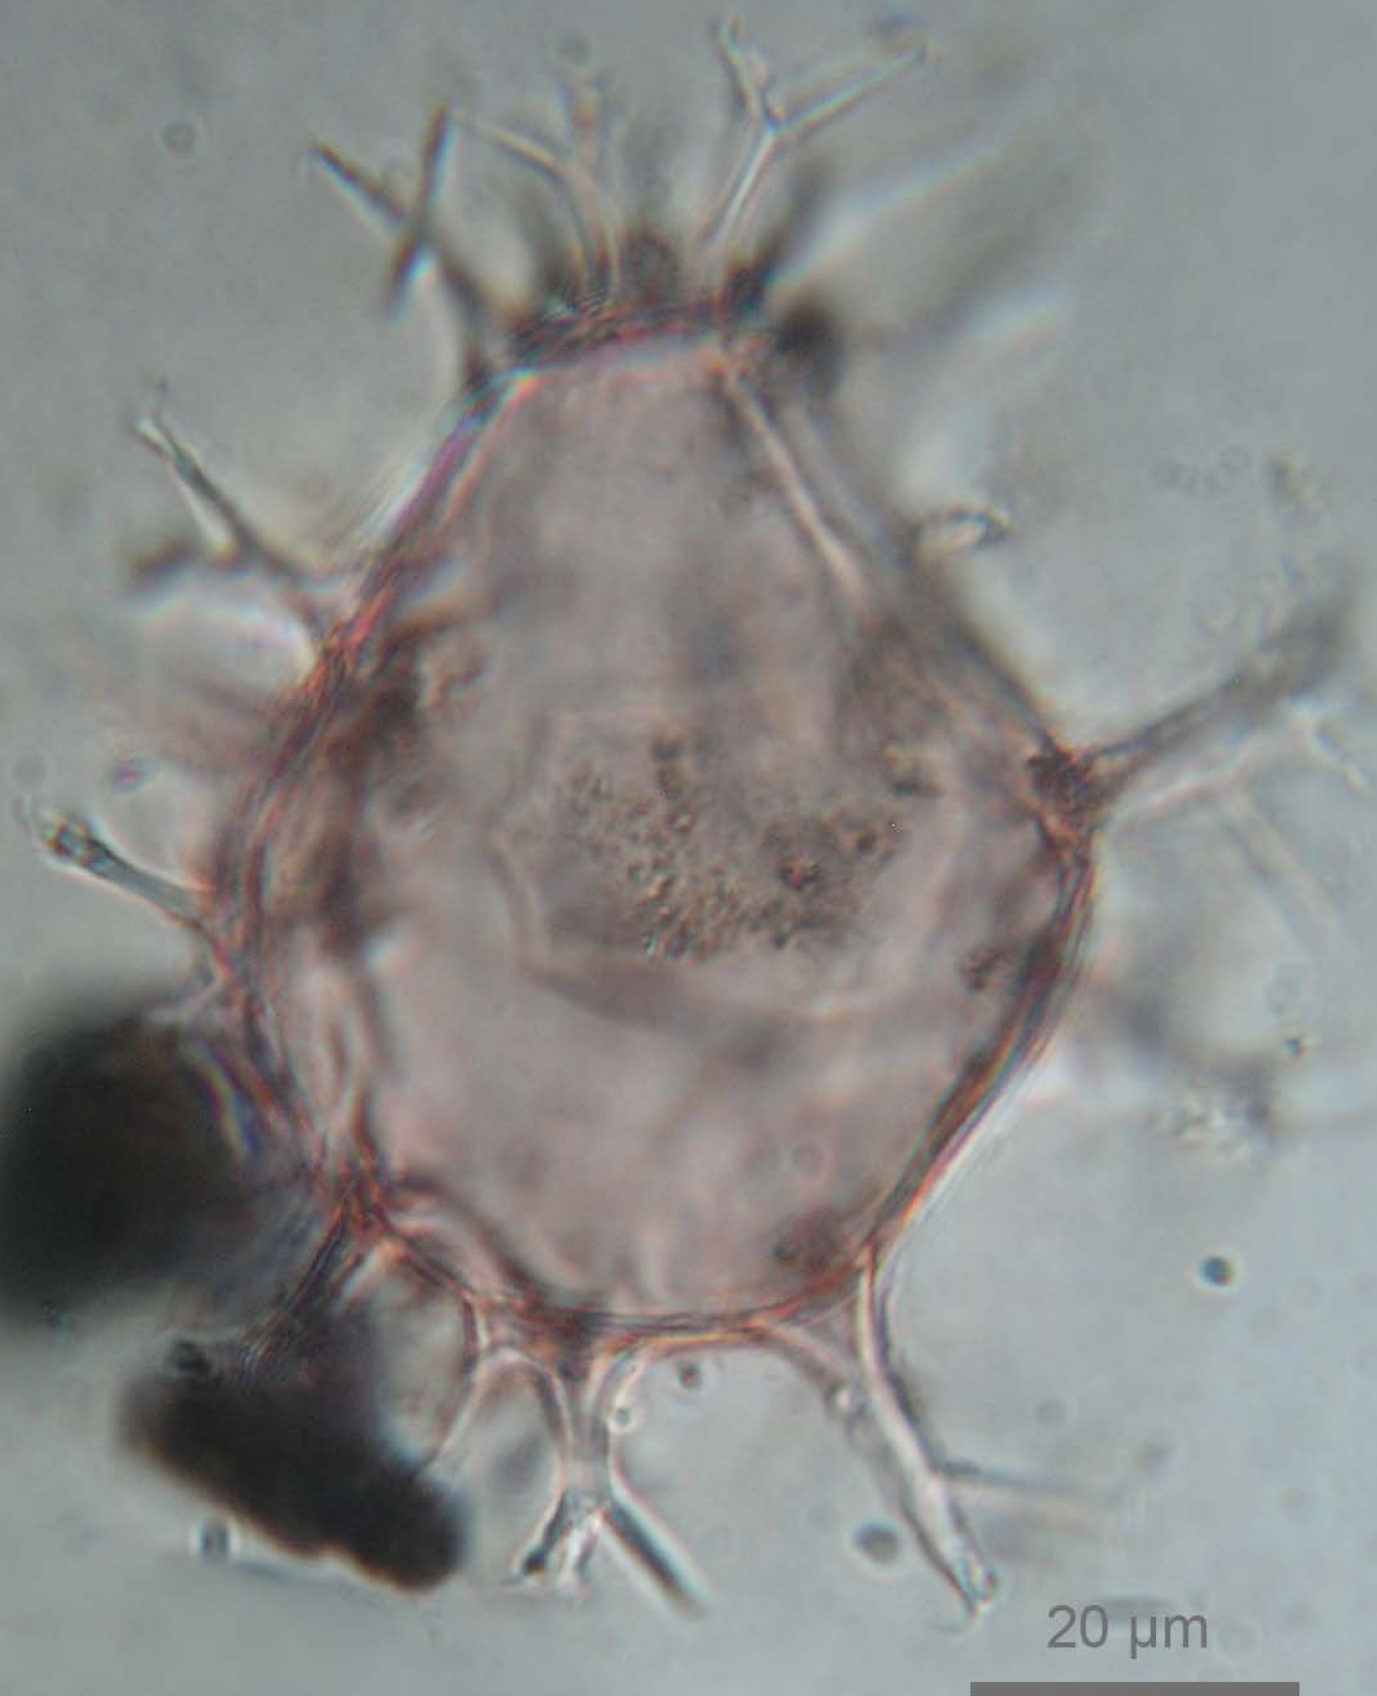

*Spiniferites bentorii* Wall & Dale 1973



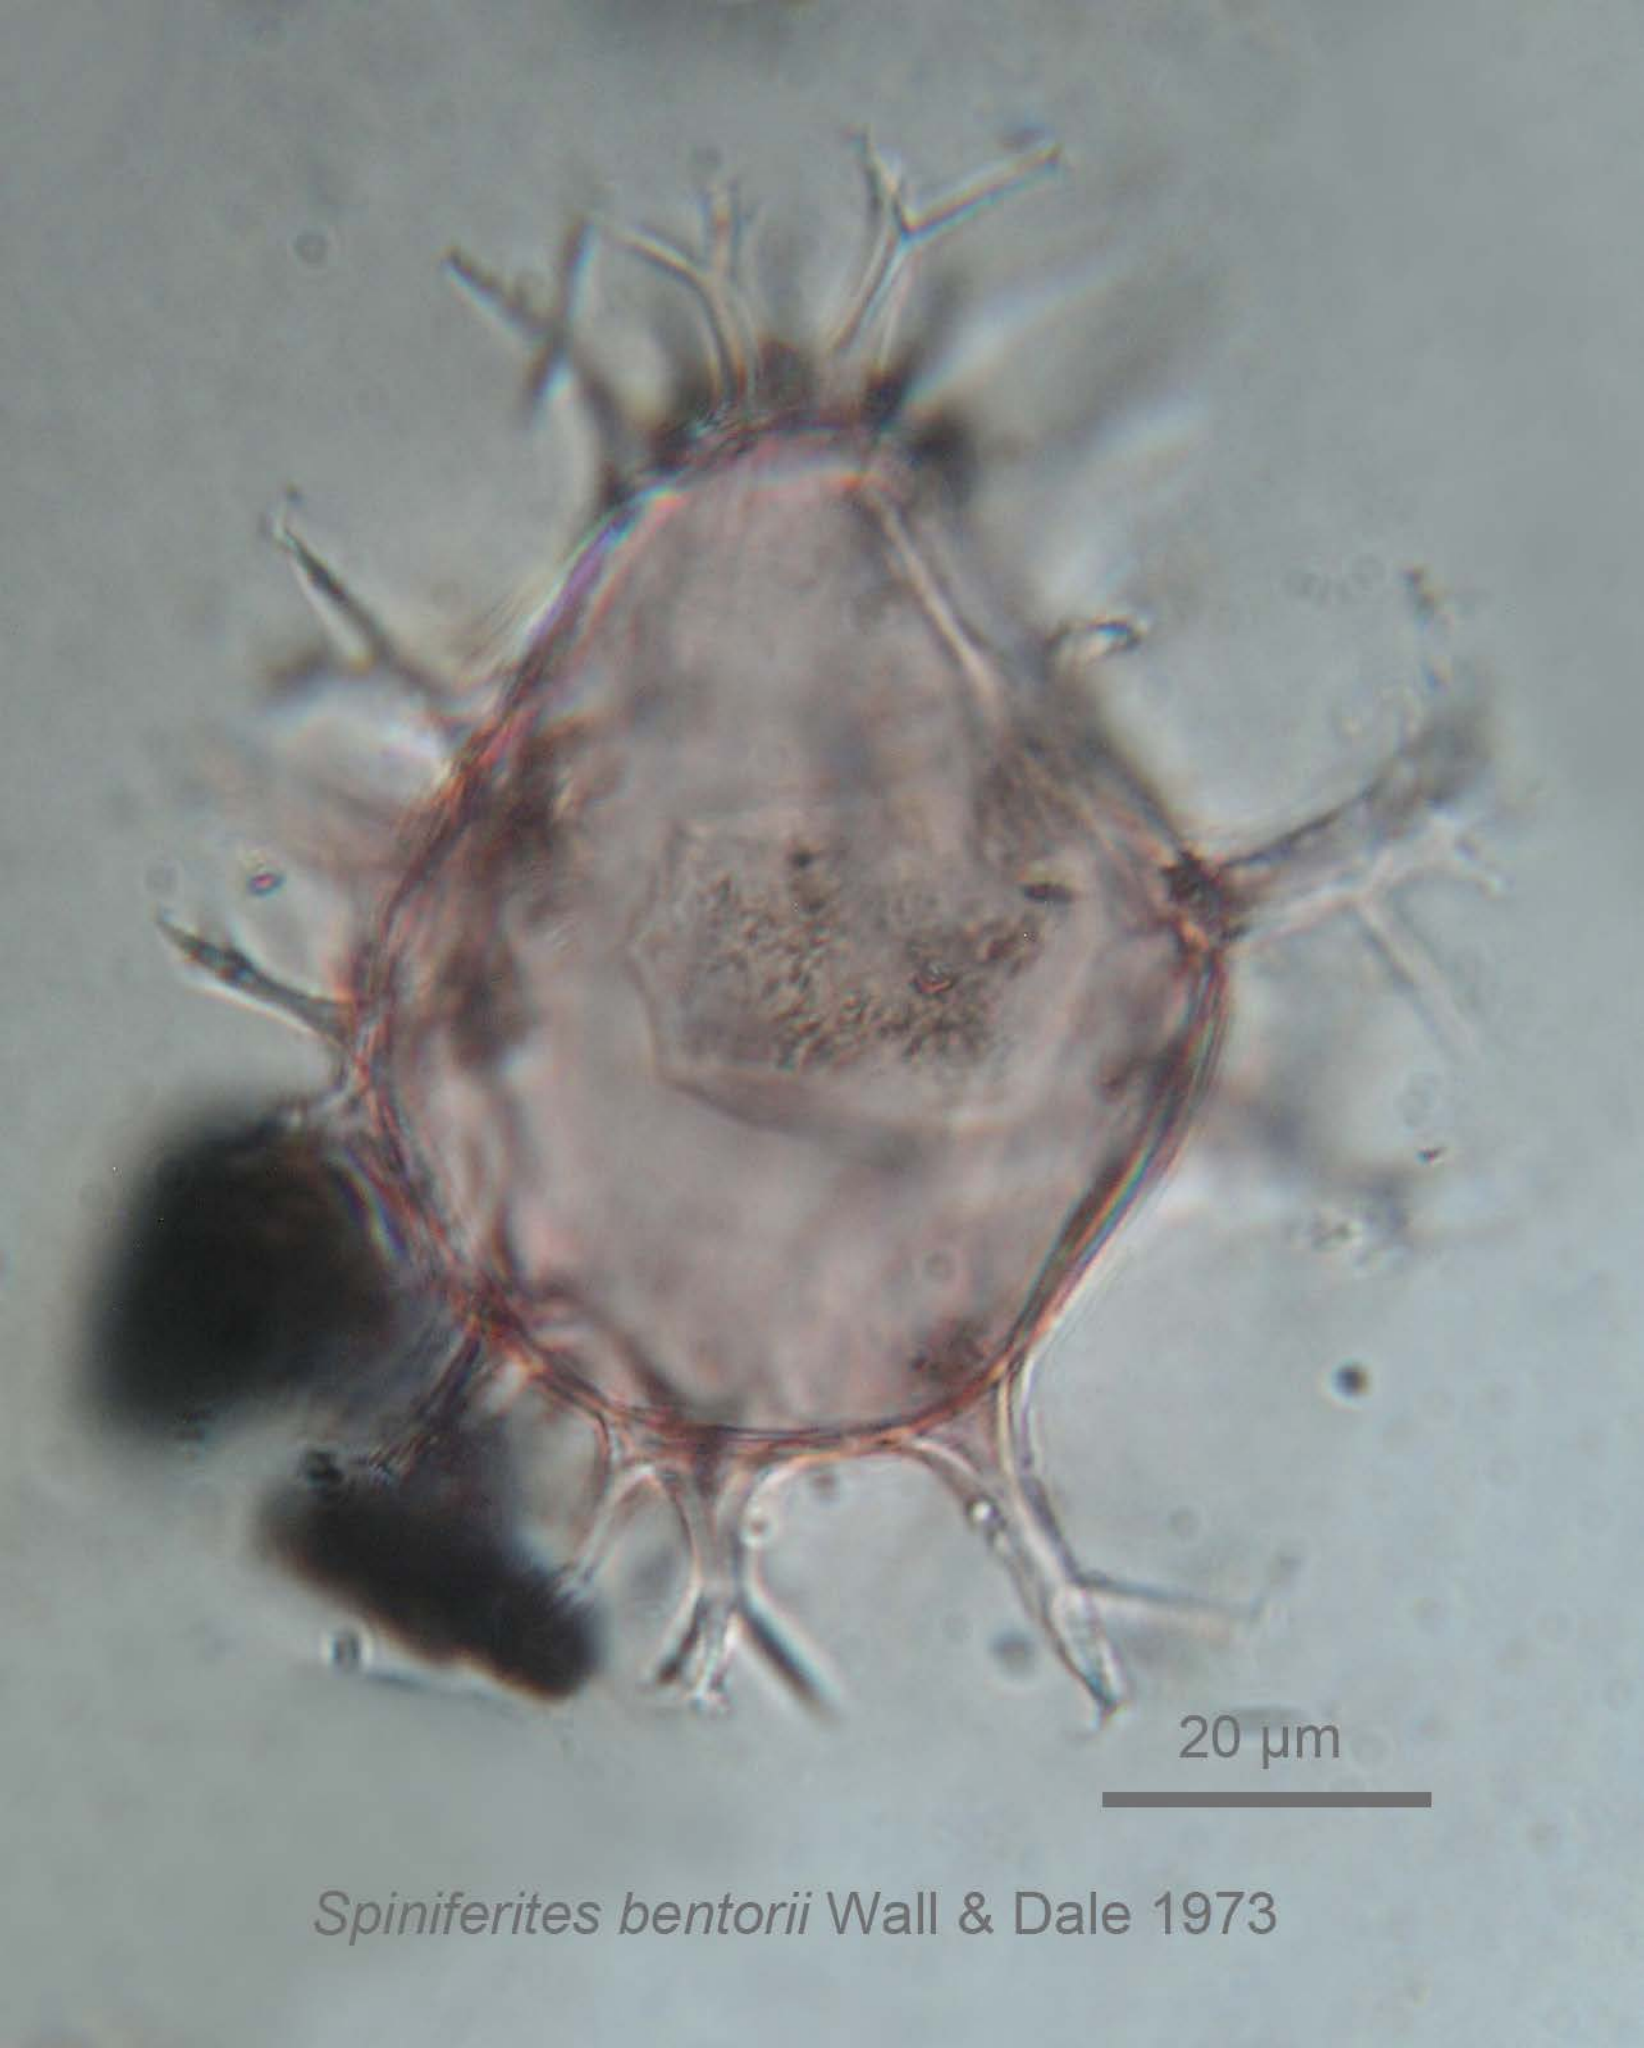

20  $\mu\text{m}$

*Spiniferites bentorii* Wall & Dale 1973

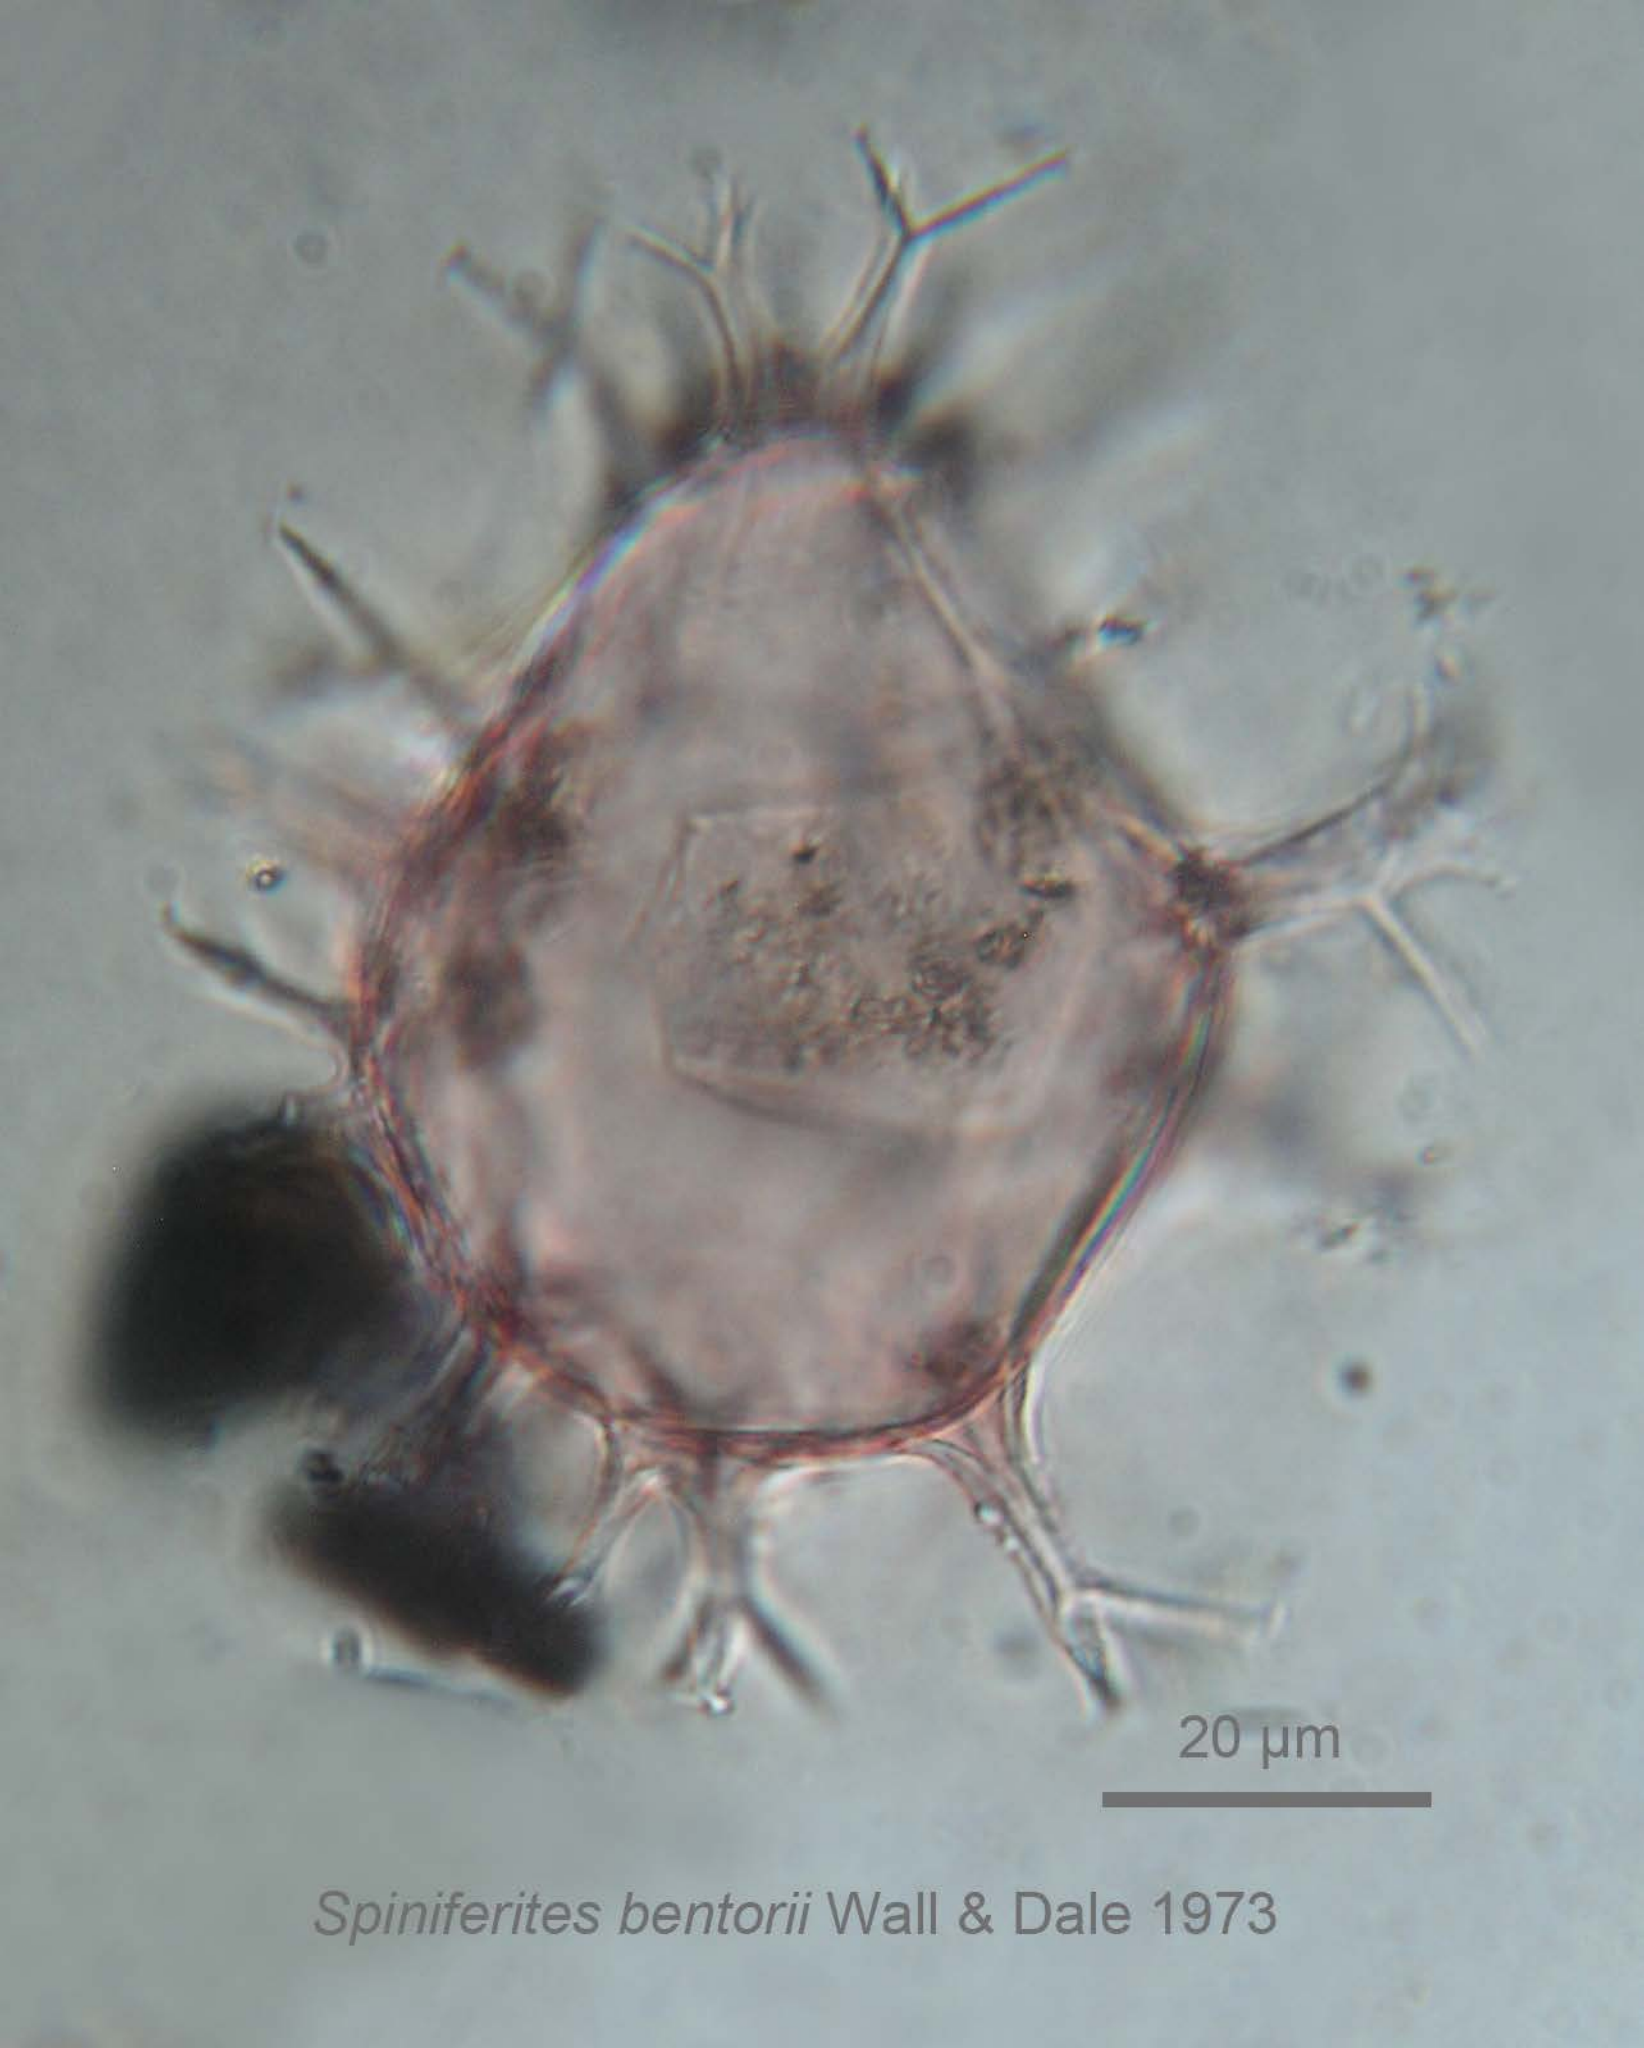

20  $\mu\text{m}$

*Spiniferites bentorii* Wall & Dale 1973



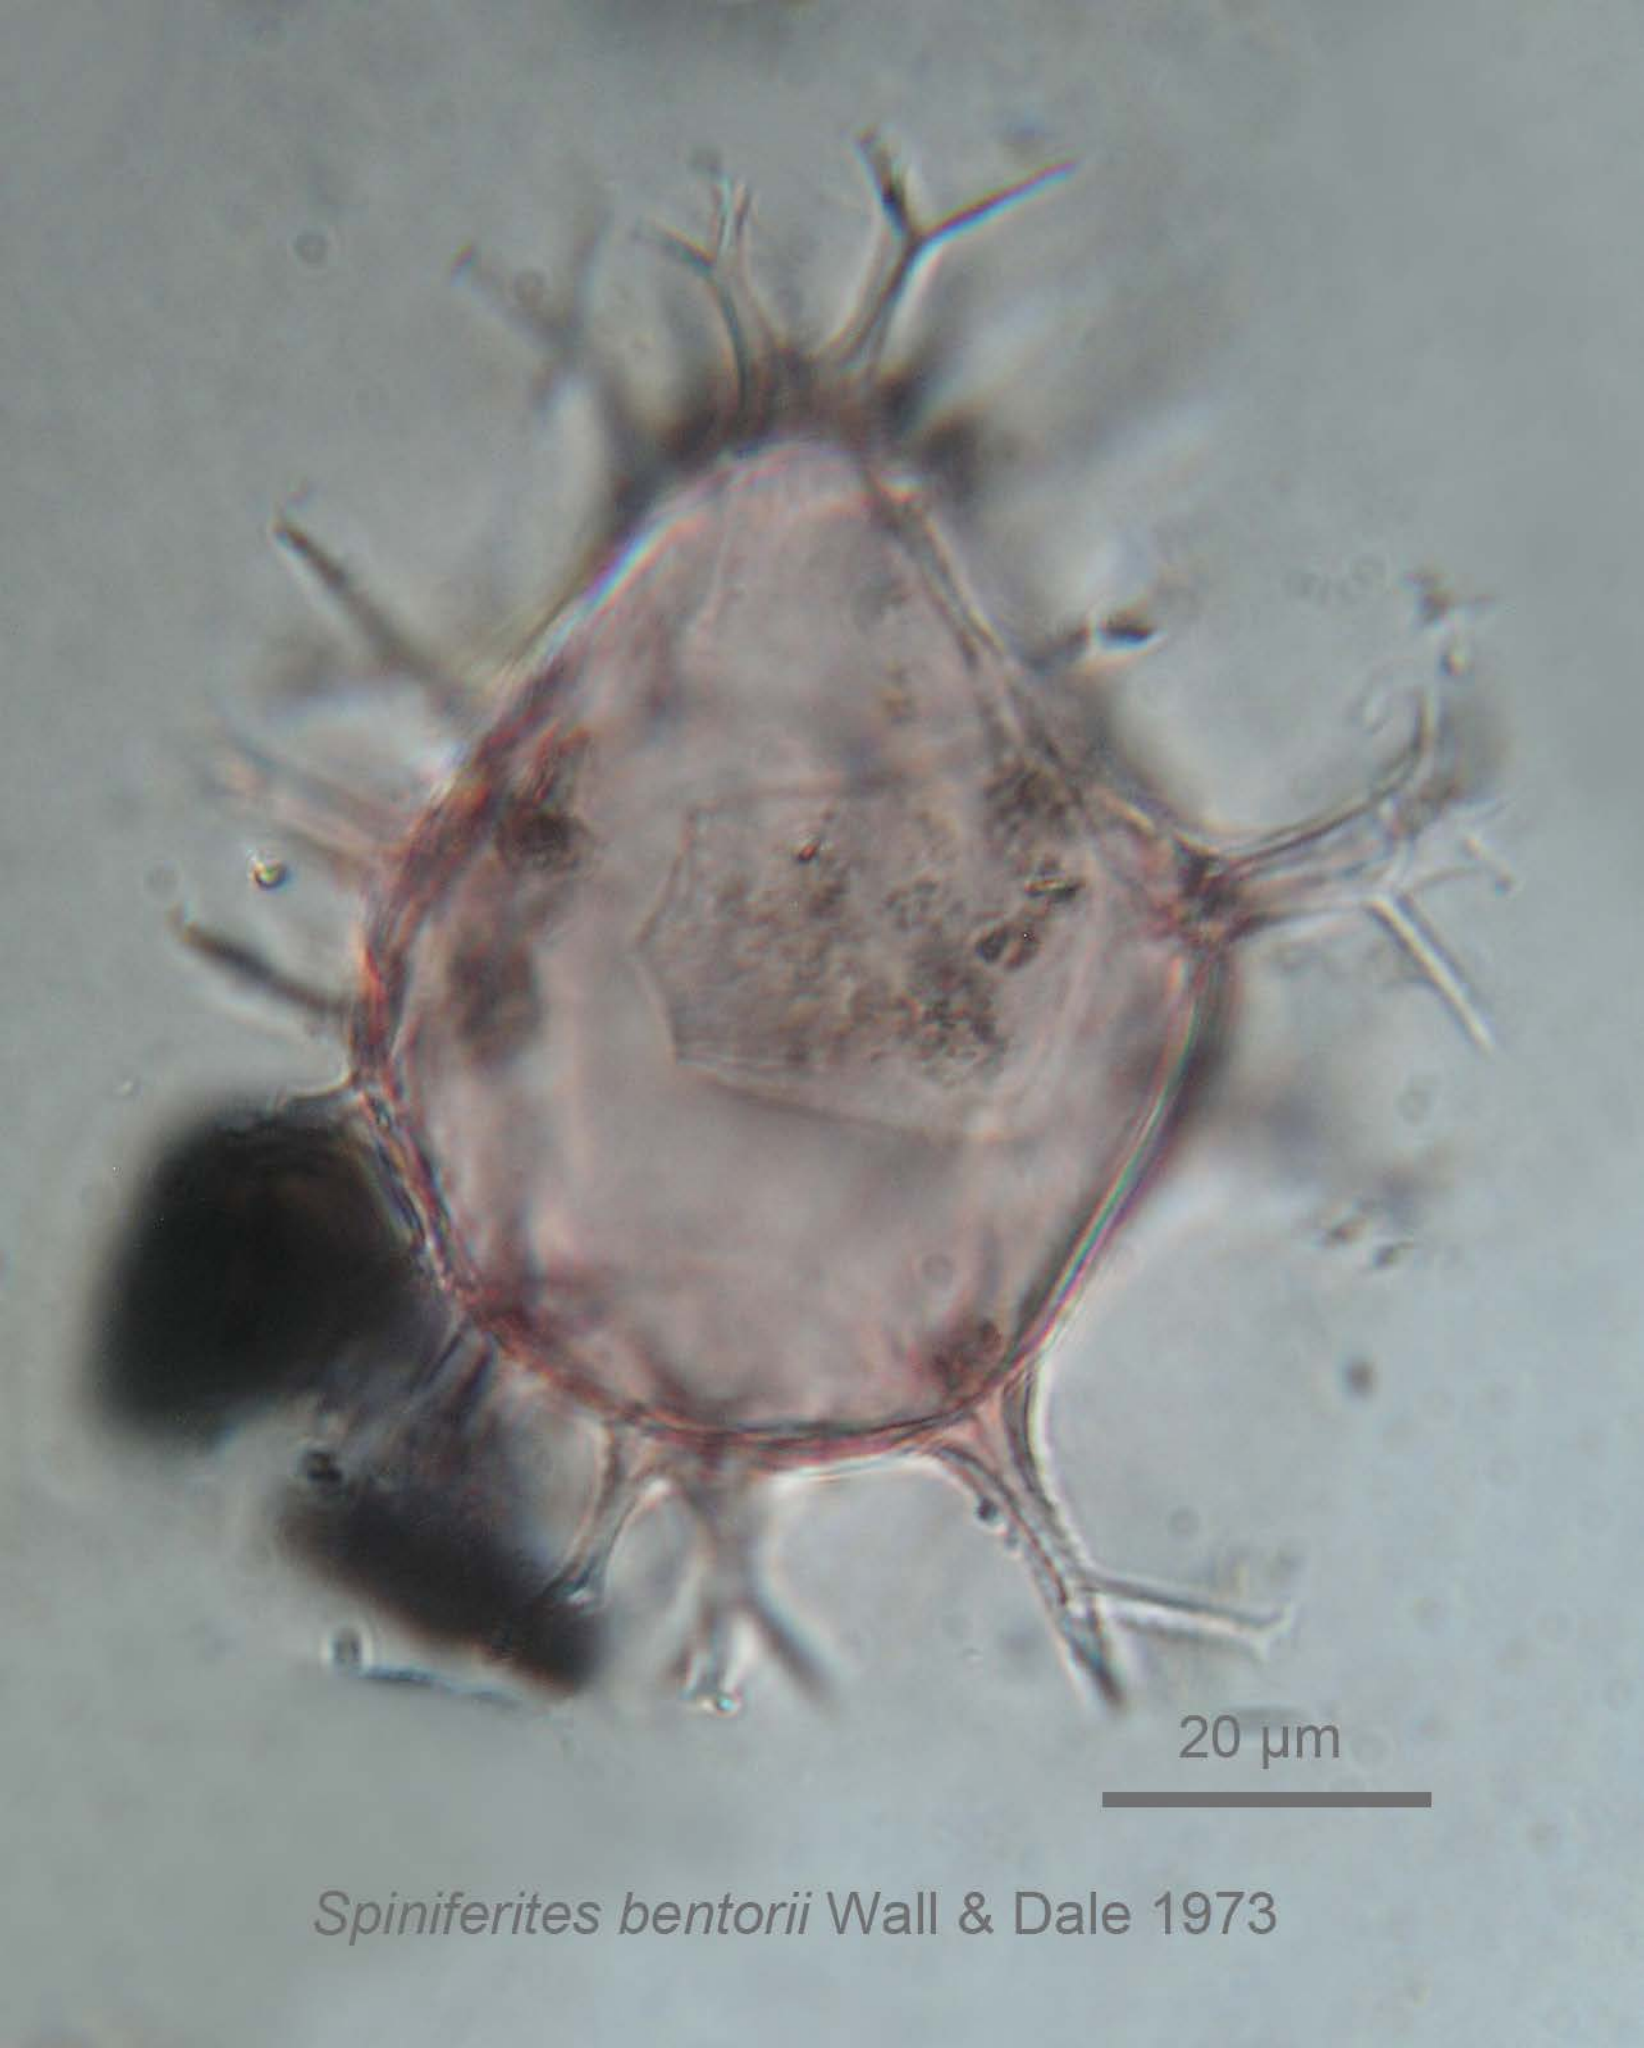

20 μm

*Spiniferites bentorii* Wall & Dale 1973



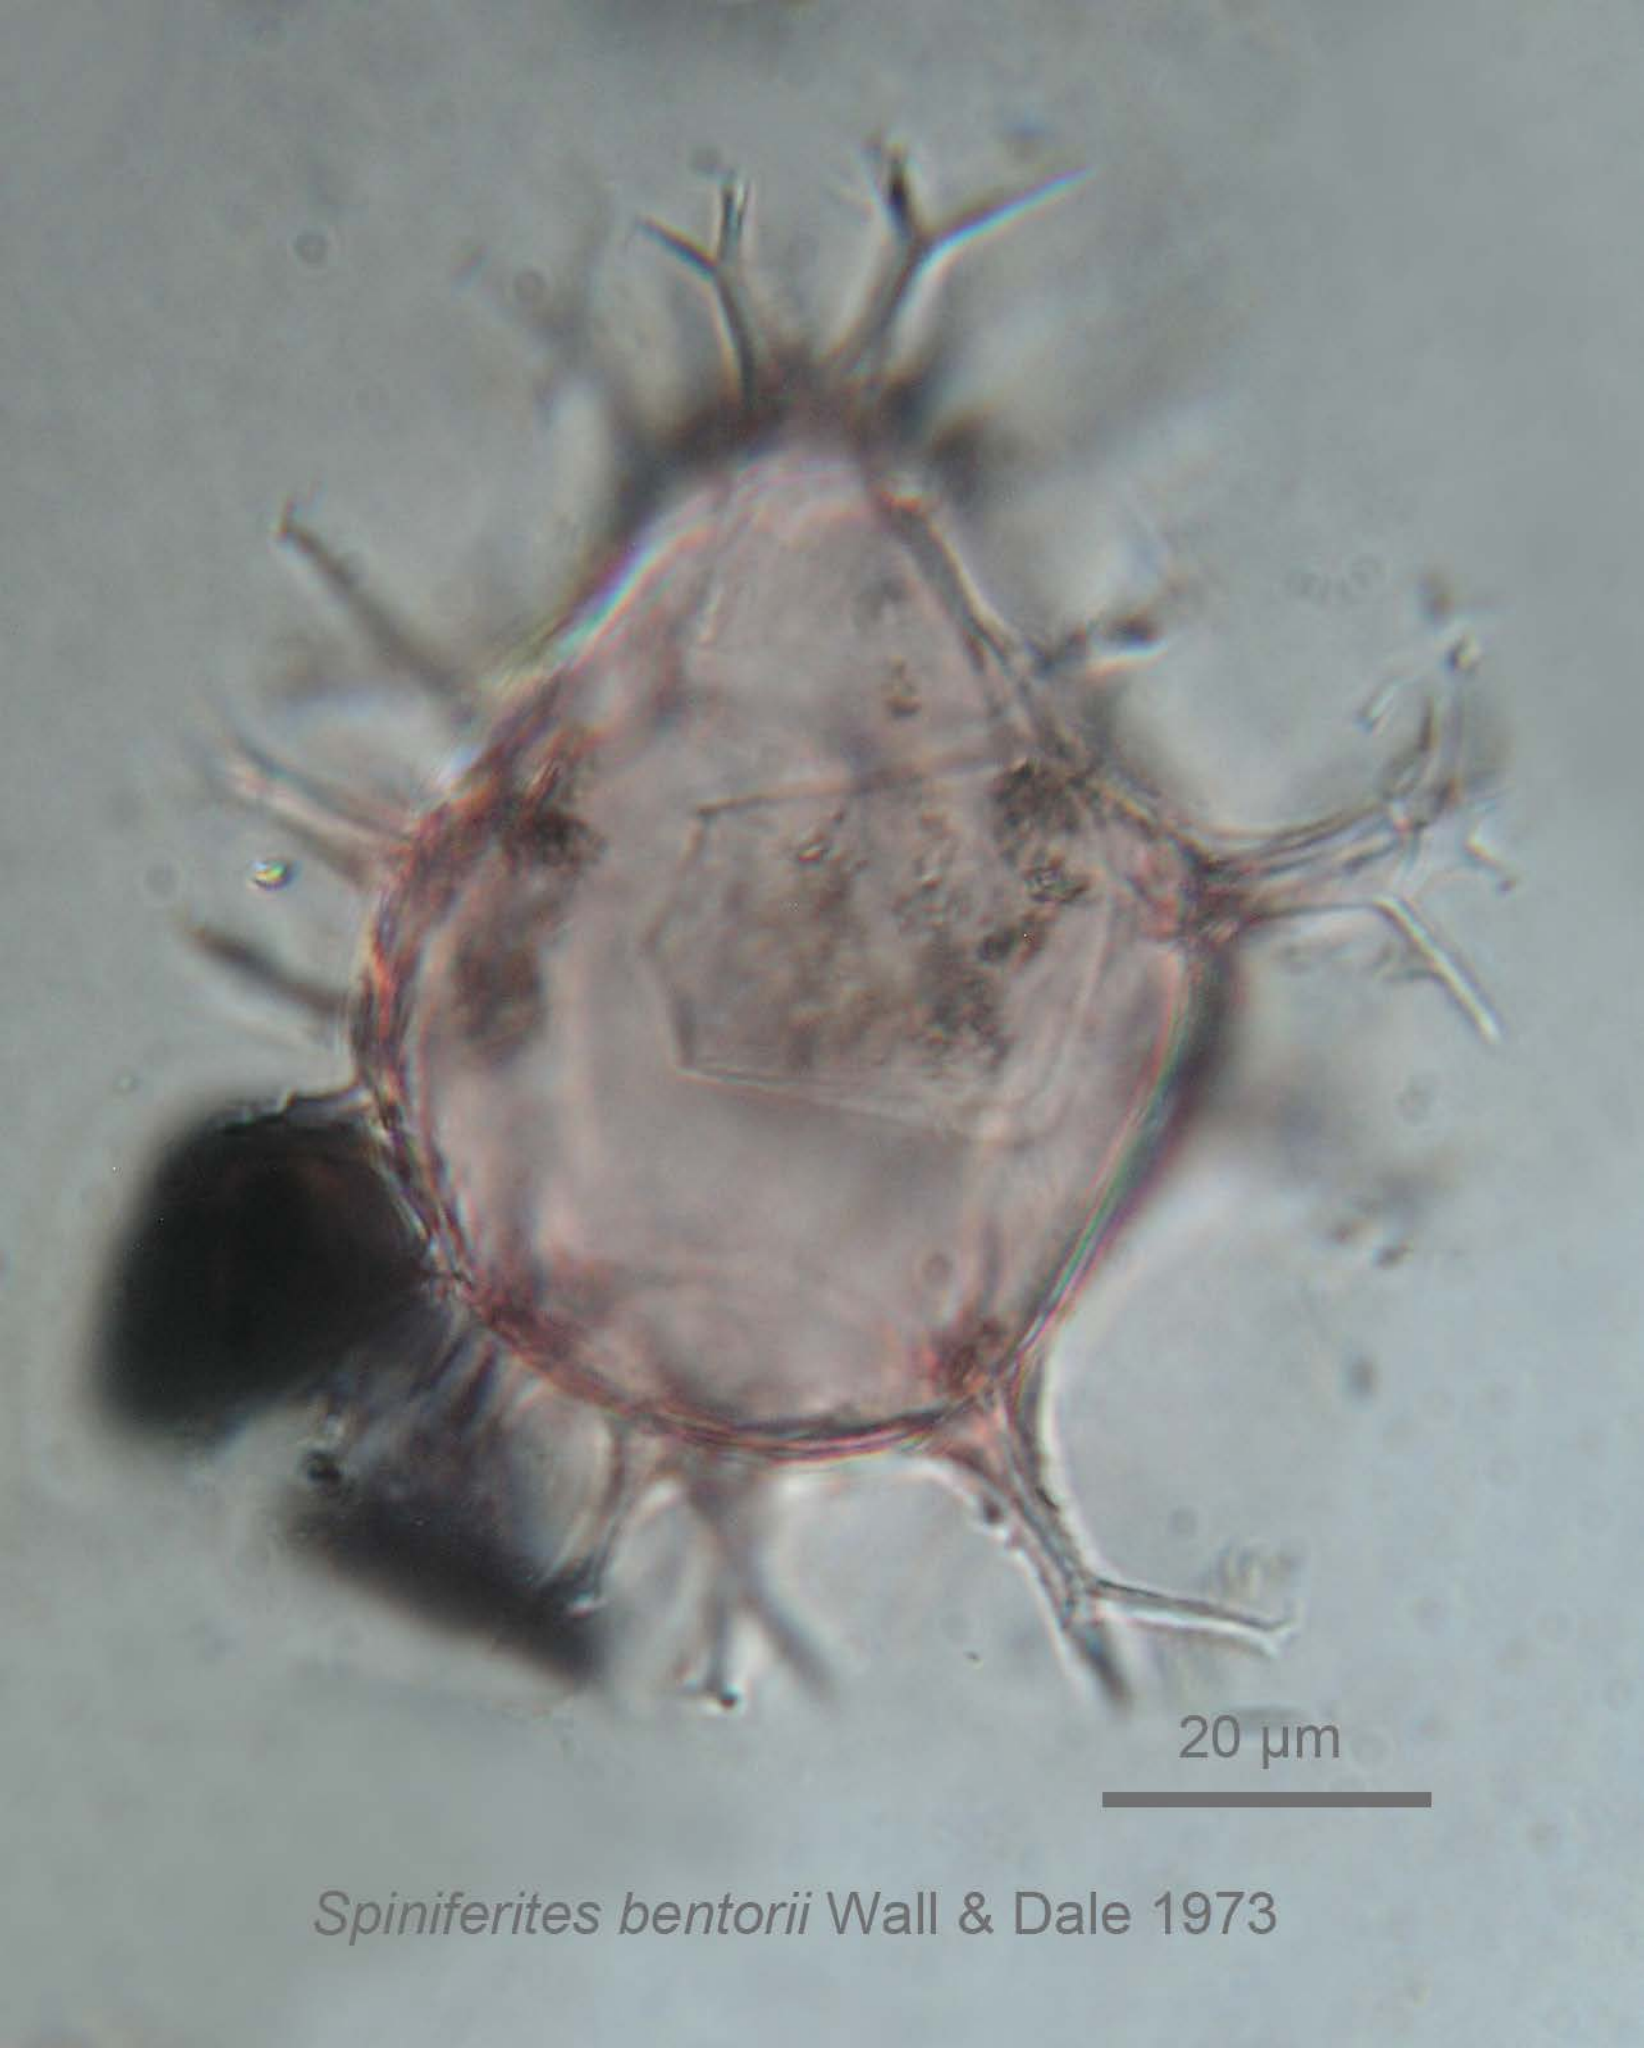

20  $\mu\text{m}$

*Spiniferites bentorii* Wall & Dale 1973

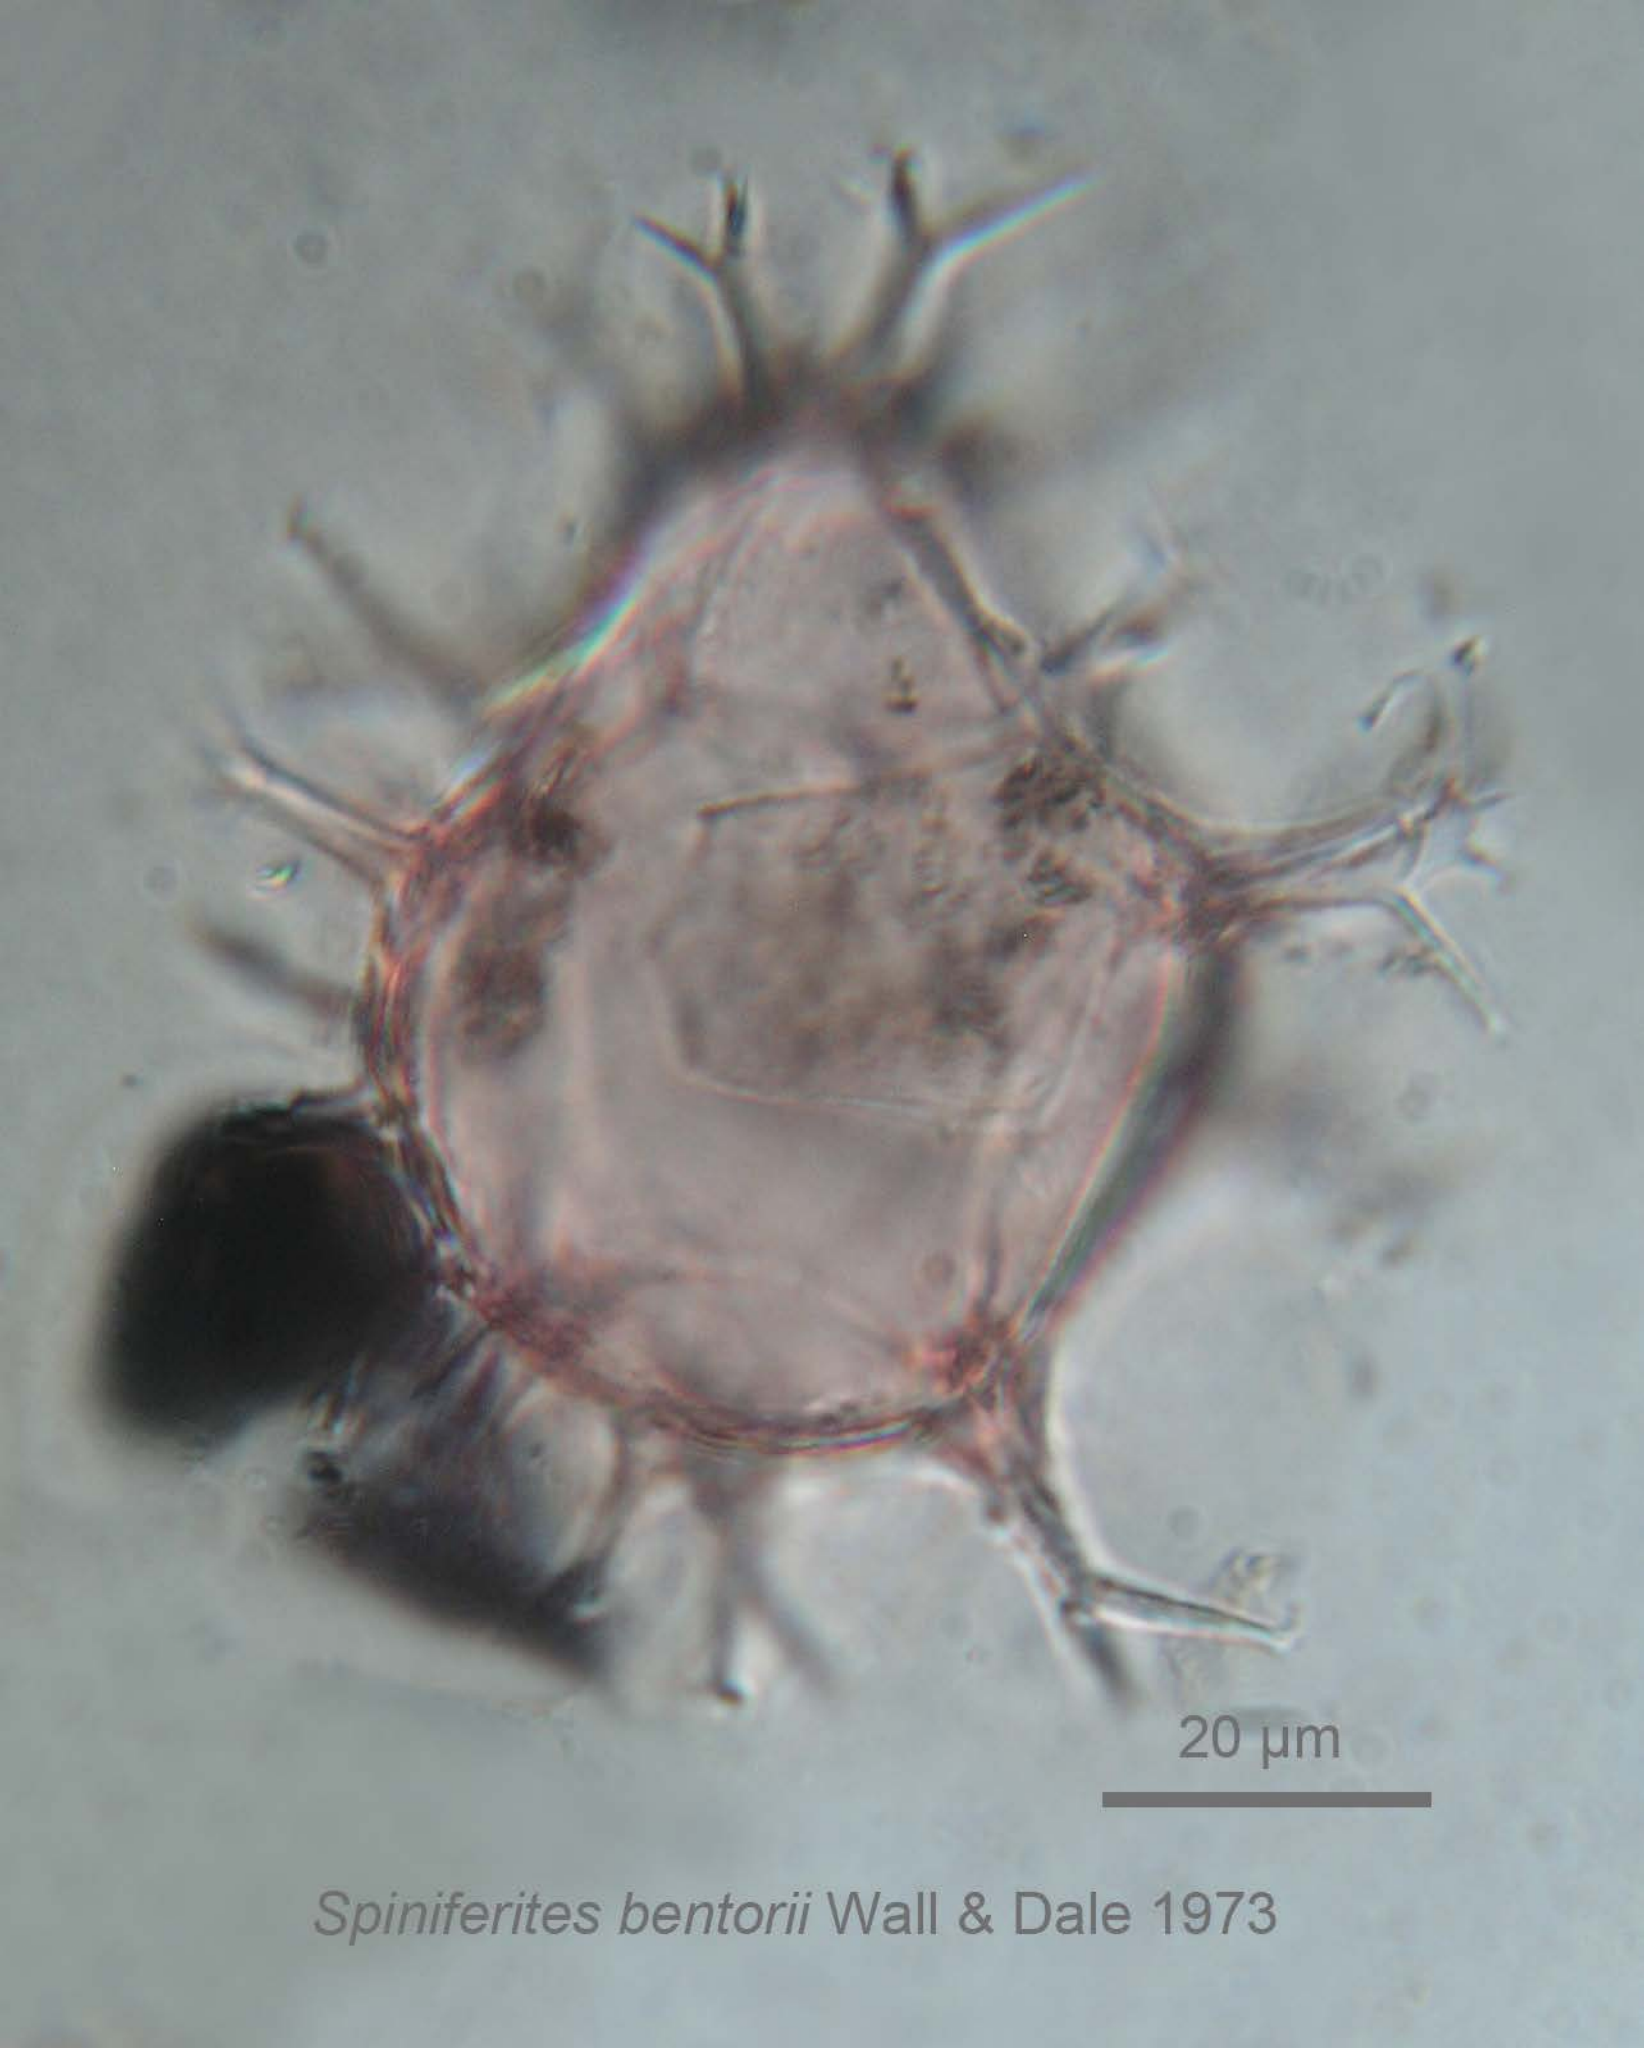

20  $\mu\text{m}$

*Spiniferites bentorii* Wall & Dale 1973

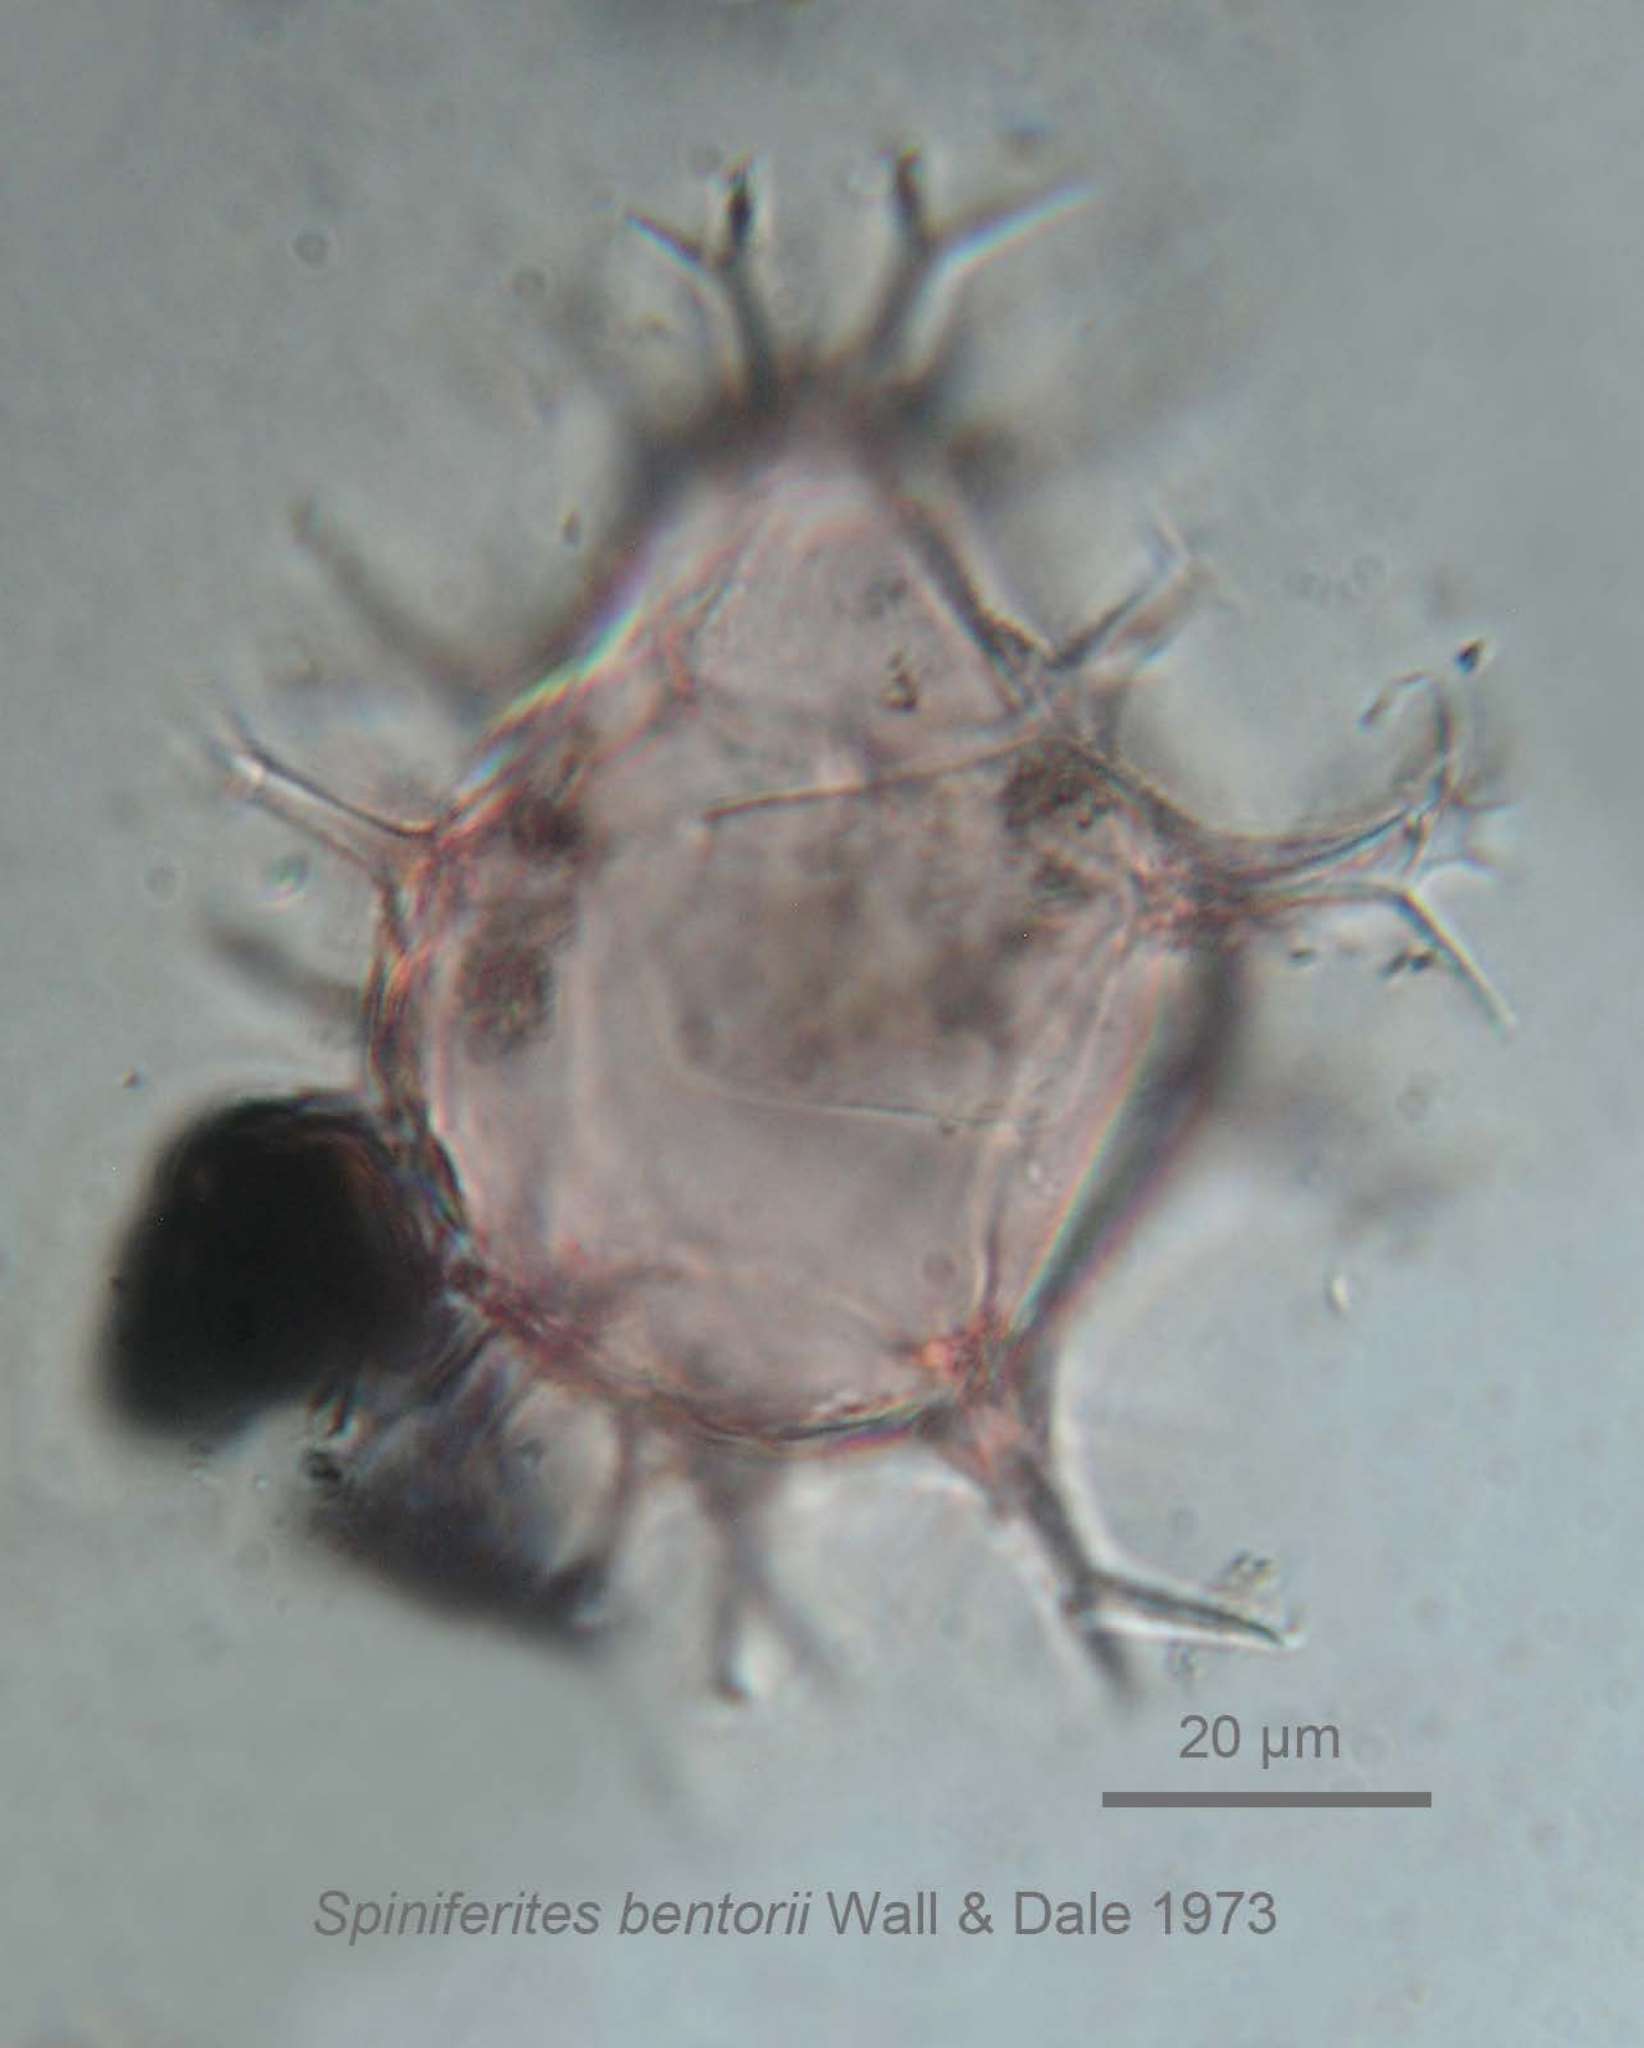

*Spiniferites bentorii* Wall & Dale 1973



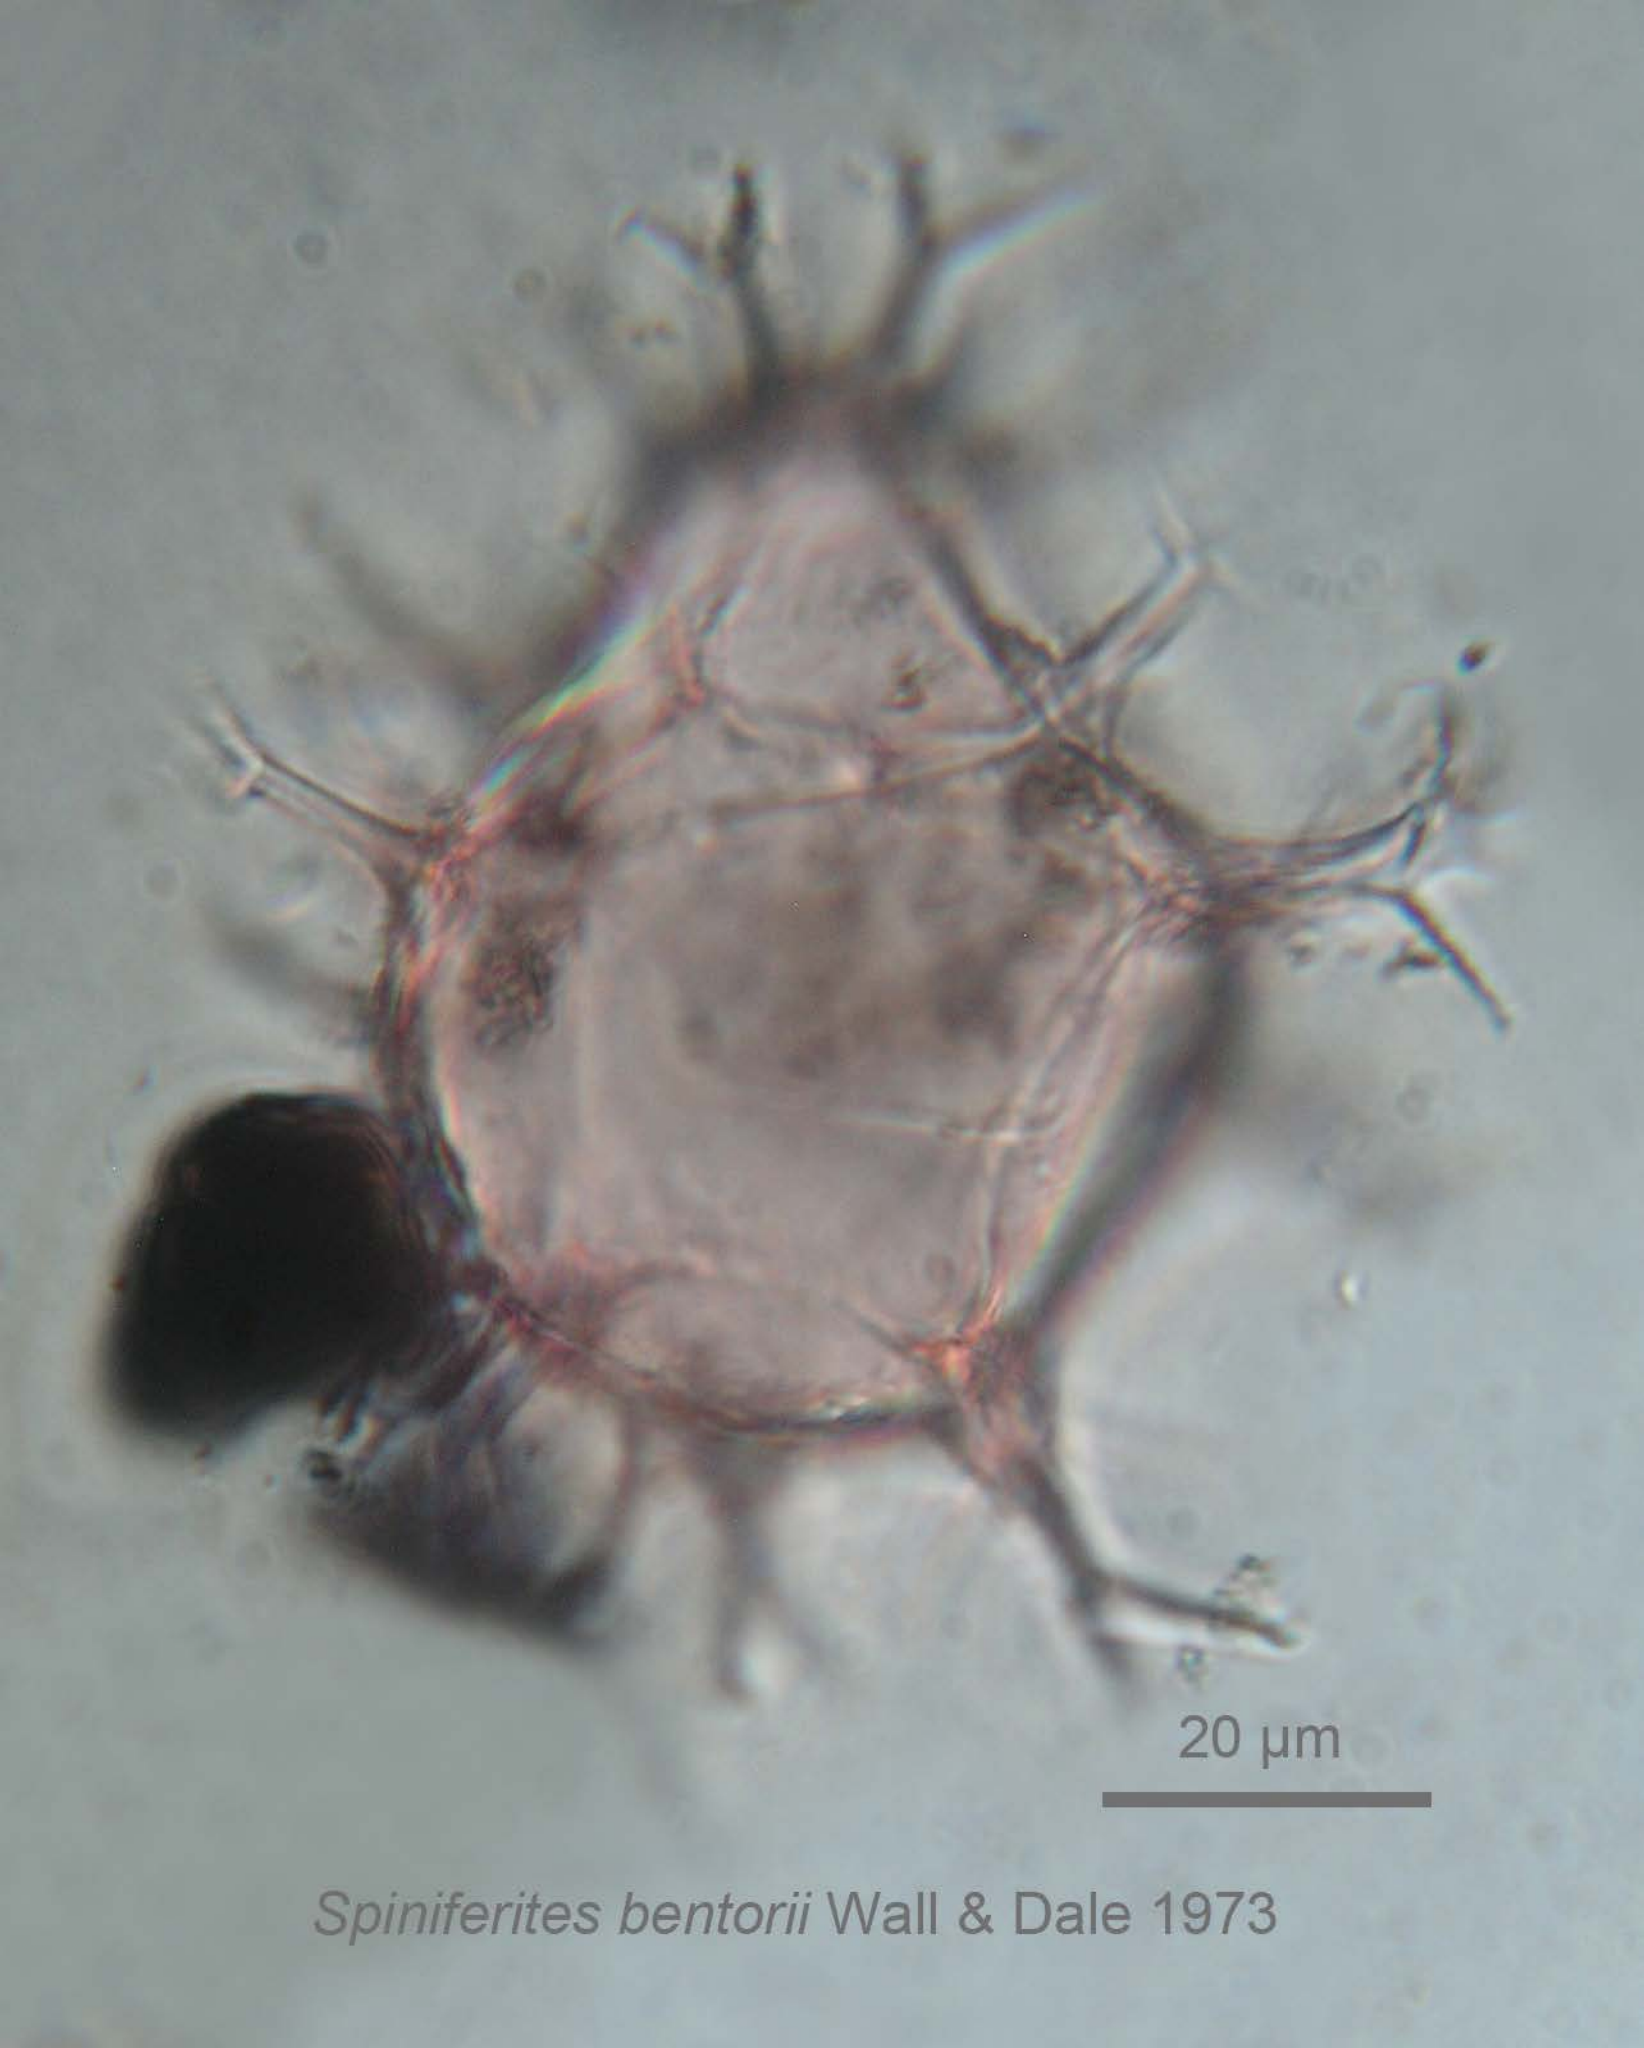

20 μm

*Spiniferites bentorii* Wall & Dale 1973

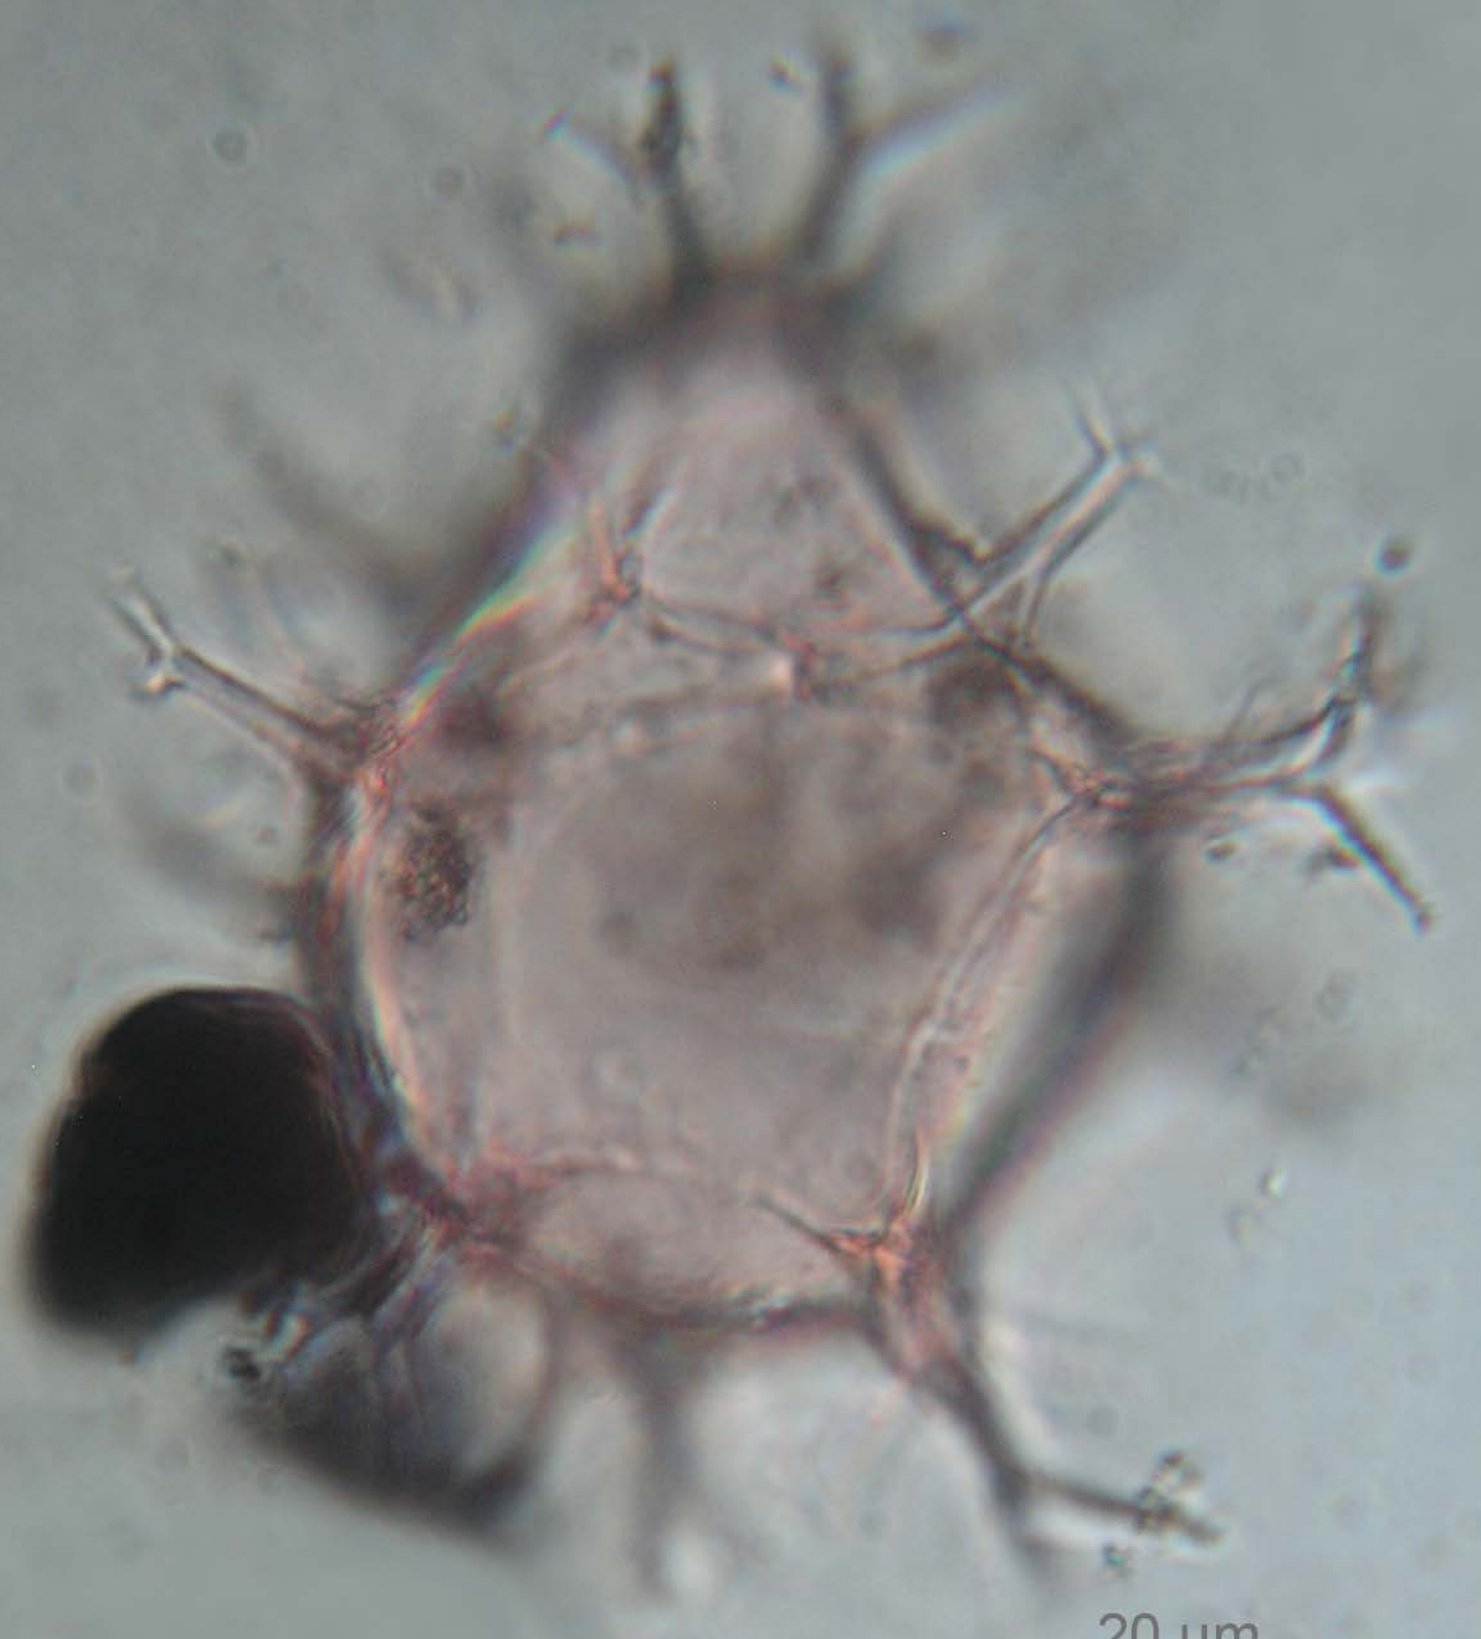

20  $\mu$ m

*Spiniferites bentorii* Wall & Dale 1973

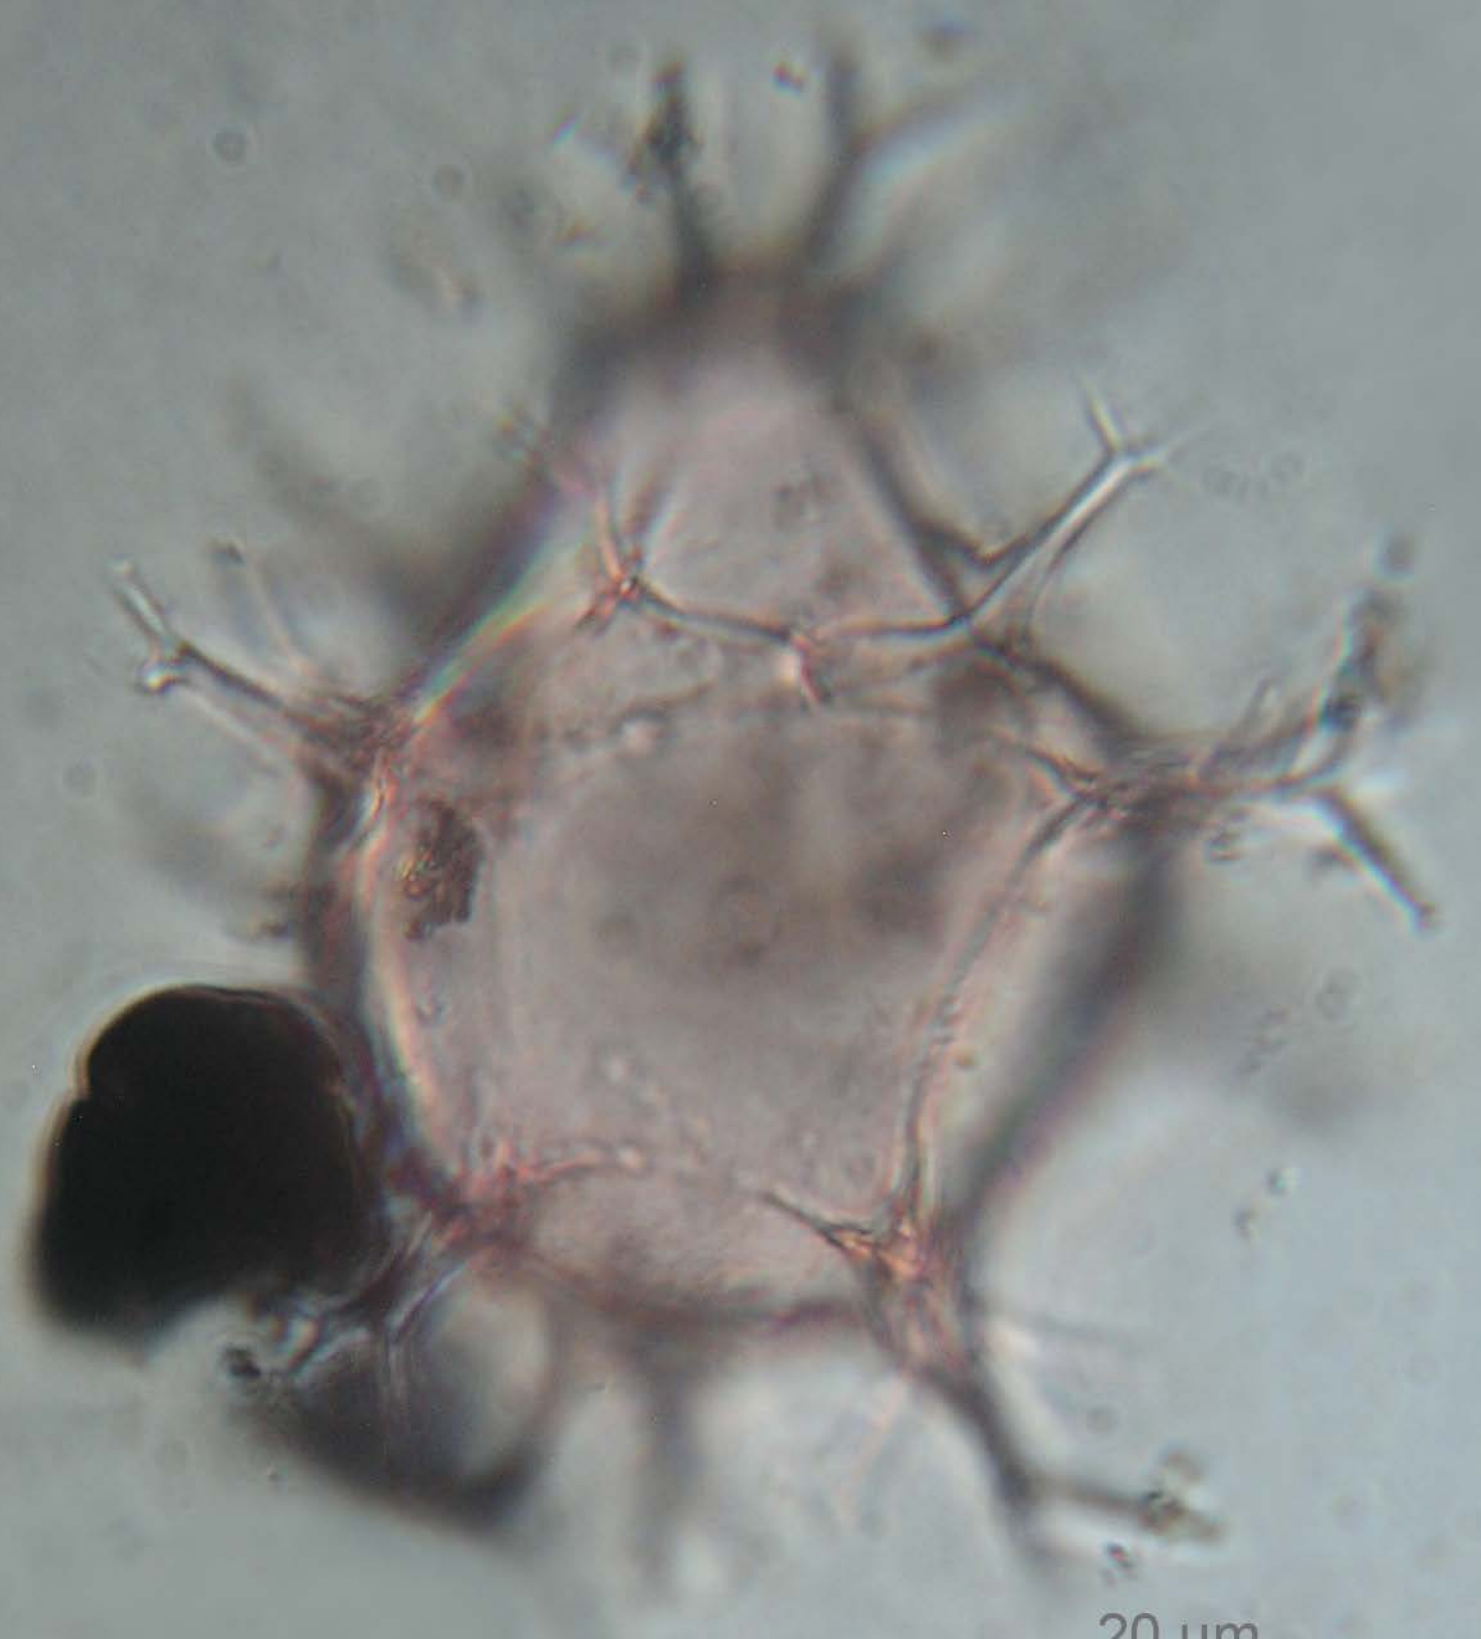

20  $\mu\text{m}$

*Spiniferites bentorii* Wall & Dale 1973



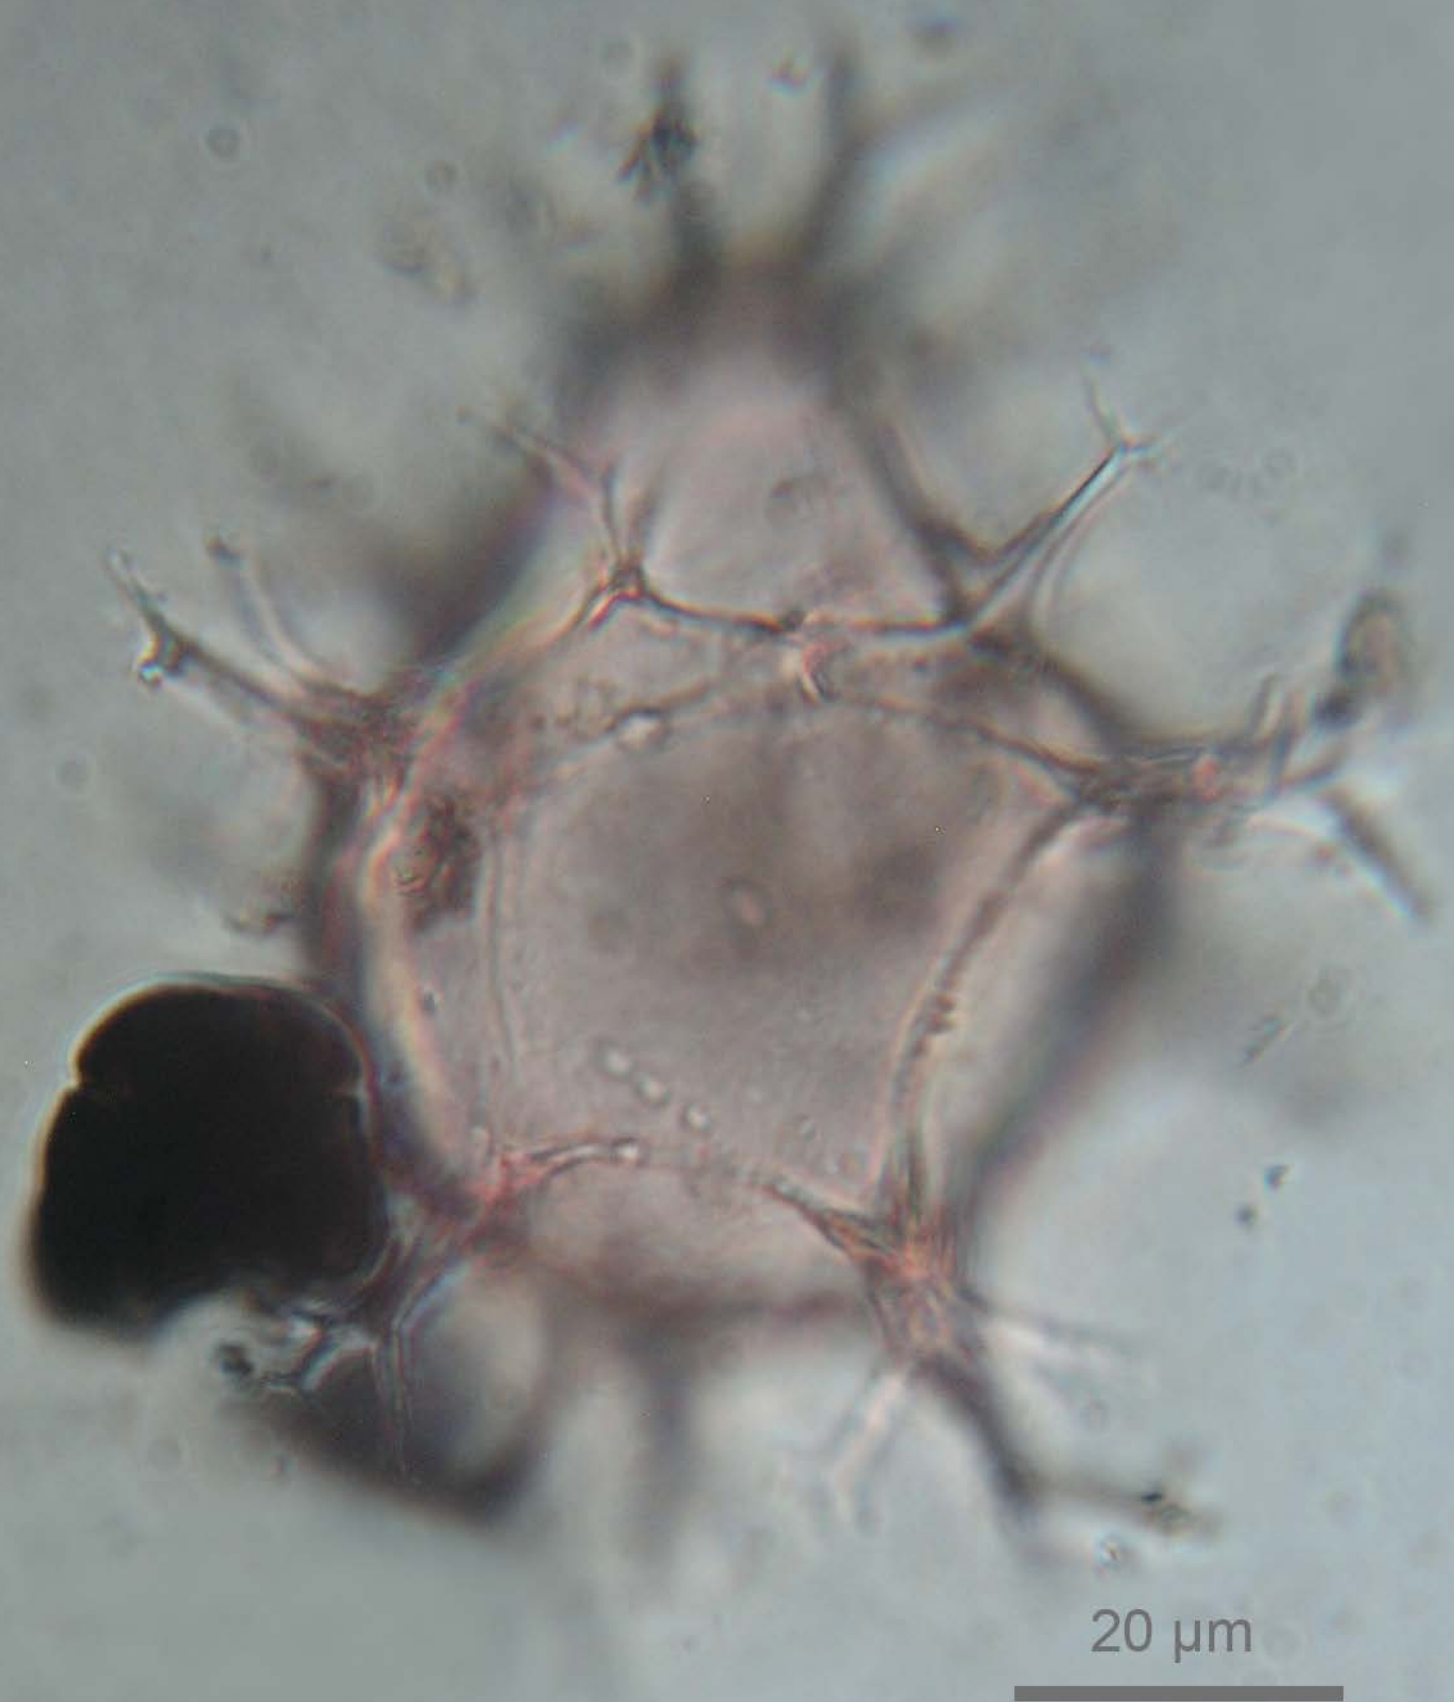

20  $\mu\text{m}$

*Spiniferites bentorii* Wall & Dale 1973

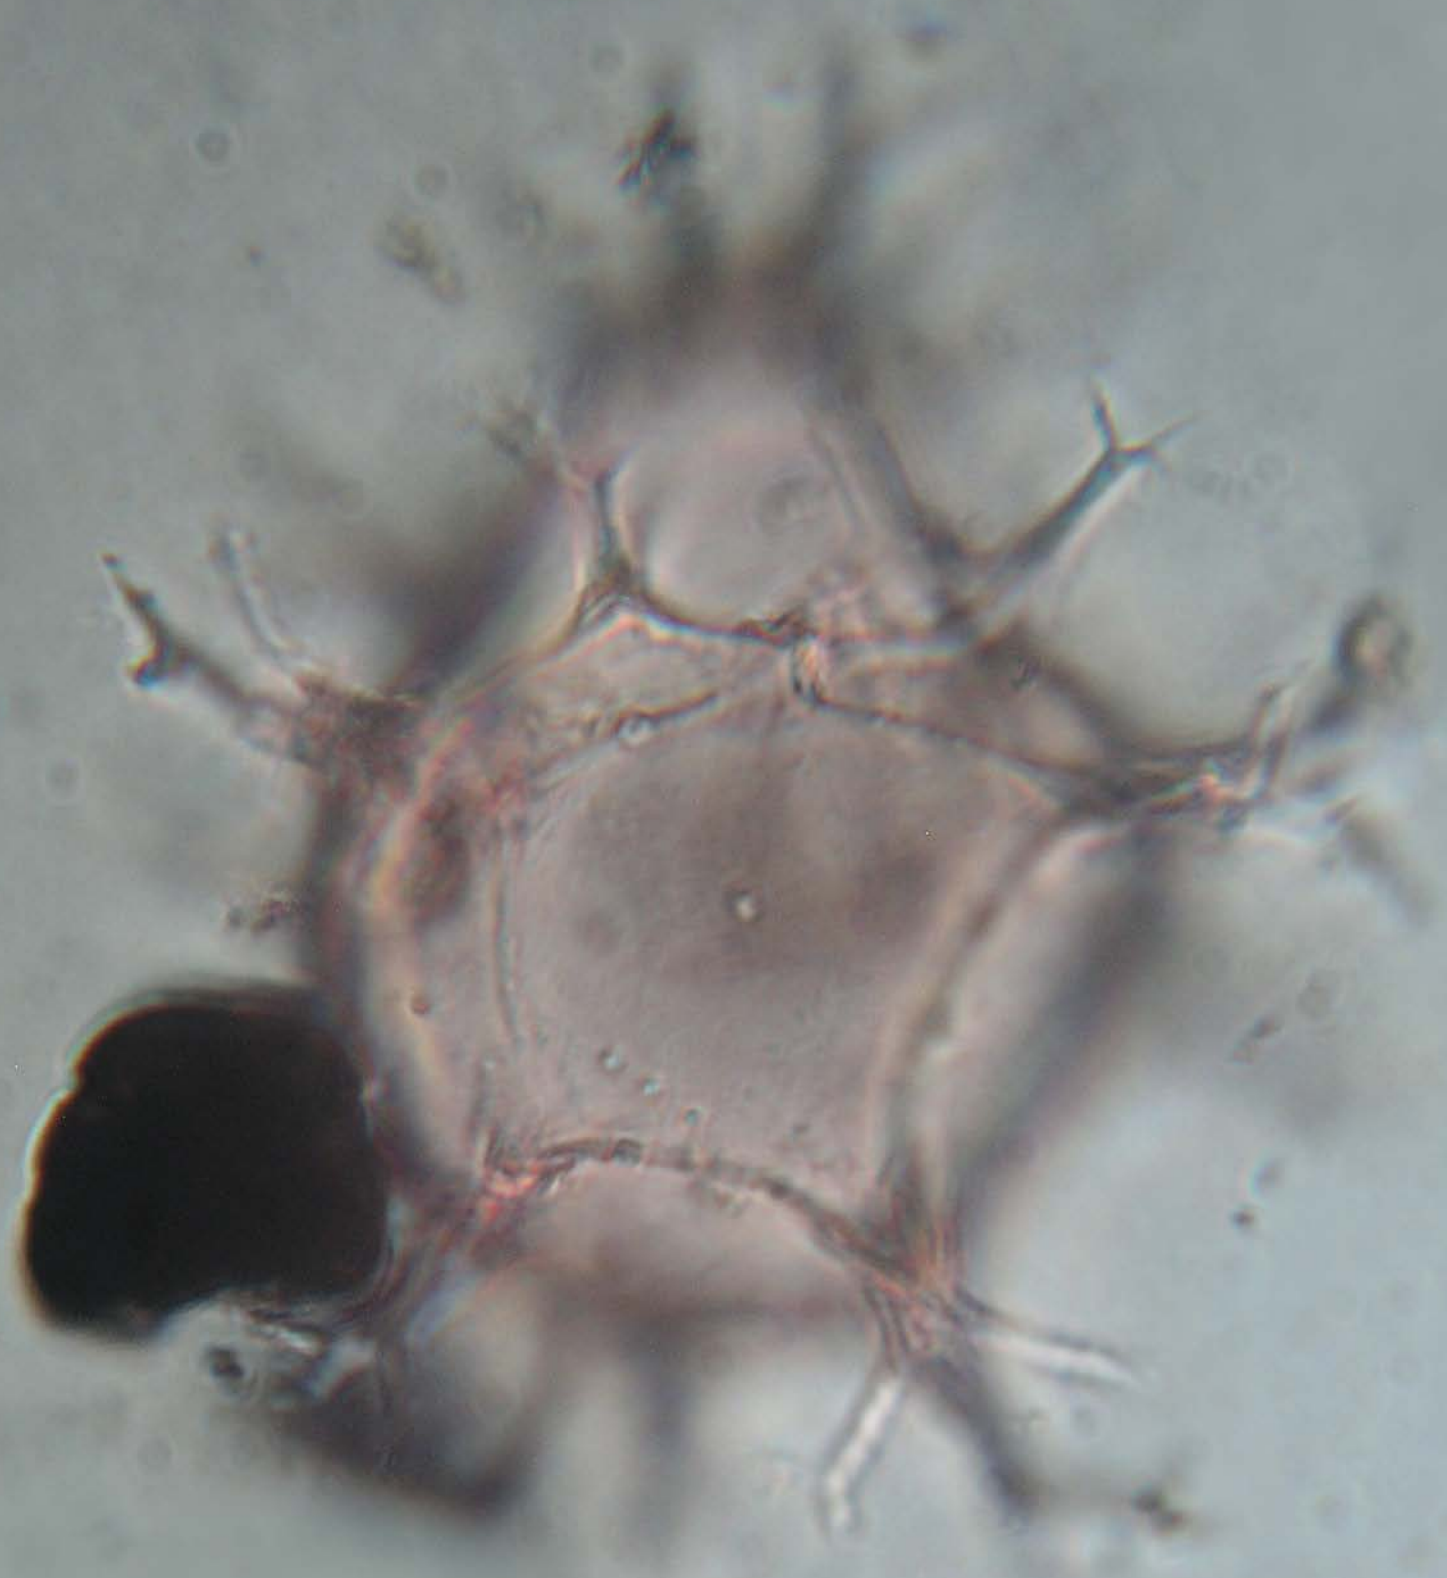

20  $\mu\text{m}$

*Spiniferites bentorii* Wall & Dale 1973
