# Supplementary material
Source: publisher figshare collection journal article supplement (https://tandf.figshare.com/articles/dataset/_/7466618)
Supplement: Supplementary file 12 [file 1]

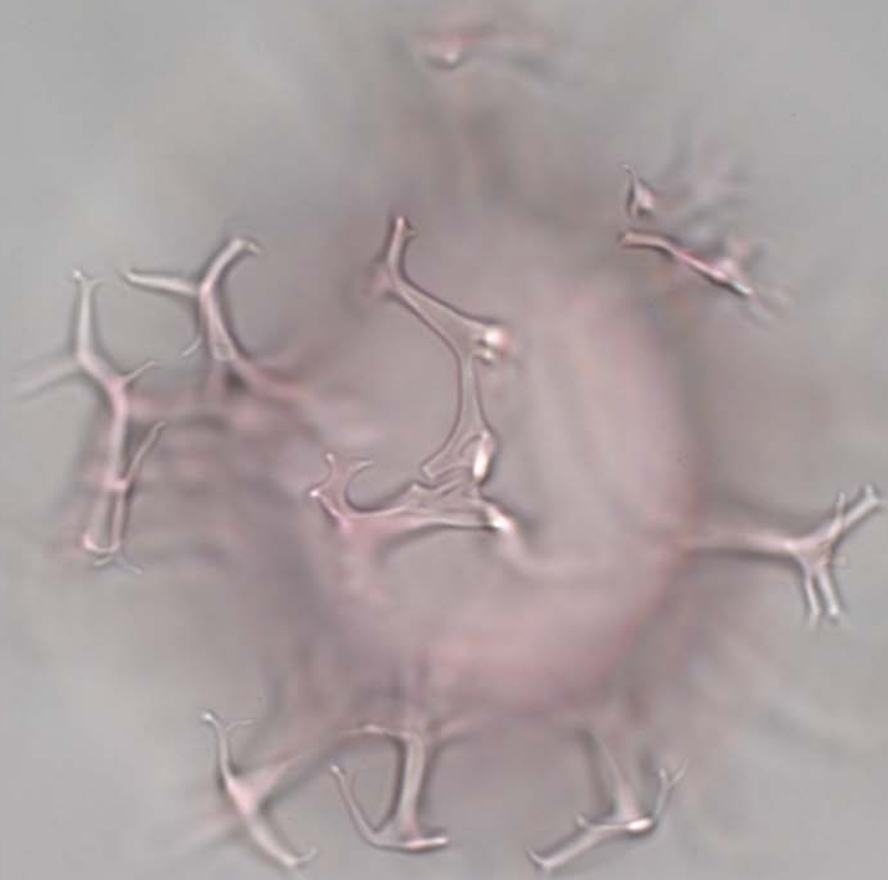

20  $\mu\text{m}$

---

*Spiniferites rhizophorus* Head  
in Head et Westphal, 1999 : holotype

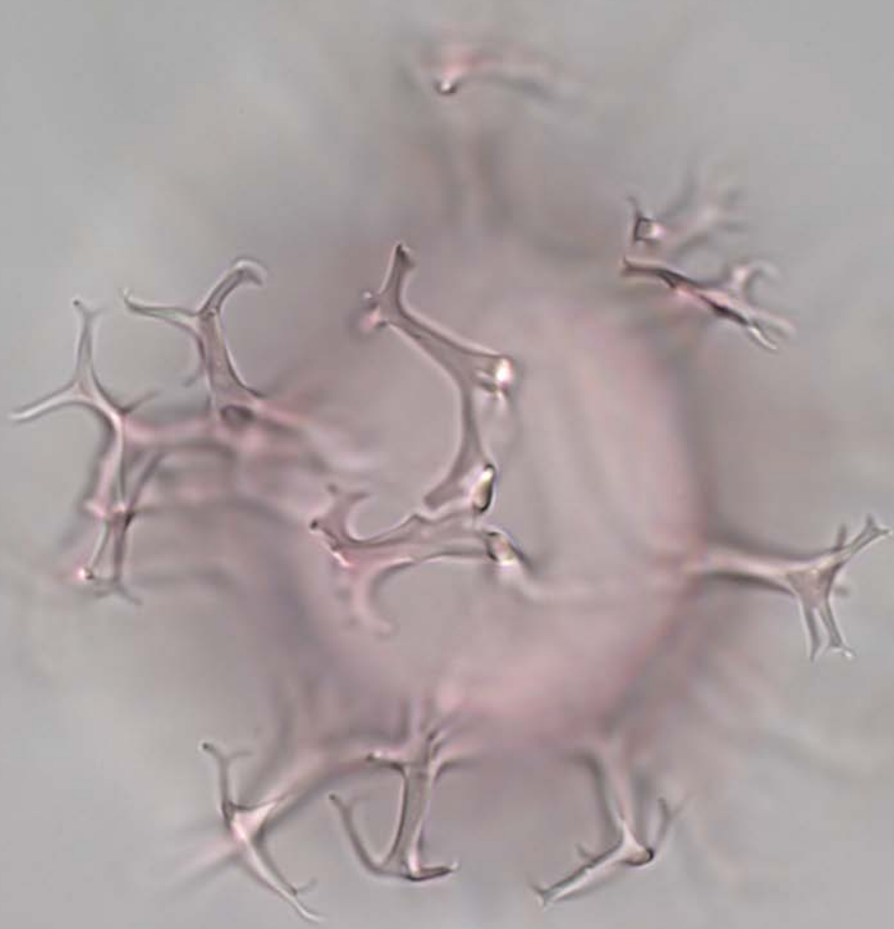

20  $\mu\text{m}$

*Spiniferites rhizophorus* Head  
in Head et Westphal, 1999 : holotype

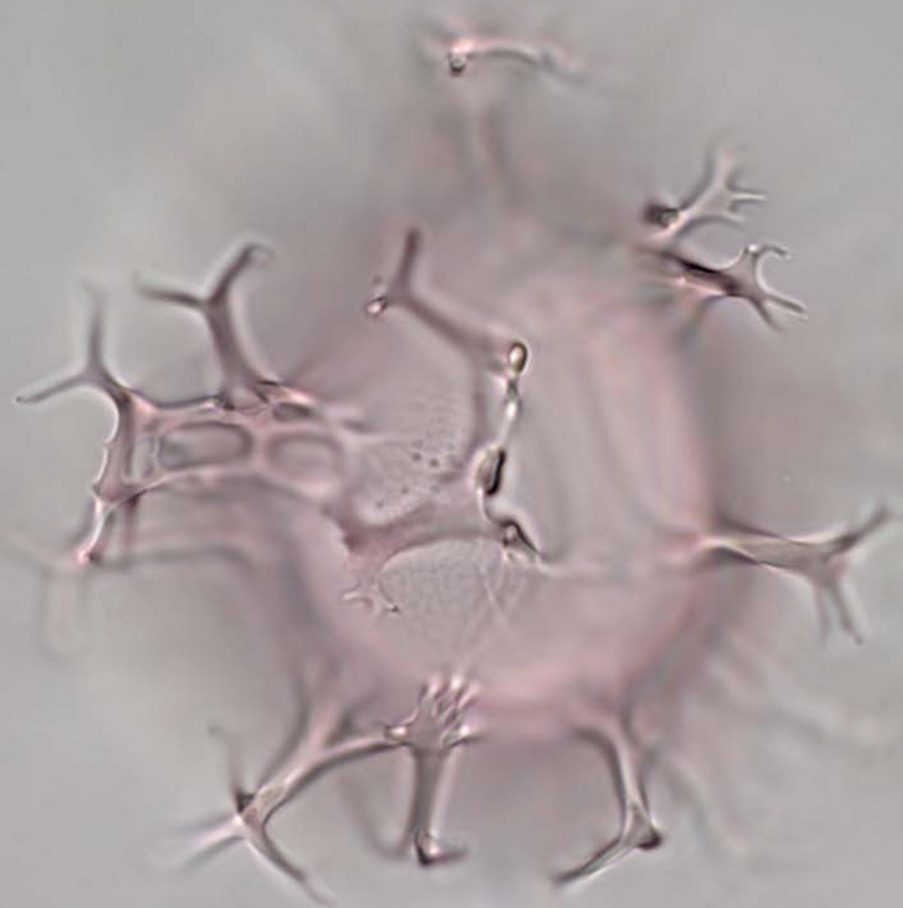

20  $\mu\text{m}$

---

*Spiniferites rhizophorus* Head  
in Head et Westphal, 1999 : holotype

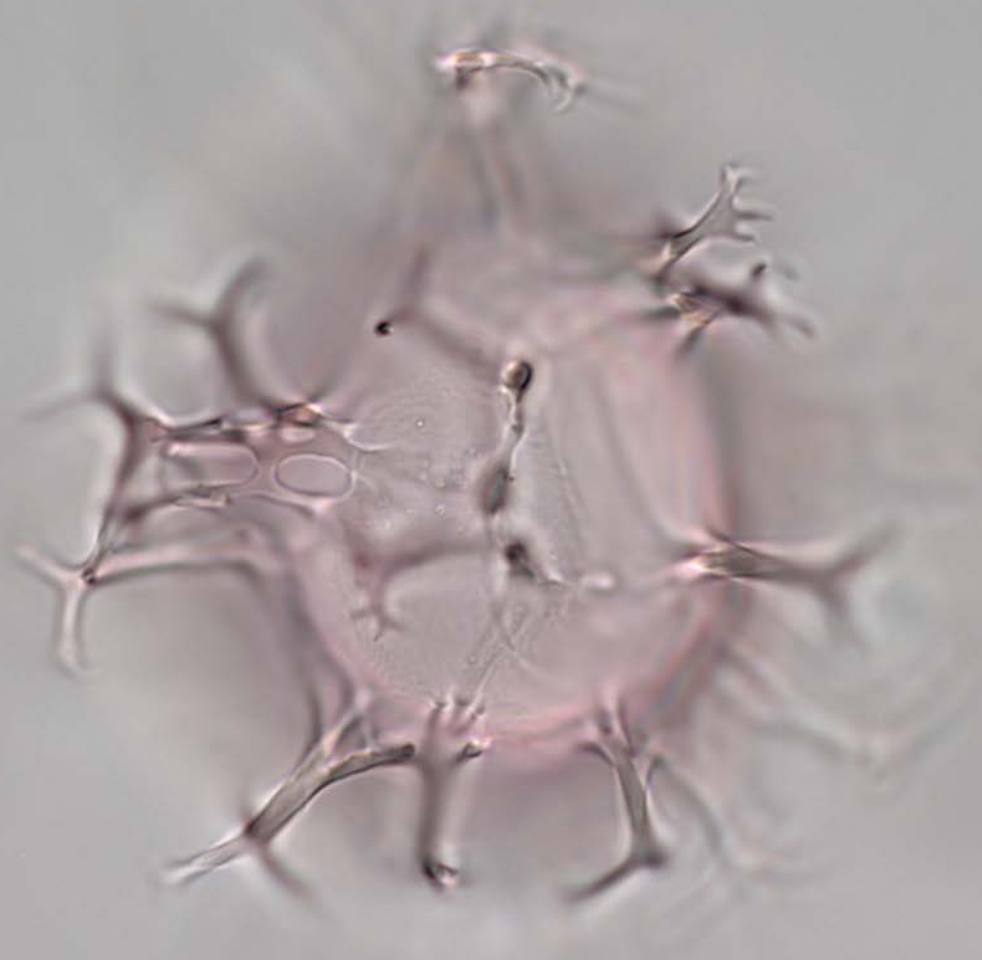

20  $\mu\text{m}$

*Spiniferites rhizophorus* Head  
in Head et Westphal, 1999 : holotype

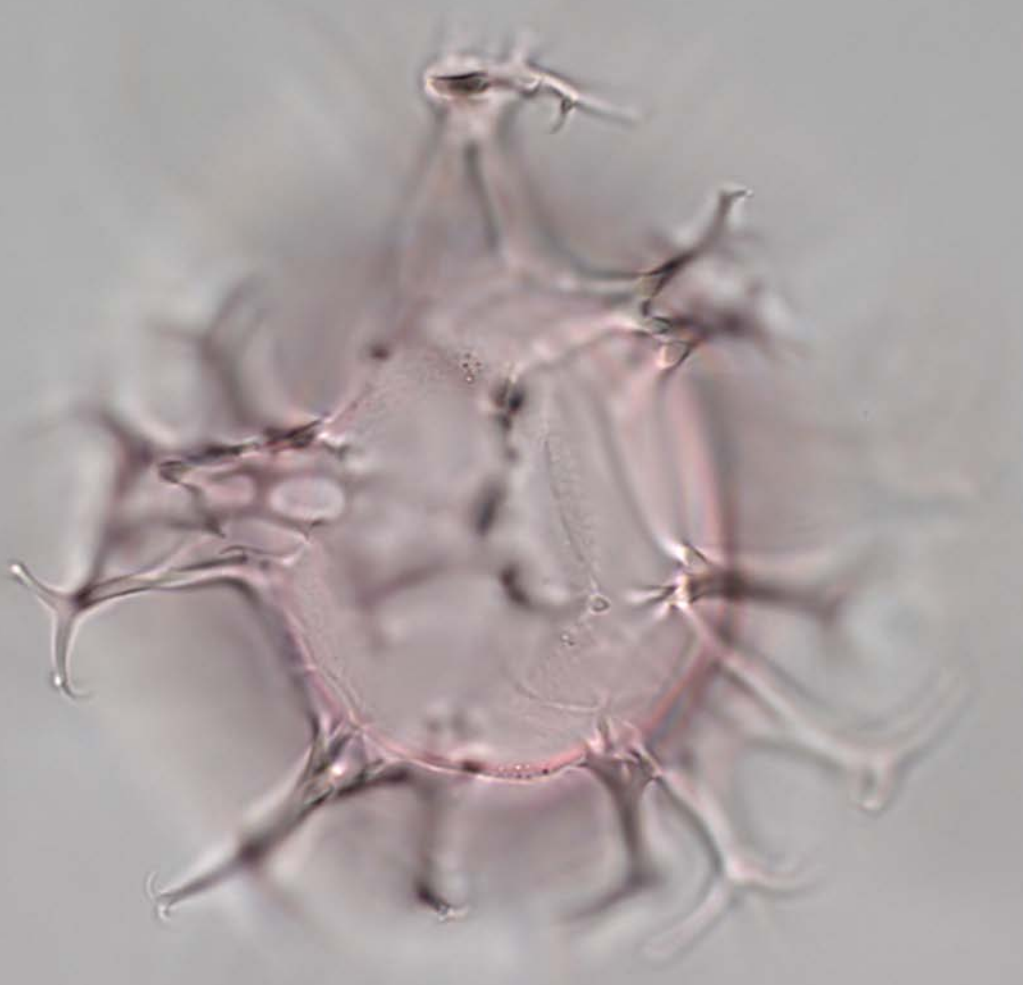

20  $\mu\text{m}$

*Spiniferites rhizophorus* Head  
in Head et Westphal, 1999 : holotype

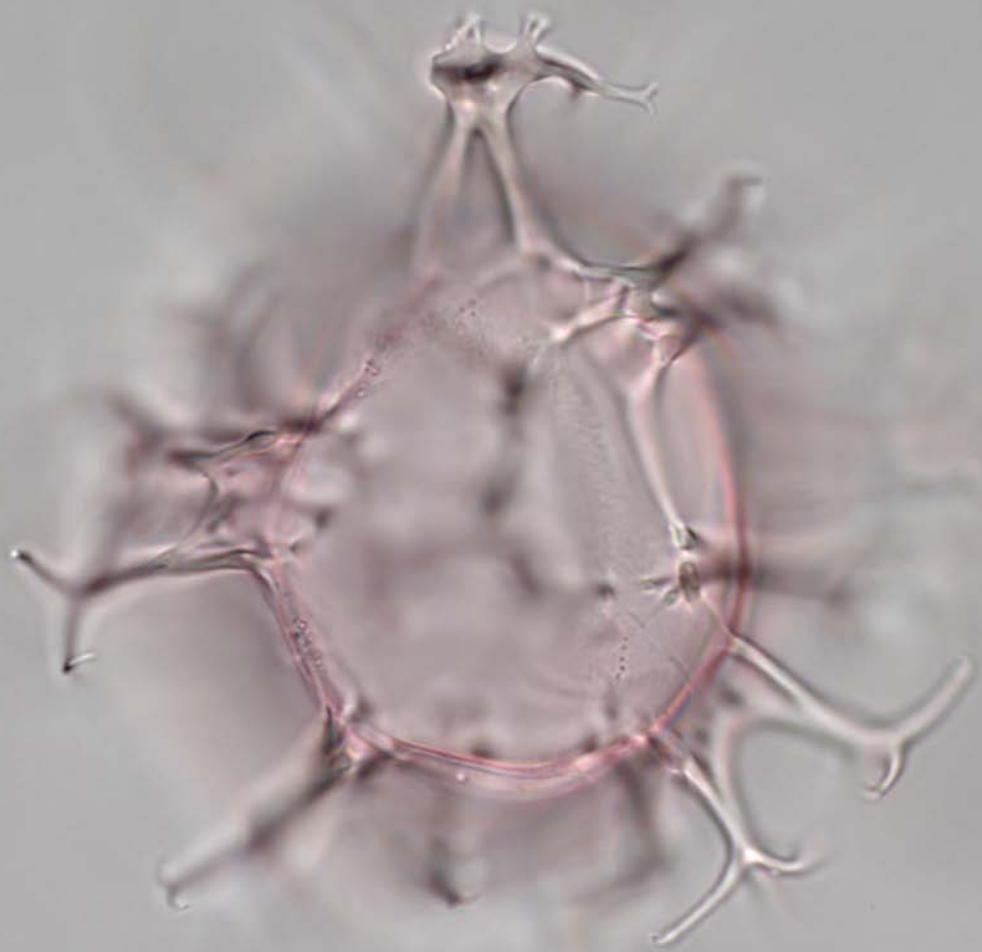

20  $\mu\text{m}$

*Spiniferites rhizophorus* Head  
in Head et Westphal, 1999 : holotype

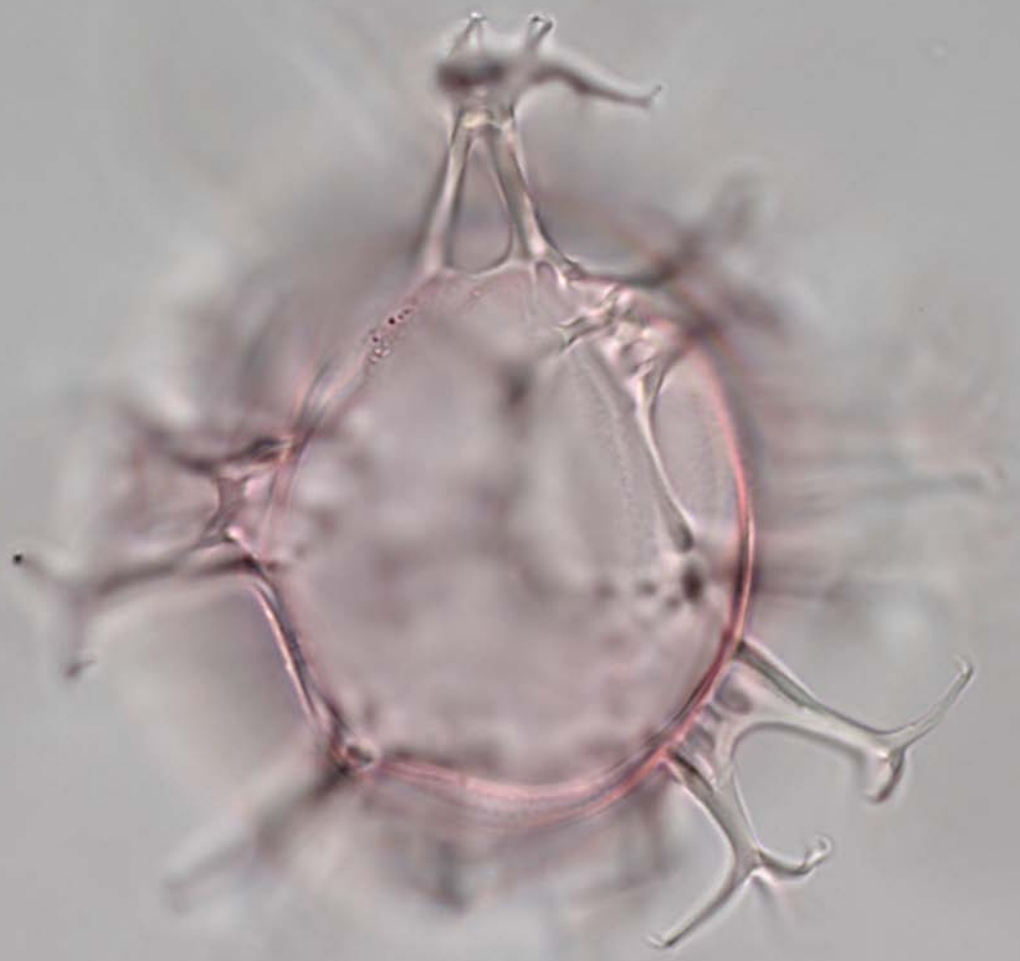

20  $\mu\text{m}$

*Spiniferites rhizophorus* Head  
in Head et Westphal, 1999 : holotype

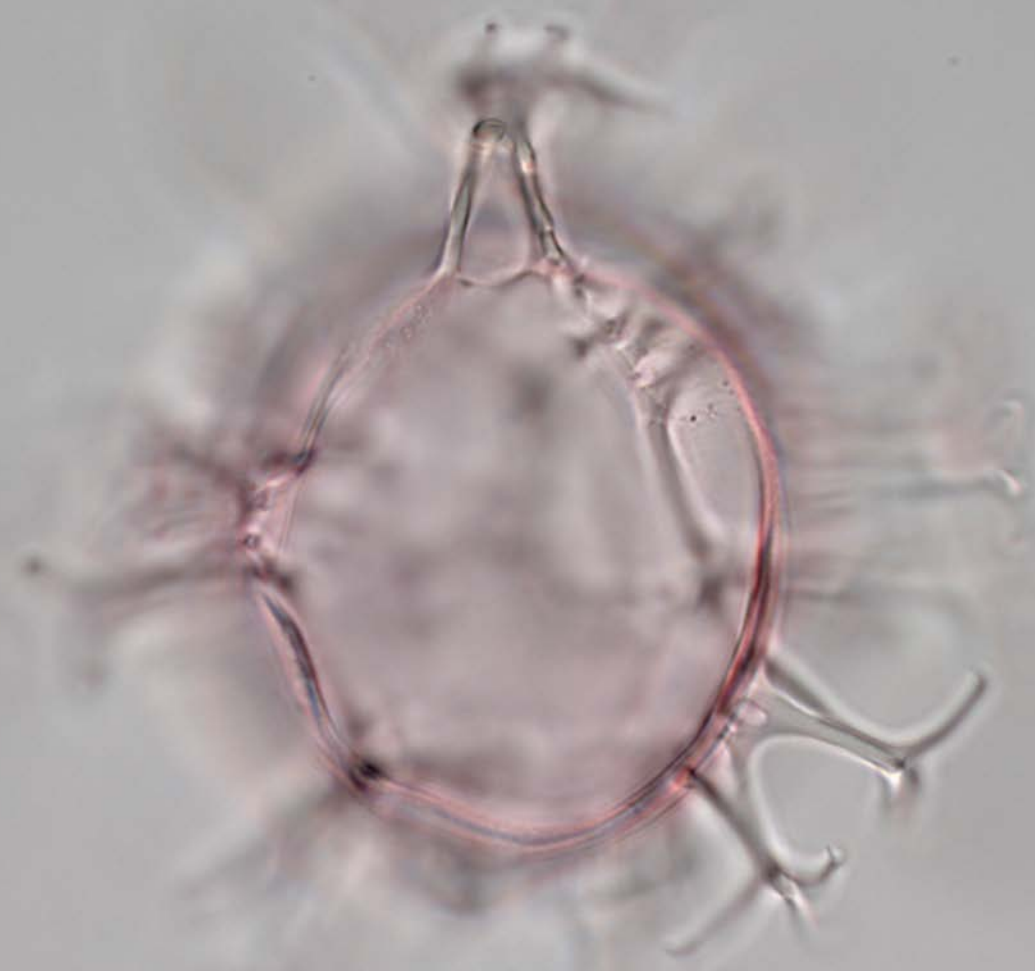

20  $\mu\text{m}$

---

*Spiniferites rhizophorus* Head  
in Head et Westphal, 1999 : holotype



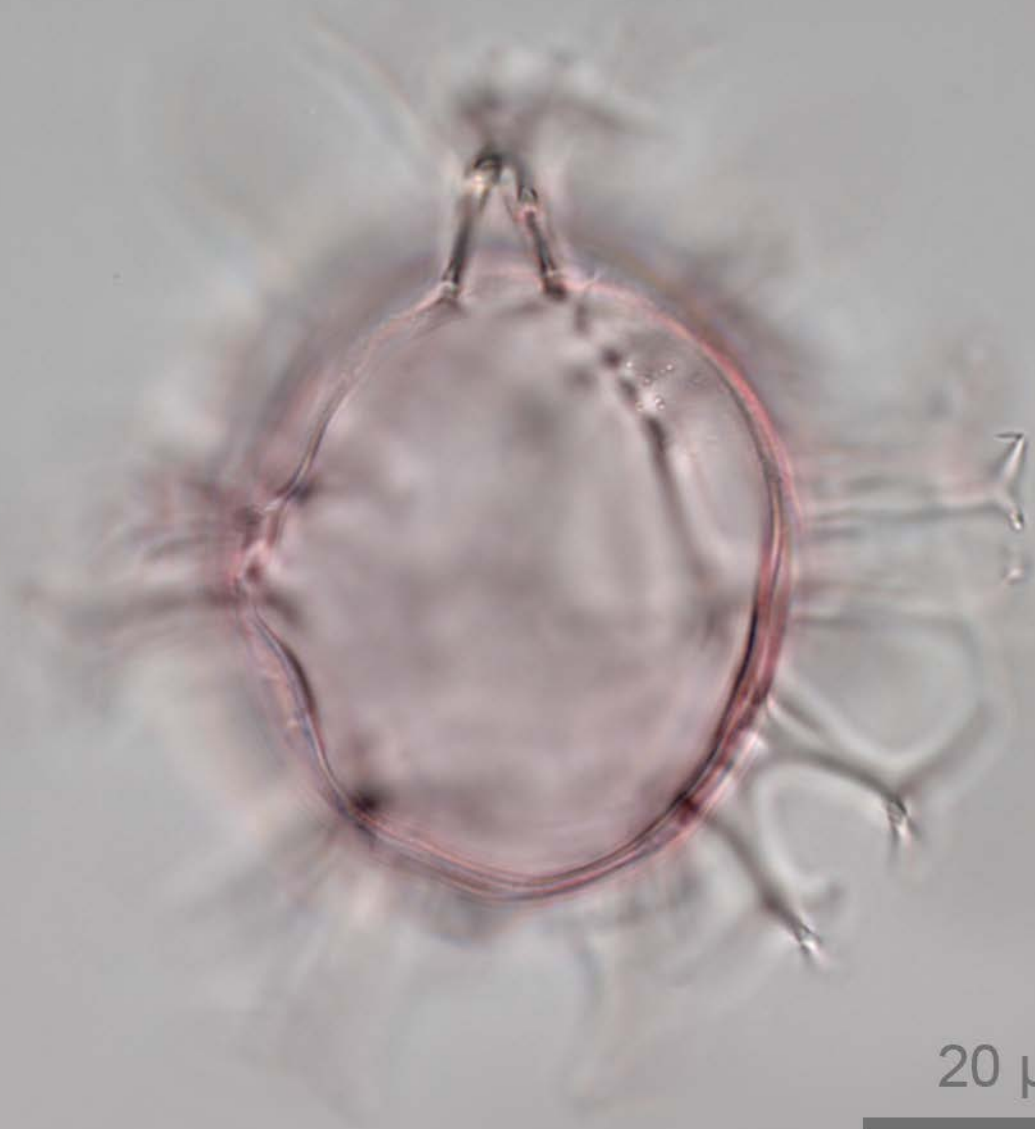

*Spiniferites rhizophorus* Head  
in Head et Westphal, 1999 : holotype

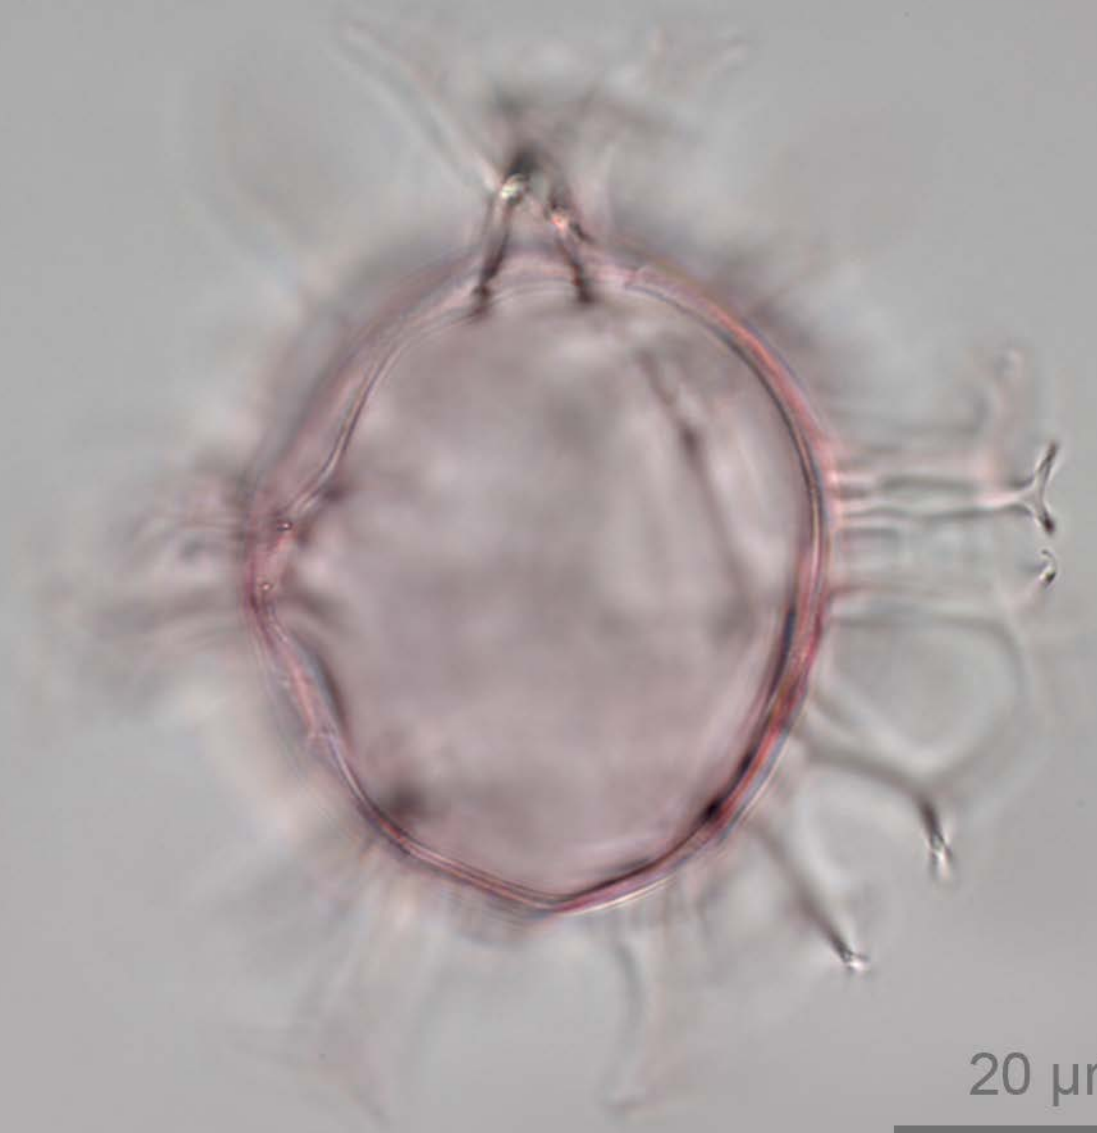

*Spiniferites rhizophorus* Head  
in Head et Westphal, 1999 : holotype

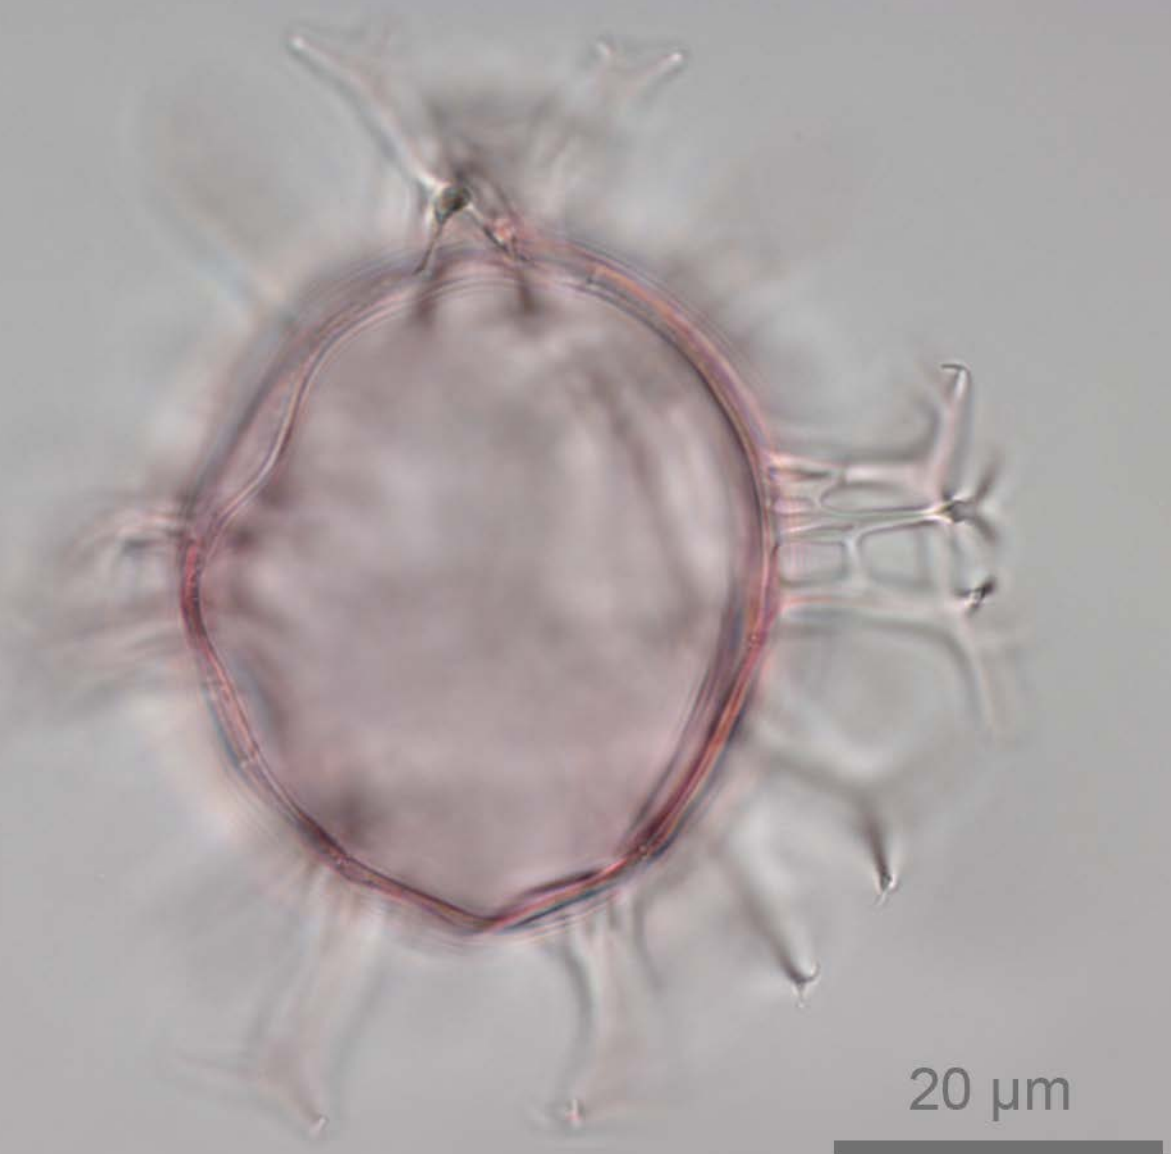

*Spiniferites rhizophorus* Head  
in Head et Westphal, 1999 : holotype

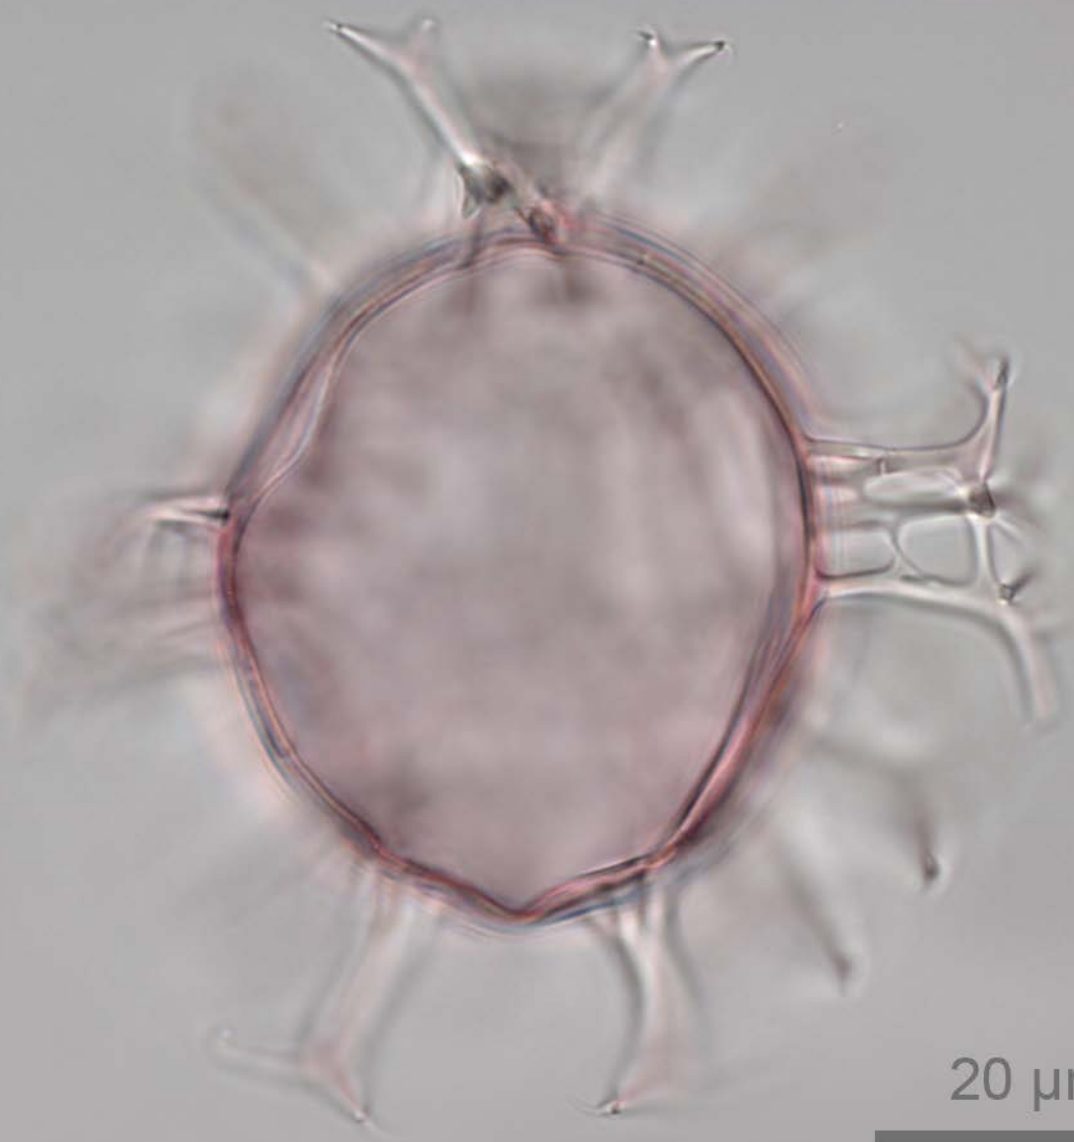

20 μm

*Spiniferites rhizophorus* Head  
in Head et Westphal, 1999 : holotype

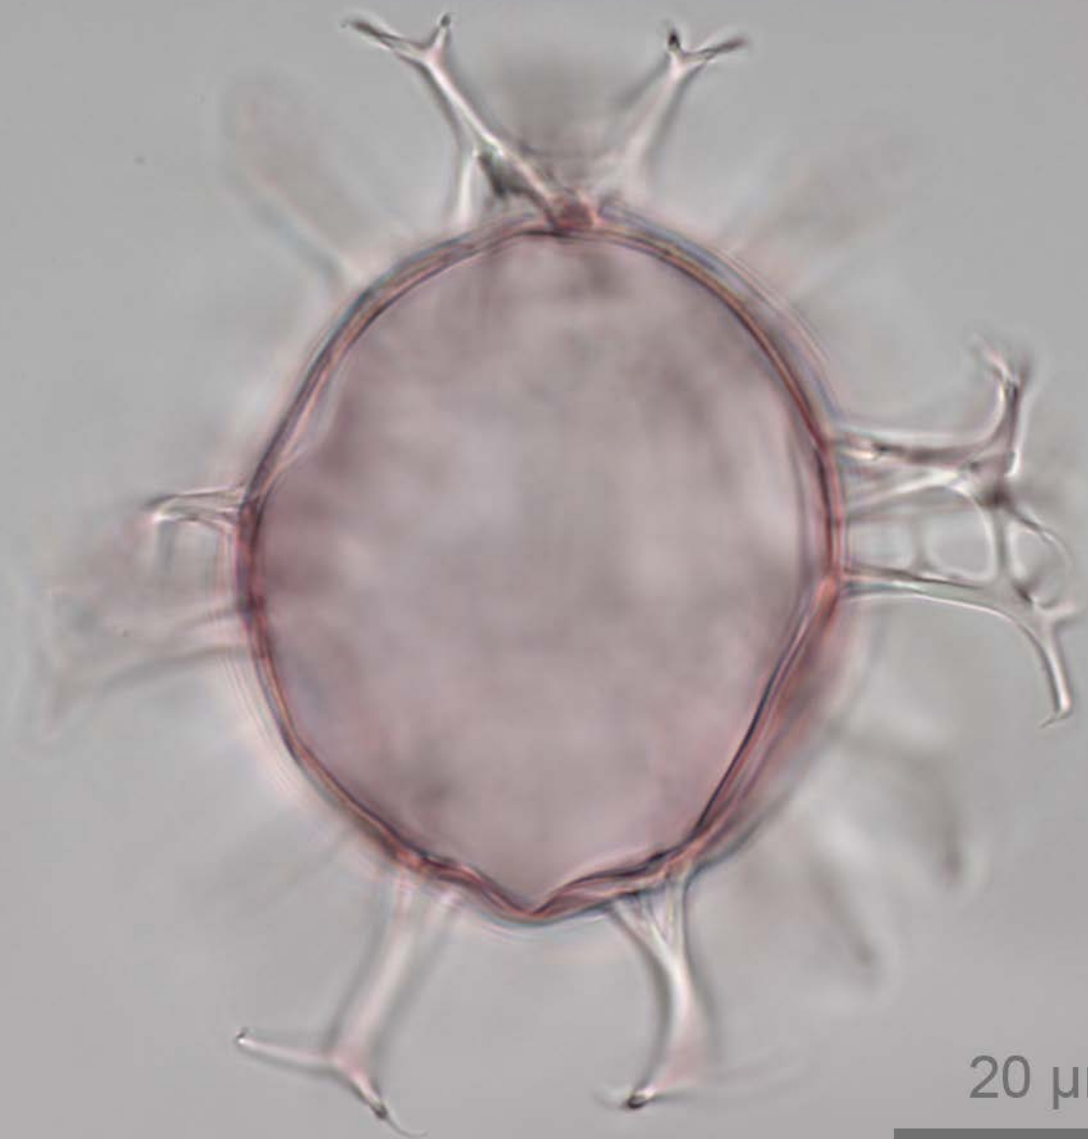

*Spiniferites rhizophorus* Head  
in Head et Westphal, 1999 : holotype

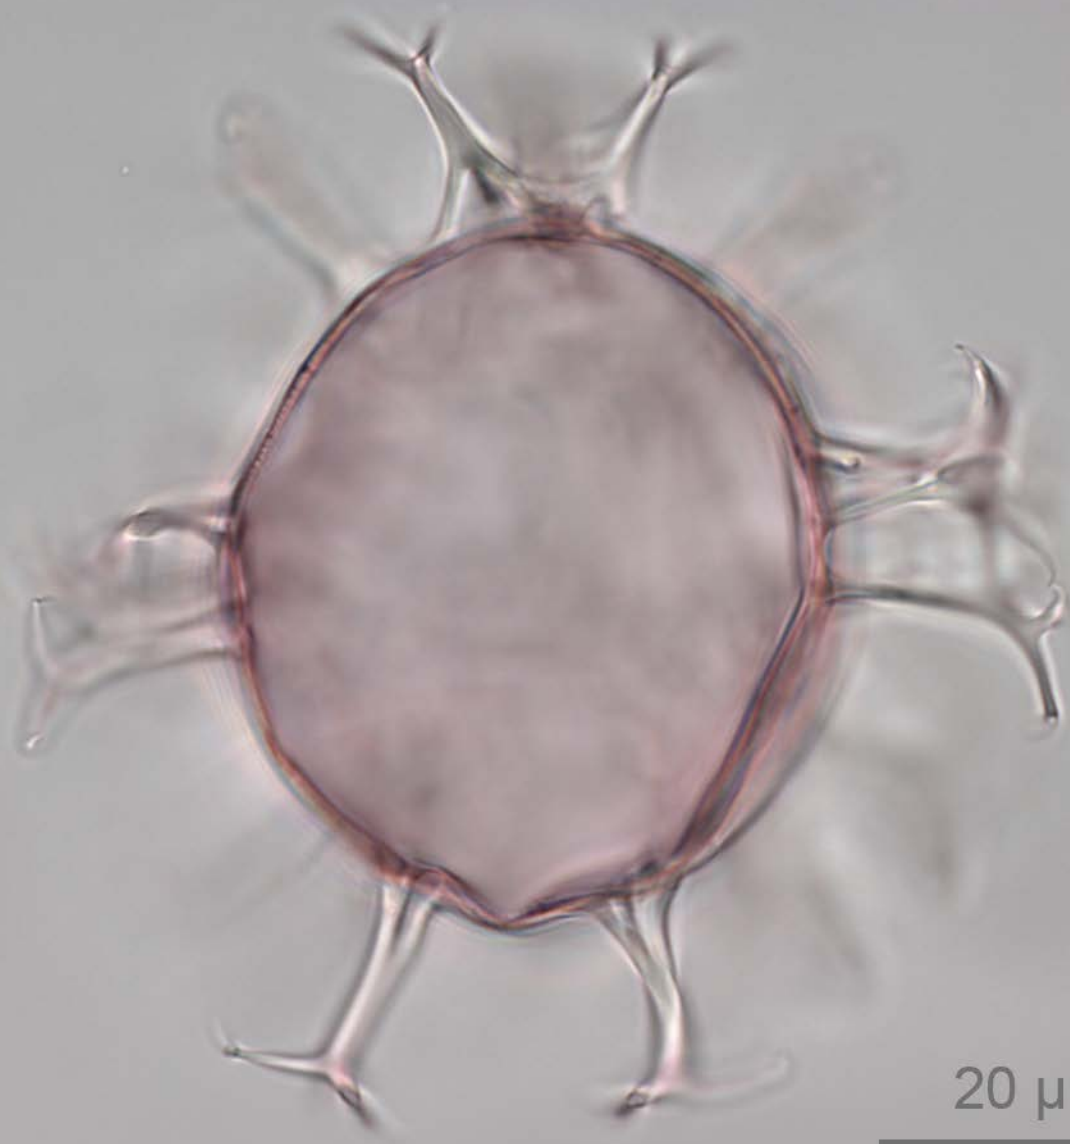

*Spiniferites rhizophorus* Head  
in Head et Westphal, 1999 : holotype

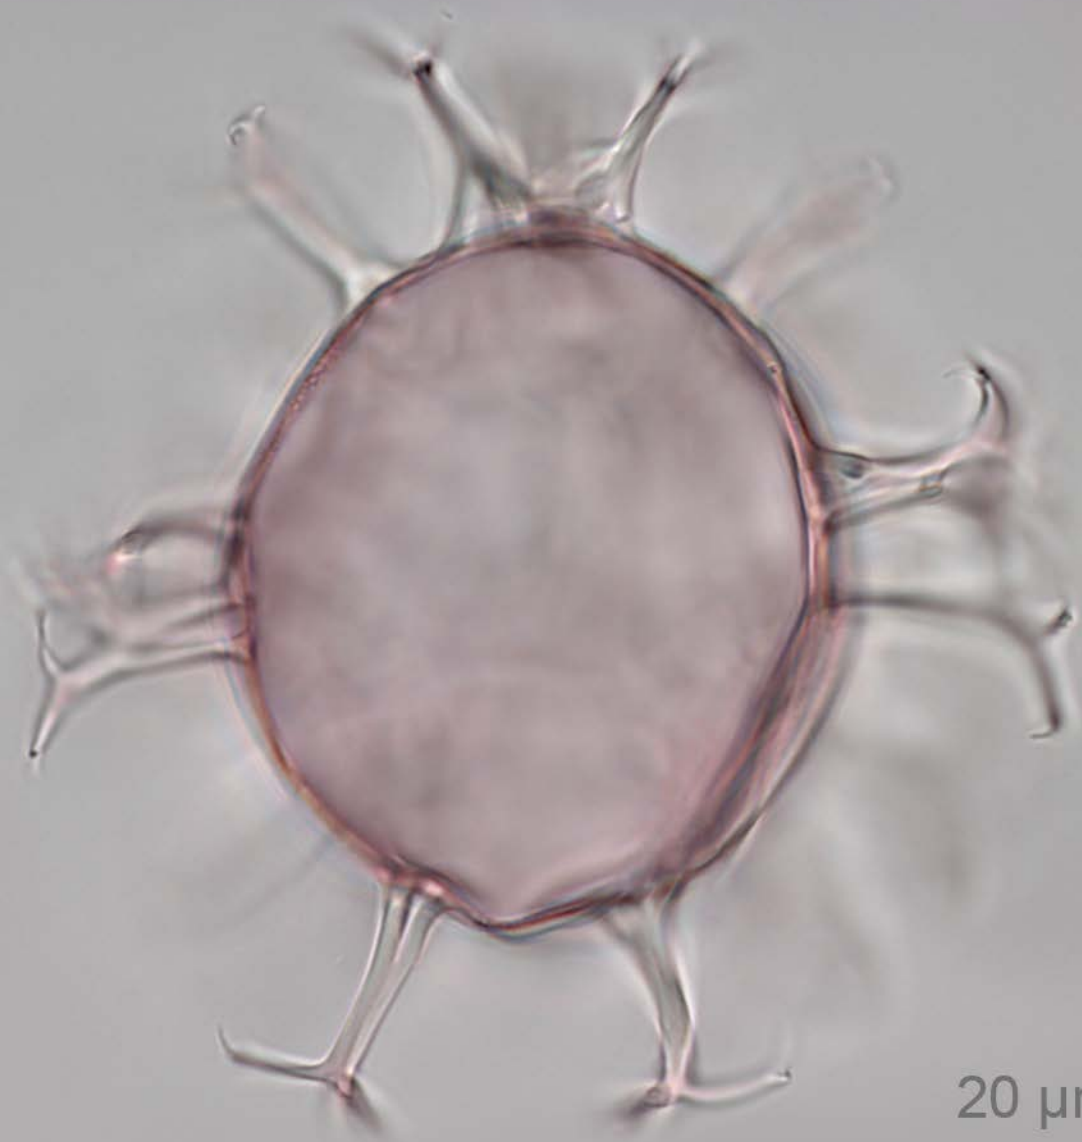

20  $\mu\text{m}$

---

*Spiniferites rhizophorus* Head  
in Head et Westphal, 1999 : holotype



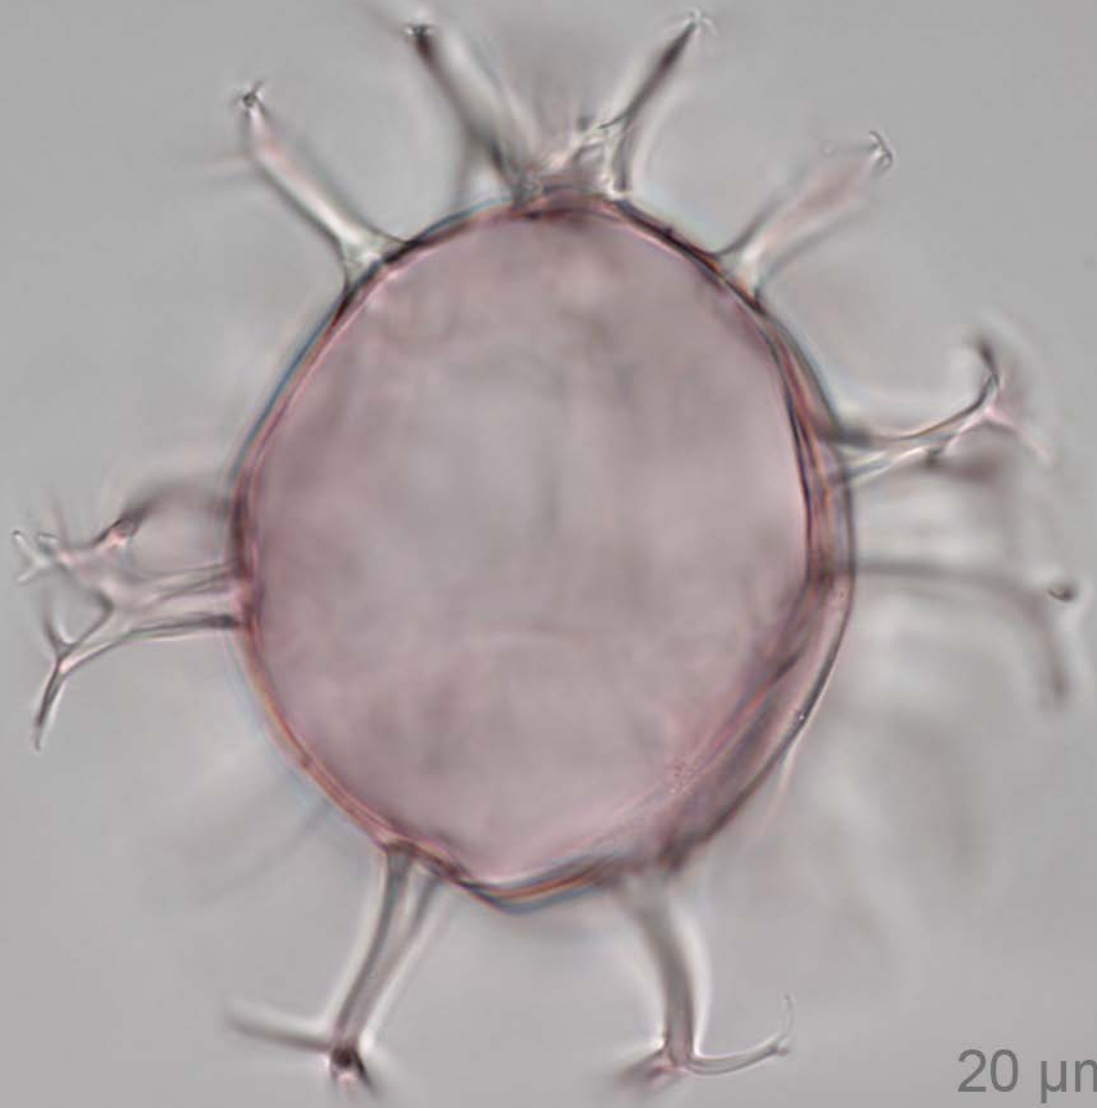

20  $\mu\text{m}$

---

*Spiniferites rhizophorus* Head  
in Head et Westphal, 1999 : holotype



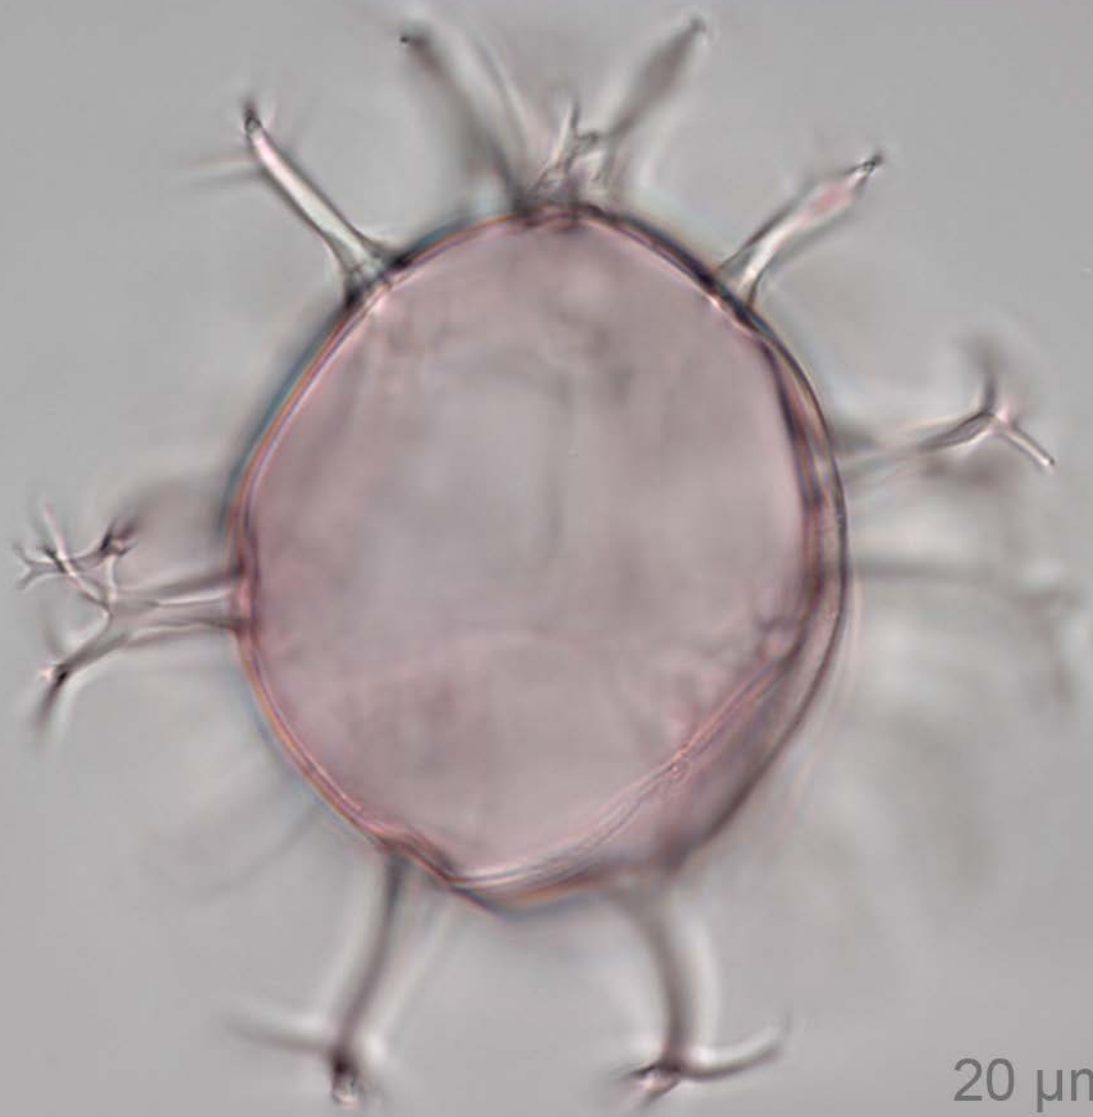

20  $\mu\text{m}$

---

*Spiniferites rhizophorus* Head  
in Head et Westphal, 1999 : holotype

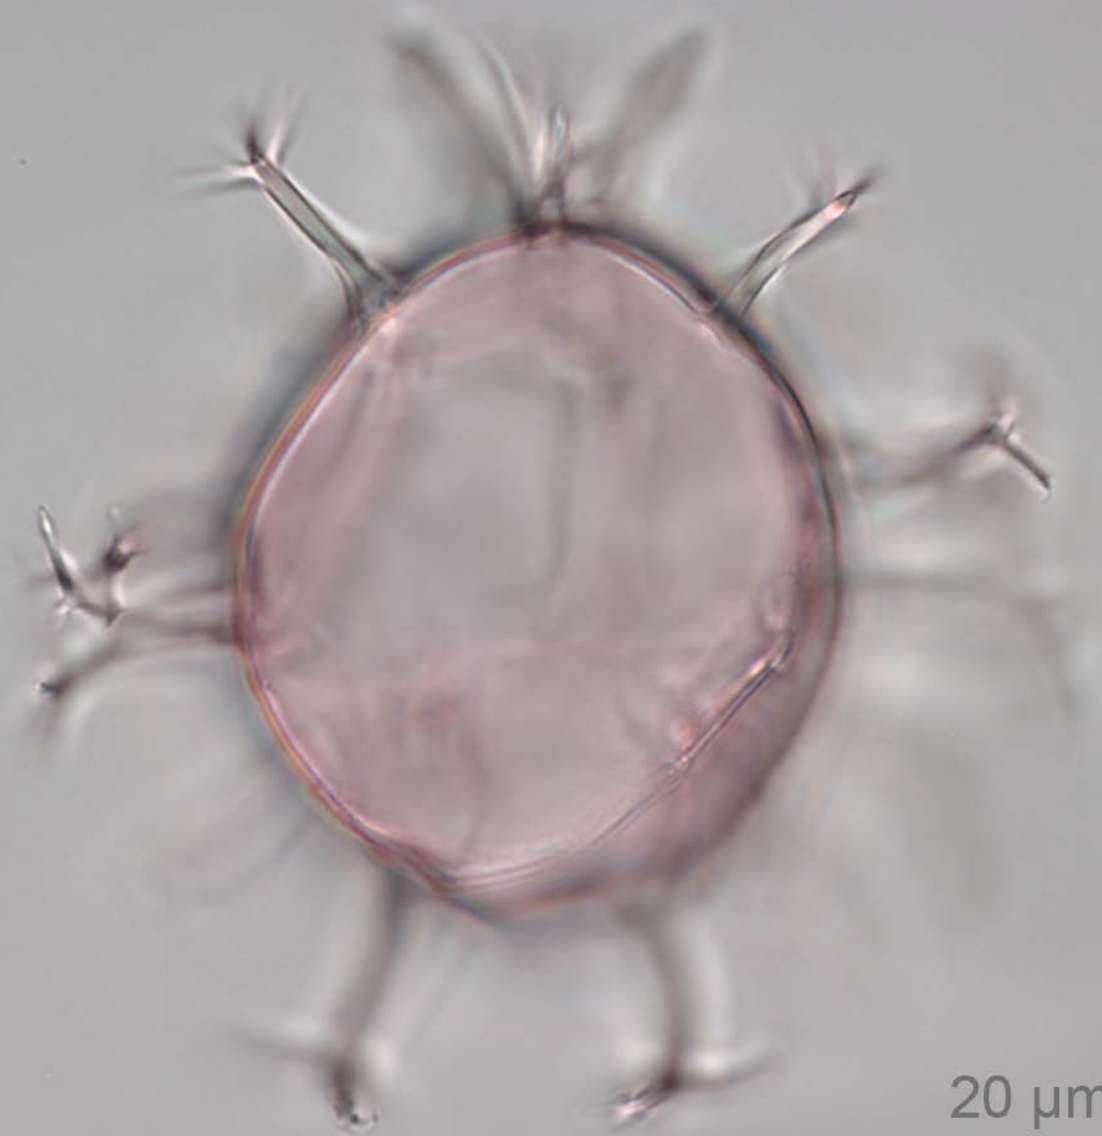

*Spiniferites rhizophorus* Head  
in Head et Westphal, 1999 : holotype

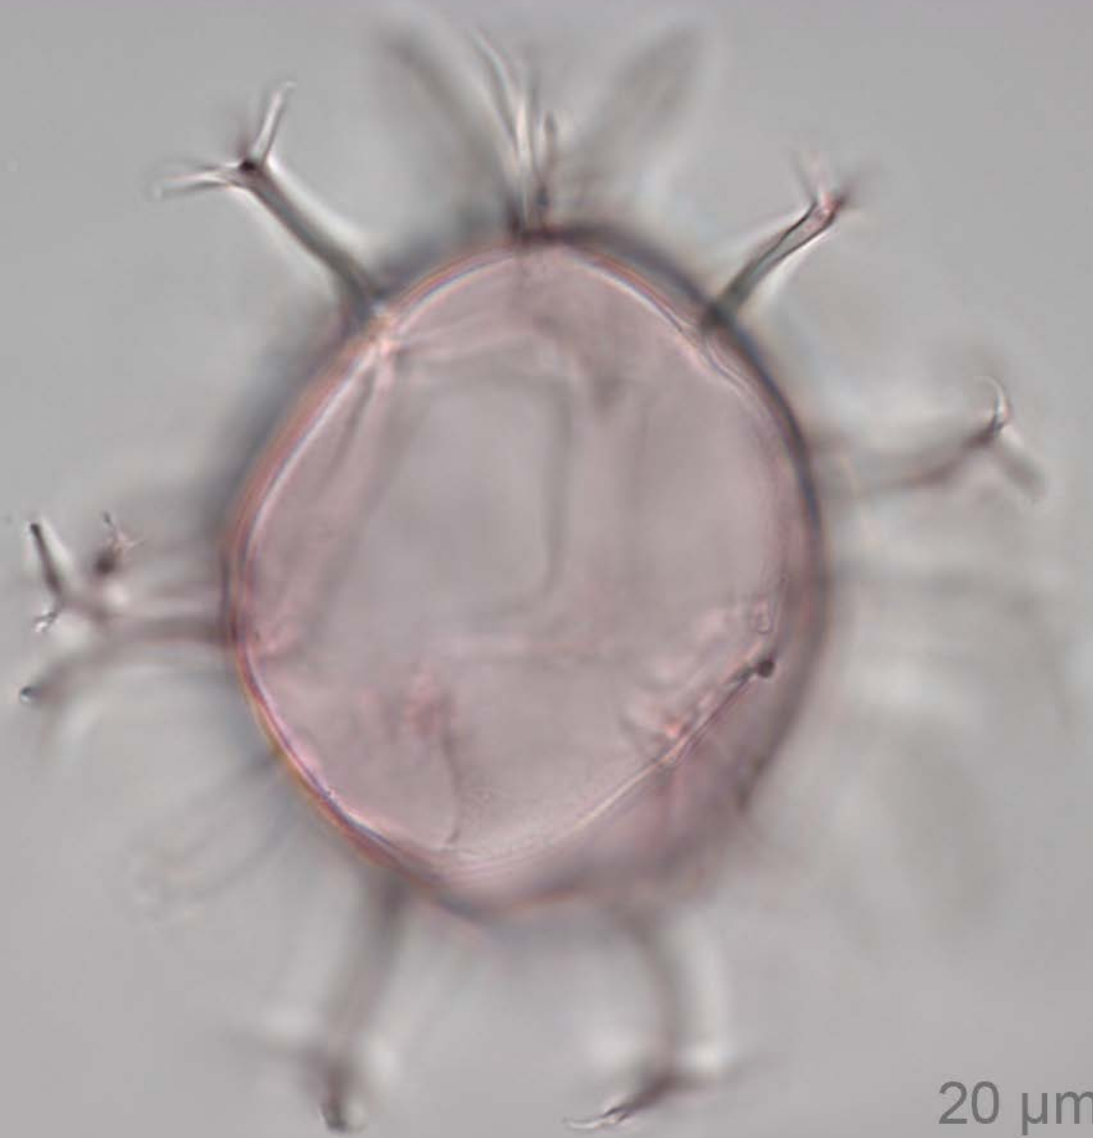

20  $\mu\text{m}$

---

*Spiniferites rhizophorus* Head  
in Head et Westphal, 1999 : holotype

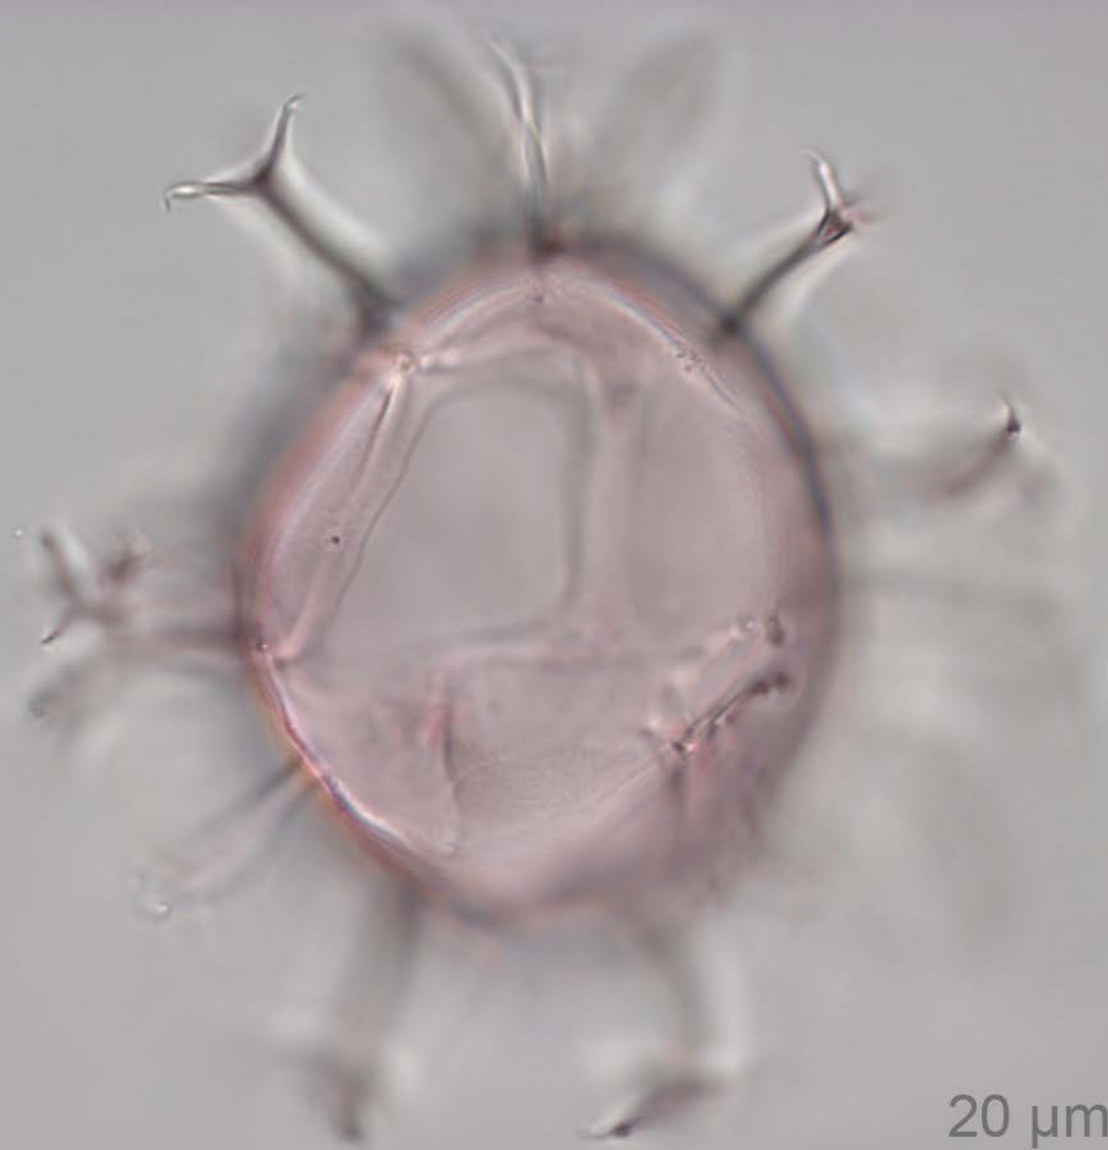

*Spiniferites rhizophorus* Head  
in Head et Westphal, 1999 : holotype

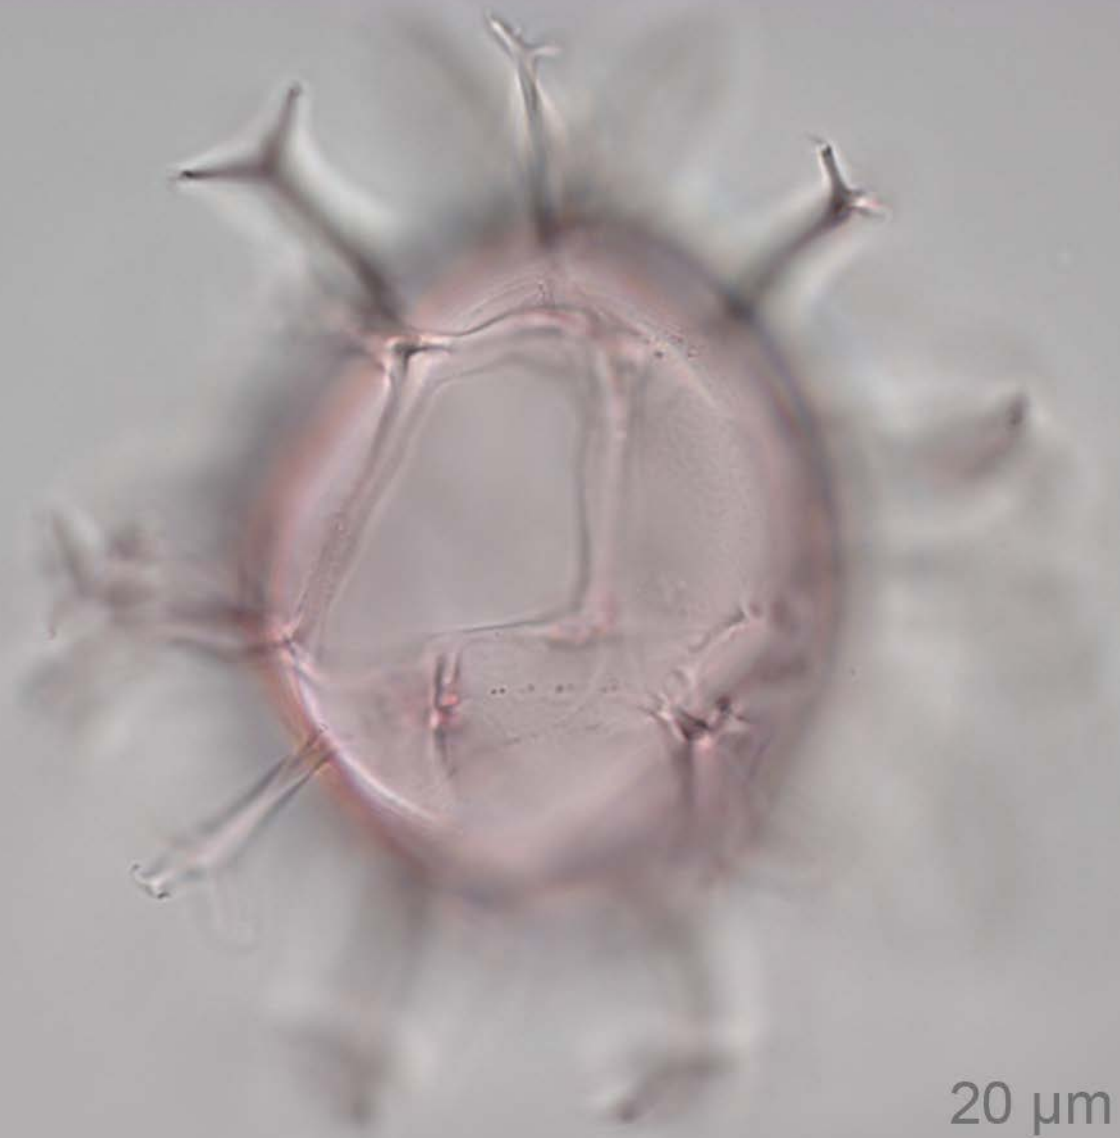

*Spiniferites rhizophorus* Head  
in Head et Westphal, 1999 : holotype

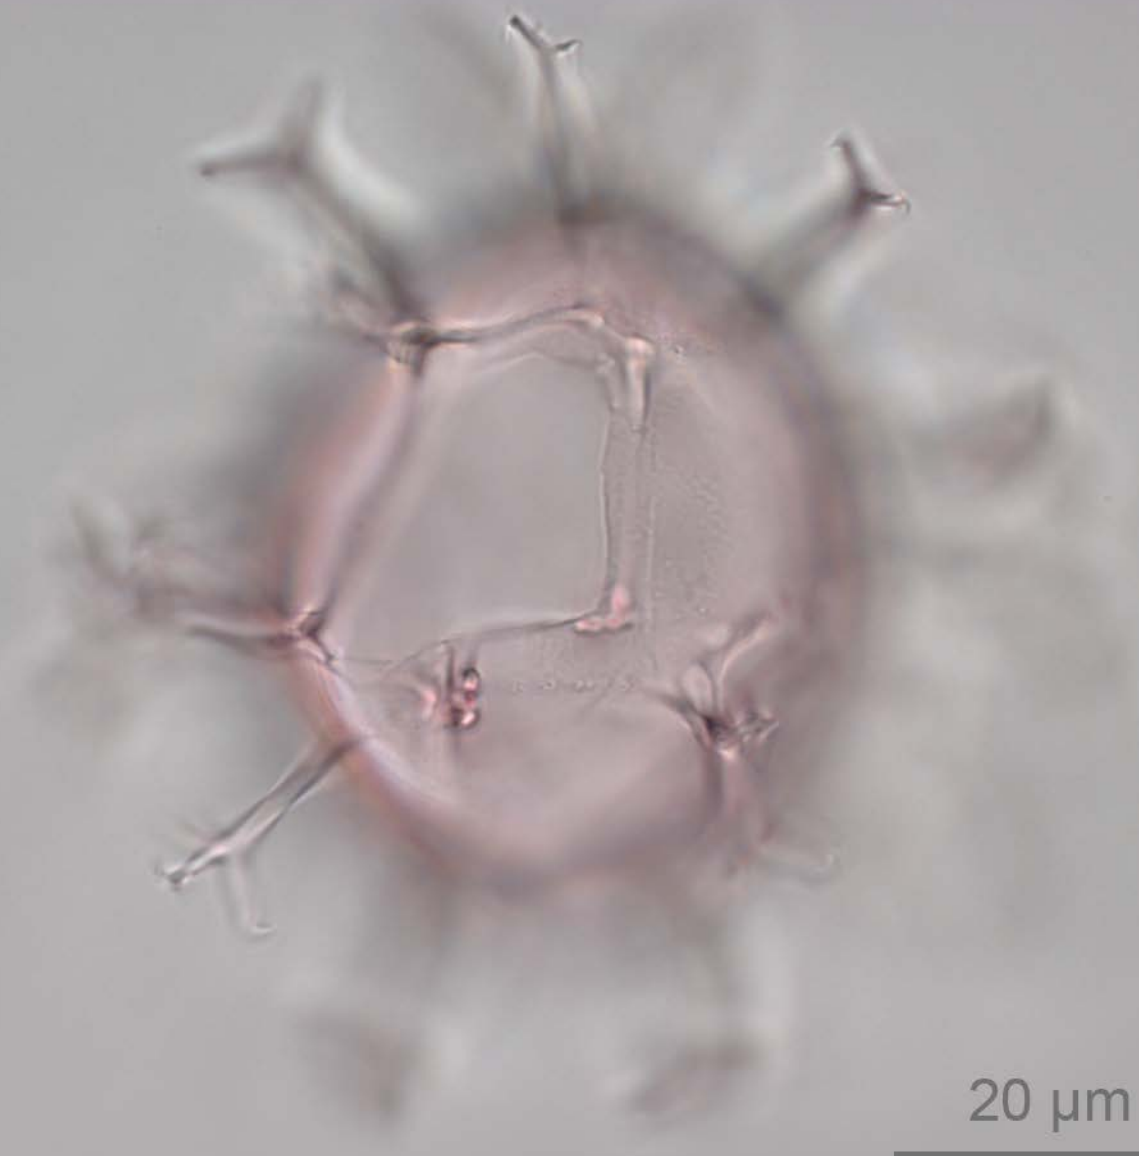

*Spiniferites rhizophorus* Head  
in Head et Westphal, 1999 : holotype

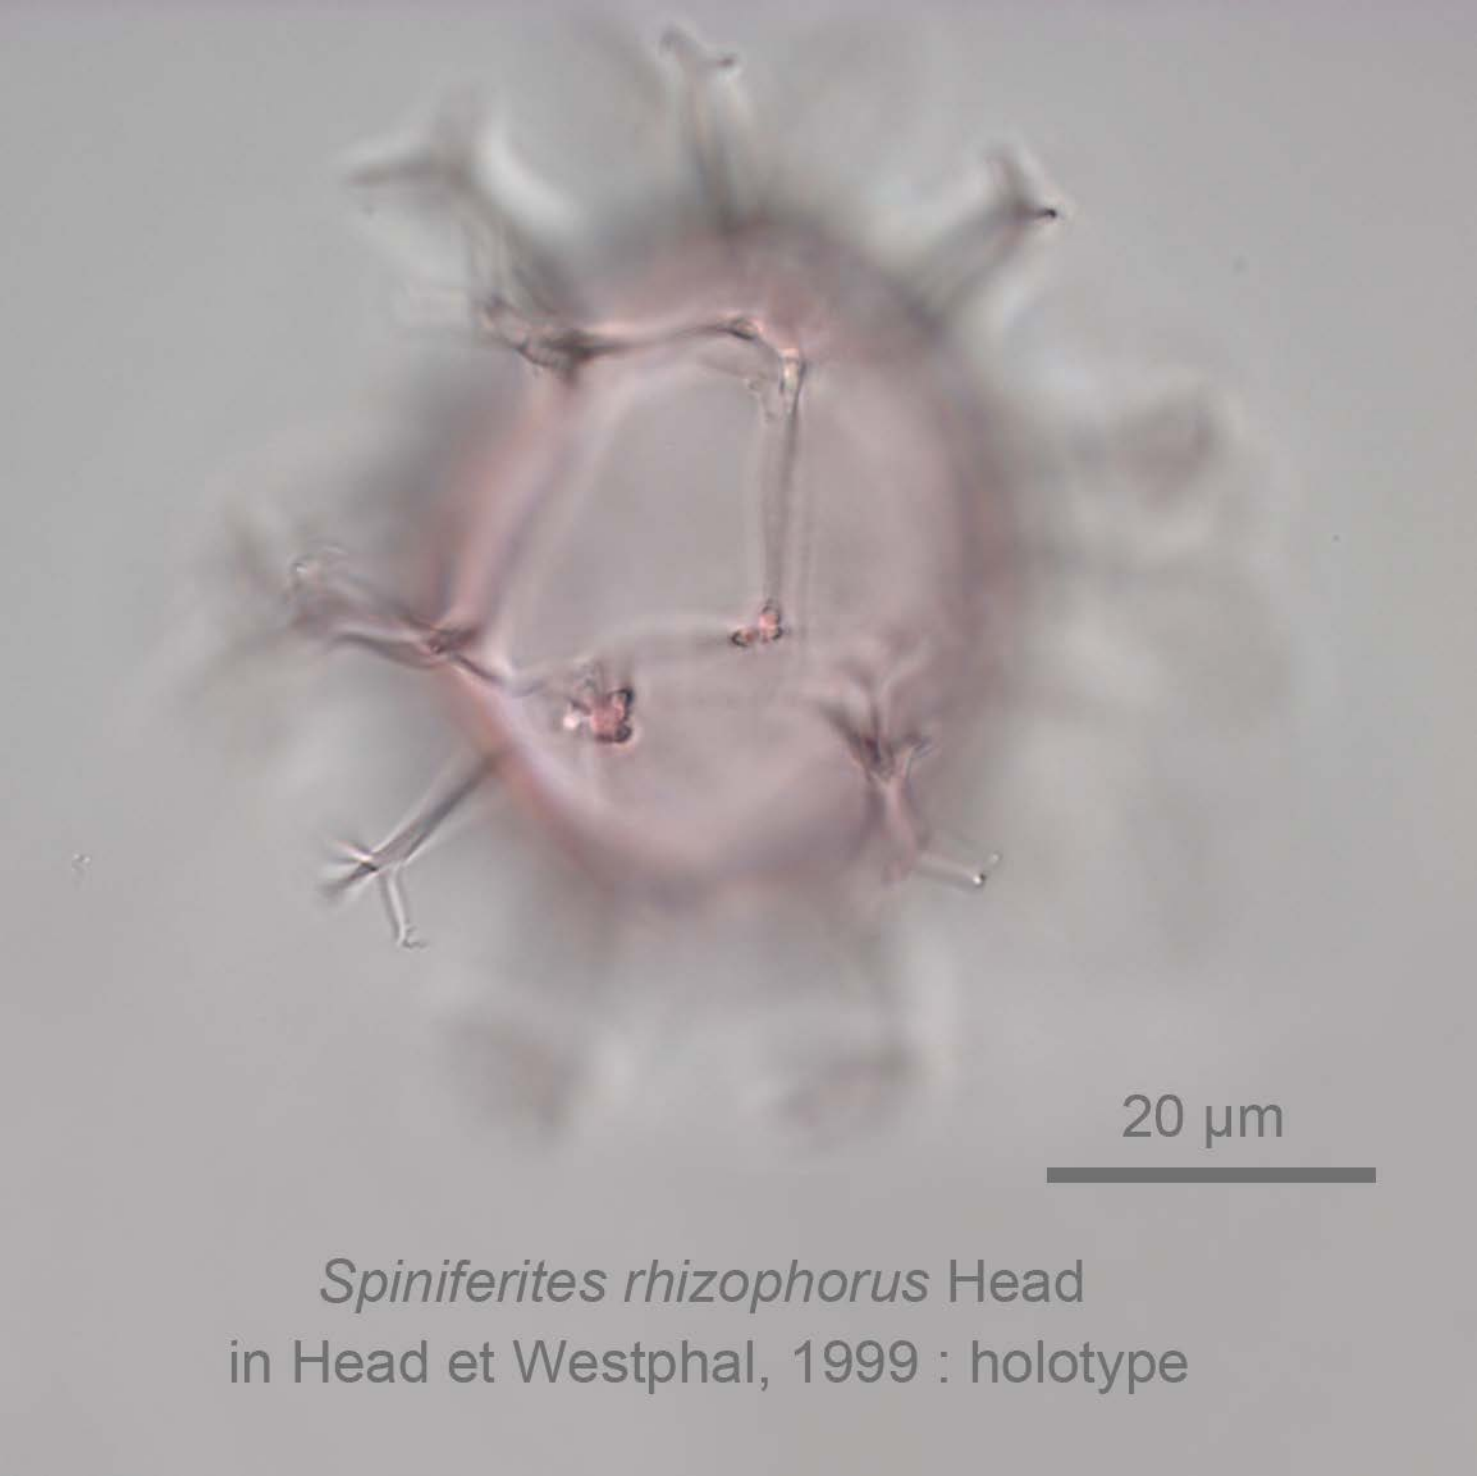

20 μm

*Spiniferites rhizophorus* Head  
in Head et Westphal, 1999 : holotype

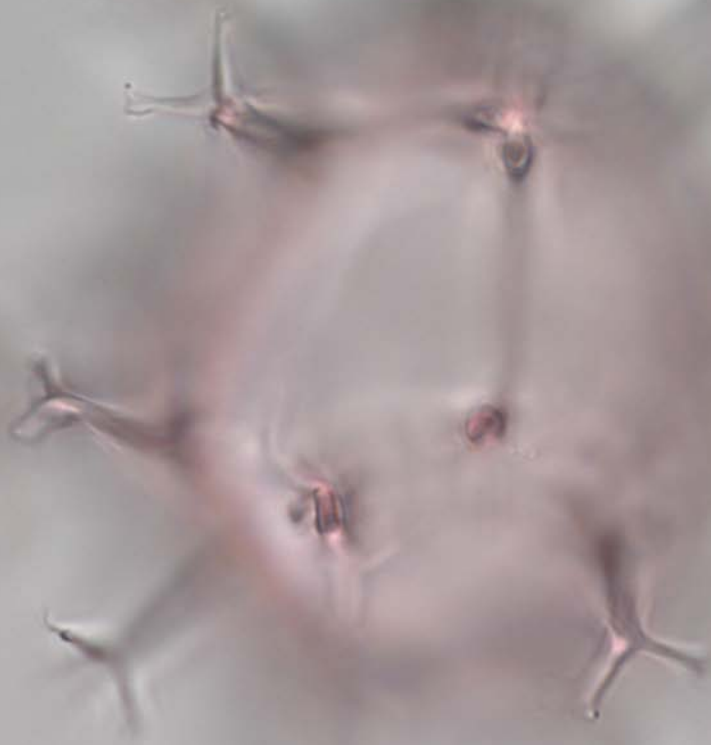

20  $\mu\text{m}$

*Spiniferites rhizophorus* Head  
in Head et Westphal, 1999 : holotype



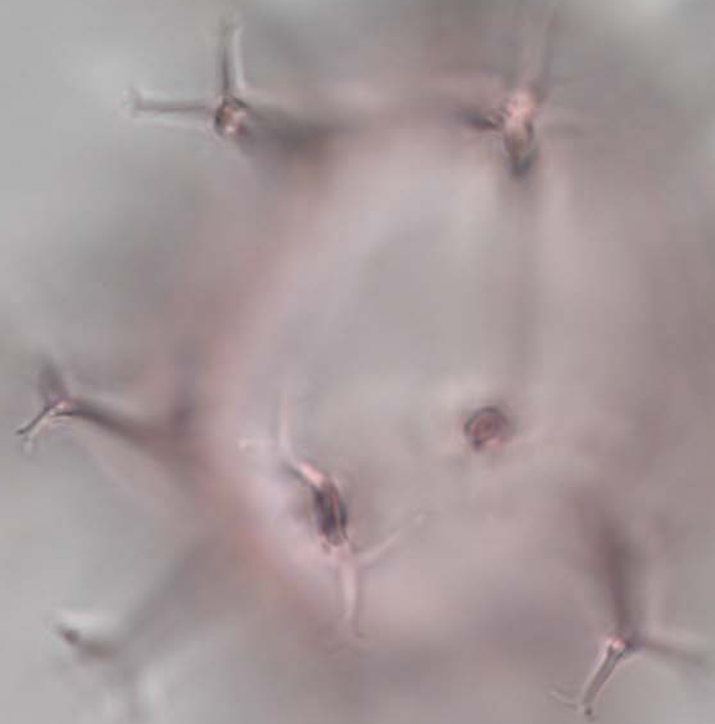

20  $\mu\text{m}$

*Spiniferites rhizophorus* Head  
in Head et Westphal, 1999 : holotype

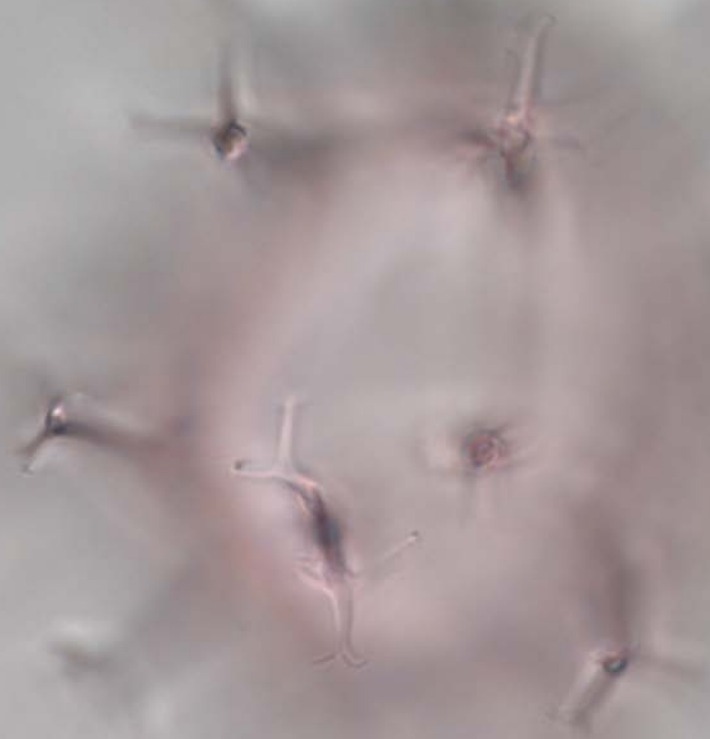

20  $\mu\text{m}$

*Spiniferites rhizophorus* Head  
in Head et Westphal, 1999 : holotype

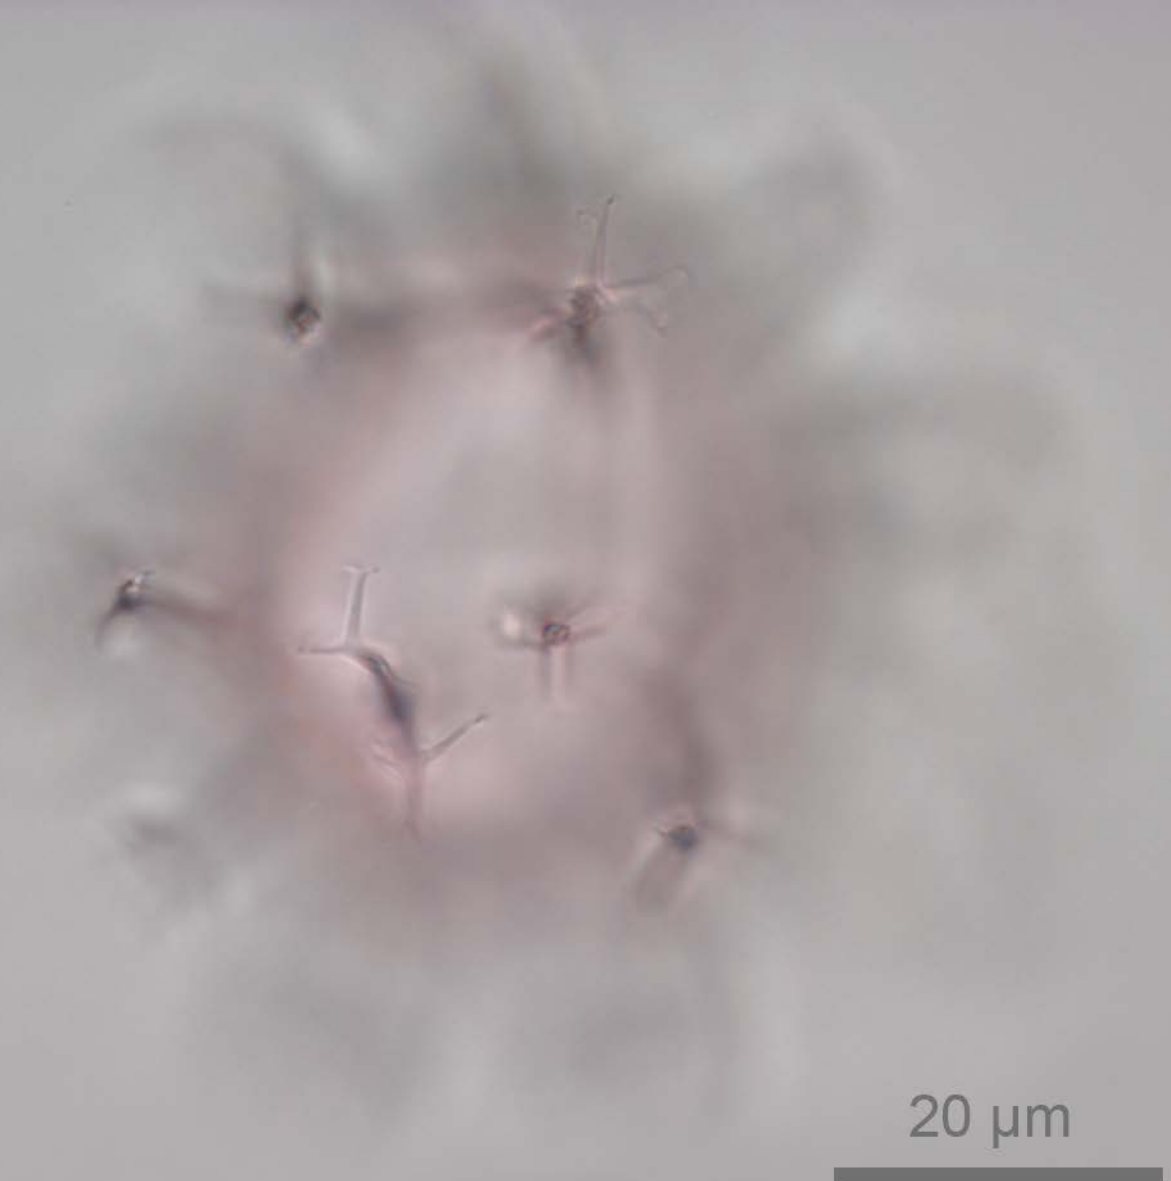

*Spiniferites rhizophorus* Head  
in Head et Westphal, 1999 : holotype

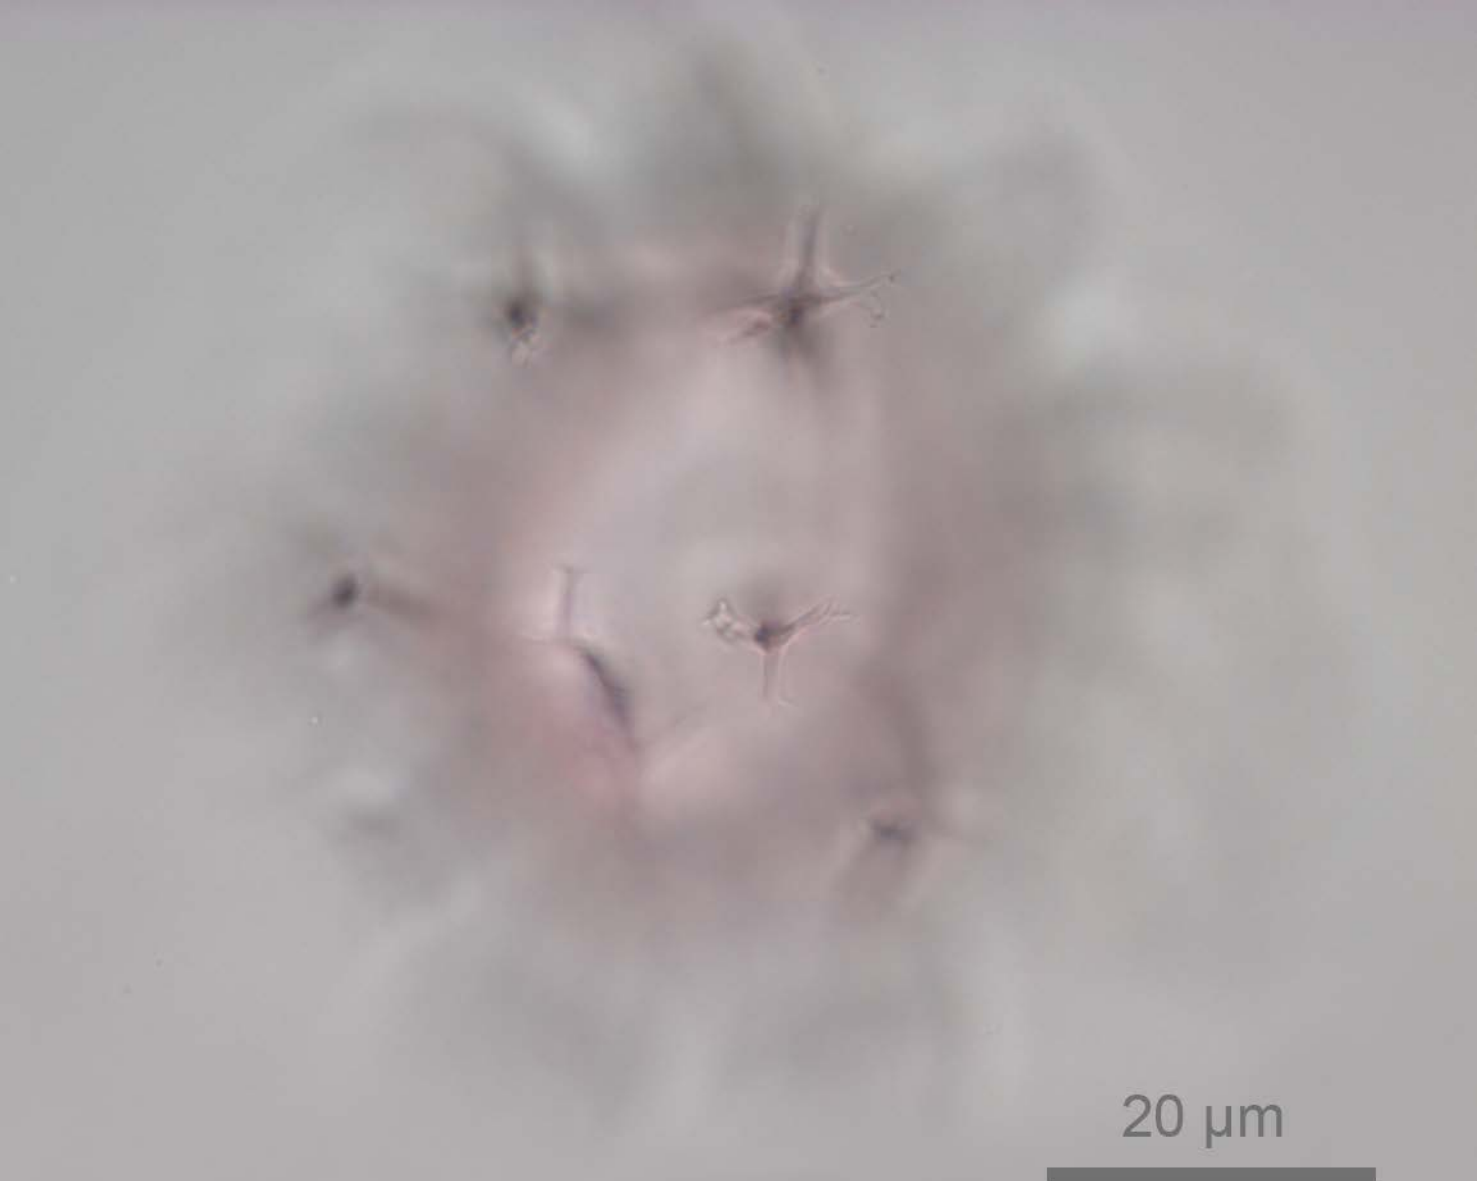

*Spiniferites rhizophorus* Head  
in Head et Westphal, 1999 : holotype

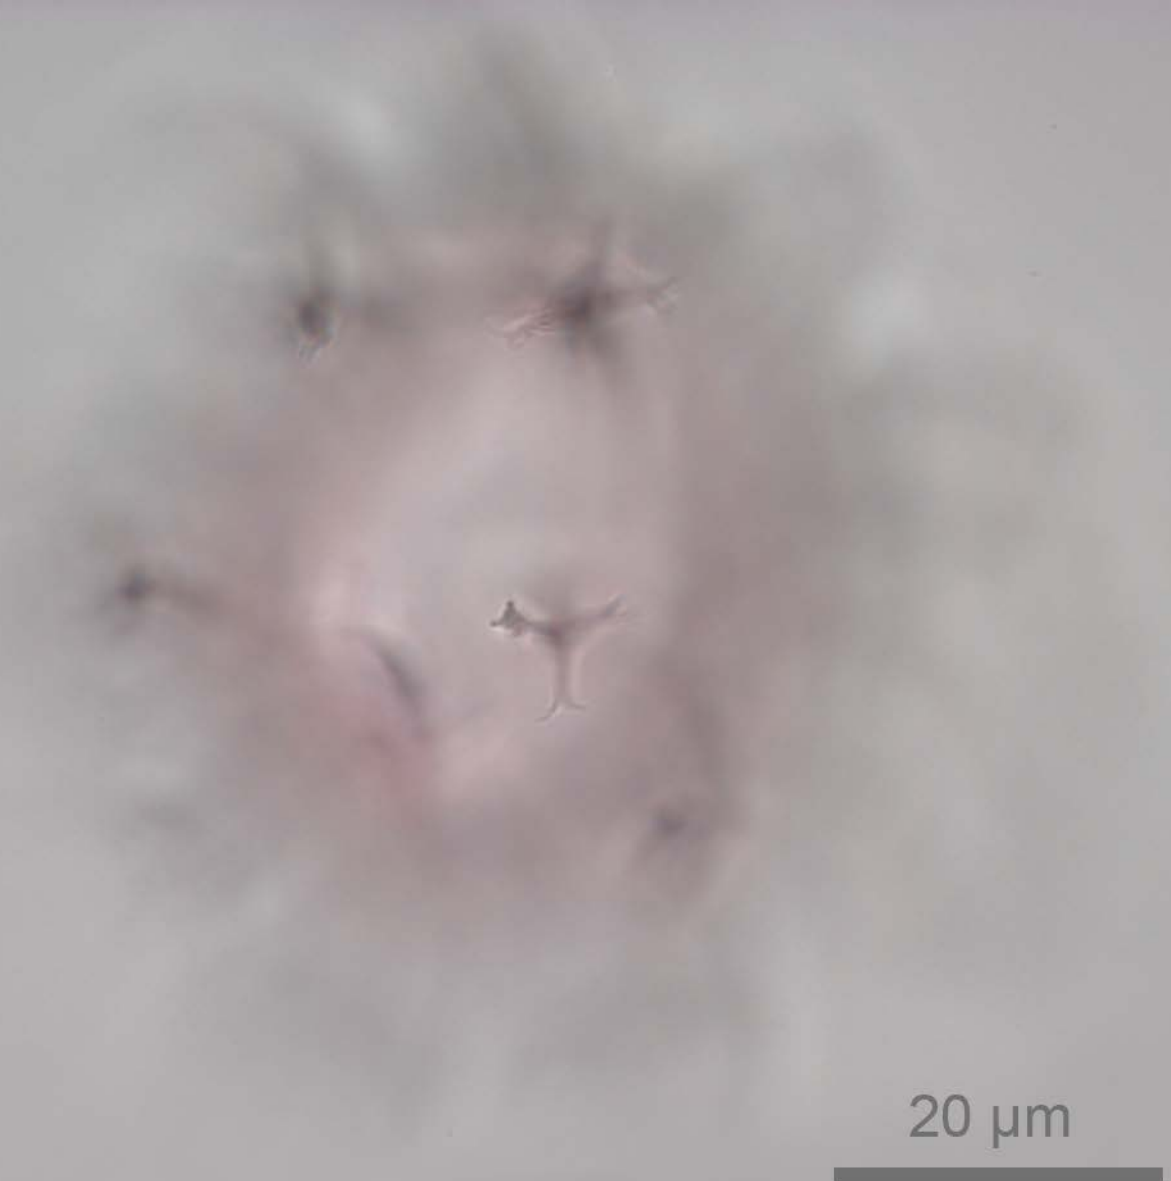

*Spiniferites rhizophorus* Head  
in Head et Westphal, 1999 : holotype
