# Supplementary material
Source: publisher figshare collection journal article supplement (https://tandf.figshare.com/articles/dataset/_/7466618)
Supplement: Supplementary file 13 [file 1]

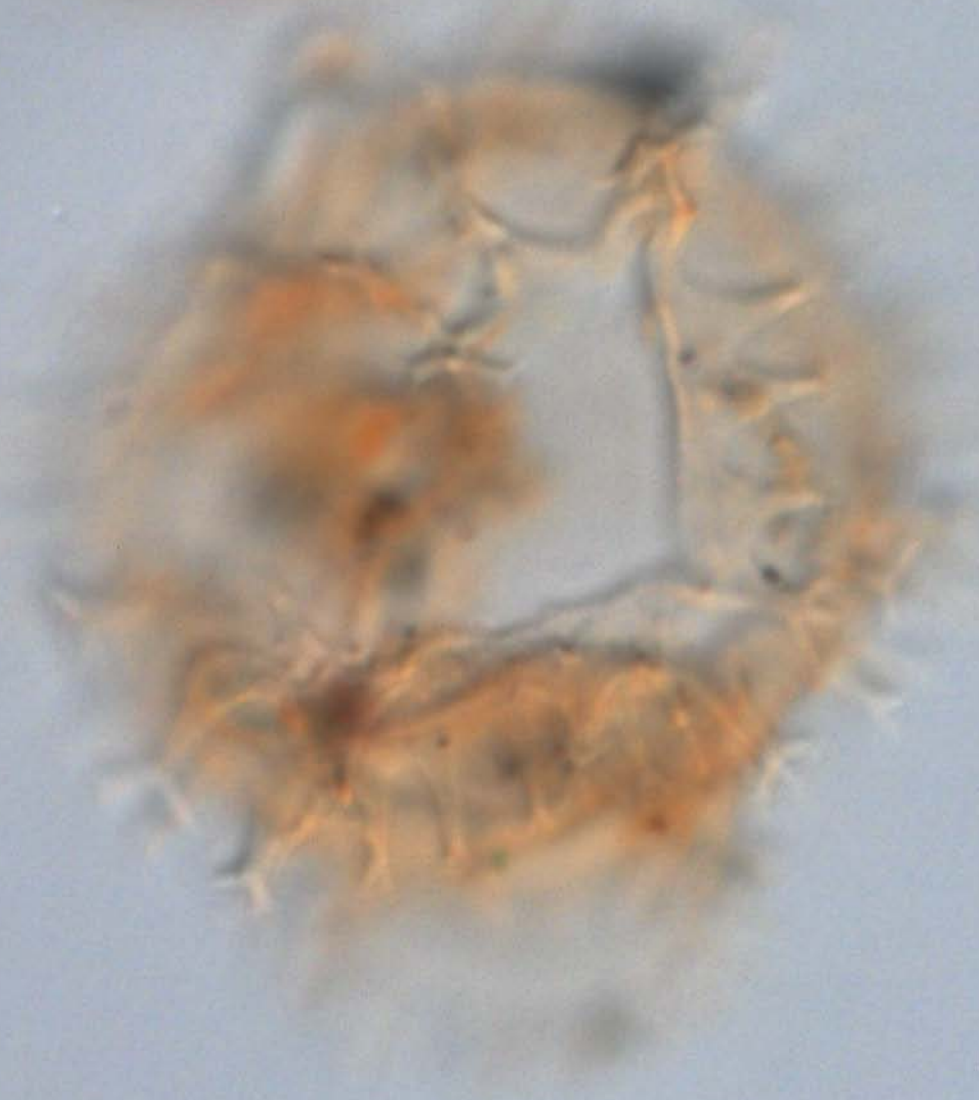

20  $\mu\text{m}$

---

*Spiniferites serratus* Matsuoka 1983 : holotype

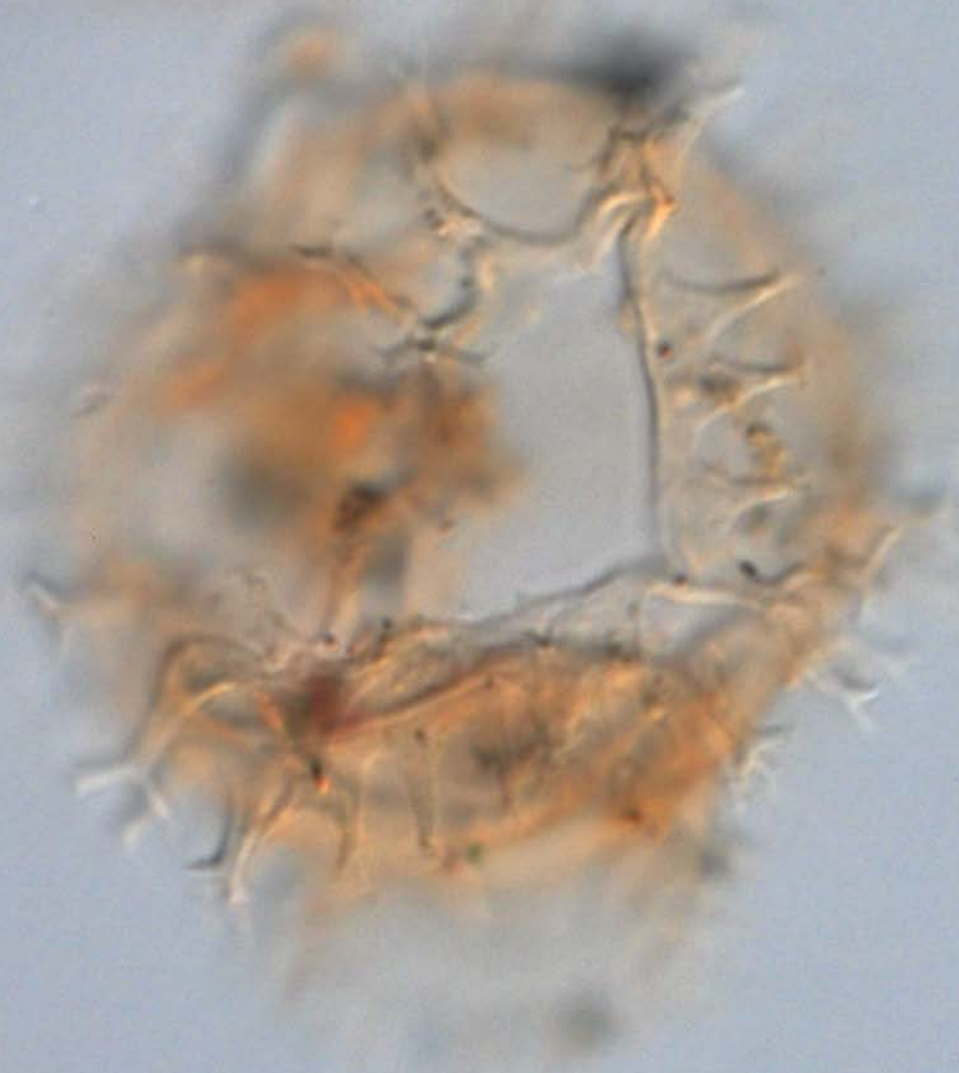

20  $\mu\text{m}$

*Spiniferites serratus* Matsuoka 1983 : holotype



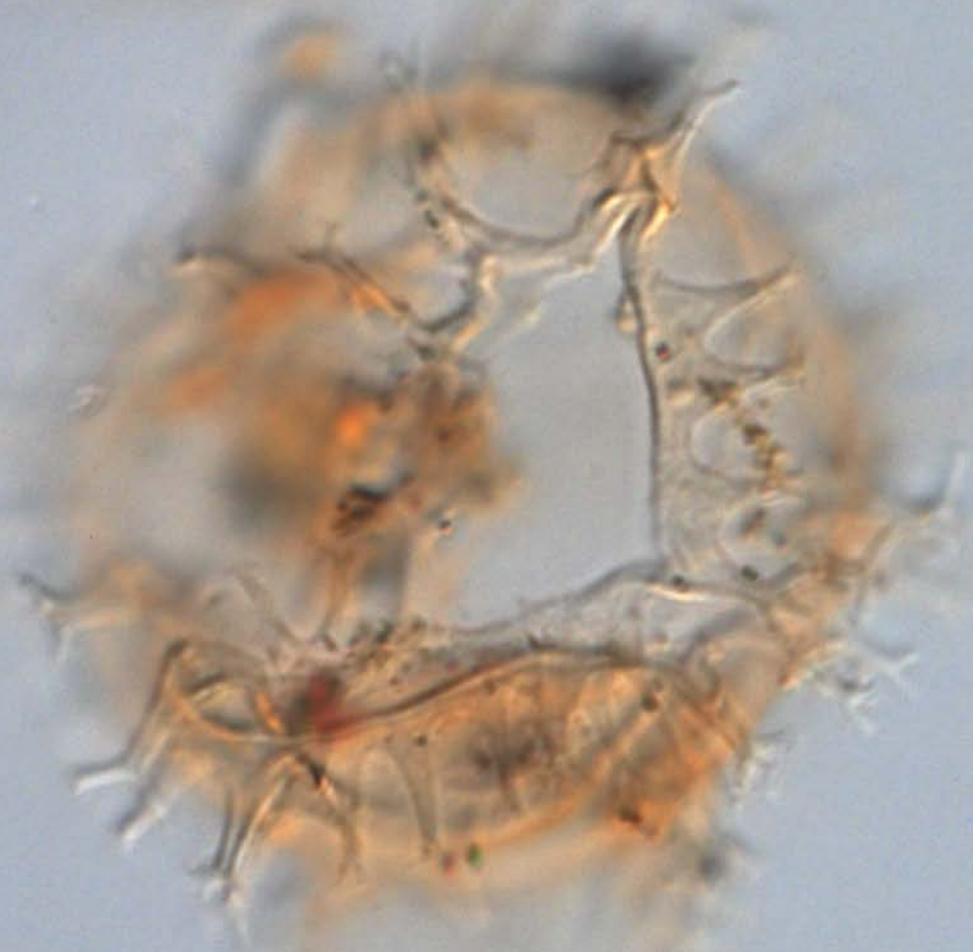

20  $\mu\text{m}$

---

*Spiniferites serratus* Matsuoka 1983 : holotype

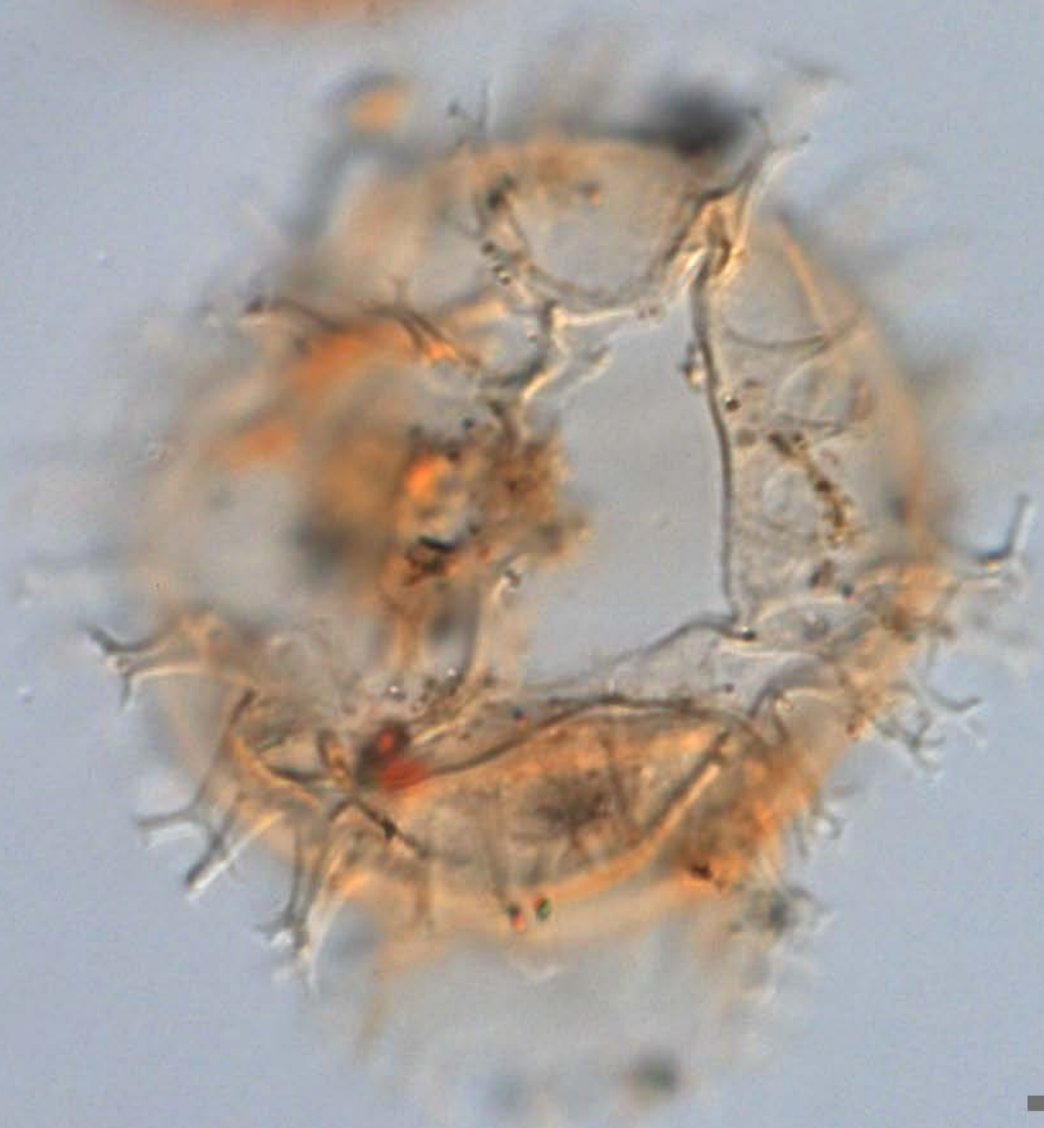

20  $\mu\text{m}$

*Spiniferites serratus* Matsuoka 1983 : holotype



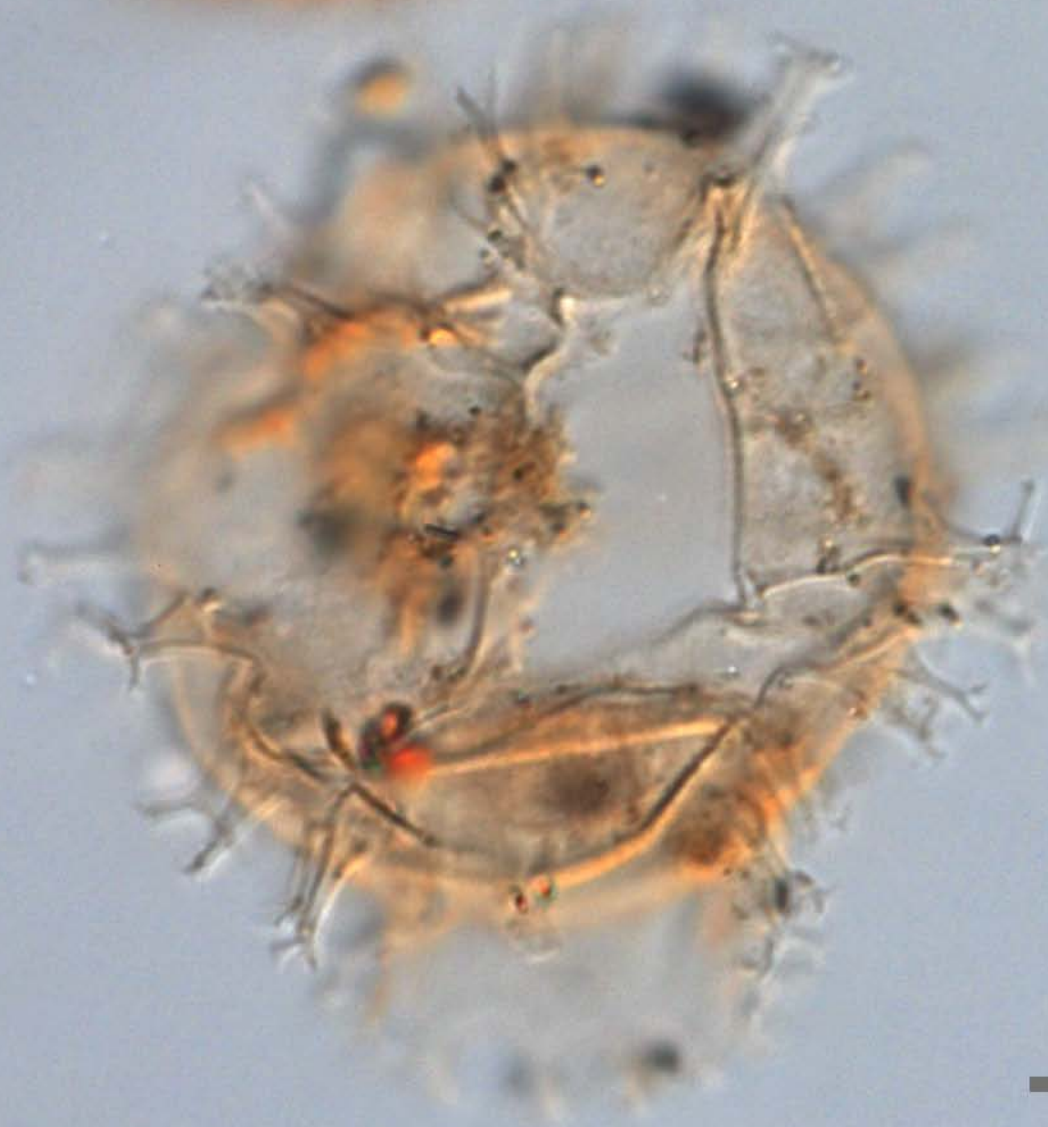

20  $\mu\text{m}$

---

*Spiniferites serratus* Matsuoka 1983 : holotype

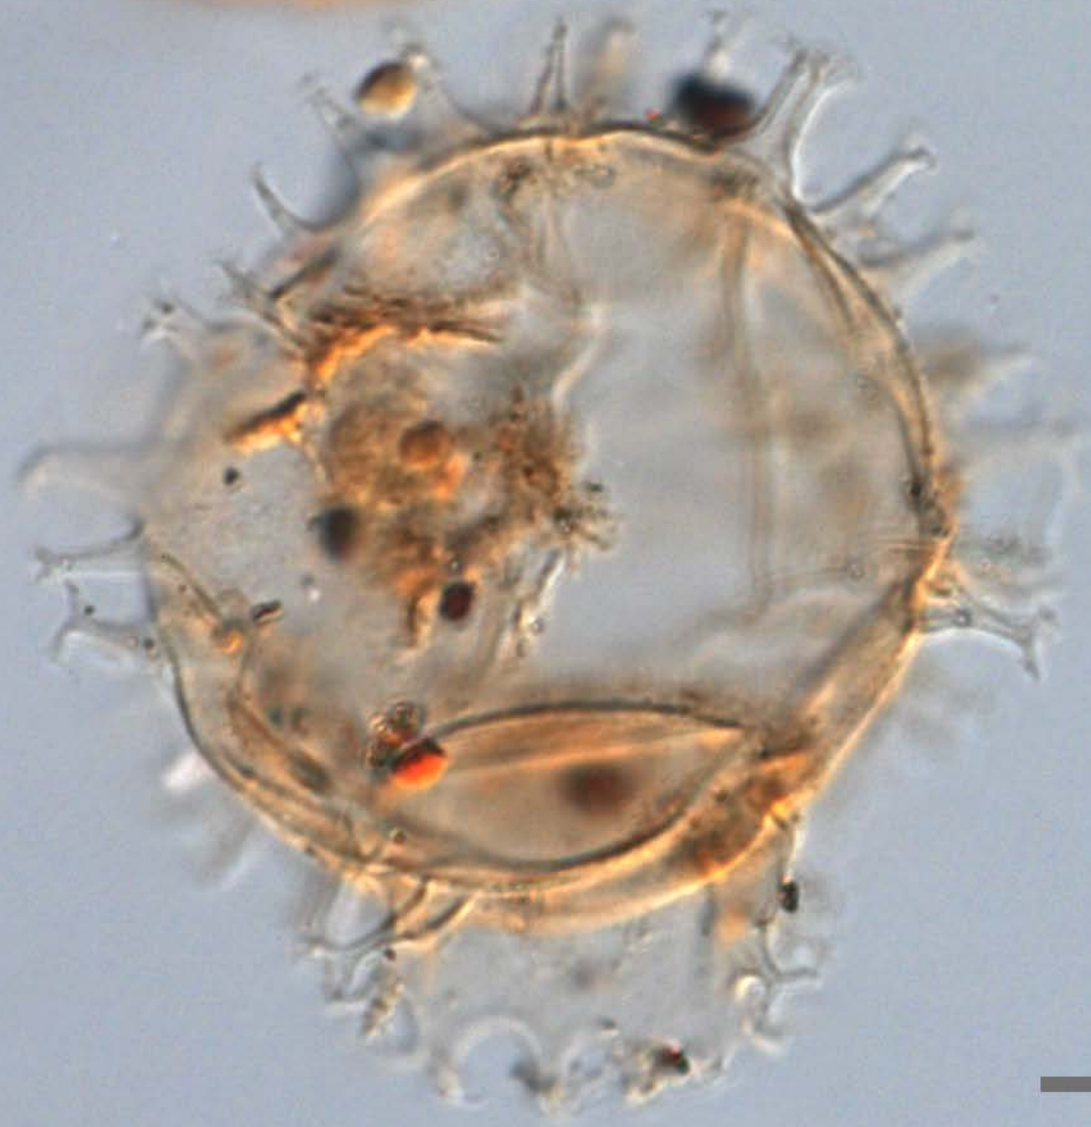

20  $\mu\text{m}$

*Spiniferites serratus* Matsuoka 1983 : holotype



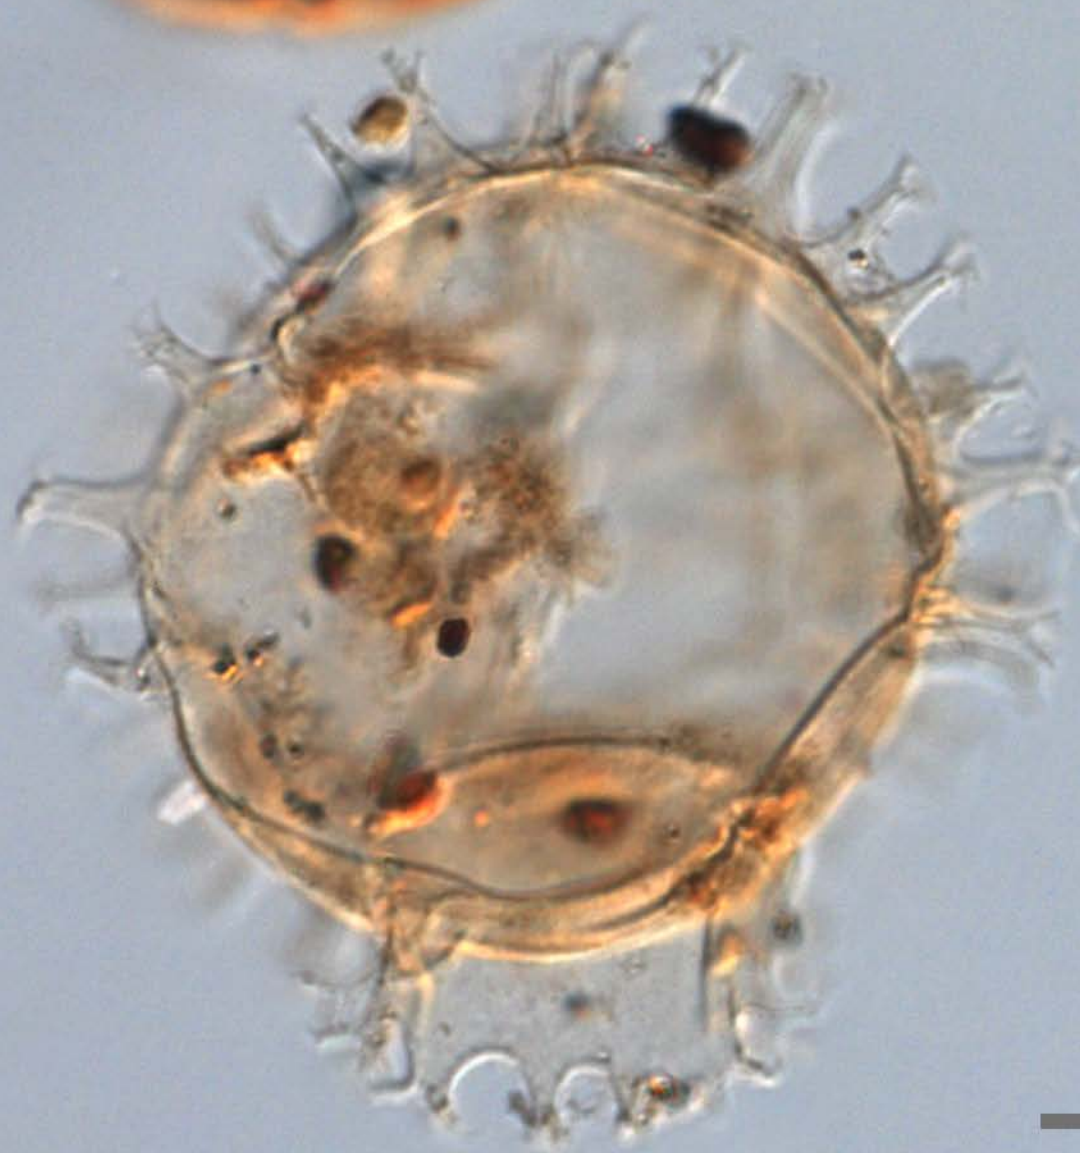

20 μm

*Spiniferites serratus* Matsuoka 1983 : holotype

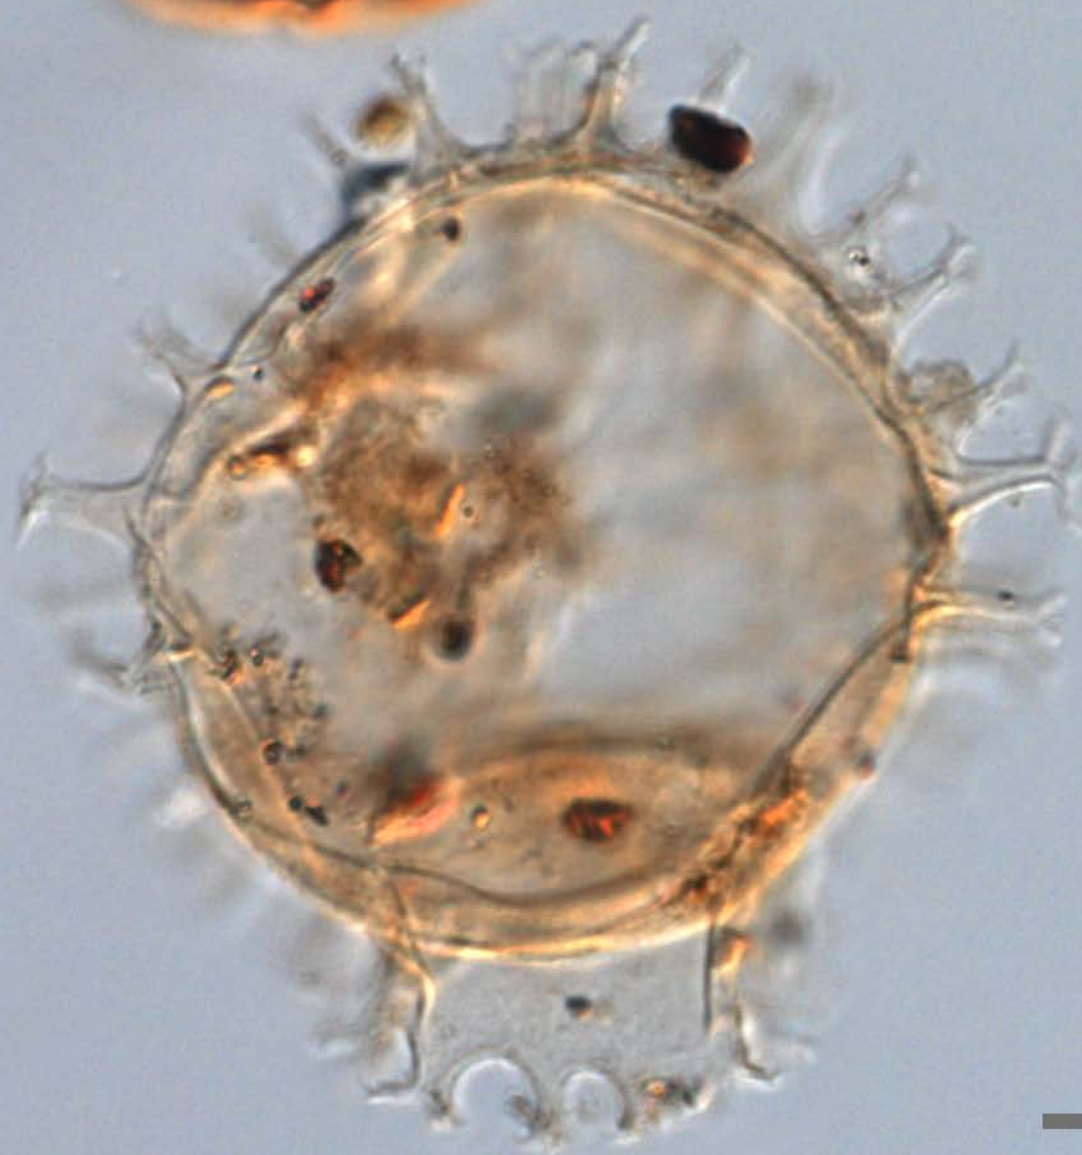

20  $\mu\text{m}$

*Spiniferites serratus* Matsuoka 1983 : holotype



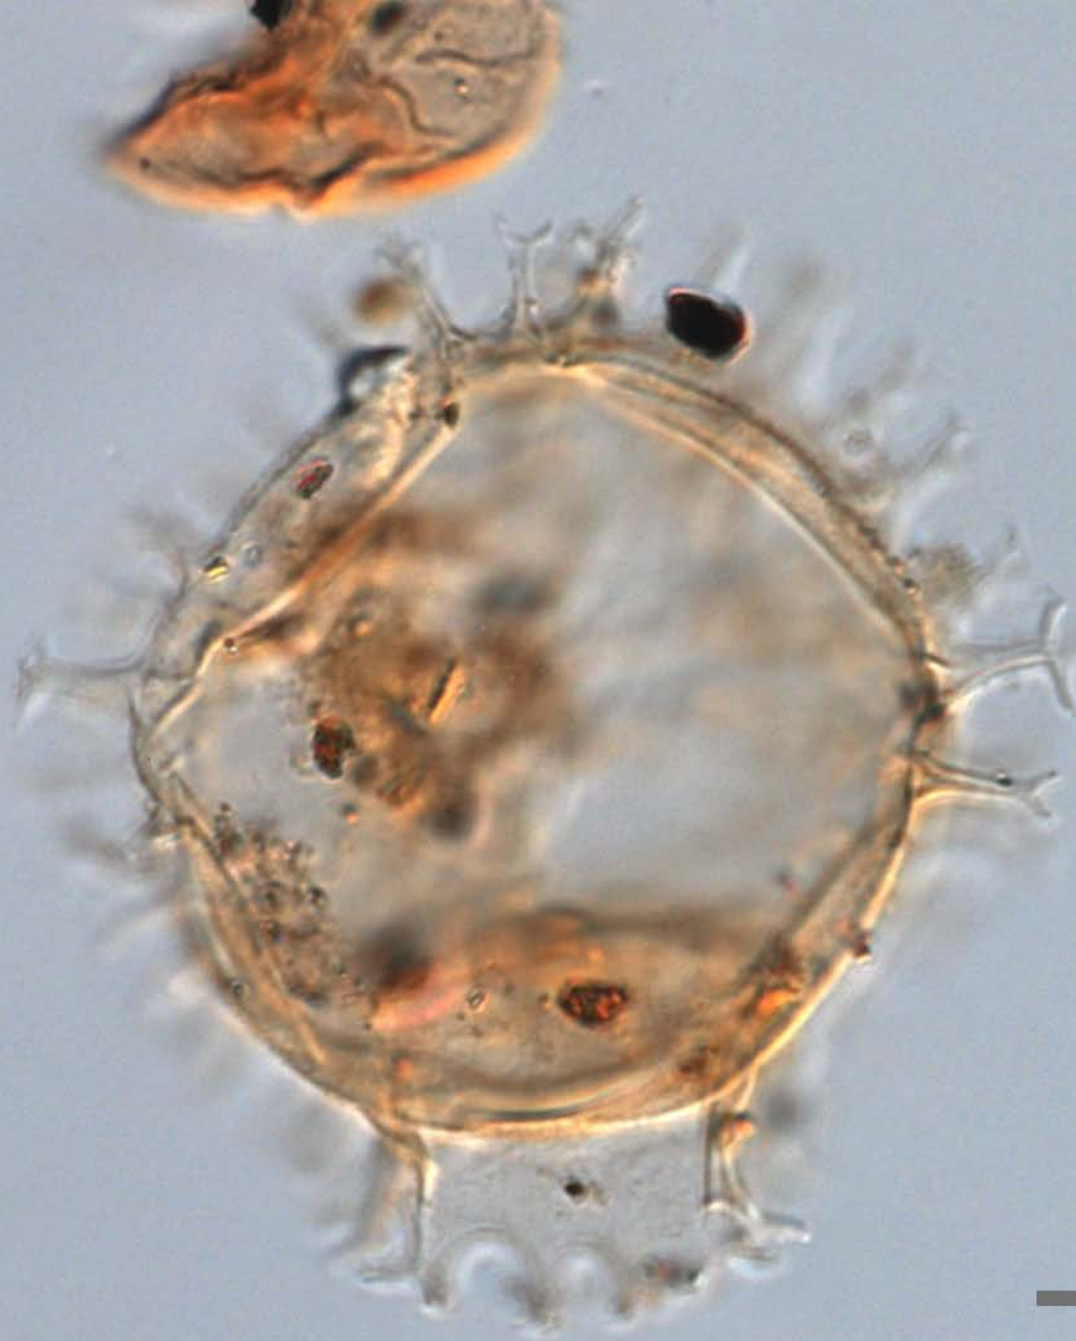

20  $\mu\text{m}$

*Spiniferites serratus* Matsuoka 1983 : holotype

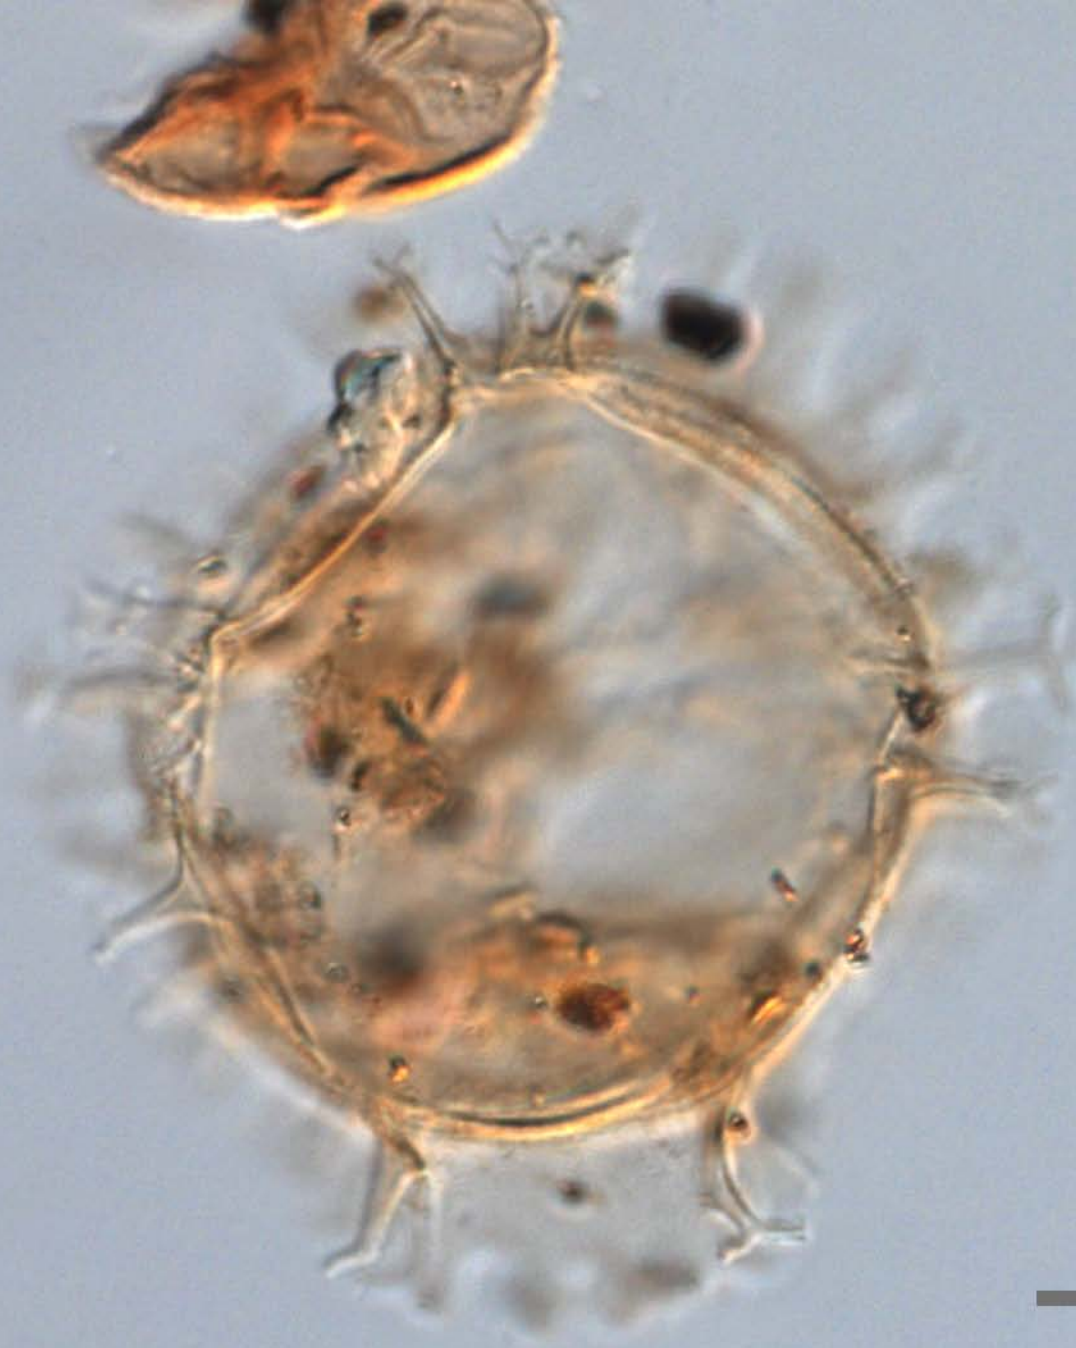

20  $\mu\text{m}$

*Spiniferites serratus* Matsuoka 1983 : holotype



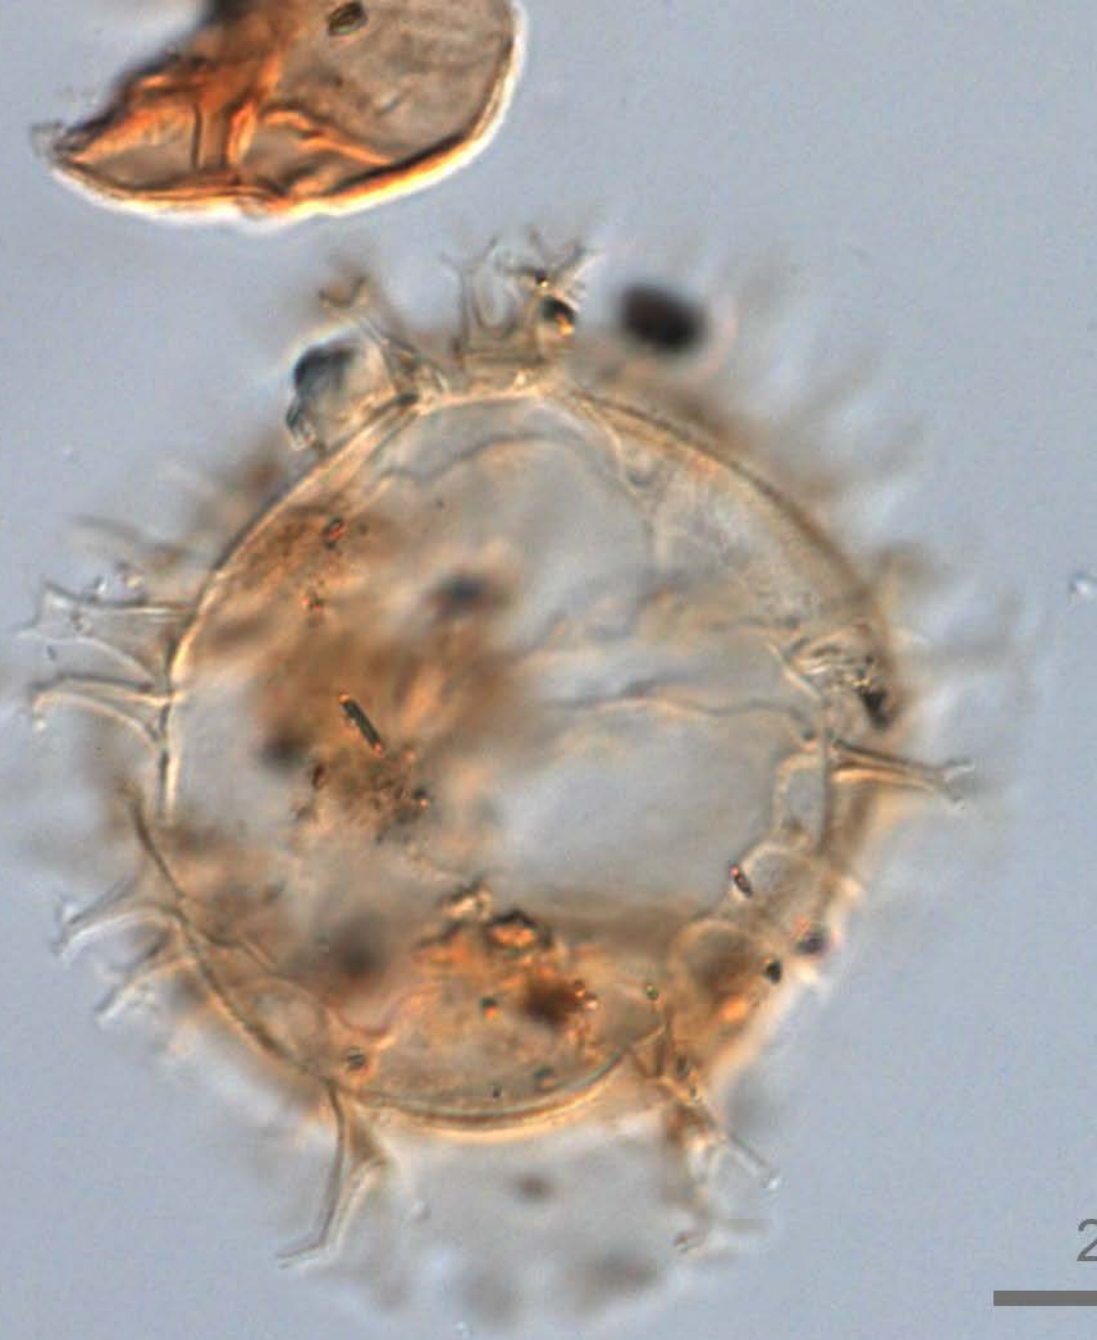

20 μm

*Spiniferites serratus* Matsuoka 1983 : holotype

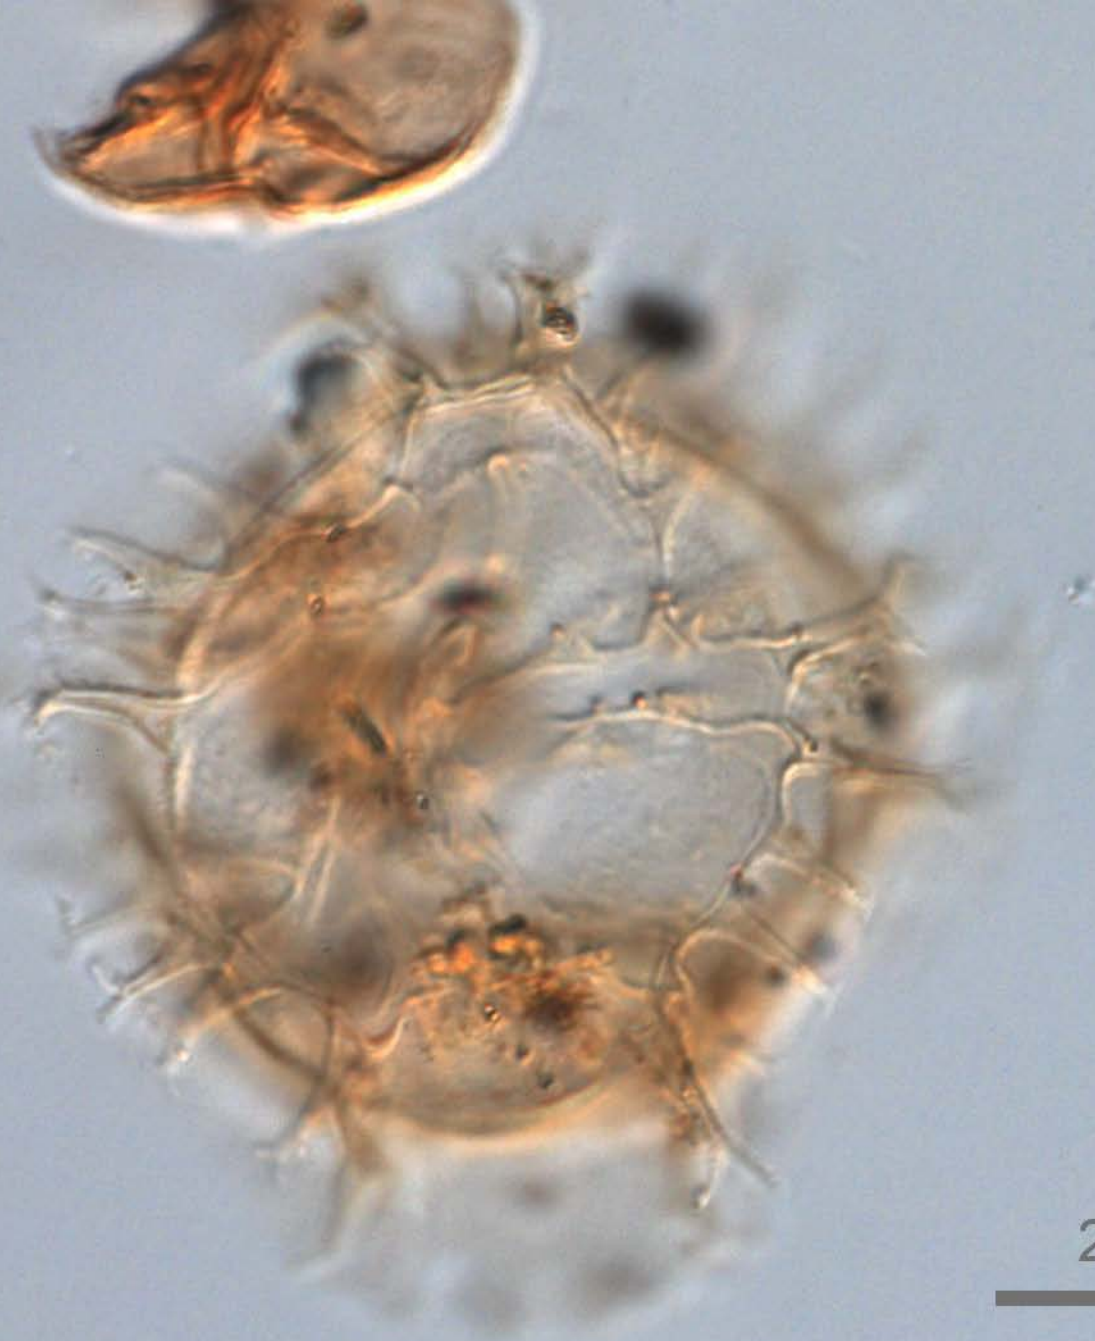

*Spiniferites serratus* Matsuoka 1983 : holotype



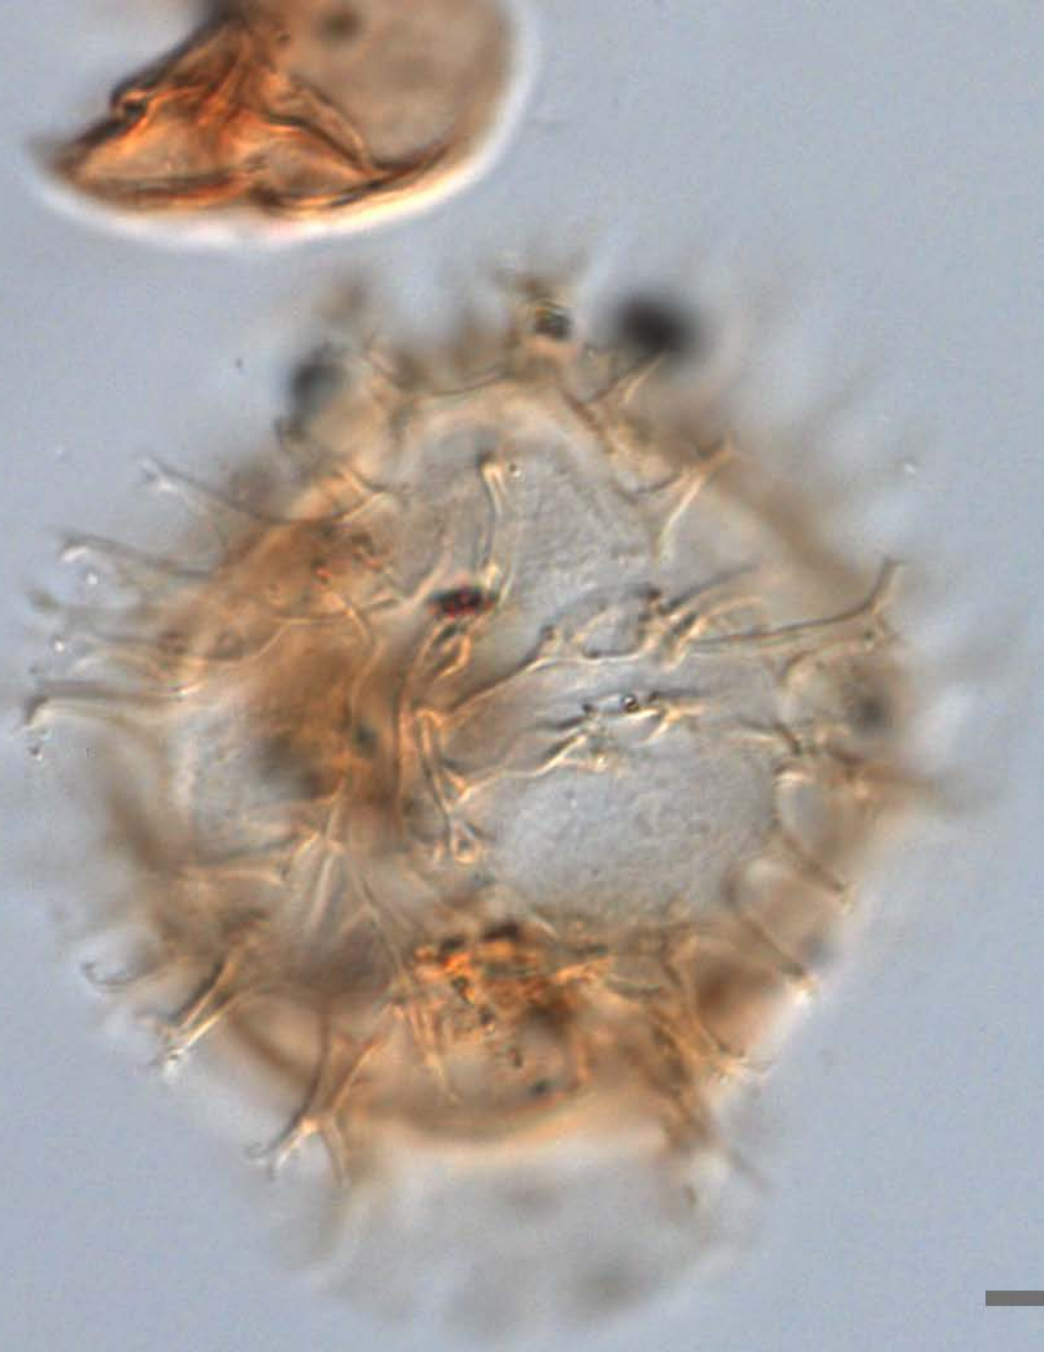

20  $\mu\text{m}$

*Spiniferites serratus* Matsuoka 1983 : holotype

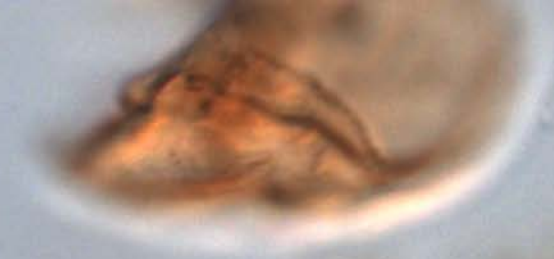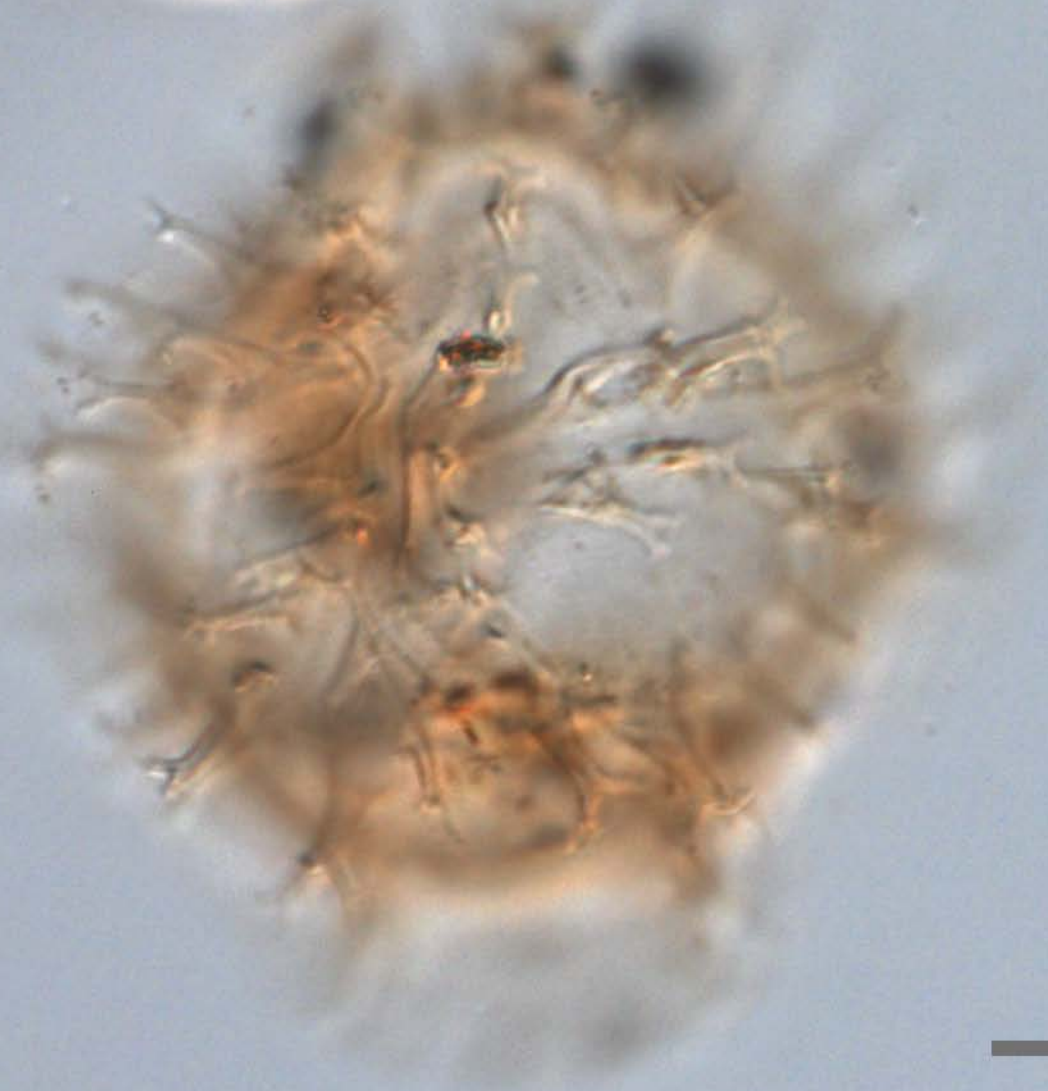

20  $\mu\text{m}$

*Spiniferites serratus* Matsuoka 1983 : holotype



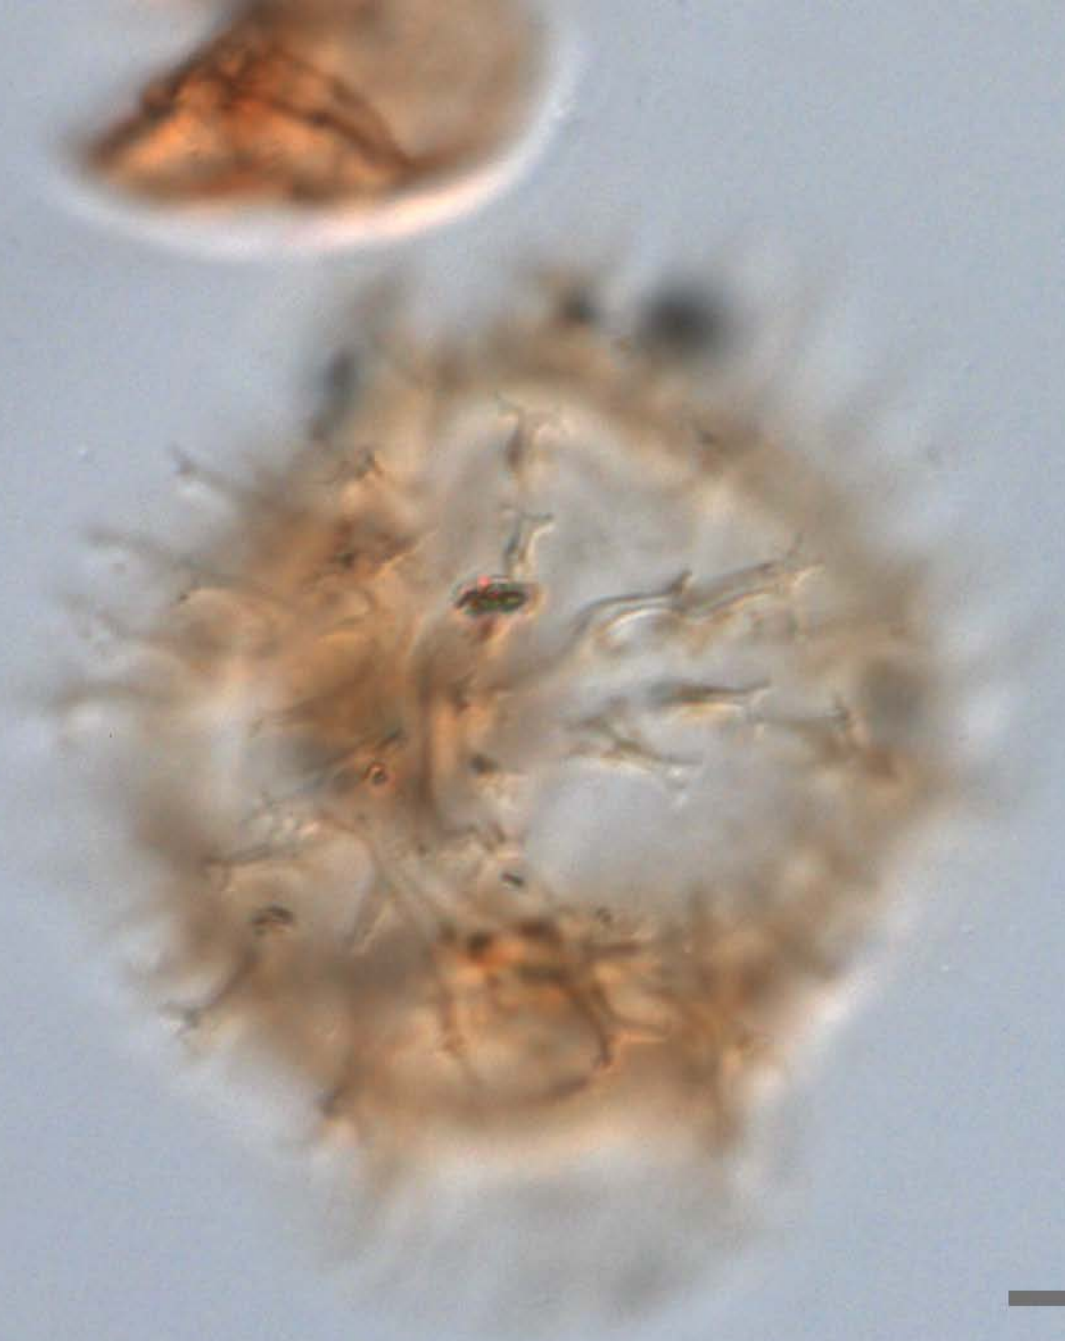

20  $\mu\text{m}$

*Spiniferites serratus* Matsuoka 1983 : holotype

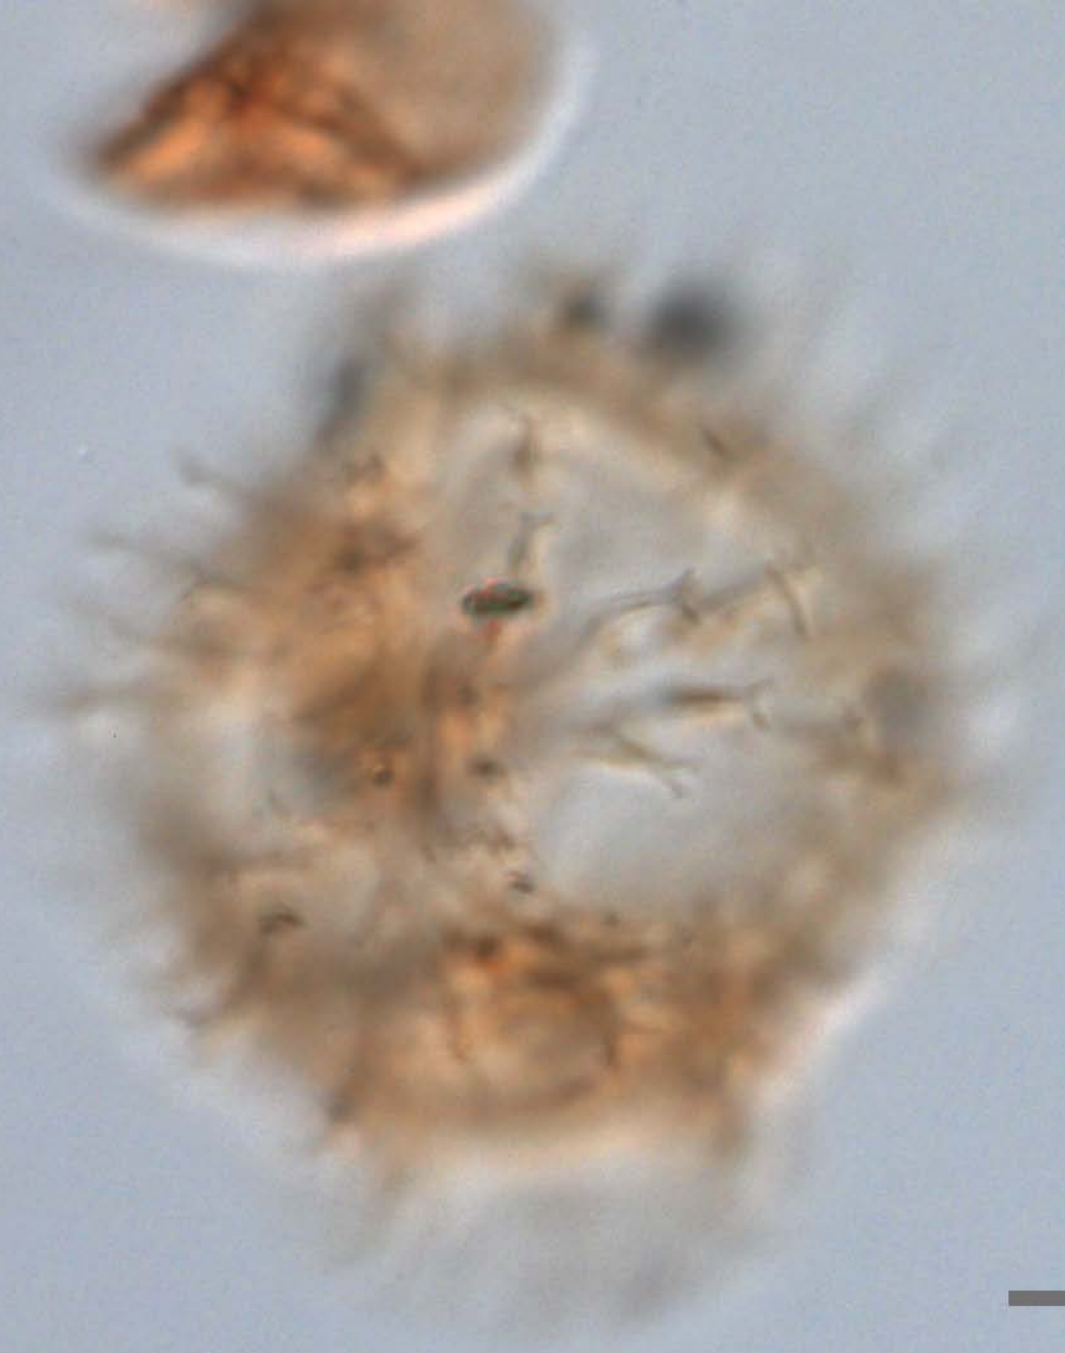

20 μm

*Spiniferites serratus* Matsuoka 1983 : holotype
