# Supplementary material
Source: publisher figshare collection journal article supplement (https://tandf.figshare.com/articles/dataset/_/7466618)
Supplement: Supplementary file 14 [file 1]

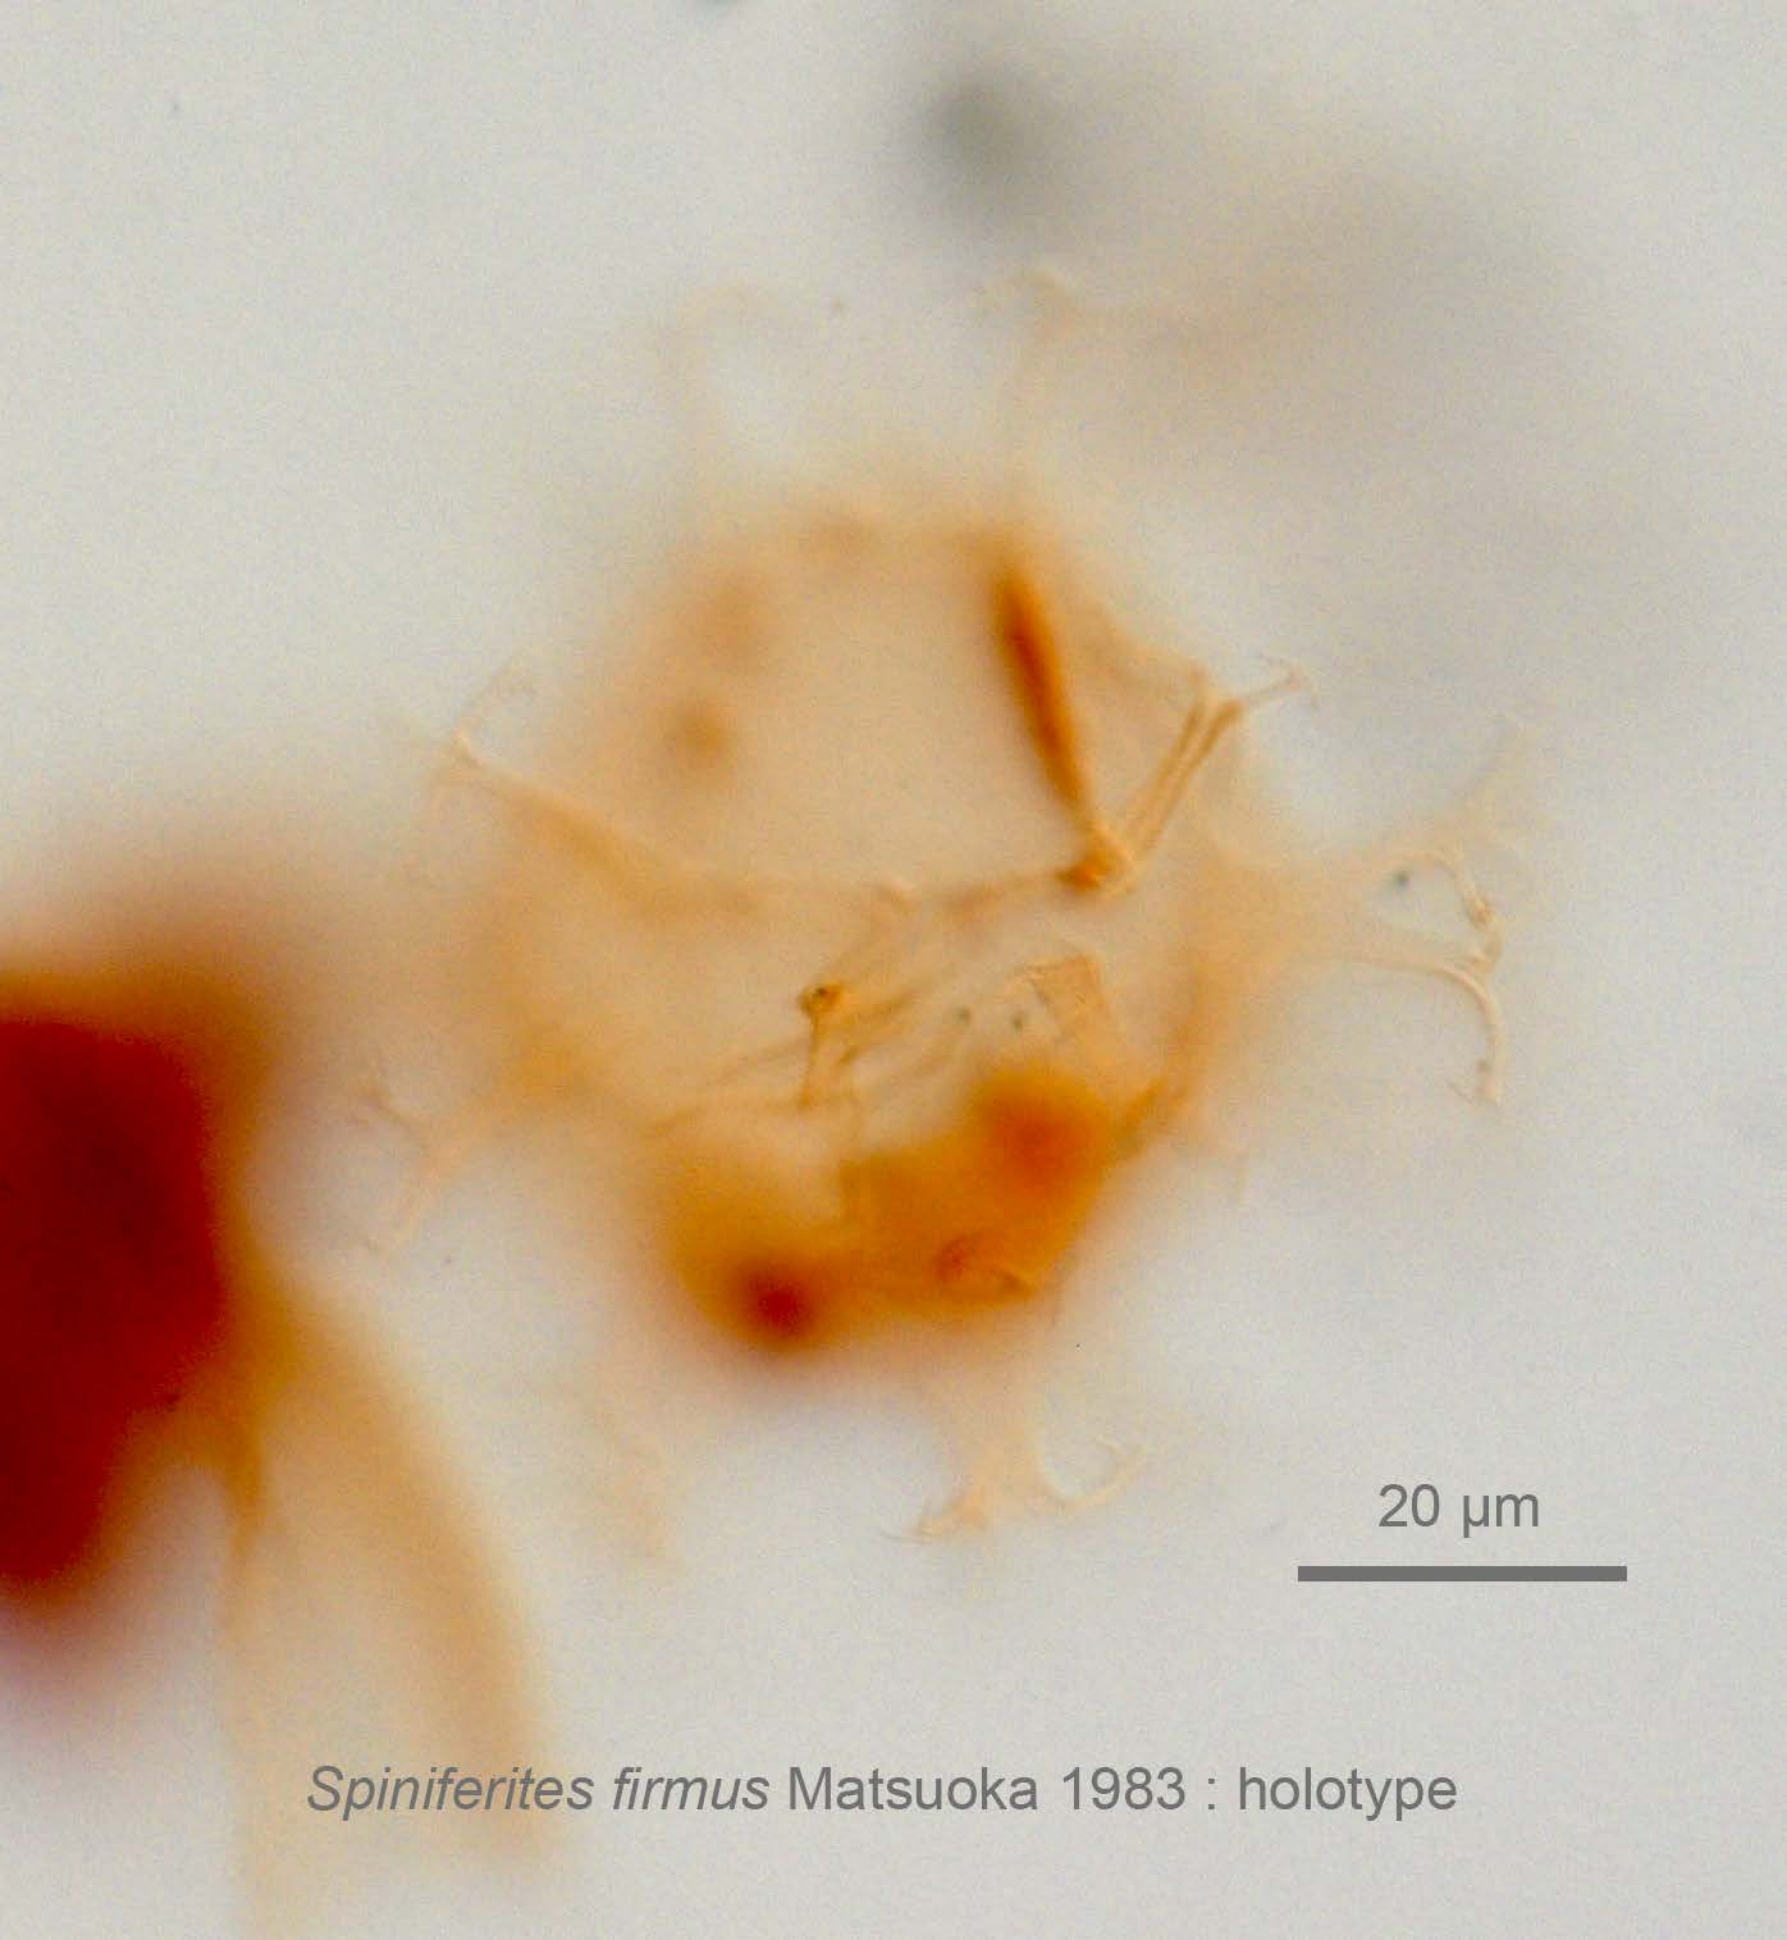

20 μm

*Spiniferites firmus* Matsuoka 1983 : holotype



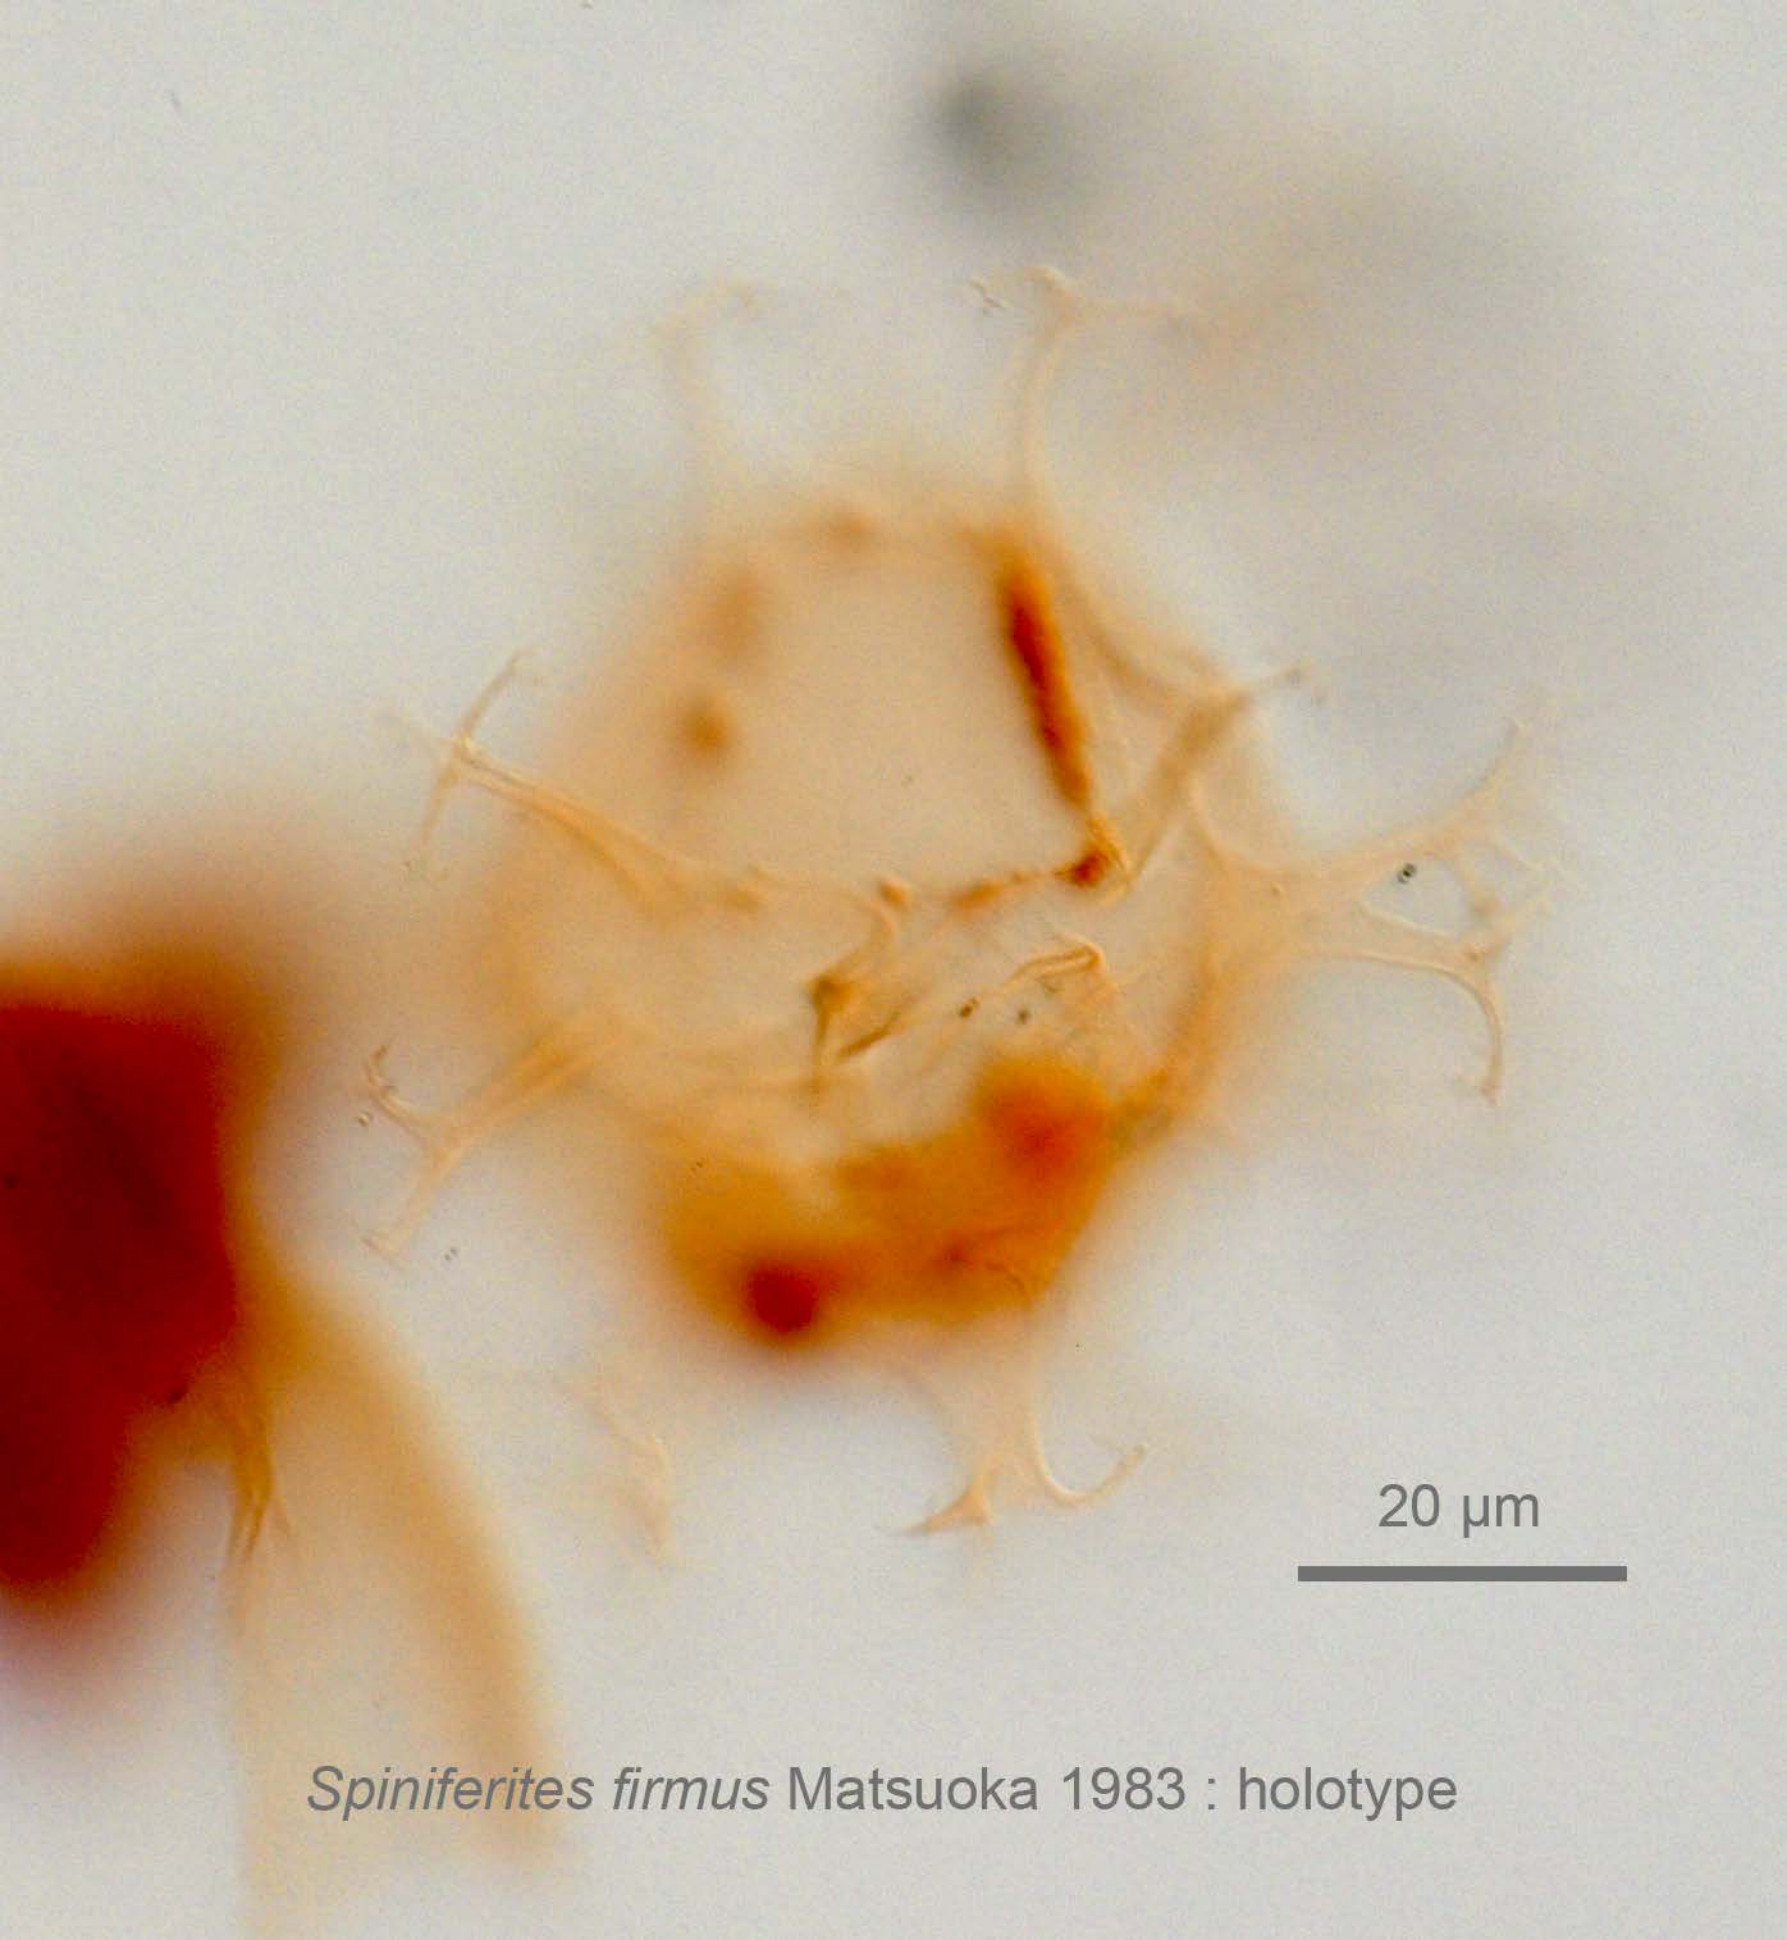

20 μm

*Spiniferites firmus* Matsuoka 1983 : holotype



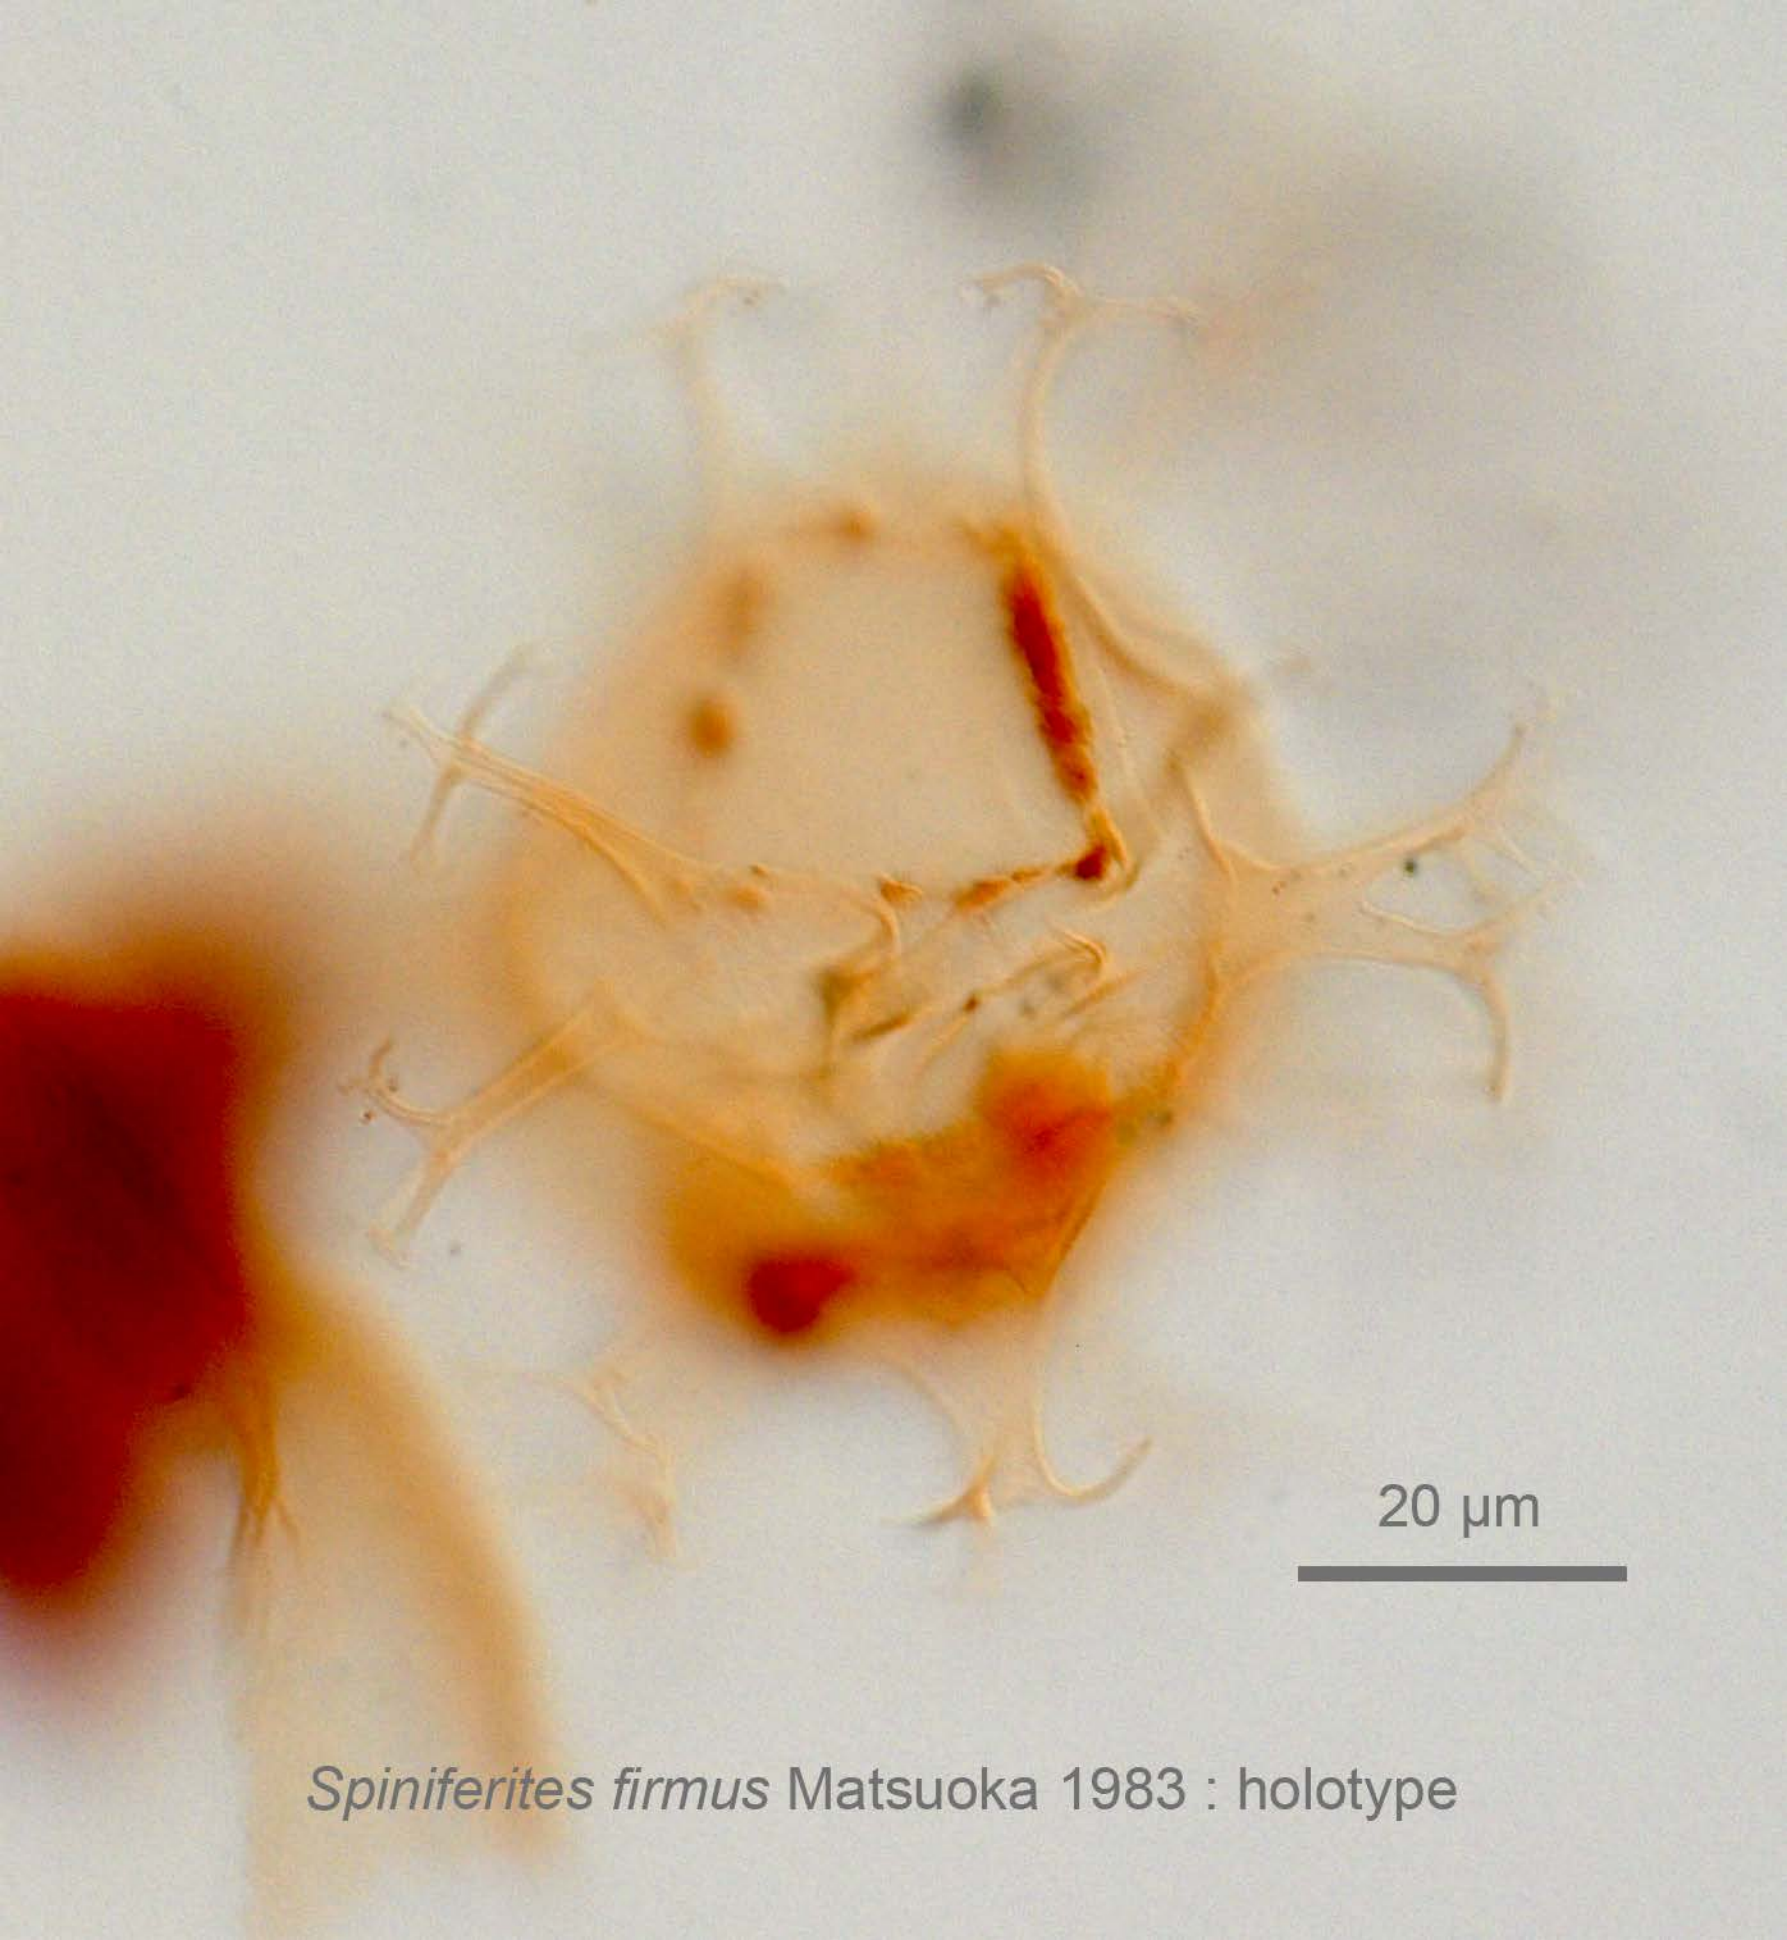

20 μm

*Spiniferites firmus* Matsuoka 1983 : holotype



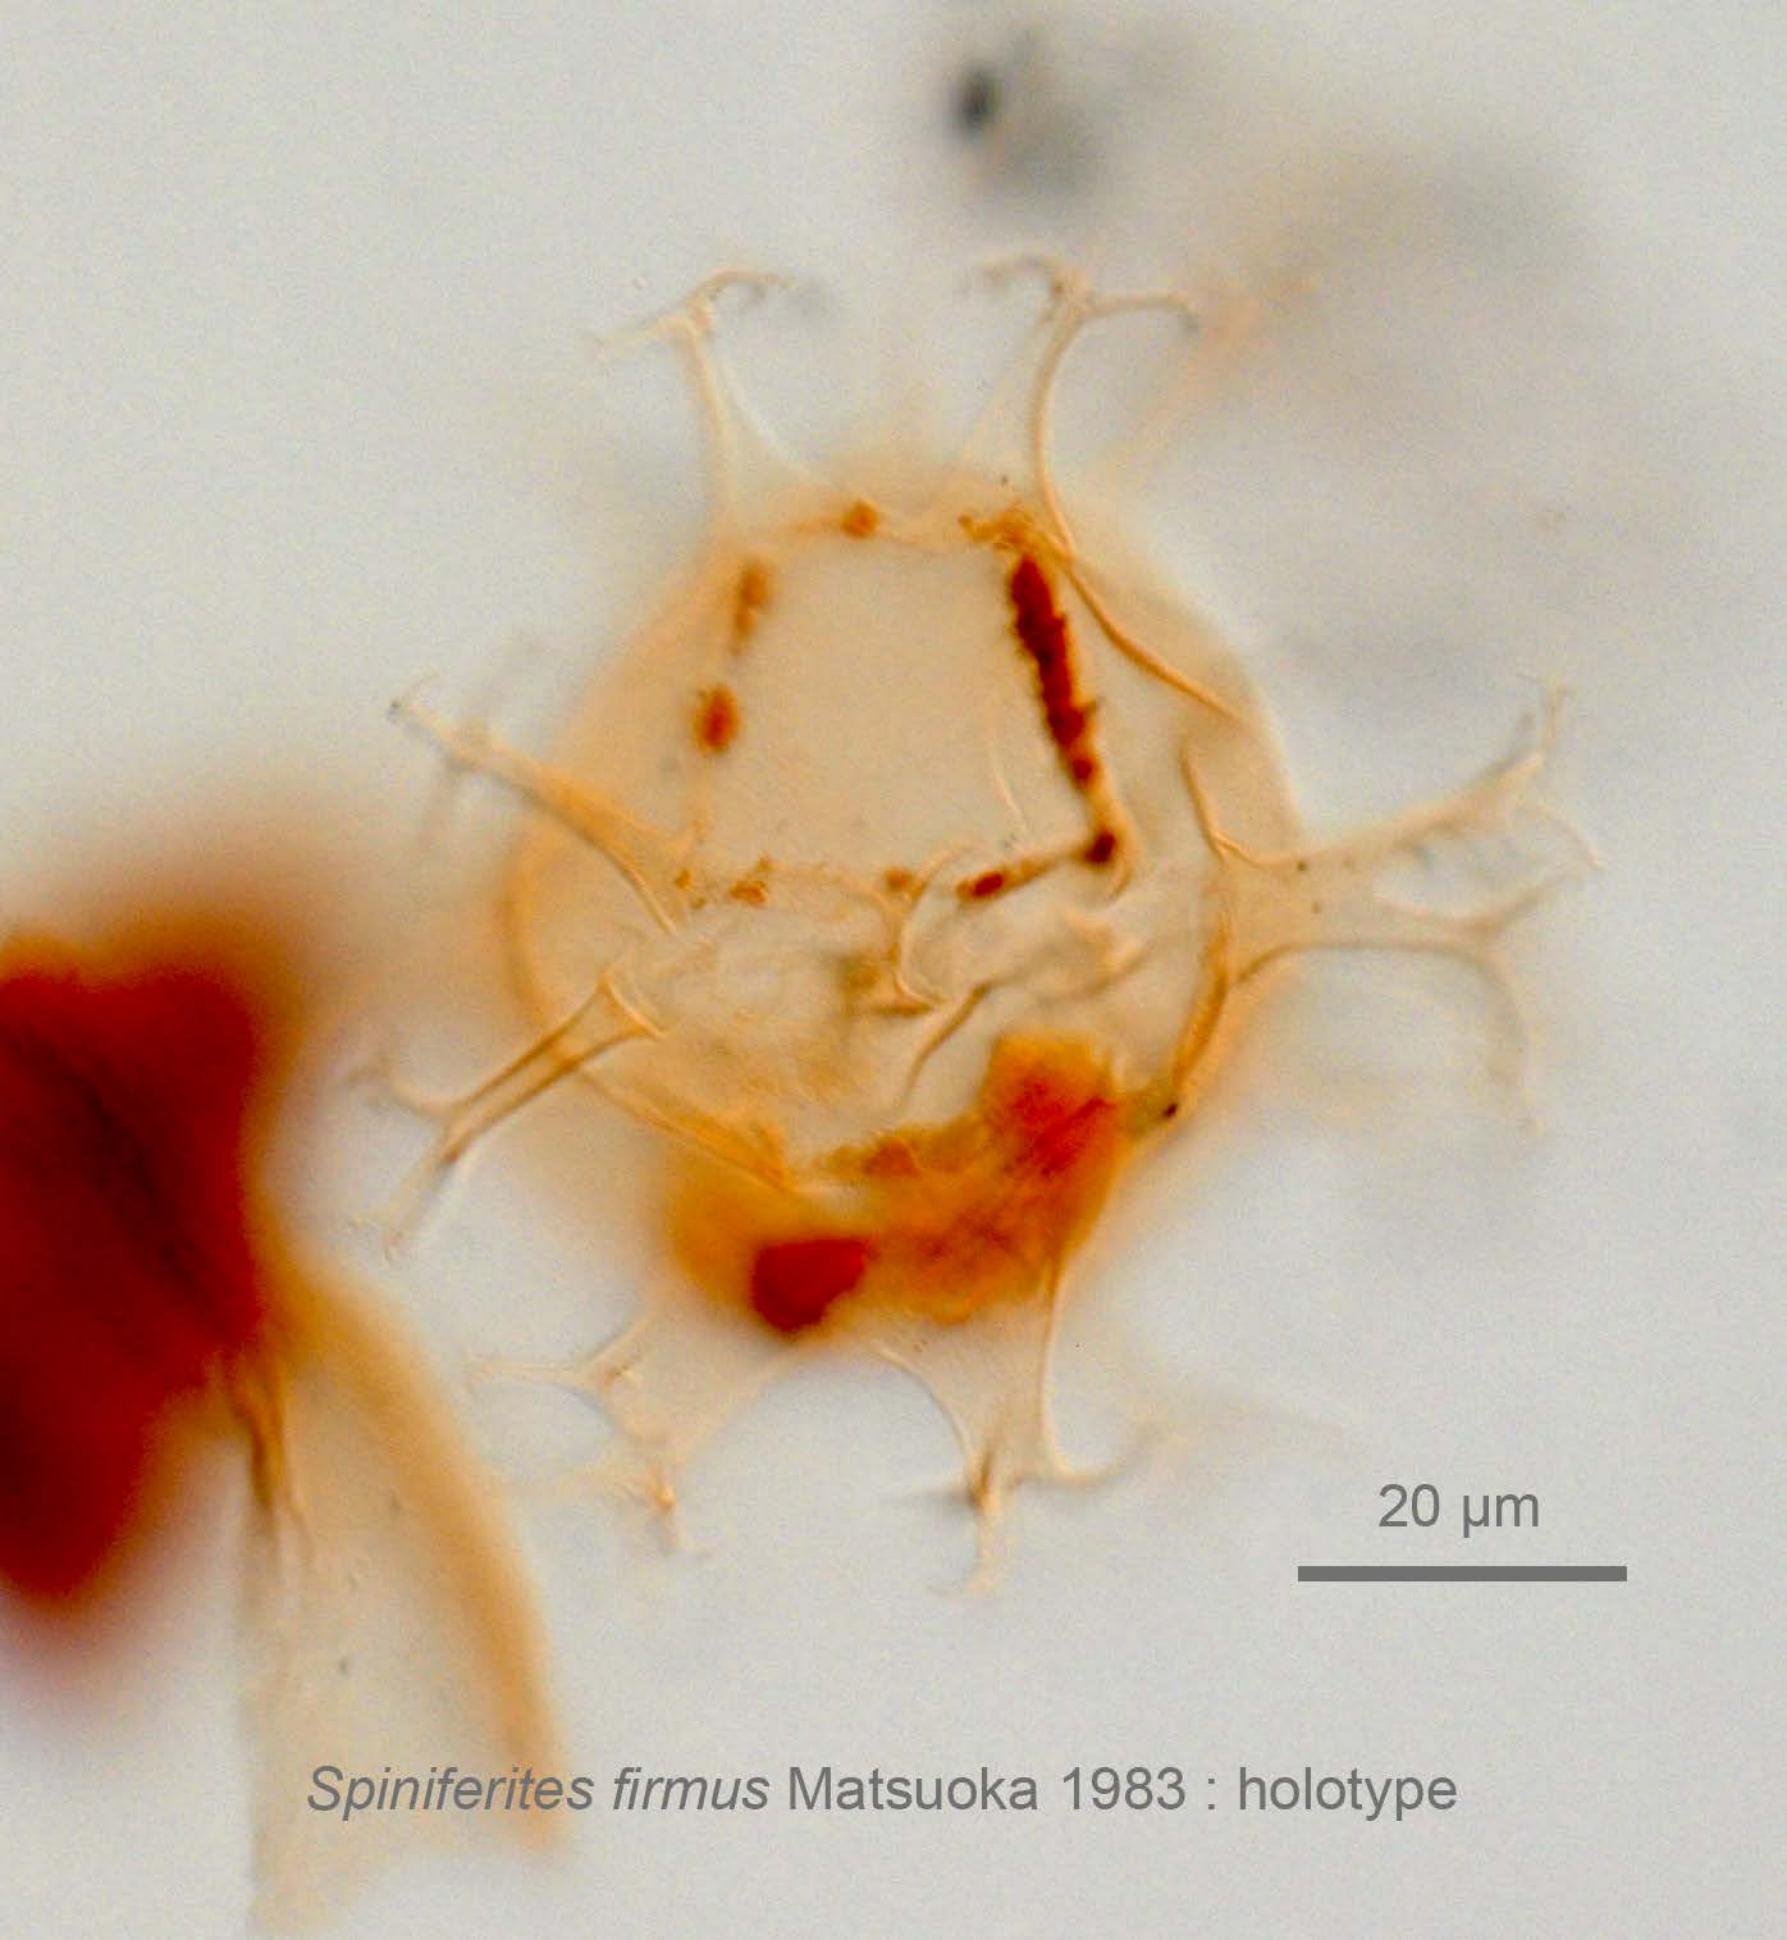

20 μm

*Spiniferites firmus* Matsuoka 1983 : holotype



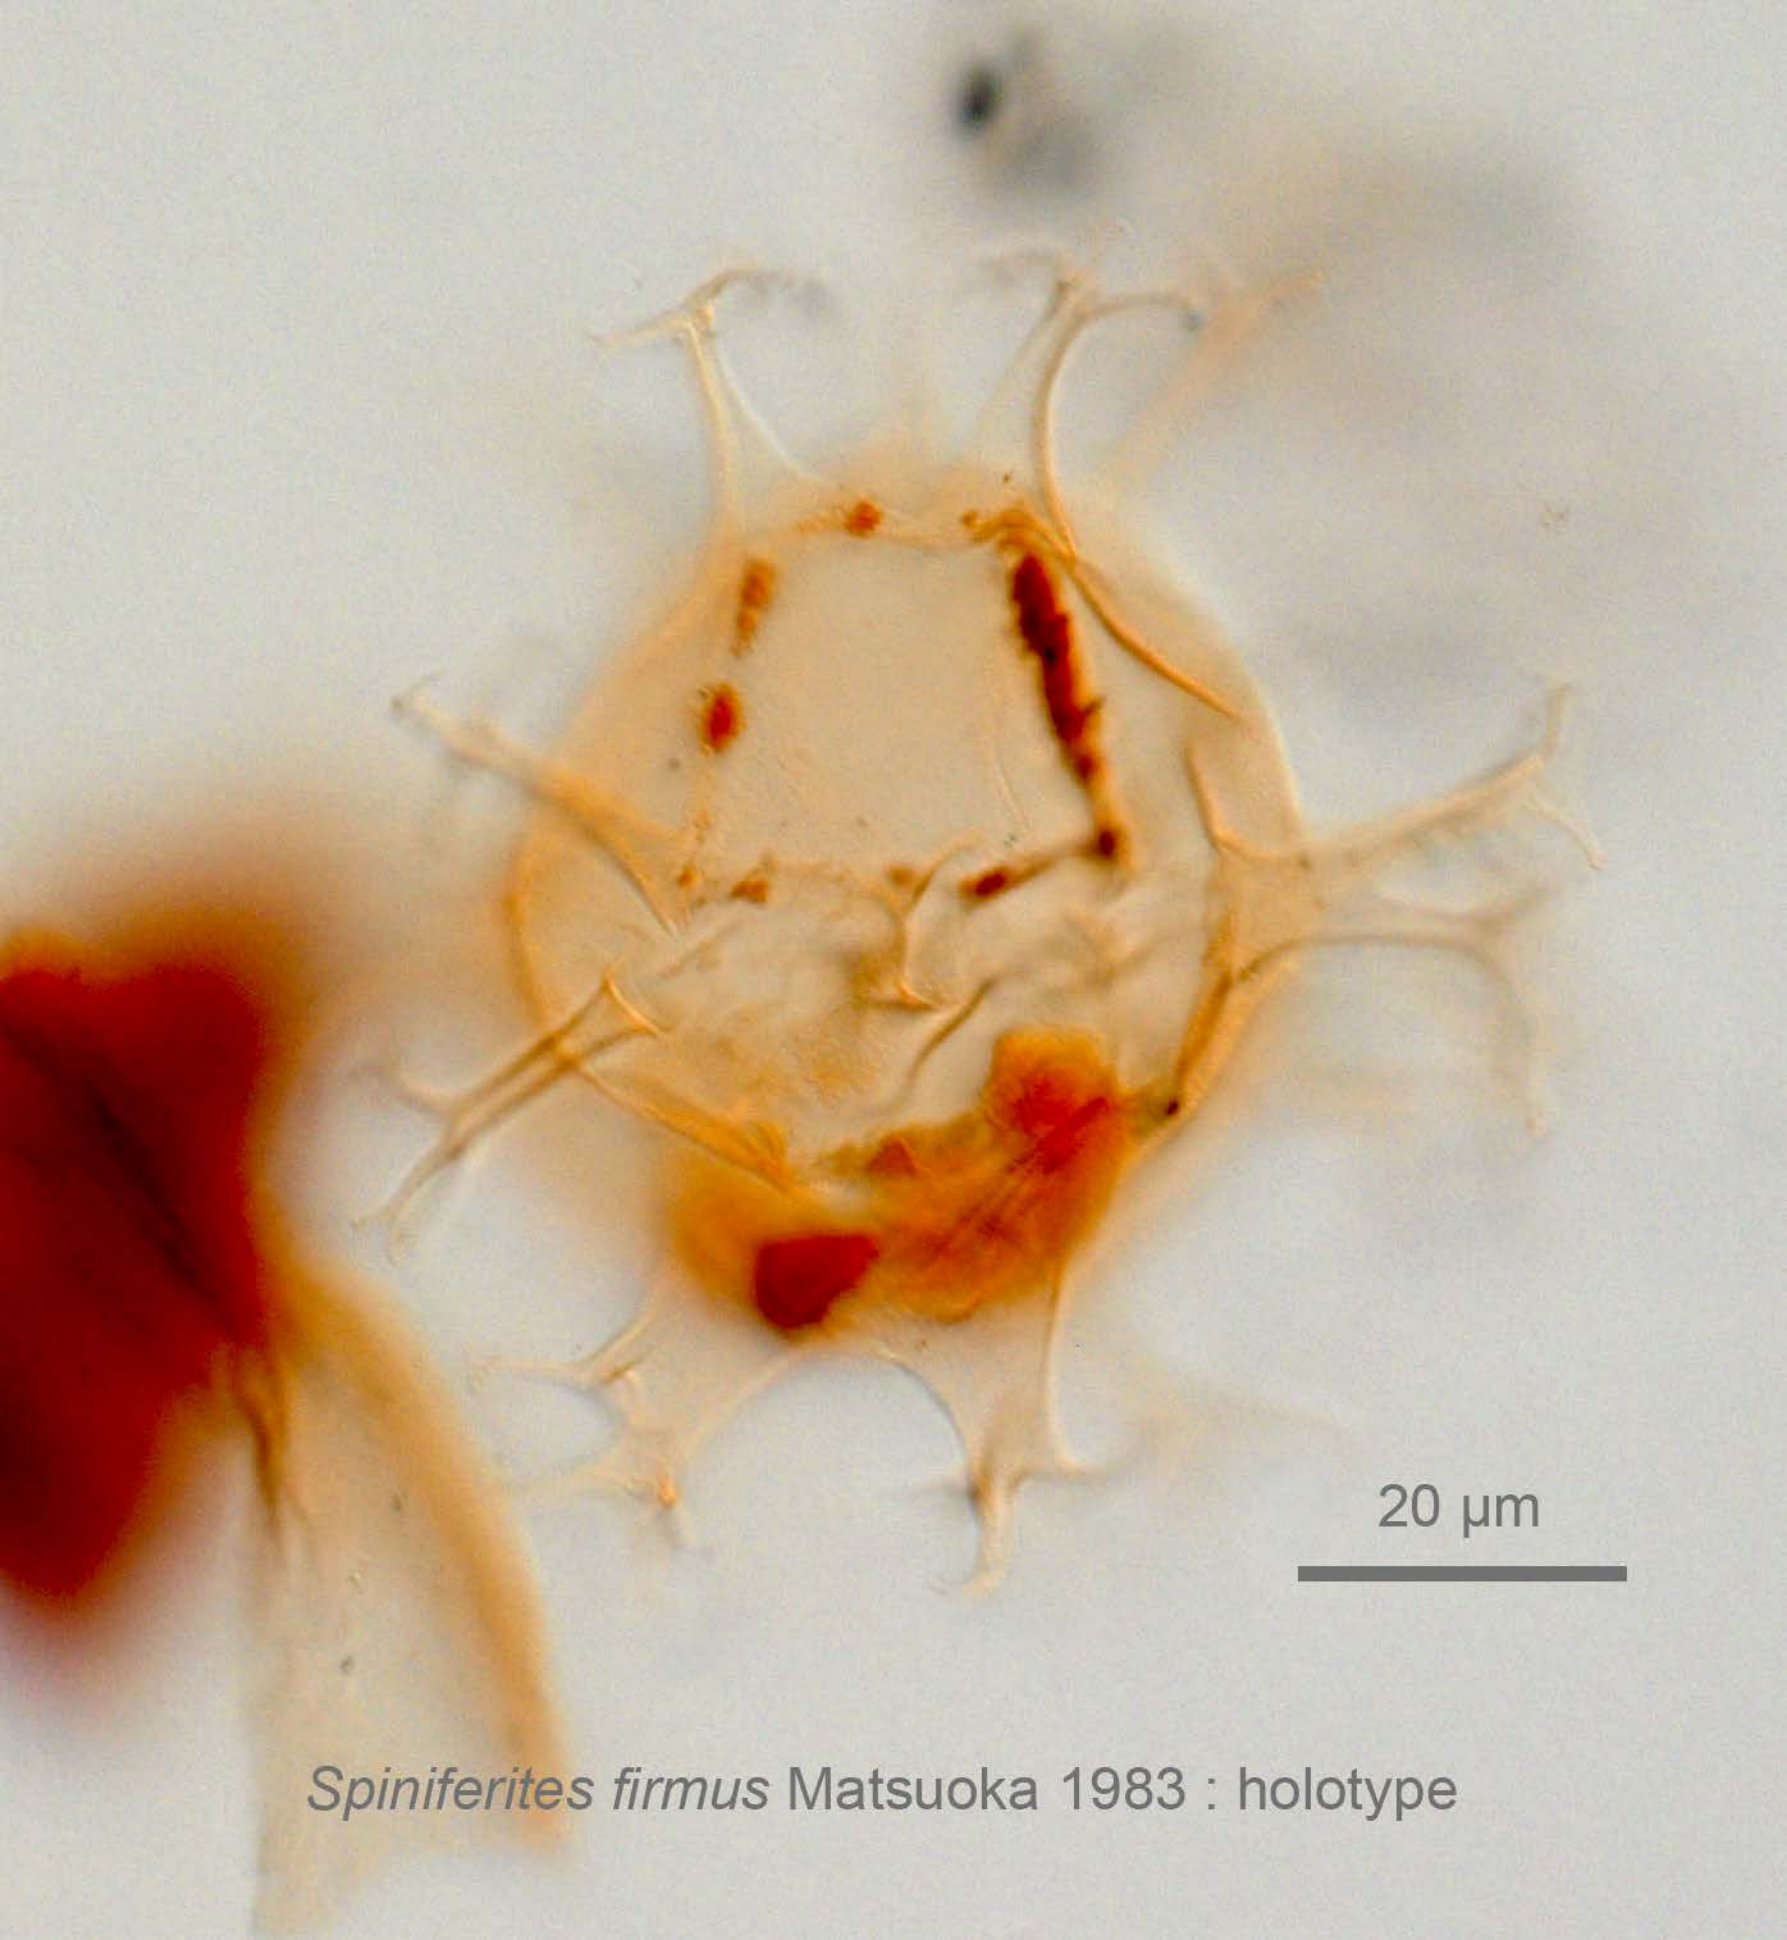

20  $\mu\text{m}$

*Spiniferites firmus* Matsuoka 1983 : holotype



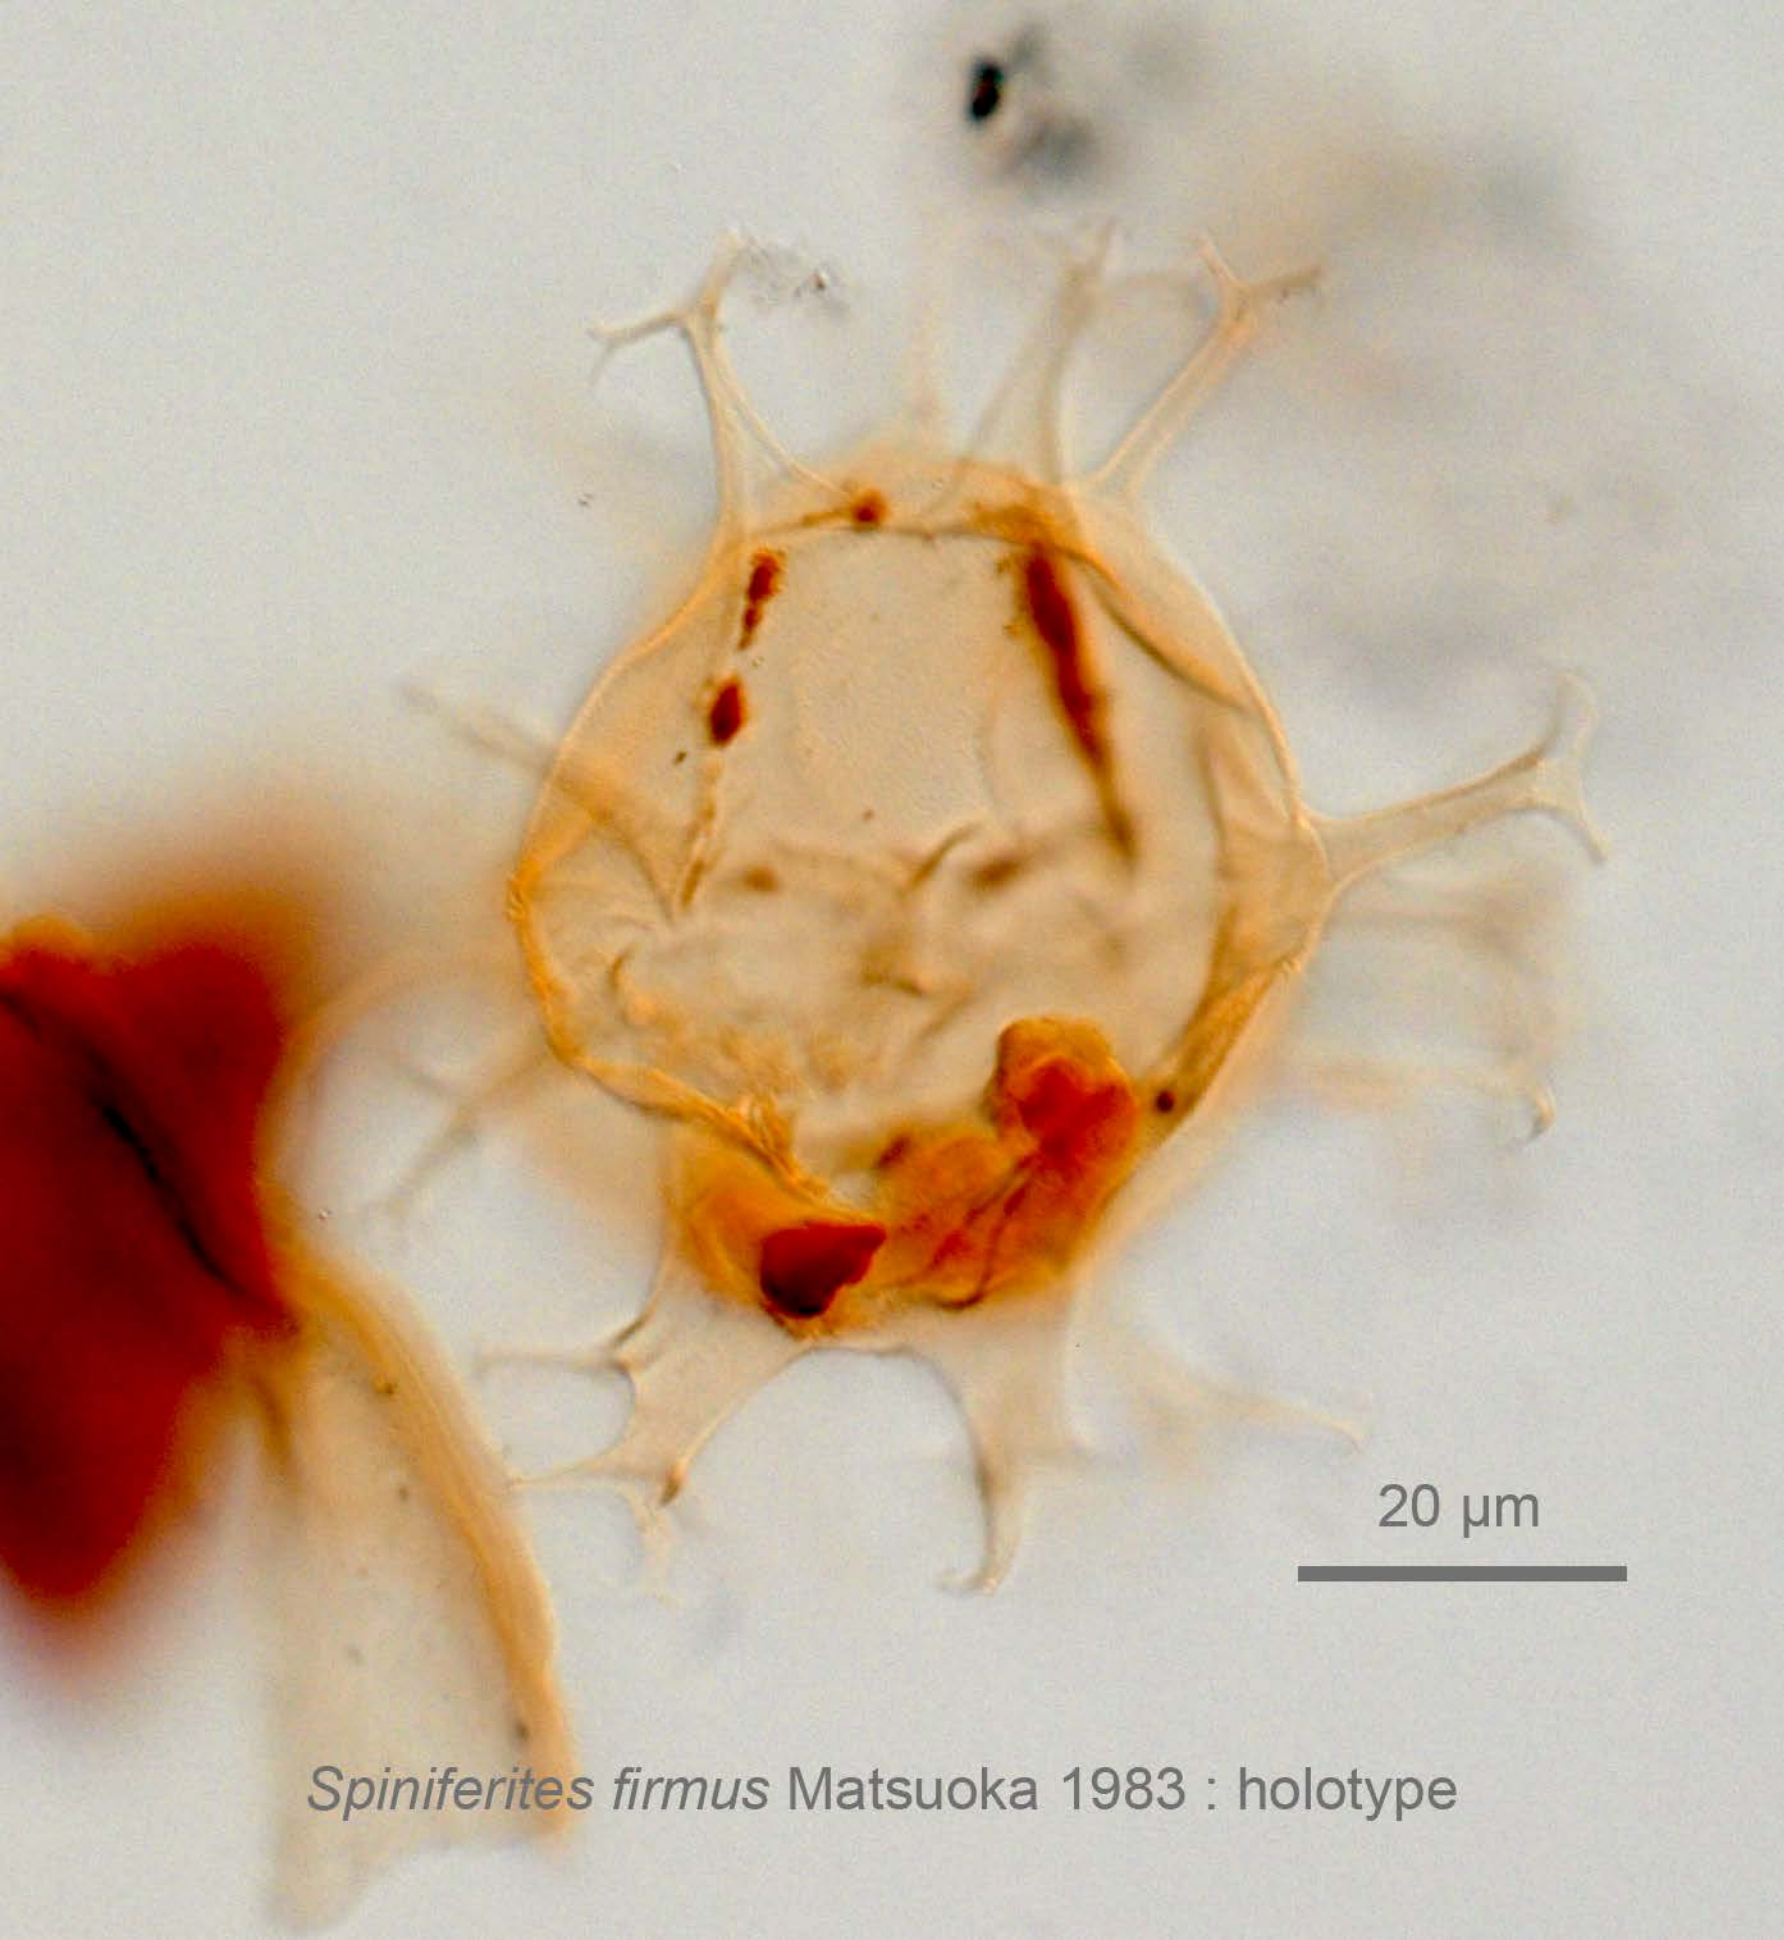

20 μm

*Spiniferites firmus* Matsuoka 1983 : holotype



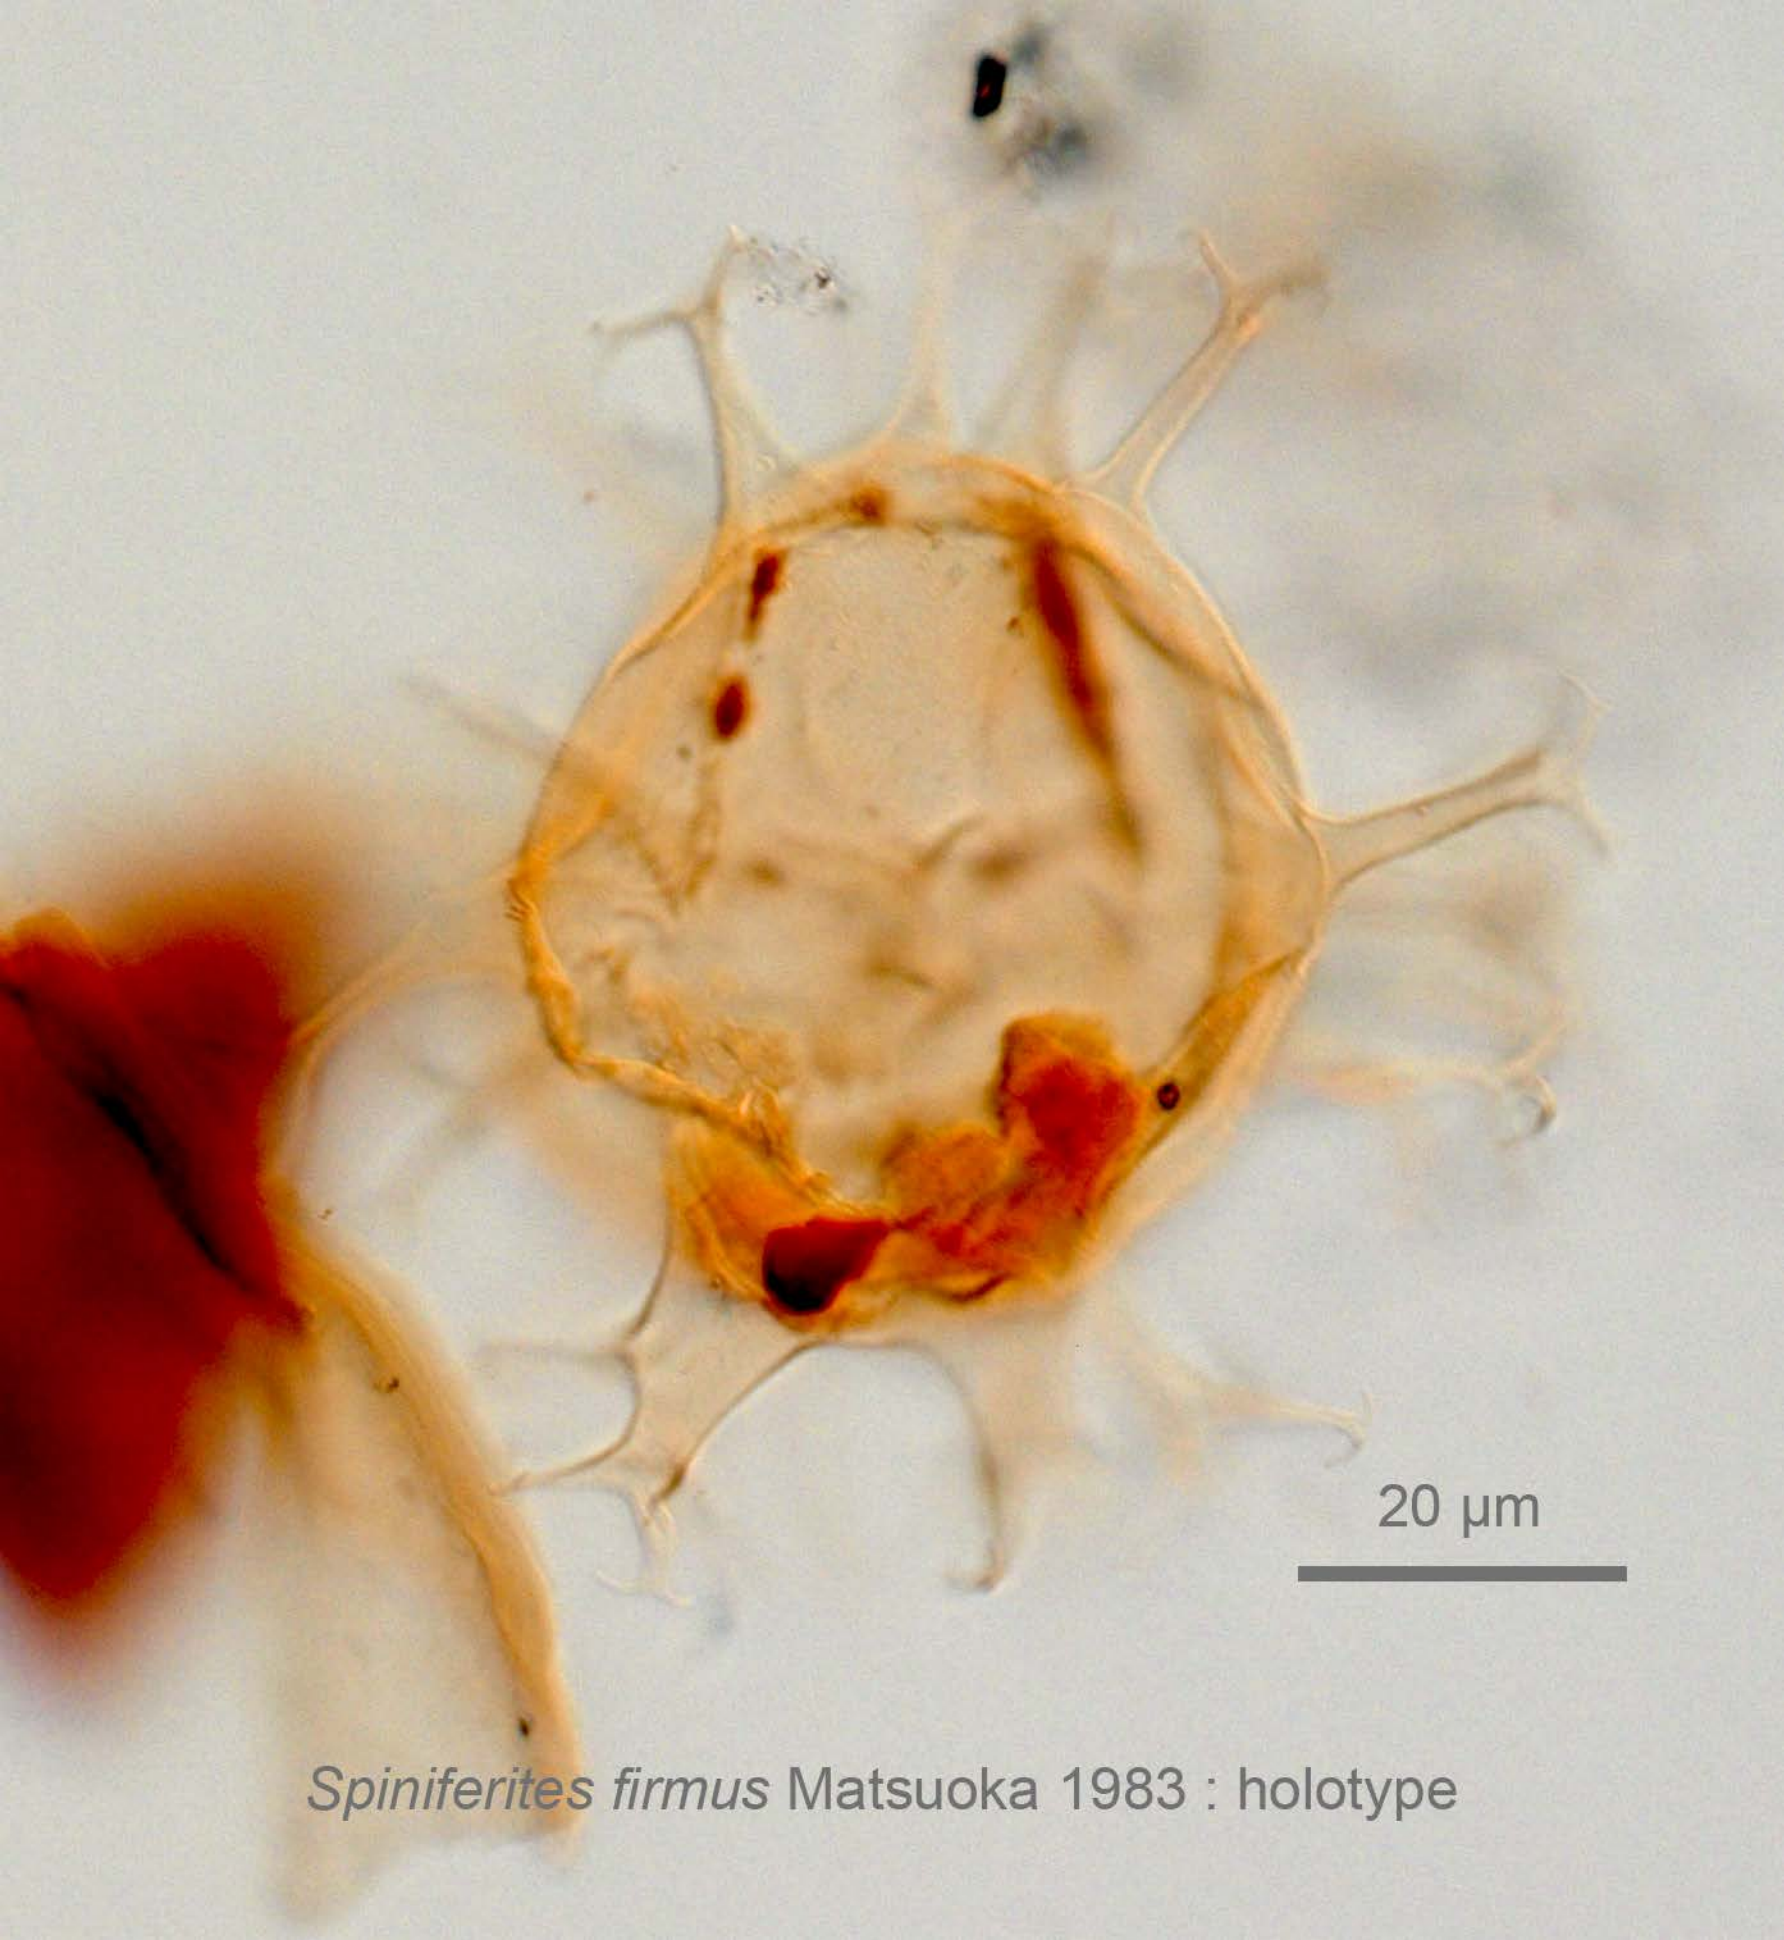

20 μm

*Spiniferites firmus* Matsuoka 1983 : holotype



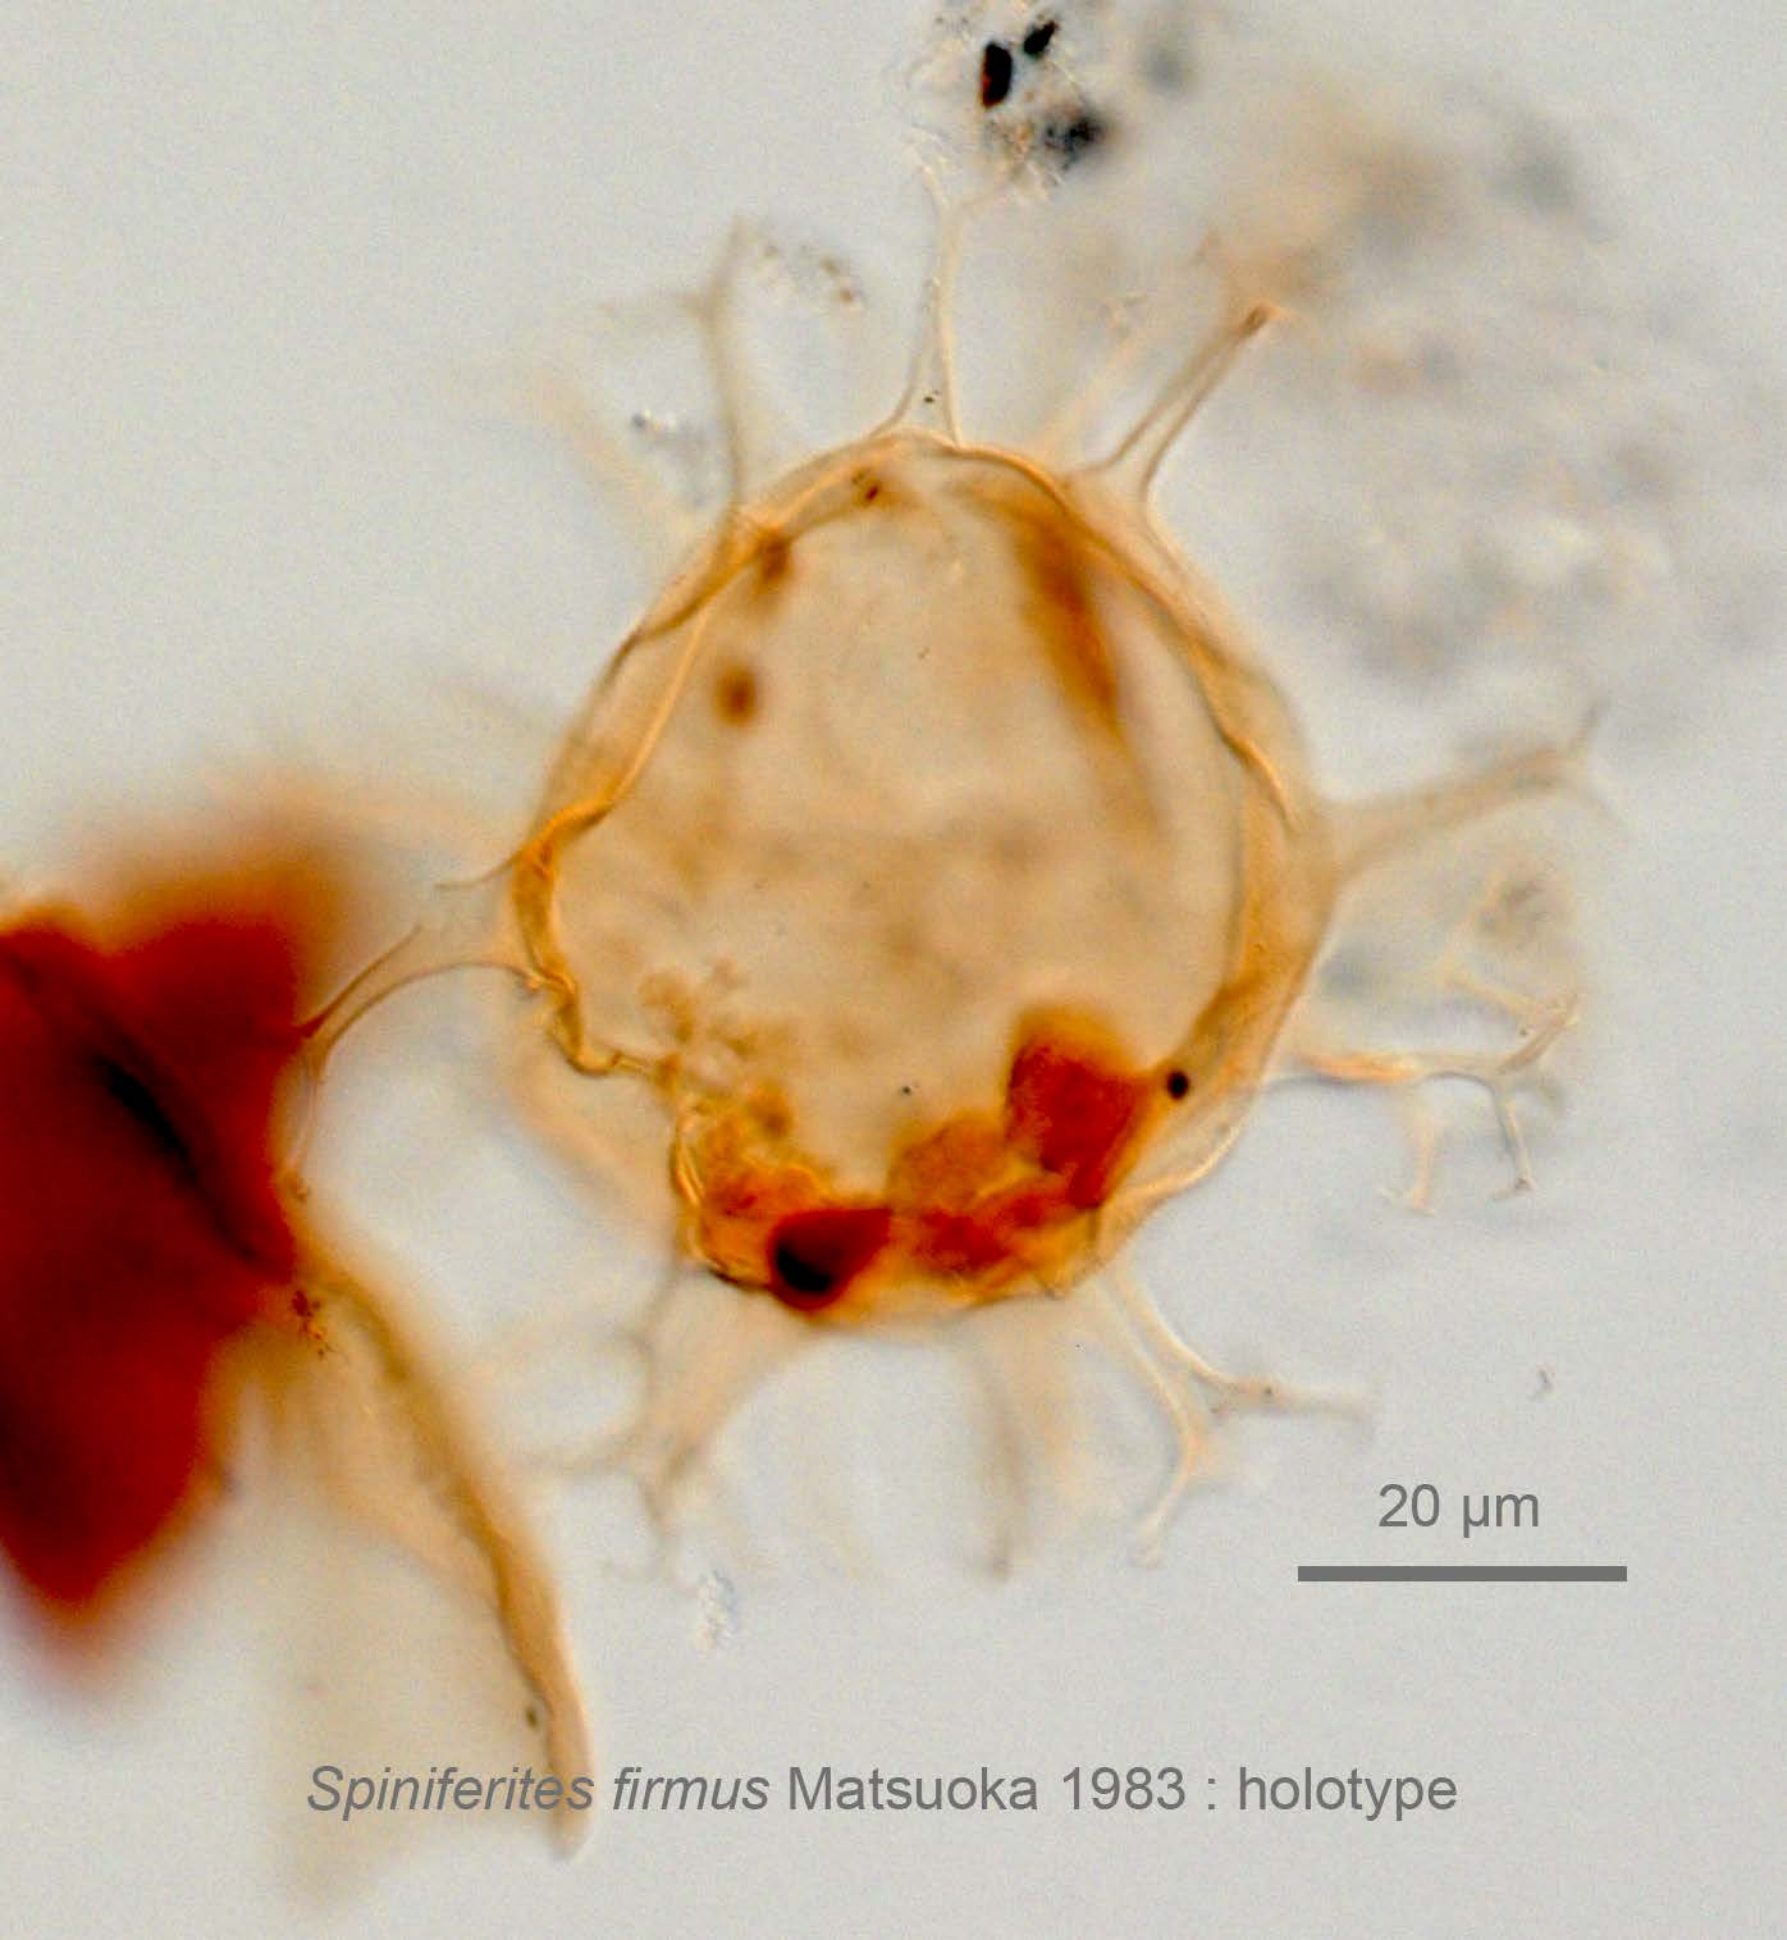

20 μm

*Spiniferites firmus* Matsuoka 1983 : holotype



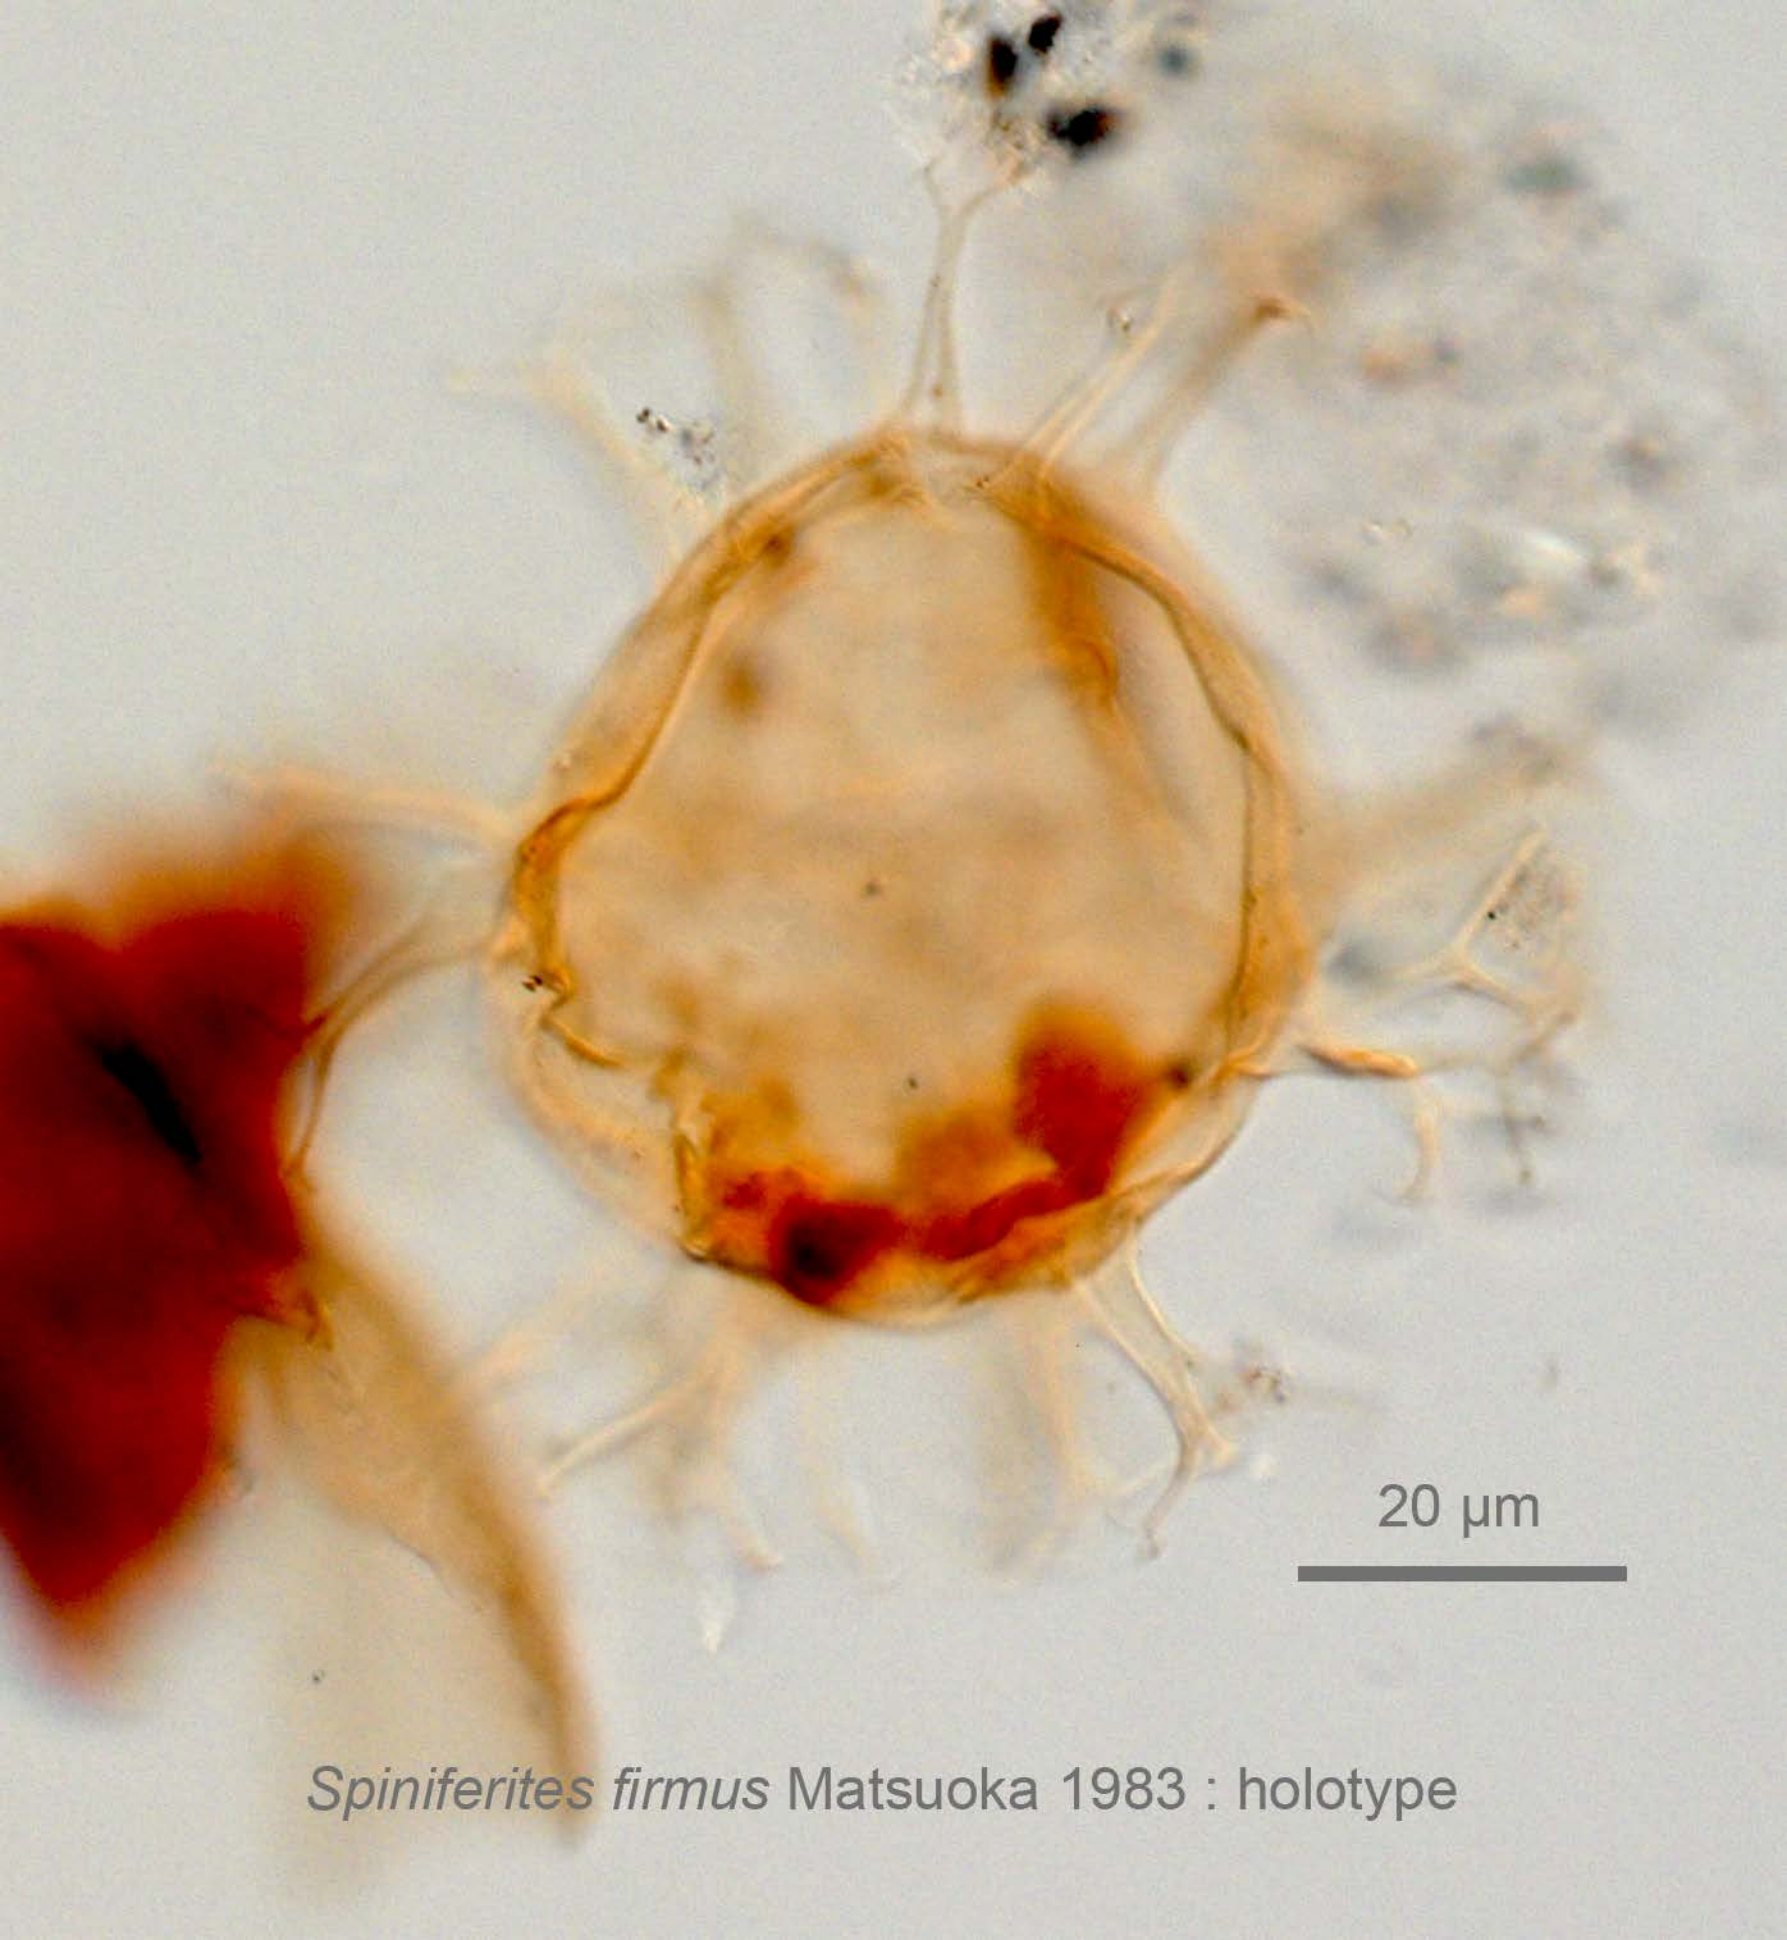

20  $\mu\text{m}$

*Spiniferites firmus* Matsuoka 1983 : holotype



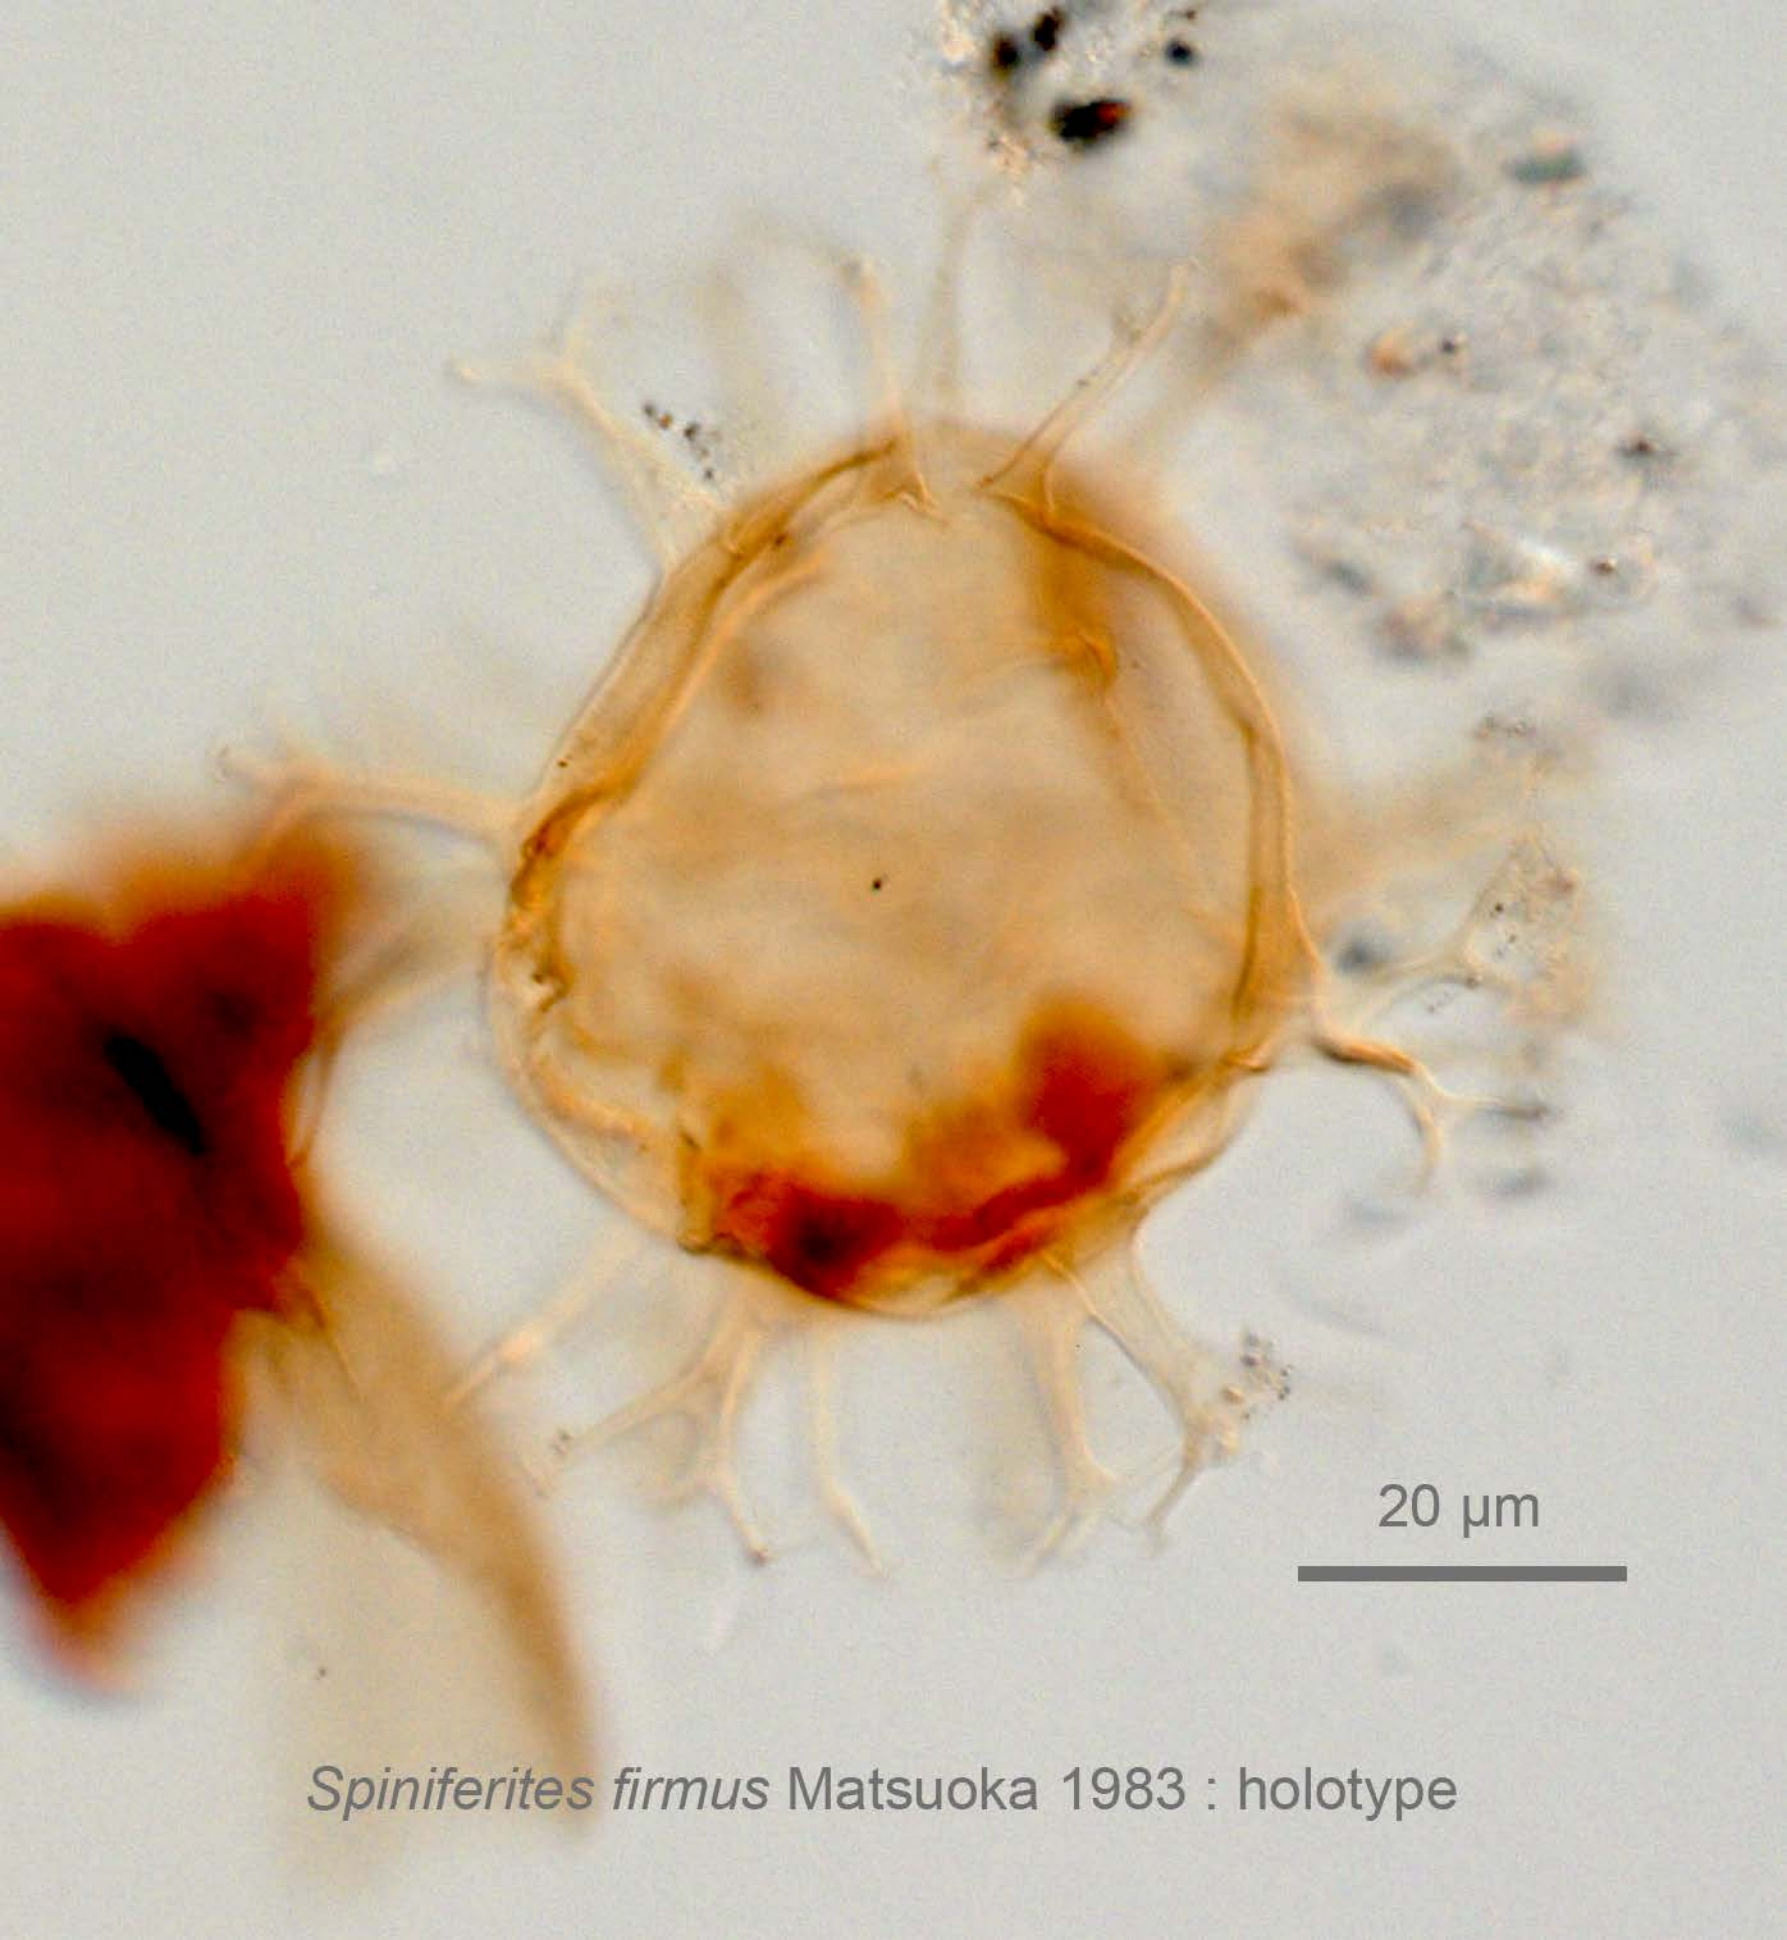

20  $\mu\text{m}$

*Spiniferites firmus* Matsuoka 1983 : holotype



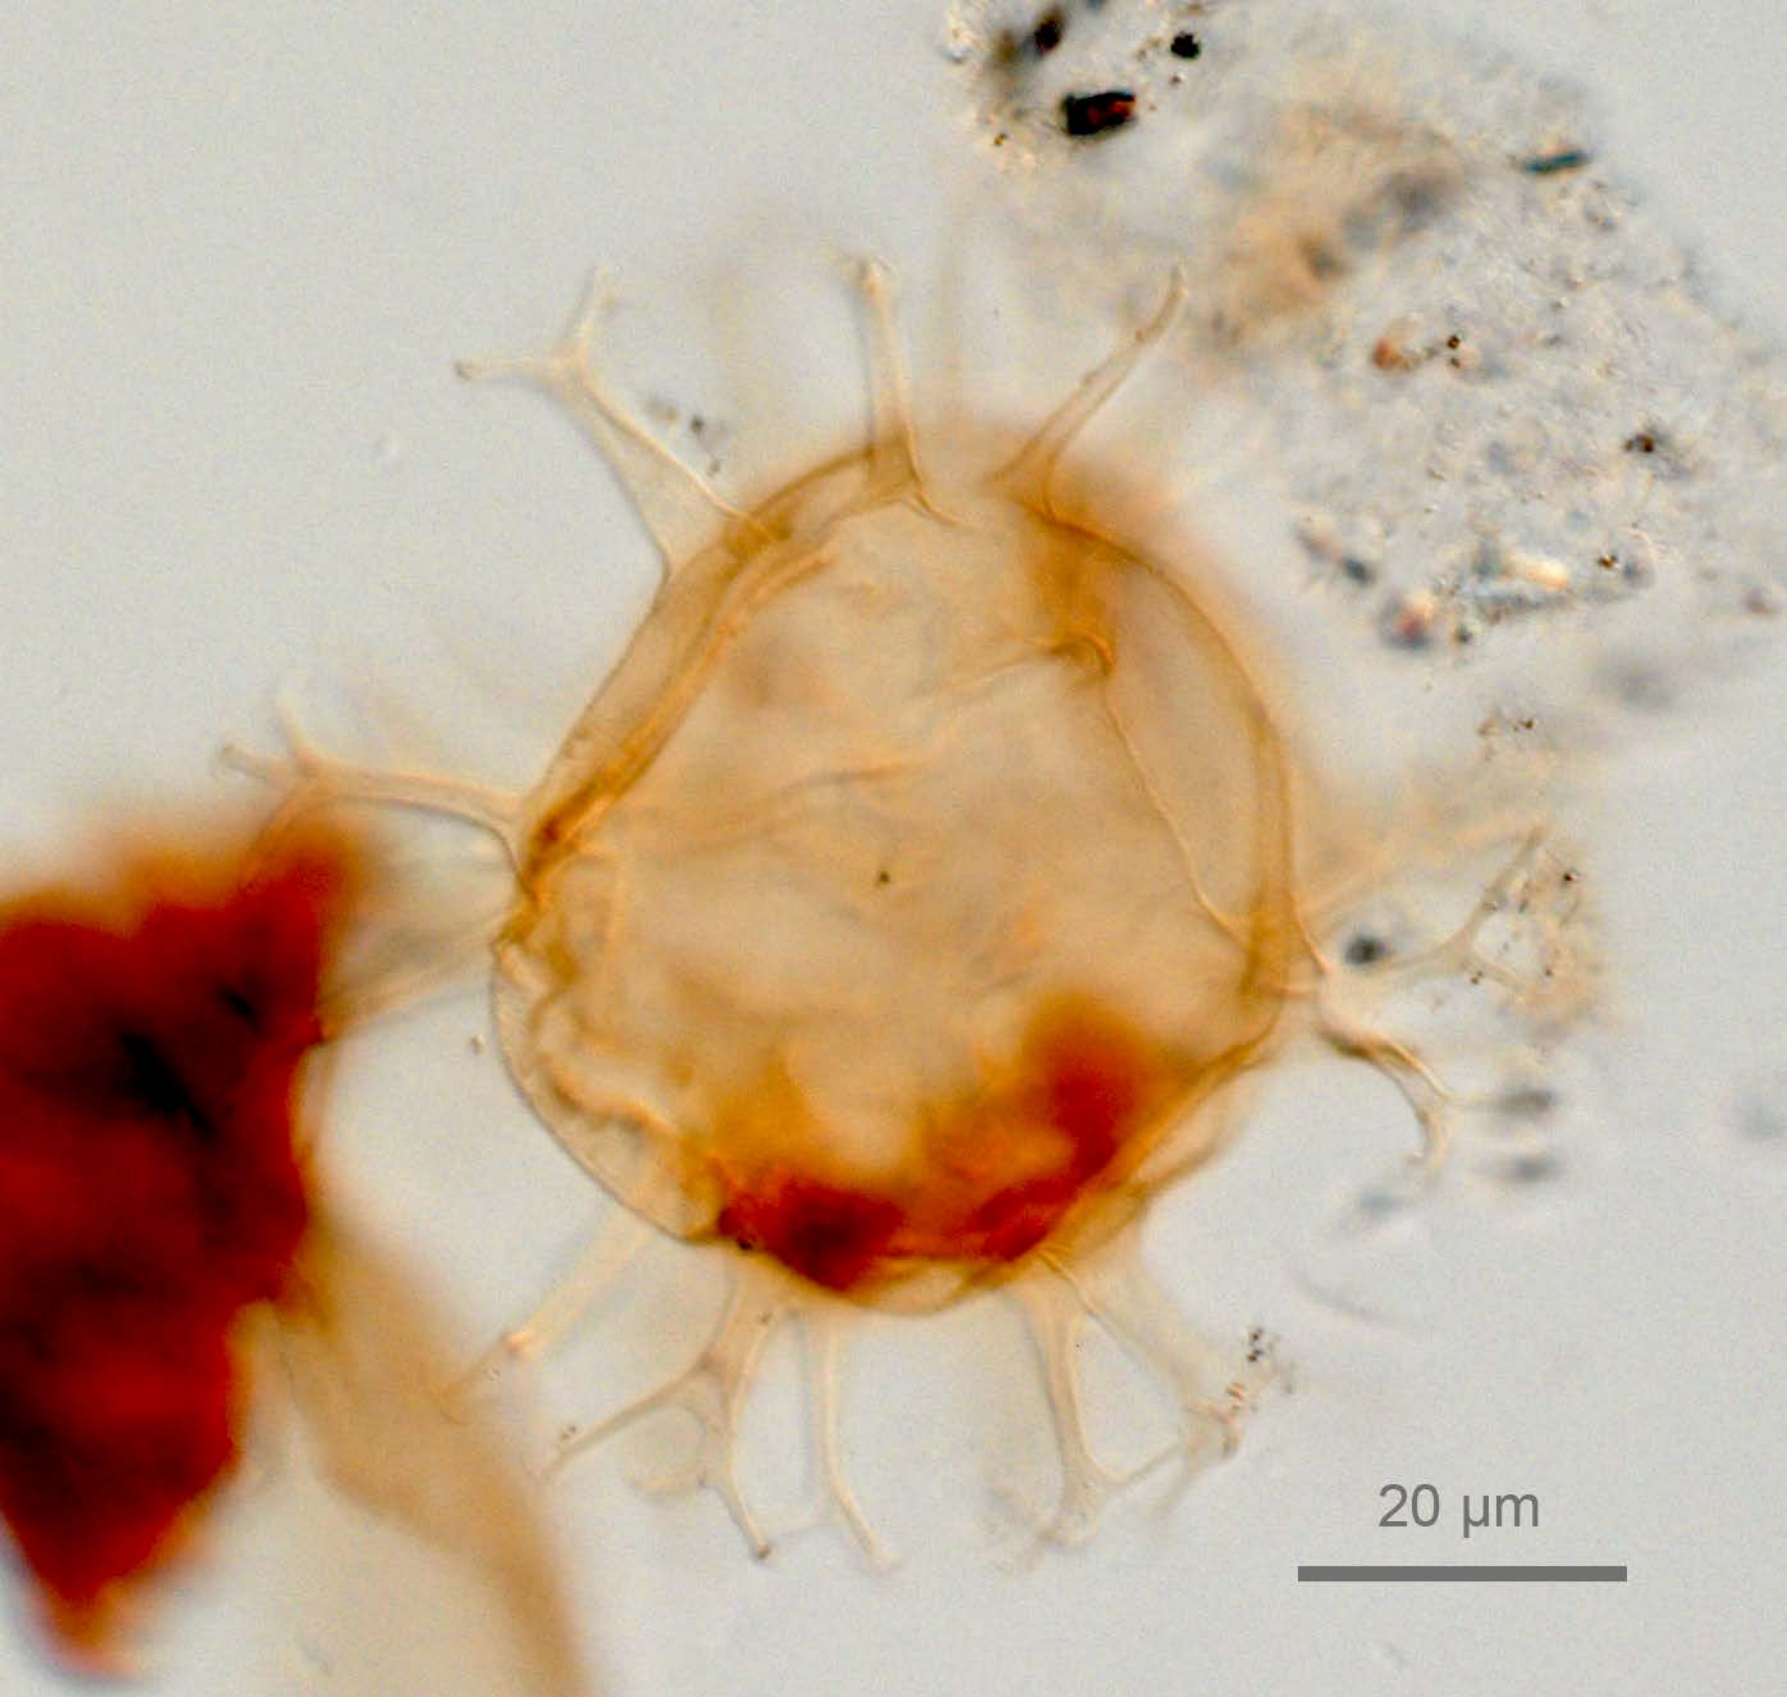

20 μm

*Spiniferites firmus* Matsuoka 1983 : holotype



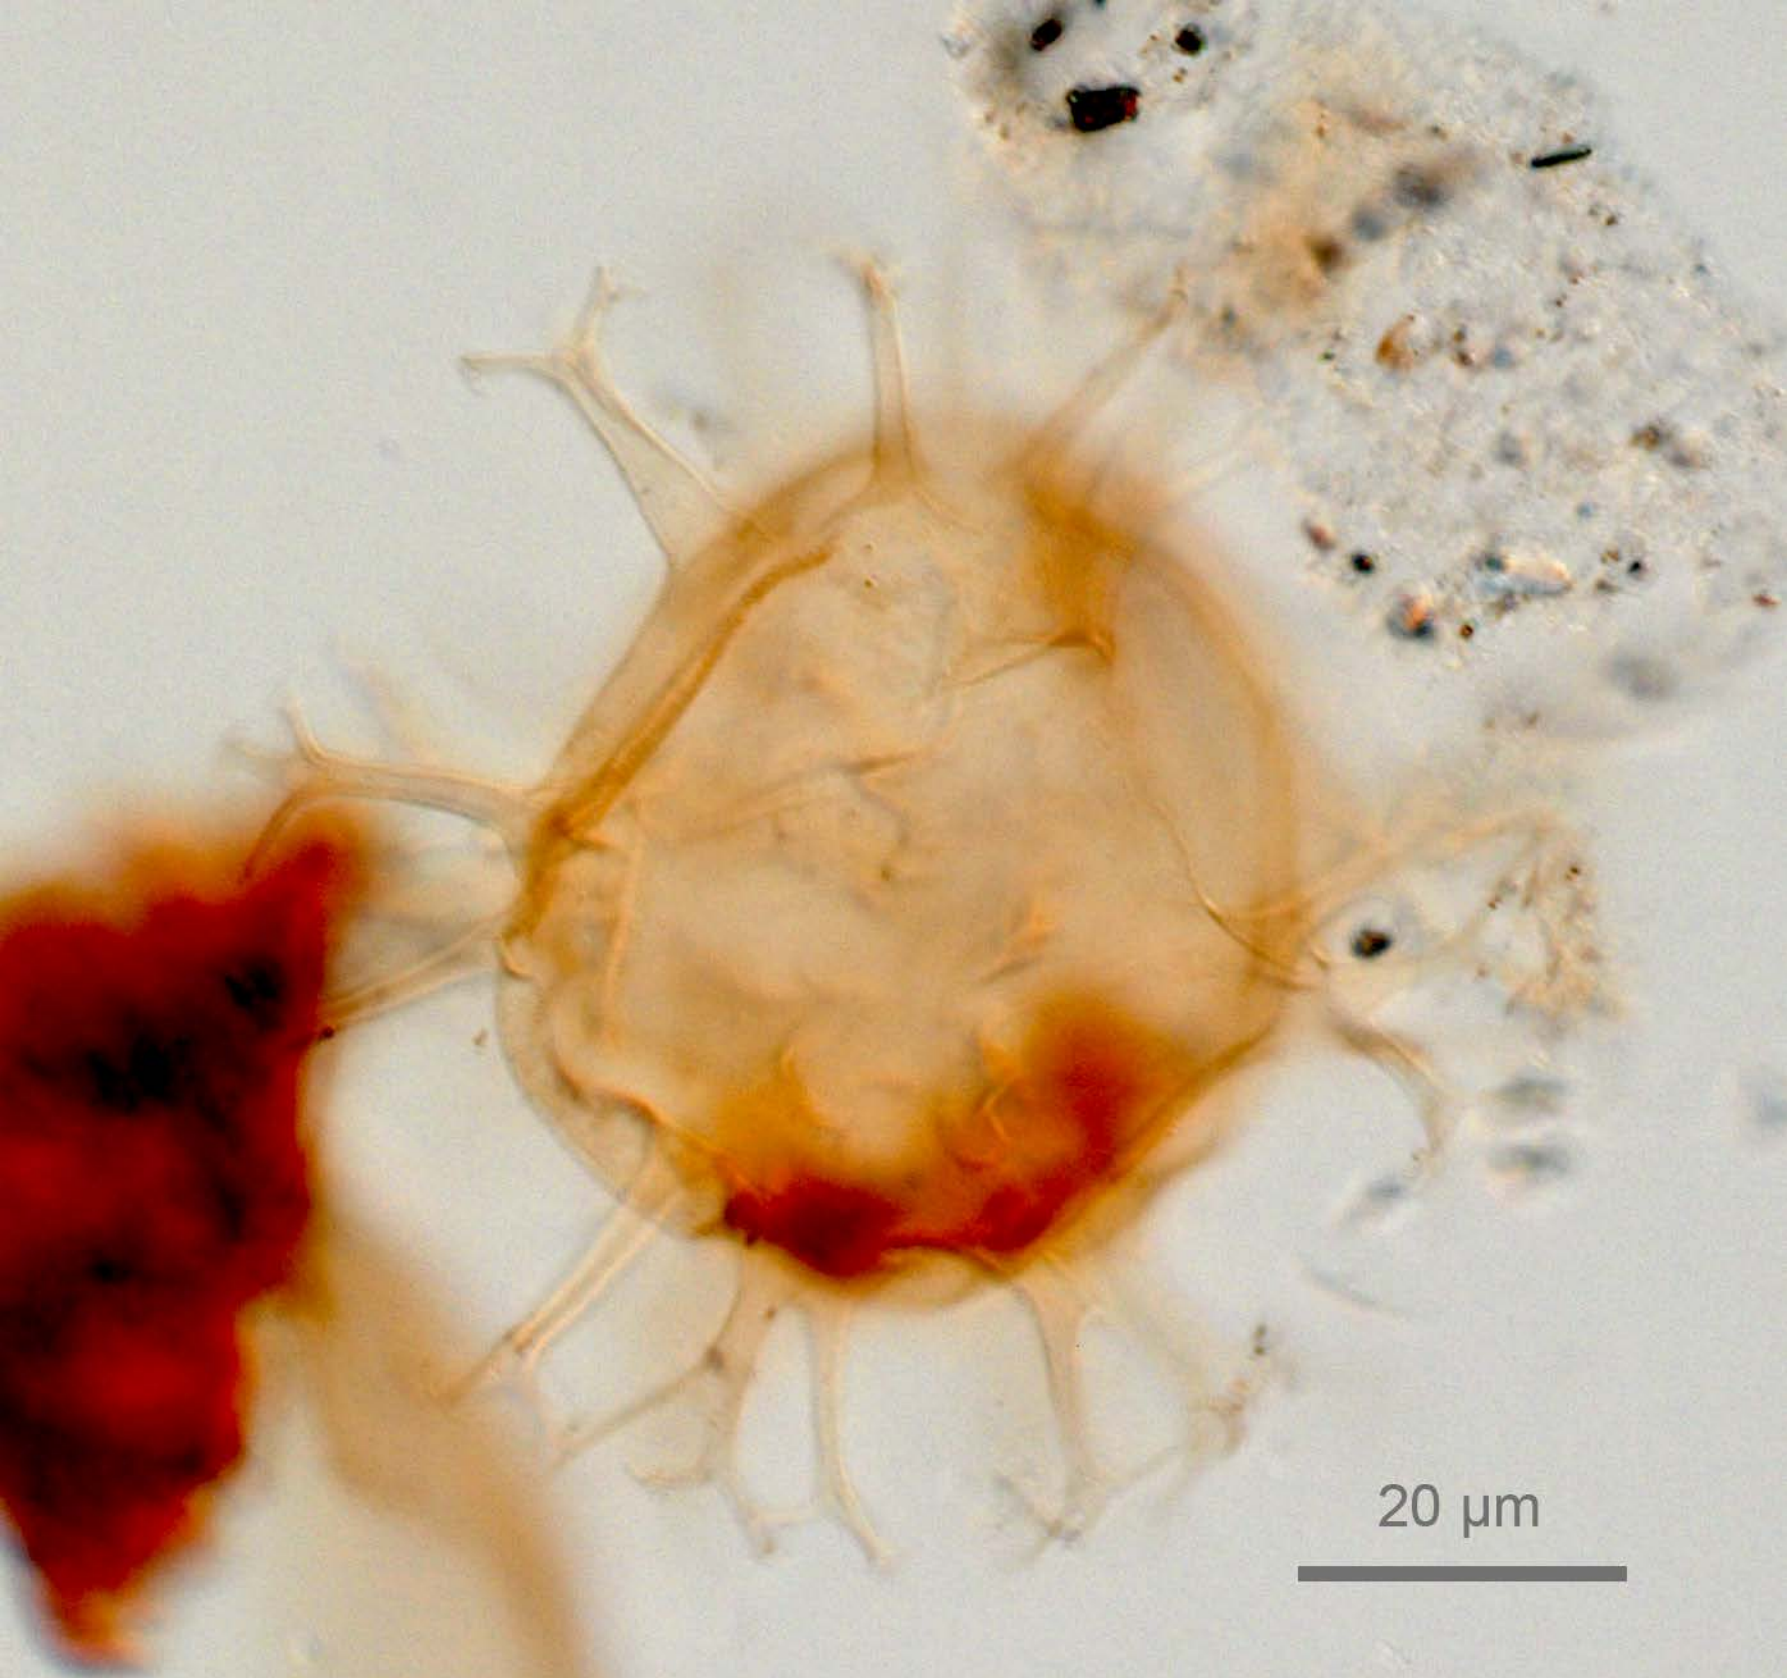

20  $\mu\text{m}$

*Spiniferites firmus* Matsuoka 1983 : holotype



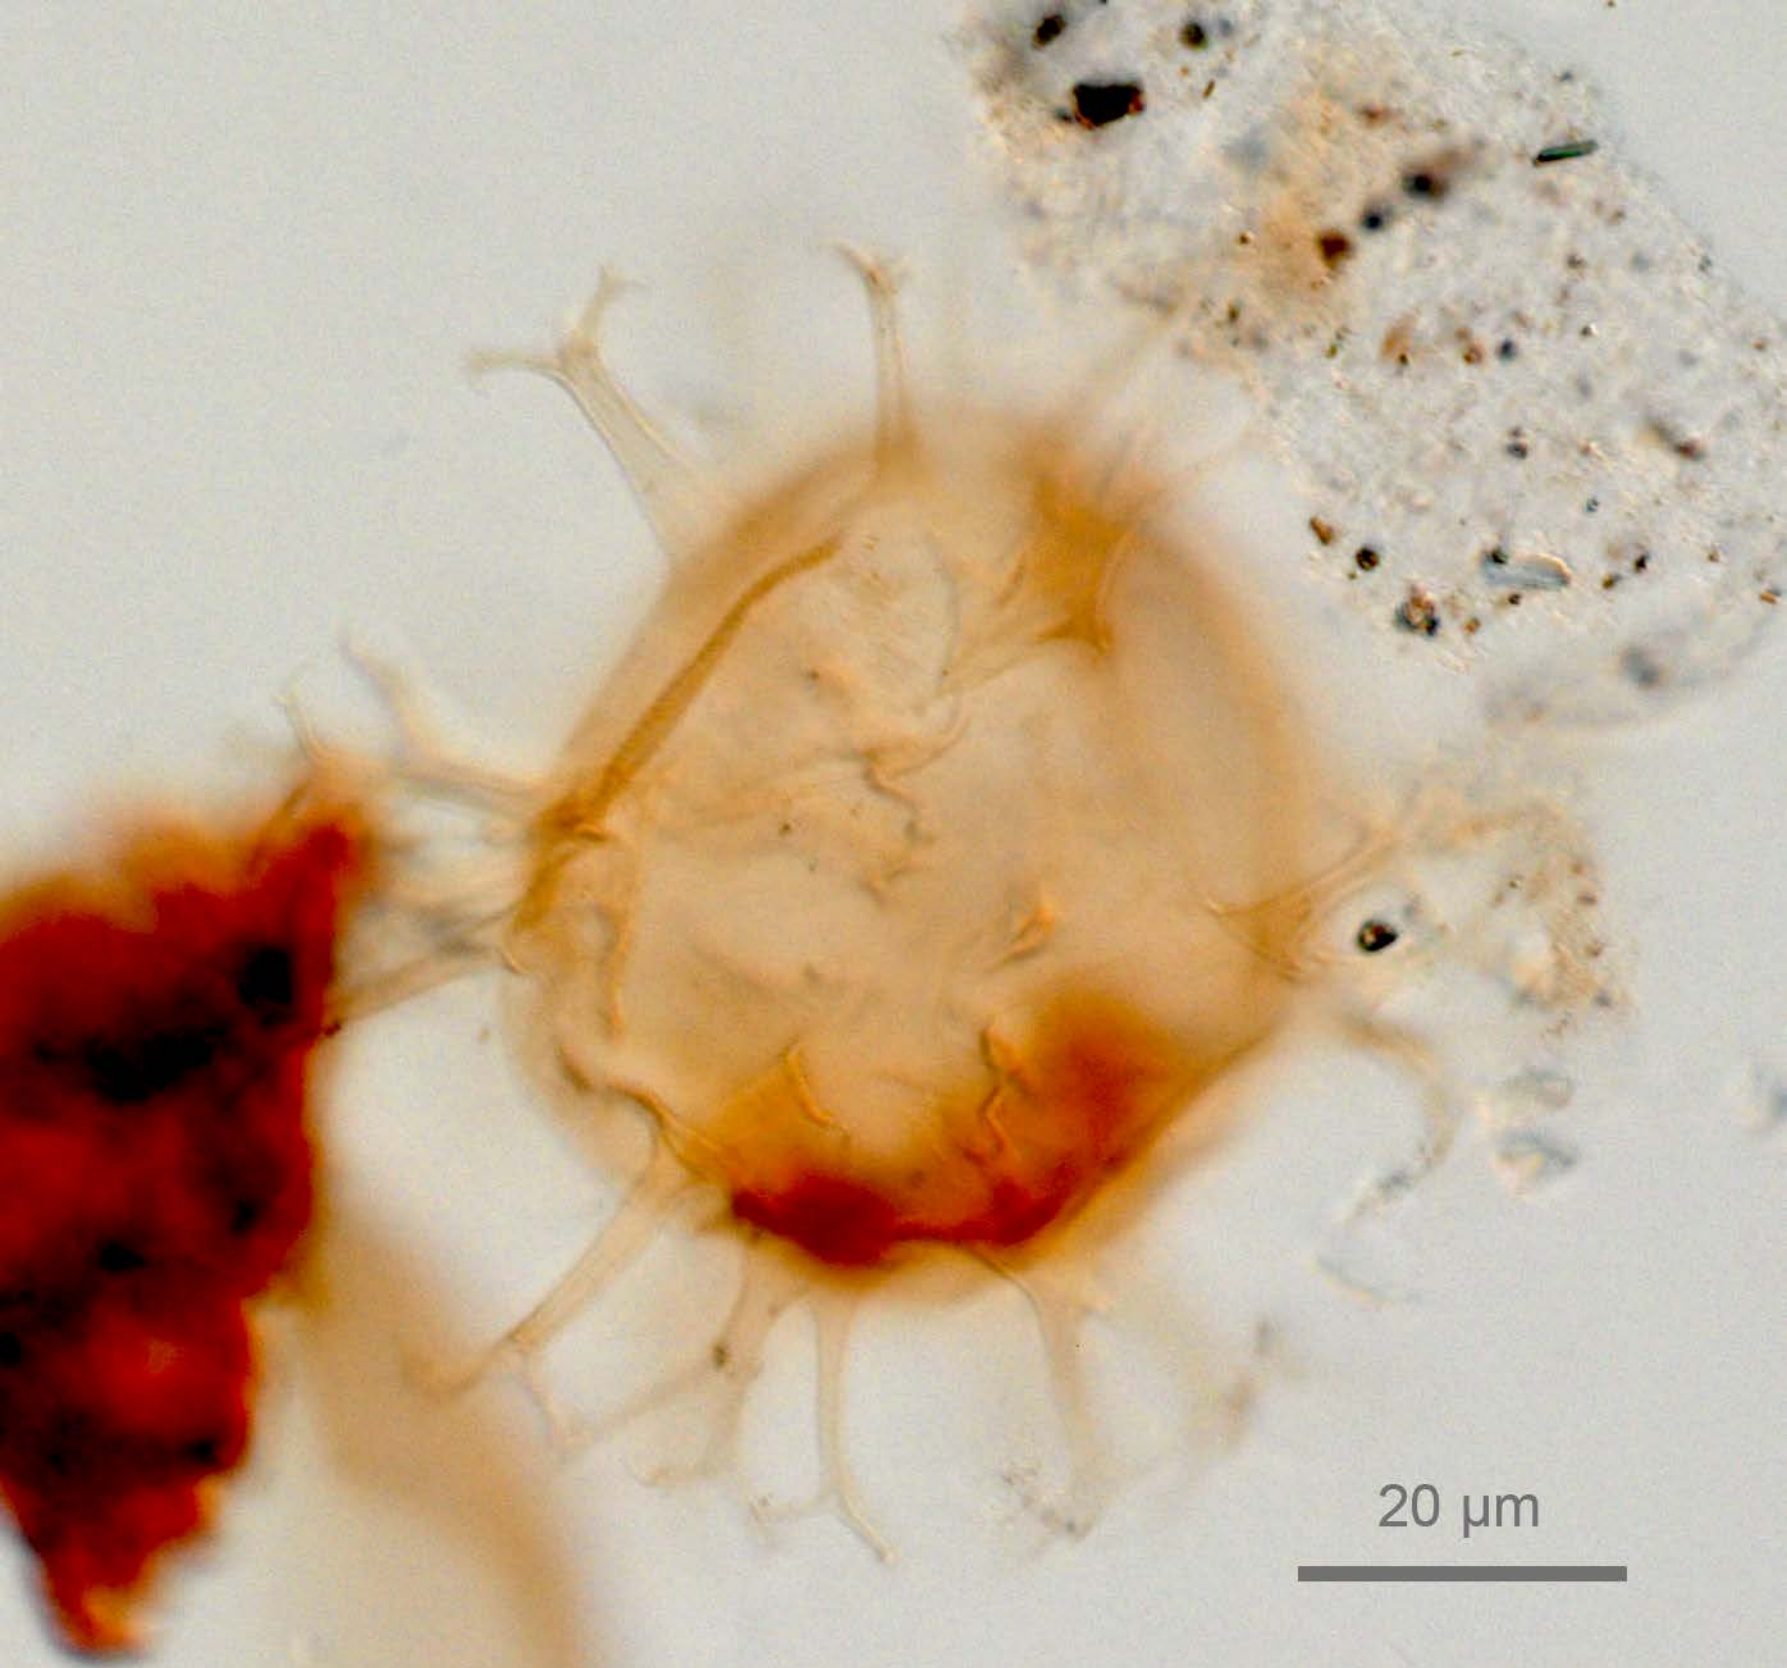

20  $\mu\text{m}$

*Spiniferites firmus* Matsuoka 1983 : holotype



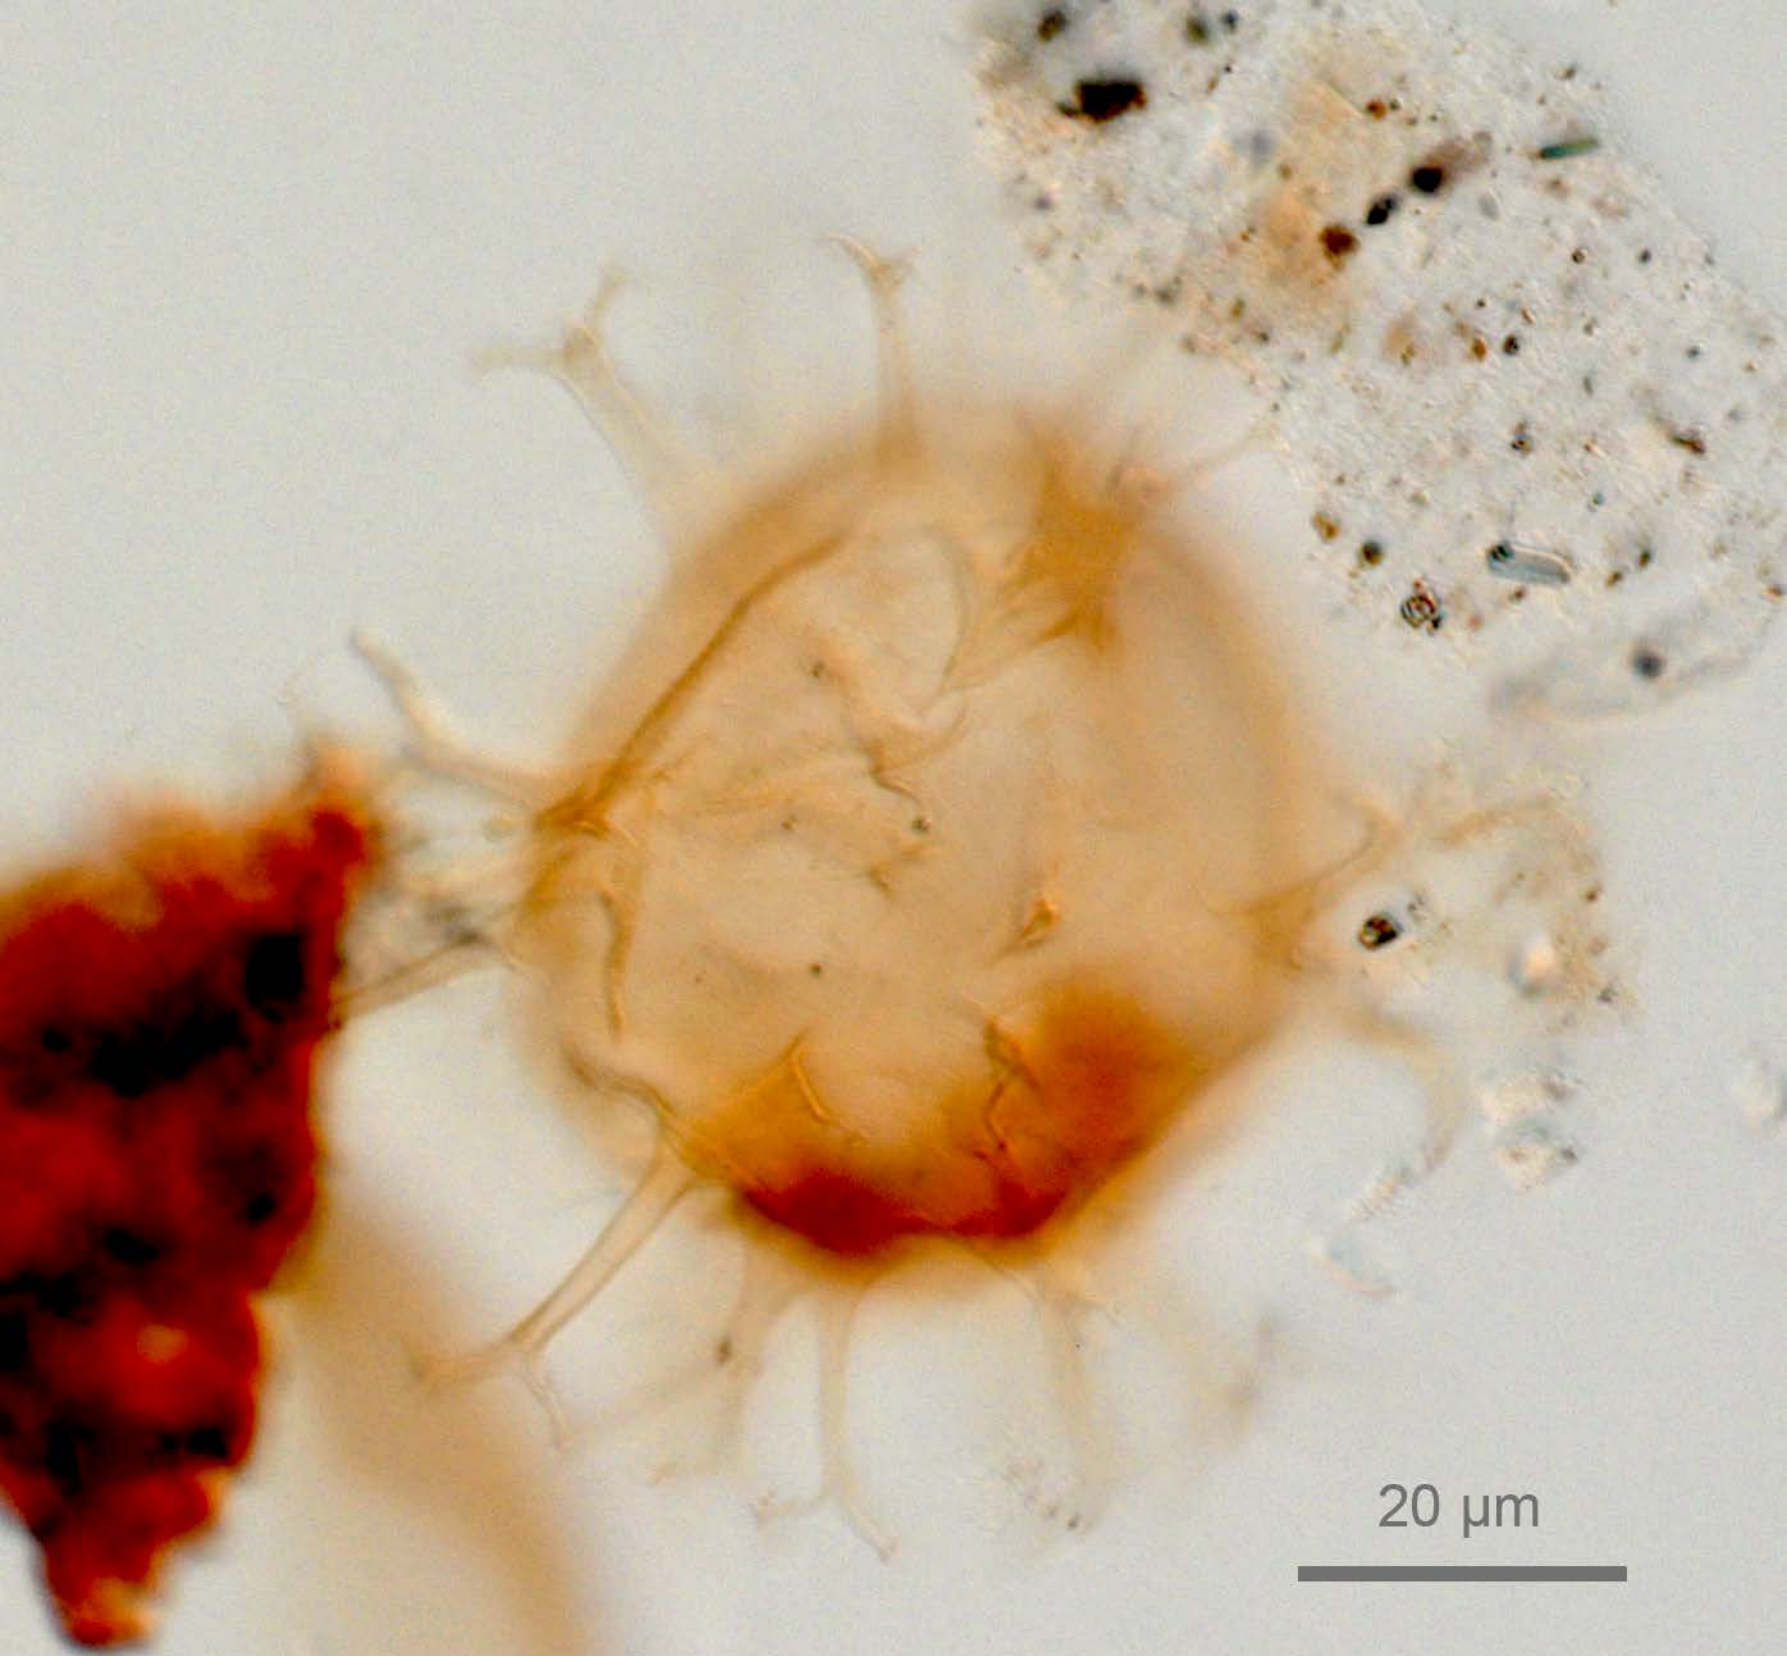

20  $\mu\text{m}$

*Spiniferites firmus* Matsuoka 1983 : holotype



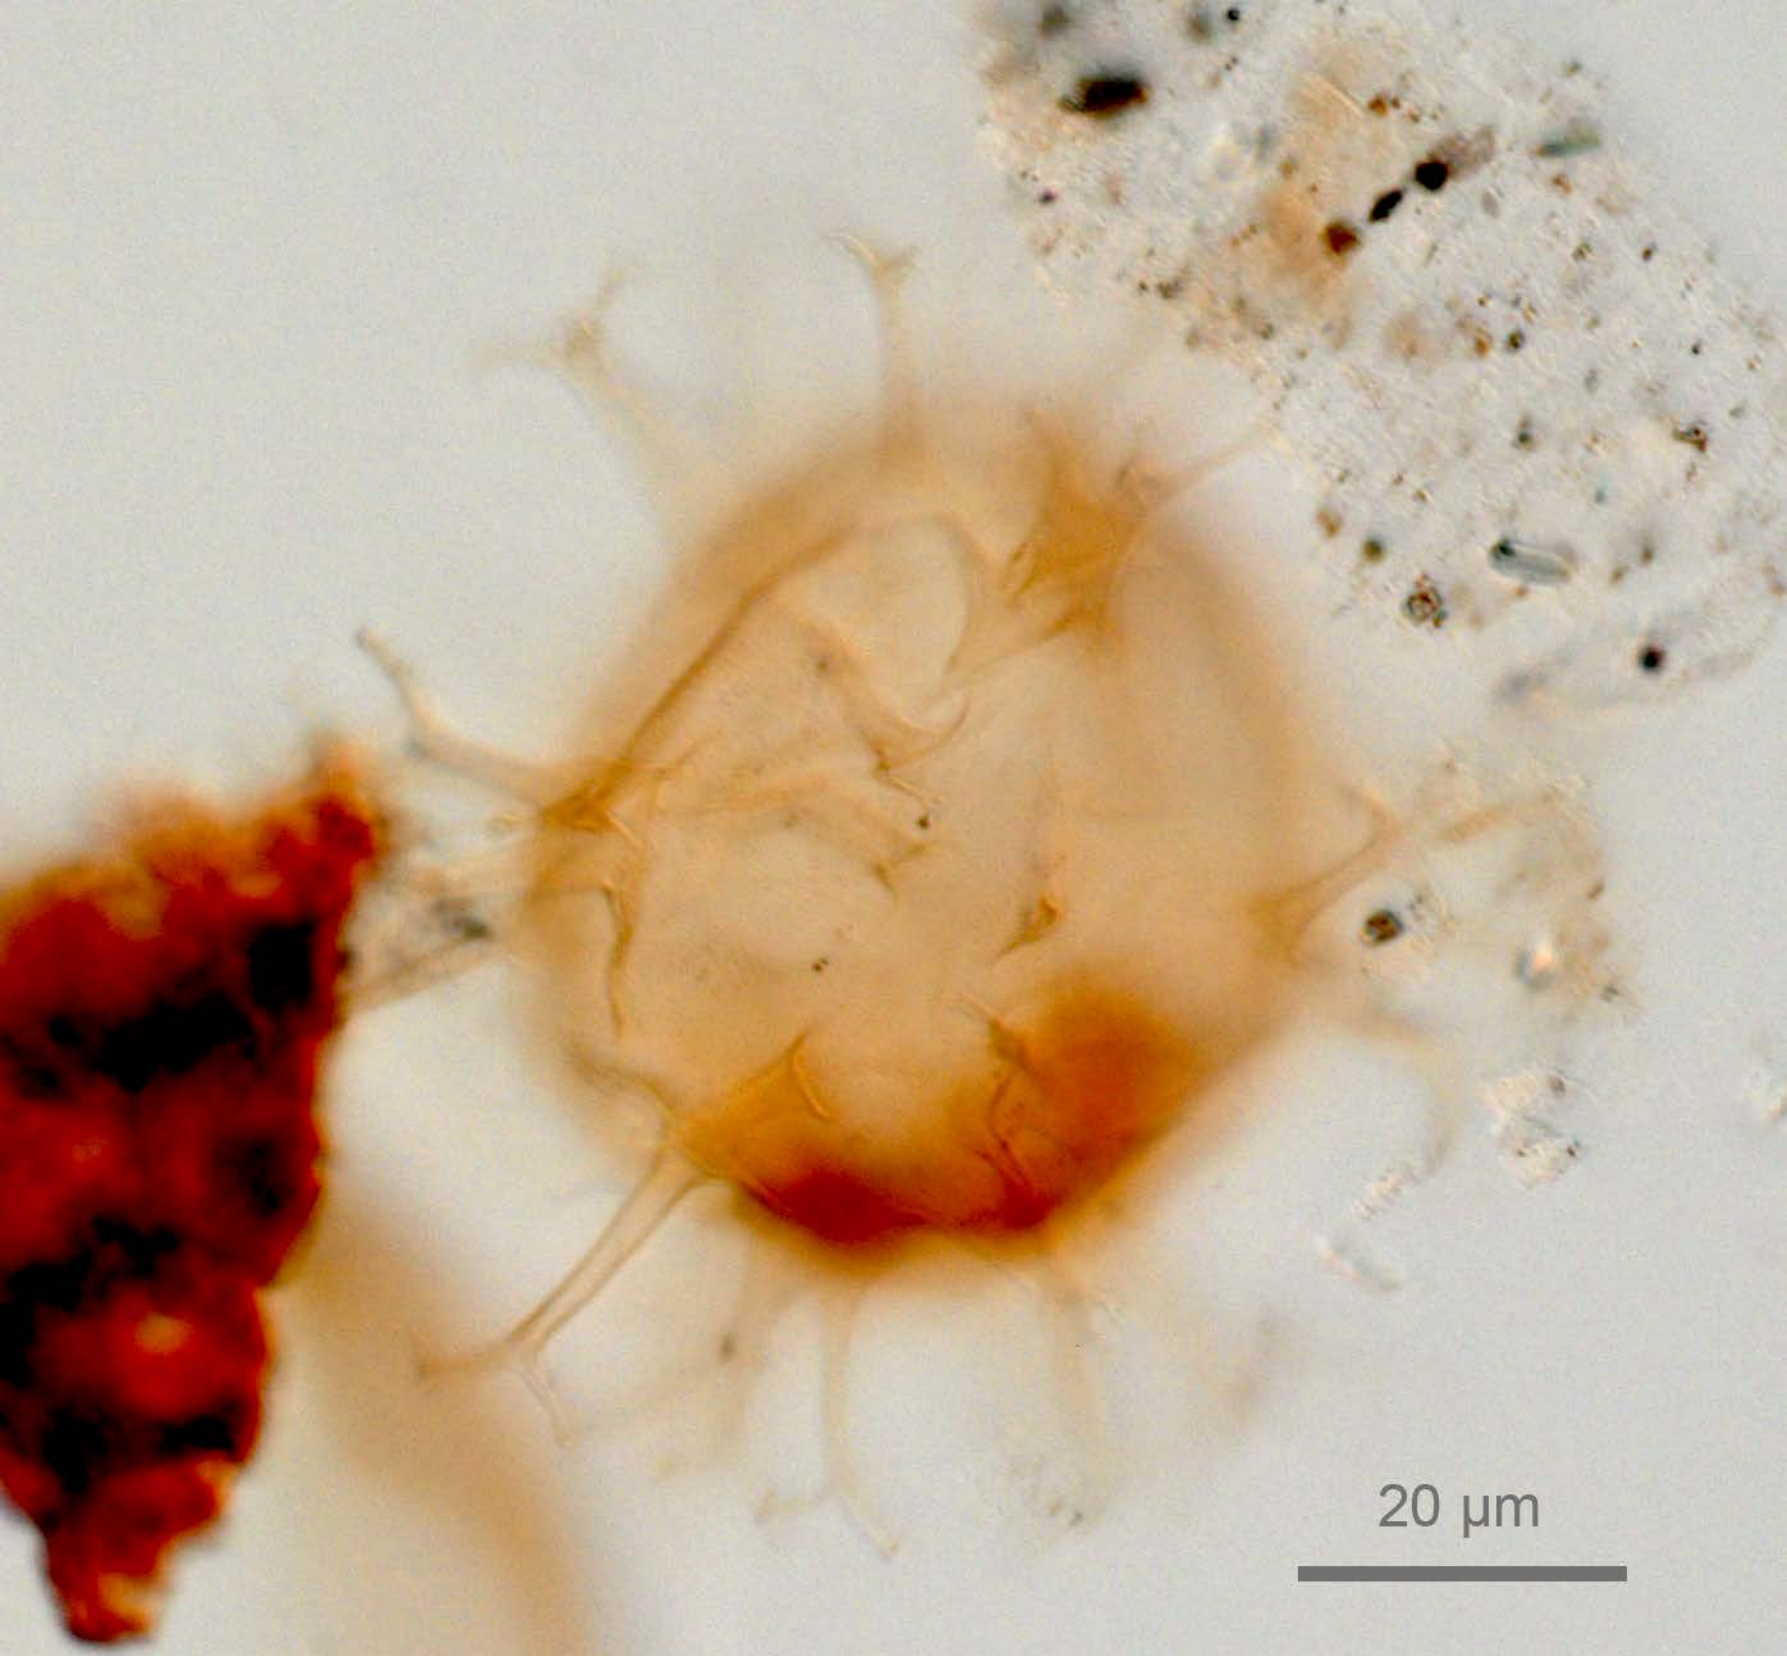

*Spiniferites firmus* Matsuoka 1983 : holotype



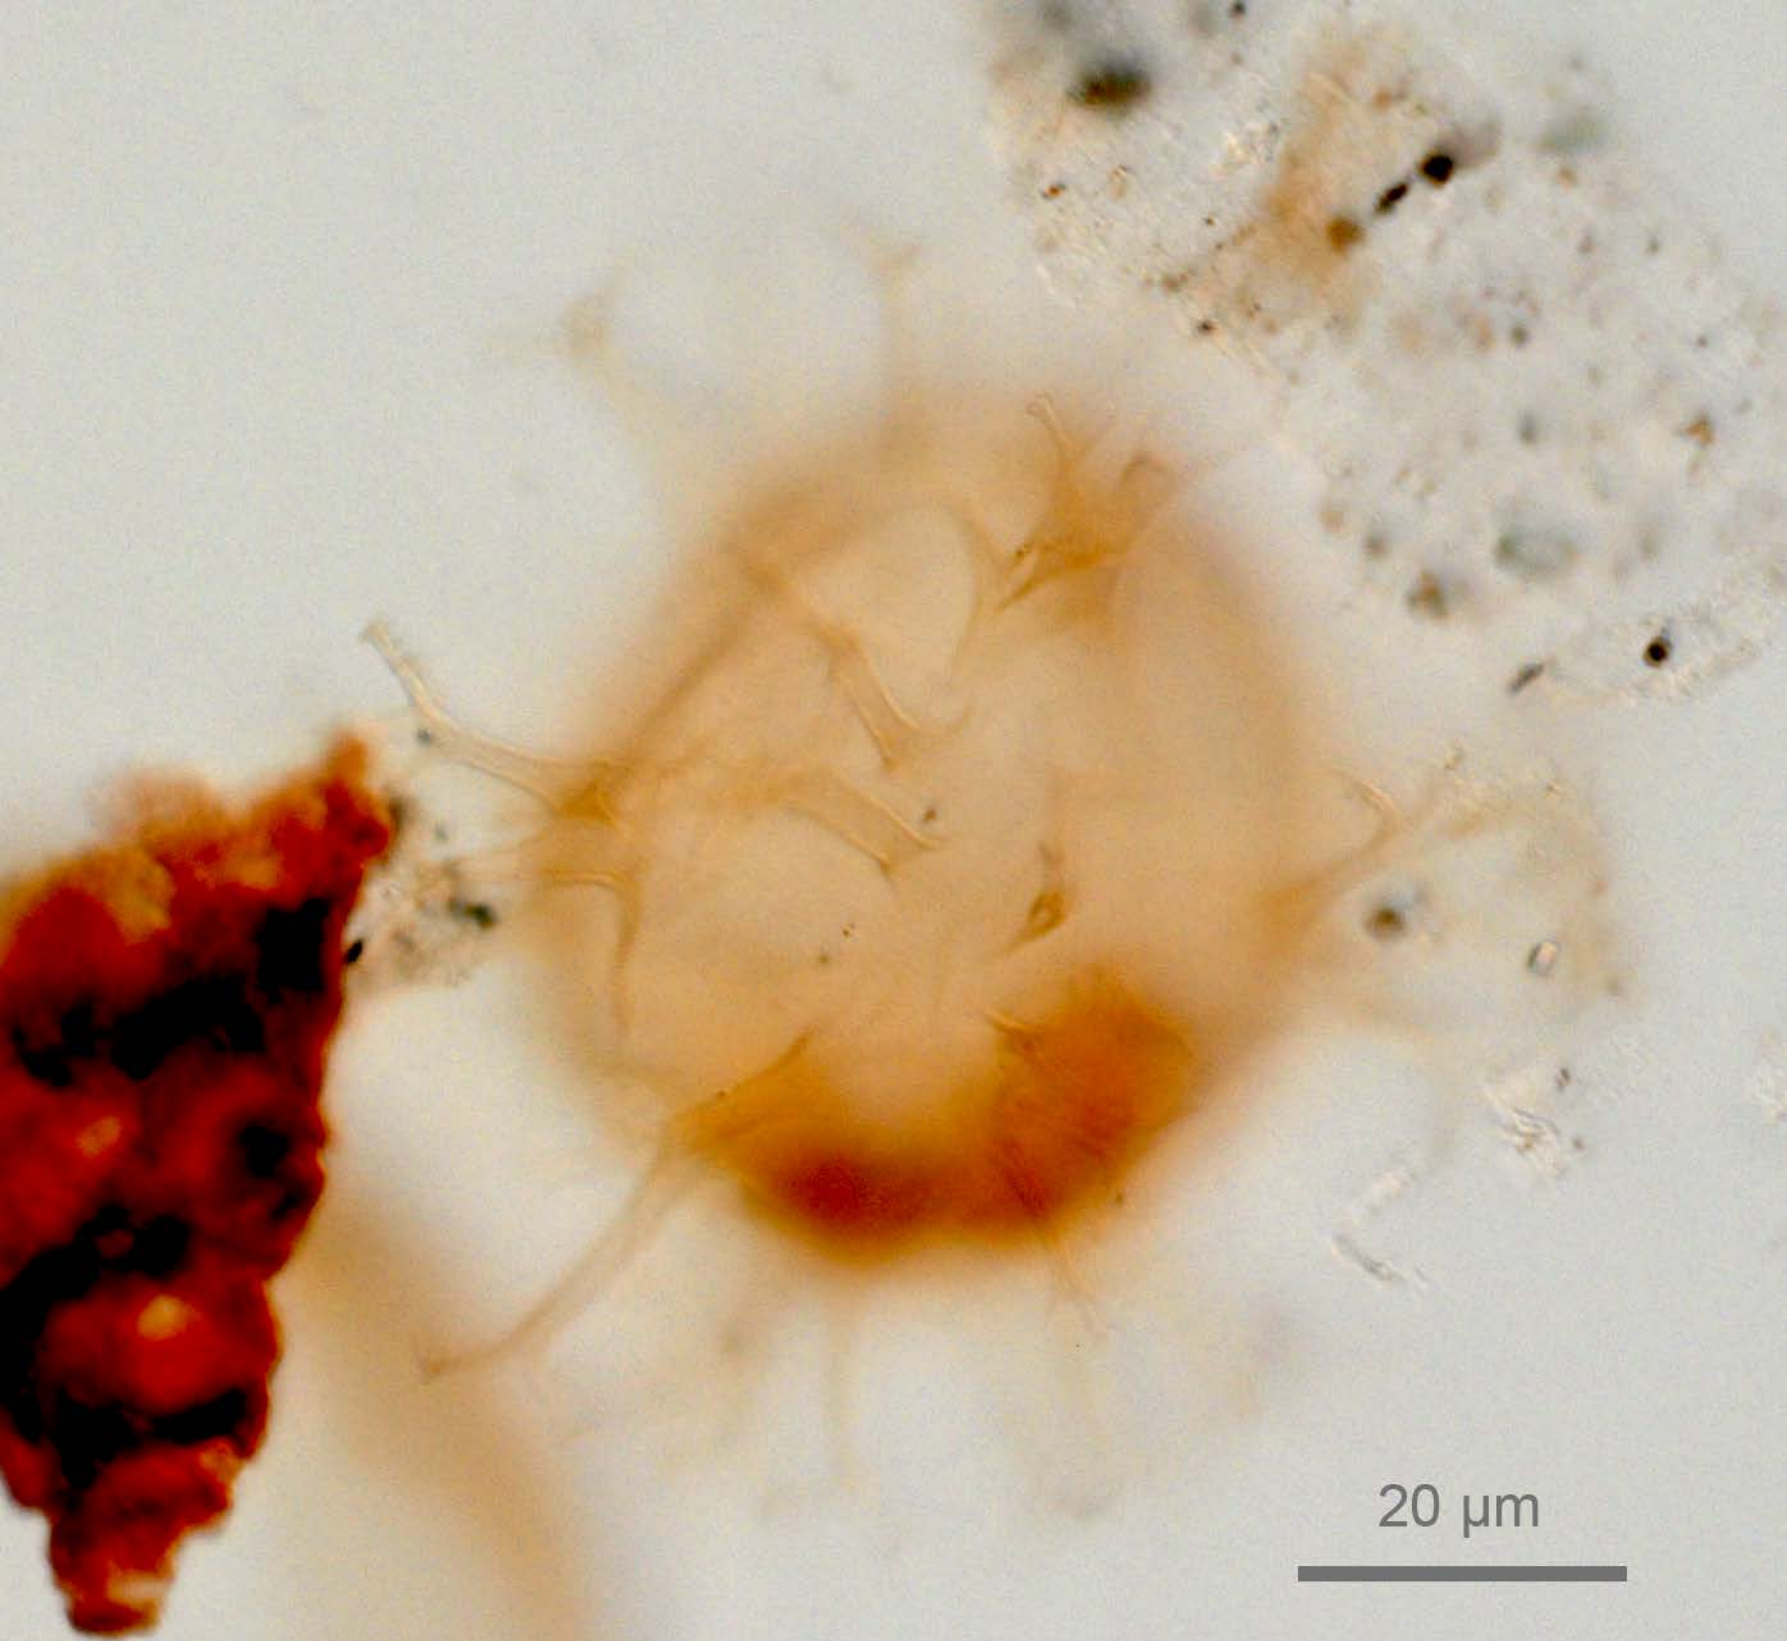

20  $\mu\text{m}$

*Spiniferites firmus* Matsuoka 1983 : holotype



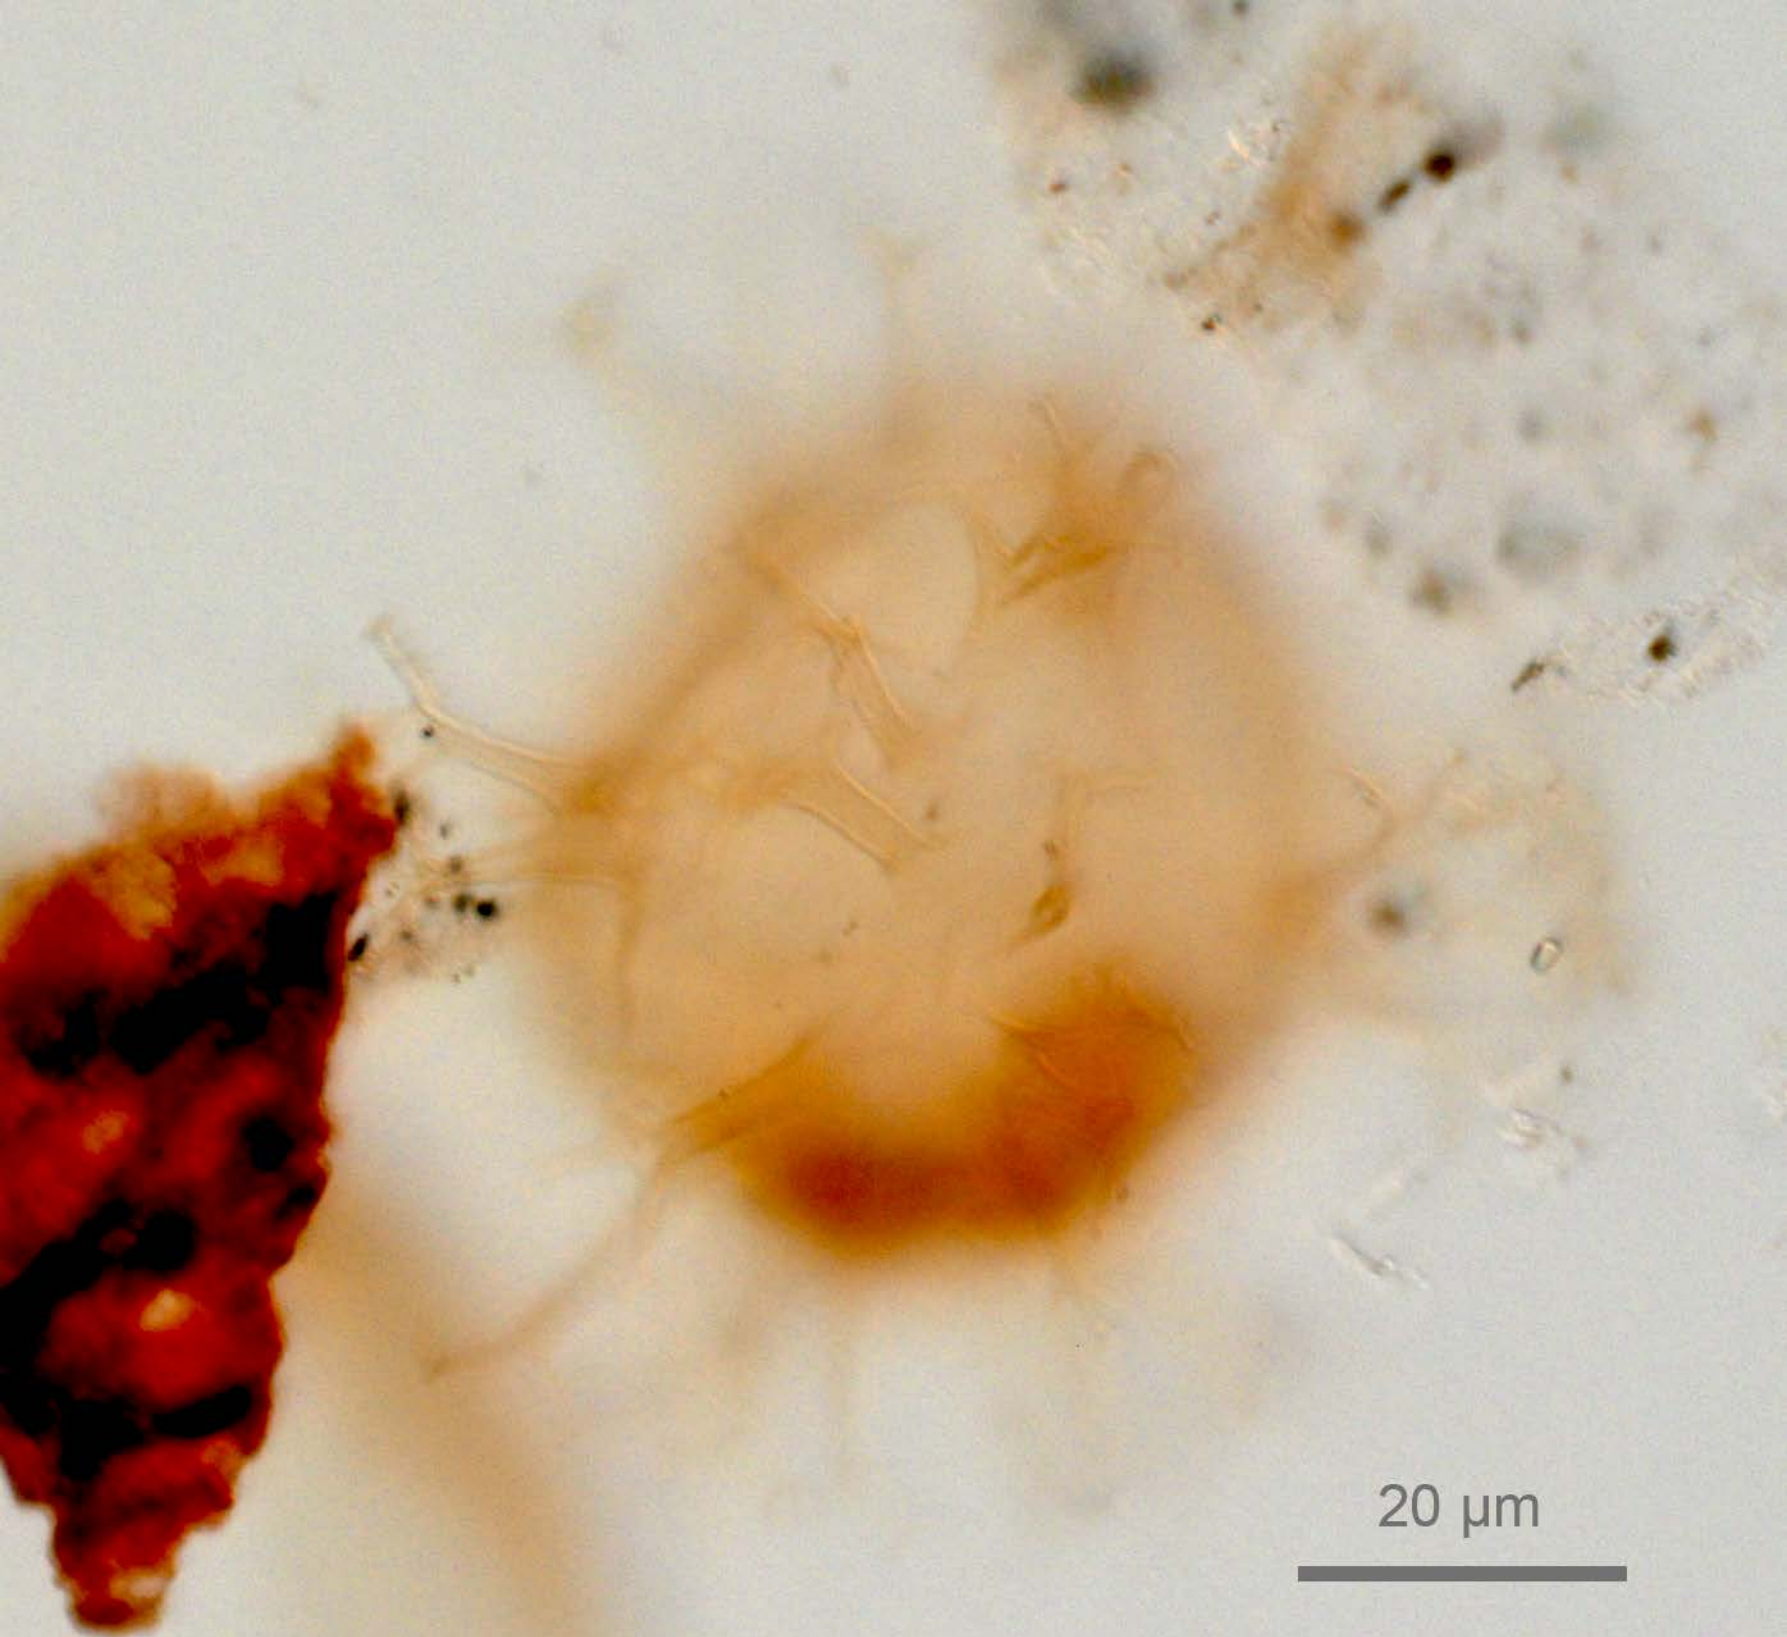

20  $\mu\text{m}$

*Spiniferites firmus* Matsuoka 1983 : holotype



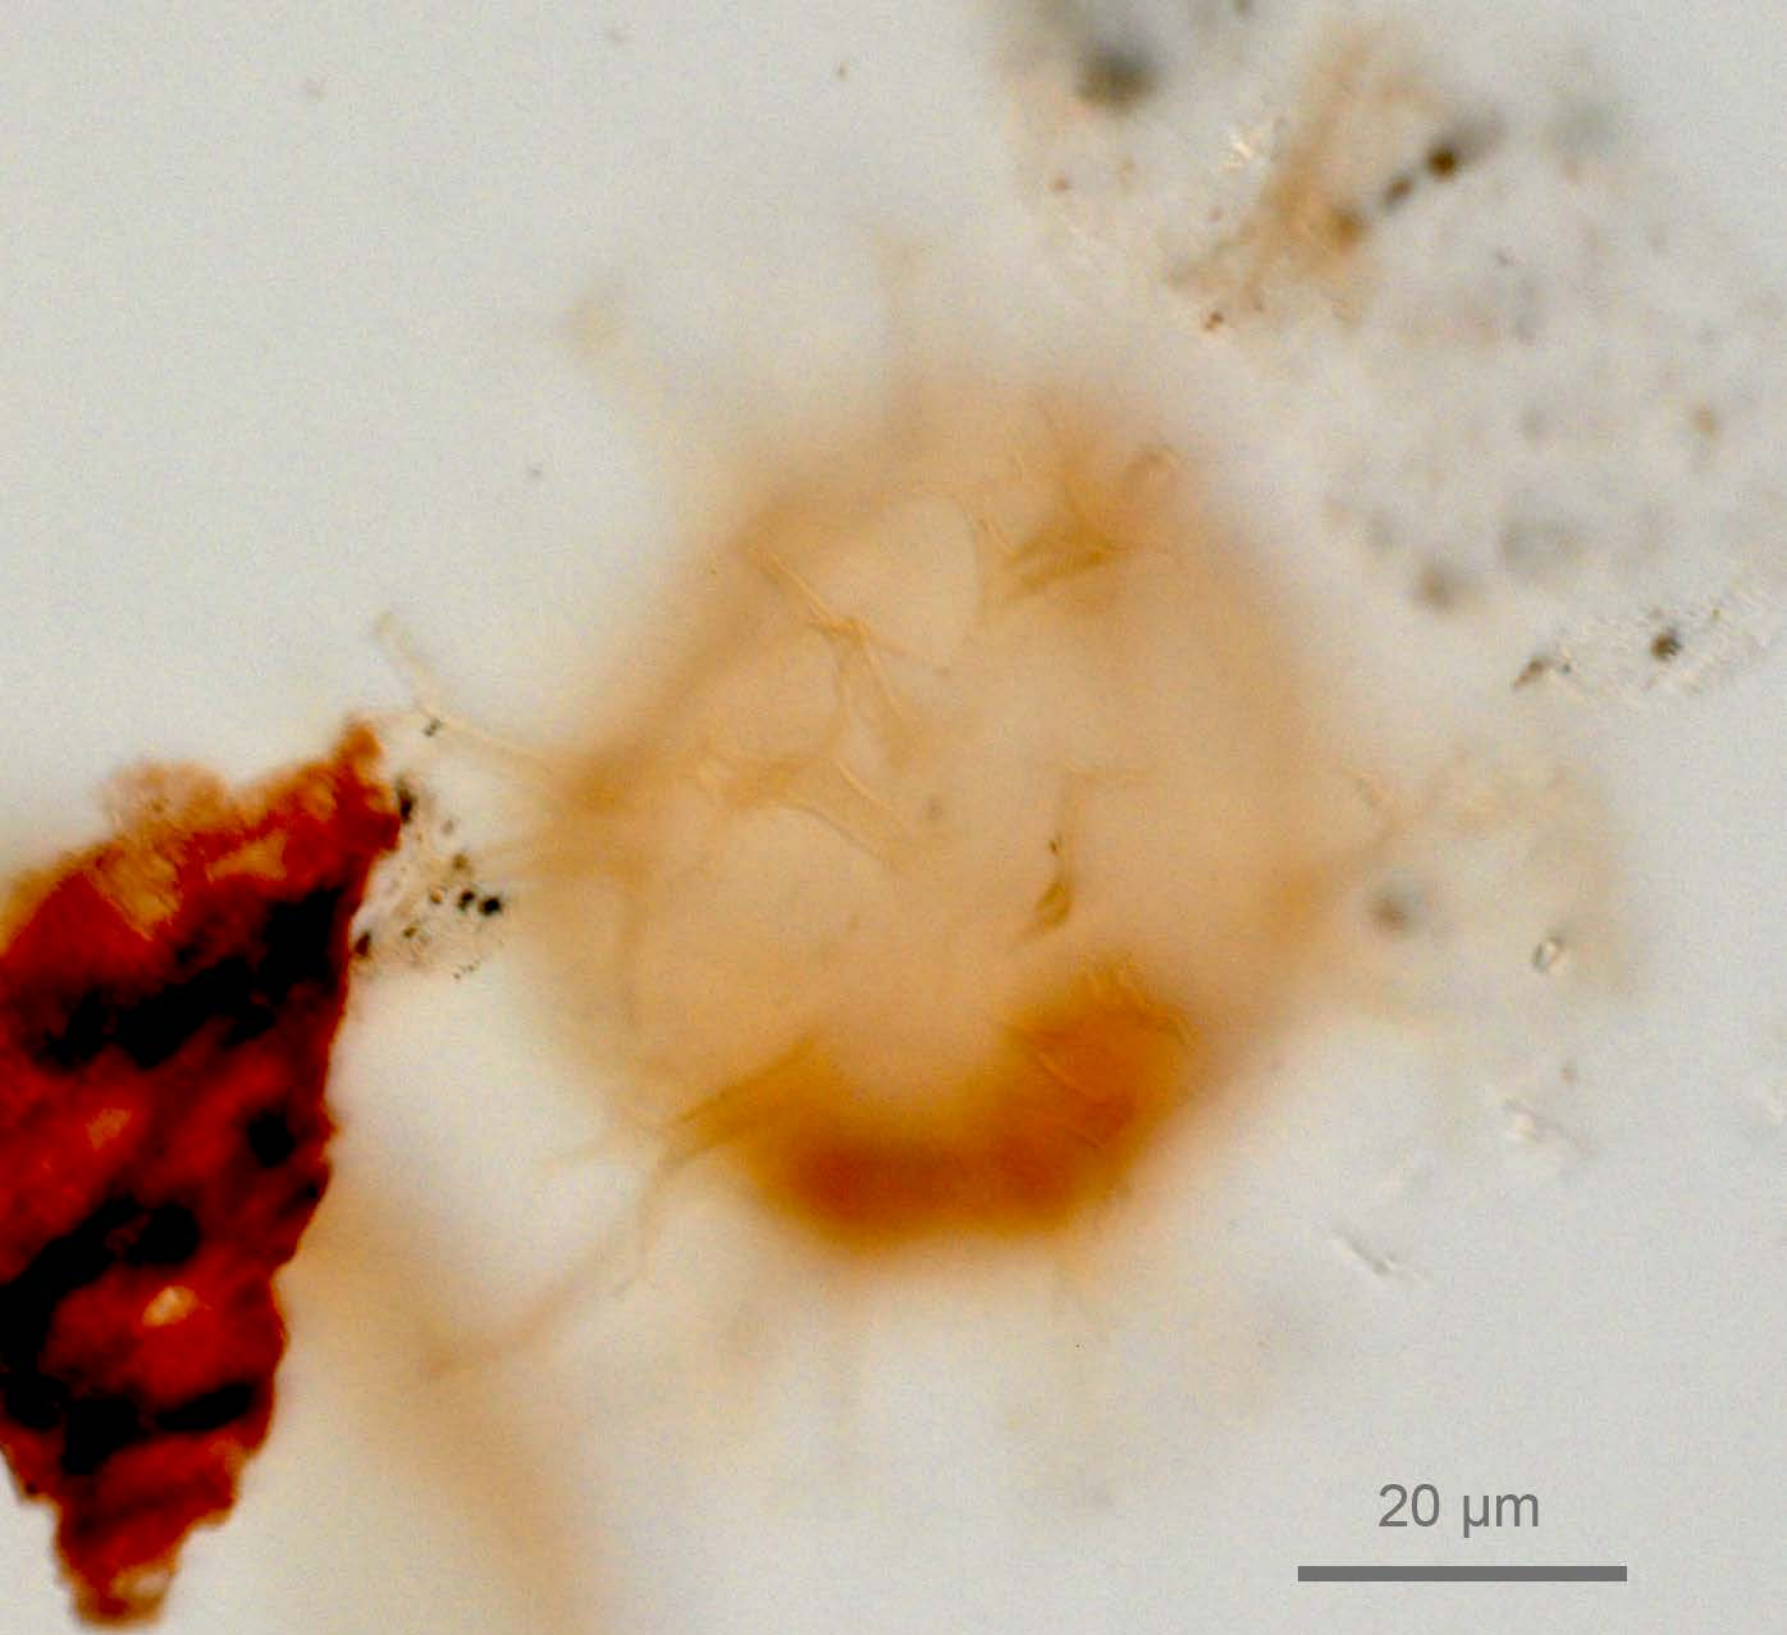

*Spiniferites firmus* Matsuoka 1983 : holotype



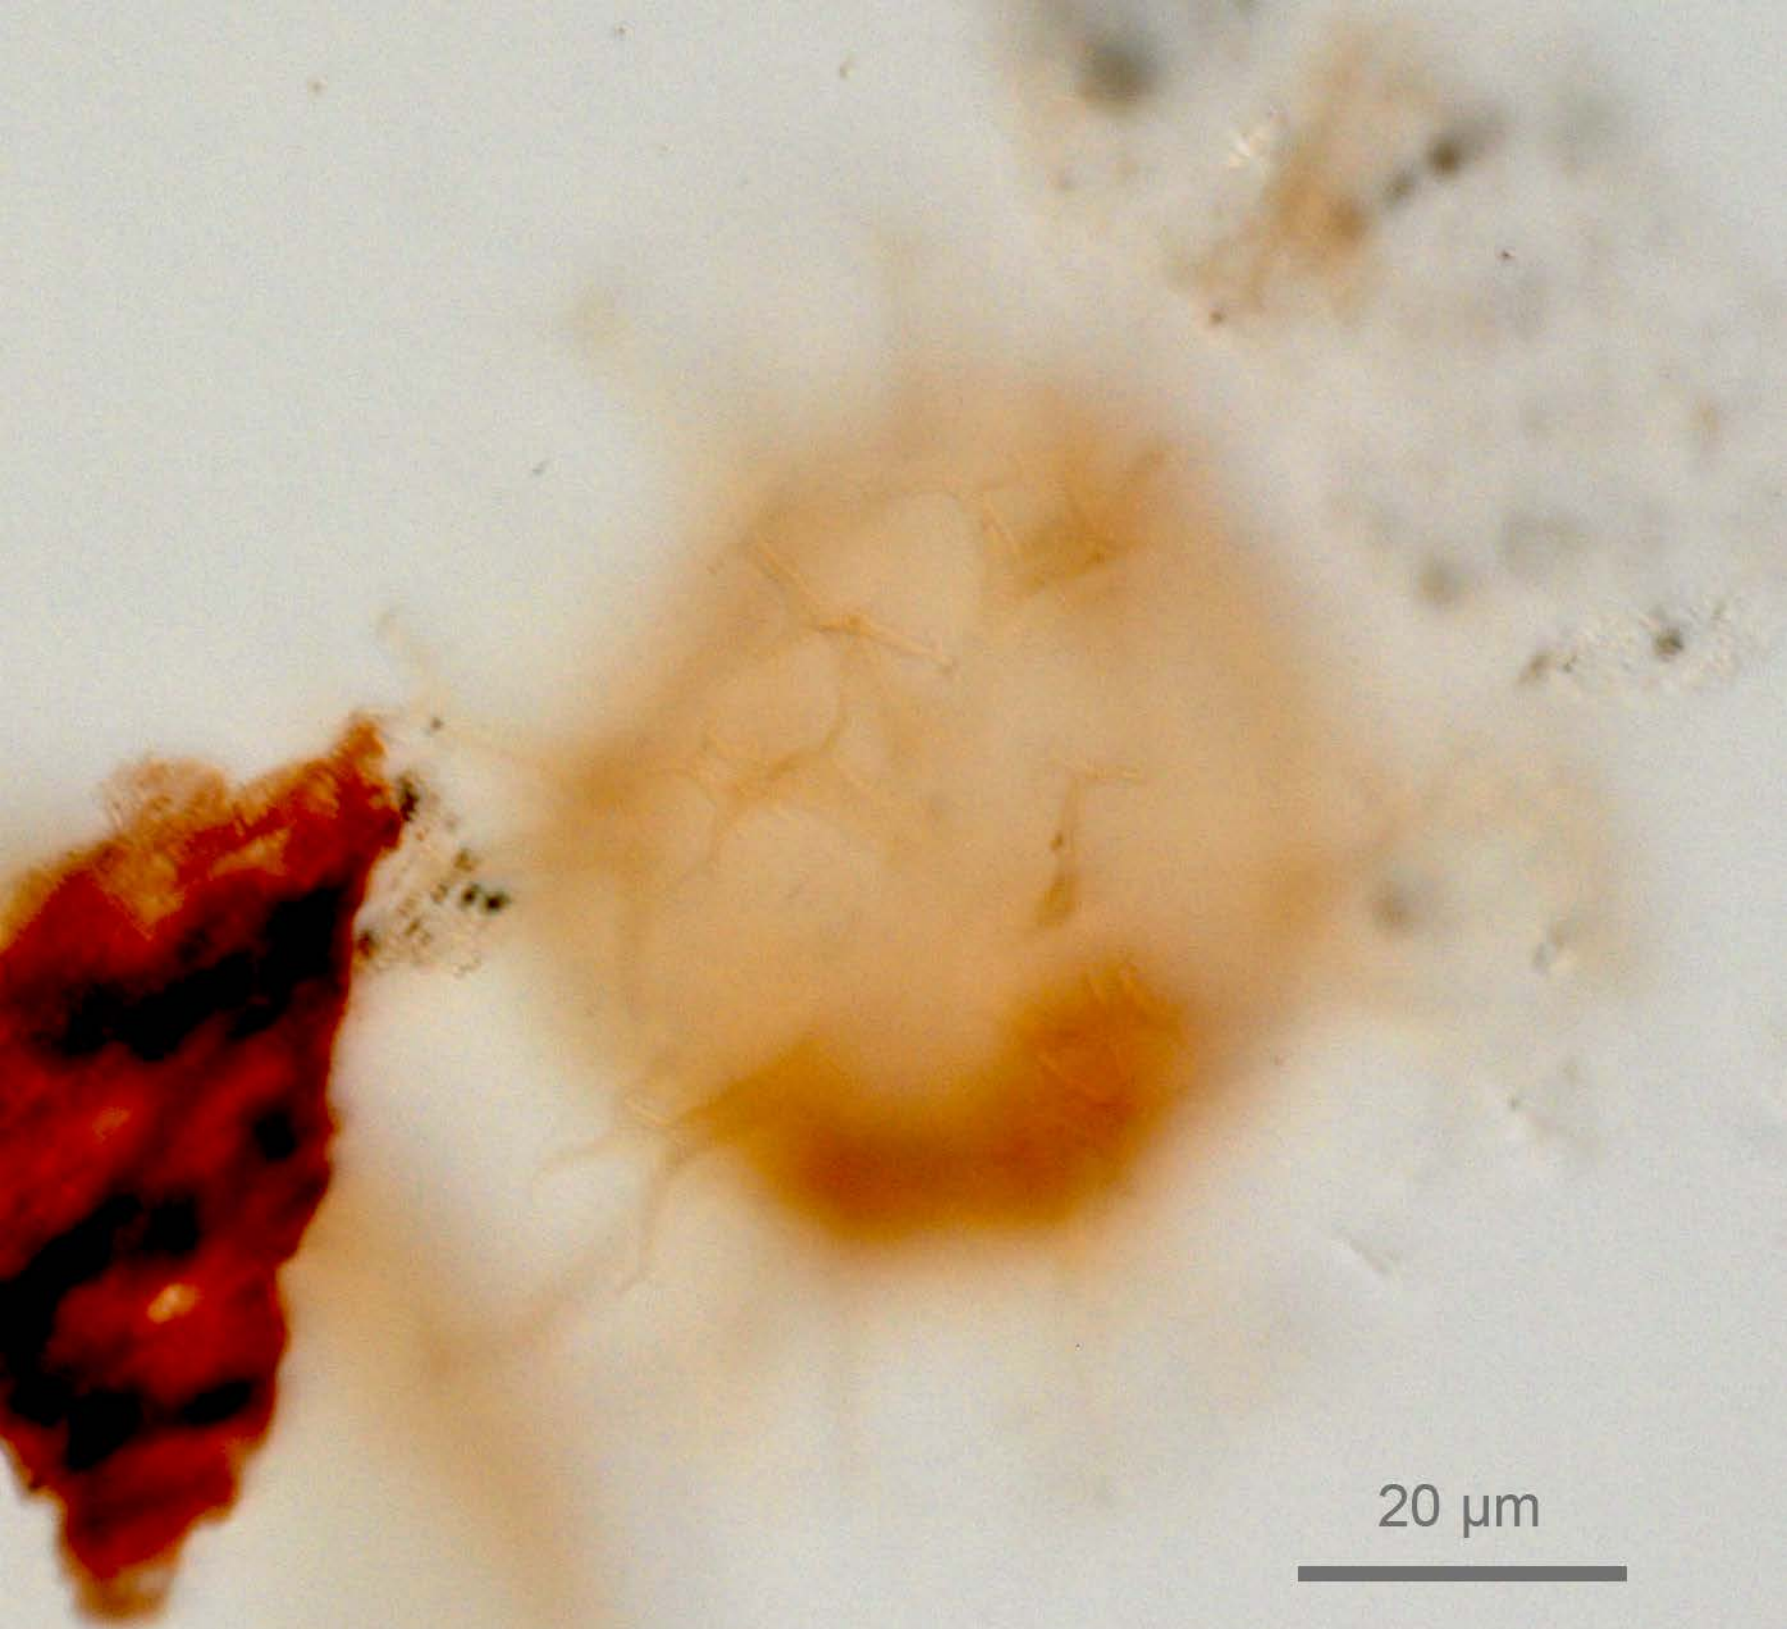

20  $\mu\text{m}$

*Spiniferites firmus* Matsuoka 1983 : holotype



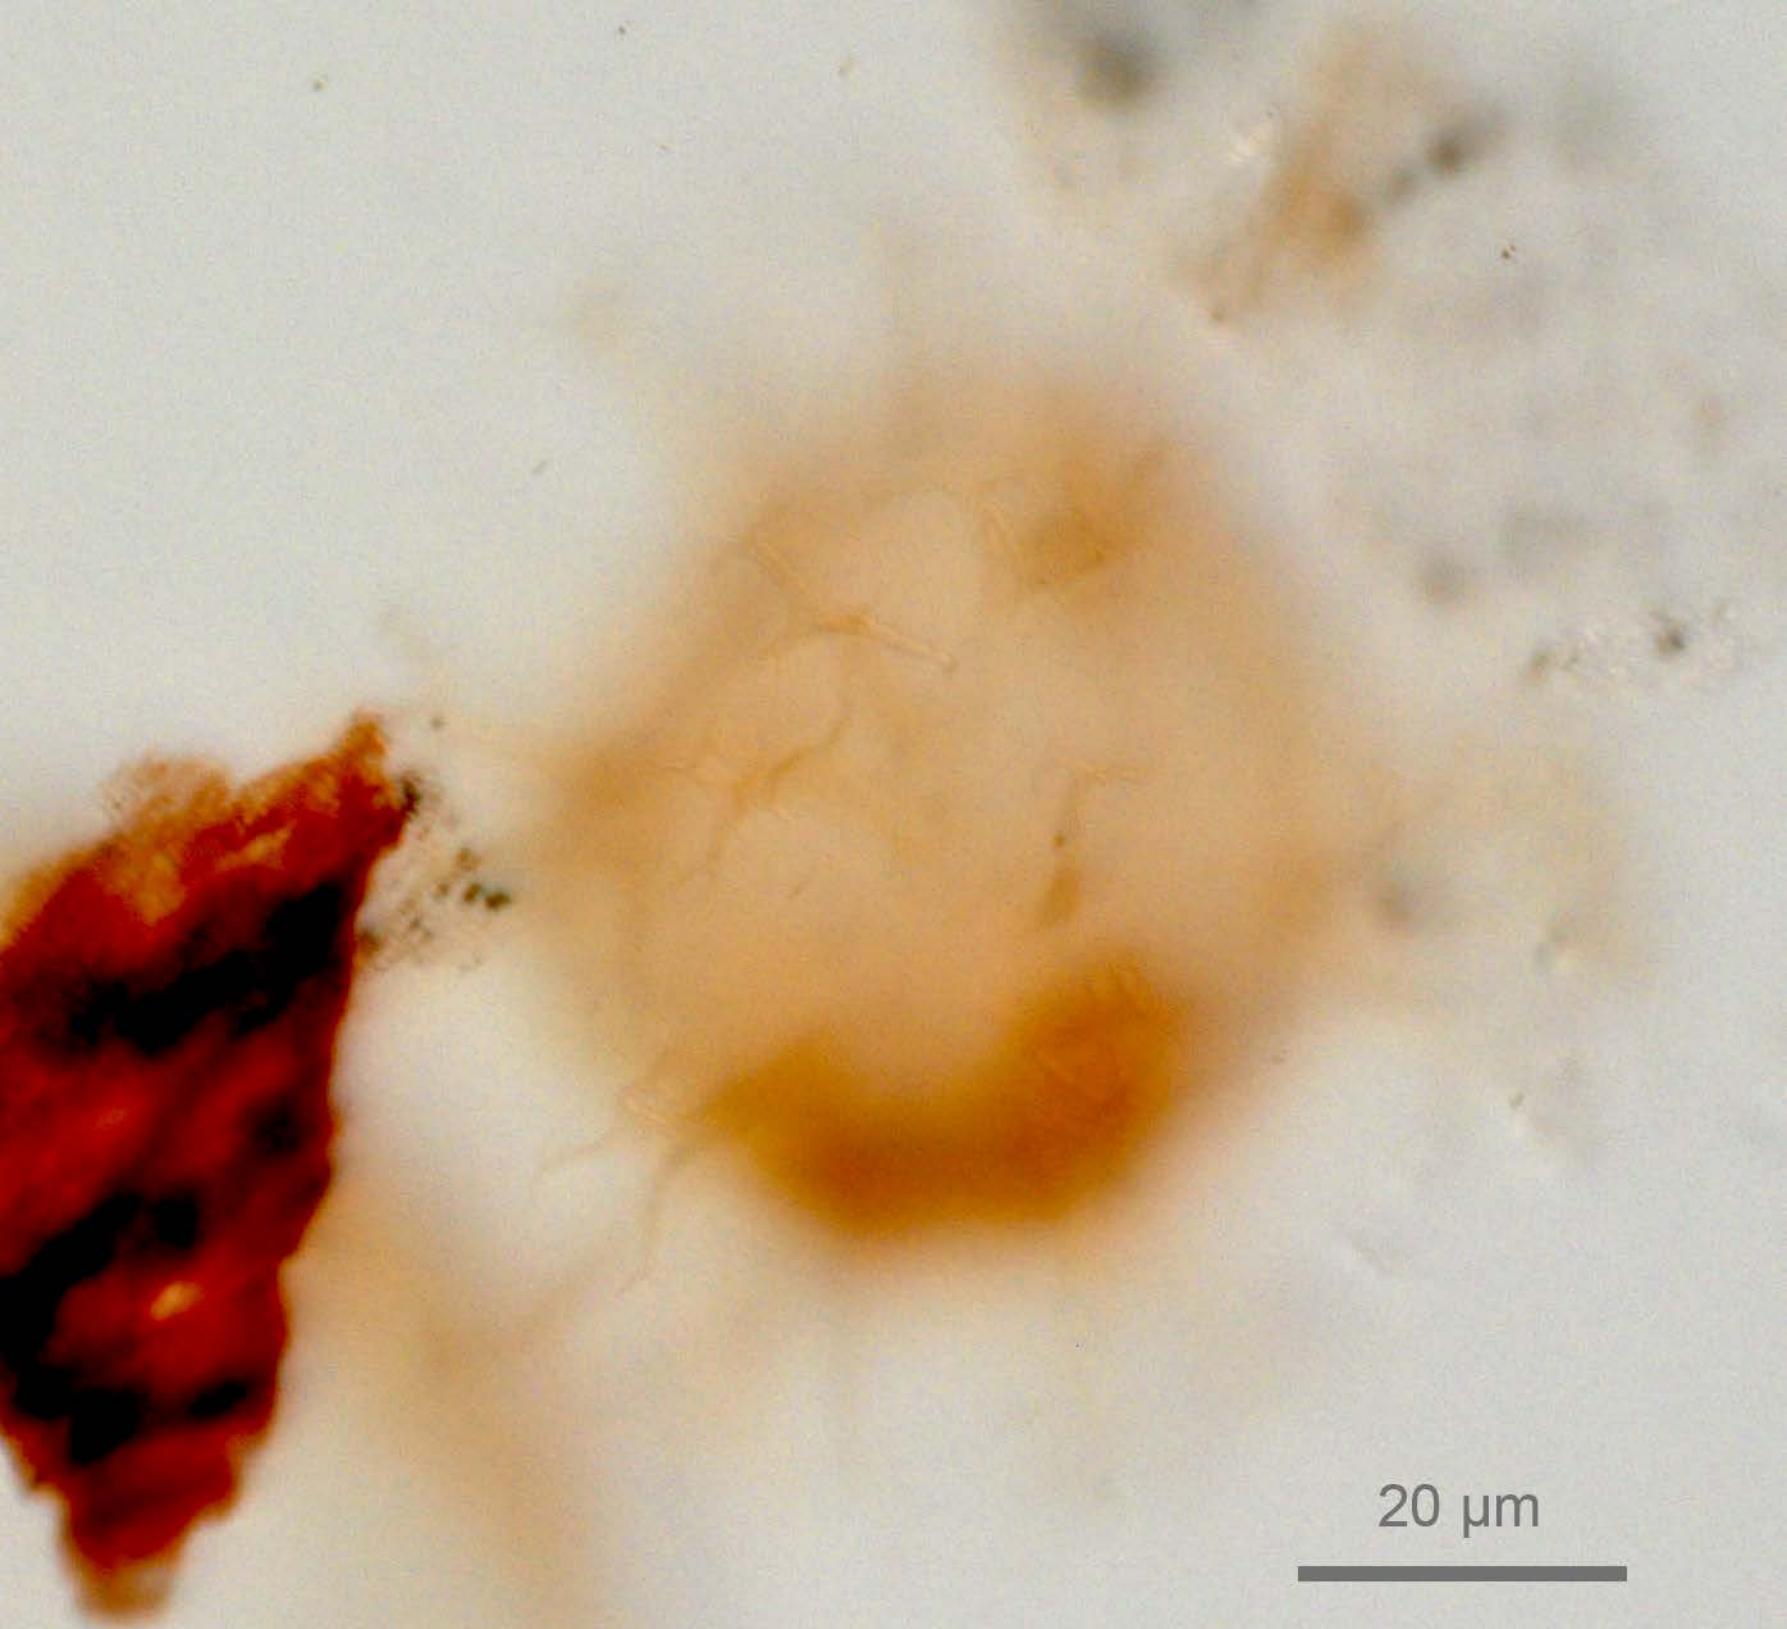

20  $\mu\text{m}$

*Spiniferites firmus* Matsuoka 1983 : holotype
