# Supplementary material
Source: publisher figshare collection journal article supplement (https://tandf.figshare.com/articles/dataset/_/7466618)
Supplement: Supplementary file 15 [file 1]

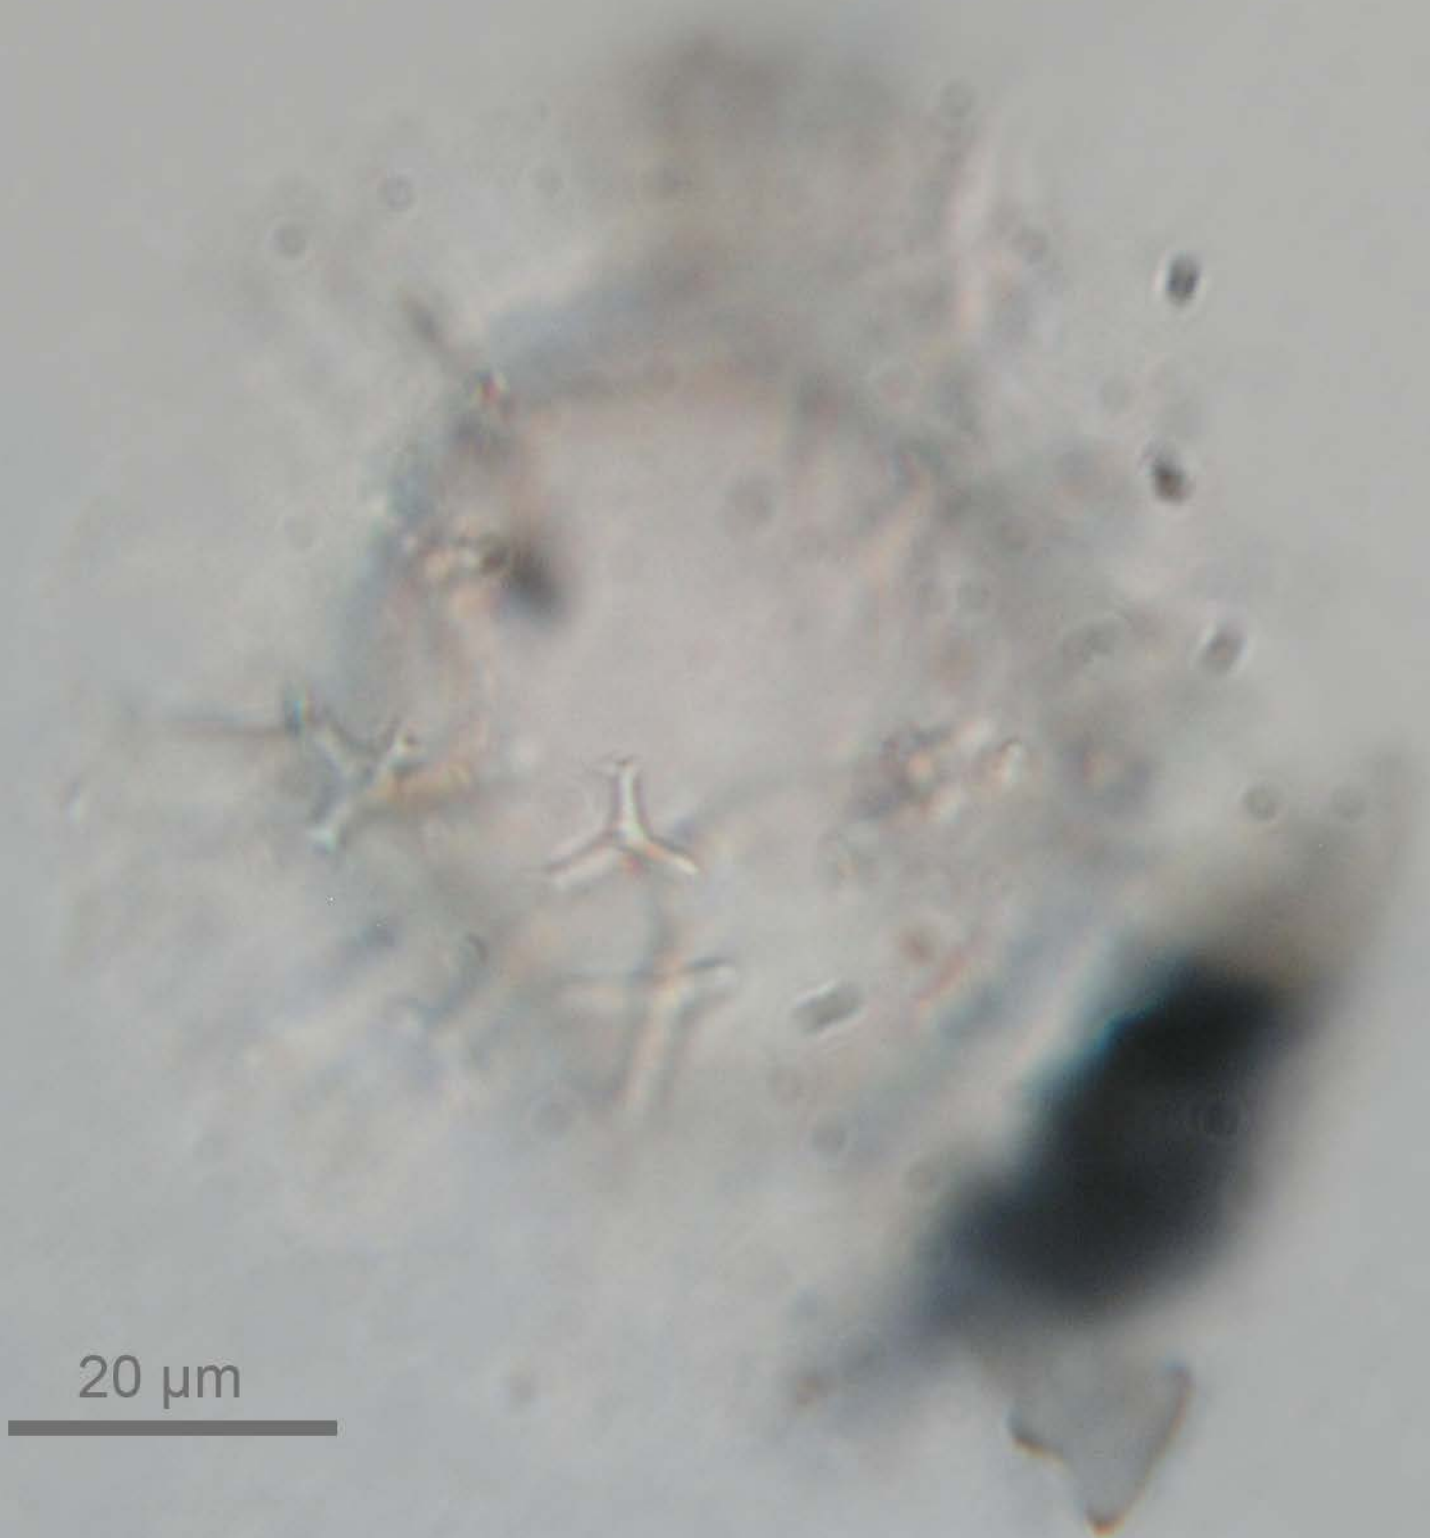

*Spiniferites mirabilis* (Rossignol 1964) Sarjeant 1970  
characteristical specimen

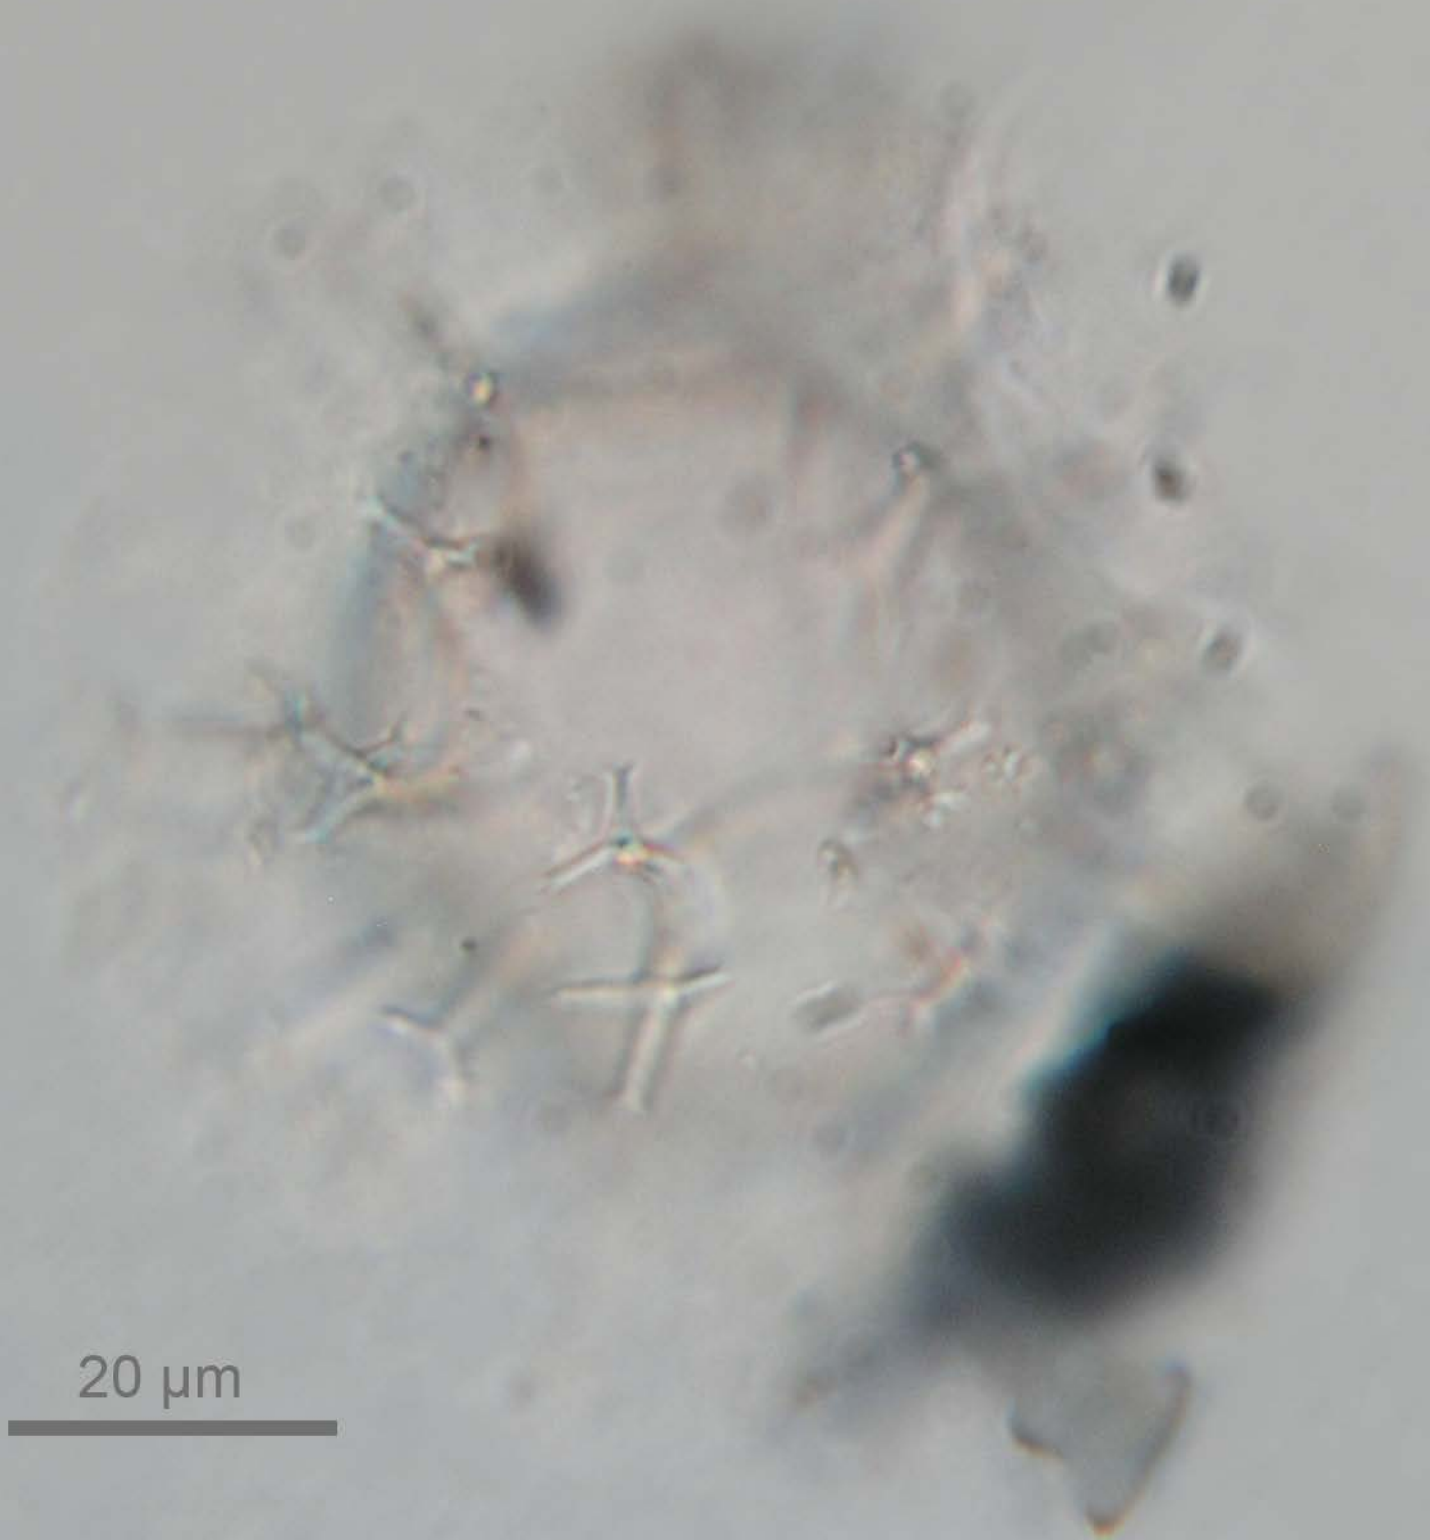

*Spiniferites mirabilis* (Rossignol 1964) Sarjeant 1970  
characteristical specimen

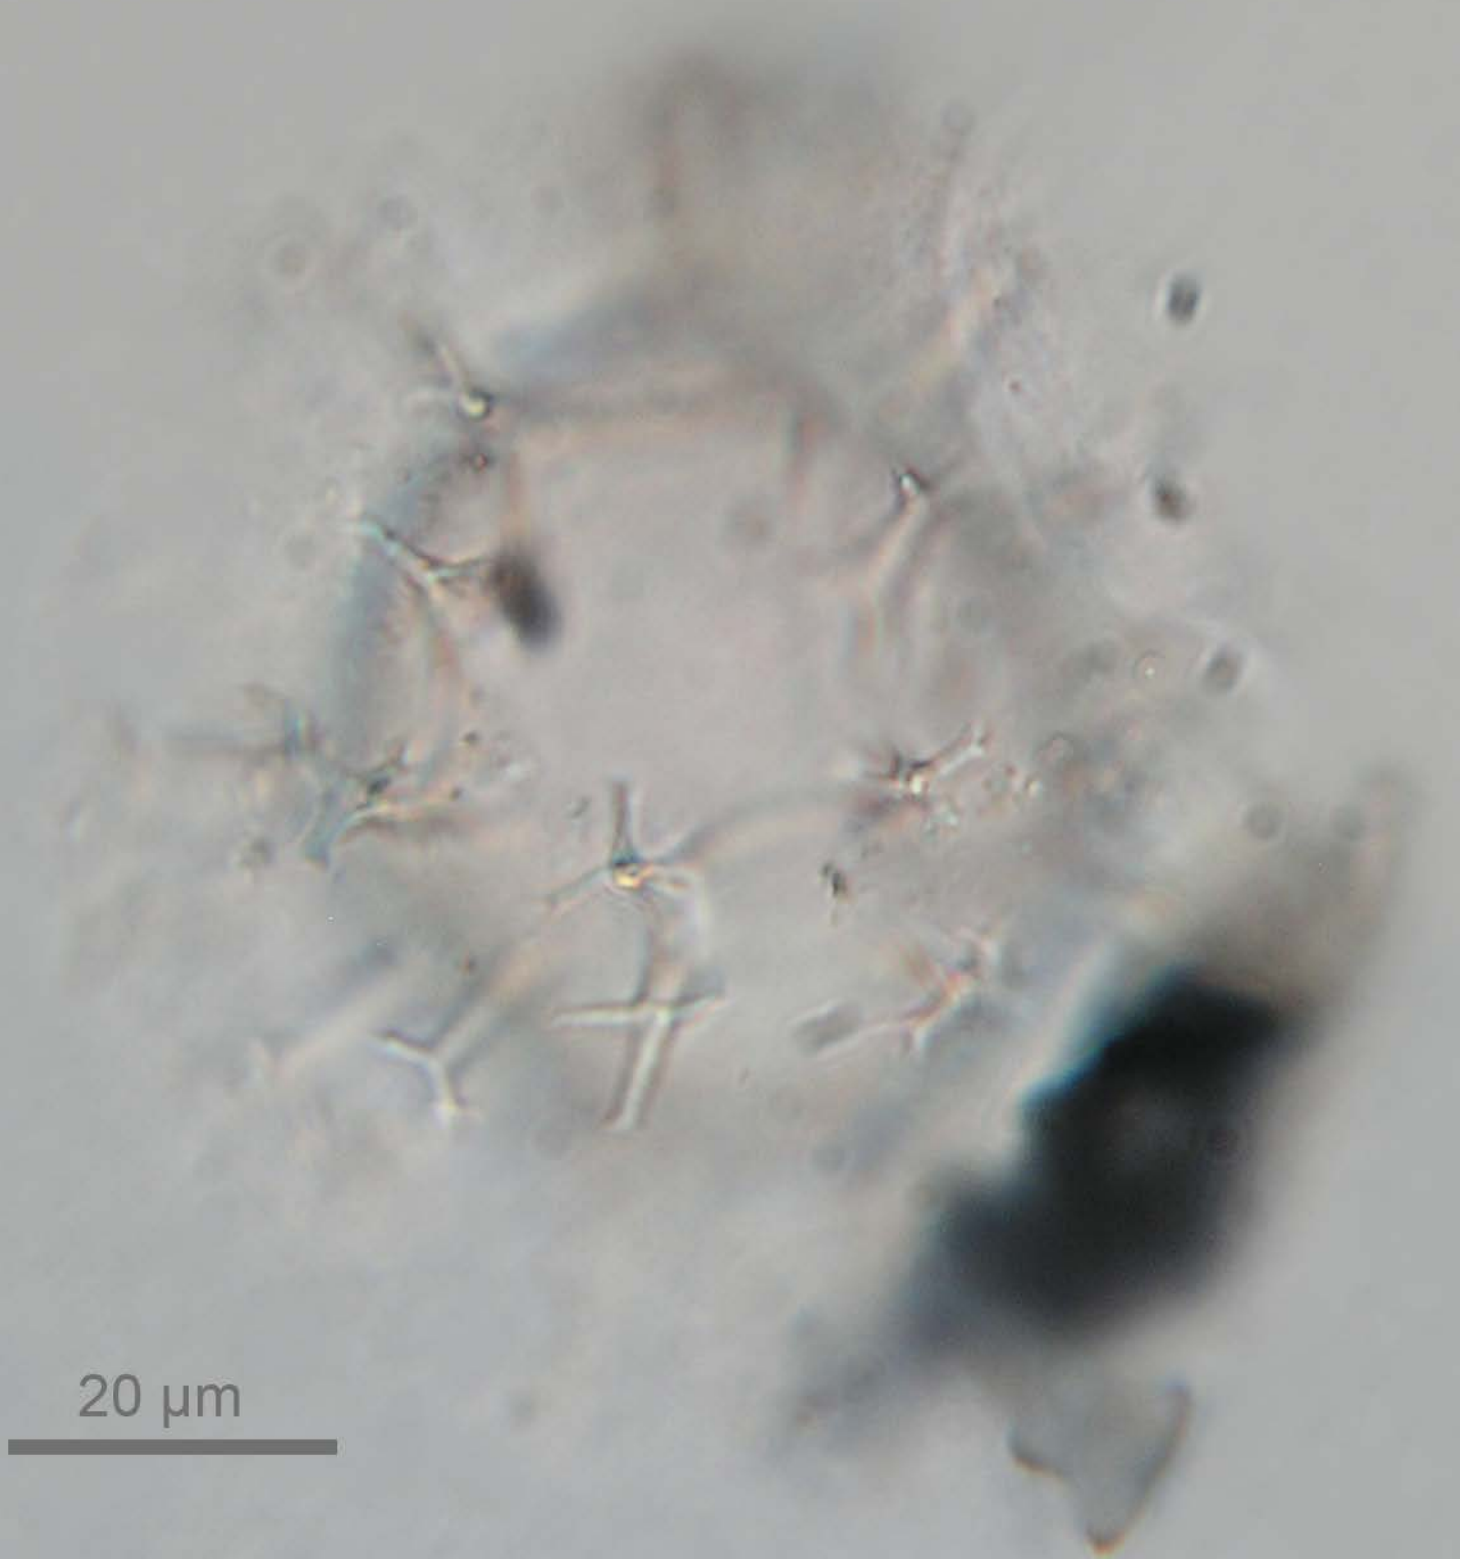

20  $\mu\text{m}$

*Spiniferites mirabilis* (Rossignol 1964) Sarjeant 1970  
characteristical specimen

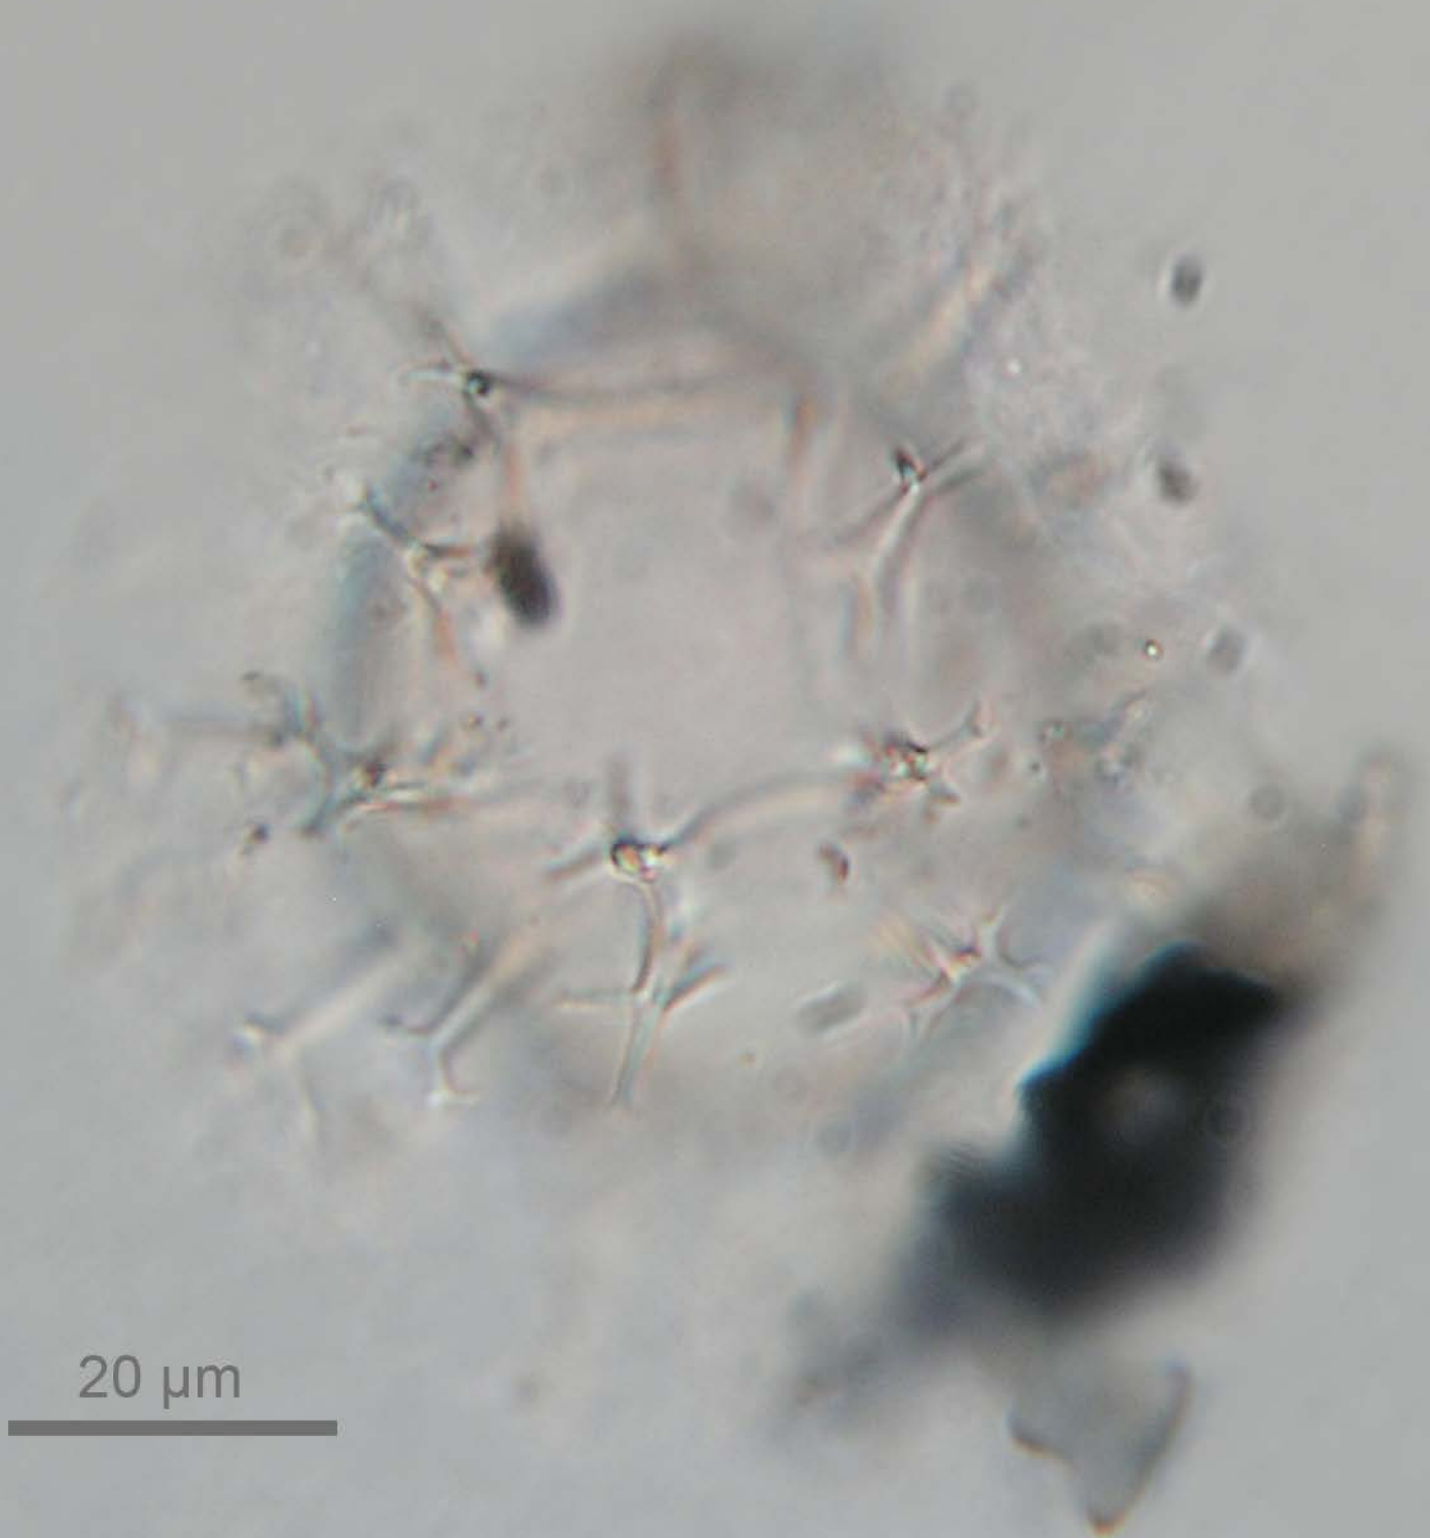

20  $\mu\text{m}$

*Spiniferites mirabilis* (Rossignol 1964) Sarjeant 1970  
characteristical specimen

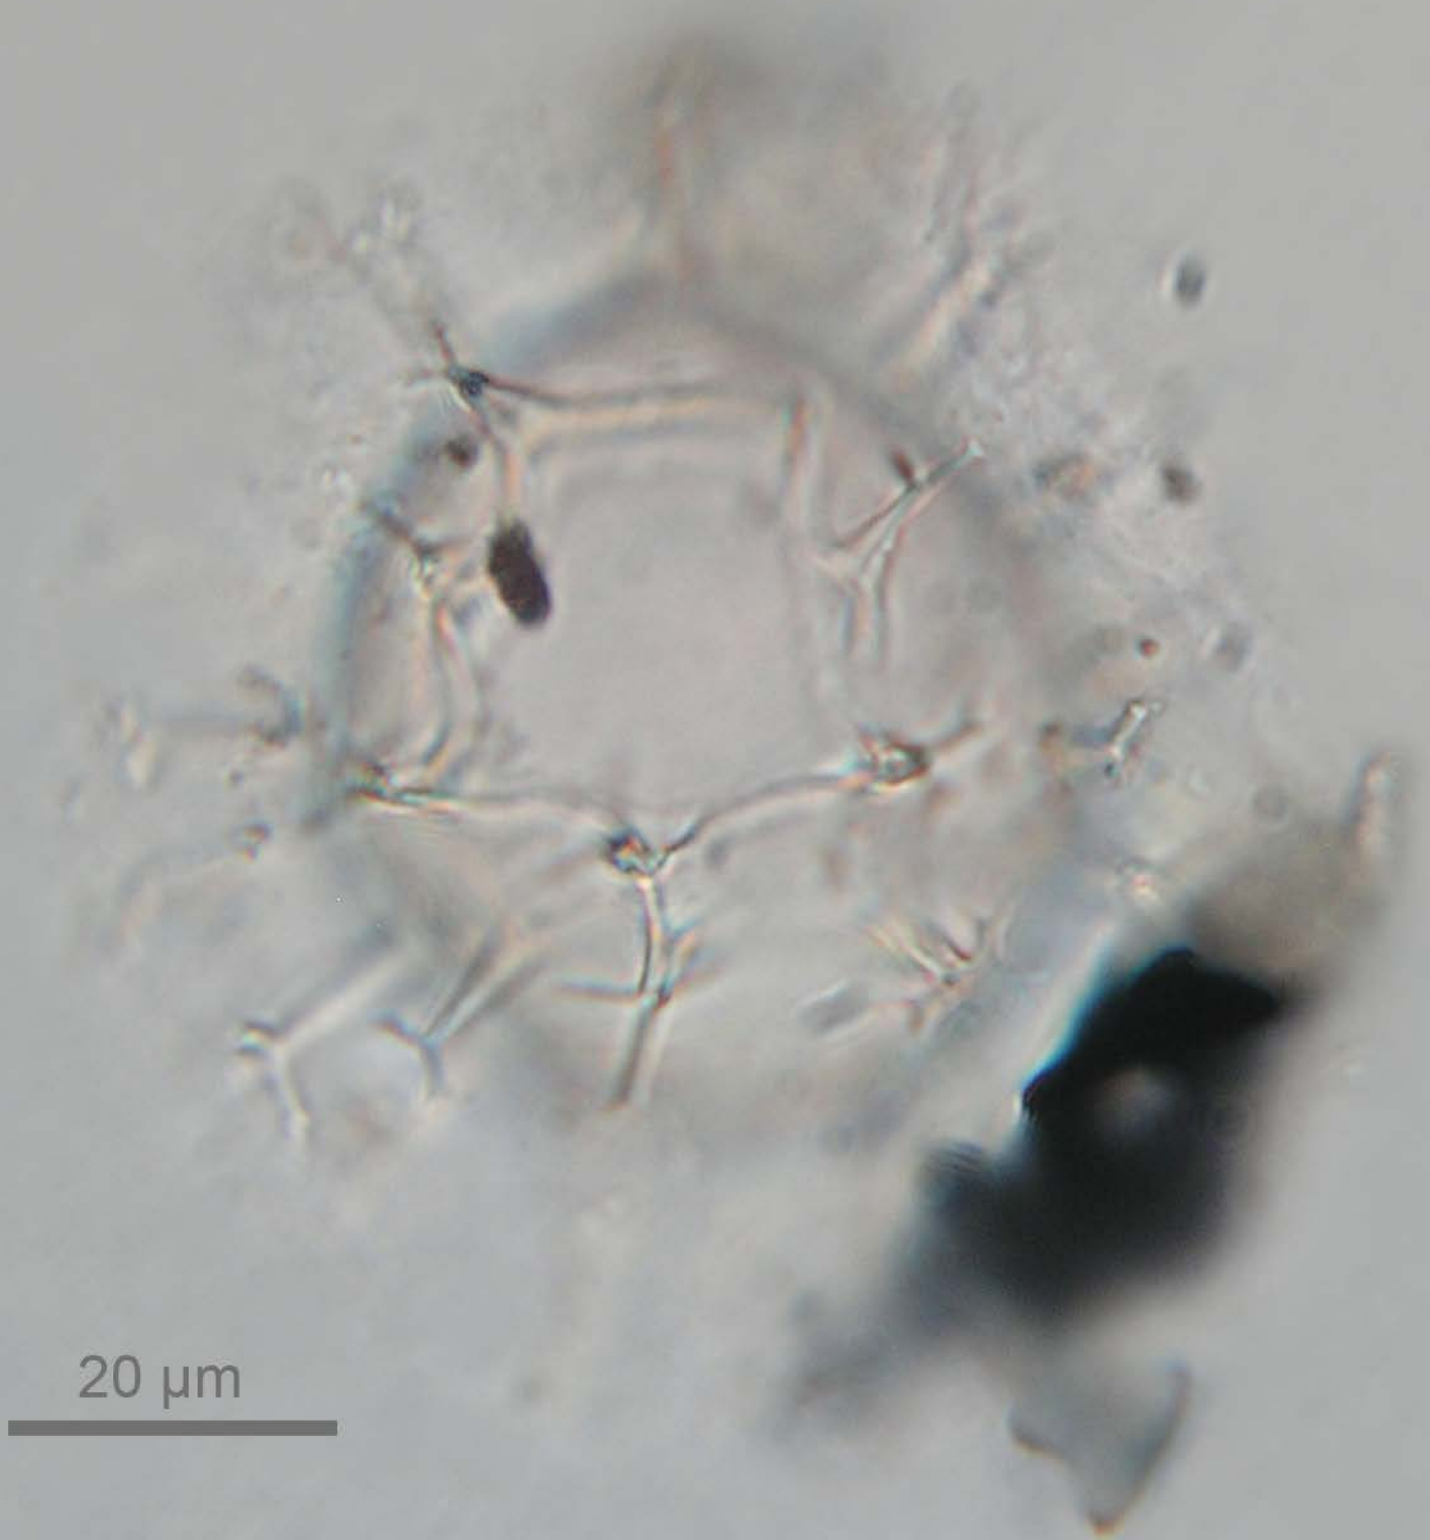

20  $\mu\text{m}$

*Spiniferites mirabilis* (Rossignol 1964) Sarjeant 1970  
characteristical specimen



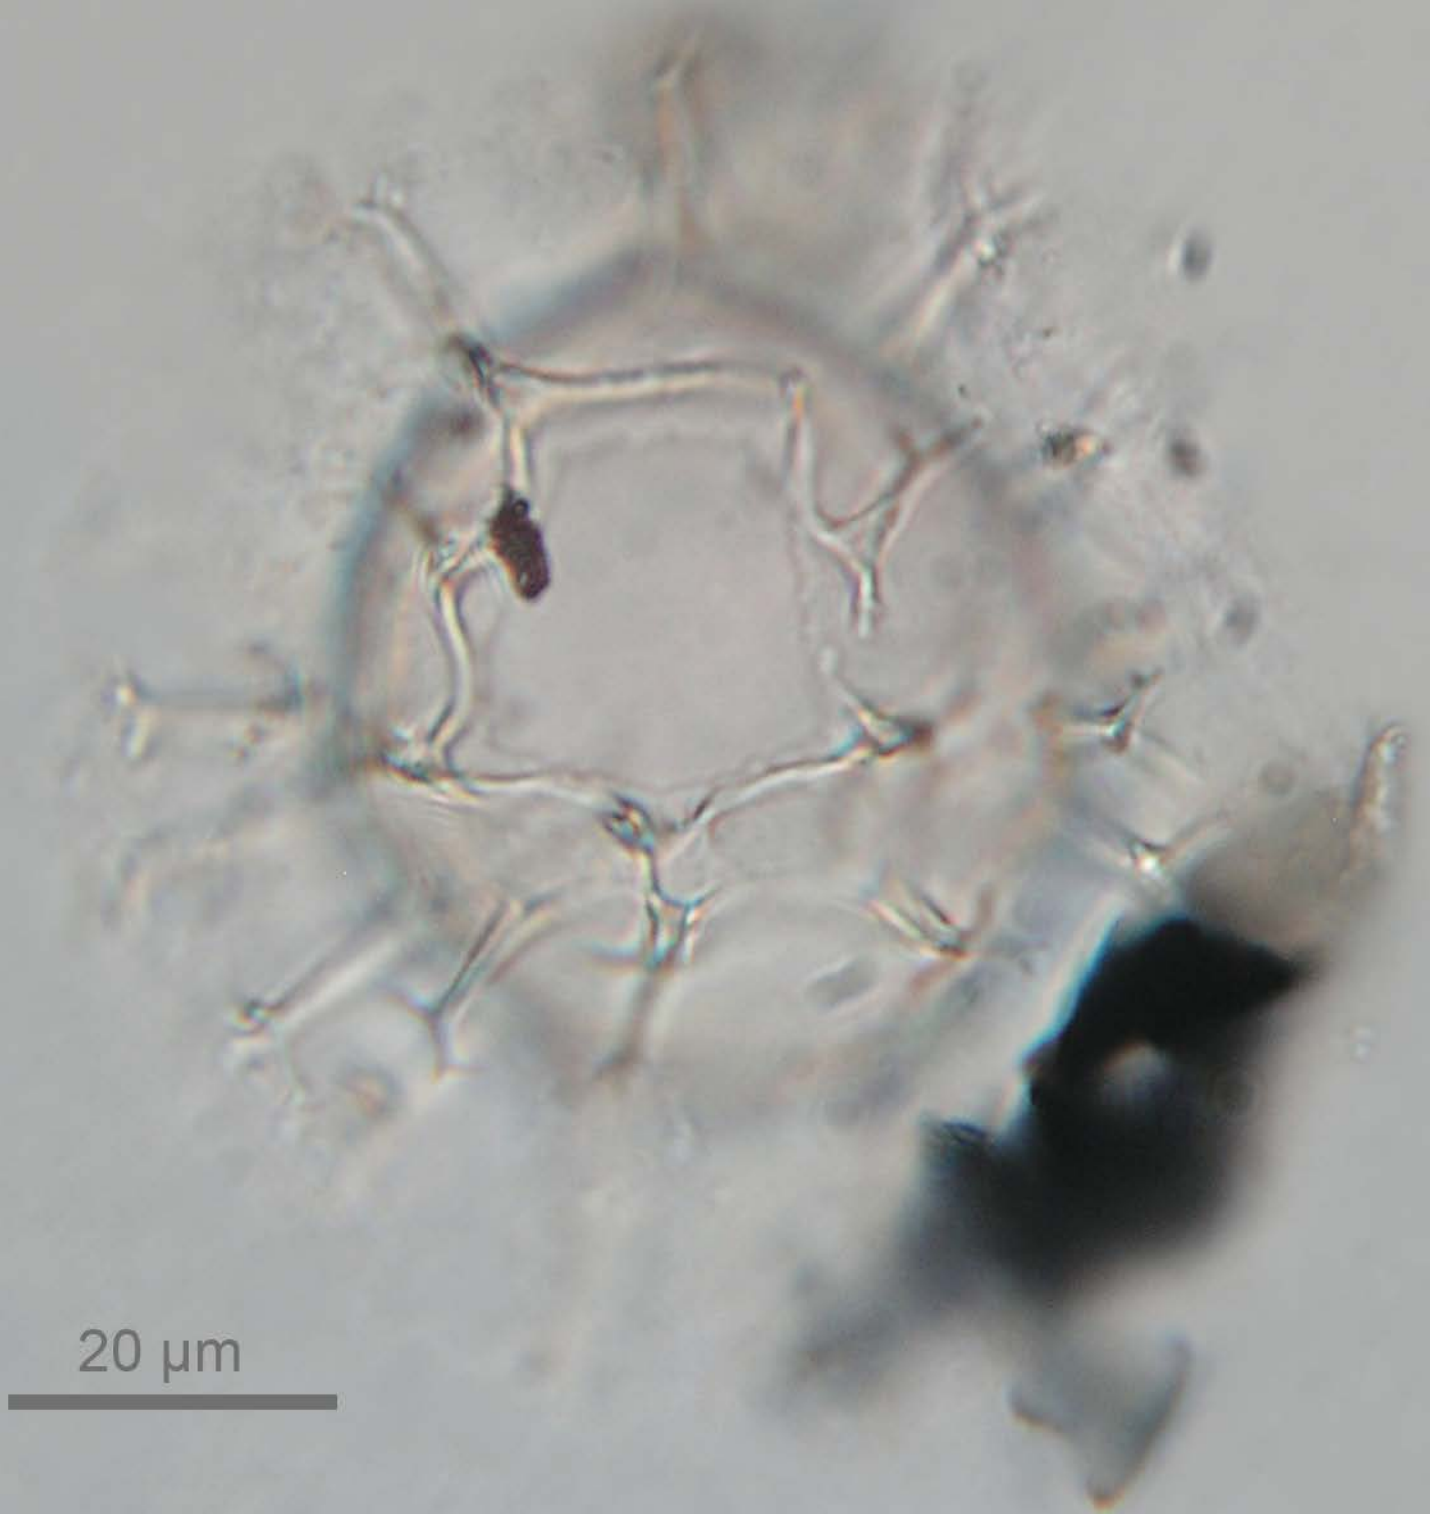

*Spiniferites mirabilis* (Rossignol 1964) Sarjeant 1970  
characteristical specimen

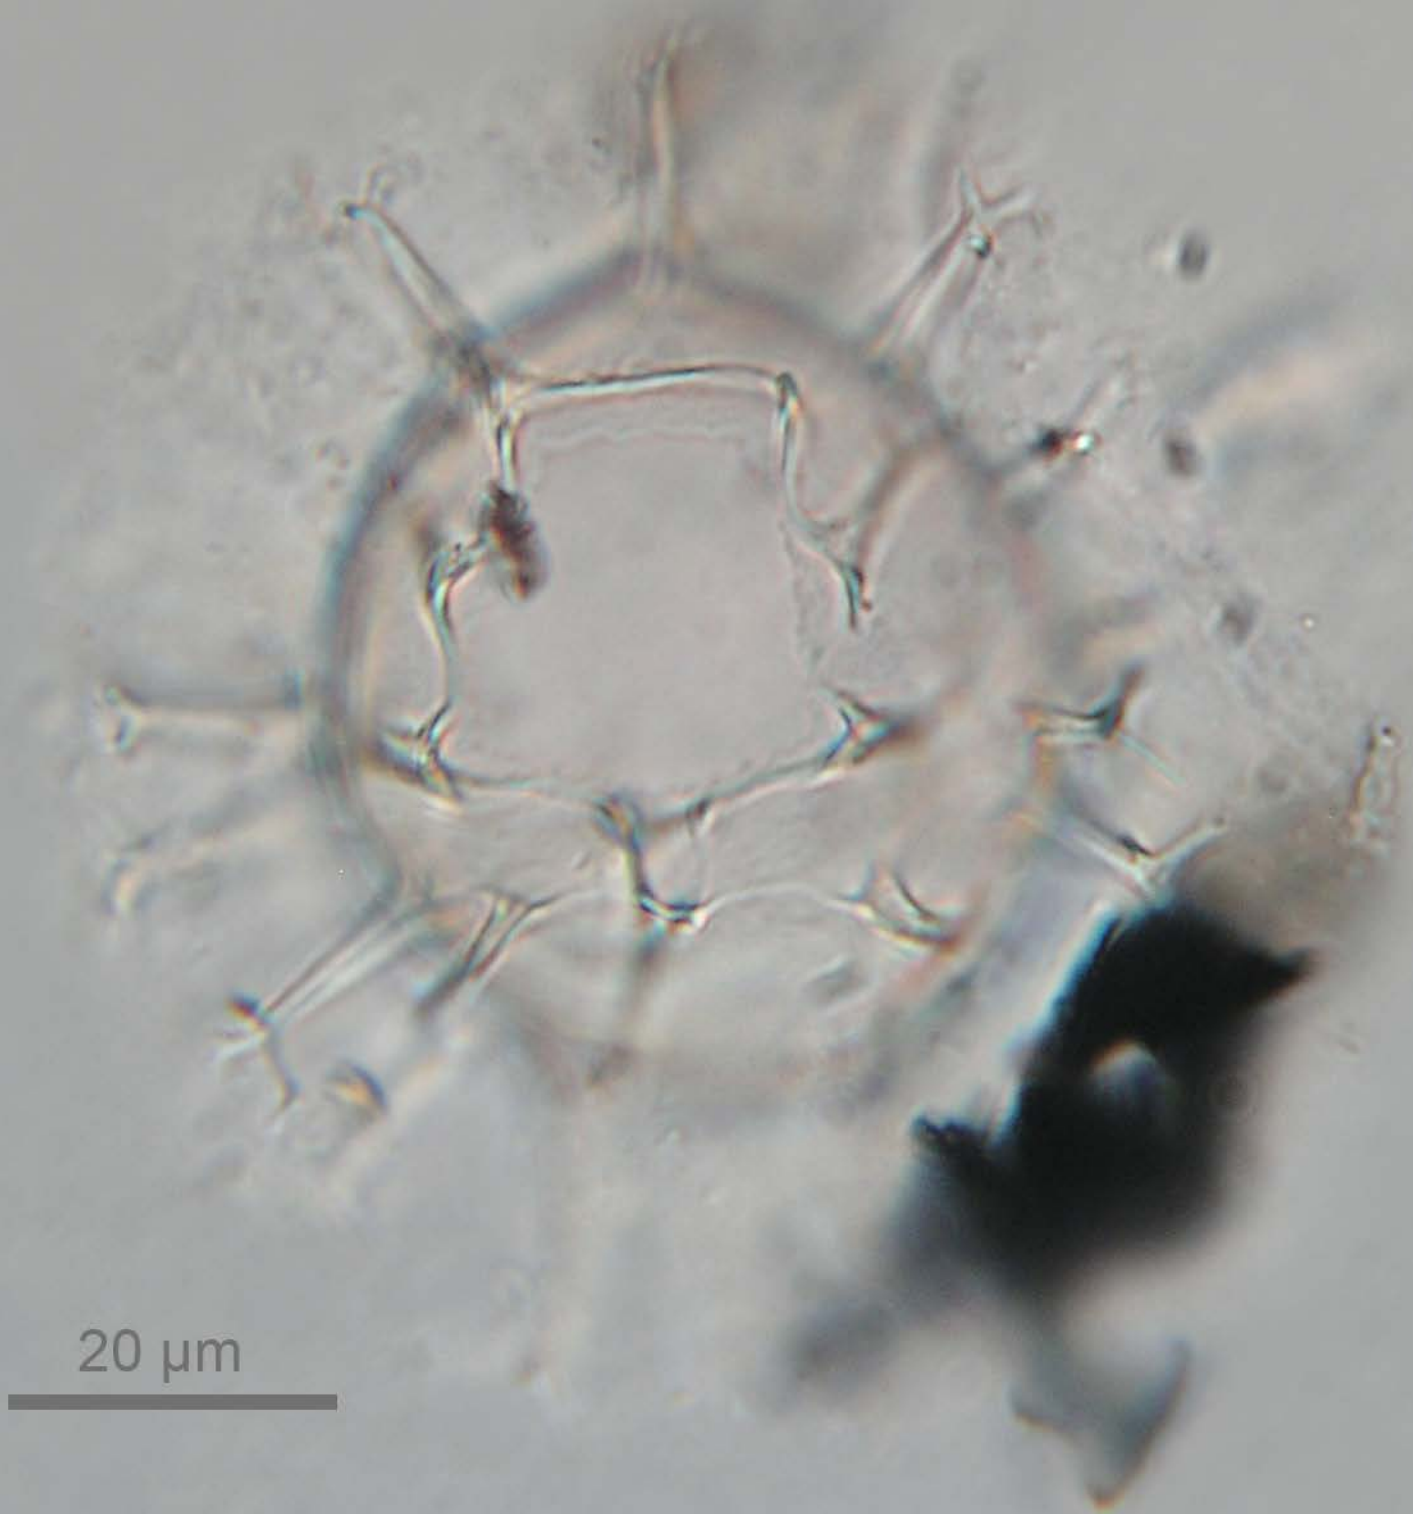

20 μm

*Spiniferites mirabilis* (Rossignol 1964) Sarjeant 1970  
characteristical specimen

A light micrograph of a single, large, circular microfossil. The fossil has a central, clear, circular area surrounded by a thick, multi-layered wall. The wall is composed of numerous small, elongated, and slightly curved segments that form a complex, star-like or web-like pattern. The segments are light brown or tan in color. In the lower right corner, there is a dark, irregular, and somewhat elongated object, possibly a piece of debris or another microfossil. A scale bar is located in the bottom left corner, consisting of a horizontal line with the text "20 μm" above it.

20 μm

*Spiniferites mirabilis* (Rossignol 1964) Sarjeant 1970  
characteristical specimen



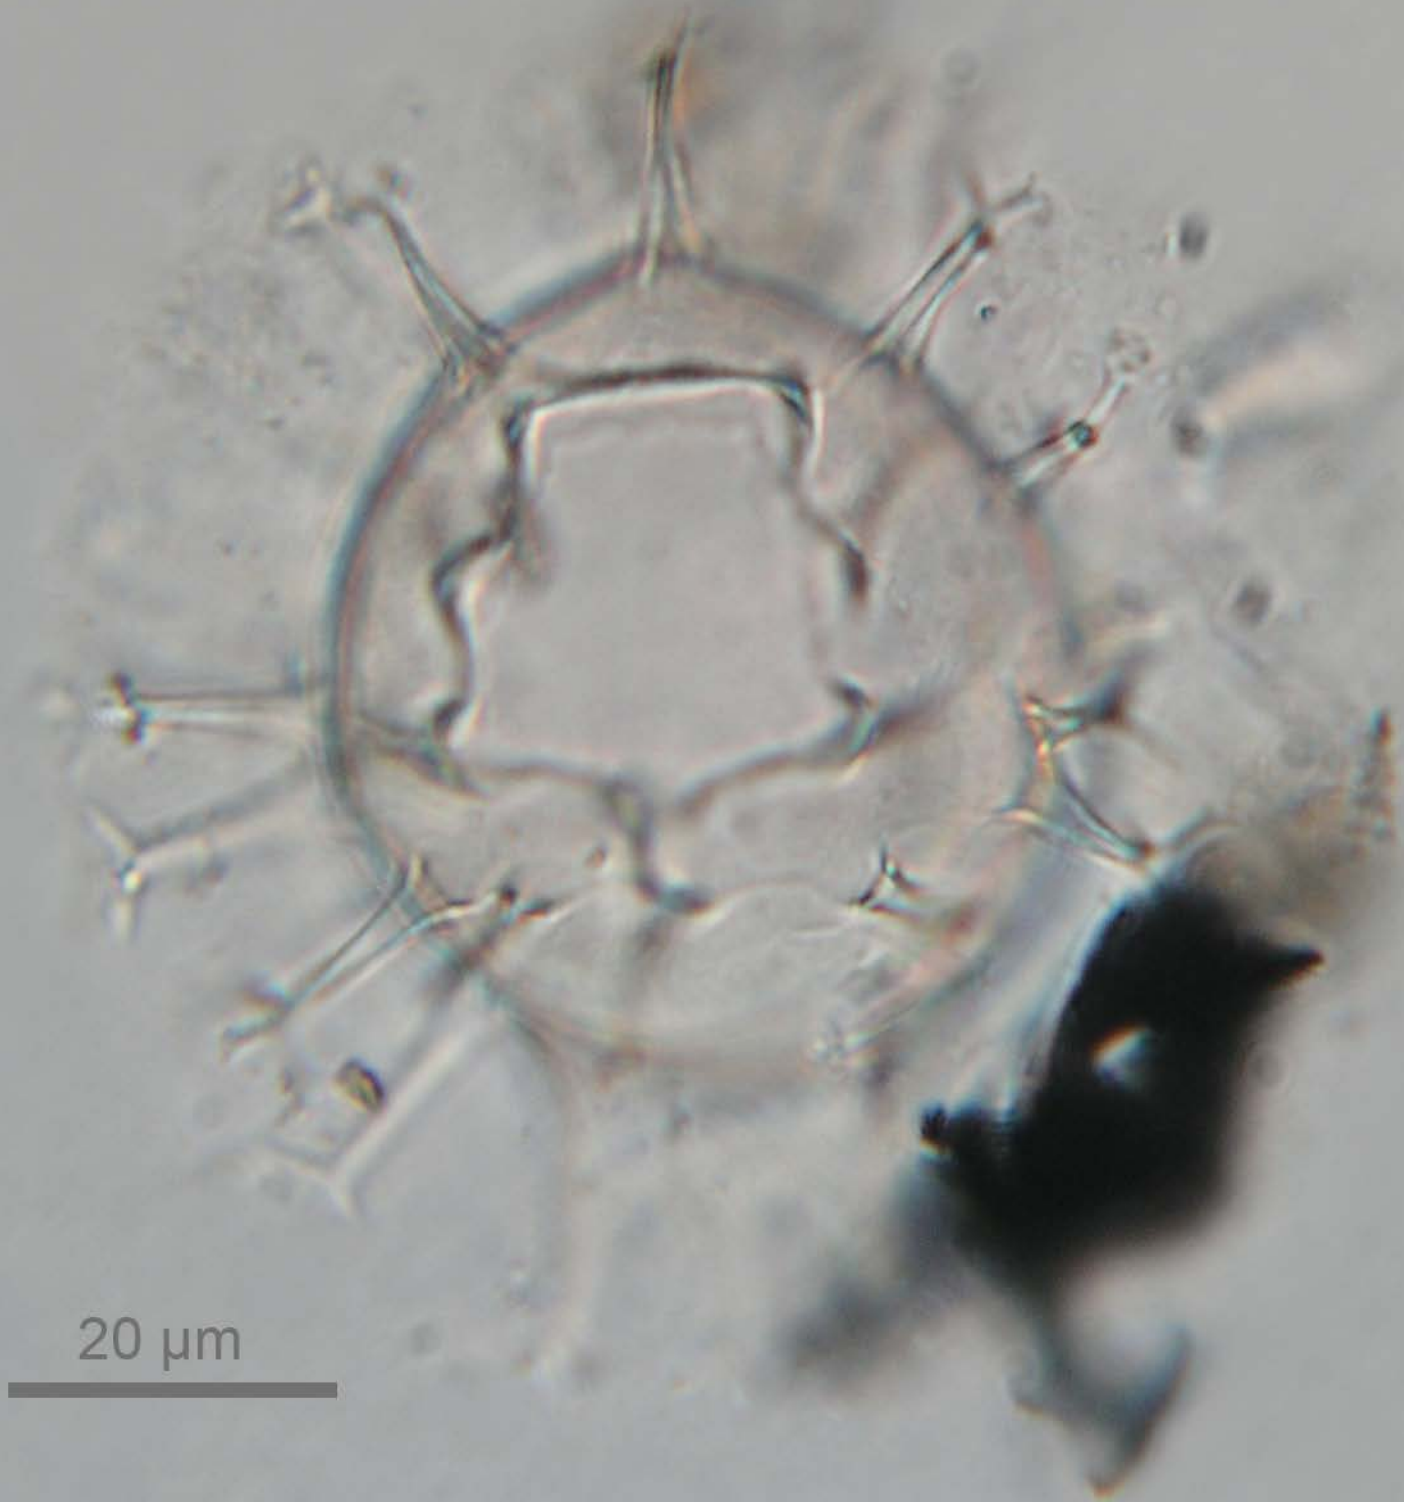

20  $\mu\text{m}$

*Spiniferites mirabilis* (Rossignol 1964) Sarjeant 1970  
characteristical specimen

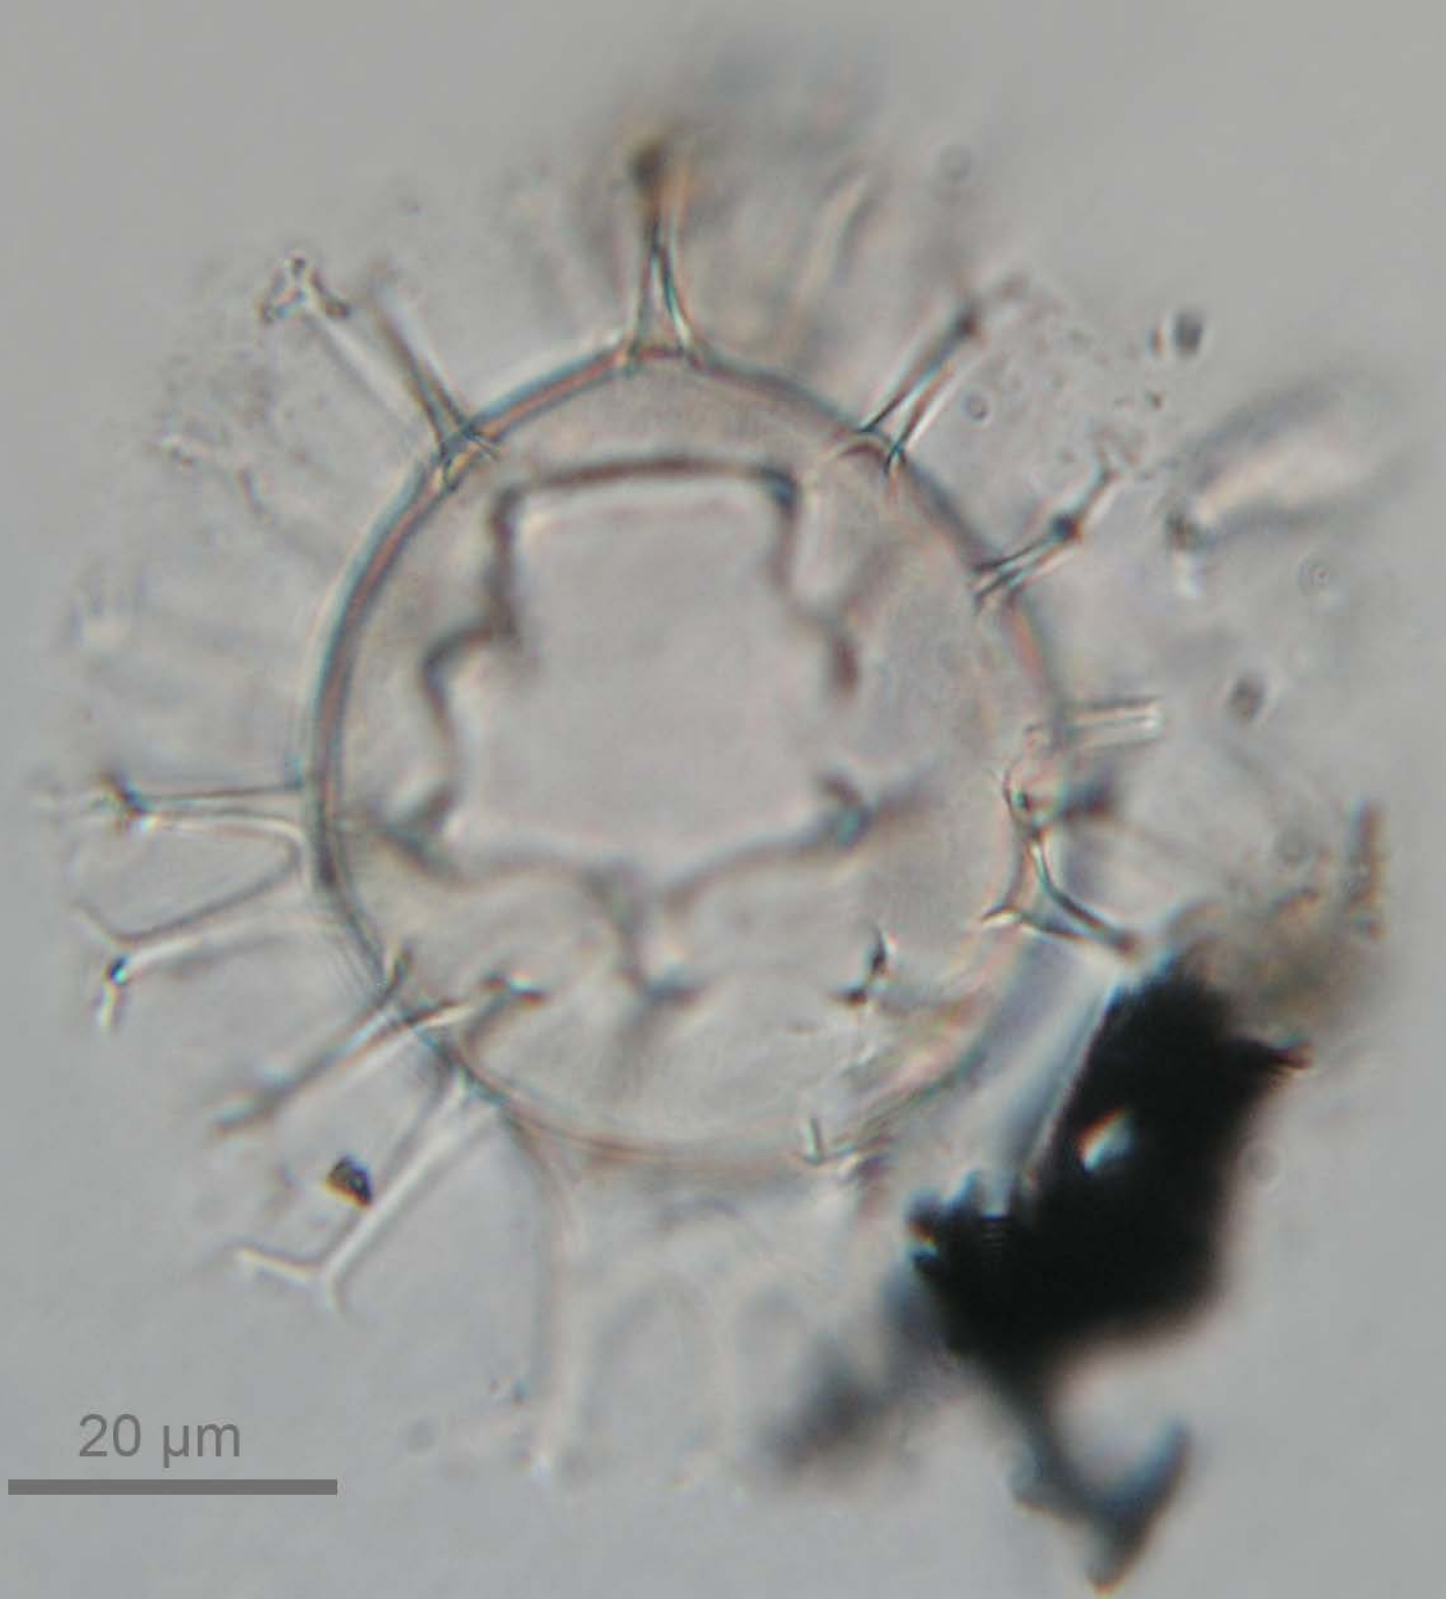

20  $\mu\text{m}$

*Spiniferites mirabilis* (Rossignol 1964) Sarjeant 1970  
characteristical specimen

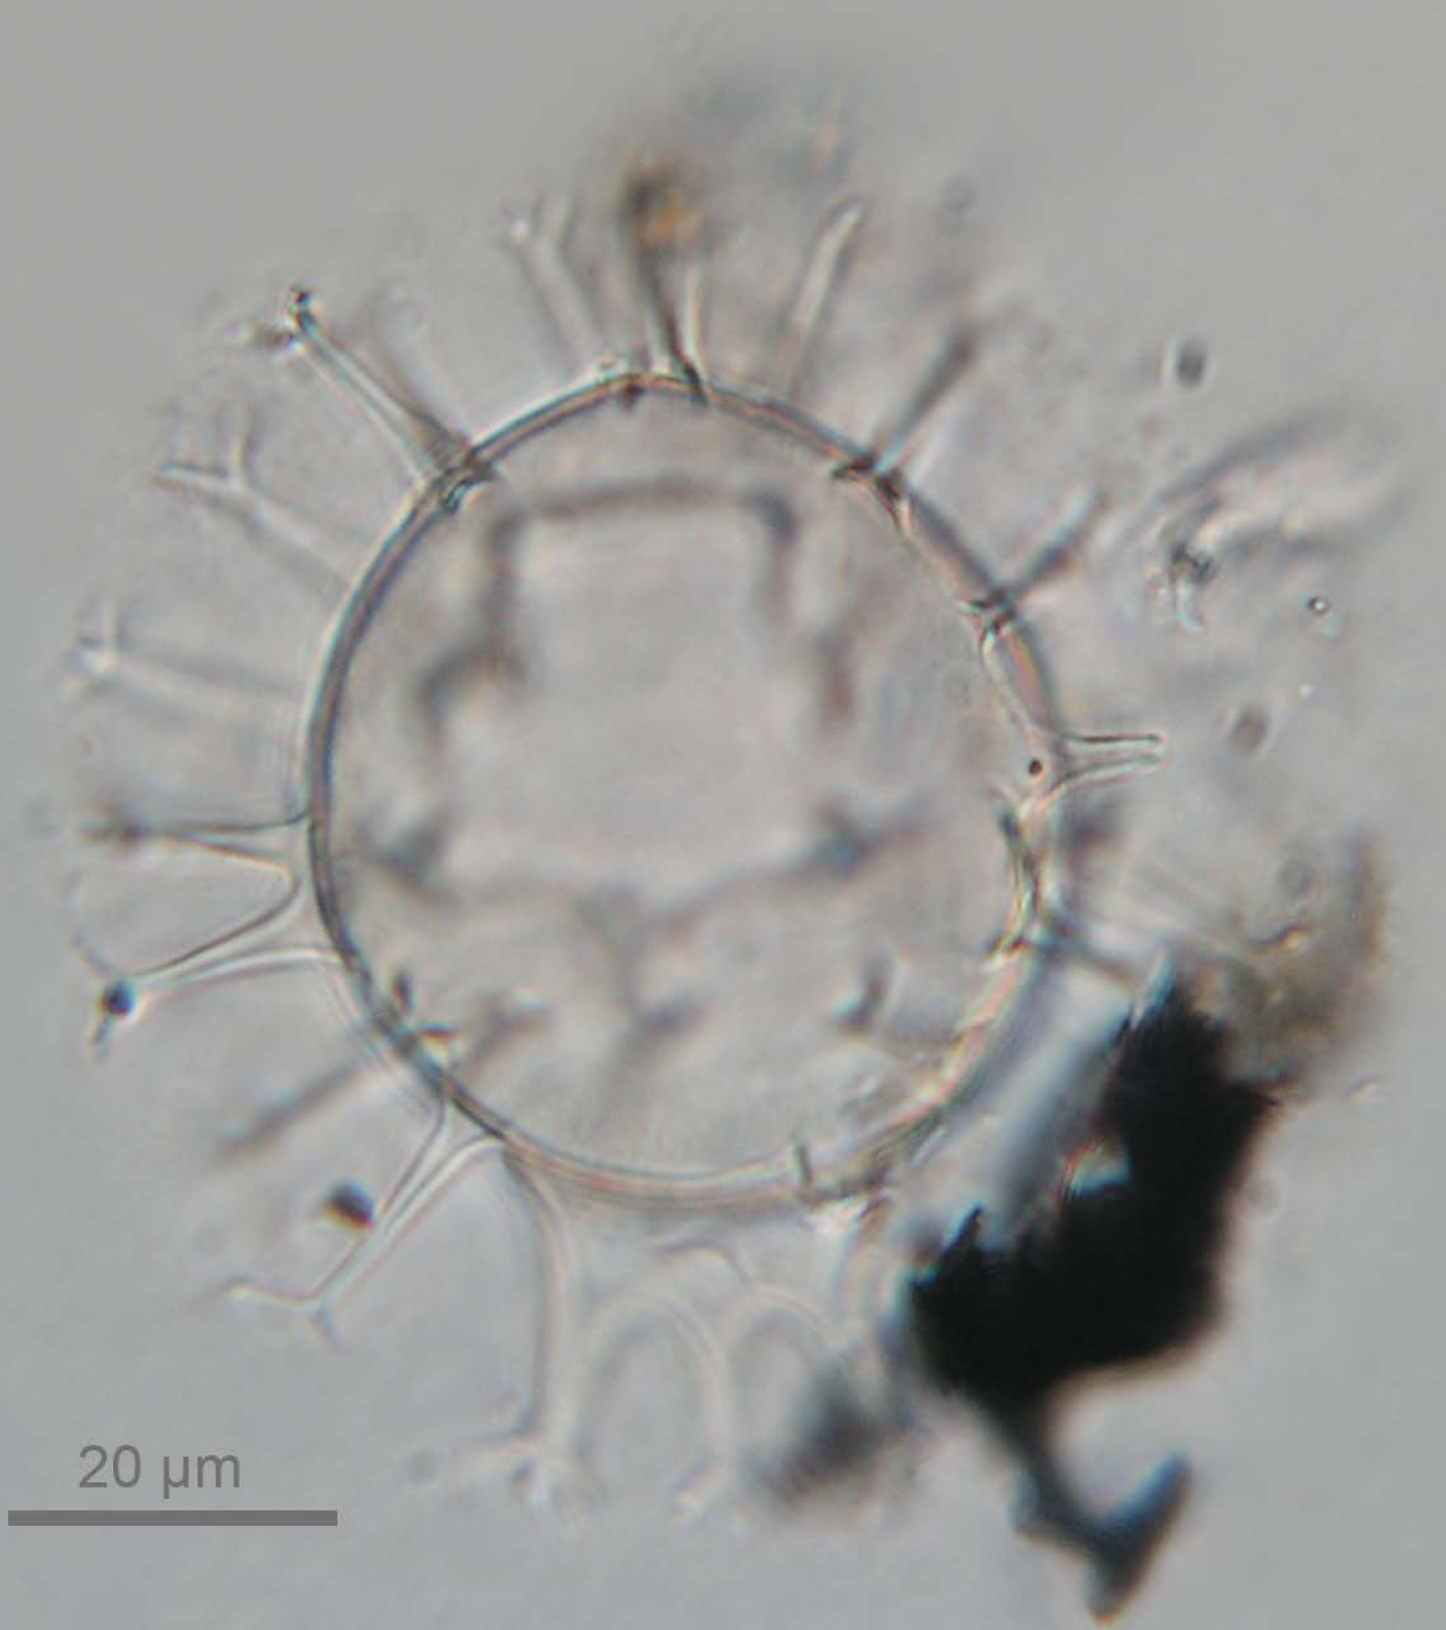

20 μm

*Spiniferites mirabilis* (Rossignol 1964) Sarjeant 1970  
characteristical specimen



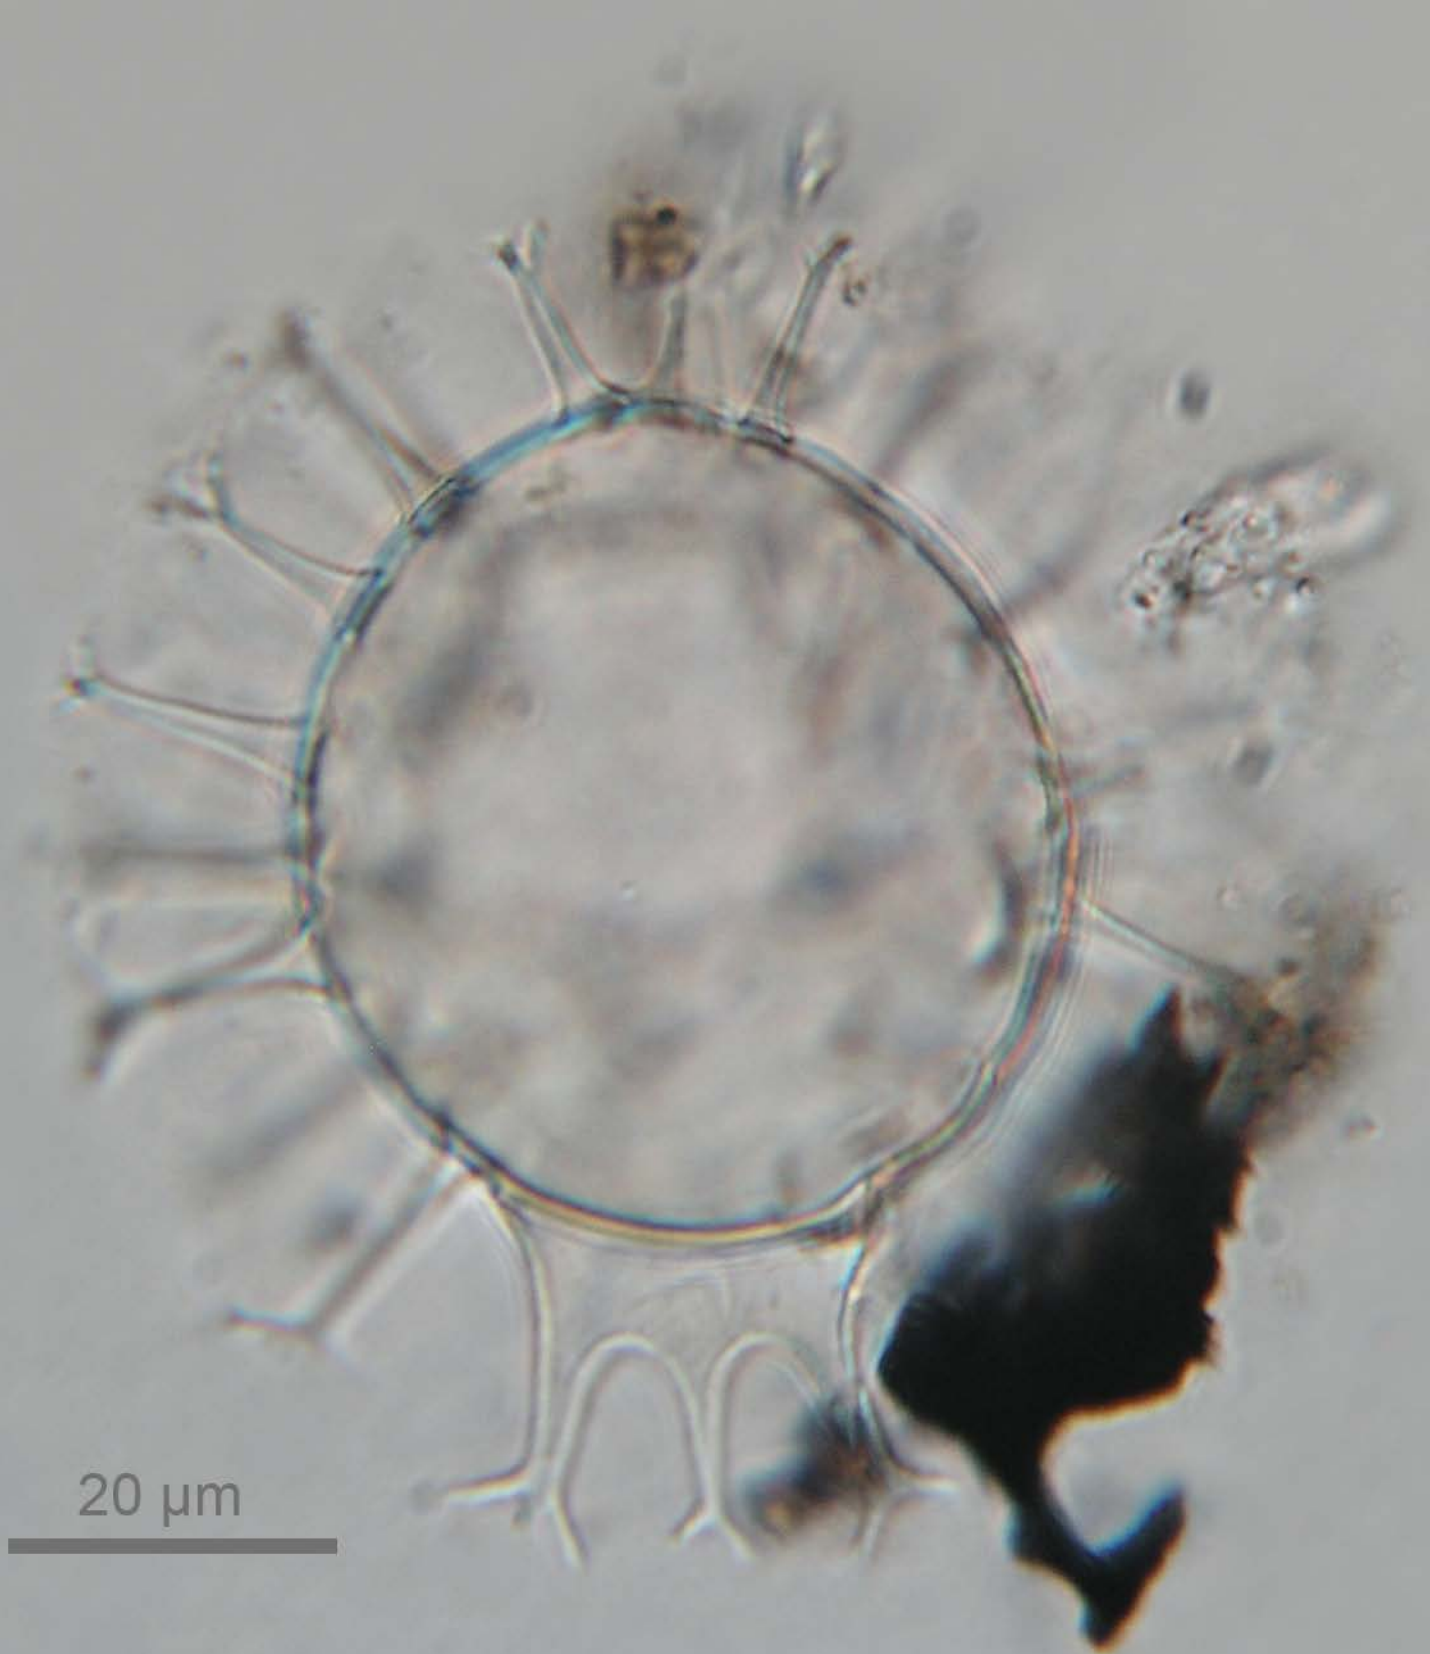

*Spiniferites mirabilis* (Rossignol 1964) Sarjeant 1970  
characteristical specimen



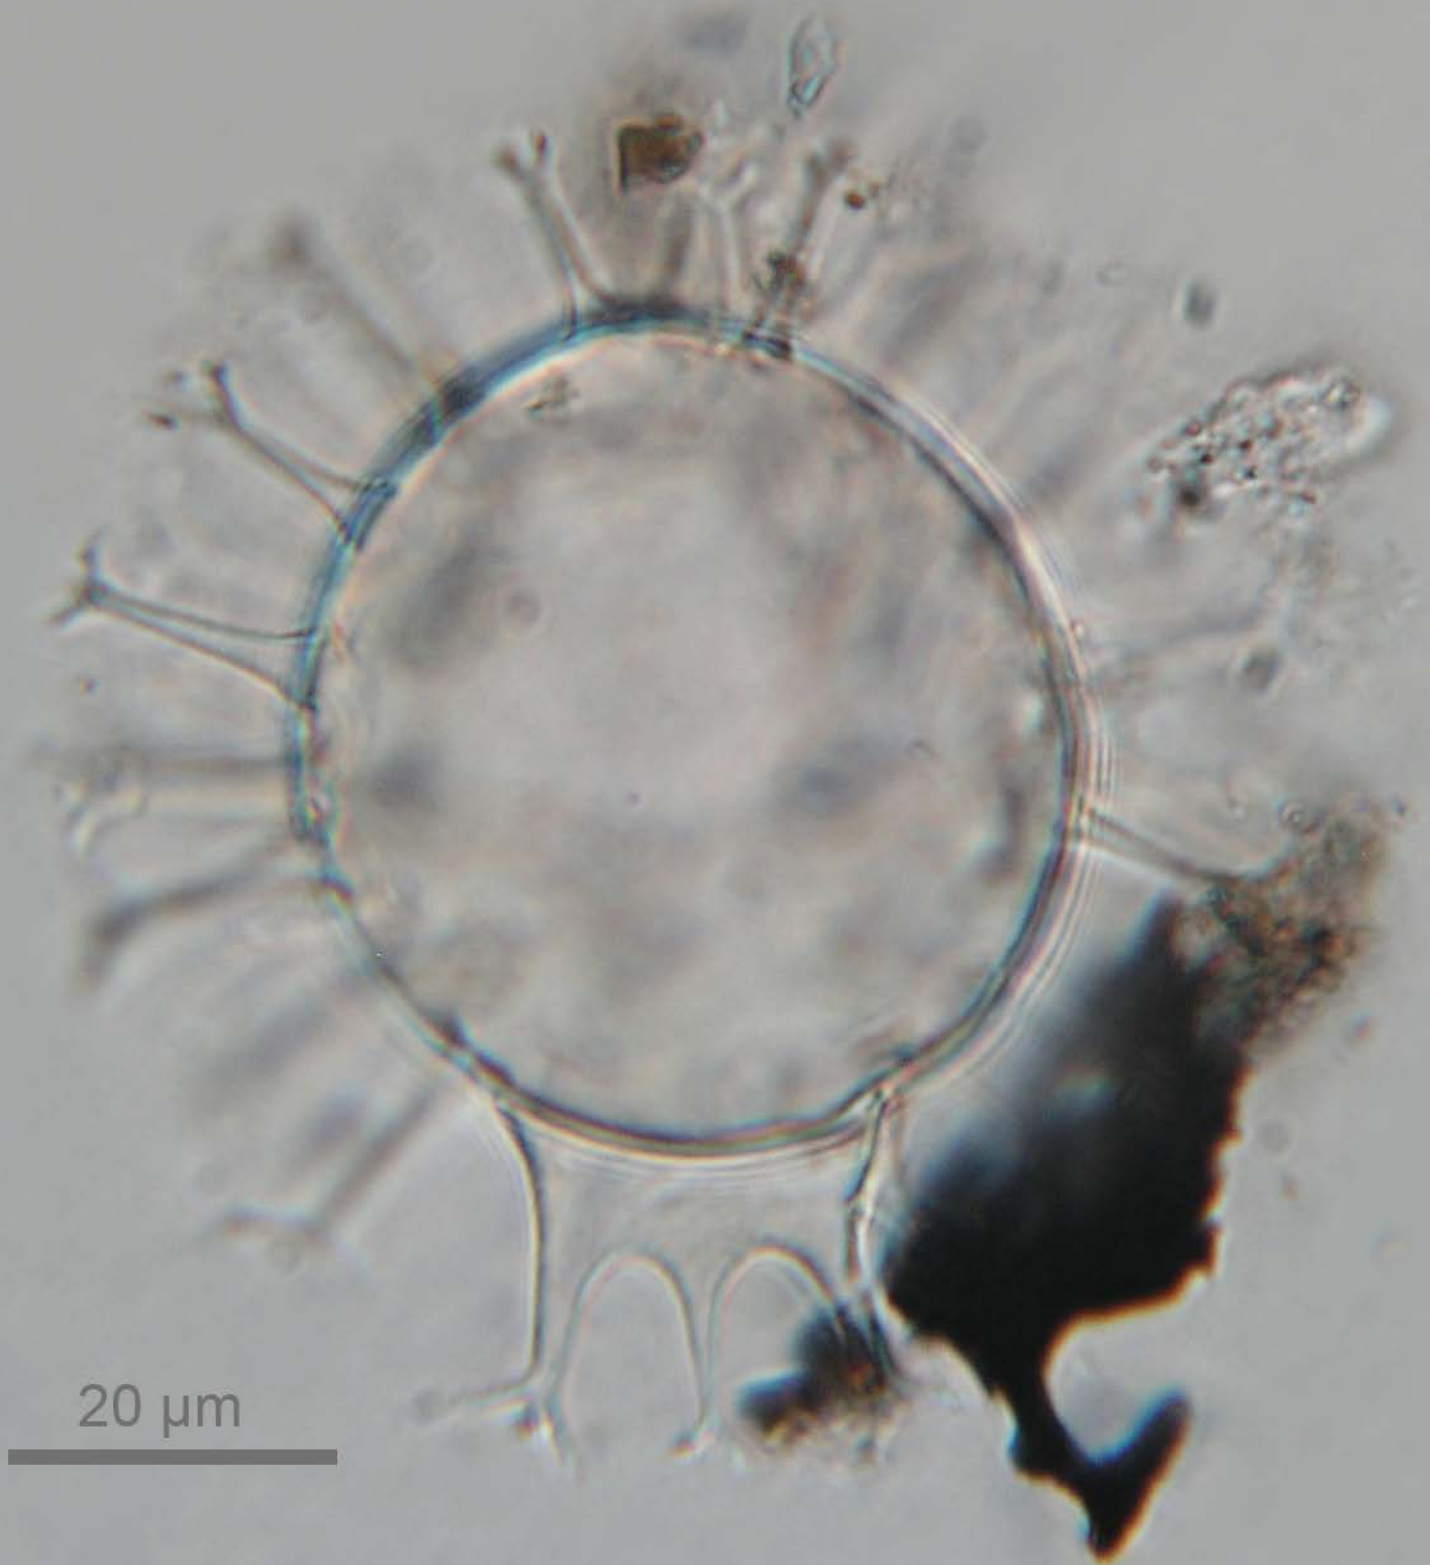

*Spiniferites mirabilis* (Rossignol 1964) Sarjeant 1970  
characteristical specimen

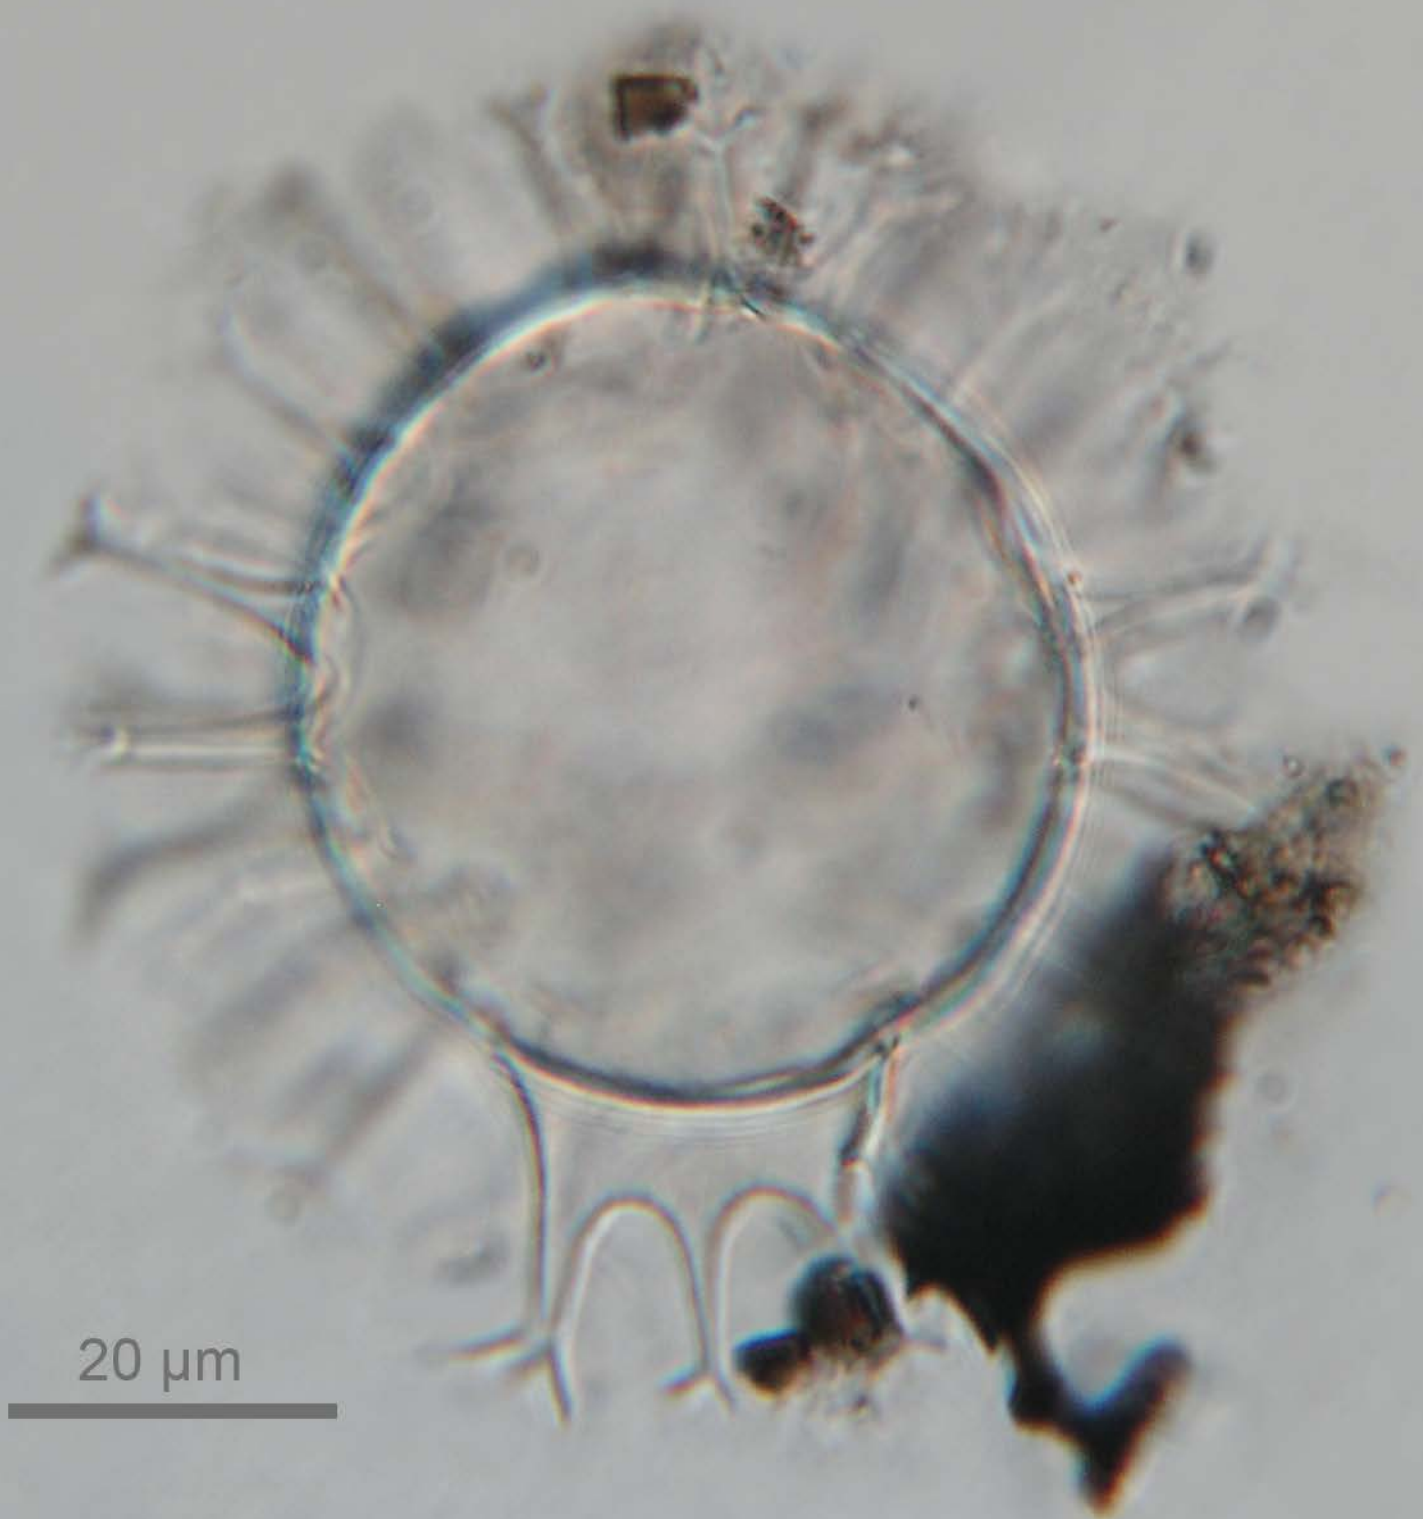

*Spiniferites mirabilis* (Rossignol 1964) Sarjeant 1970  
characteristical specimen

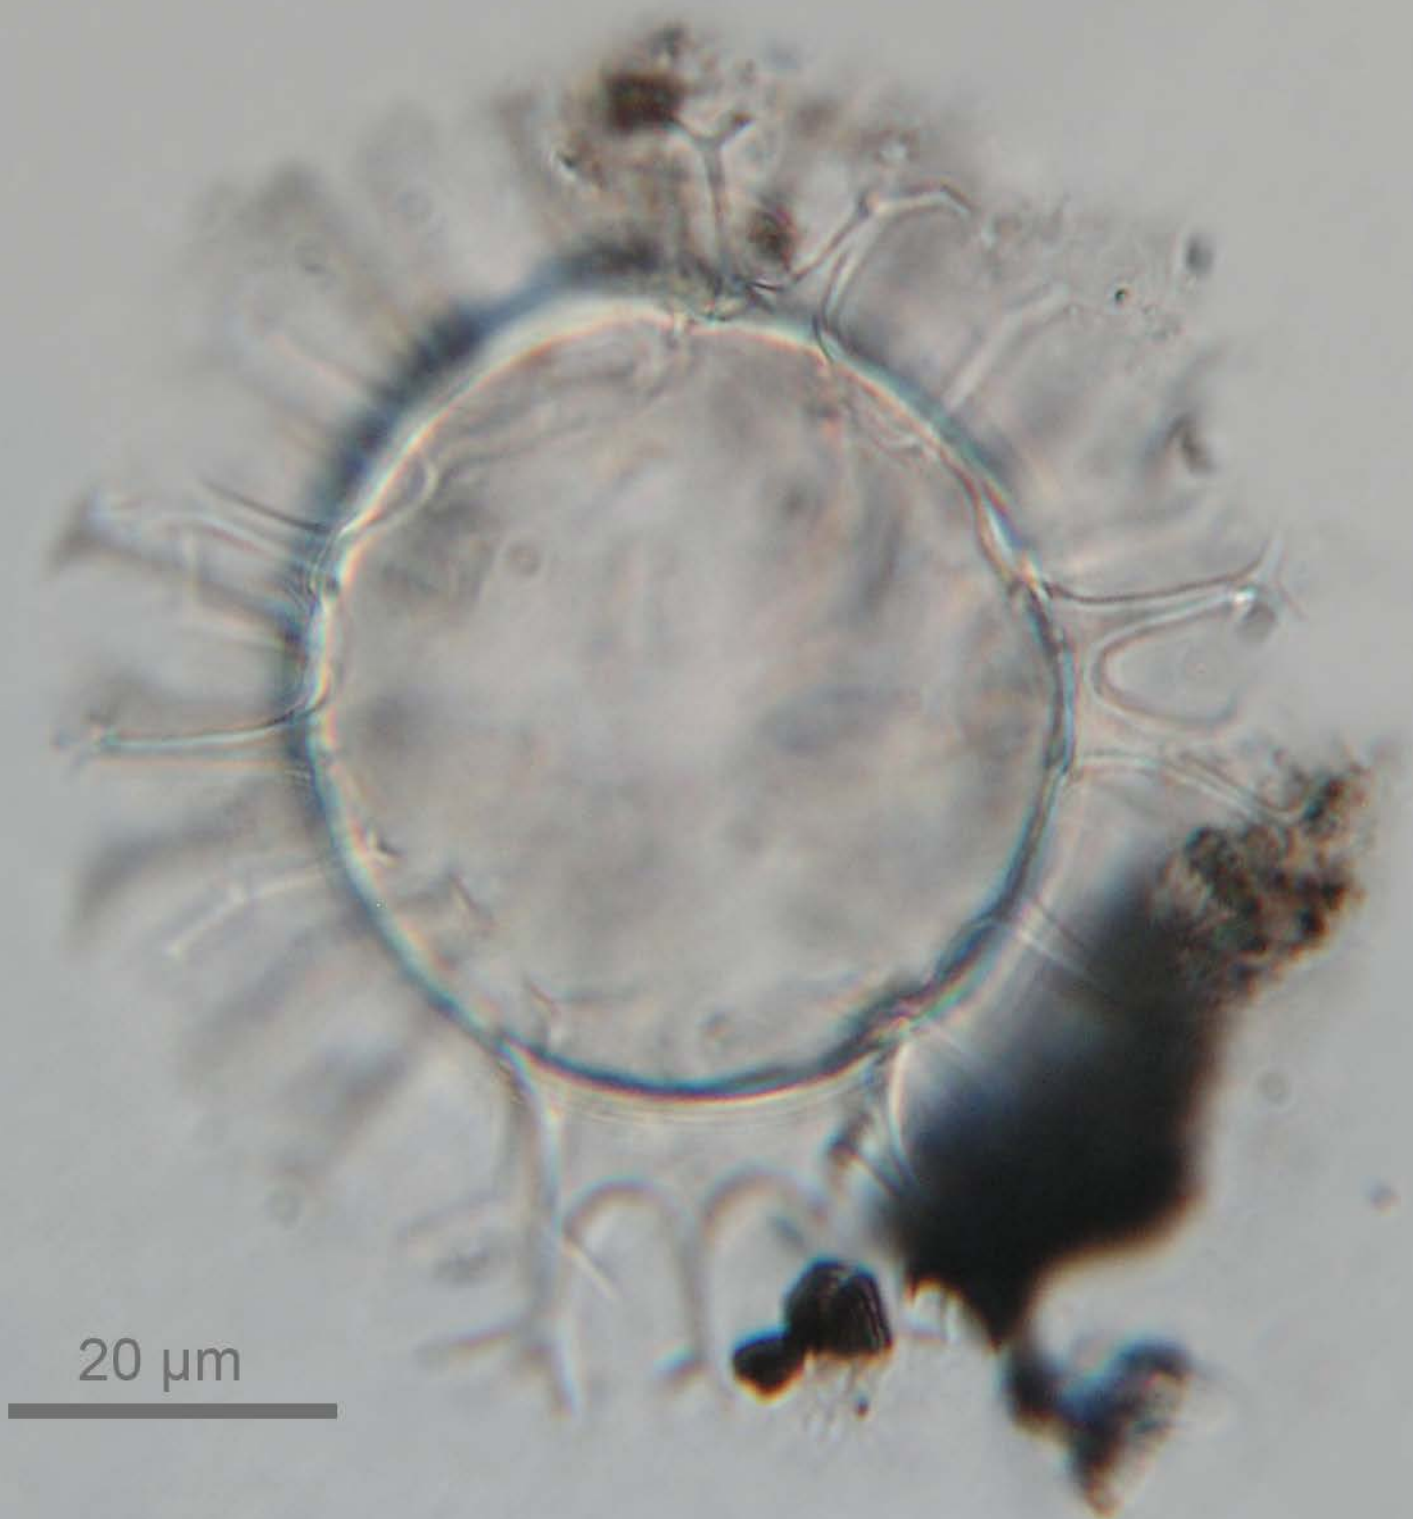

20  $\mu\text{m}$

*Spiniferites mirabilis* (Rossignol 1964) Sarjeant 1970  
characteristical specimen



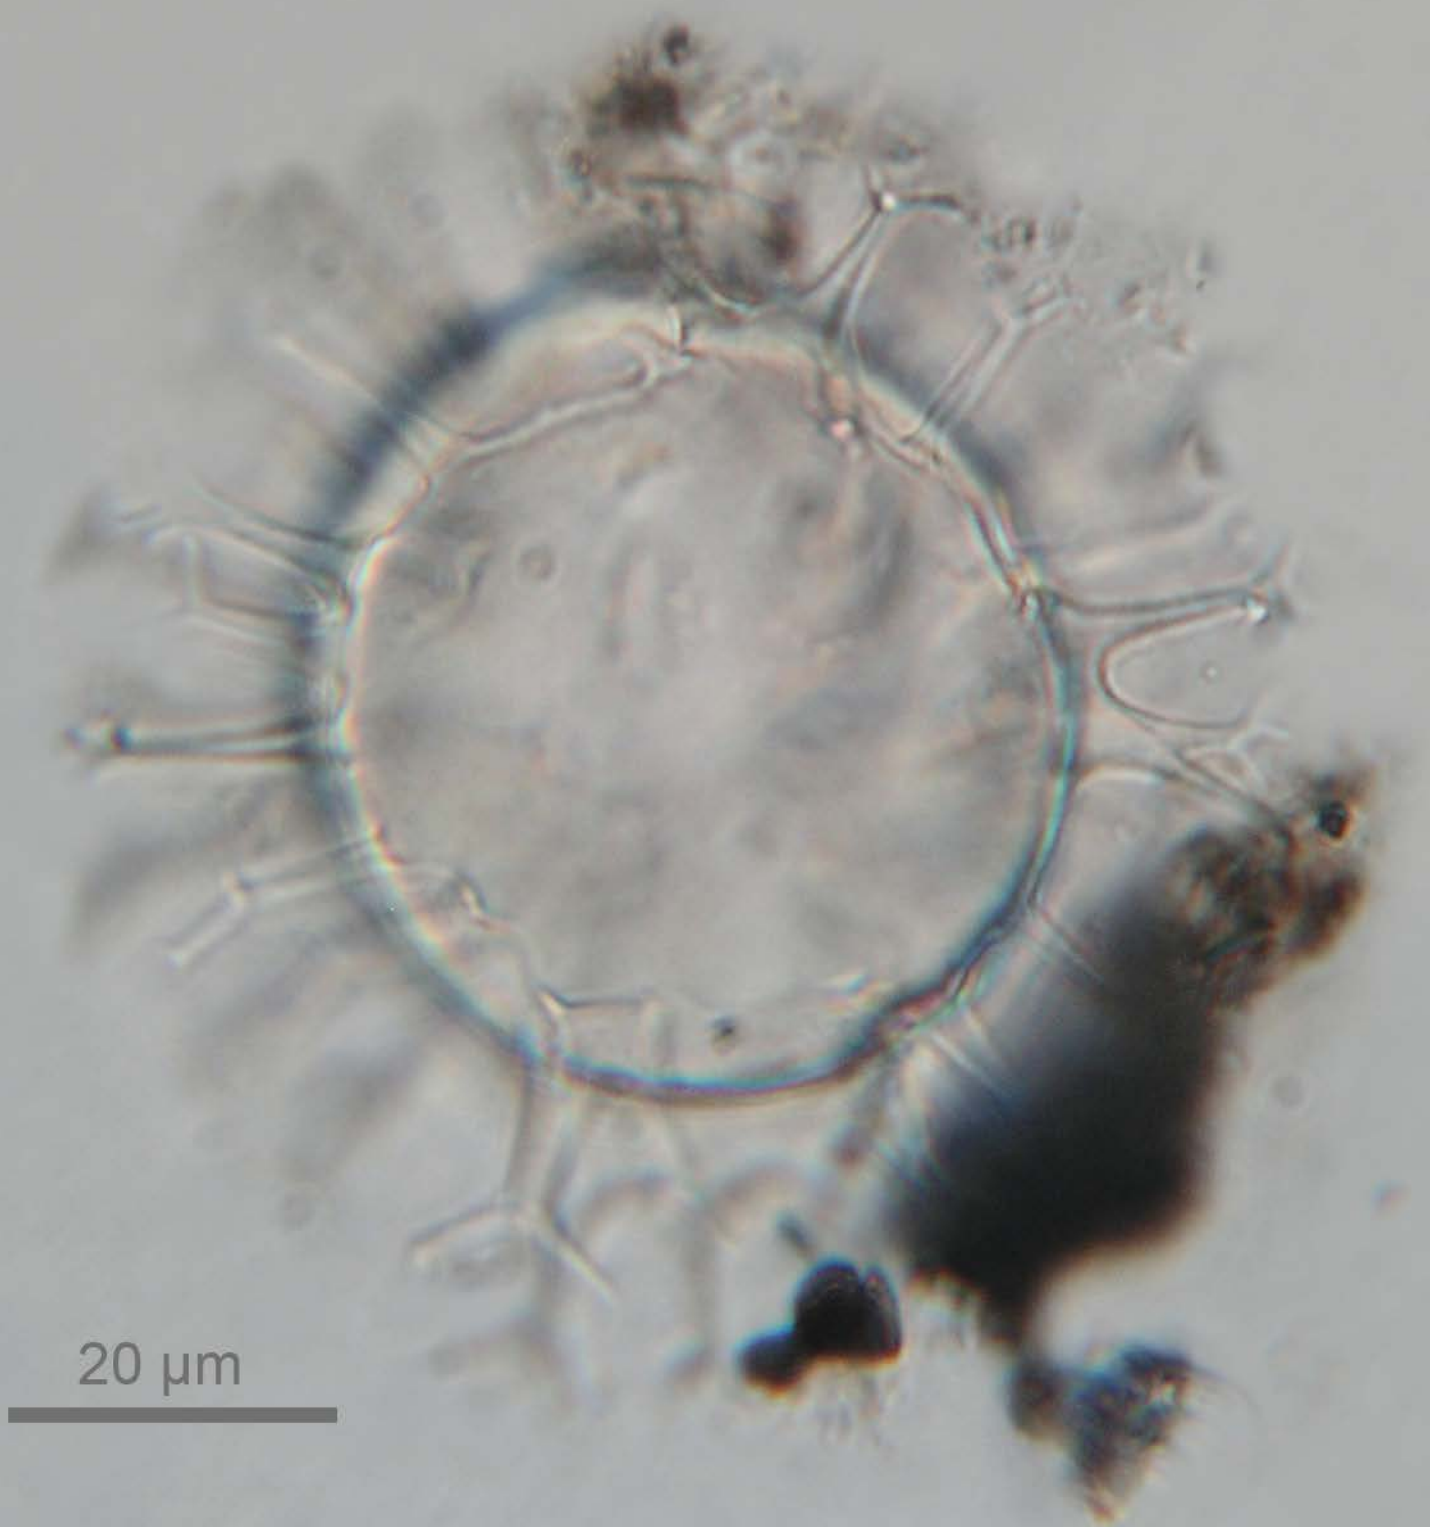

*Spiniferites mirabilis* (Rossignol 1964) Sarjeant 1970  
characteristical specimen



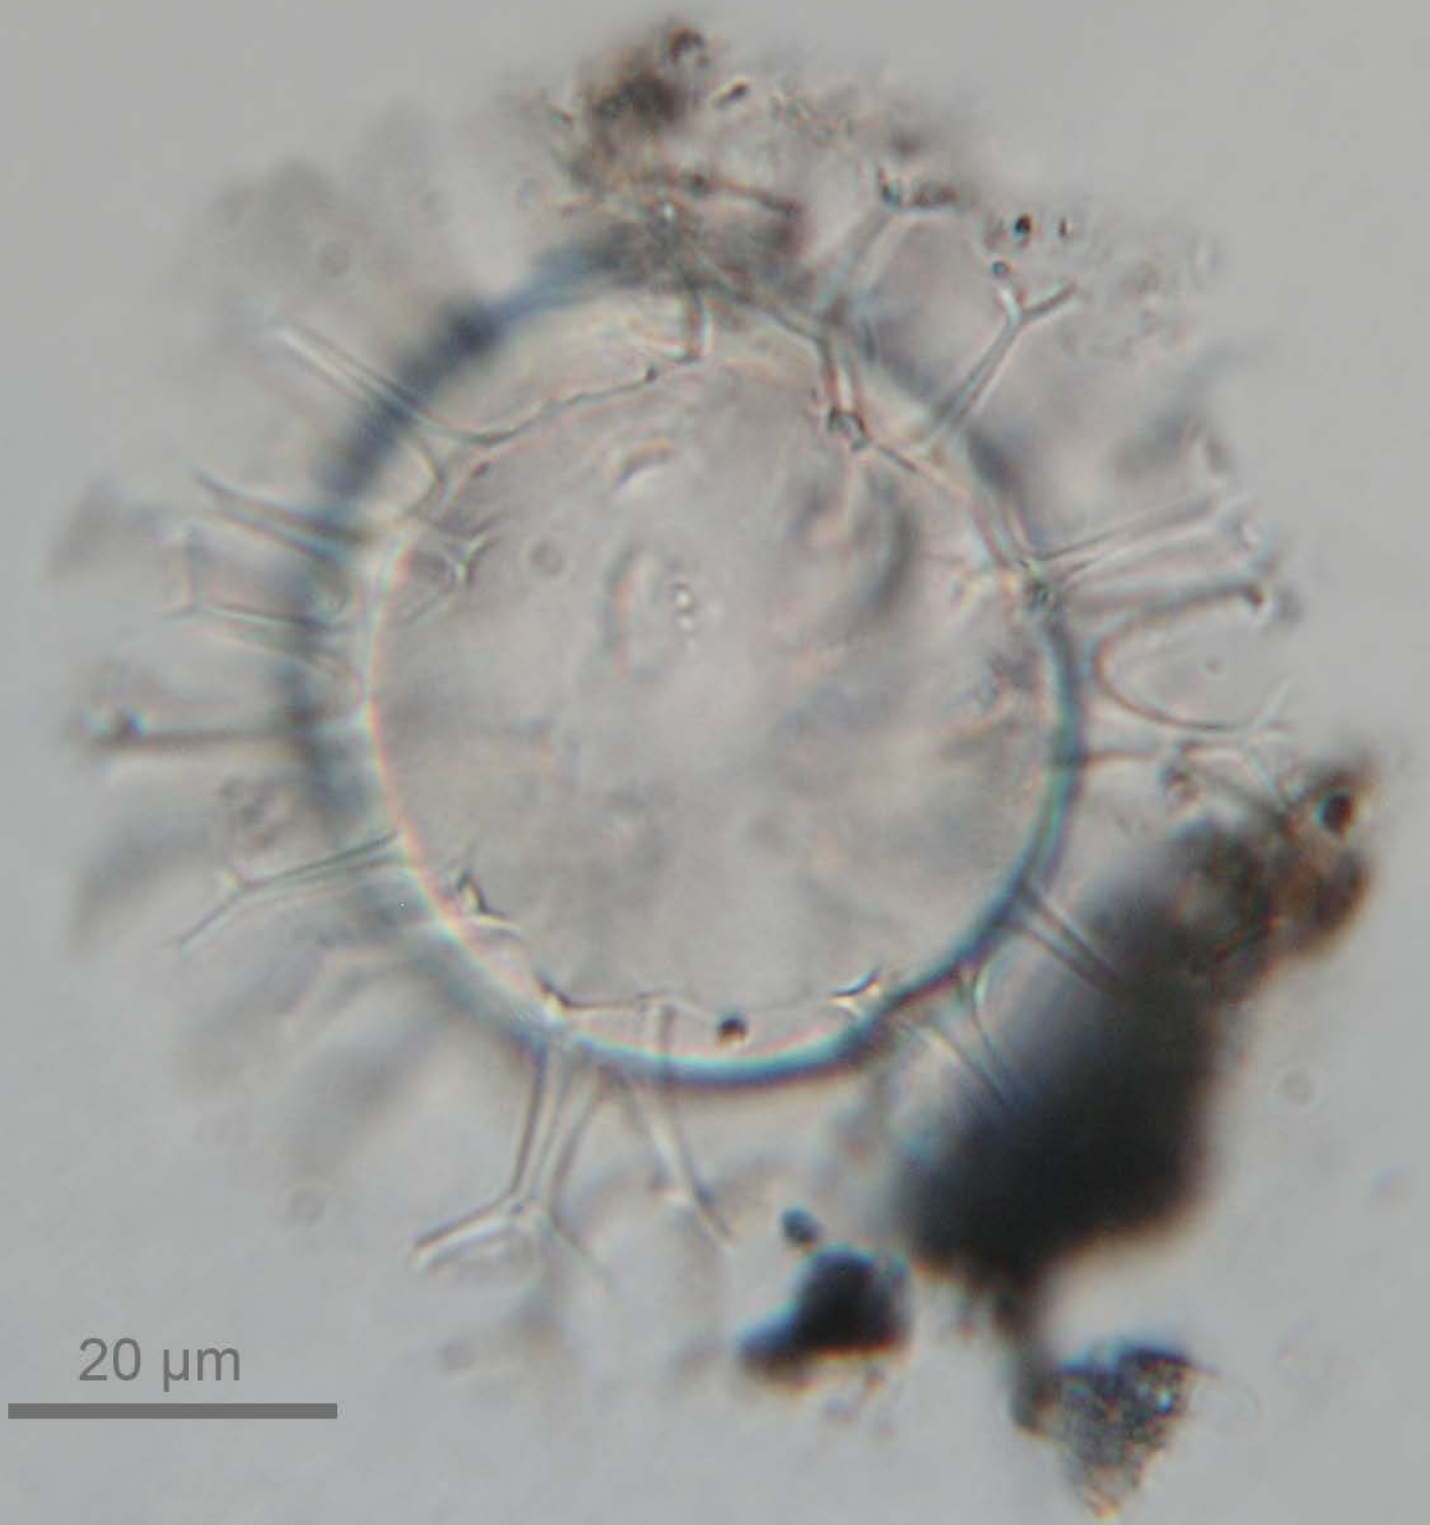

20  $\mu\text{m}$

*Spiniferites mirabilis* (Rossignol 1964) Sarjeant 1970  
characteristical specimen

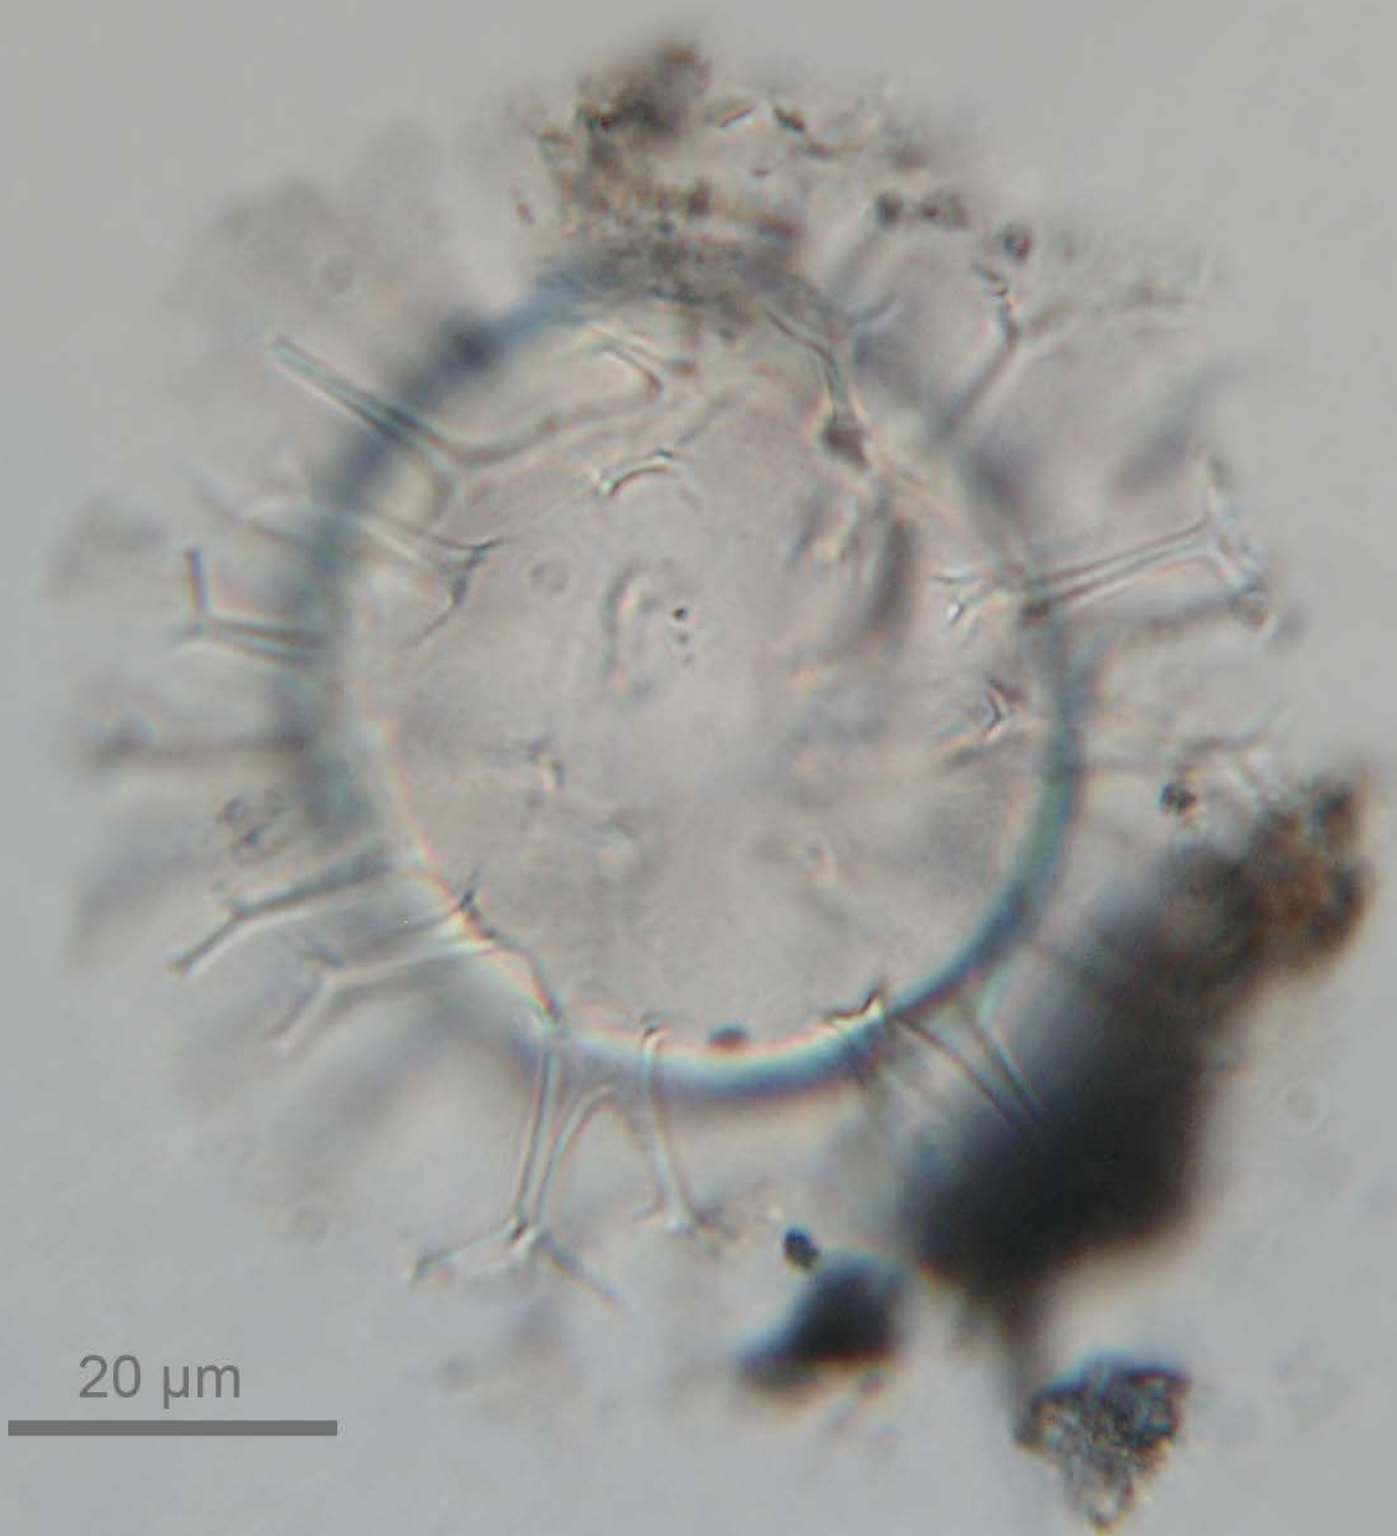

20 μm

*Spiniferites mirabilis* (Rossignol 1964) Sarjeant 1970  
characteristical specimen

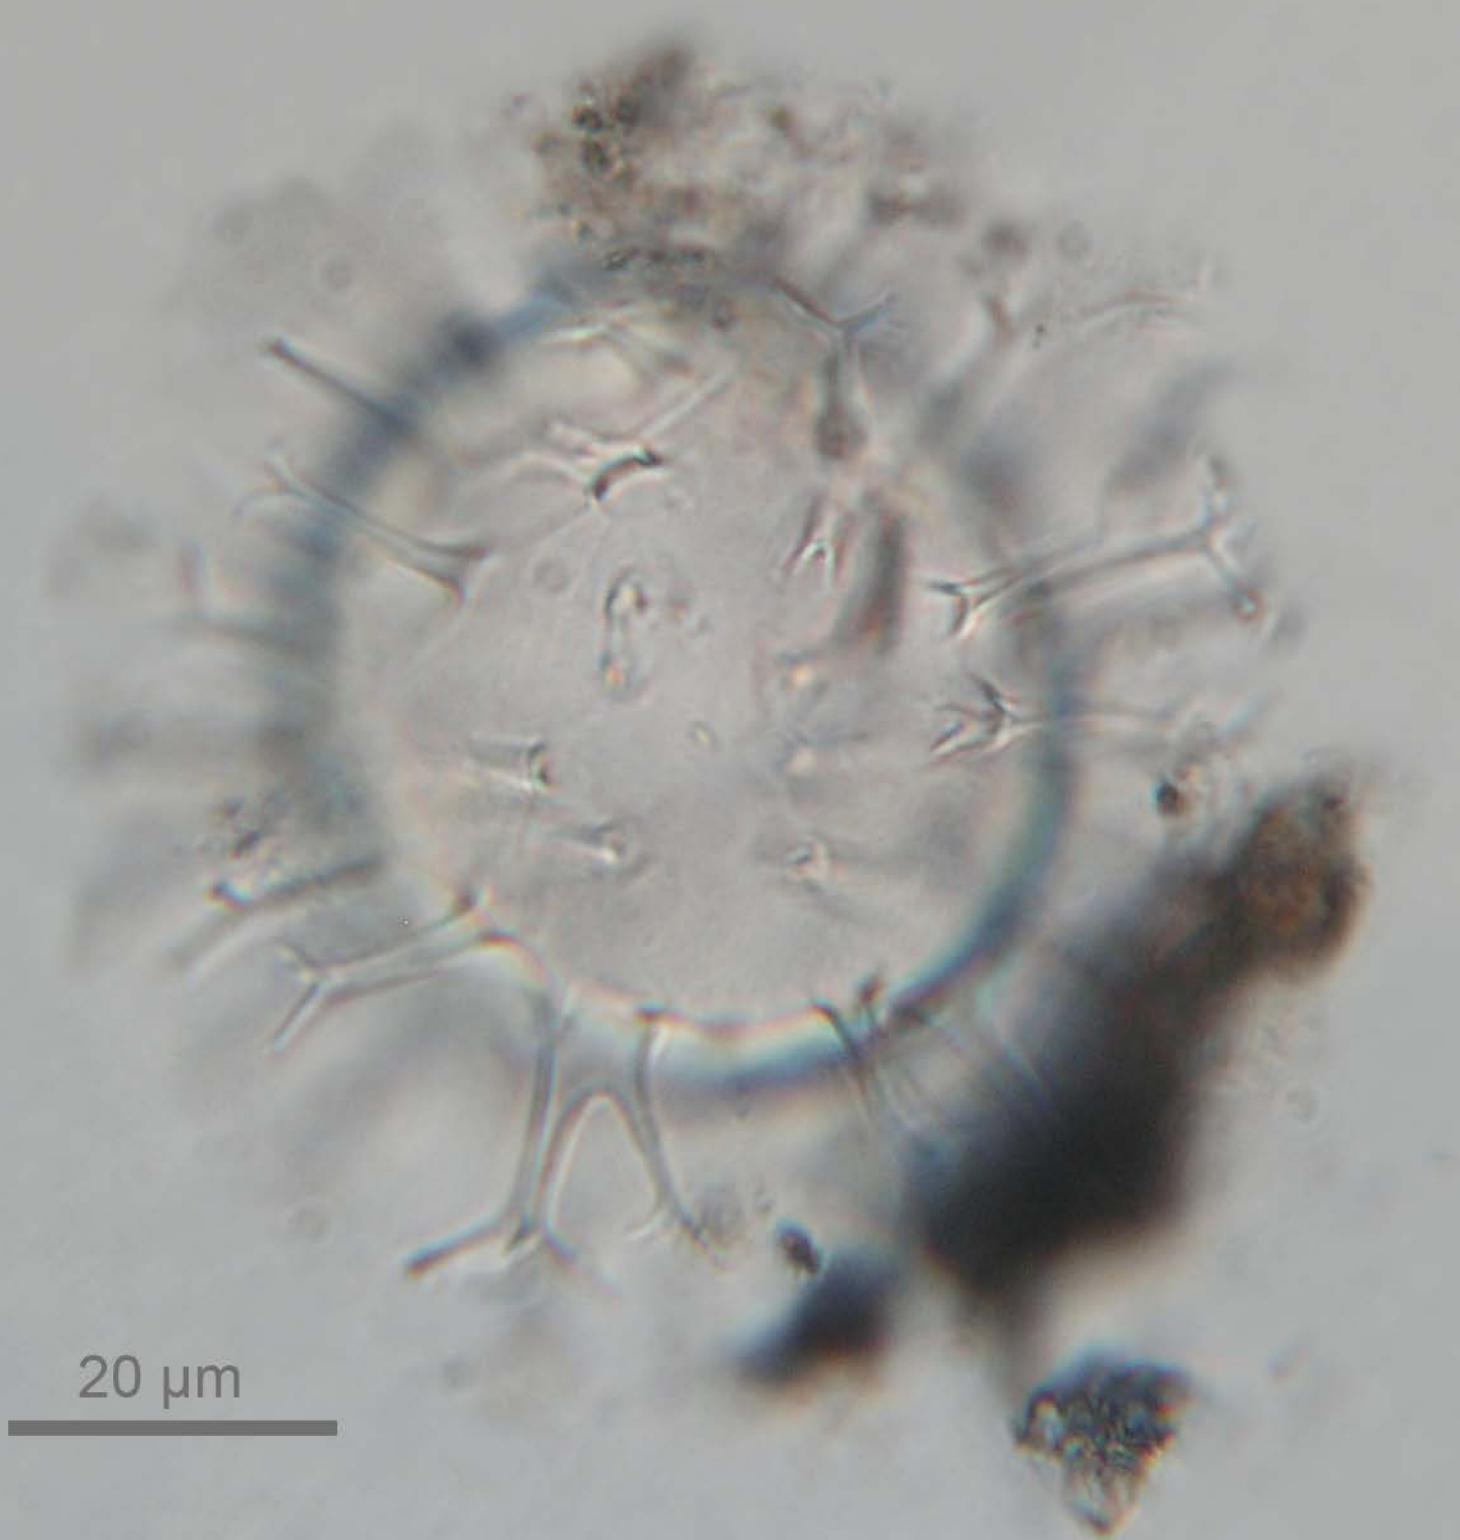

20  $\mu\text{m}$

*Spiniferites mirabilis* (Rossignol 1964) Sarjeant 1970  
characteristical specimen



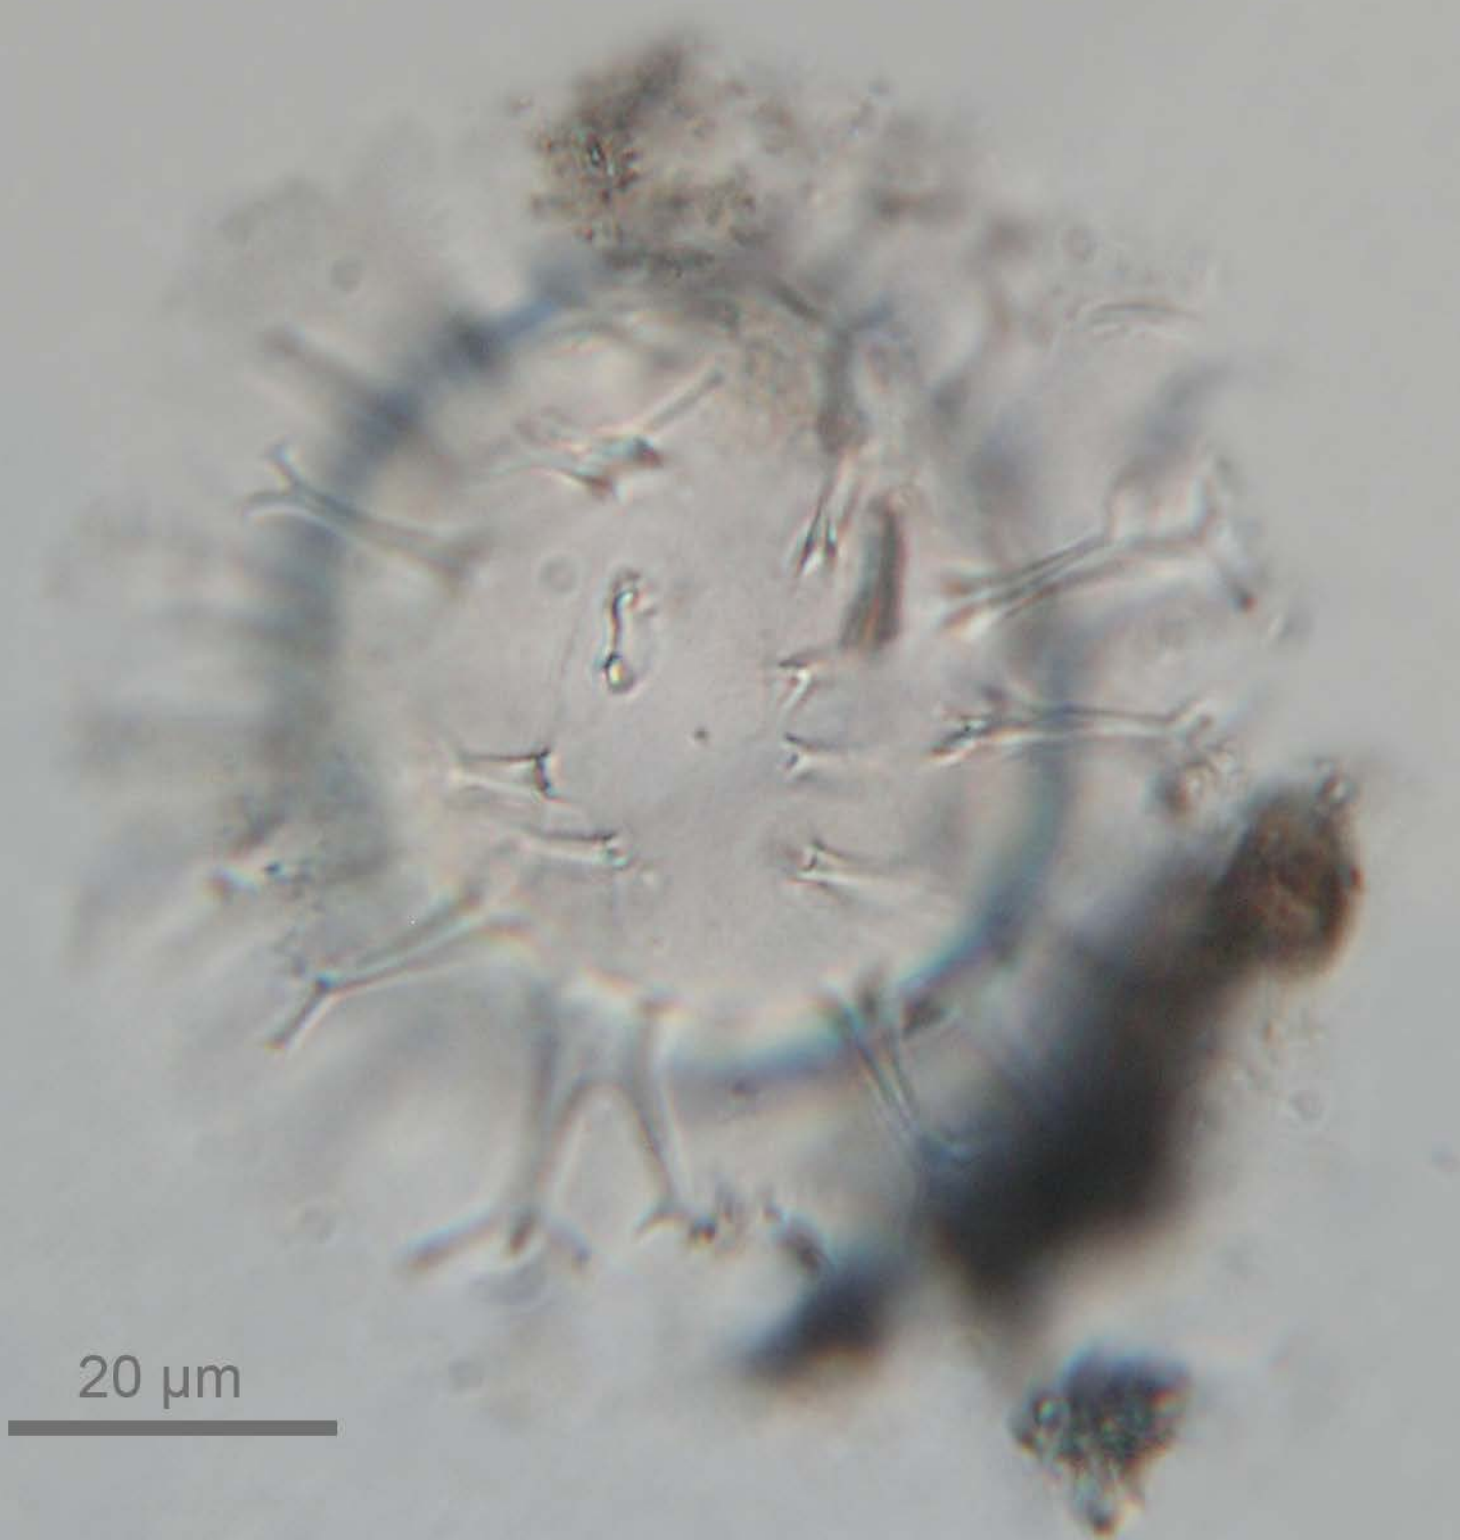

*Spiniferites mirabilis* (Rossignol 1964) Sarjeant 1970  
characteristical specimen



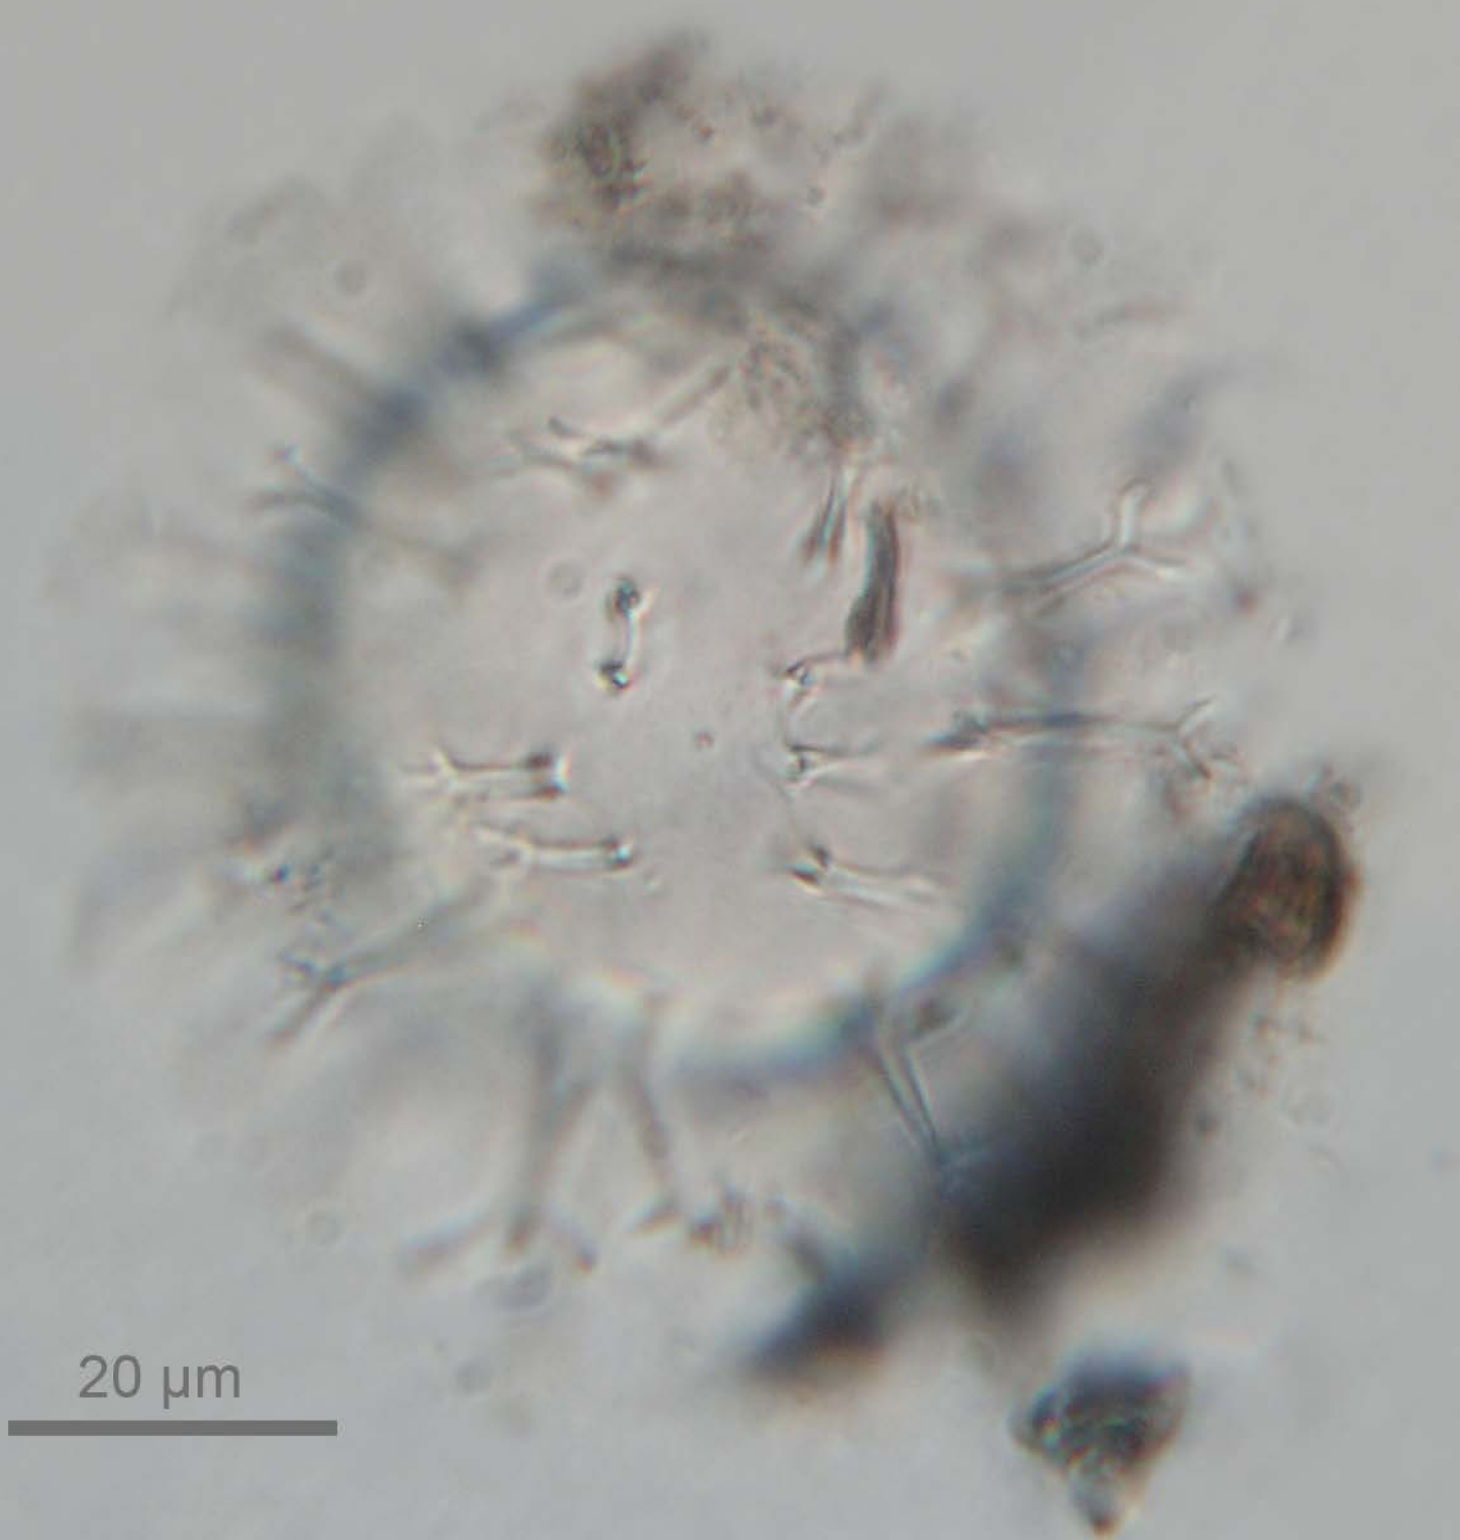

*Spiniferites mirabilis* (Rossignol 1964) Sarjeant 1970  
characteristical specimen

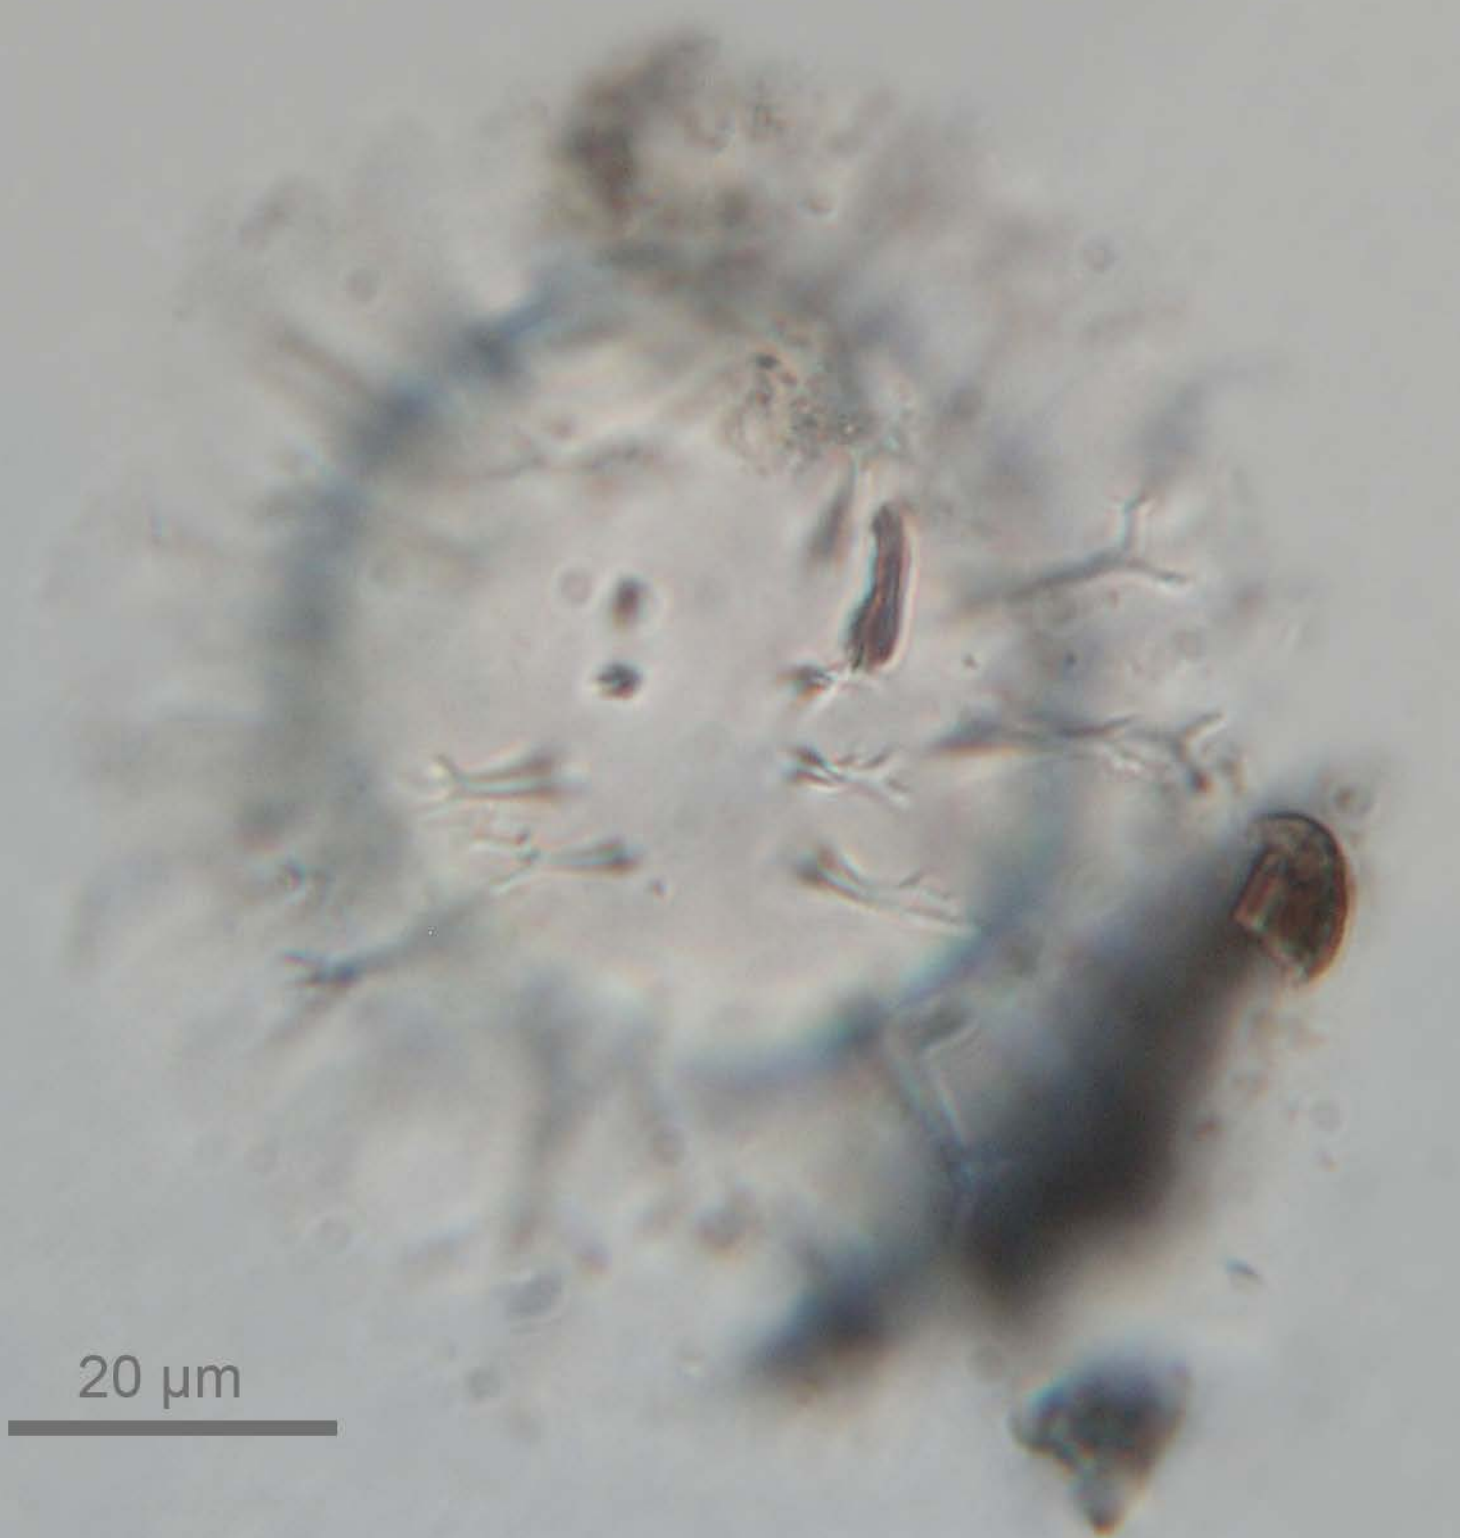

*Spiniferites mirabilis* (Rossignol 1964) Sarjeant 1970  
characteristical specimen

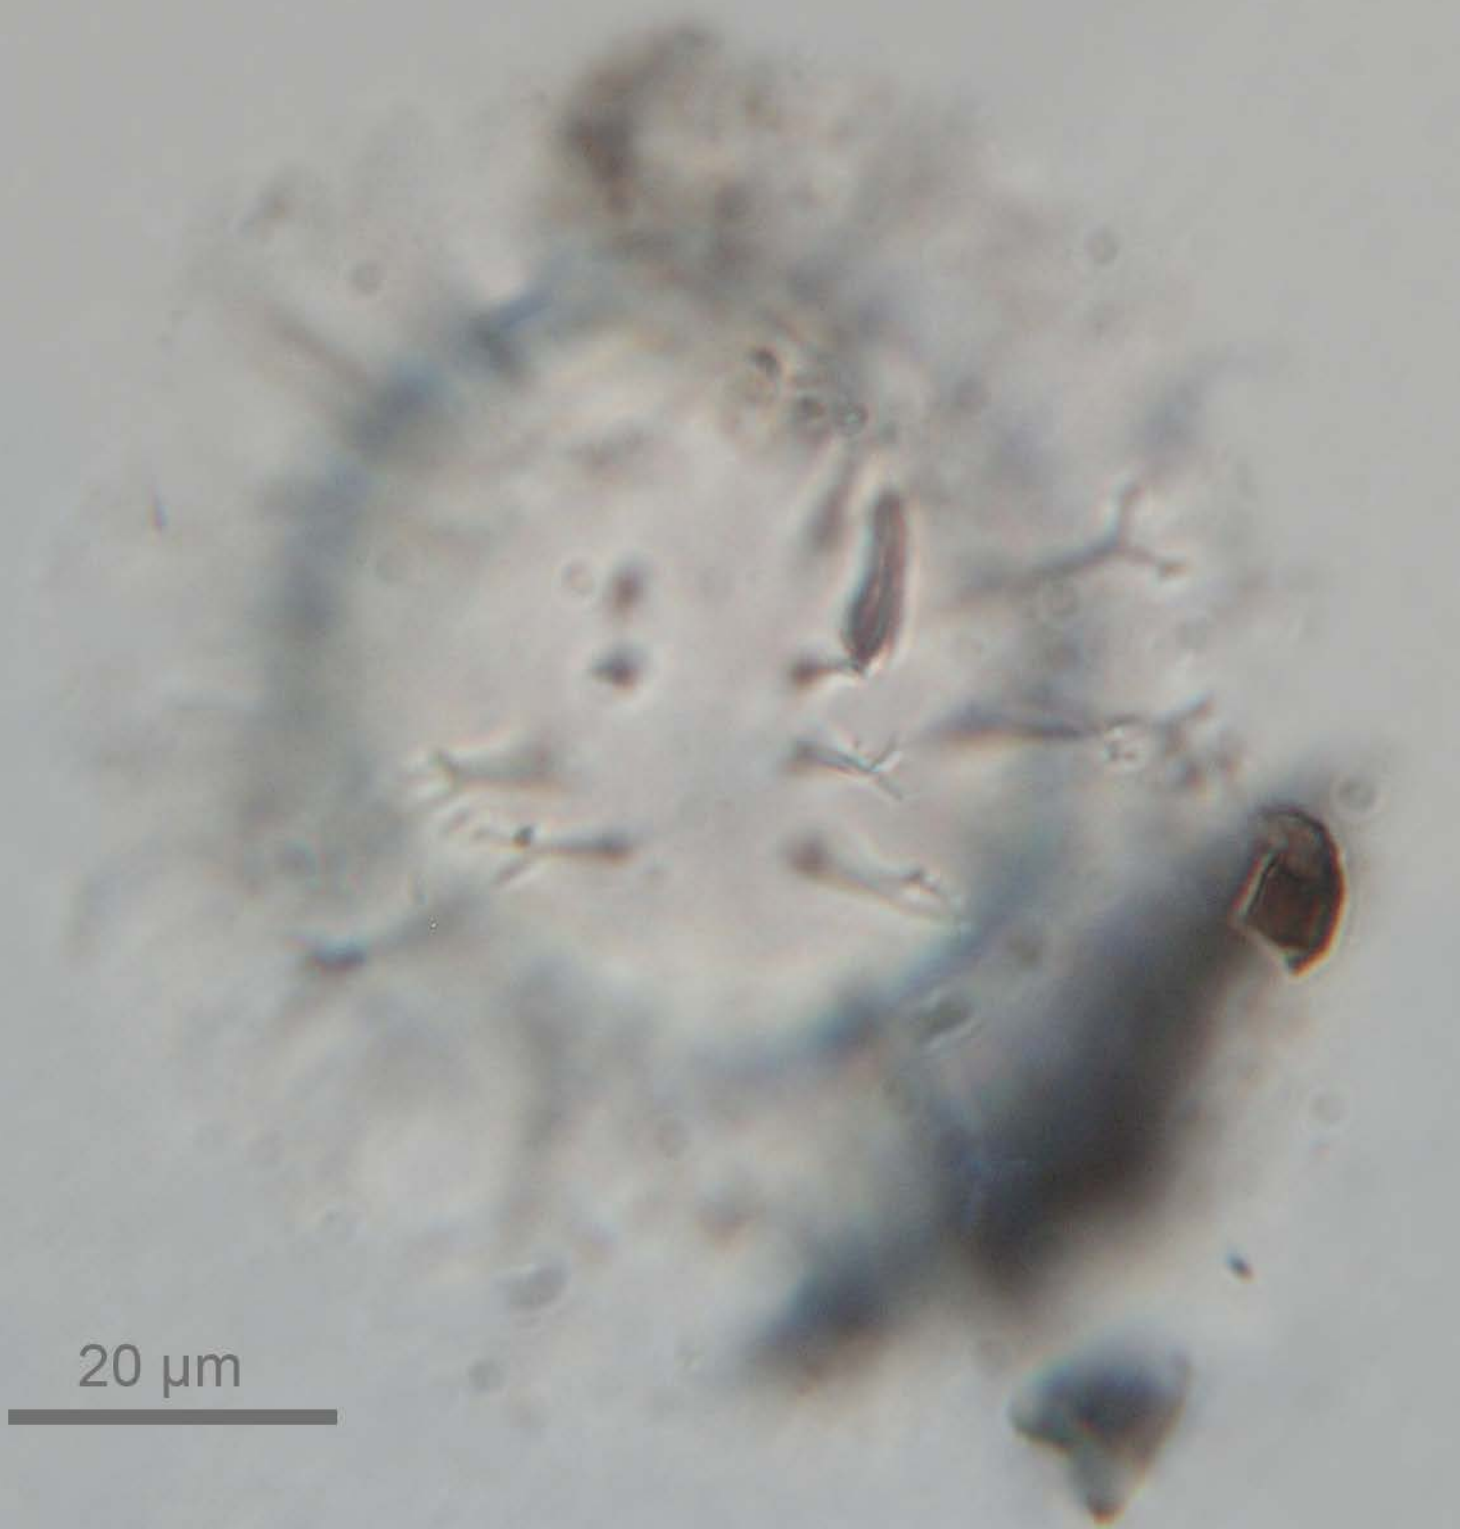

*Spiniferites mirabilis* (Rossignol 1964) Sarjeant 1970  
characteristical specimen

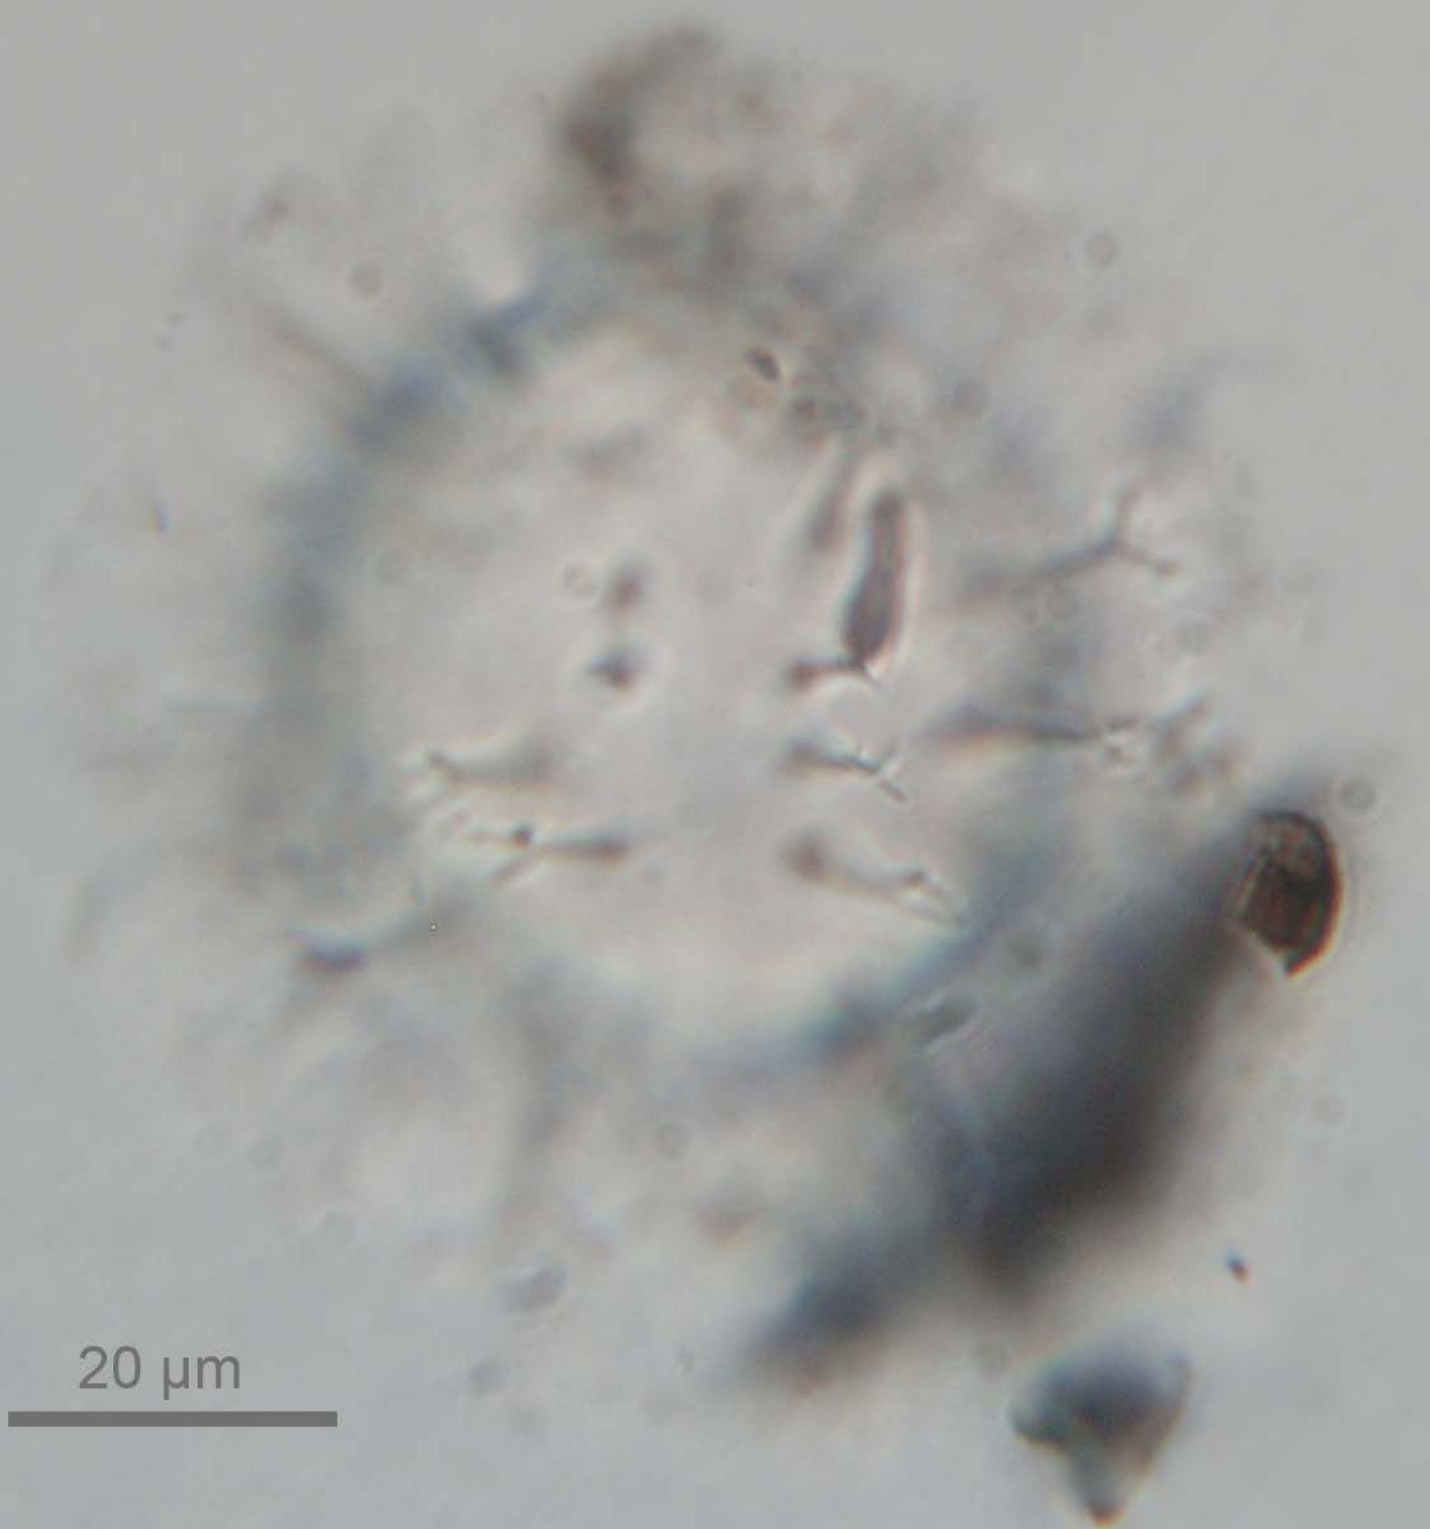

*Spiniferites mirabilis* (Rossignol 1964) Sarjeant 1970  
characteristical specimen
