# Supplementary material
Source: publisher figshare collection journal article supplement (https://tandf.figshare.com/articles/dataset/_/7466618)
Supplement: Supplementary file 16 [file 1]

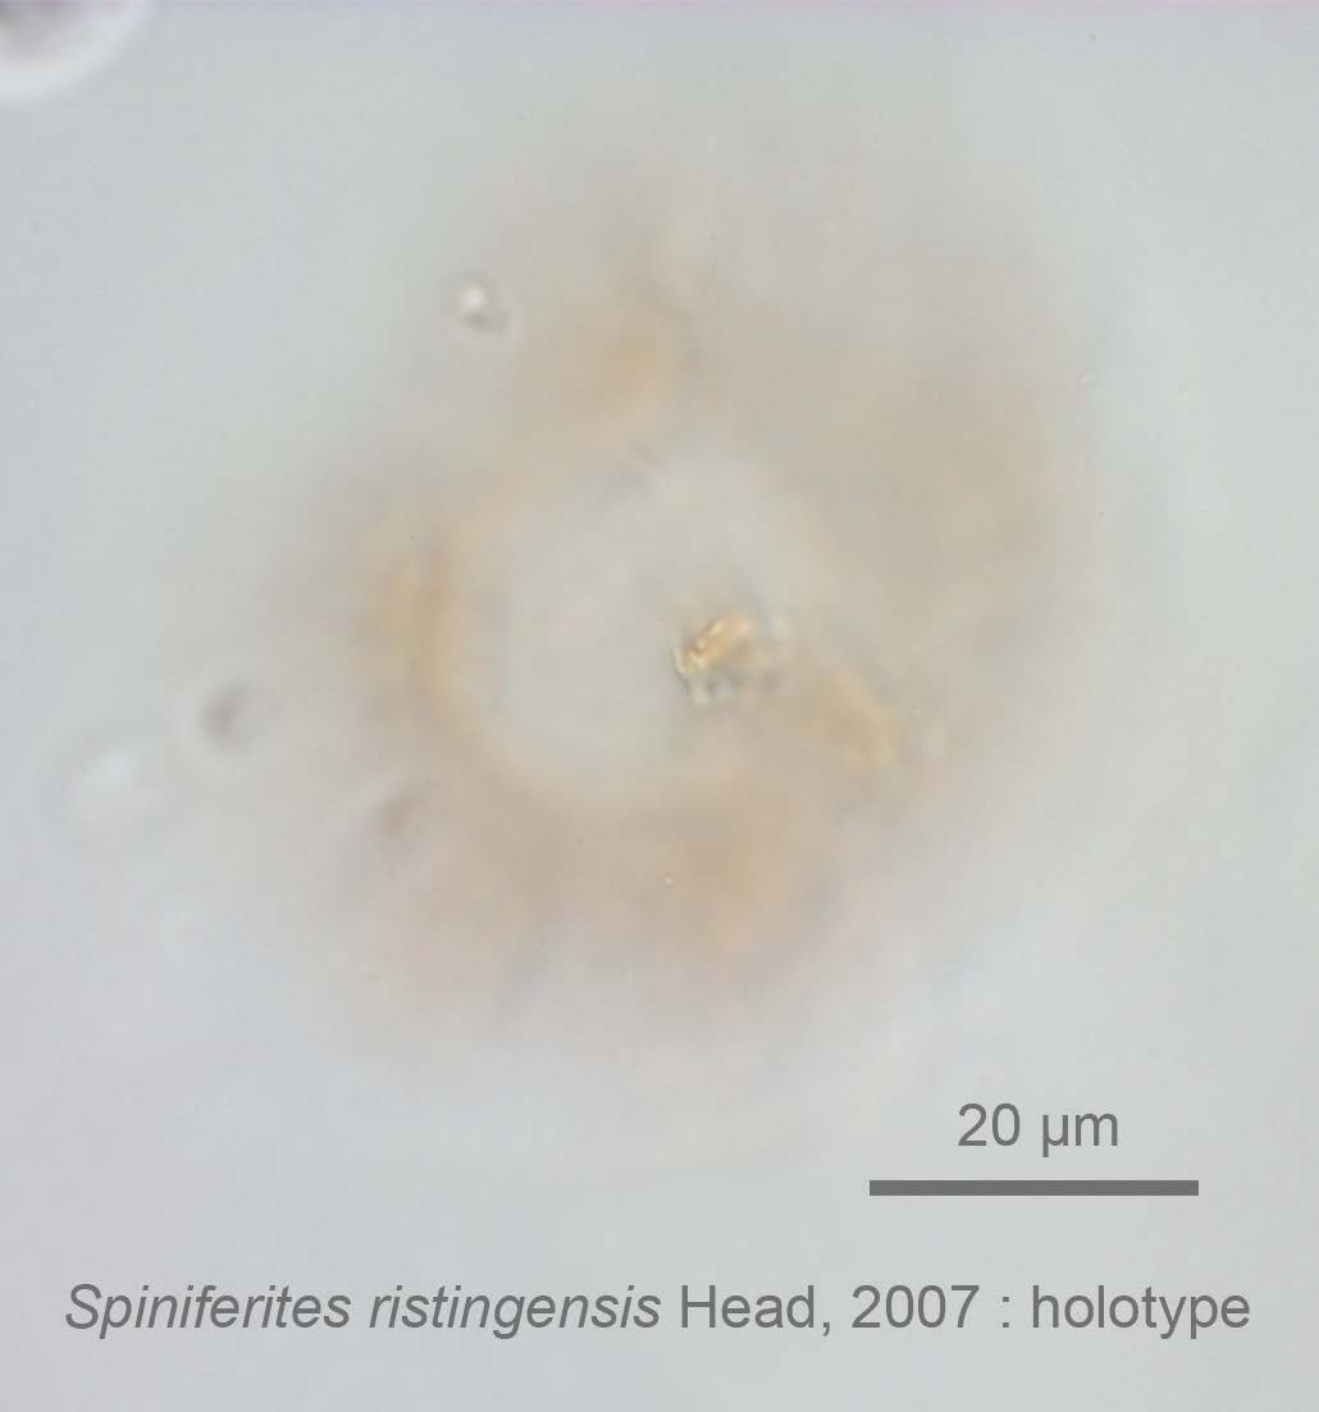

20  $\mu\text{m}$

*Spiniferites ristingensis* Head, 2007 : holotype

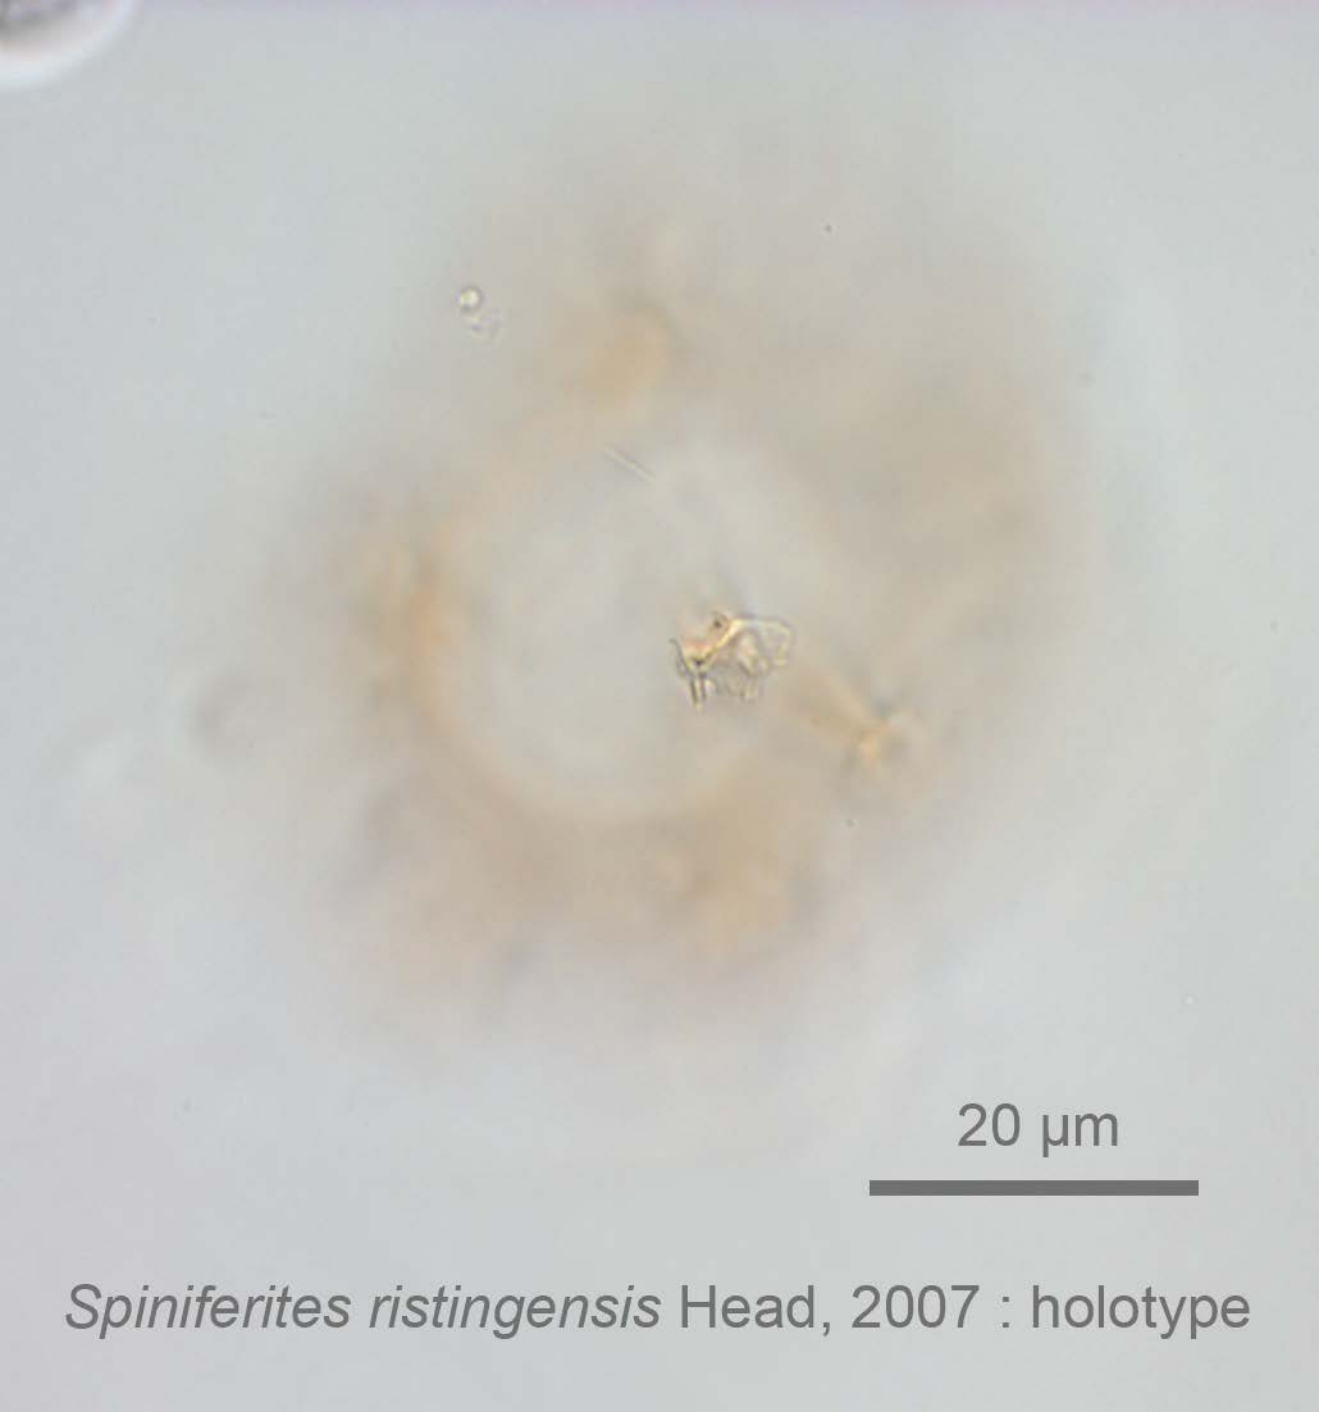

20  $\mu\text{m}$

*Spiniferites ristingensis* Head, 2007 : holotype

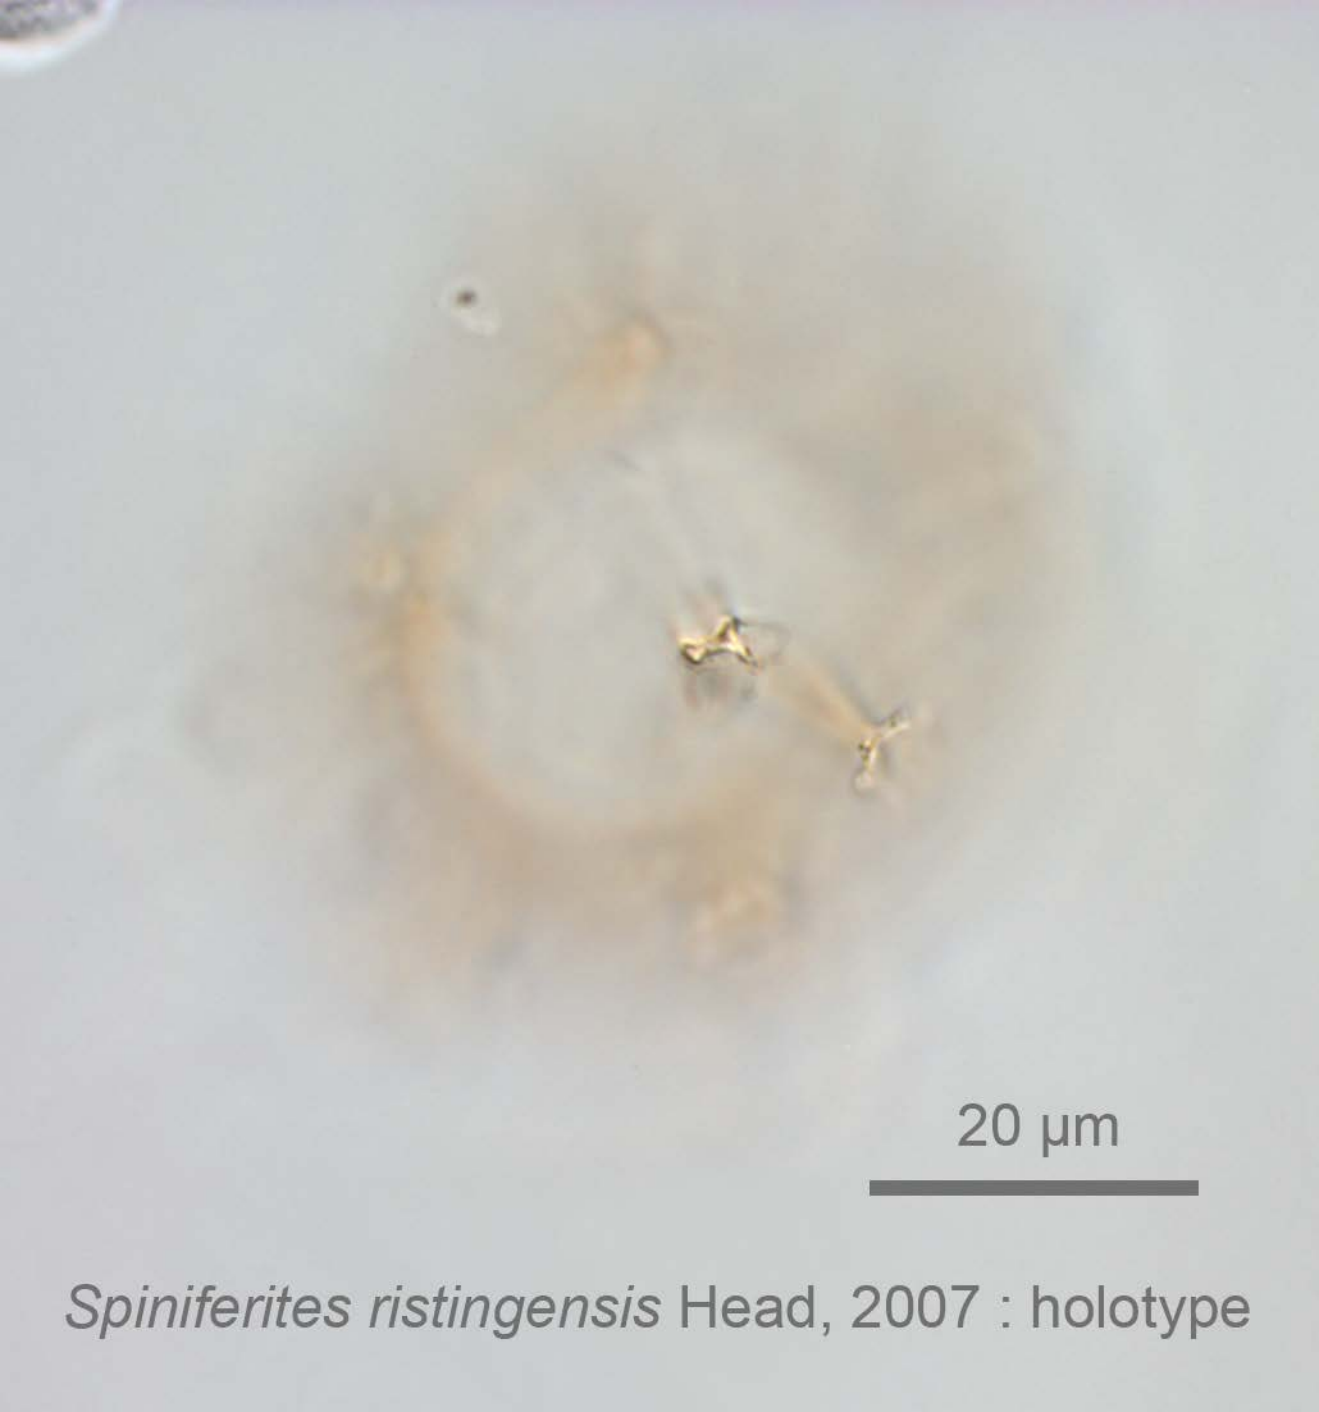

20  $\mu\text{m}$

*Spiniferites ristingensis* Head, 2007 : holotype

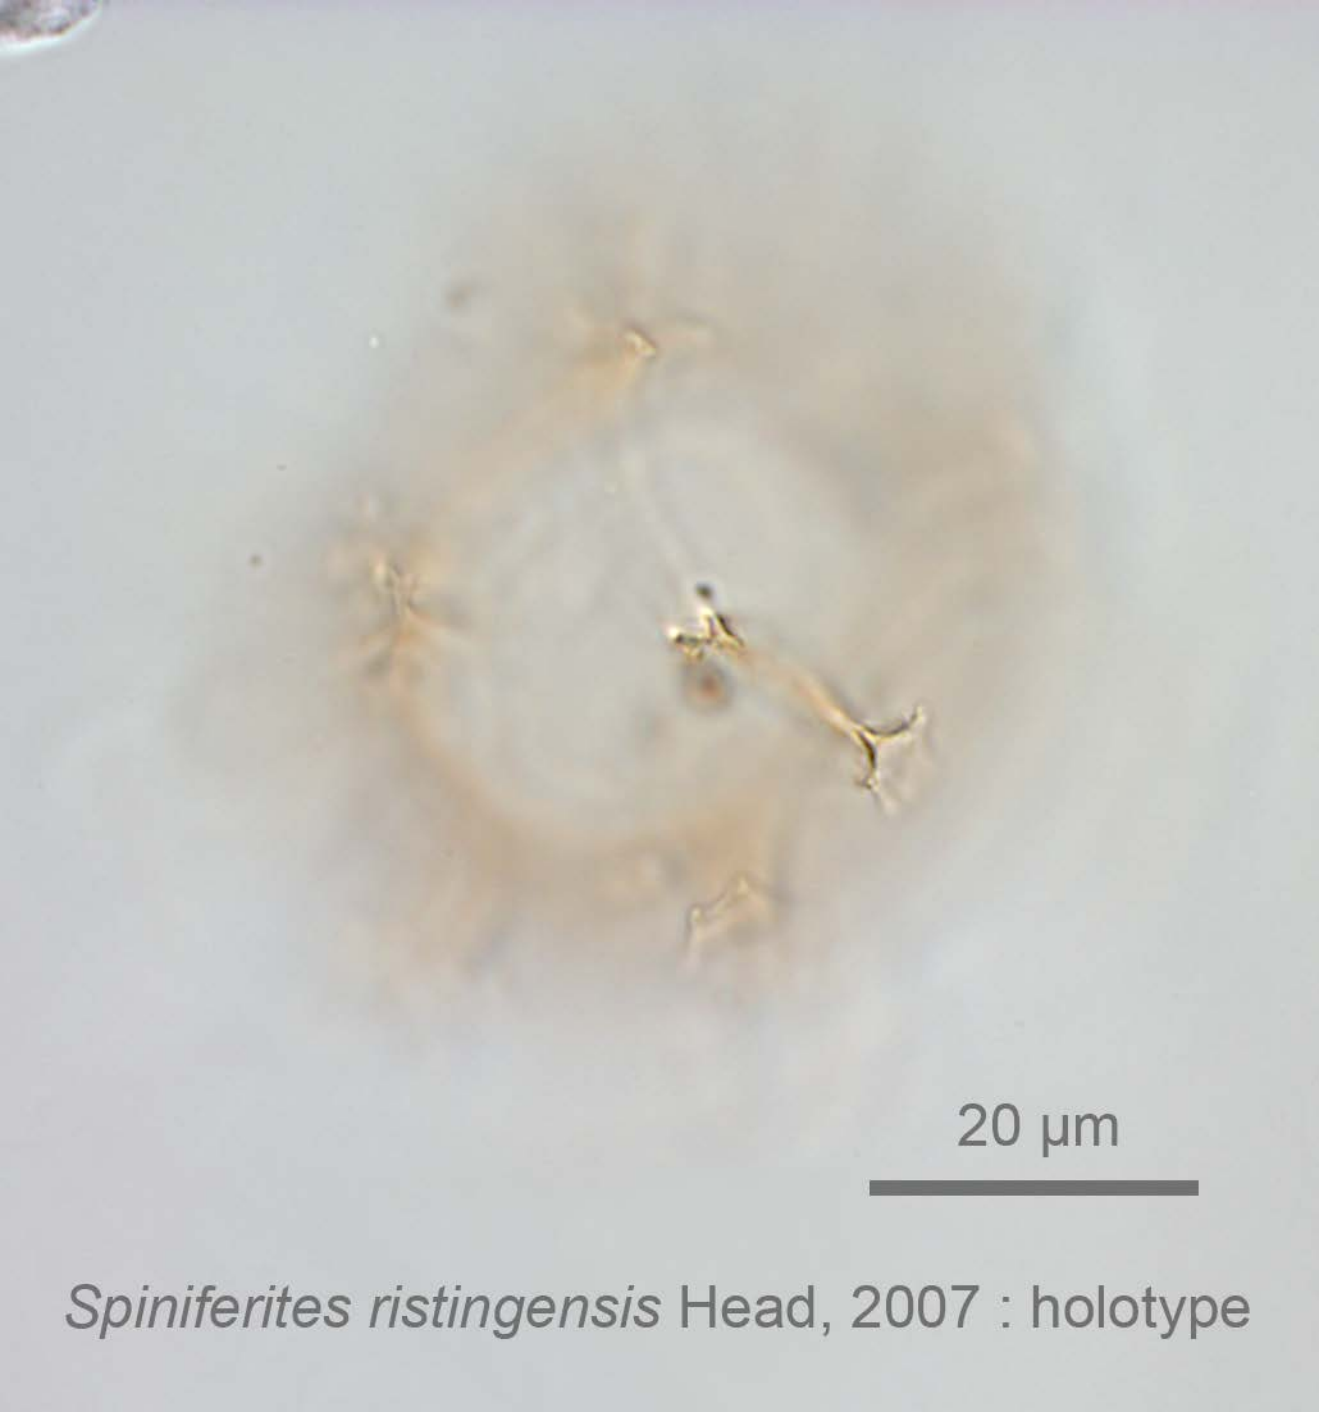

20  $\mu\text{m}$

*Spiniferites ristingensis* Head, 2007 : holotype

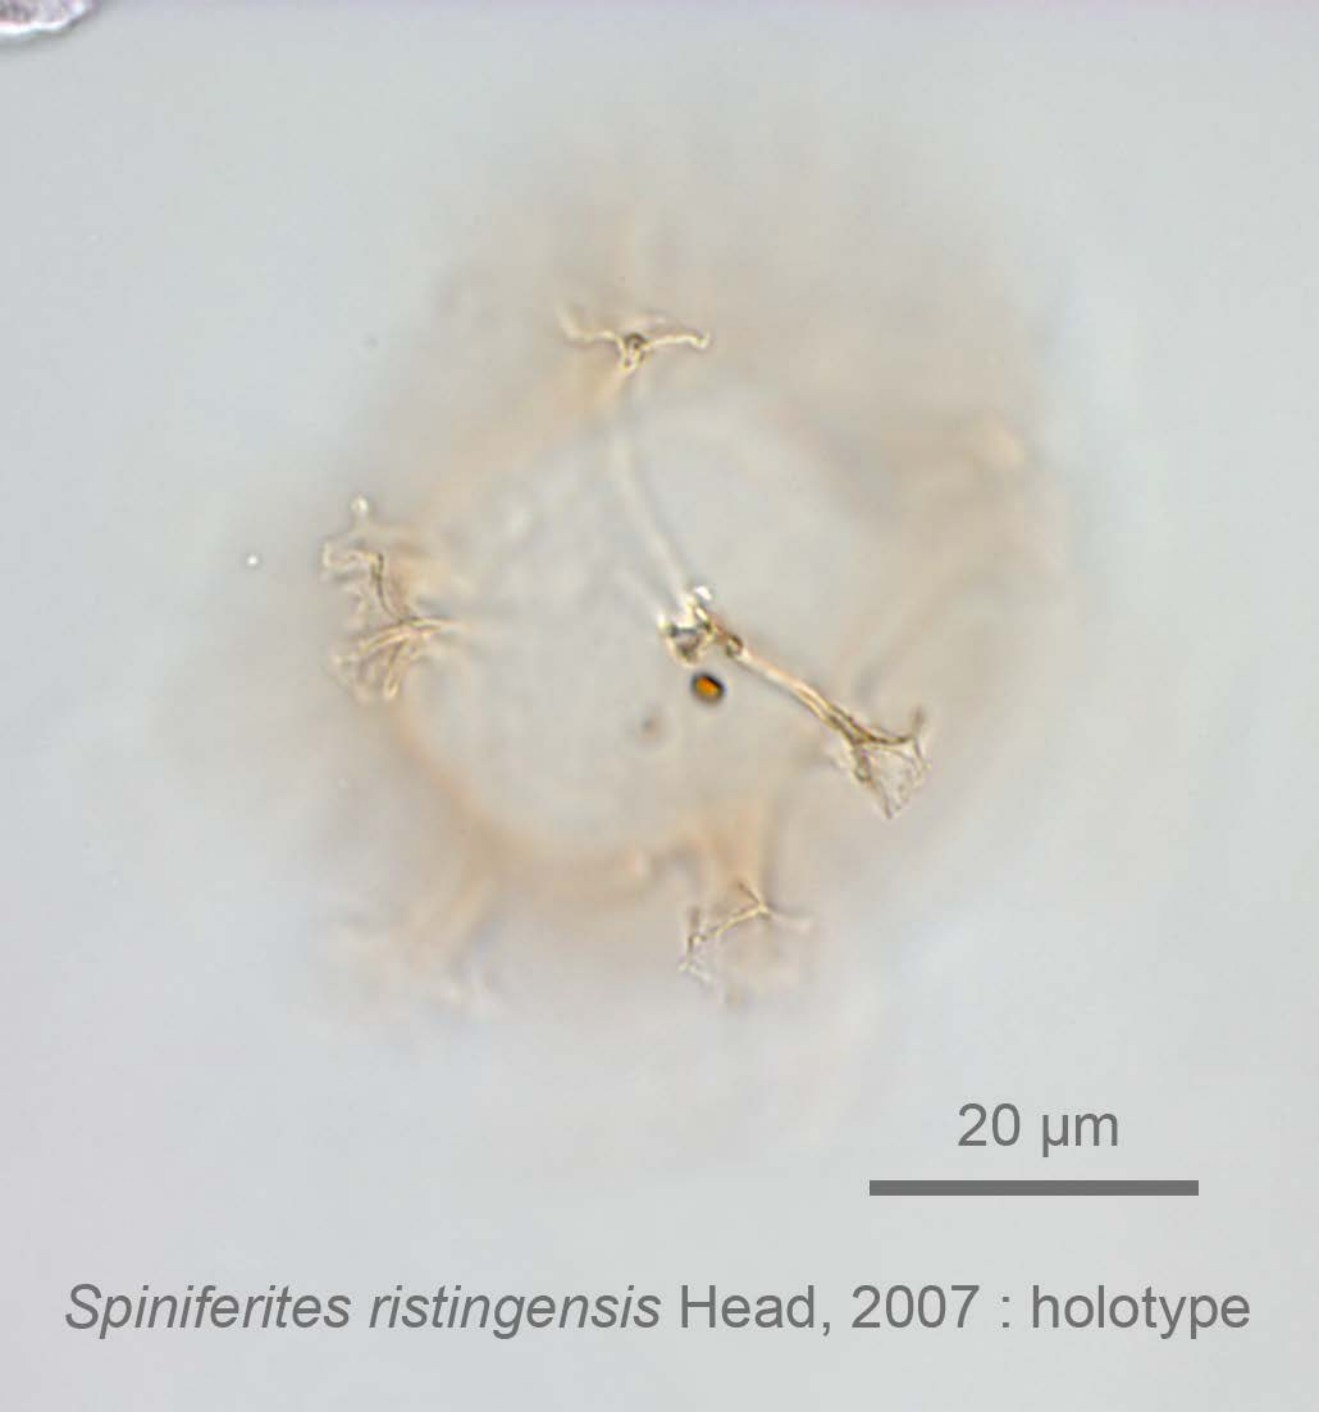

20  $\mu\text{m}$

*Spiniferites ristingensis* Head, 2007 : holotype

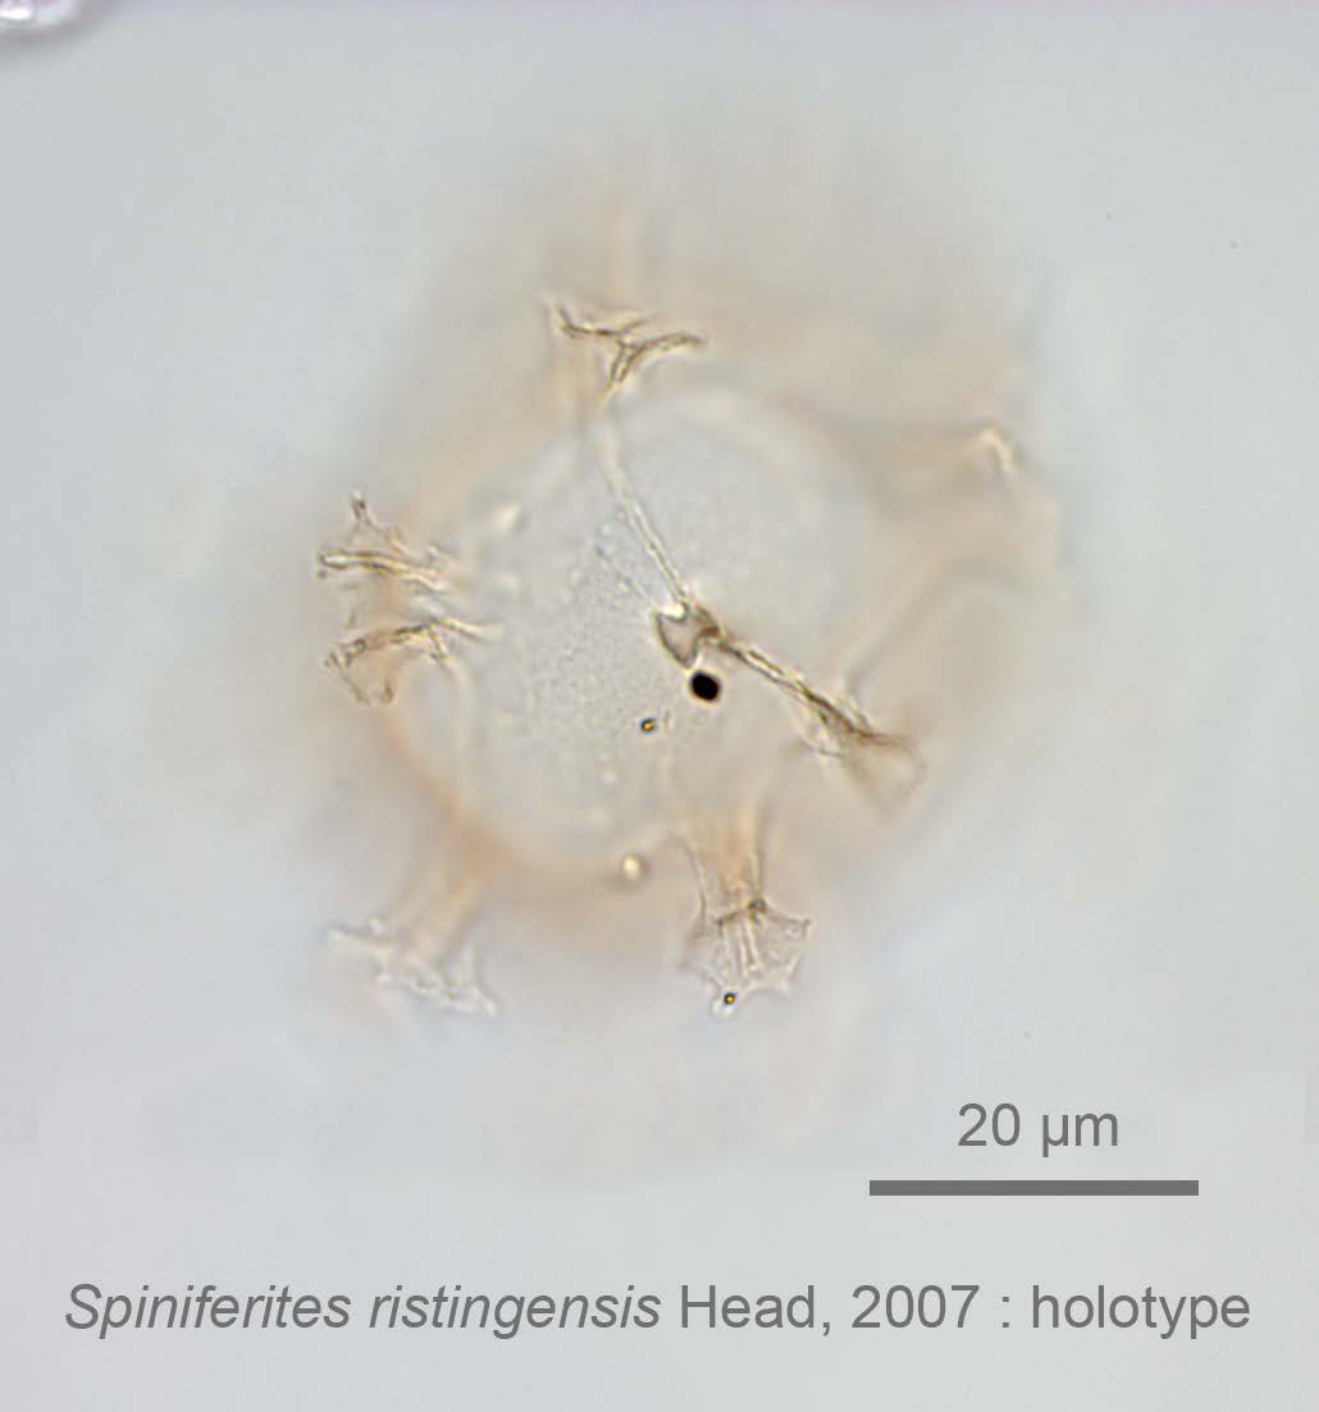

20  $\mu\text{m}$

*Spiniferites ristingensis* Head, 2007 : holotype

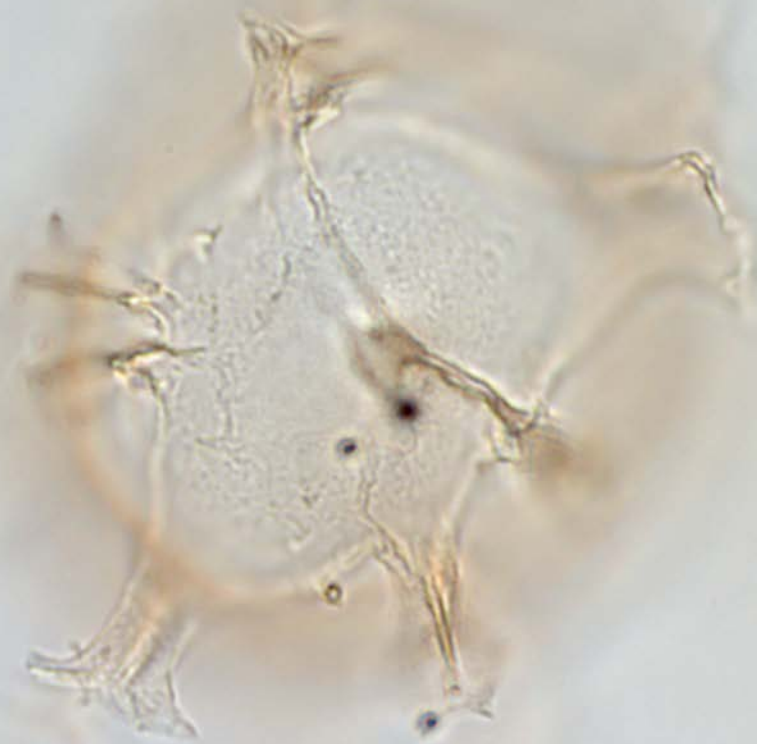

20  $\mu$ m

*Spiniferites ristingensis* Head, 2007 : holotype

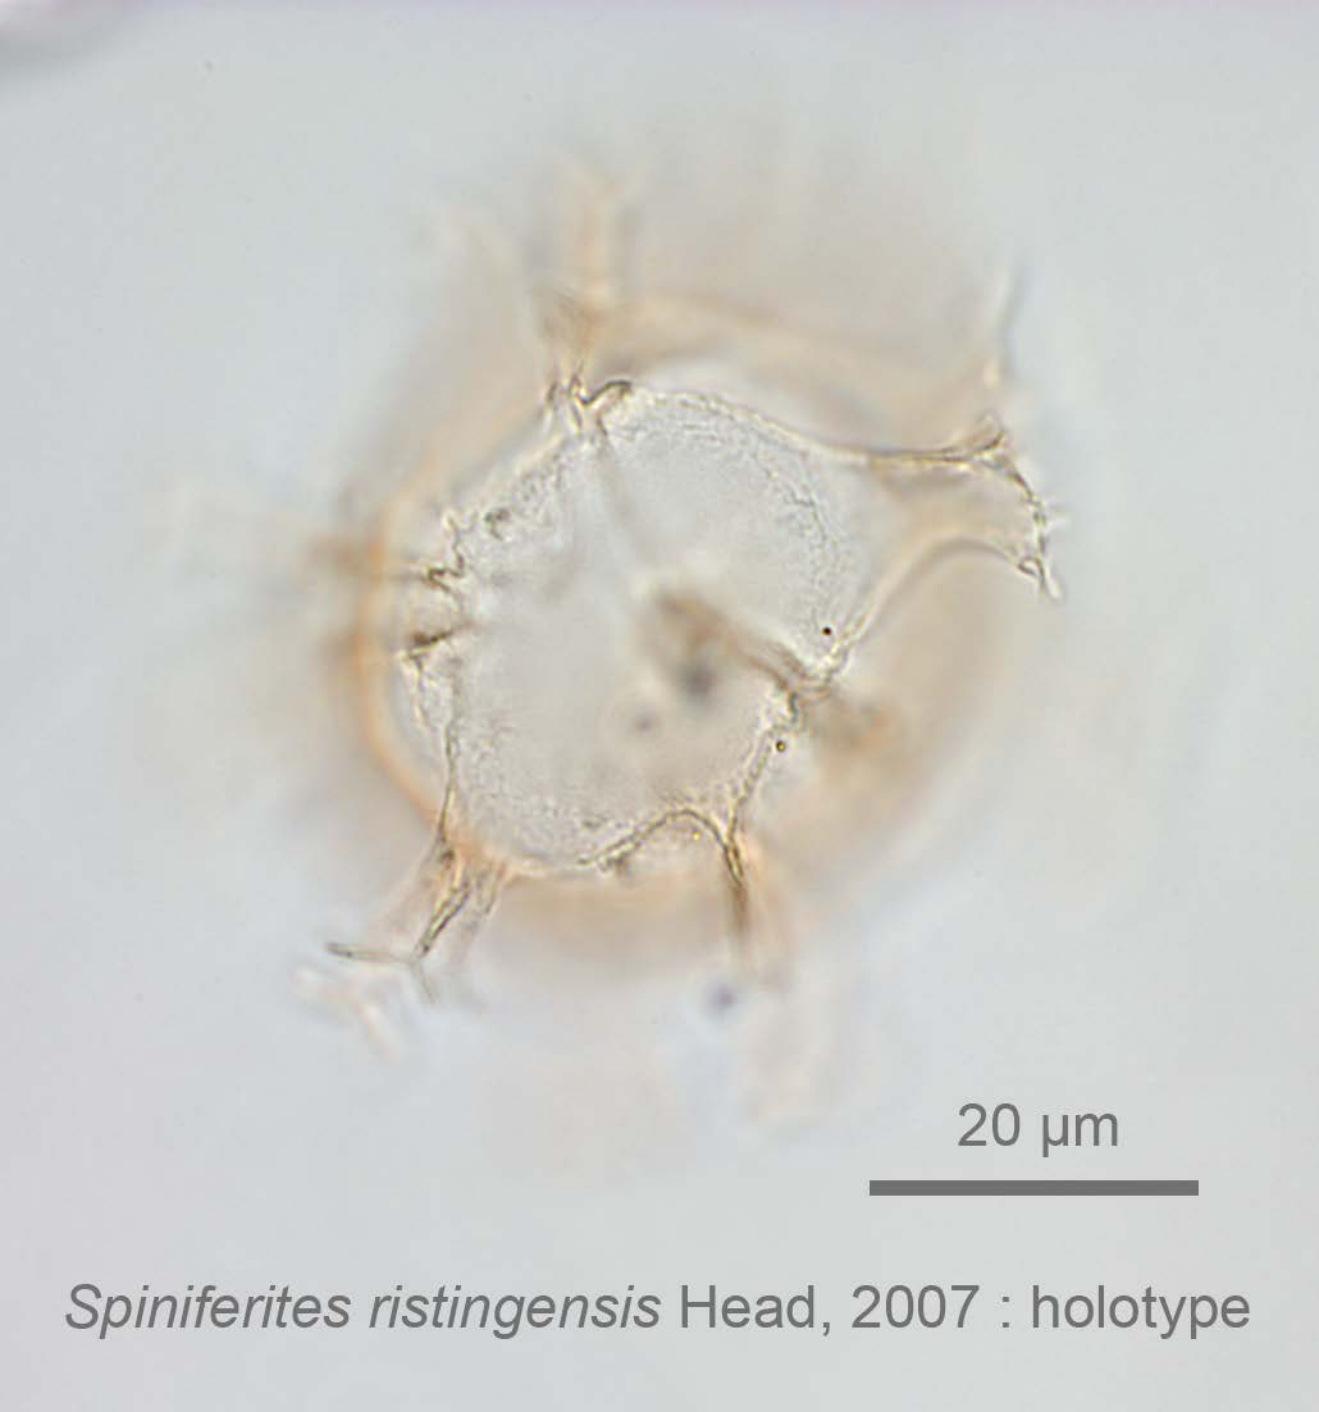

20  $\mu\text{m}$

*Spiniferites ristingensis* Head, 2007 : holotype



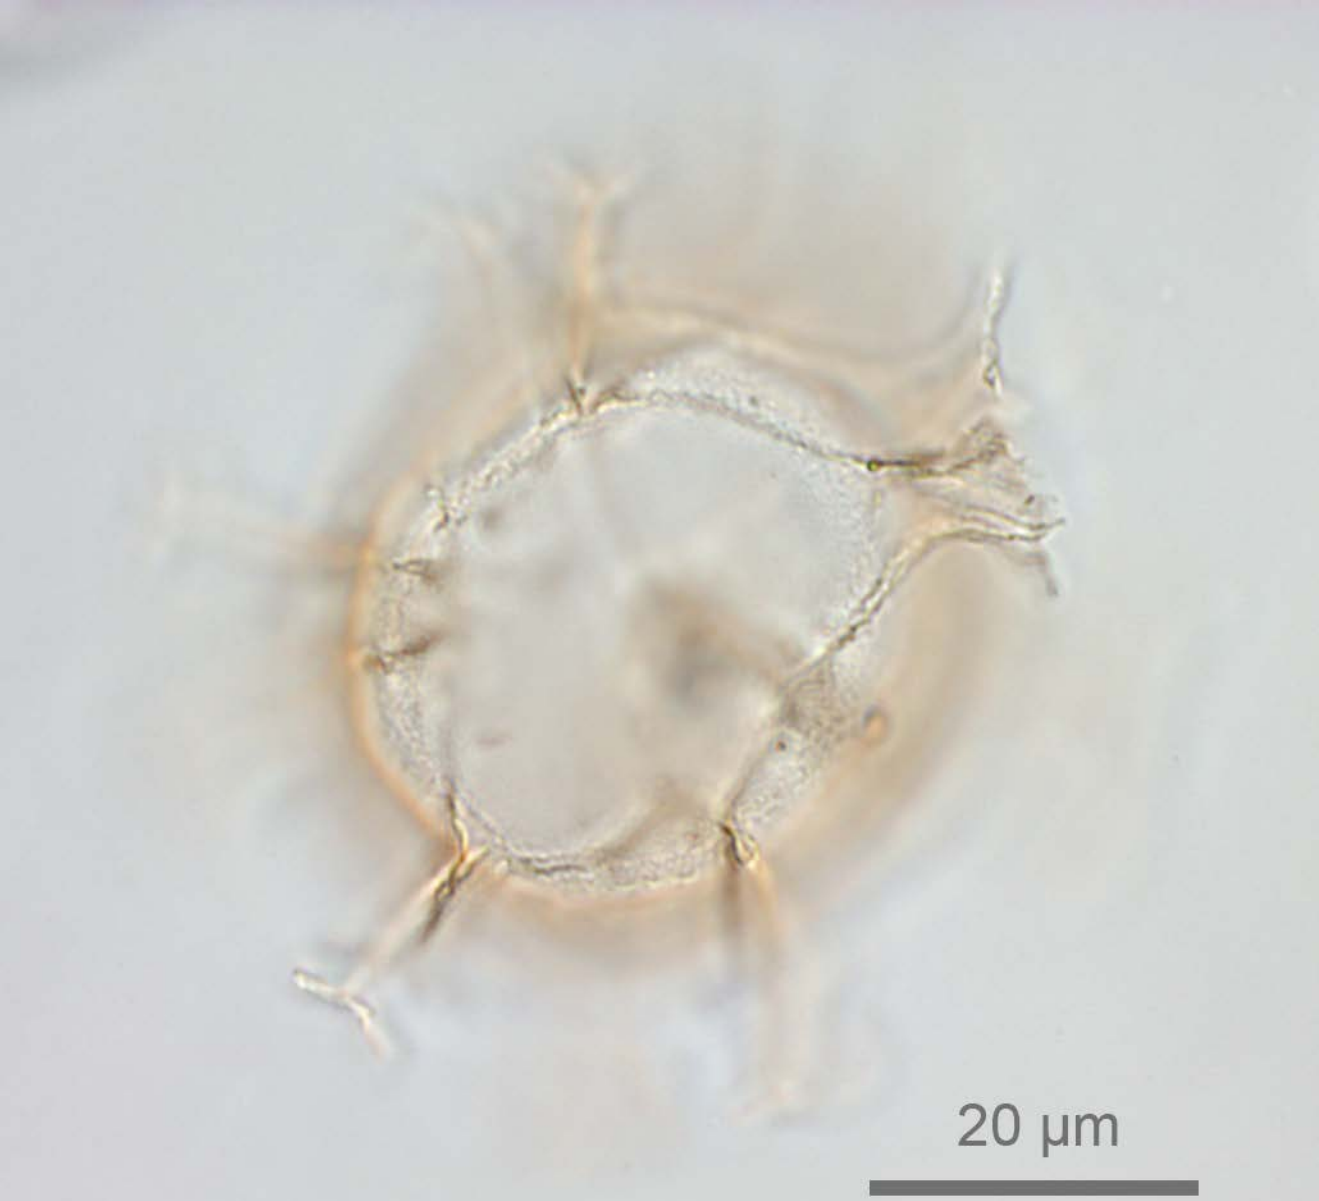

20 μm

*Spiniferites ristingensis* Head, 2007 : holotype

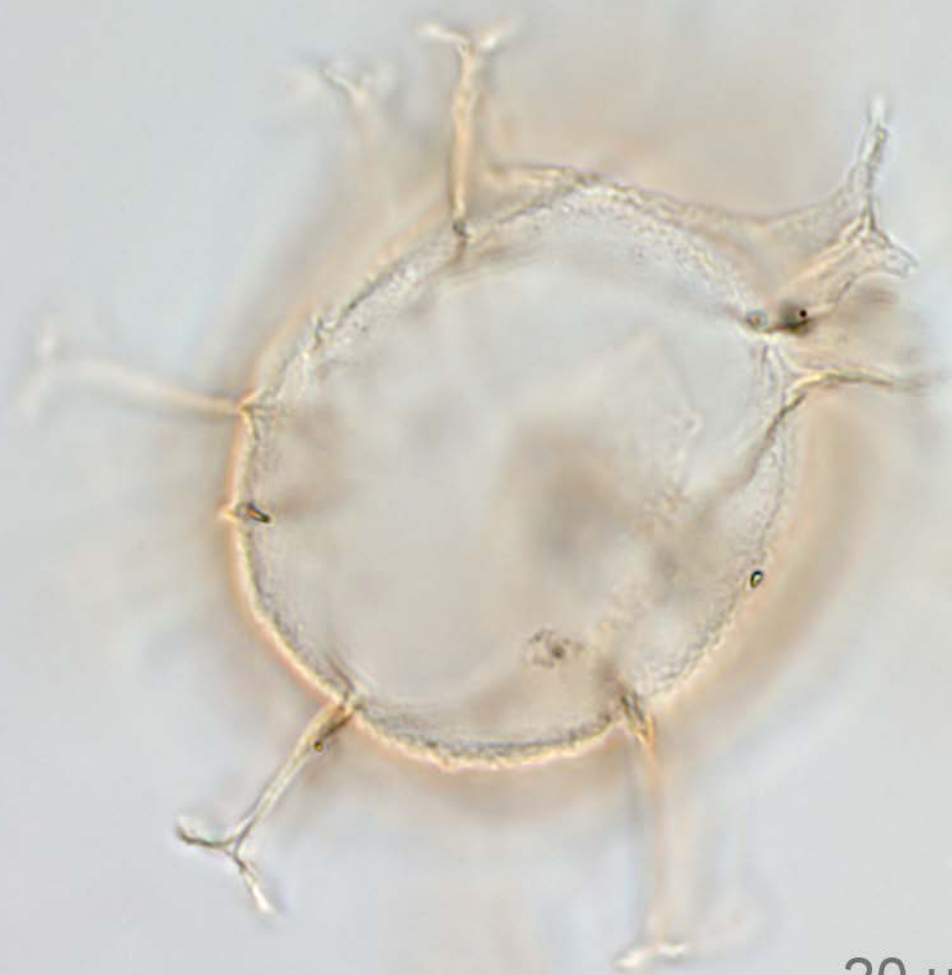

20  $\mu\text{m}$

*Spiniferites ristingensis* Head, 2007 : holotype

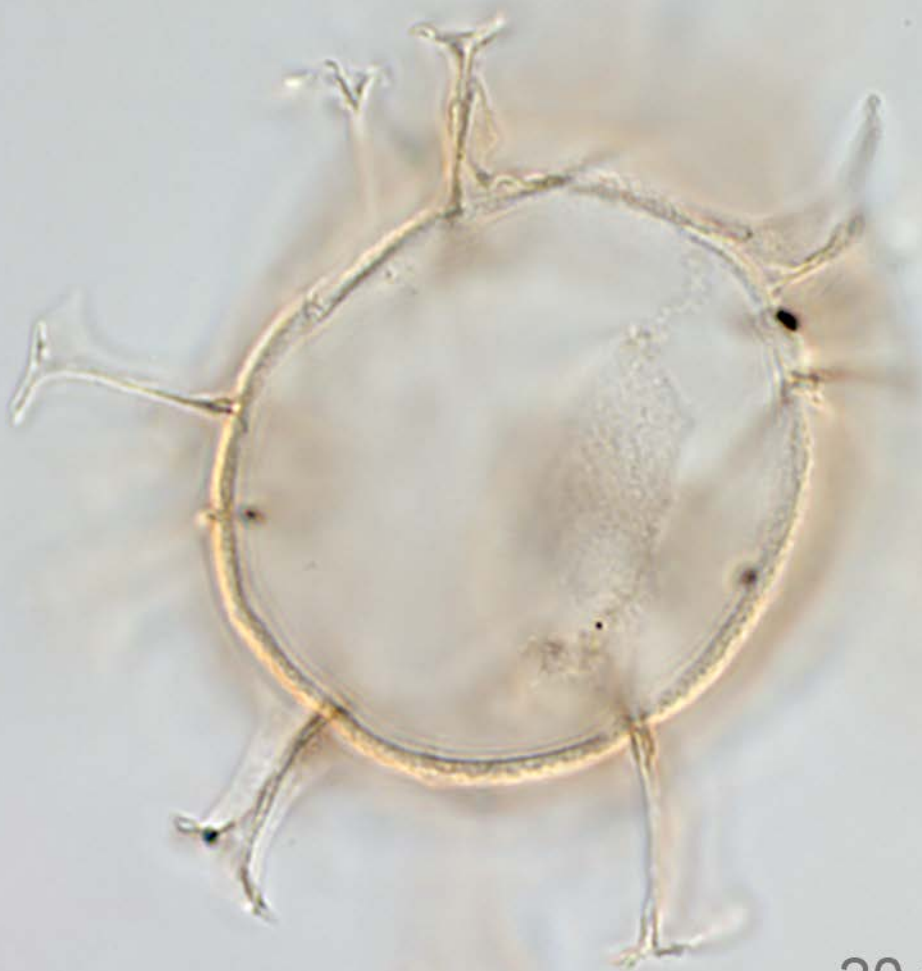

20 μm

*Spiniferites ristingensis* Head, 2007 : holotype

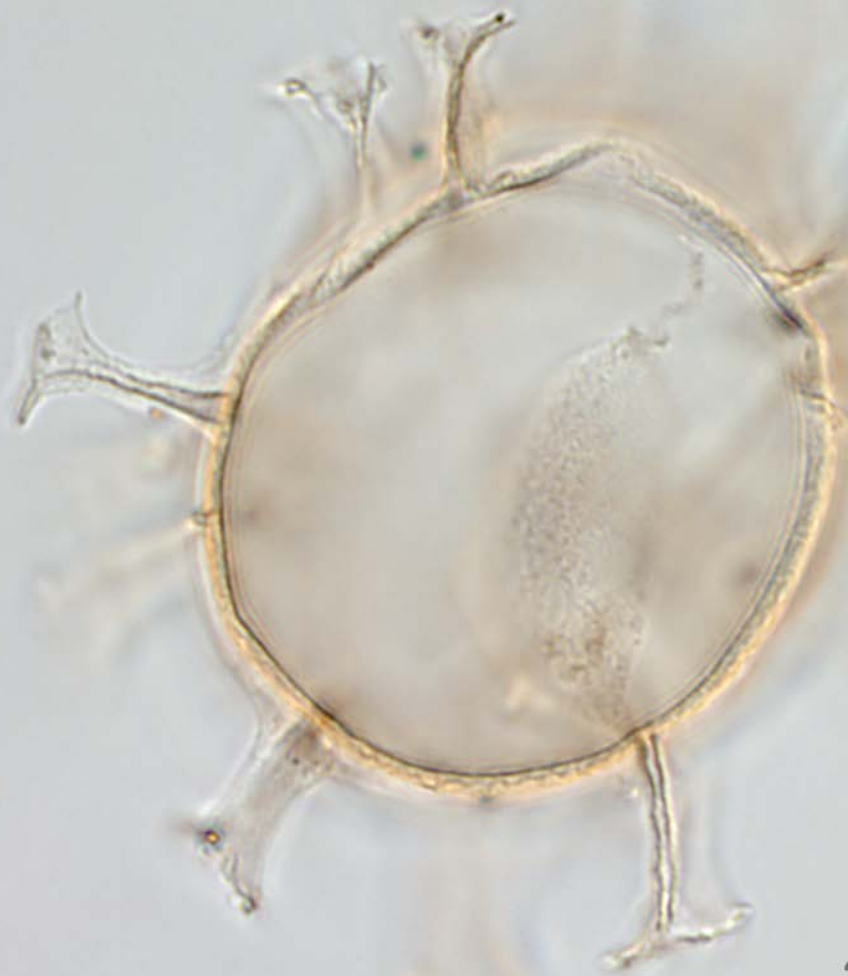

20  $\mu\text{m}$

*Spiniferites ristingensis* Head, 2007 : holotype

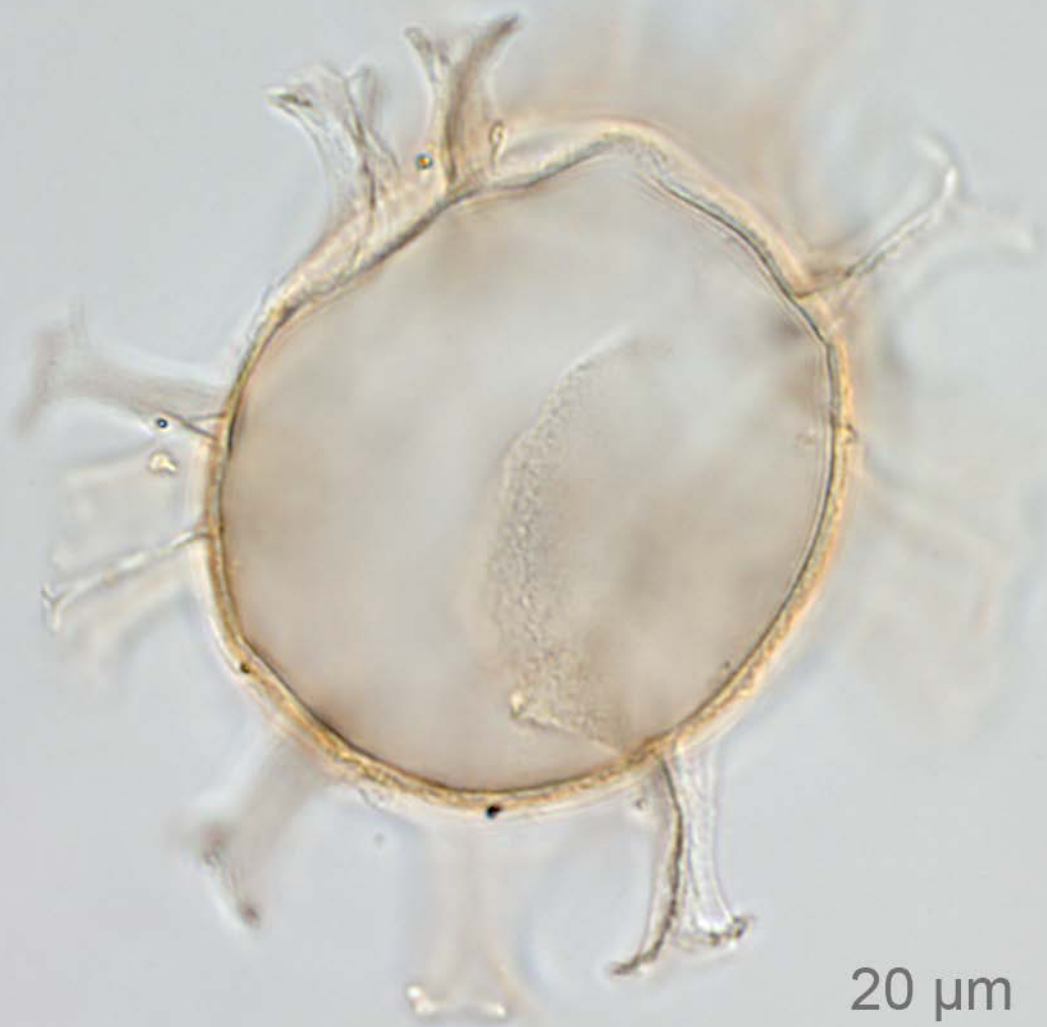

20 μm

*Spiniferites ristingensis* Head, 2007 : holotype

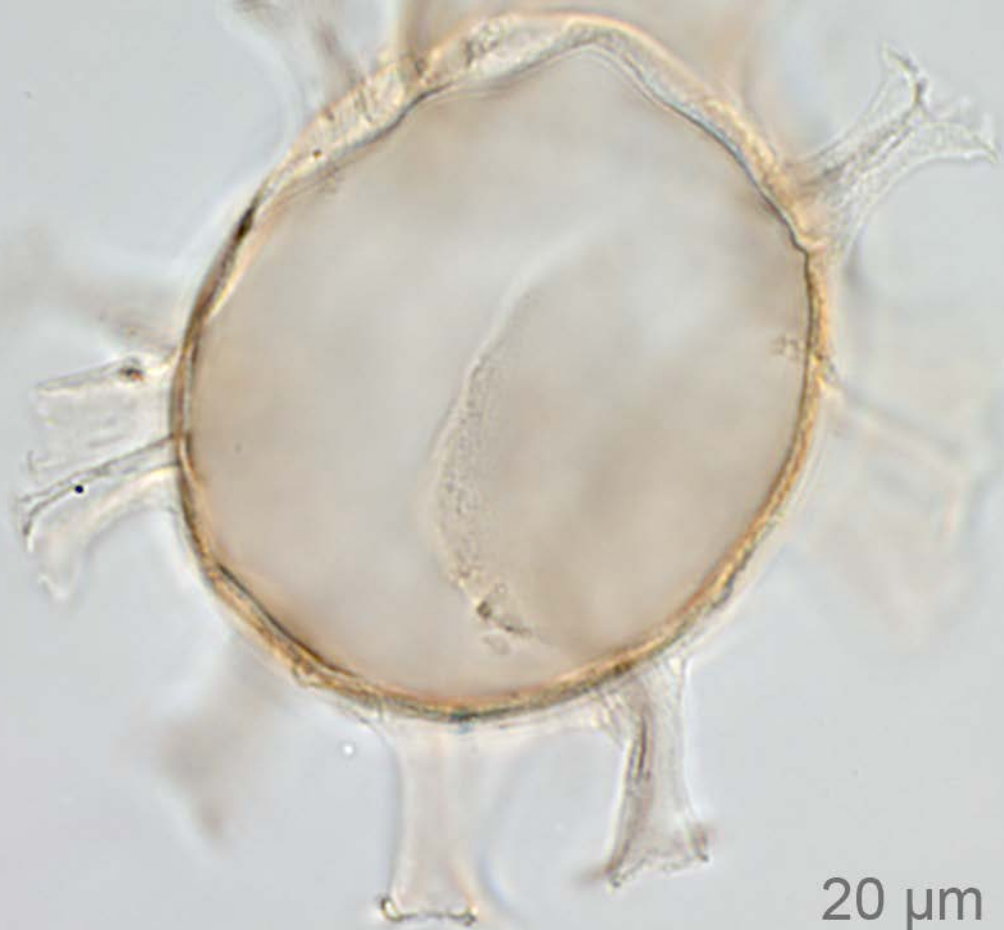

*Spiniferites ristingensis* Head, 2007 : holotype

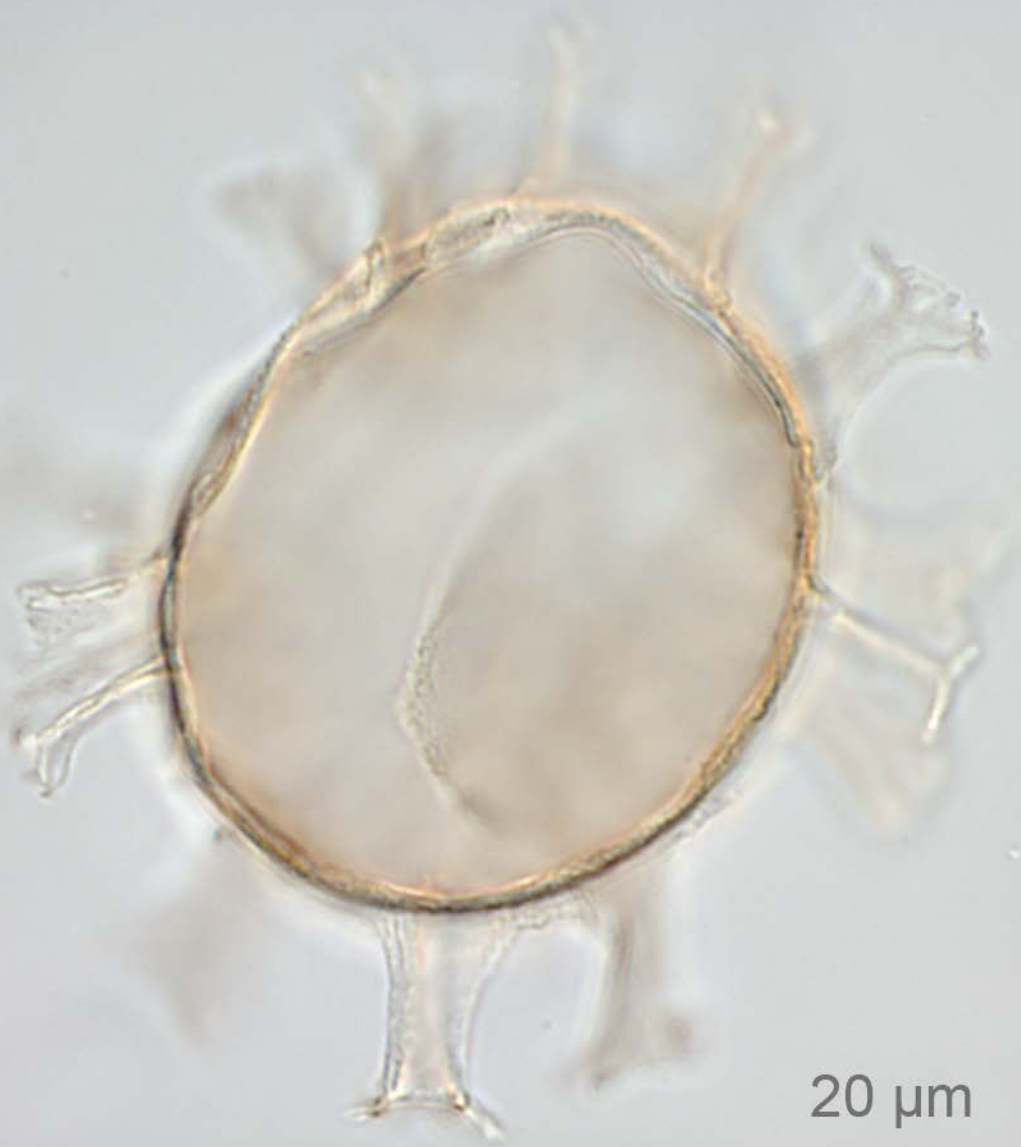

*Spiniferites ristingensis* Head, 2007 : holotype



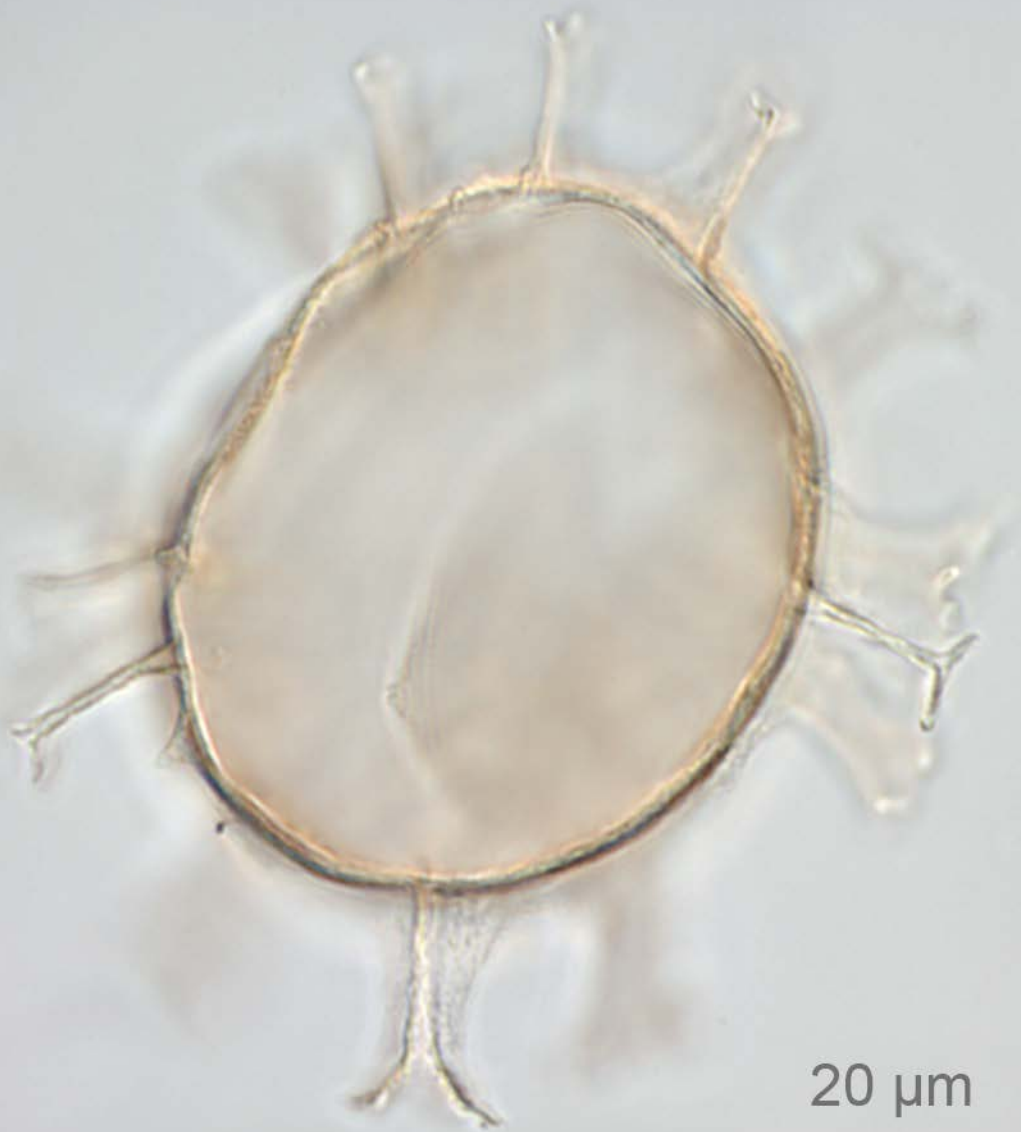

20 μm

*Spiniferites ristingensis* Head, 2007 : holotype



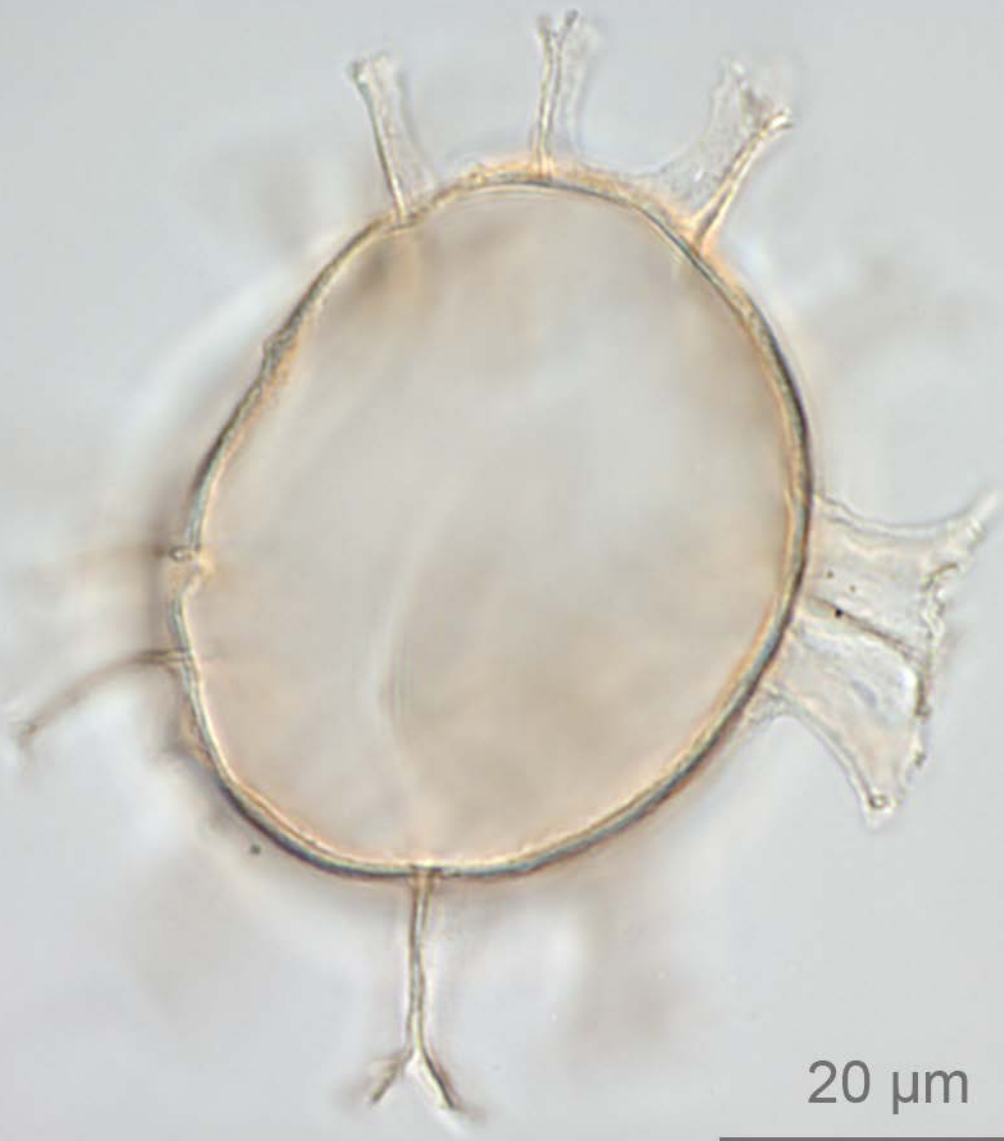

20  $\mu\text{m}$

*Spiniferites ristingensis* Head, 2007 : holotype

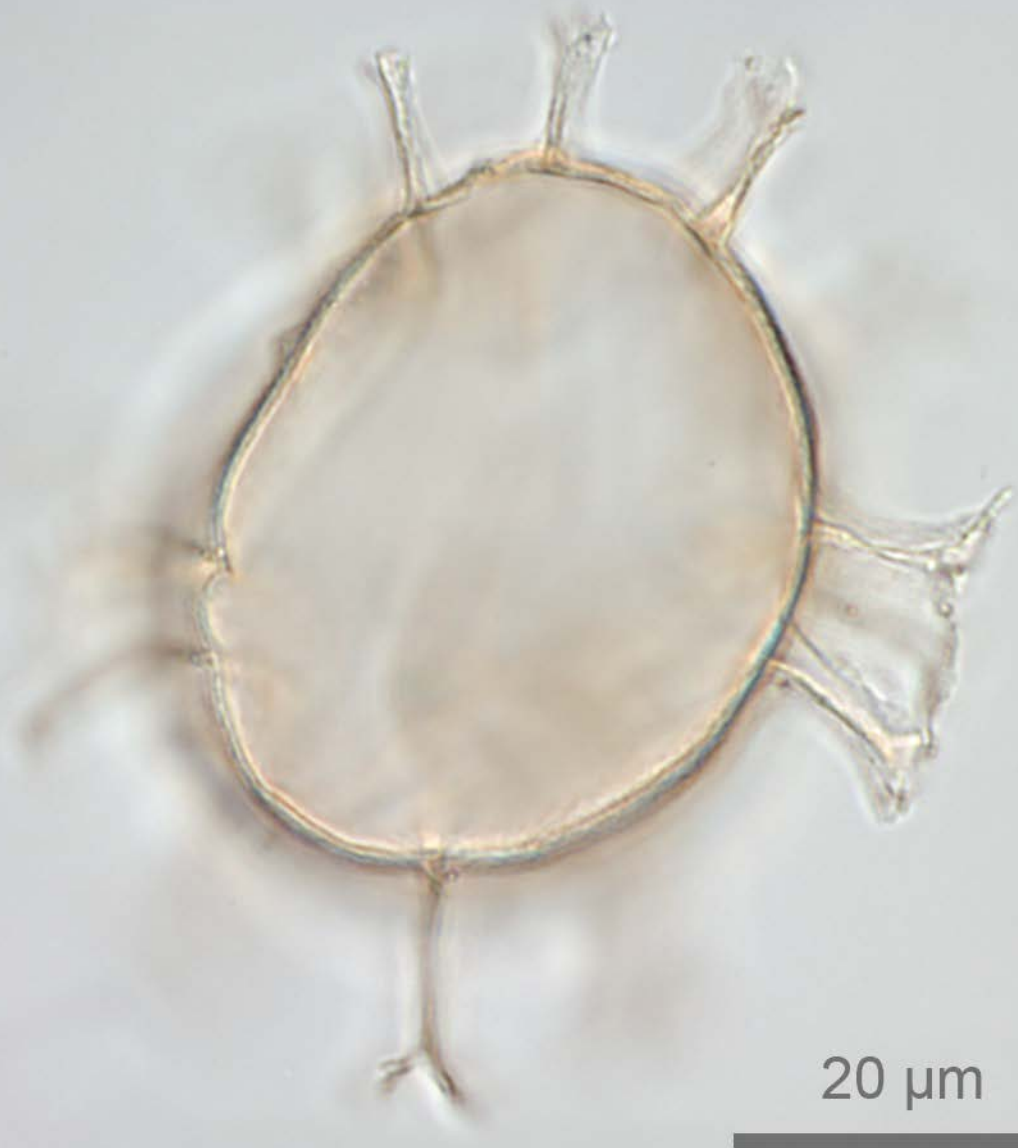

20 μm

*Spiniferites ristingensis* Head, 2007 : holotype

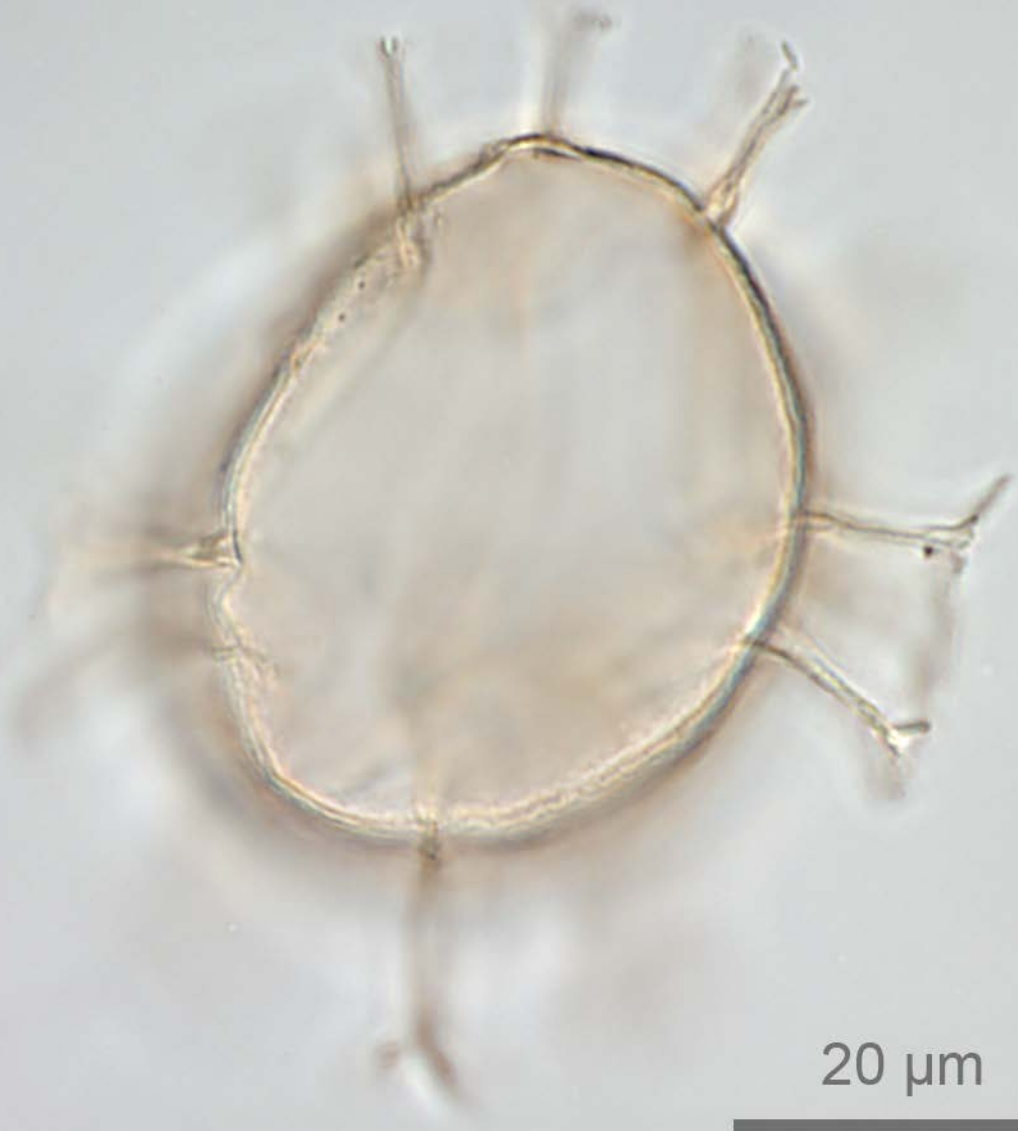

20  $\mu\text{m}$

*Spiniferites ristingensis* Head, 2007 : holotype

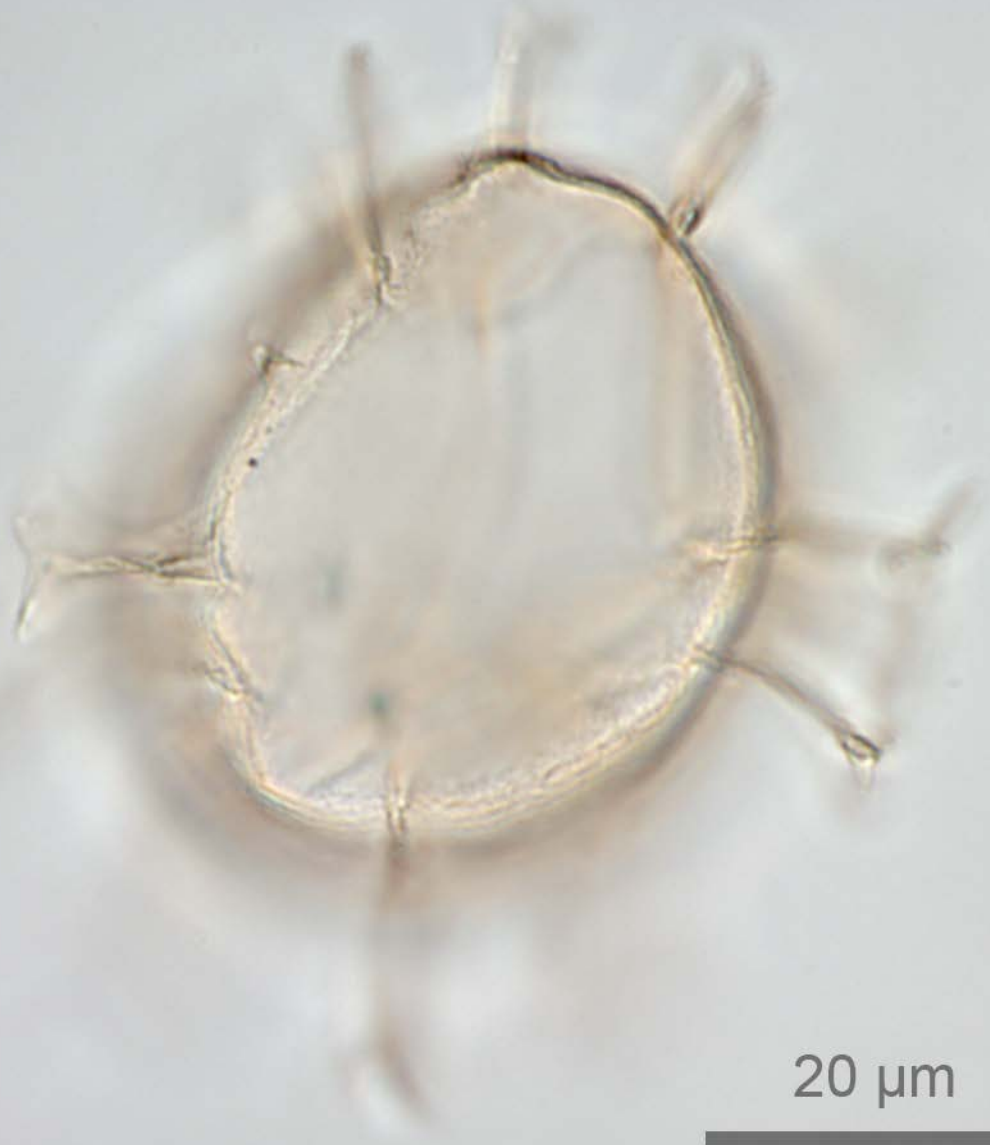

20  $\mu\text{m}$

*Spiniferites ristingensis* Head, 2007 : holotype

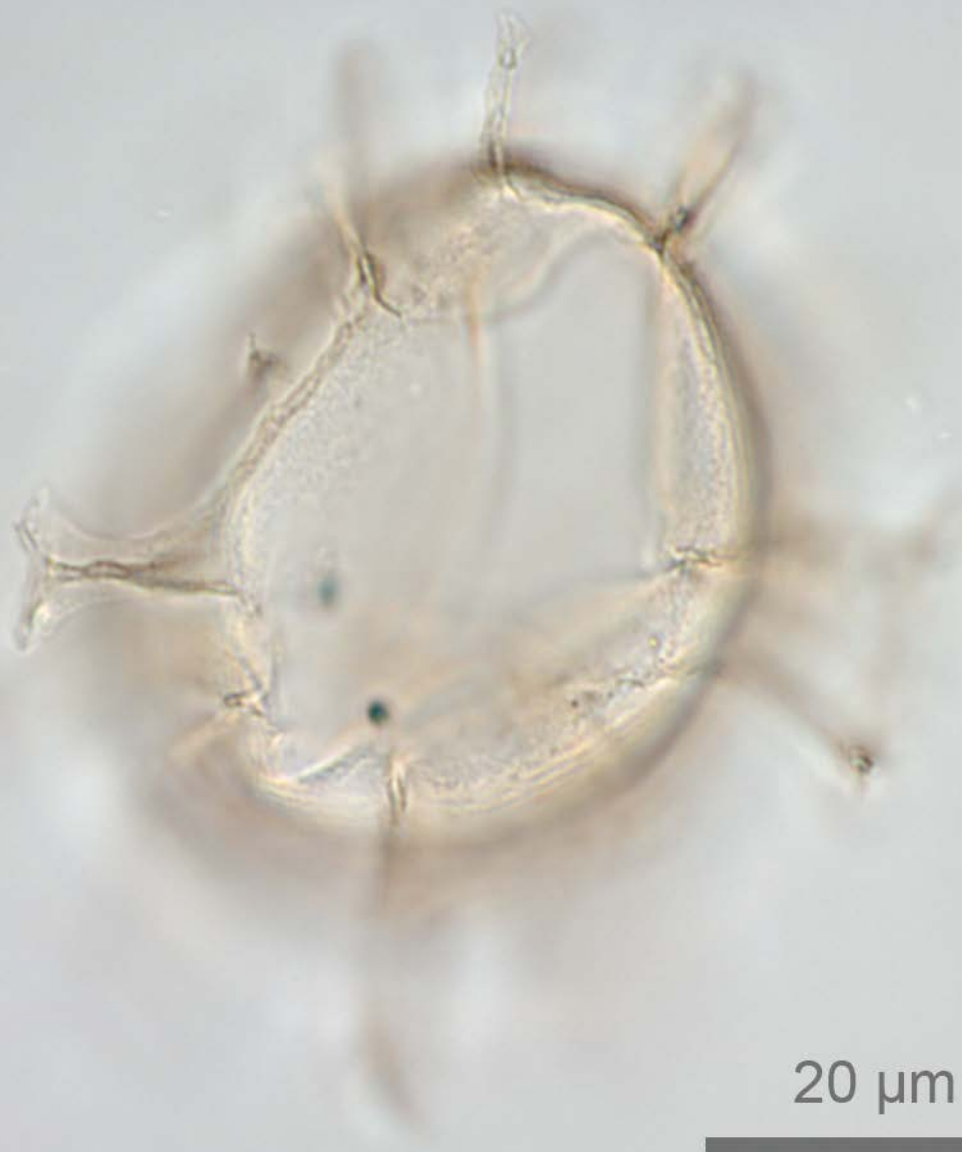

*Spiniferites ristingensis* Head, 2007 : holotype

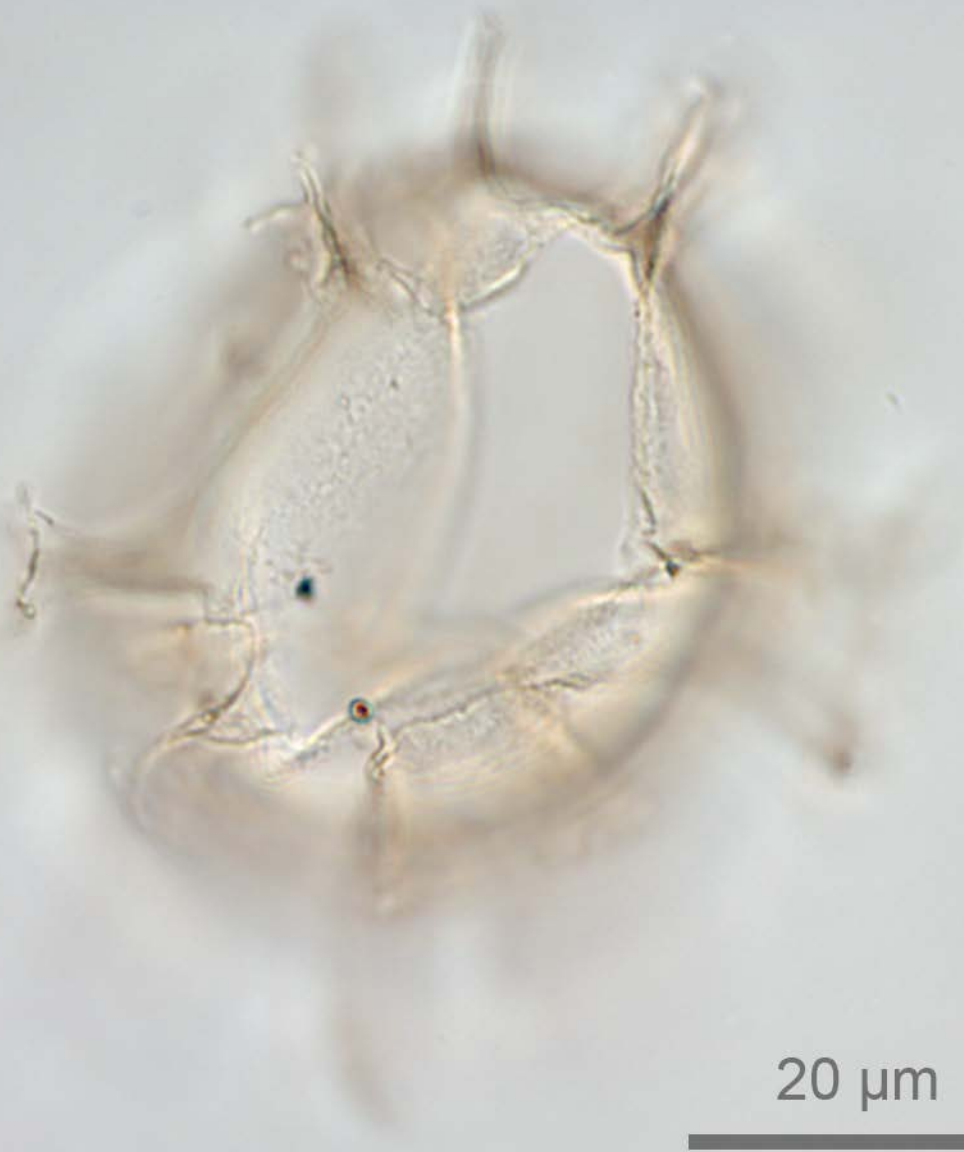

20  $\mu\text{m}$

*Spiniferites ristingensis* Head, 2007 : holotype

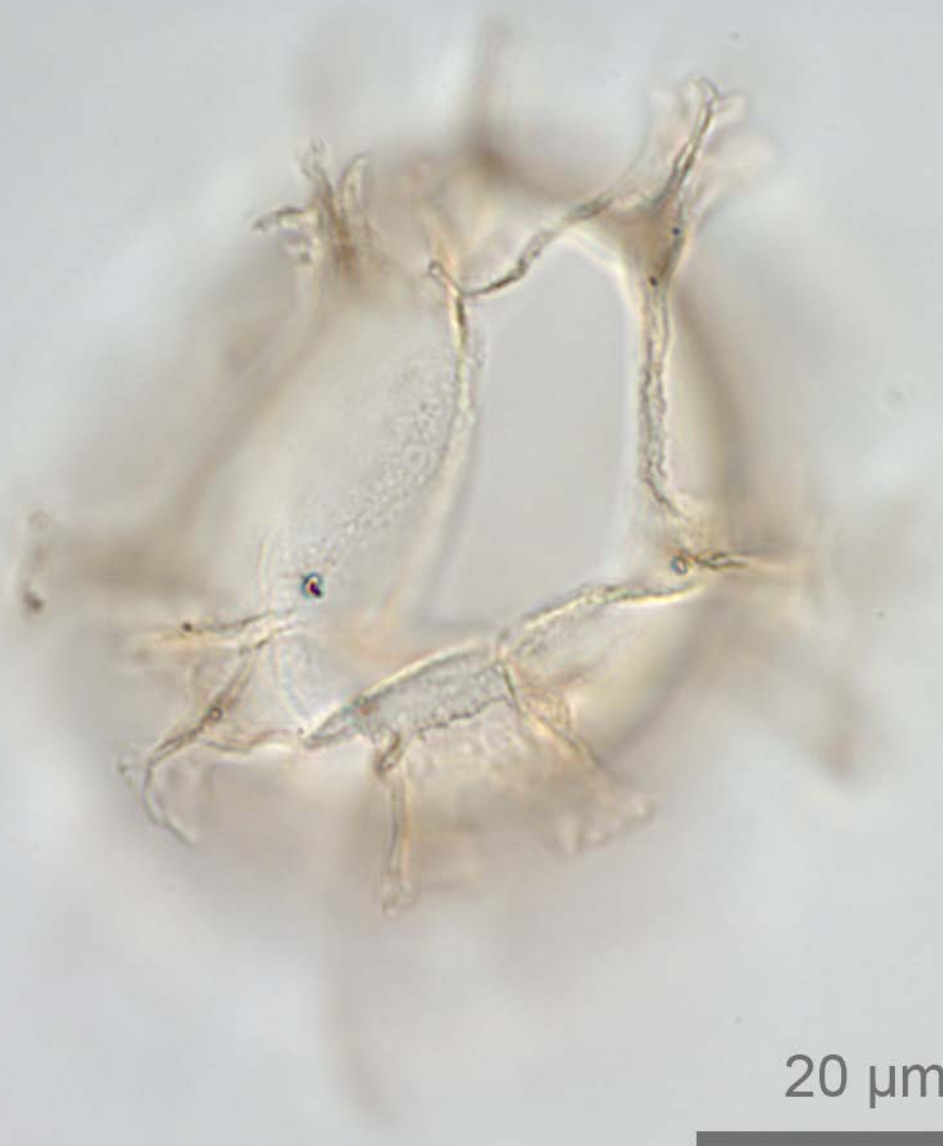

*Spiniferites ristingensis* Head, 2007 : holotype

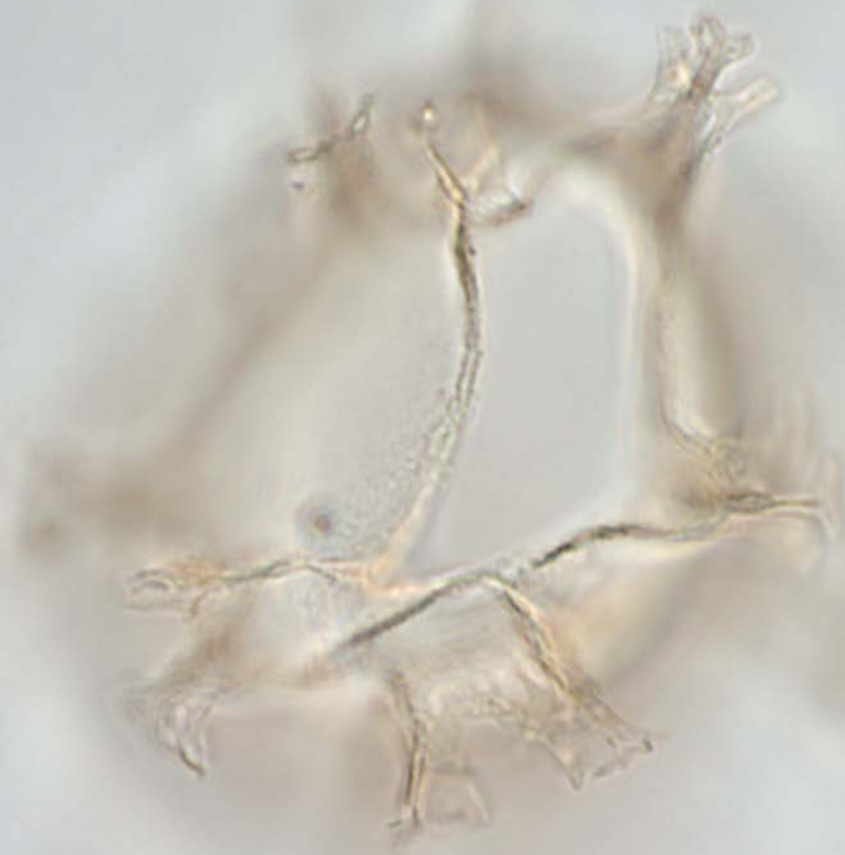

20  $\mu\text{m}$

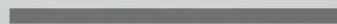

*Spiniferites ristingensis* Head, 2007 : holotype



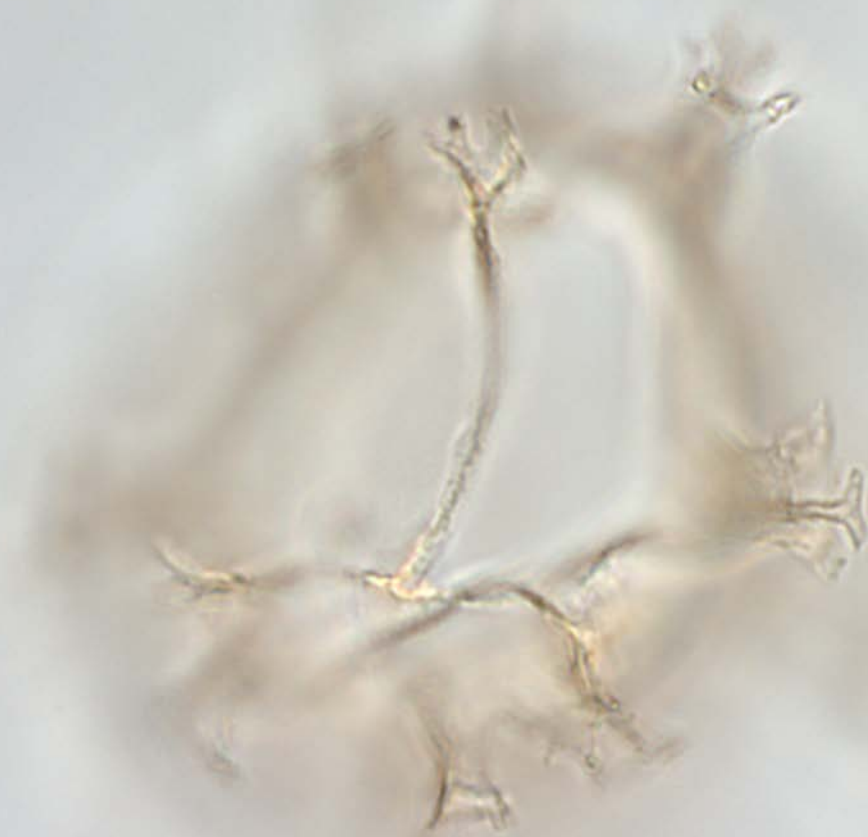

20  $\mu\text{m}$

*Spiniferites ristingensis* Head, 2007 : holotype

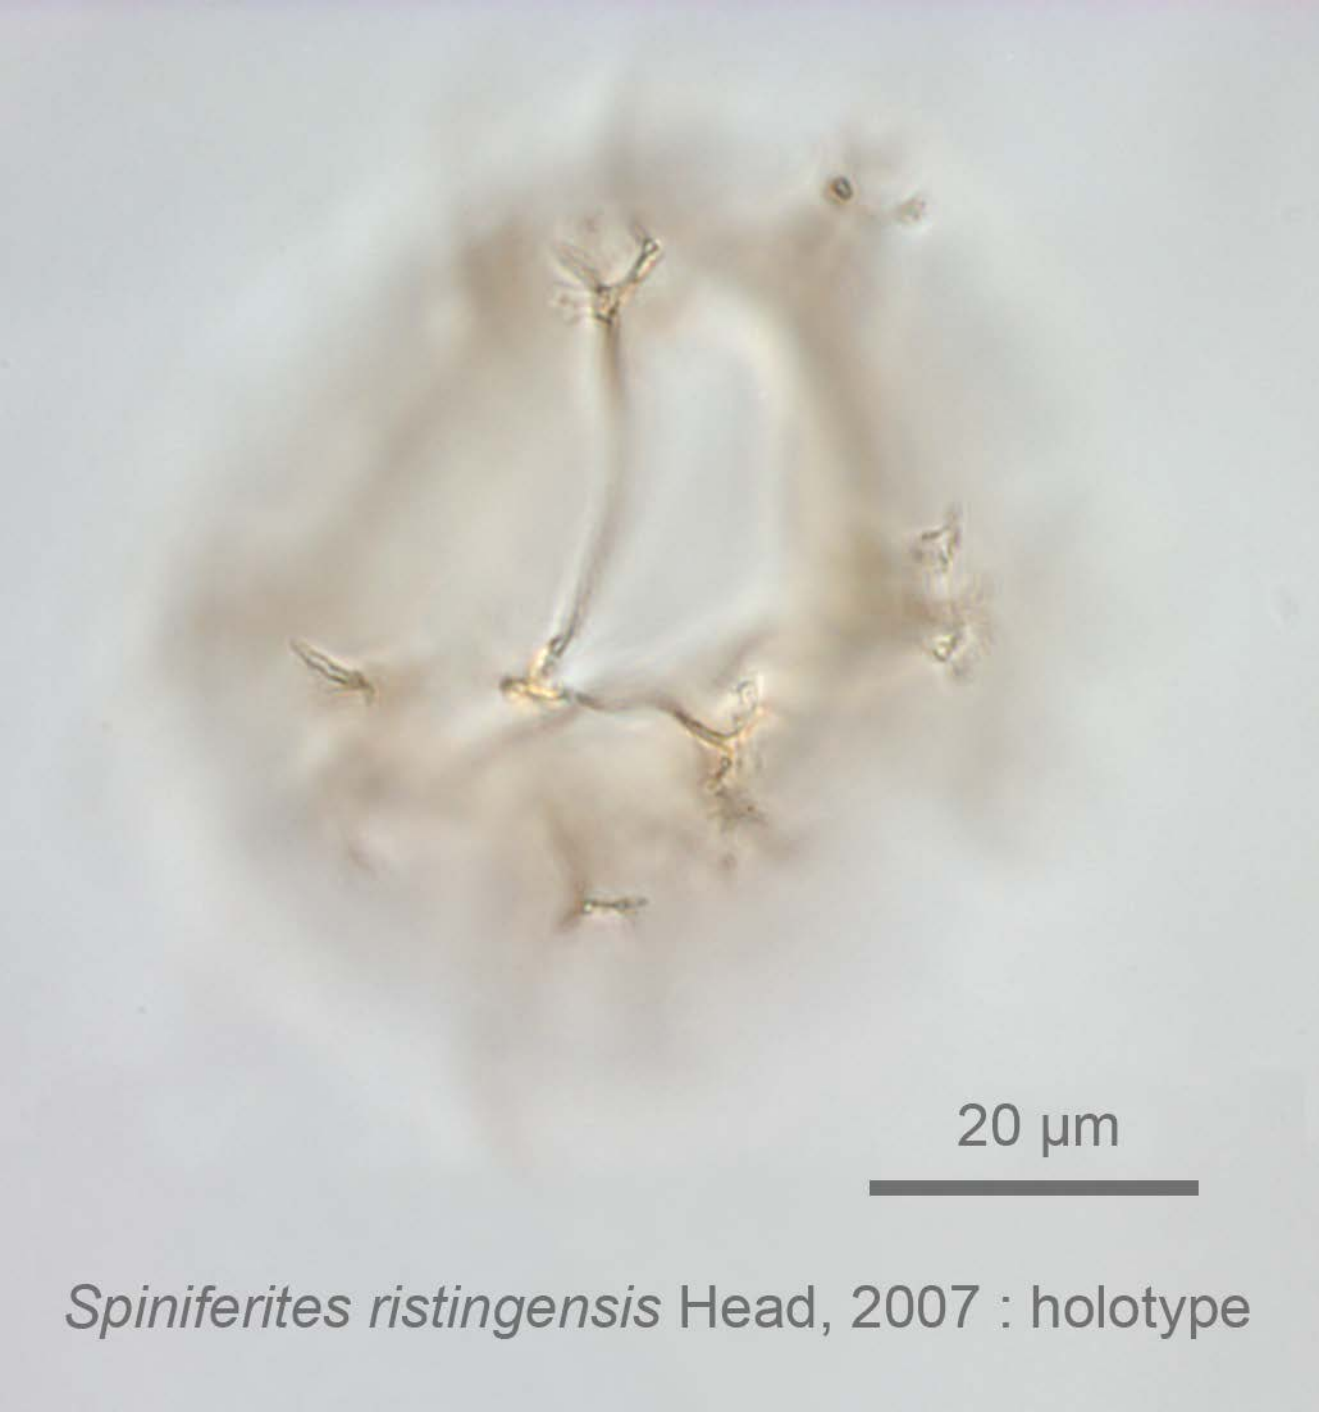

20 μm

*Spiniferites ristingensis* Head, 2007 : holotype

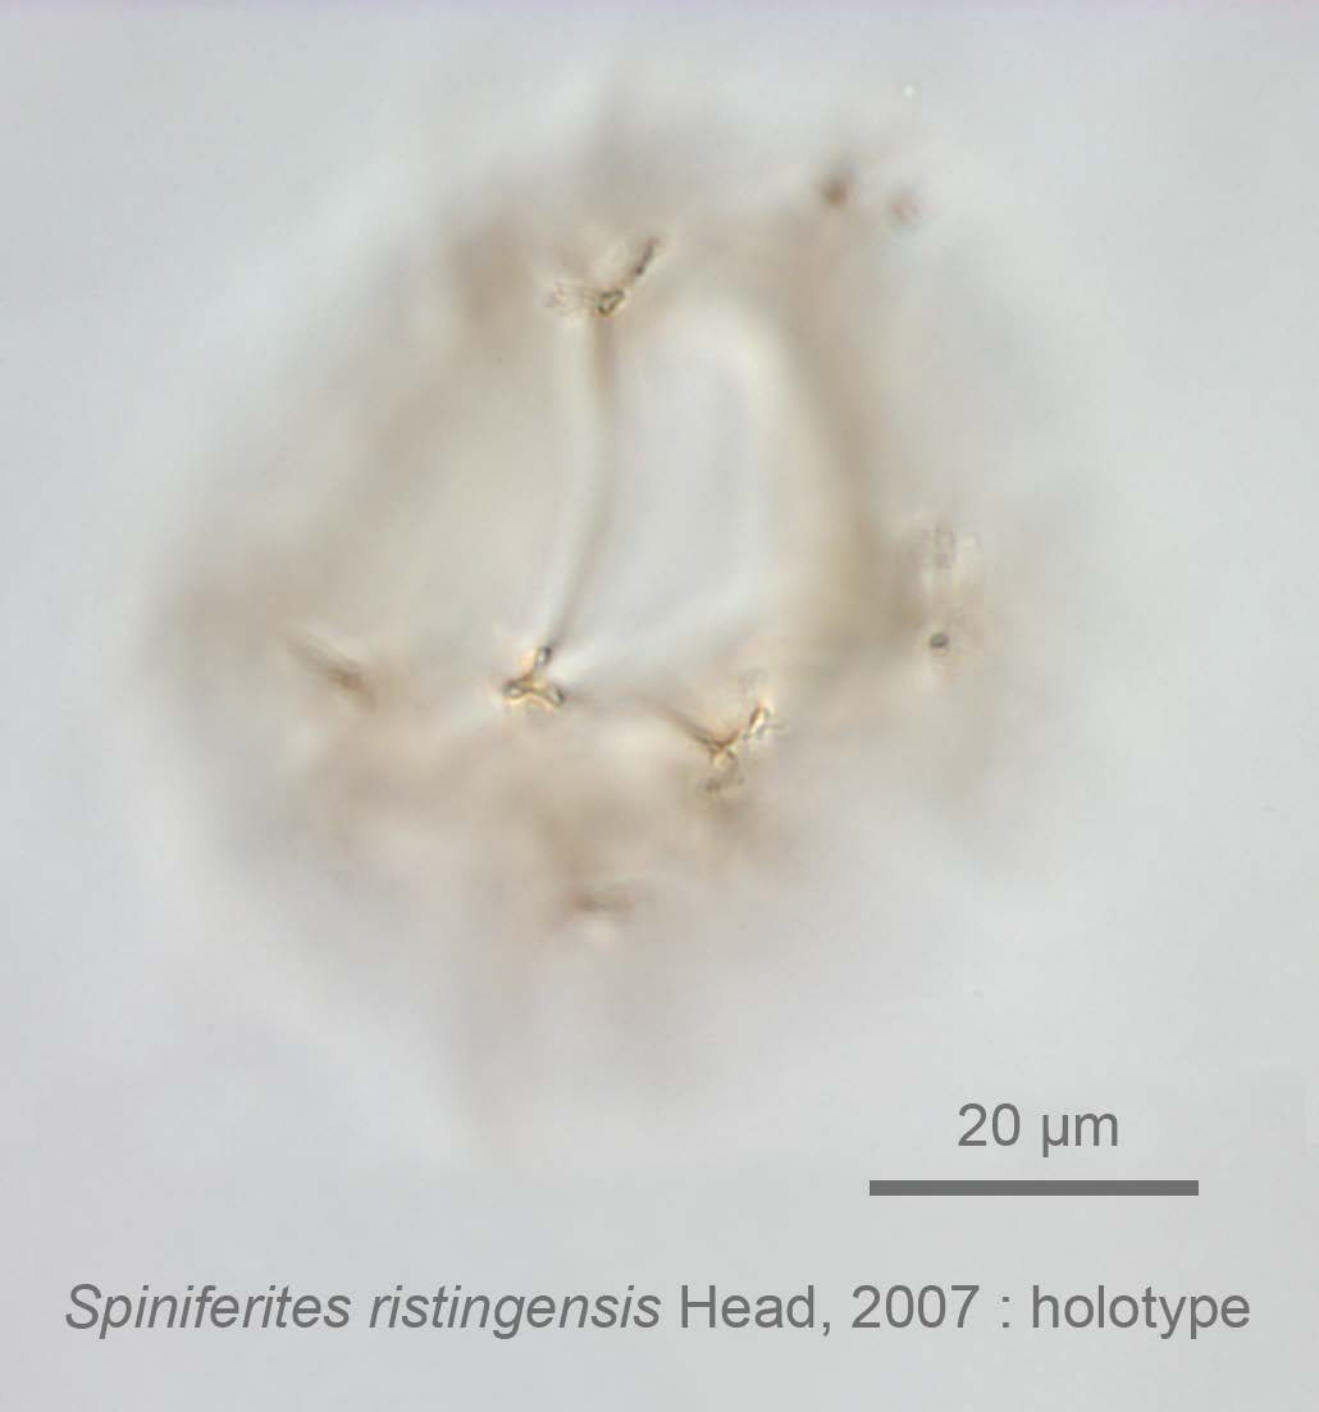

20 μm

*Spiniferites ristingensis* Head, 2007 : holotype

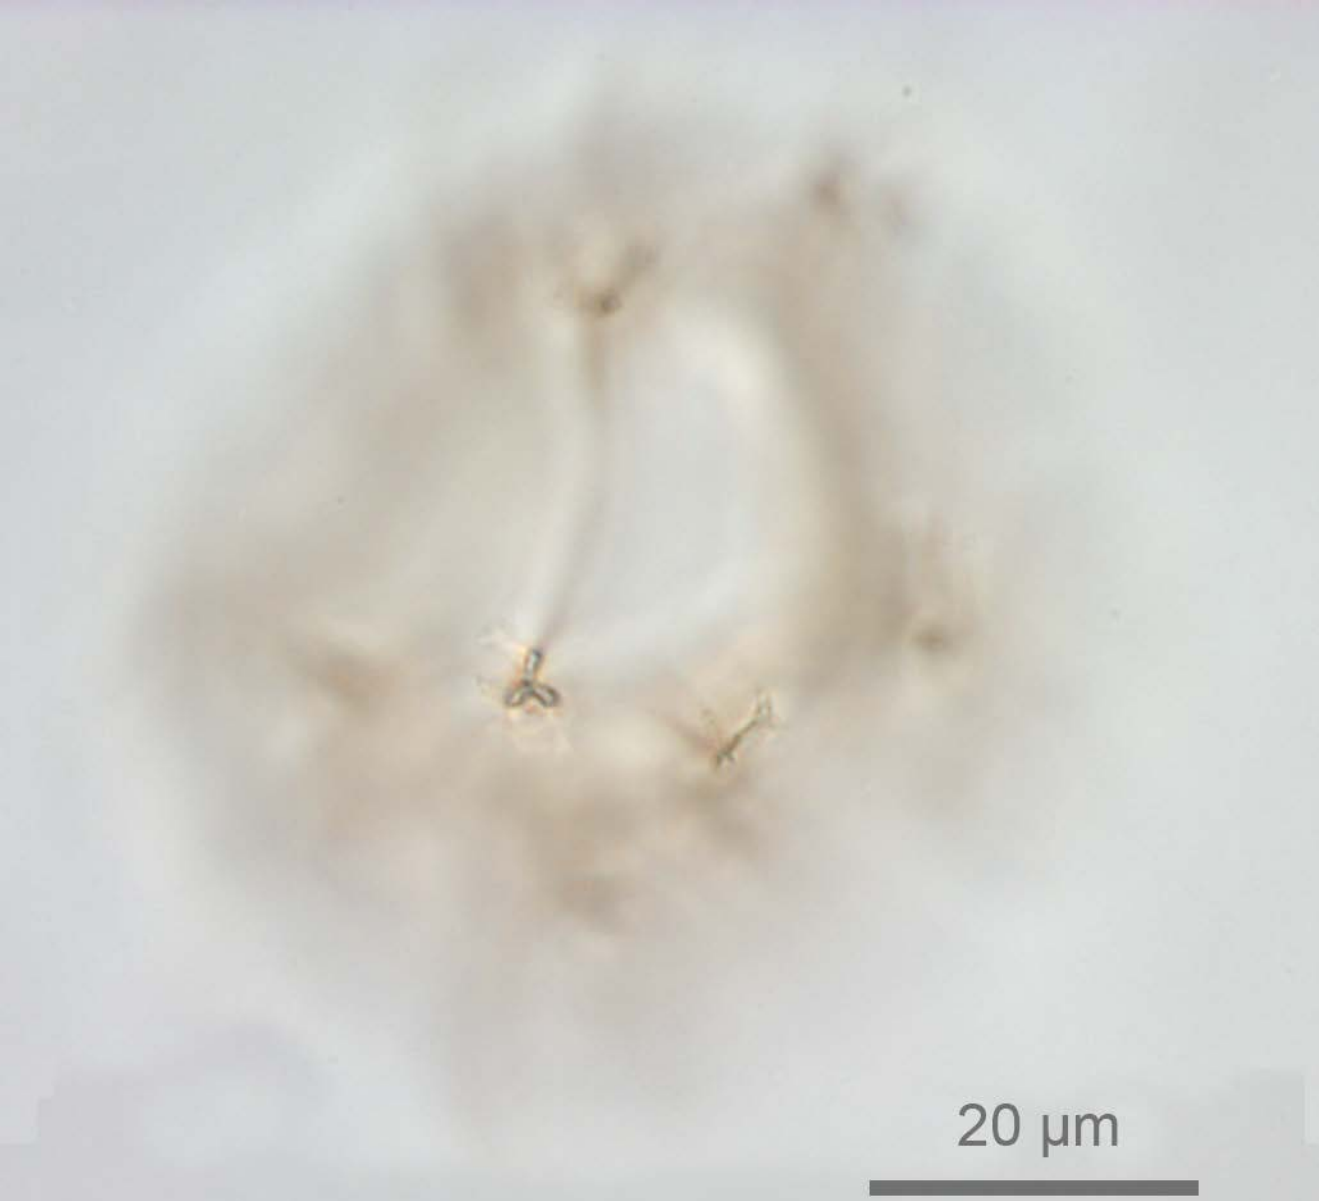

20  $\mu\text{m}$

*Spiniferites ristingensis* Head, 2007 : holotype

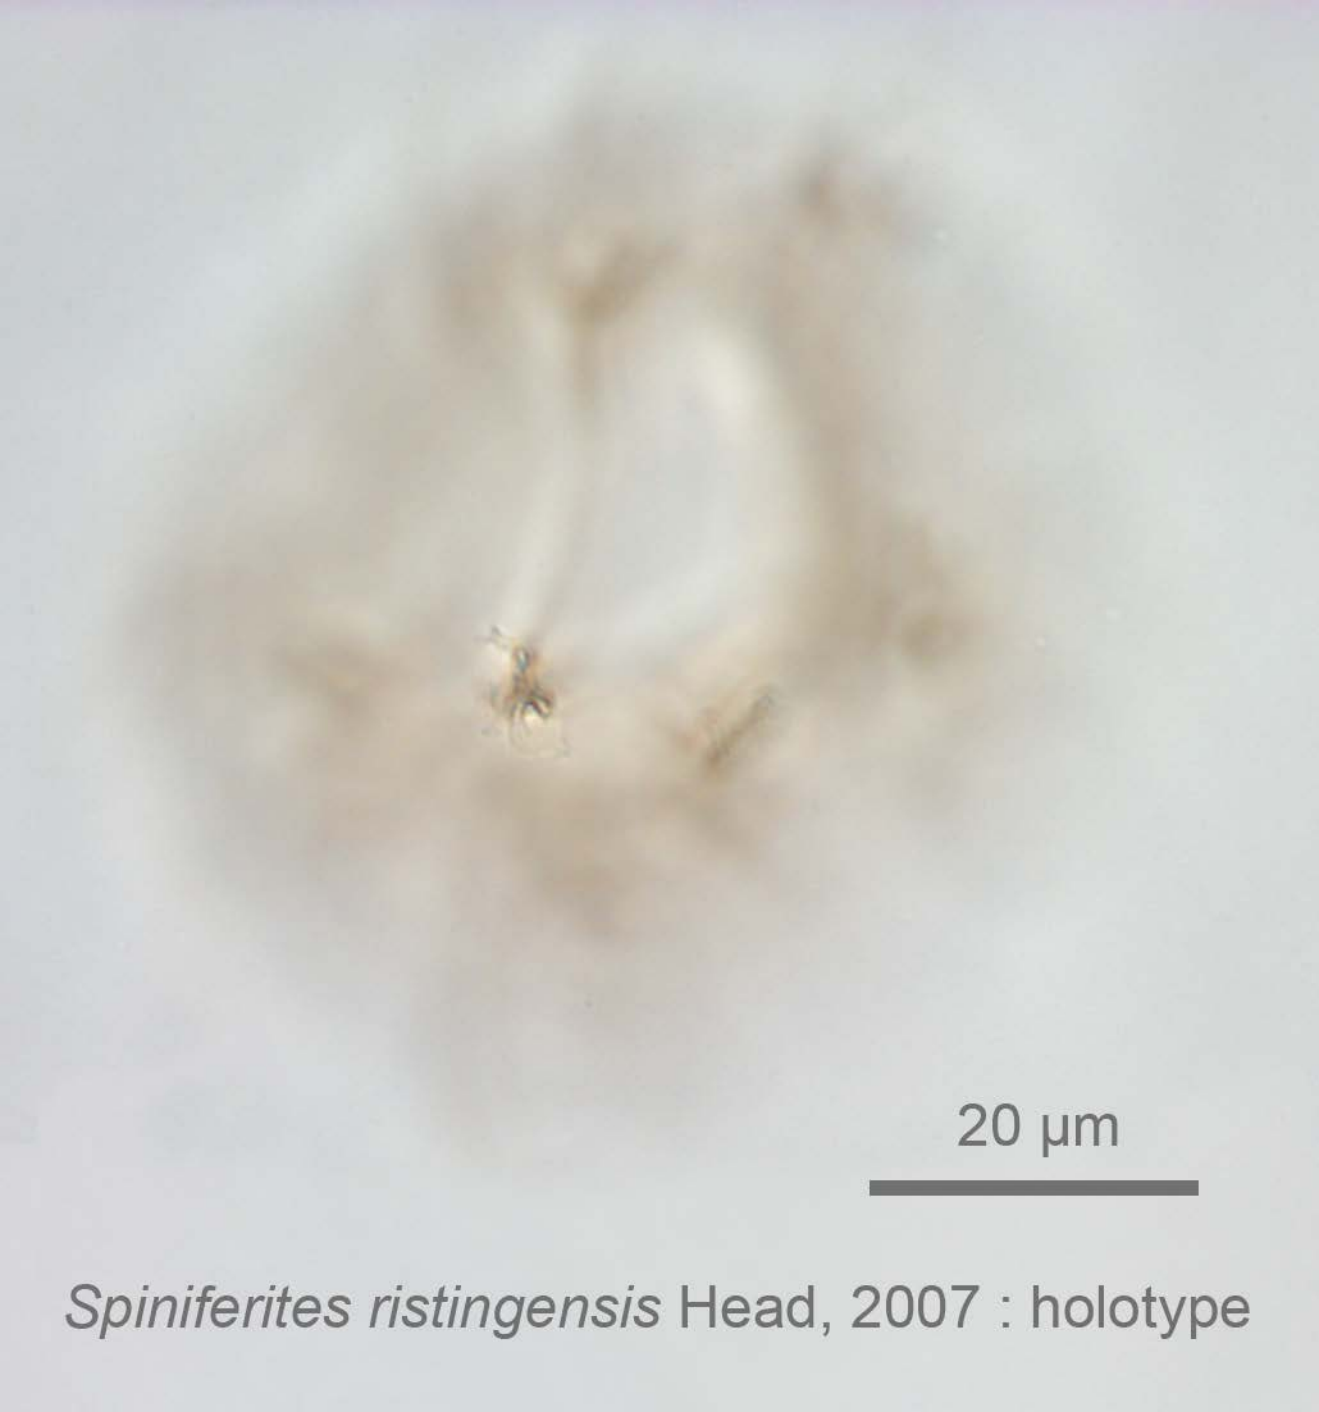

20  $\mu\text{m}$

*Spiniferites ristingensis* Head, 2007 : holotype

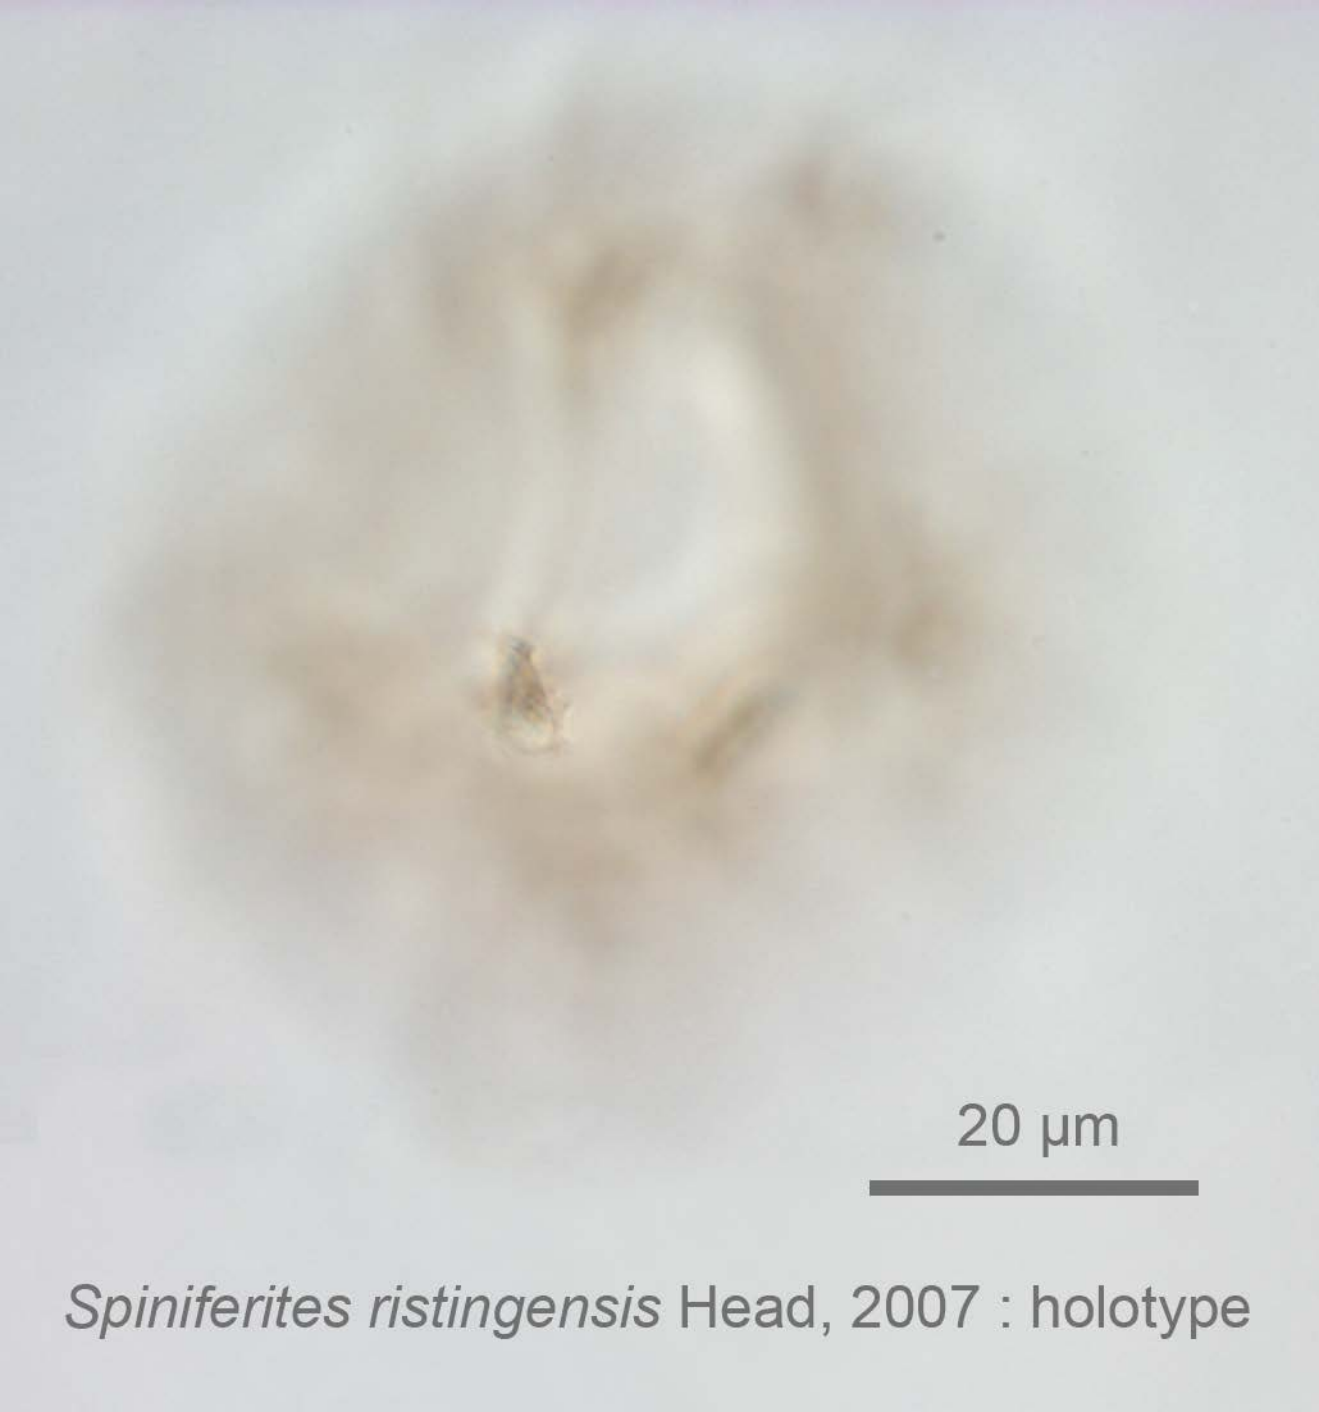

20  $\mu\text{m}$

*Spiniferites ristingensis* Head, 2007 : holotype
