# Supplementary material
Source: publisher figshare collection journal article supplement (https://tandf.figshare.com/articles/dataset/_/7466618)
Supplement: Supplementary file 17 [file 1]

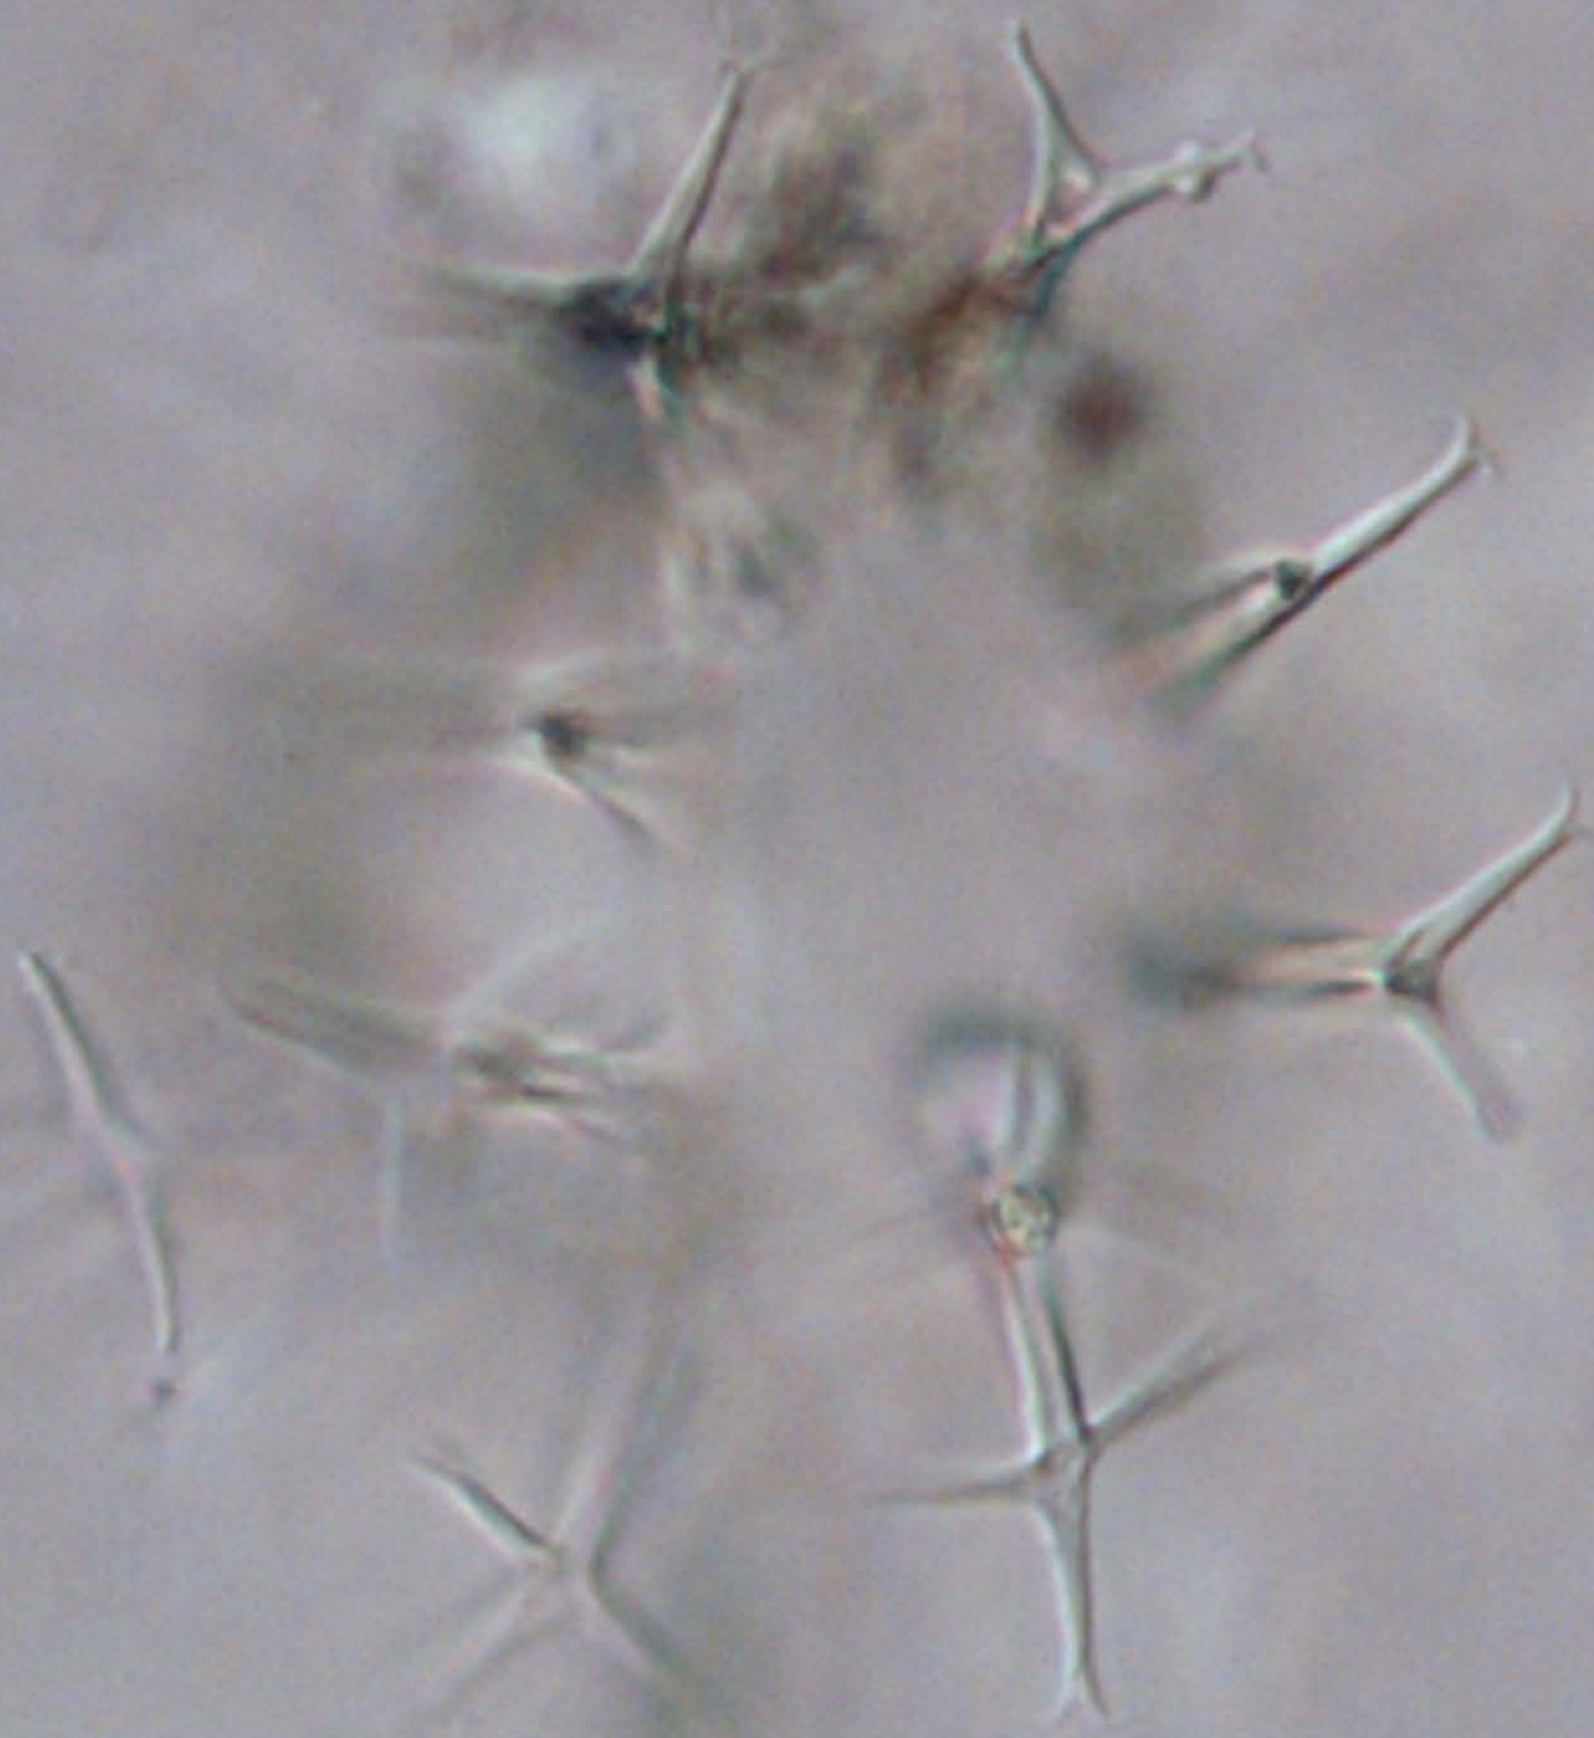

20  $\mu\text{m}$

"Spiniferites splendidus" Harland 1979 : holotype



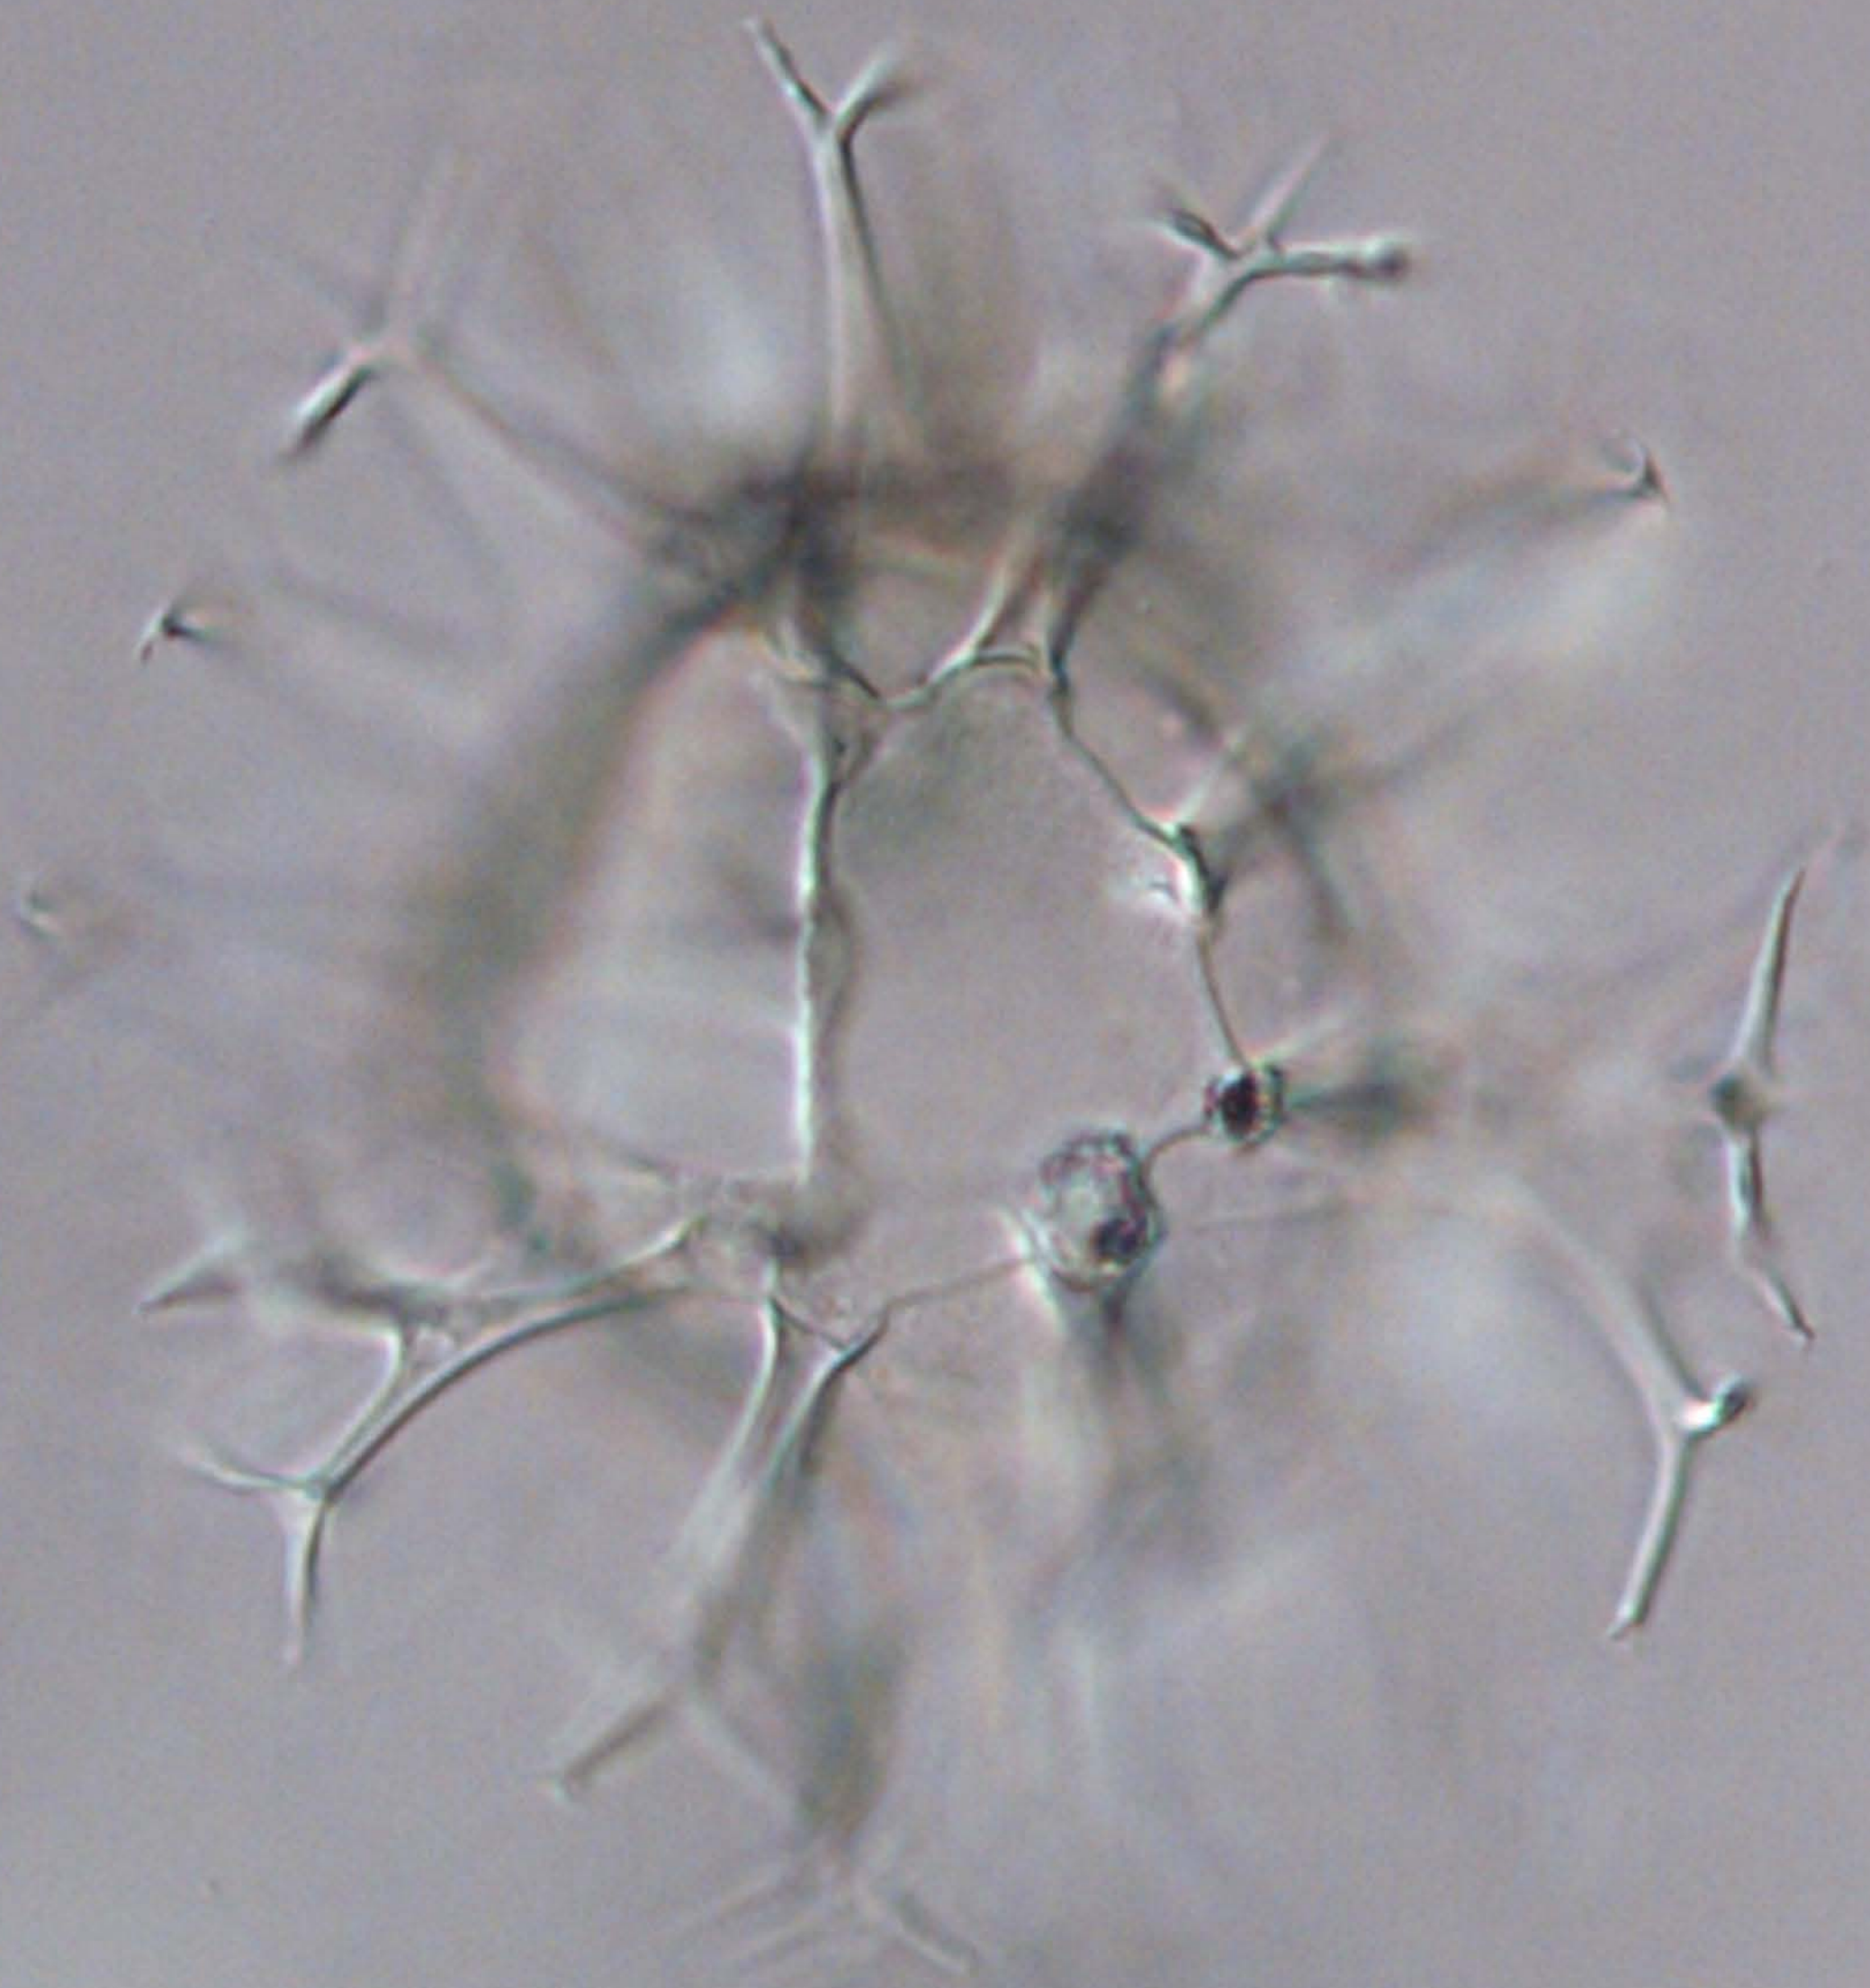

20  $\mu\text{m}$

"Spiniferites splendidus" Harland 1979 : holotype



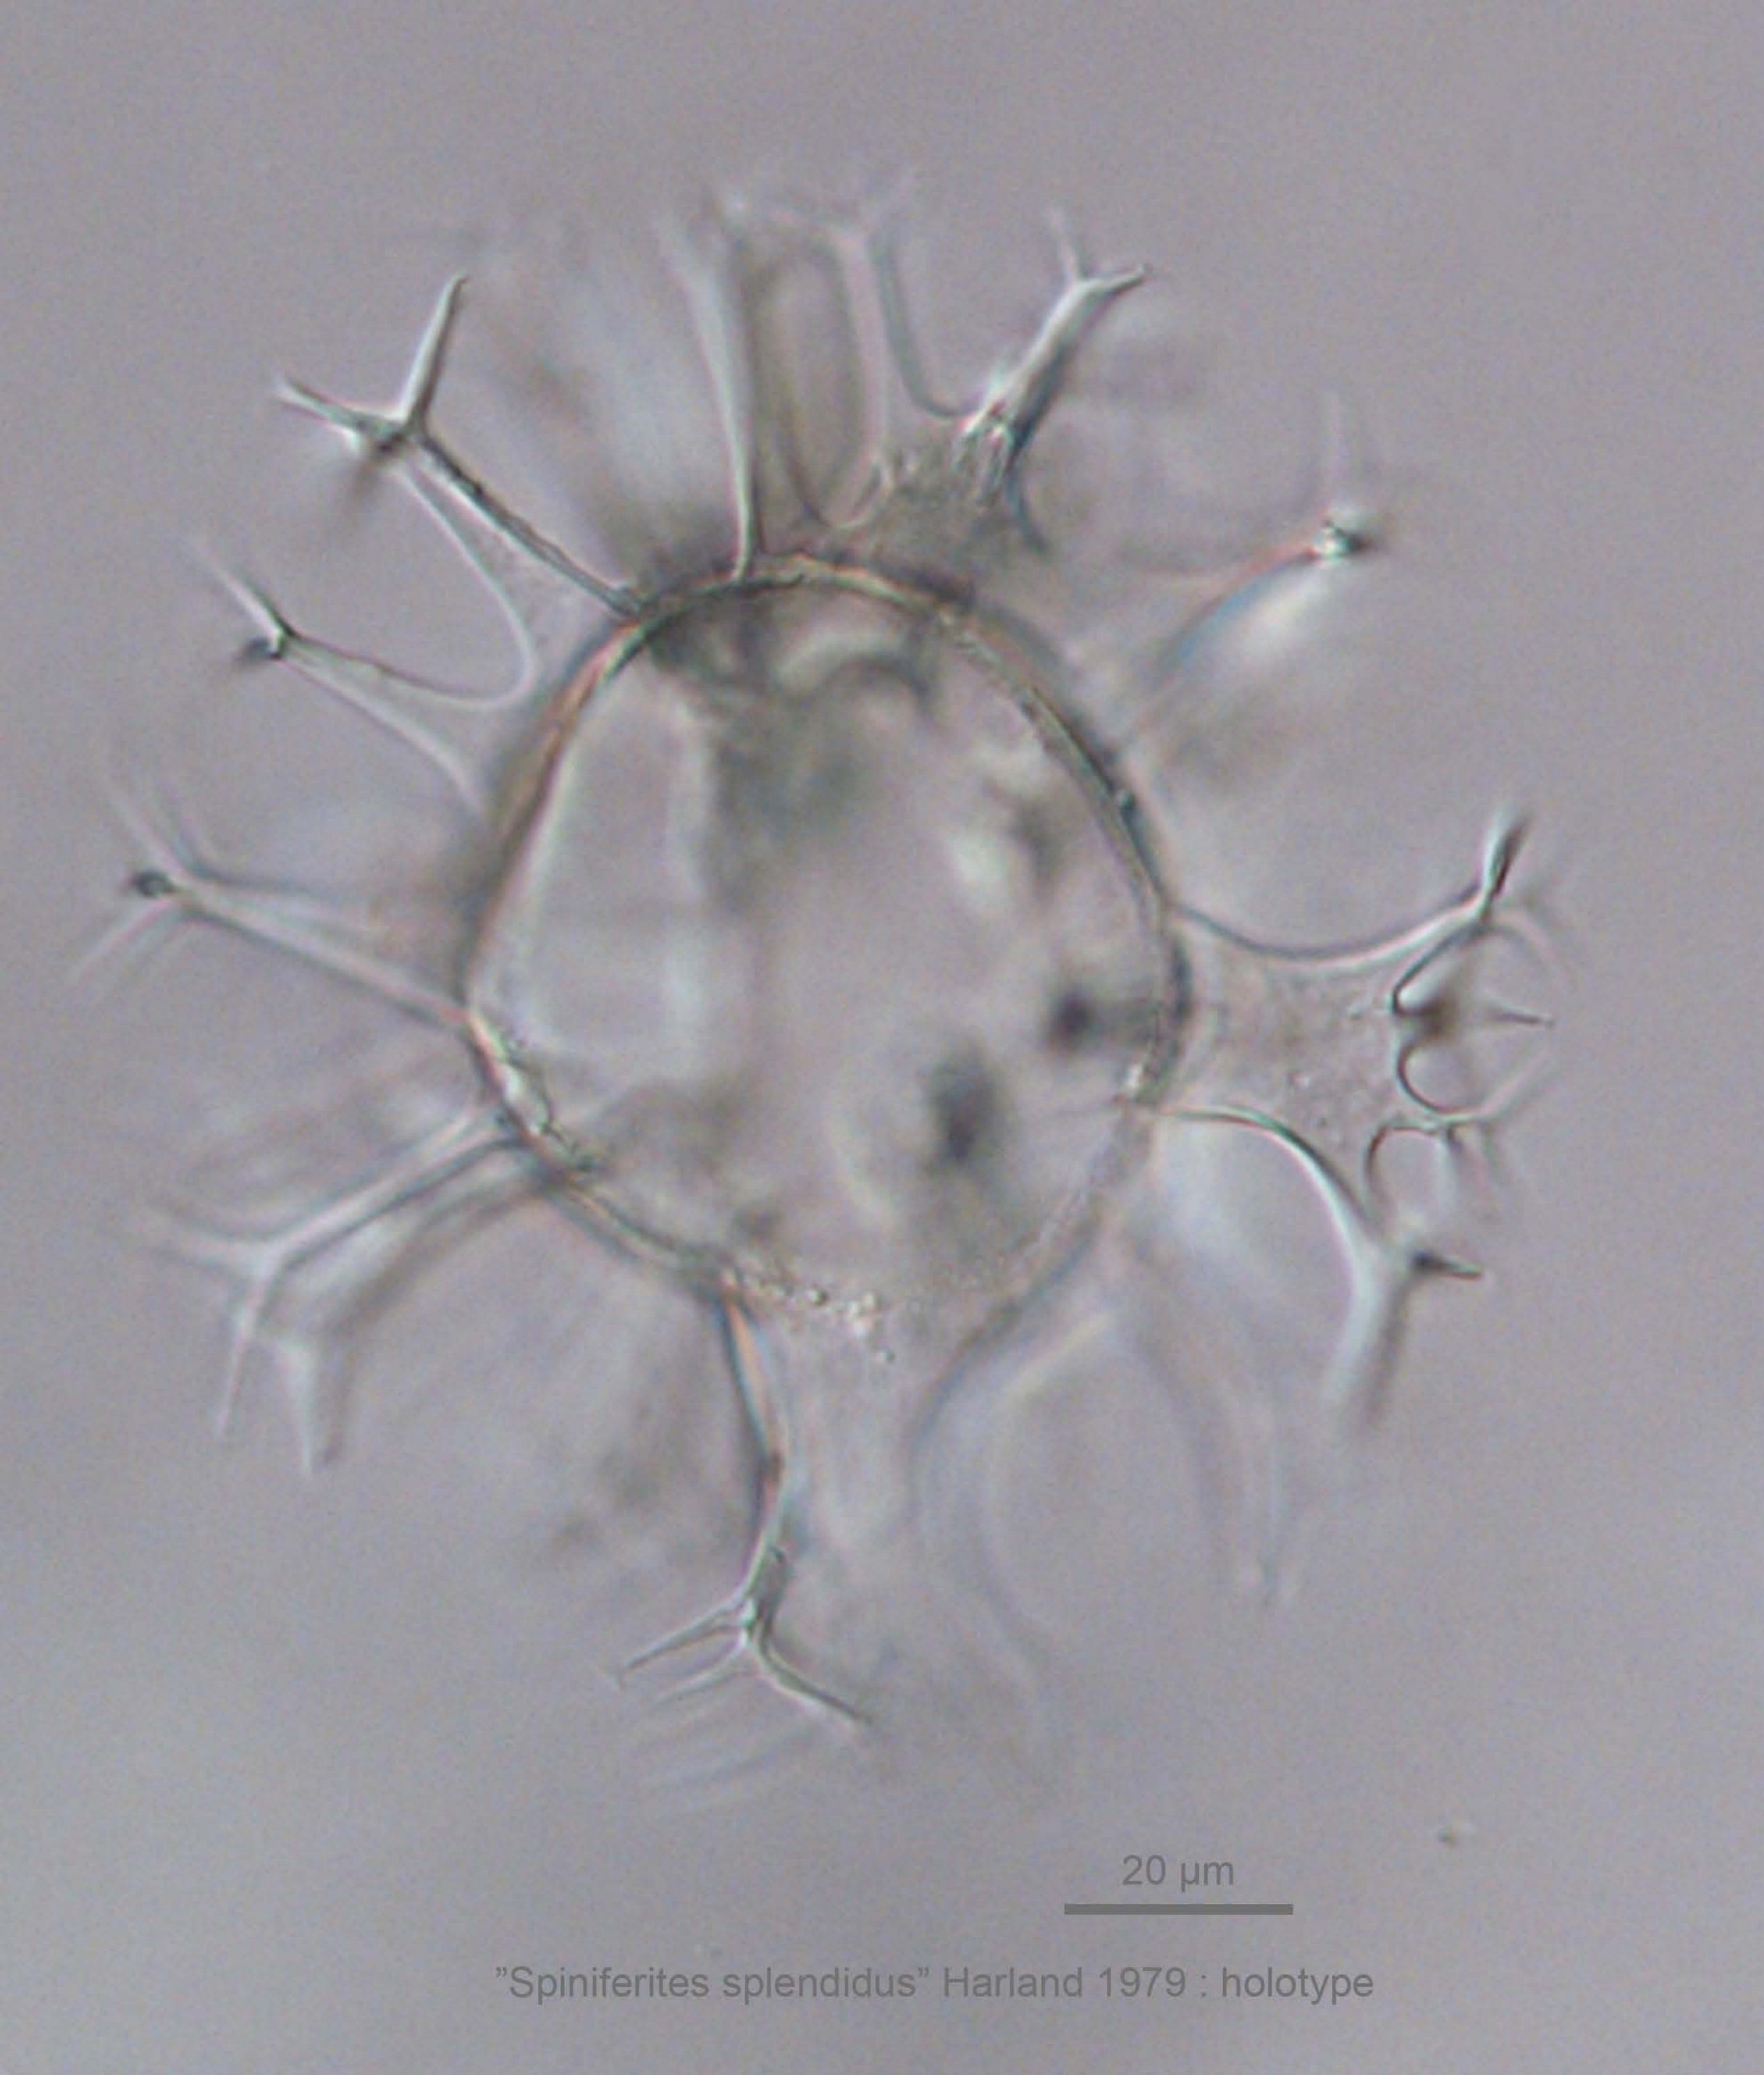

20  $\mu\text{m}$

"Spiniferites splendidus" Harland 1979 : holotype



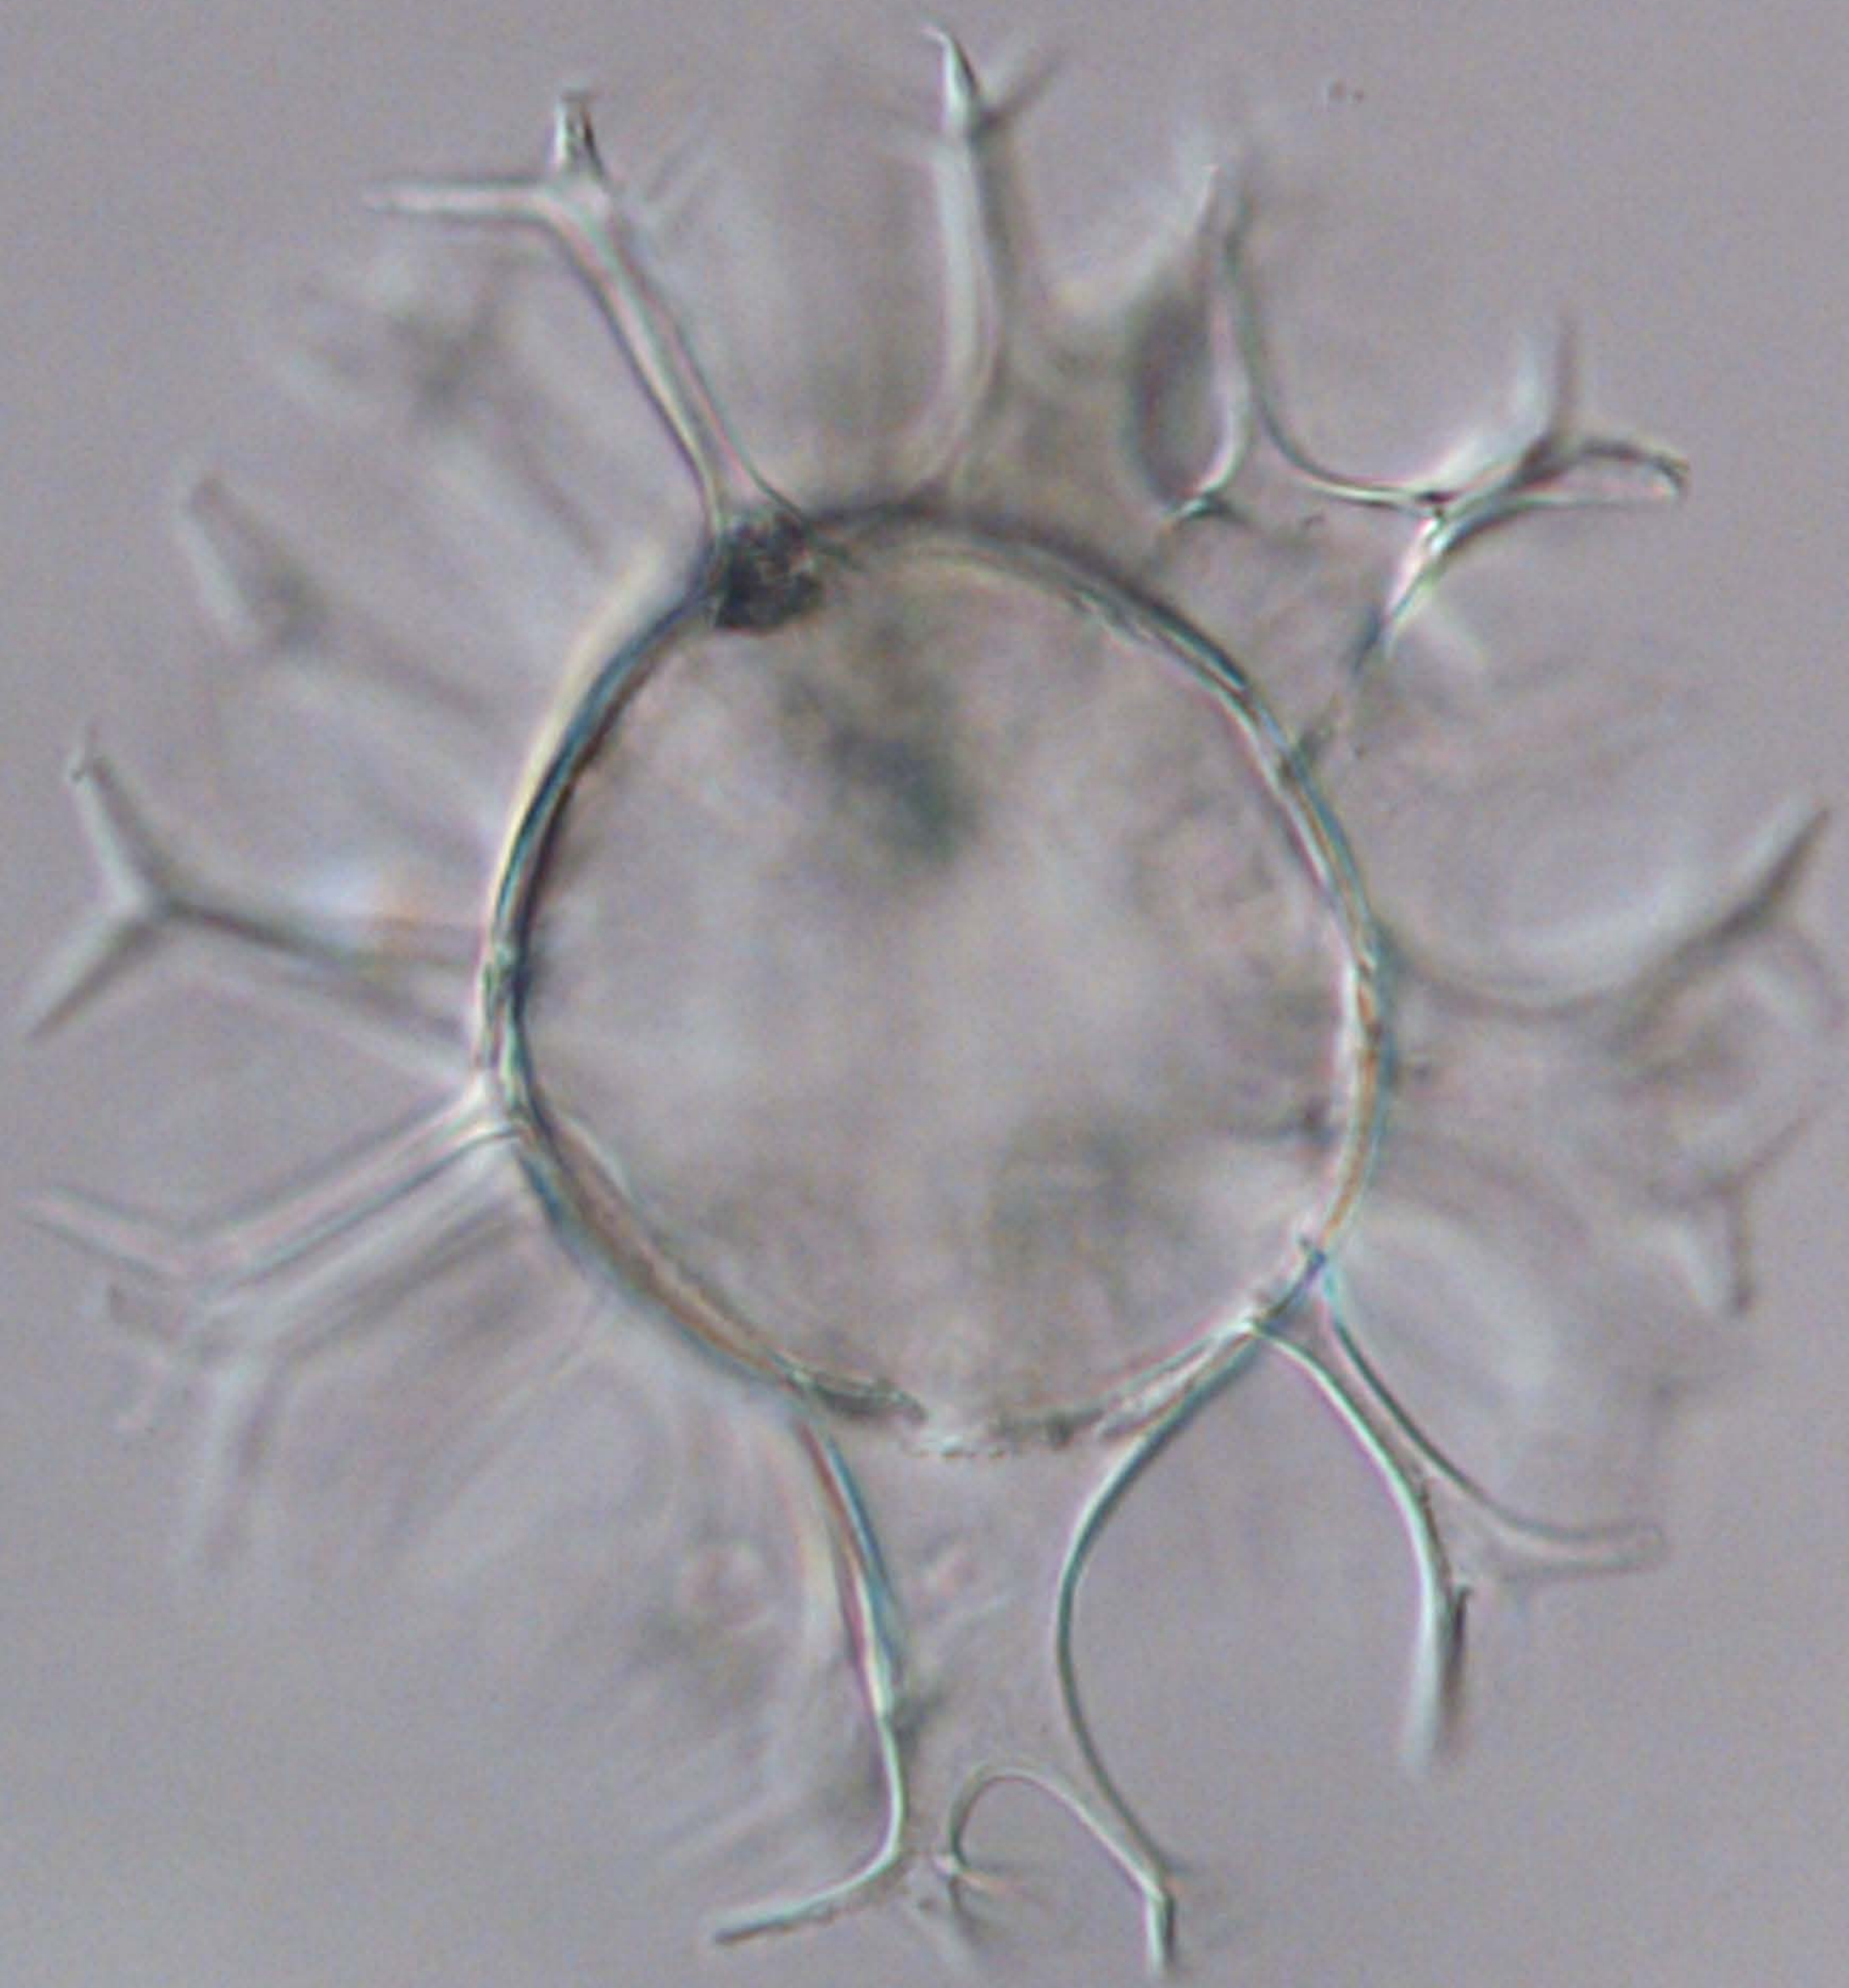

20  $\mu\text{m}$

"Spiniferites splendidus" Harland 1979 : holotype



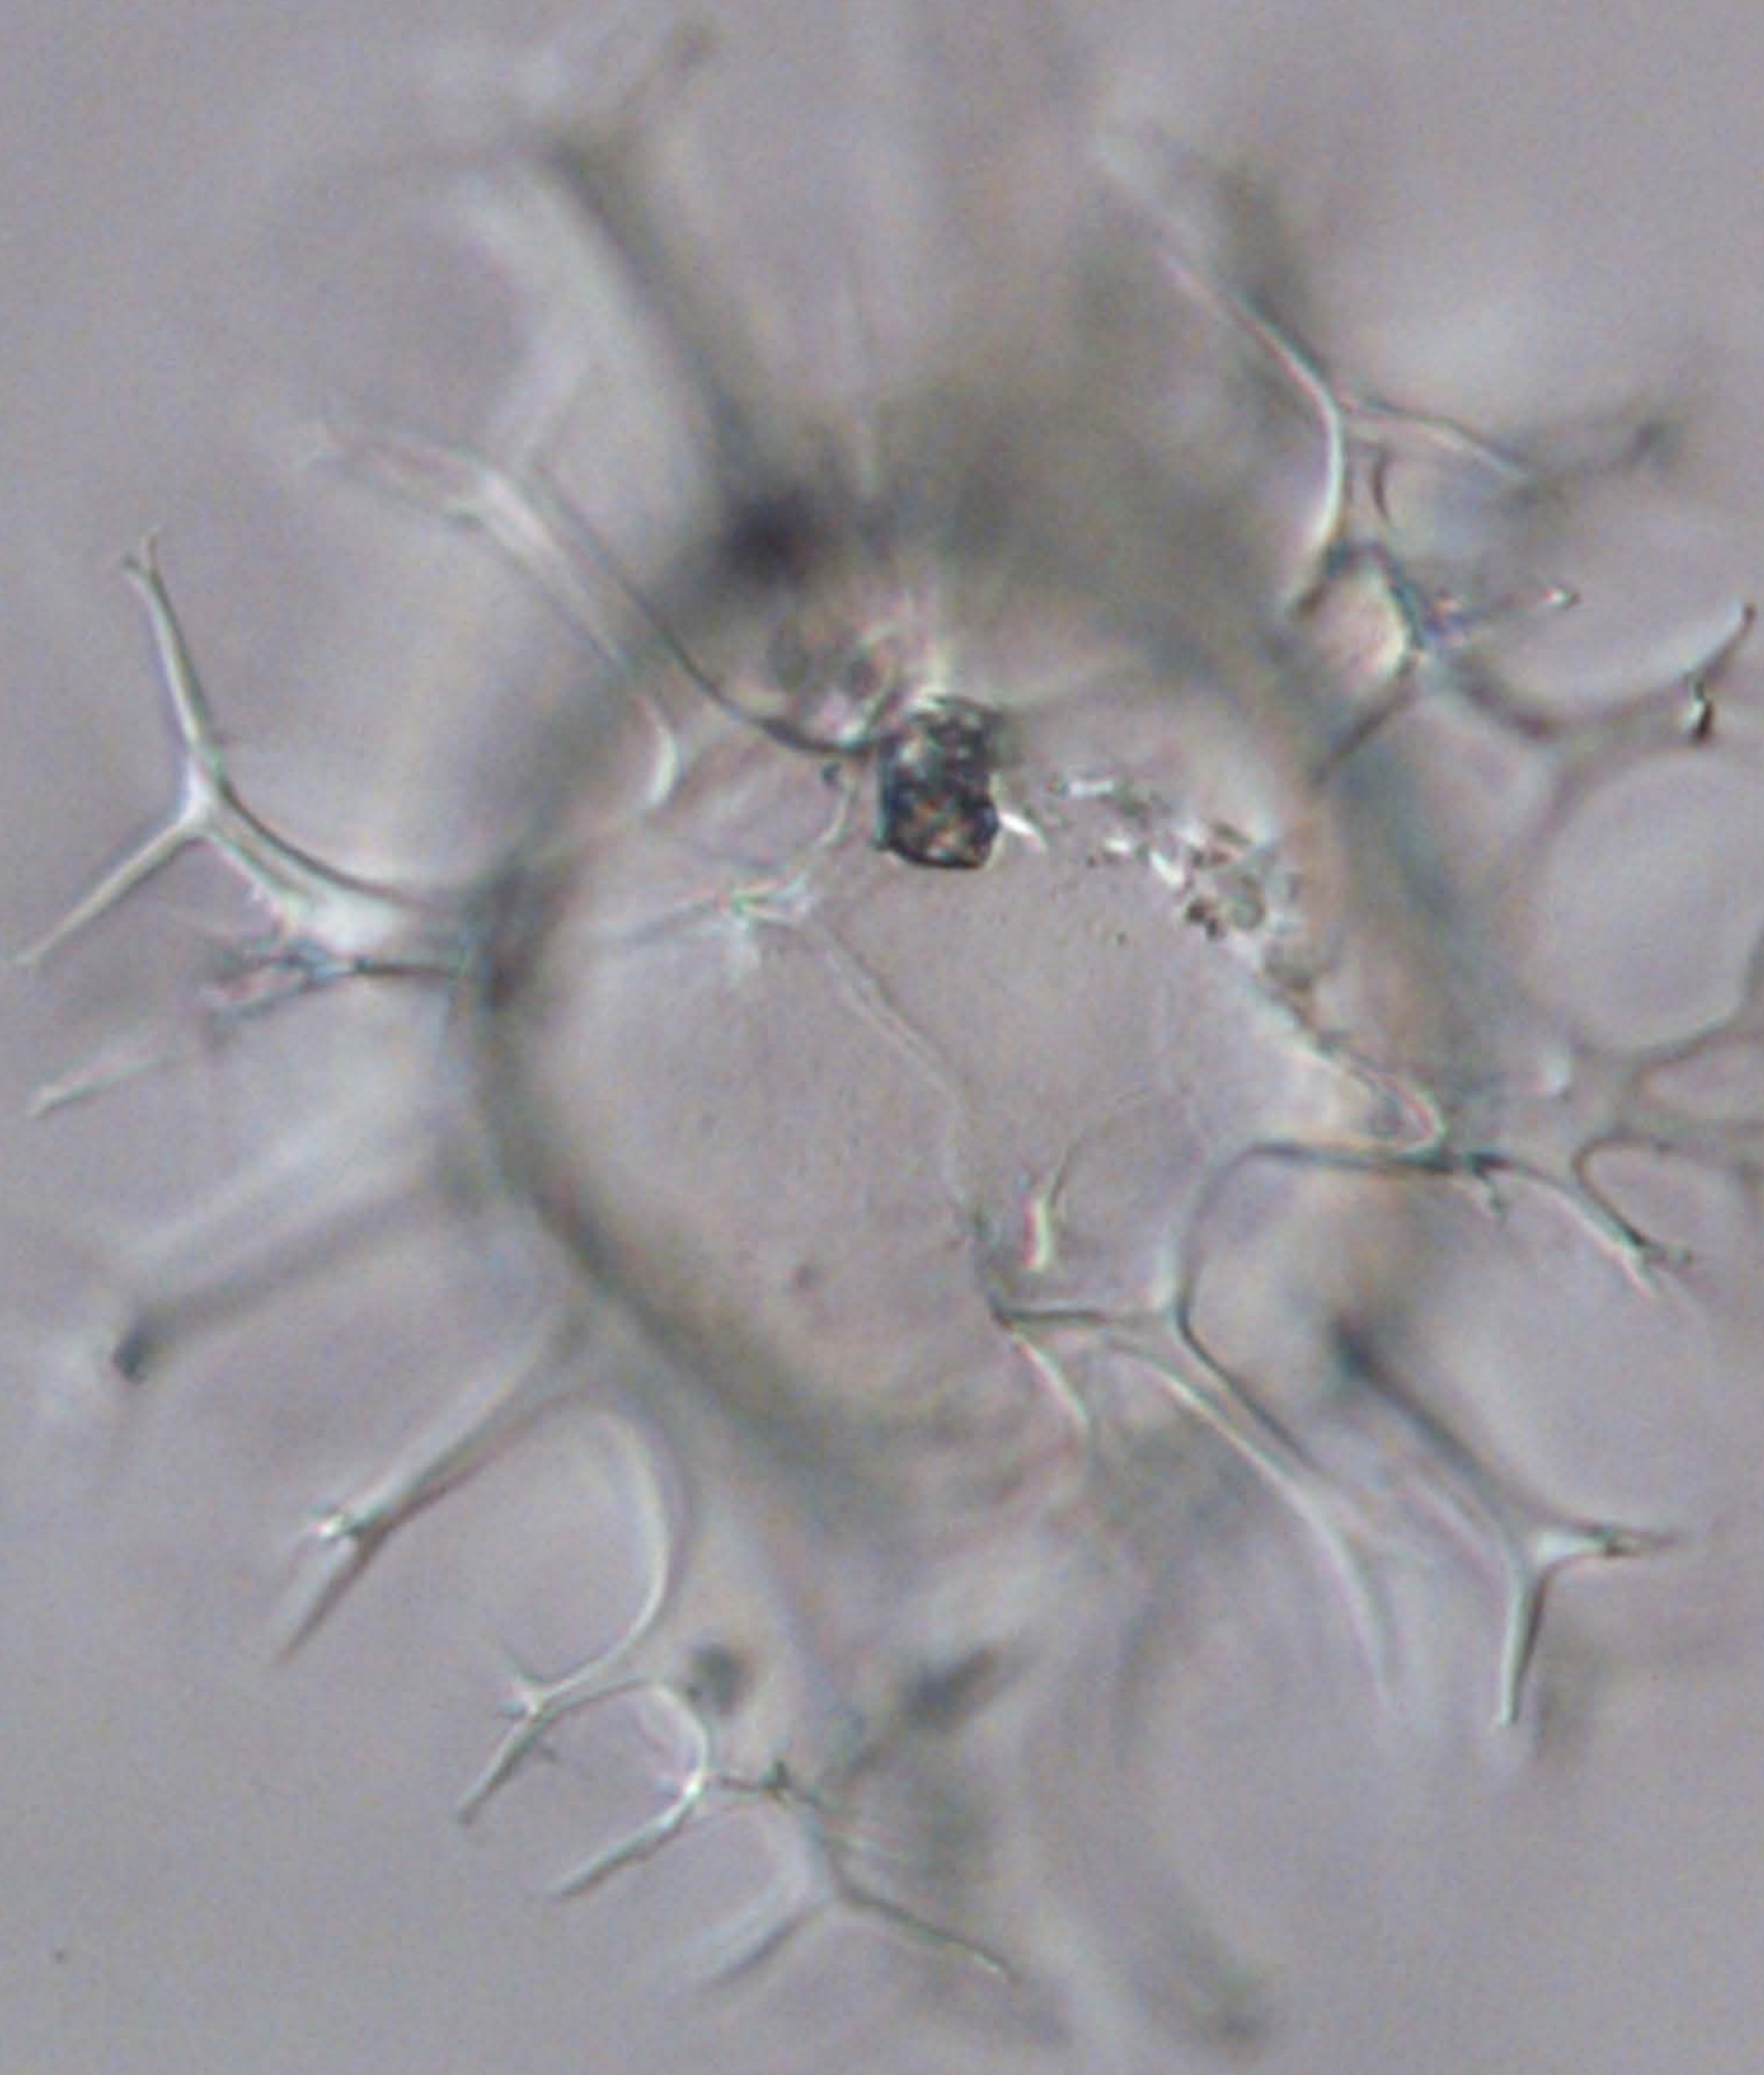

20  $\mu\text{m}$

"Spiniferites splendidus" Harland 1979 : holotype



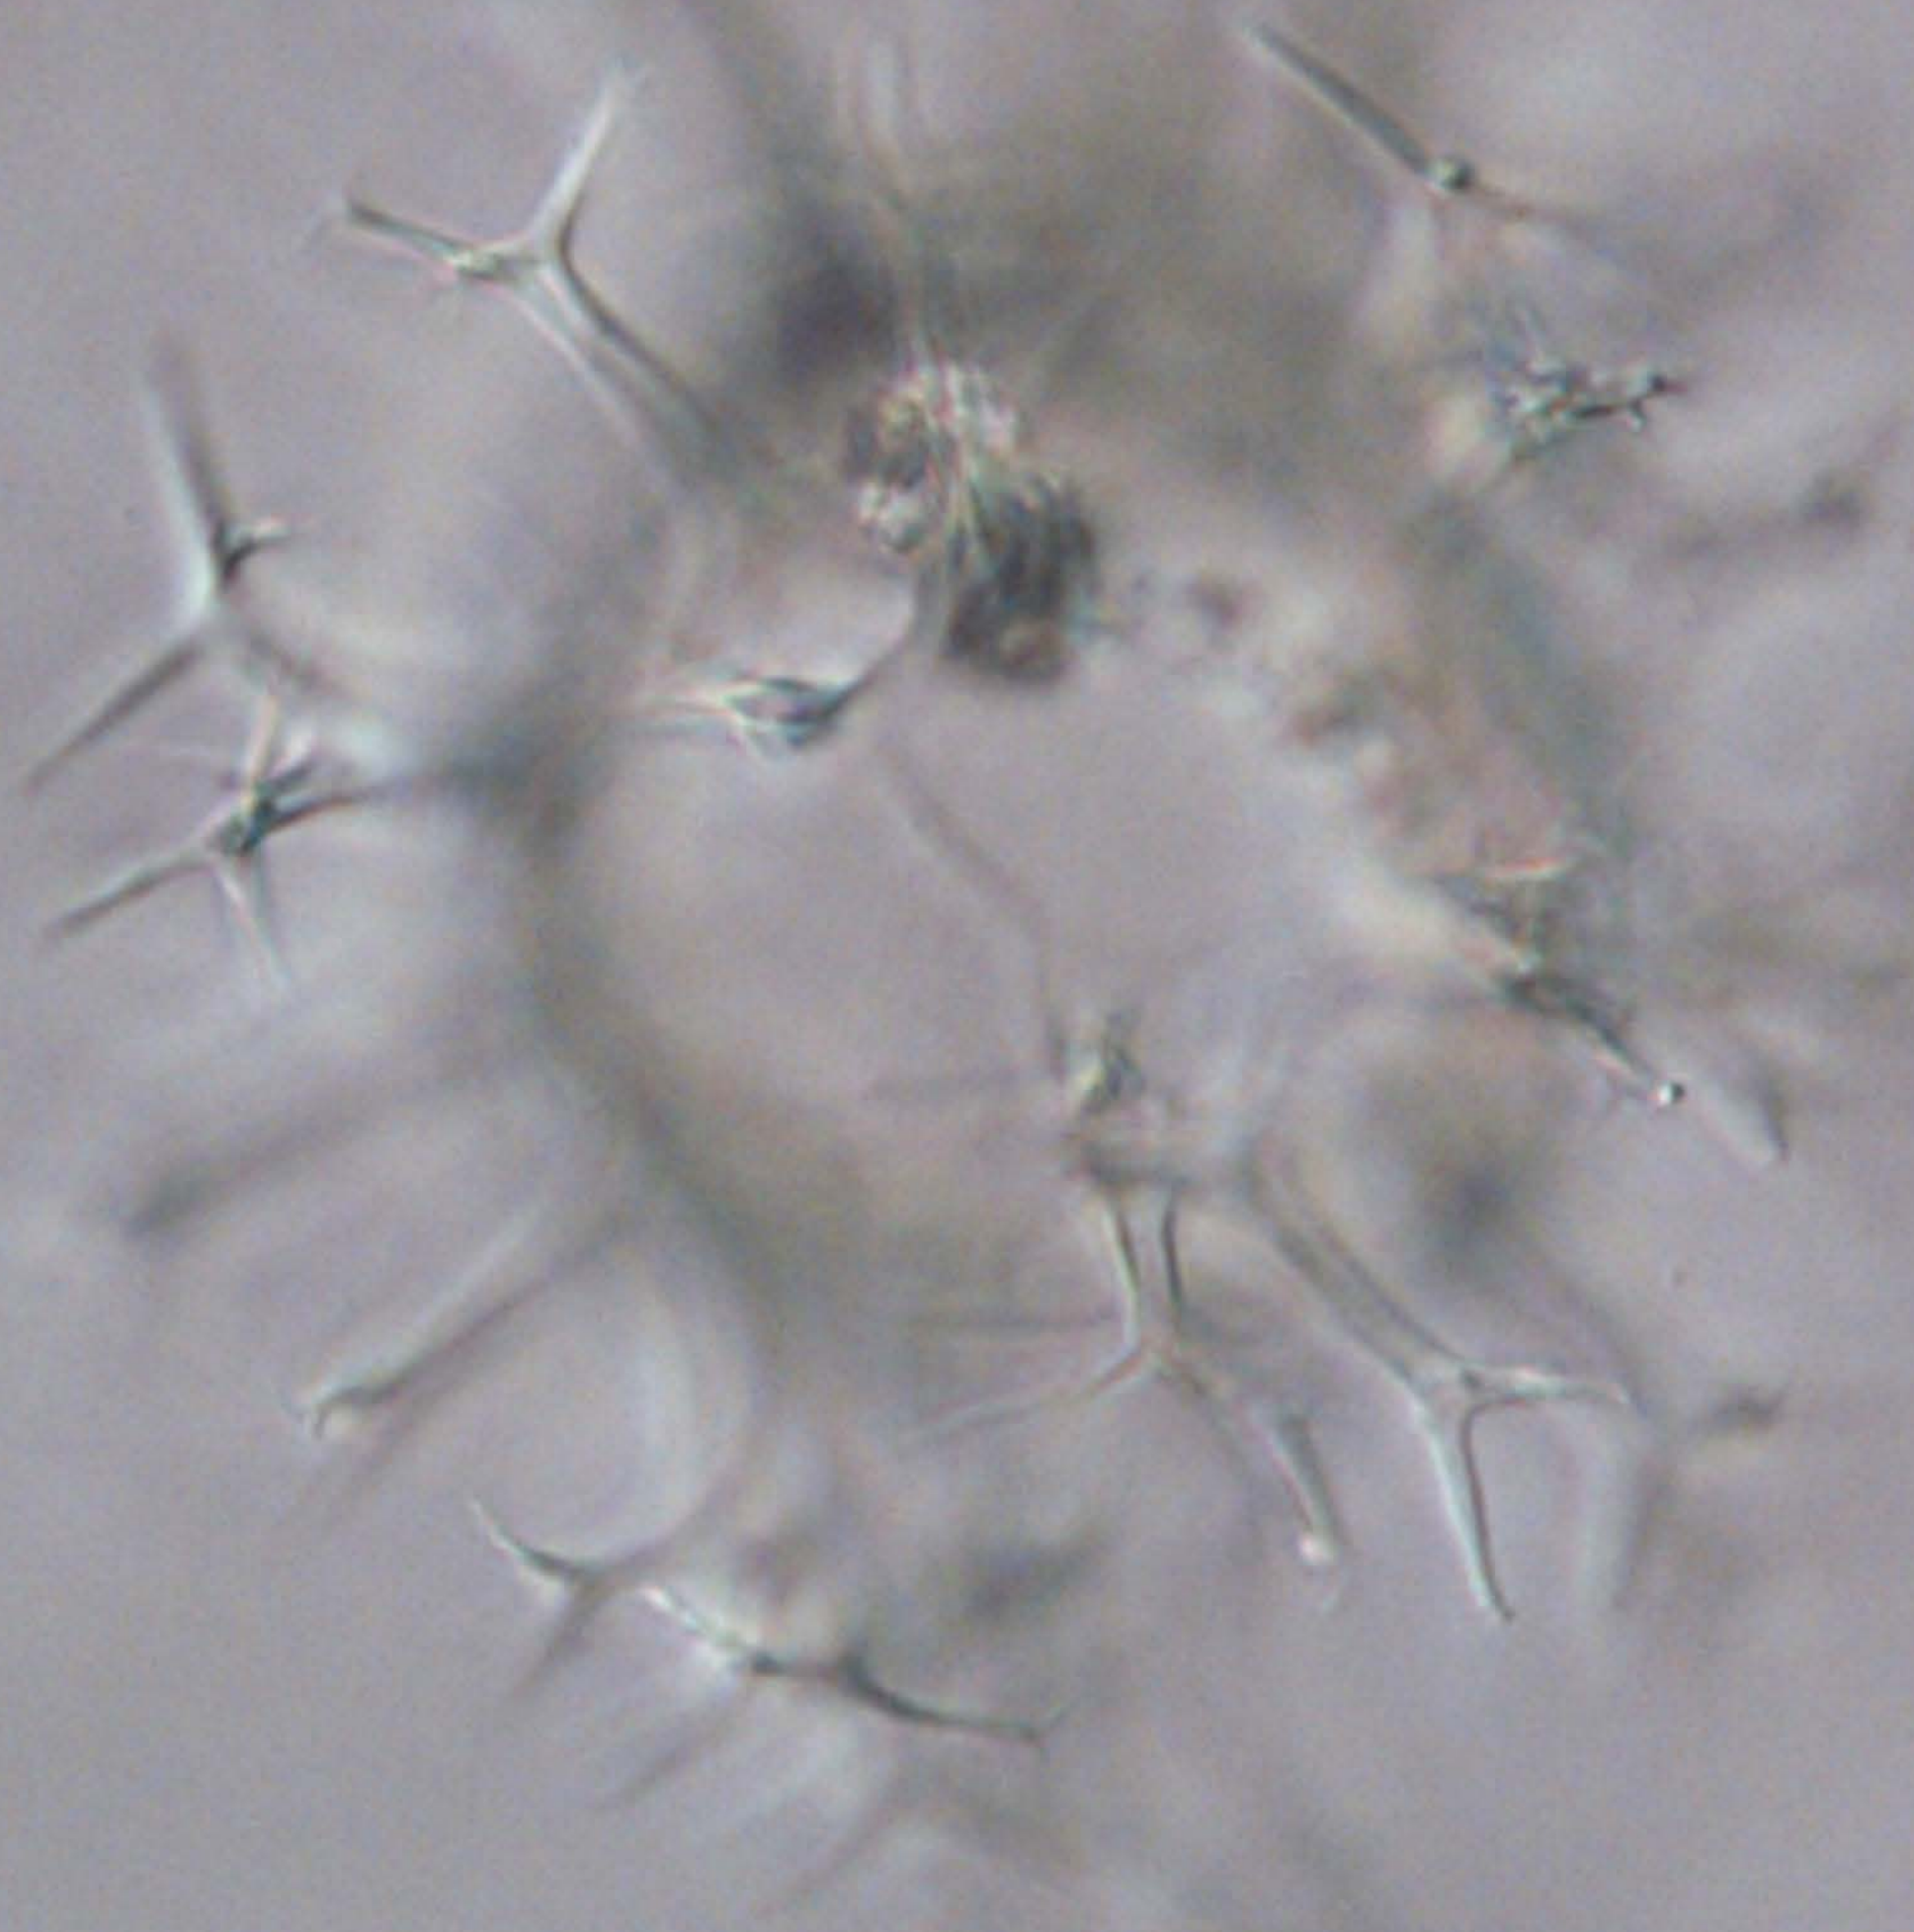

20  $\mu\text{m}$

"*Spiniferites splendidus*" Harland 1979 : holotype
