# Supplementary material
Source: publisher figshare collection journal article supplement (https://tandf.figshare.com/articles/dataset/_/7466618)
Supplement: Supplementary file 19 [file 1]

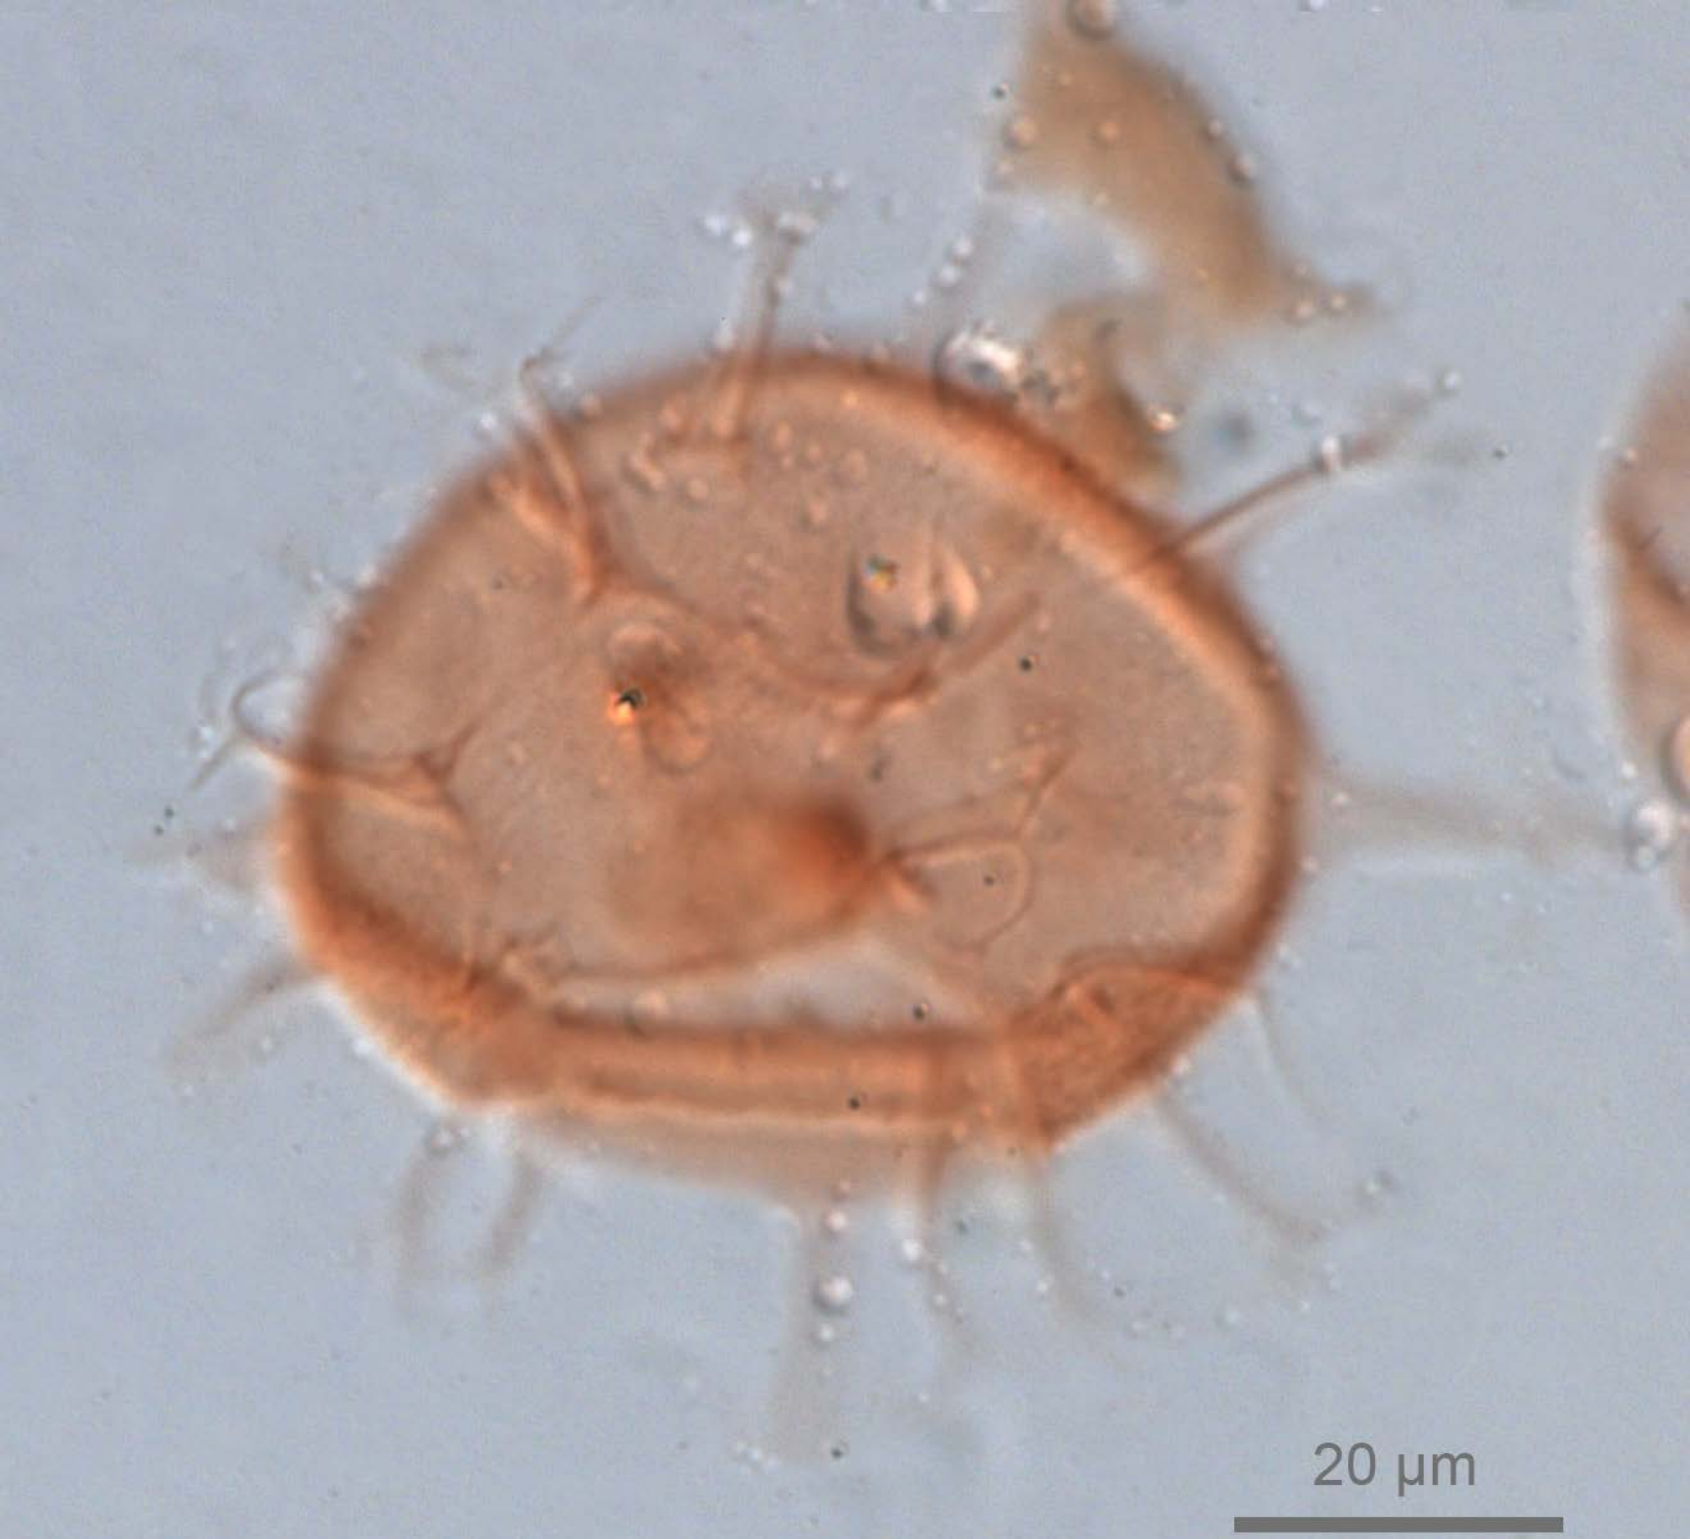

*Achomosphaera callosa* Matsuoka 1983 : holotype

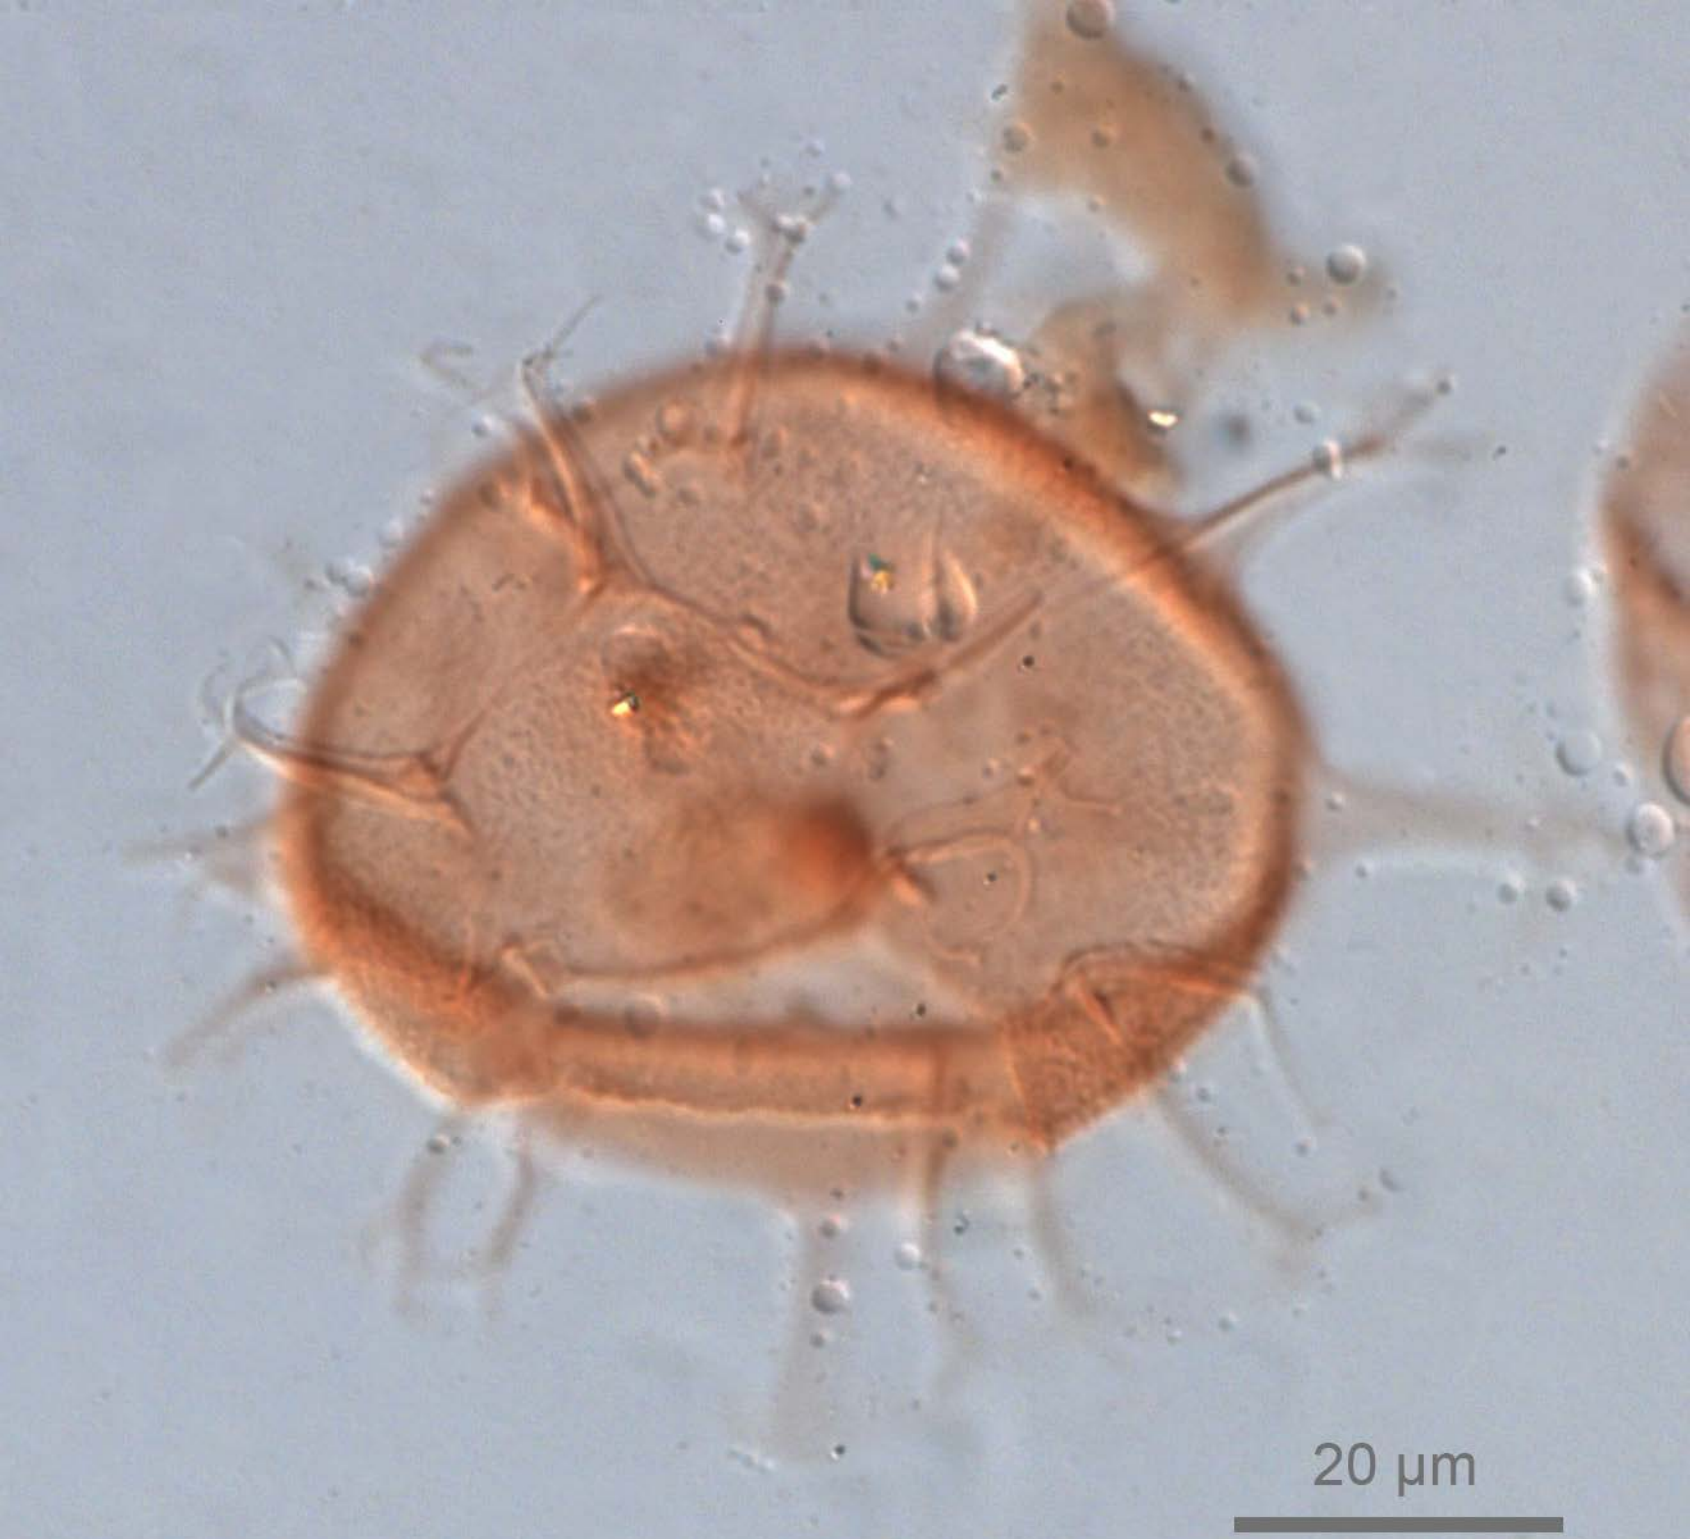

*Achomosphaera callosa* Matsuoka 1983 : holotype



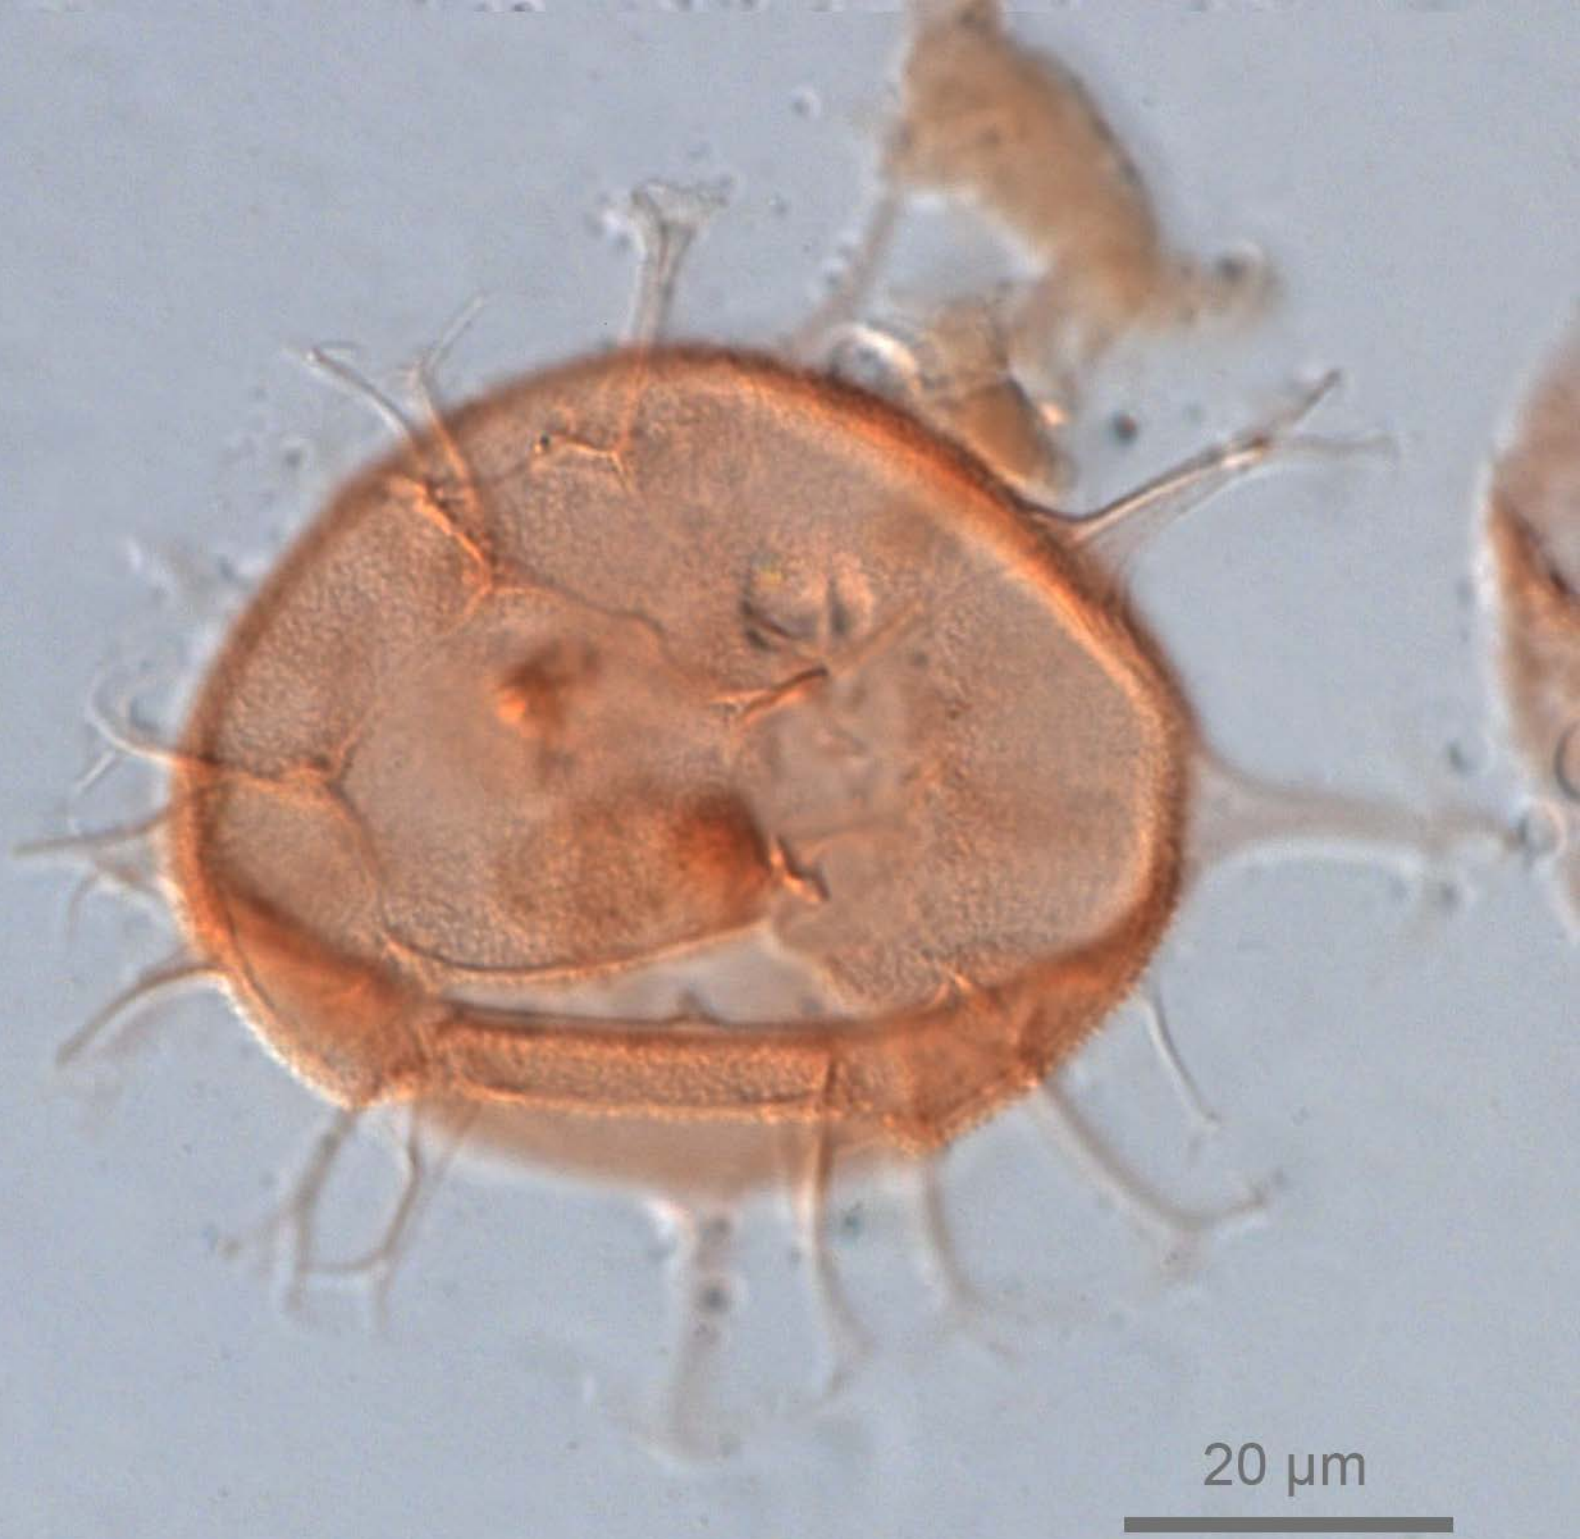

*Achomosphaera callosa* Matsuoka 1983 : holotype

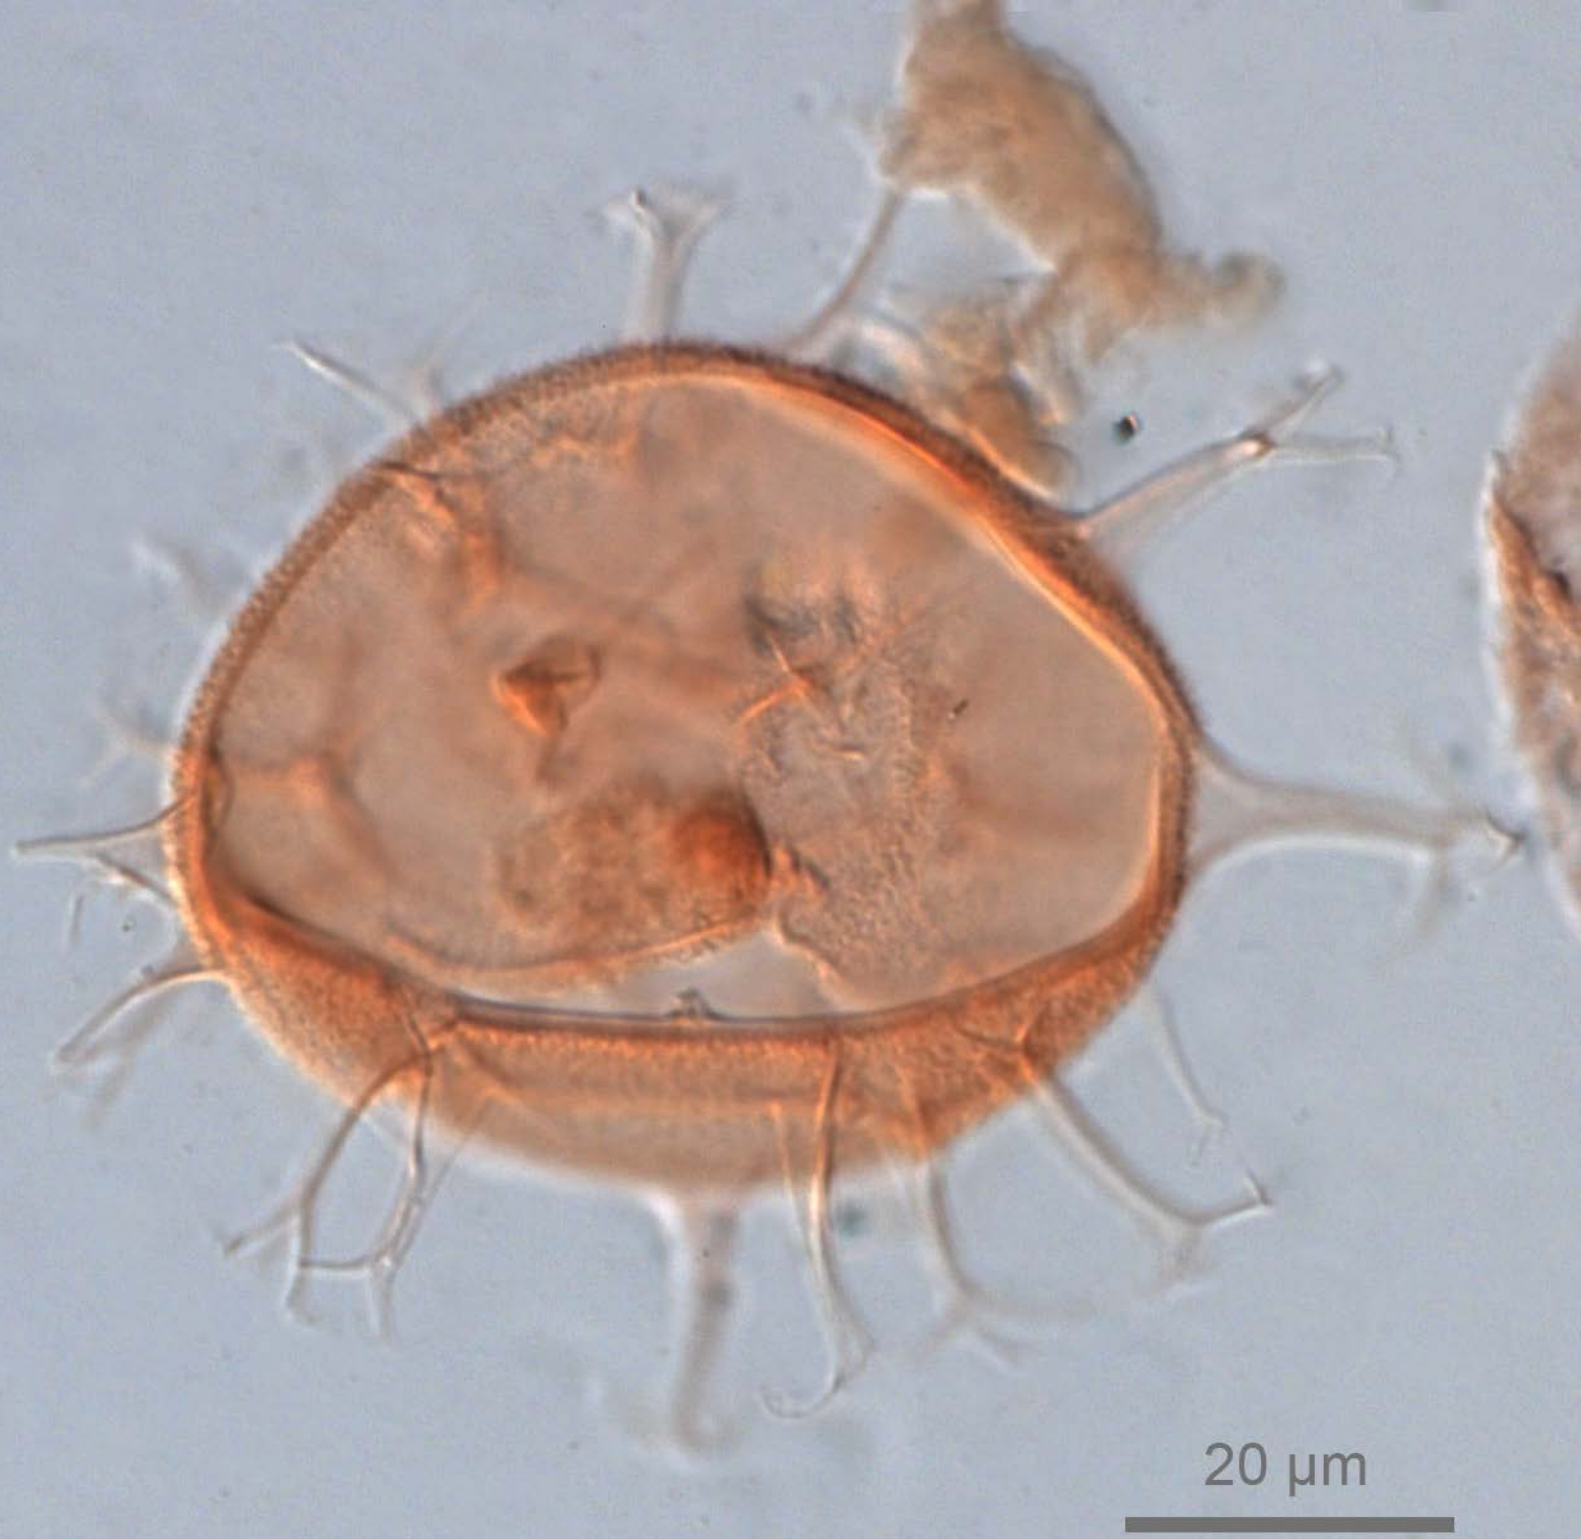

*Achomosphaera callosa* Matsuoka 1983 : holotype



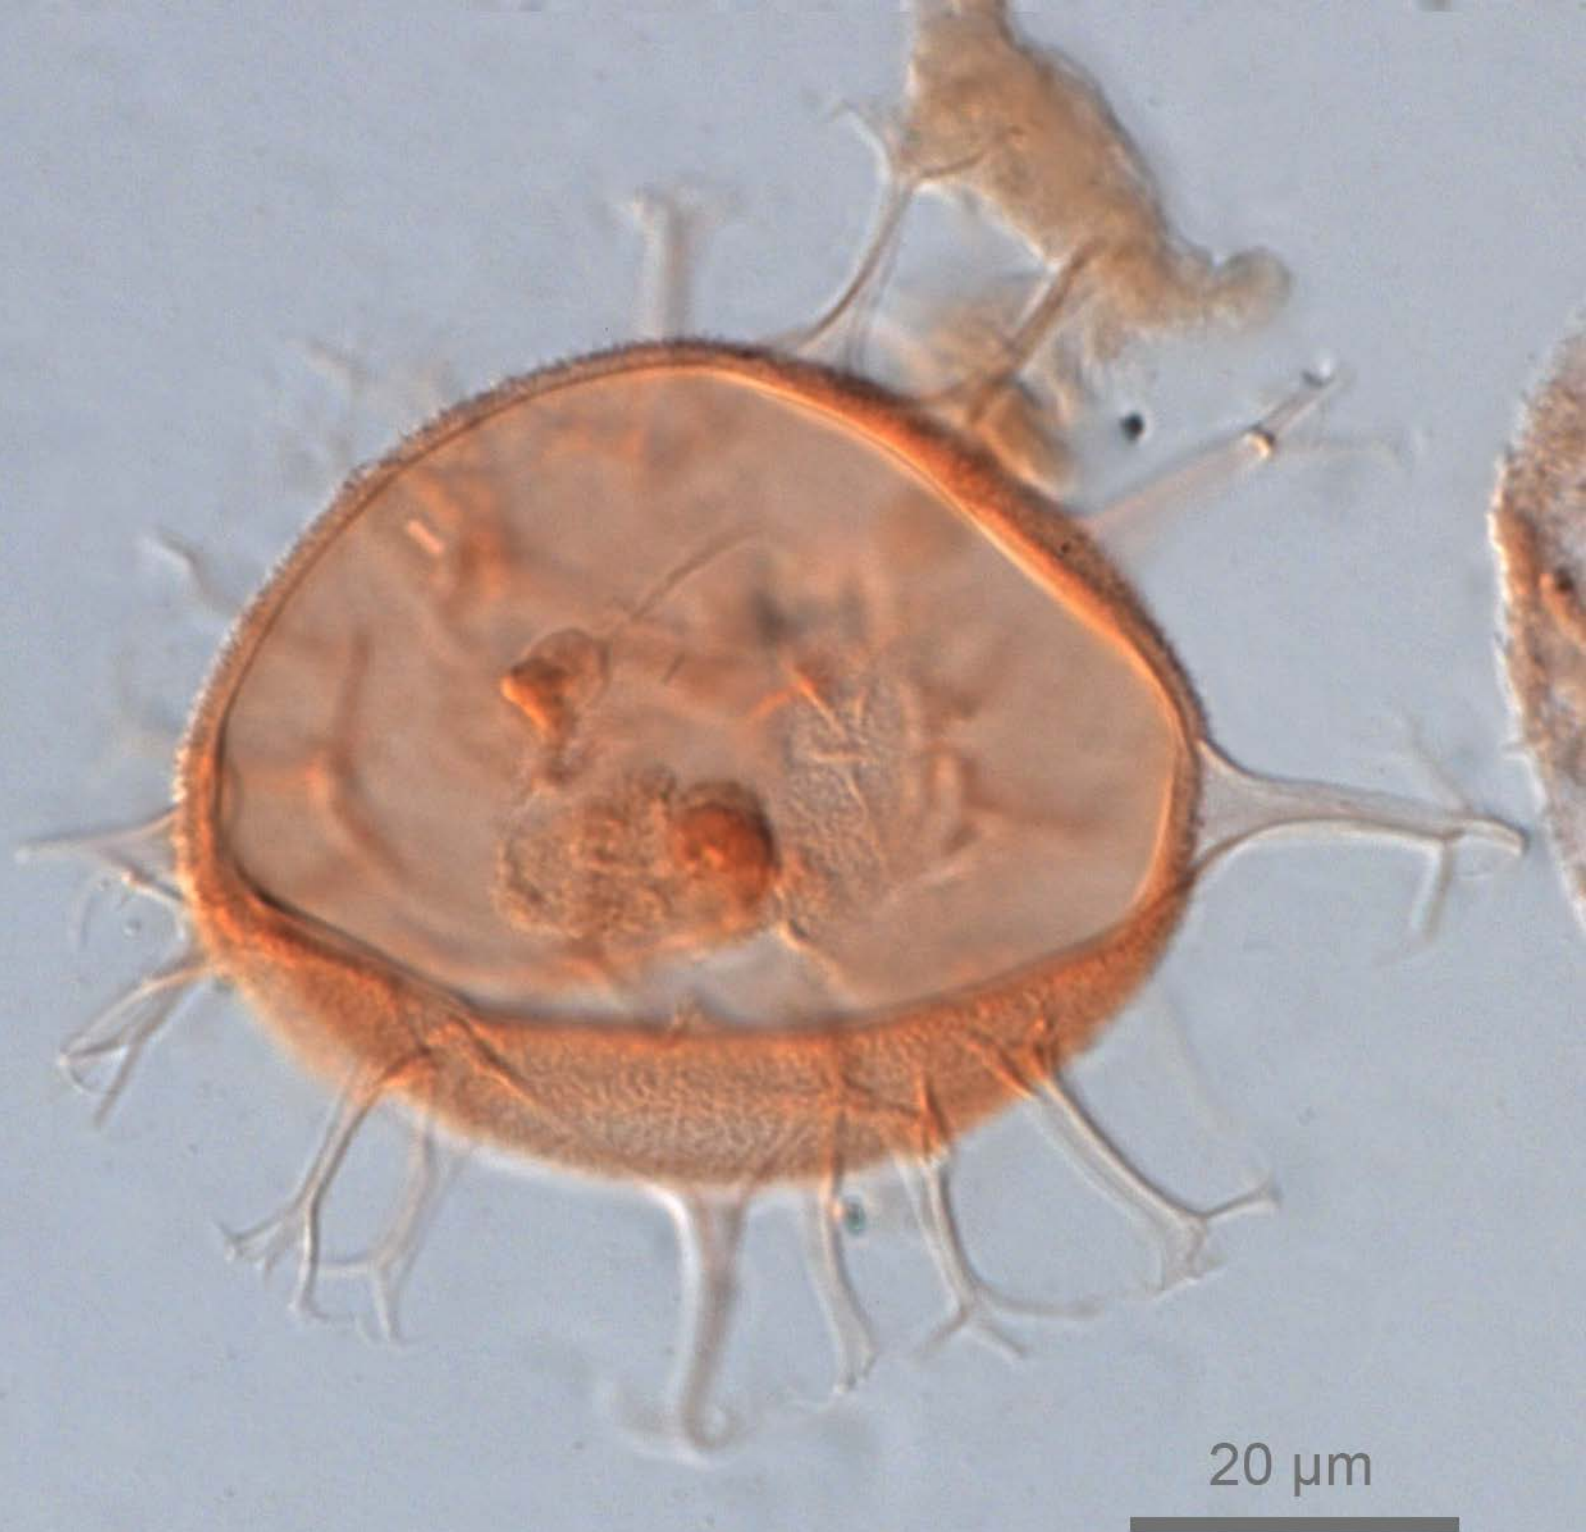

*Achomosphaera callosa* Matsuoka 1983 : holotype

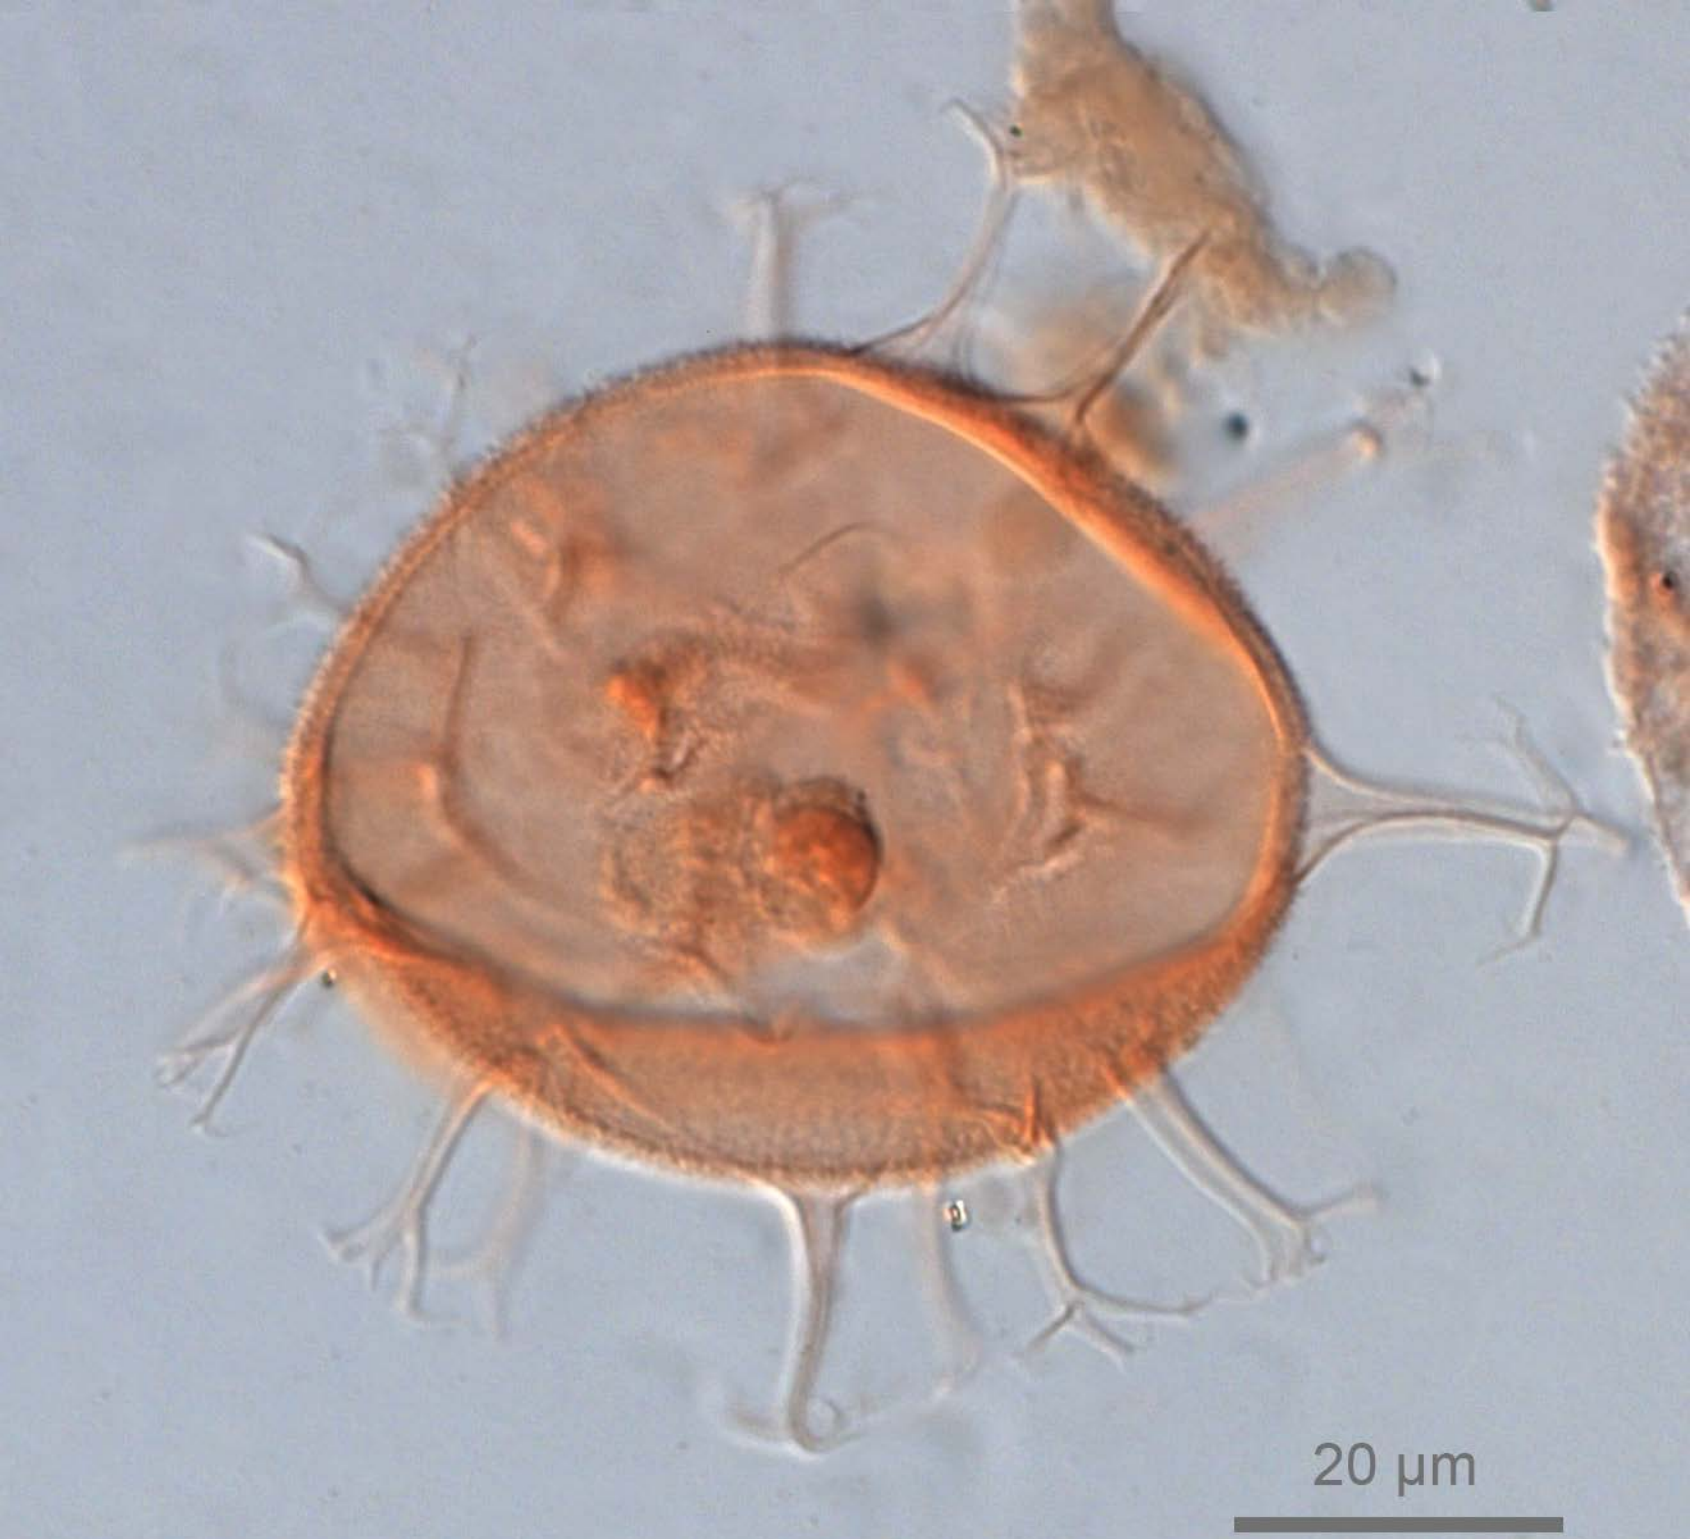

*Achomosphaera callosa* Matsuoka 1983 : holotype



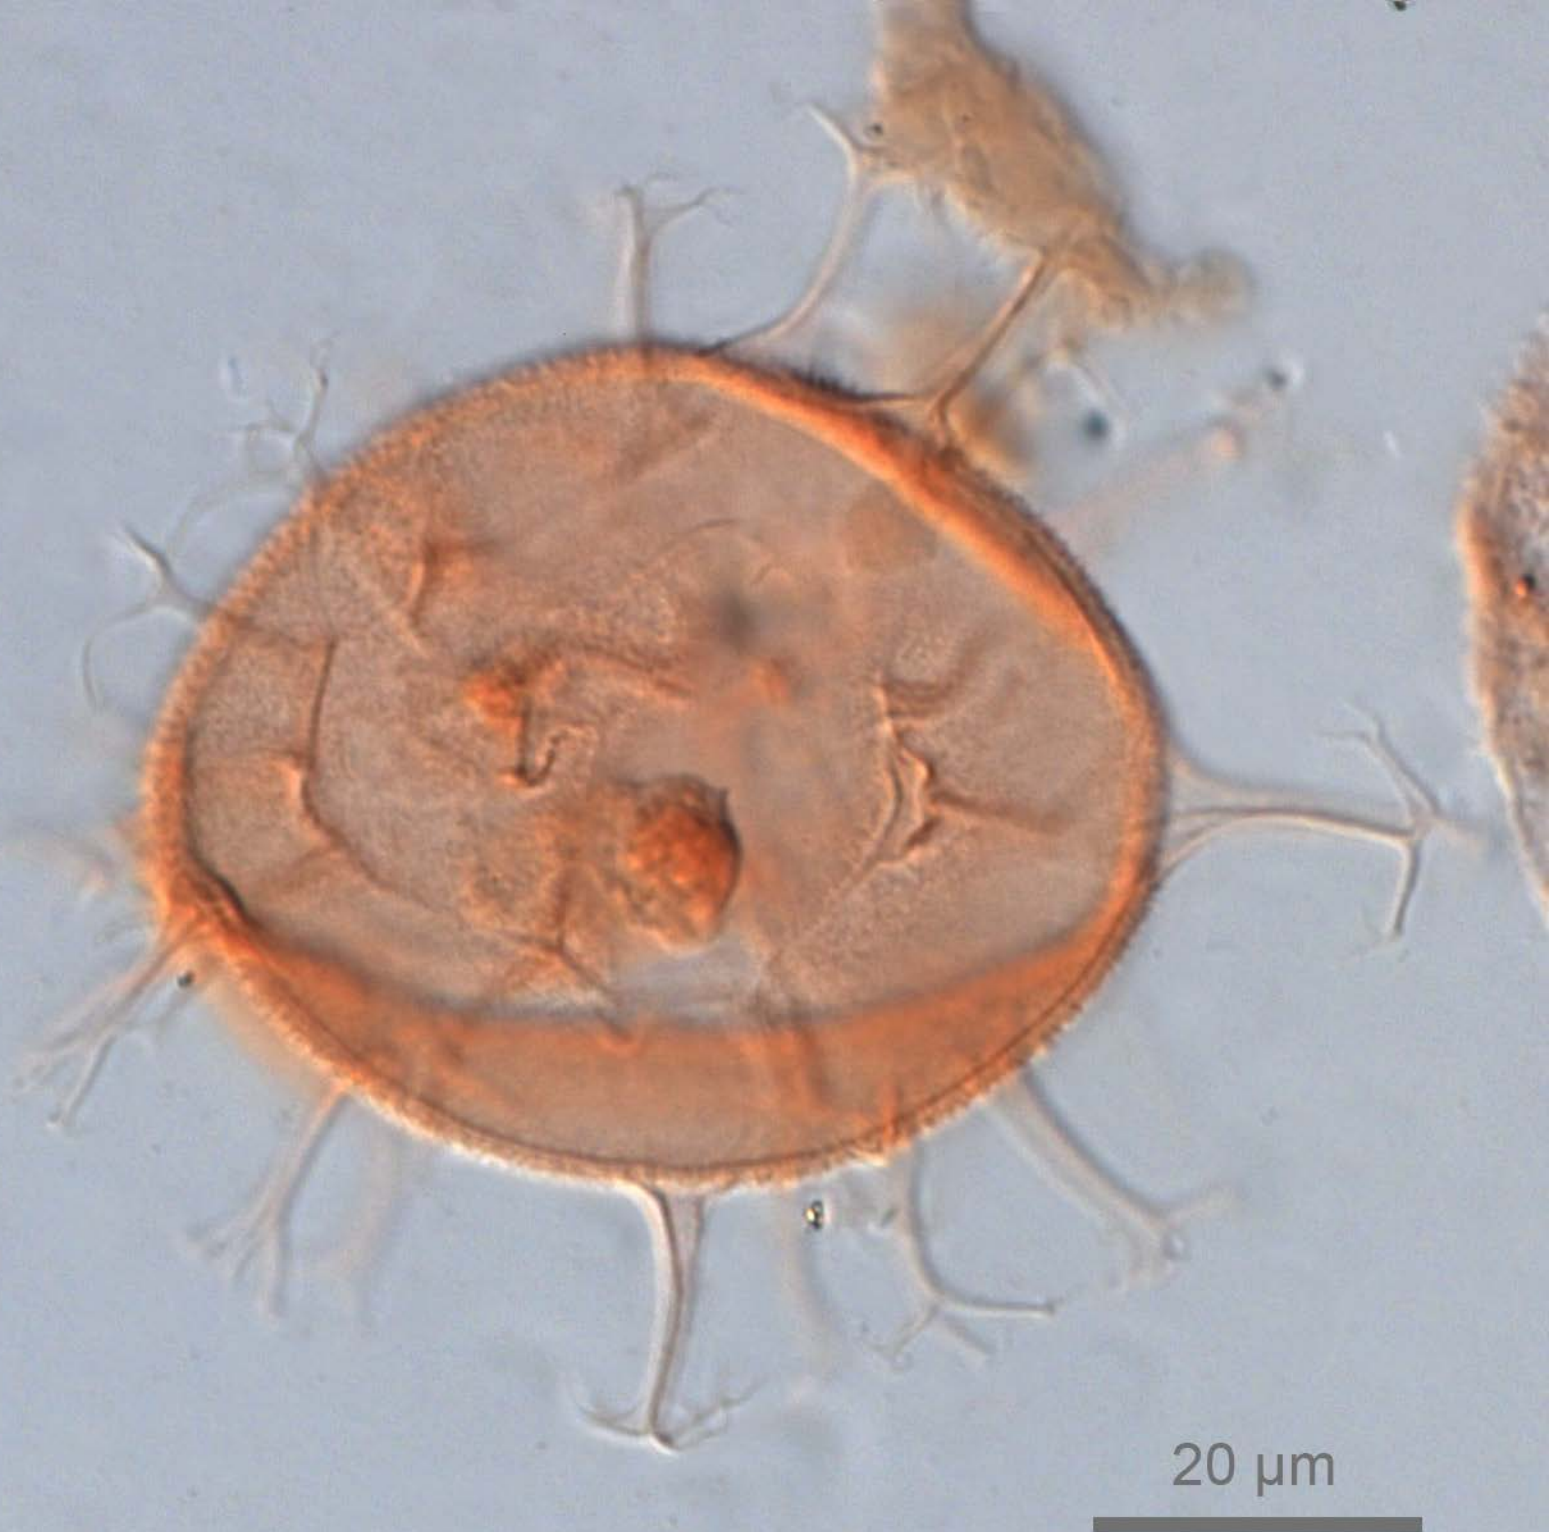

*Achomosphaera callosa* Matsuoka 1983 : holotype

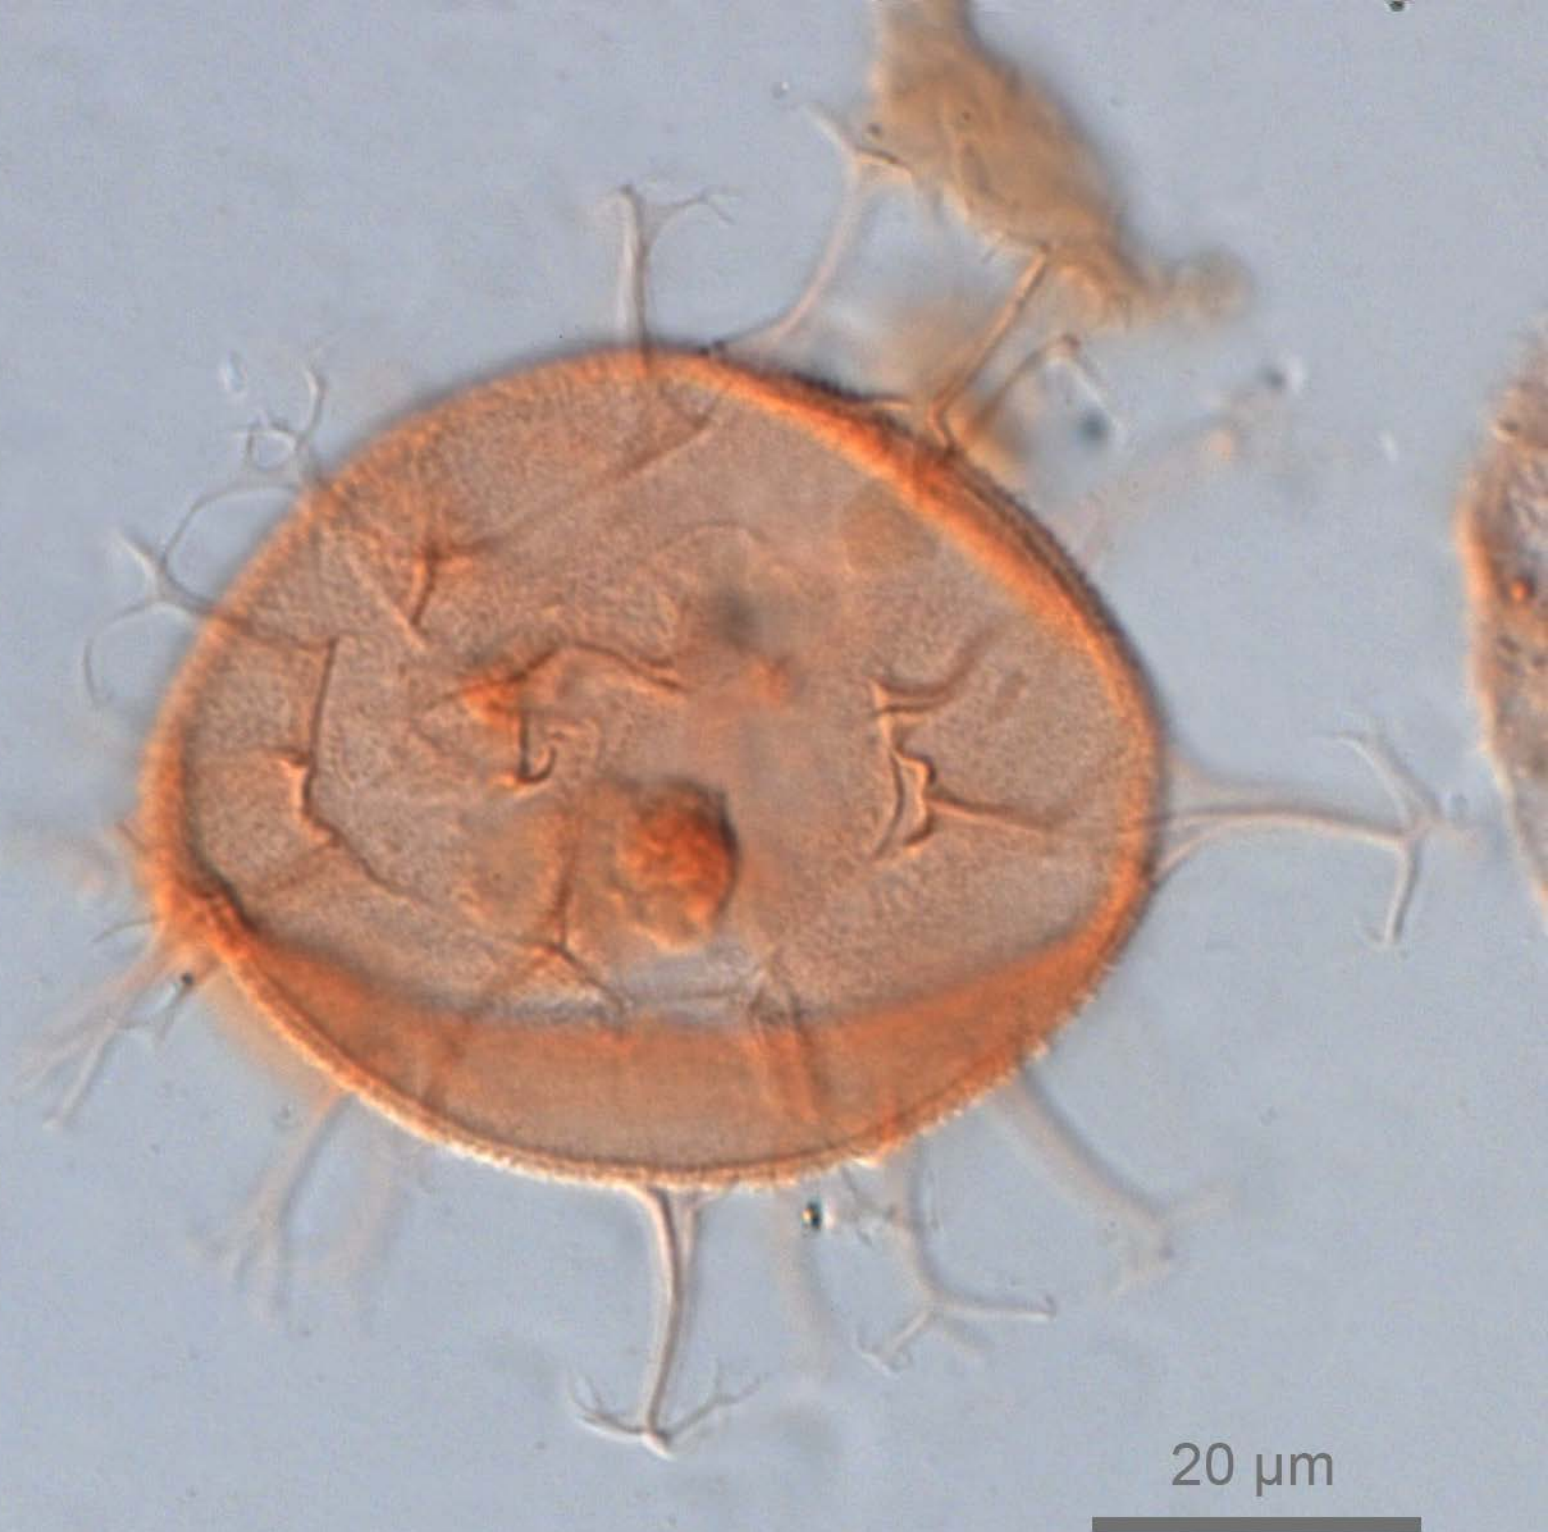

*Achomosphaera callosa* Matsuoka 1983 : holotype



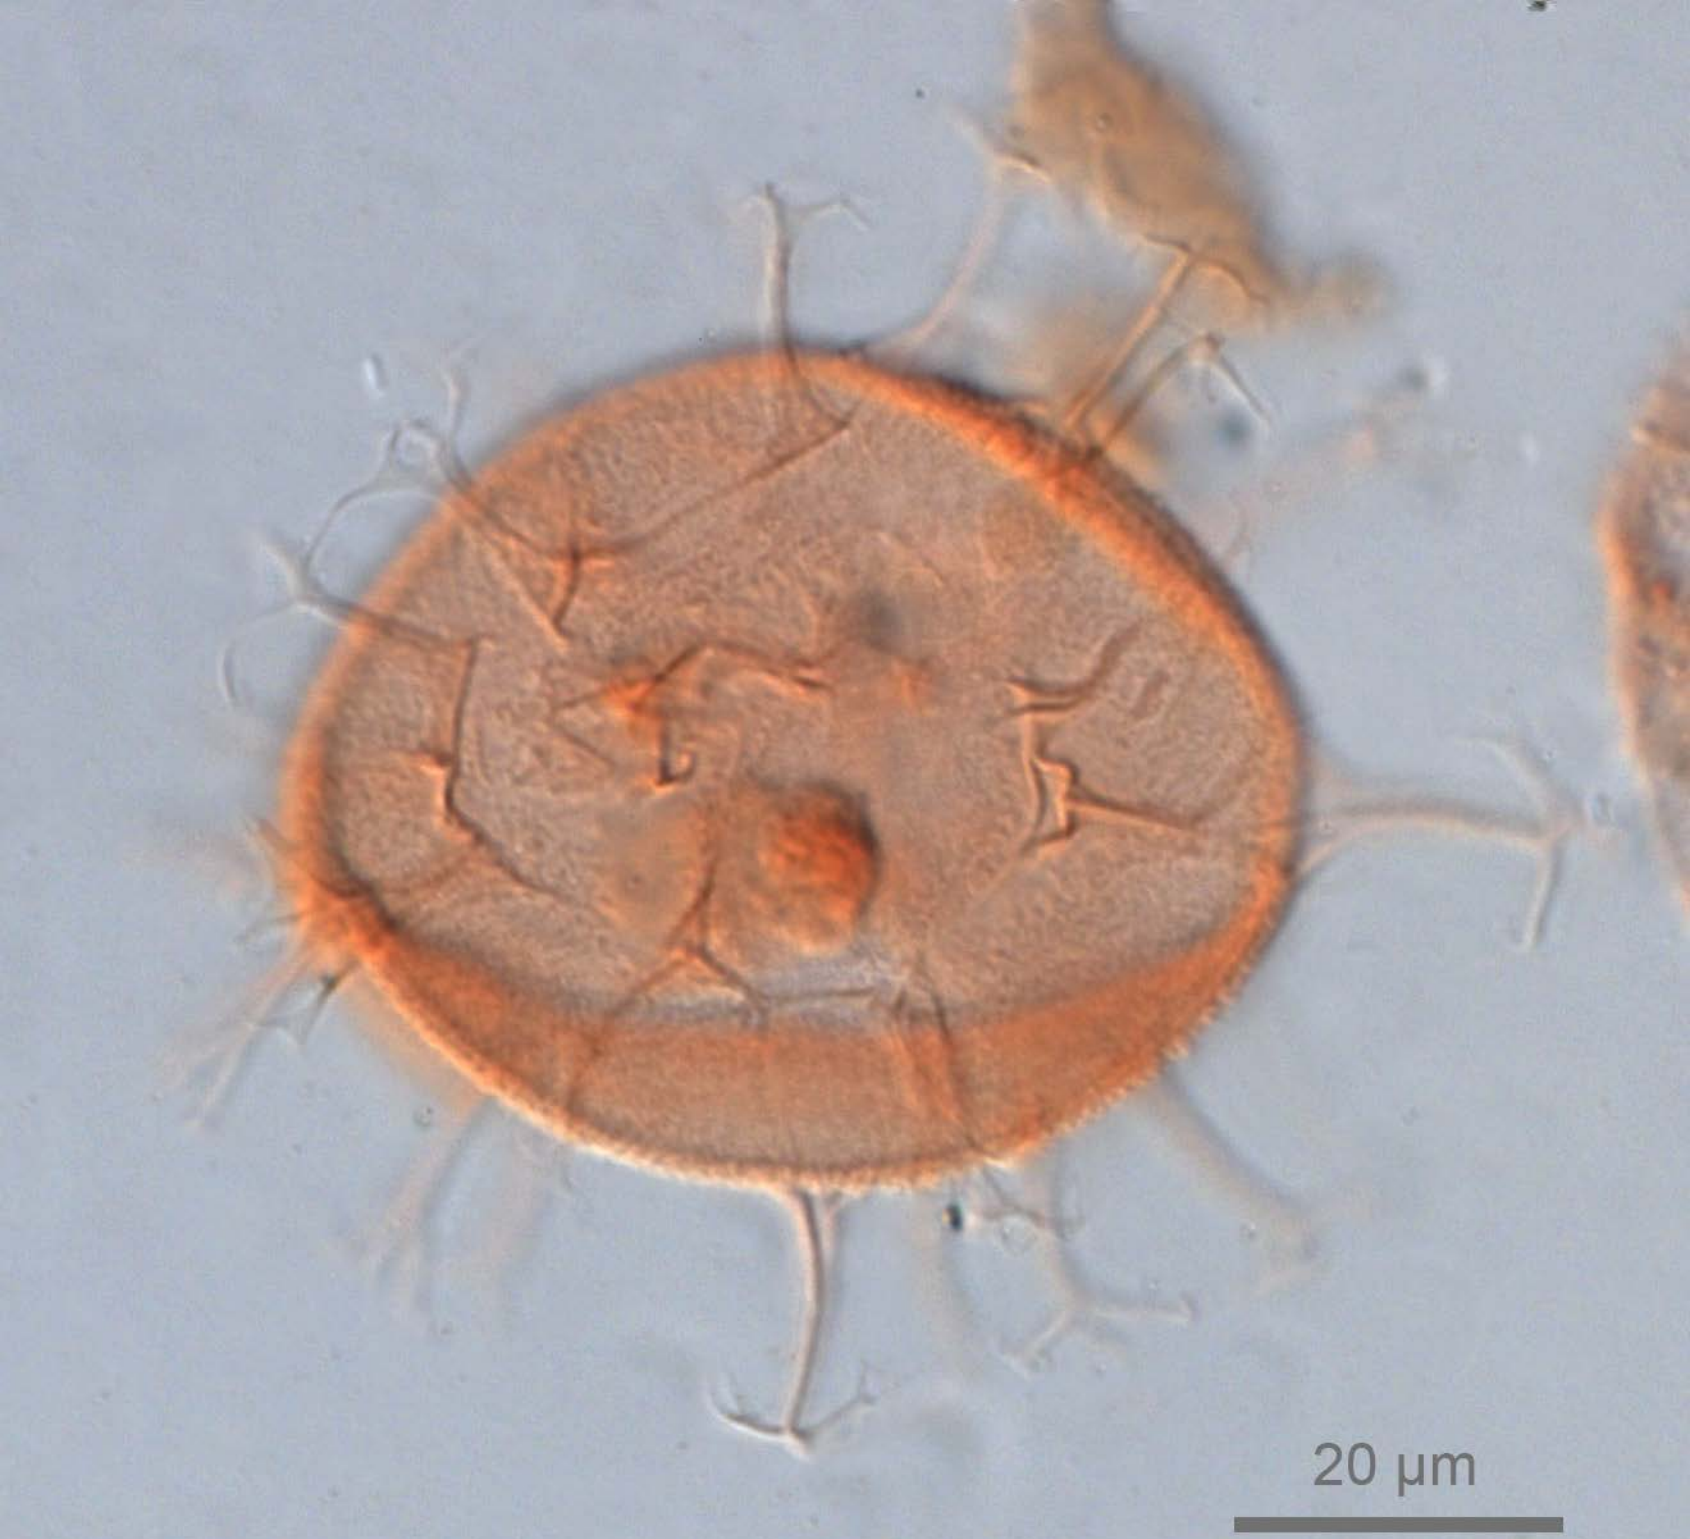

*Achomosphaera callosa* Matsuoka 1983 : holotype

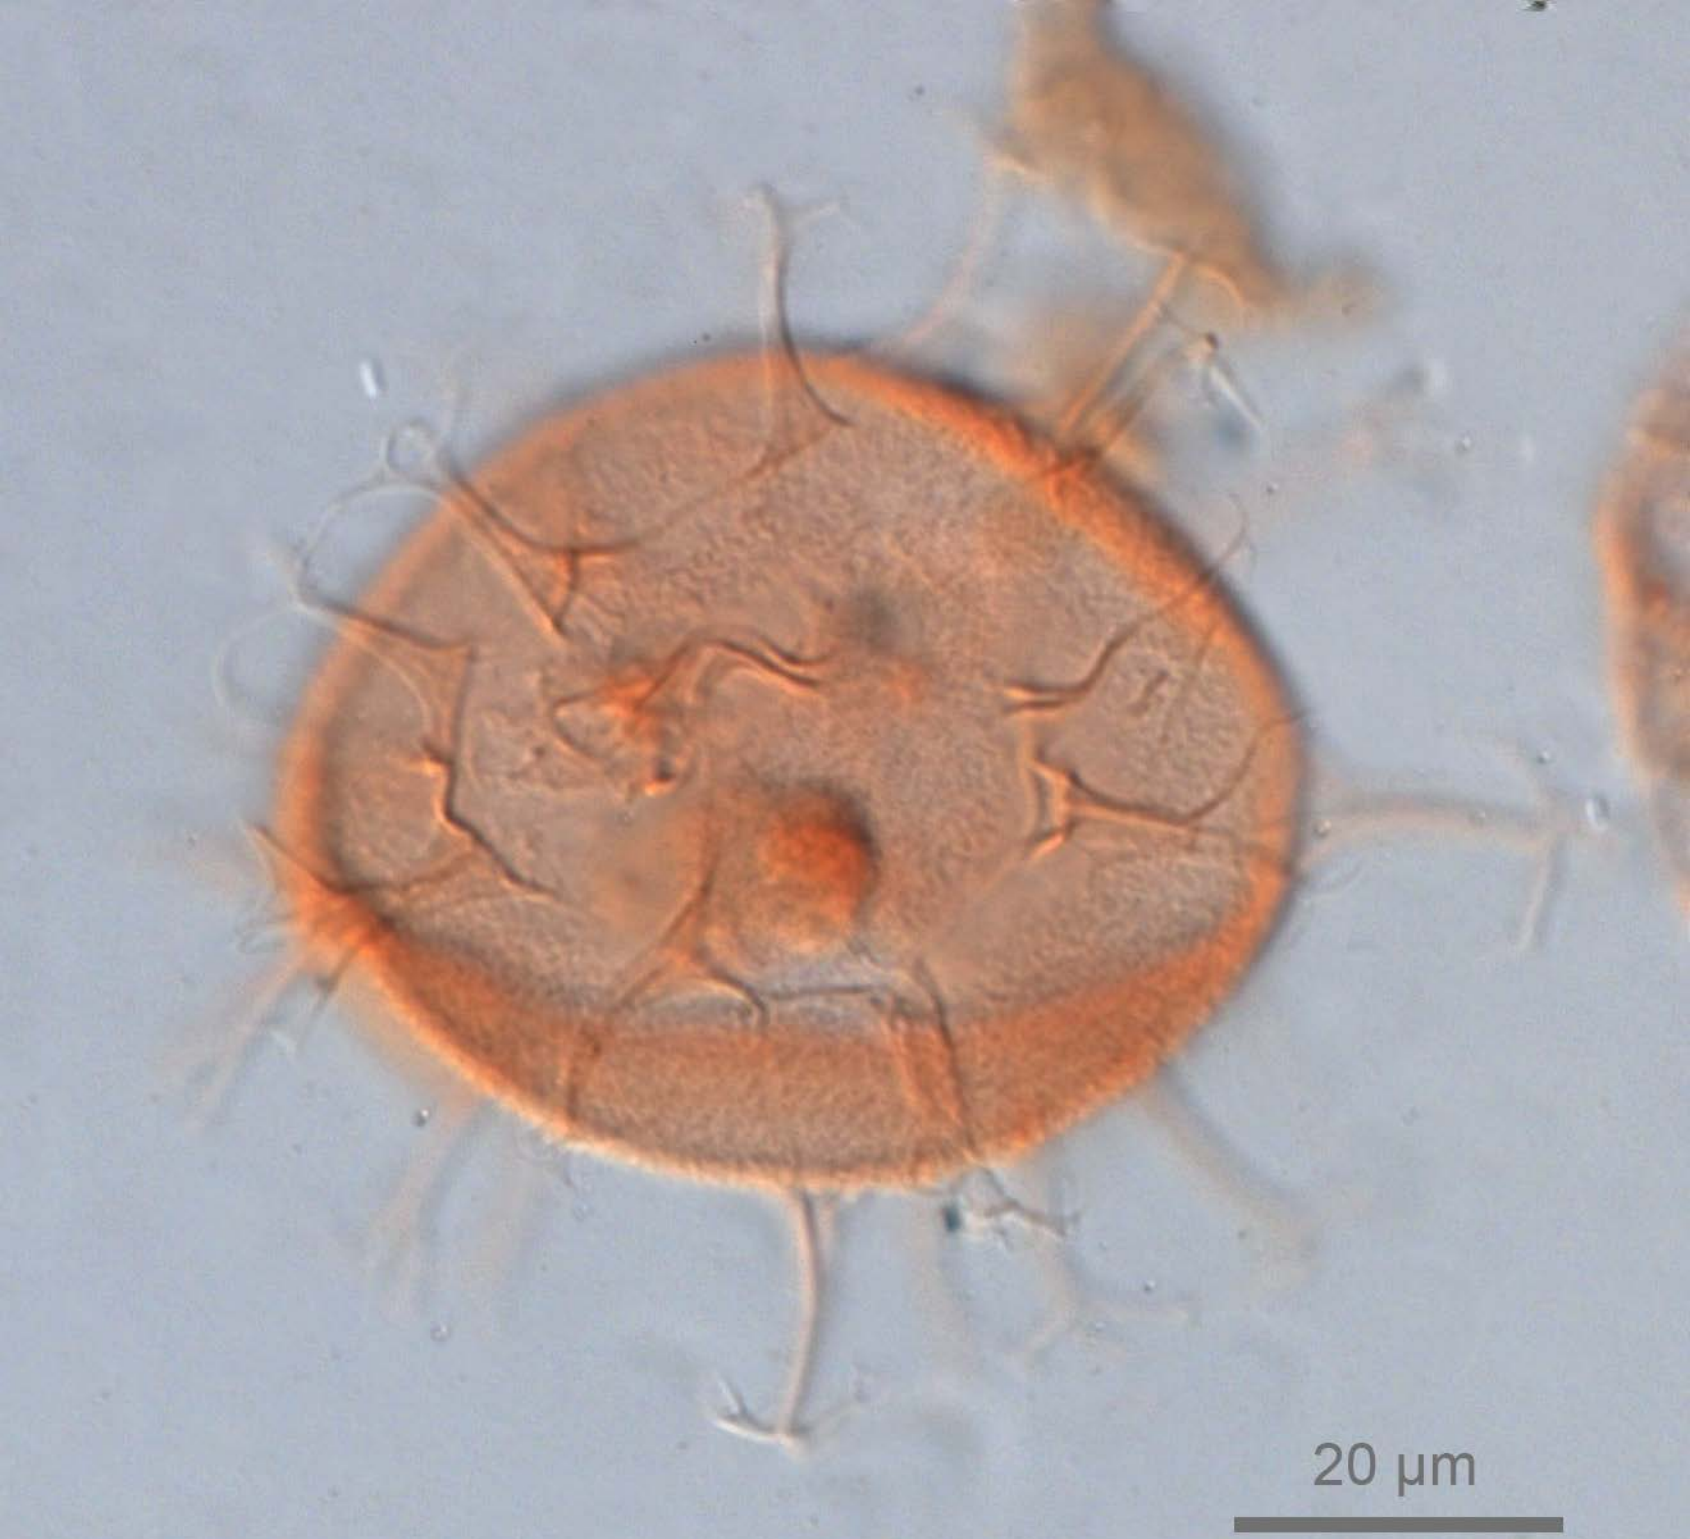

*Achomosphaera callosa* Matsuoka 1983 : holotype



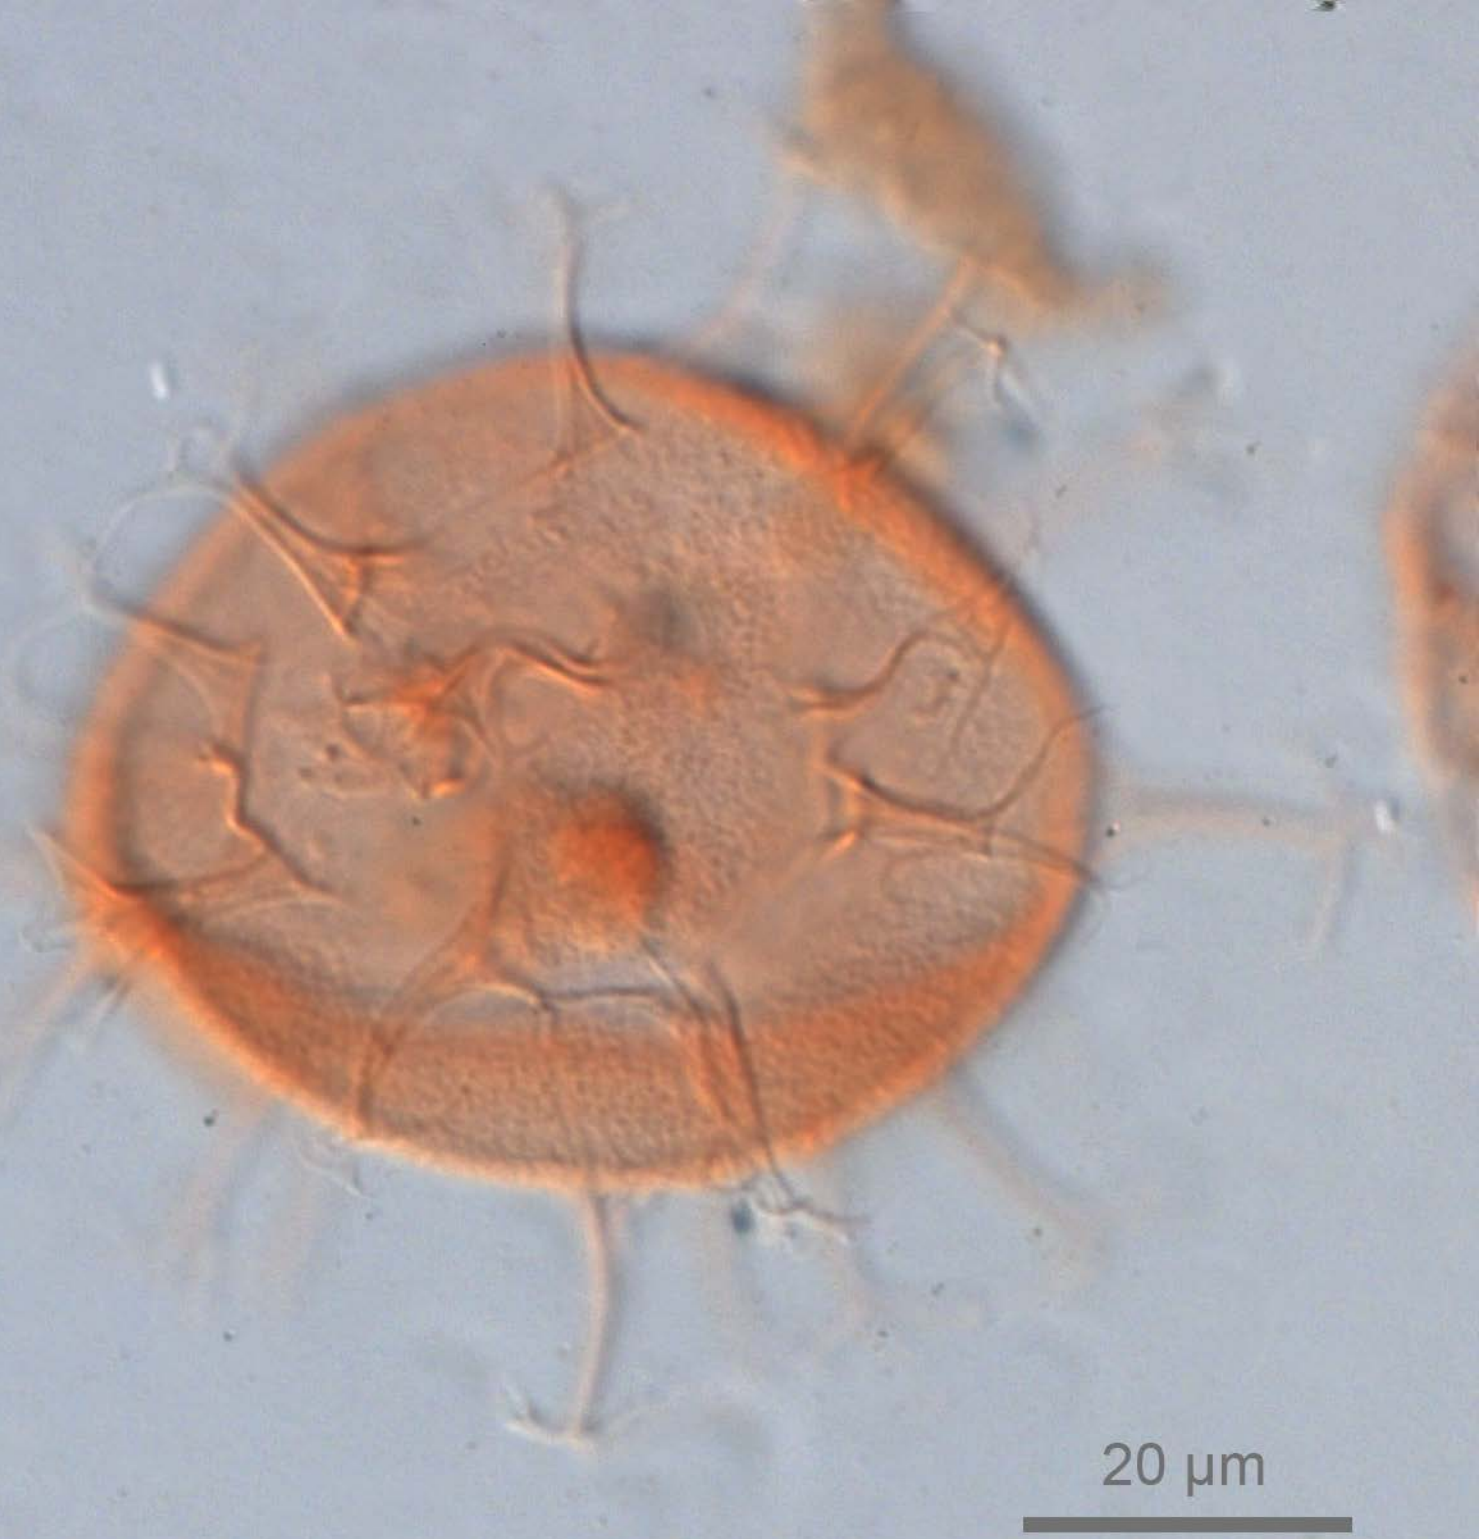

*Achomosphaera callosa* Matsuoka 1983 : holotype

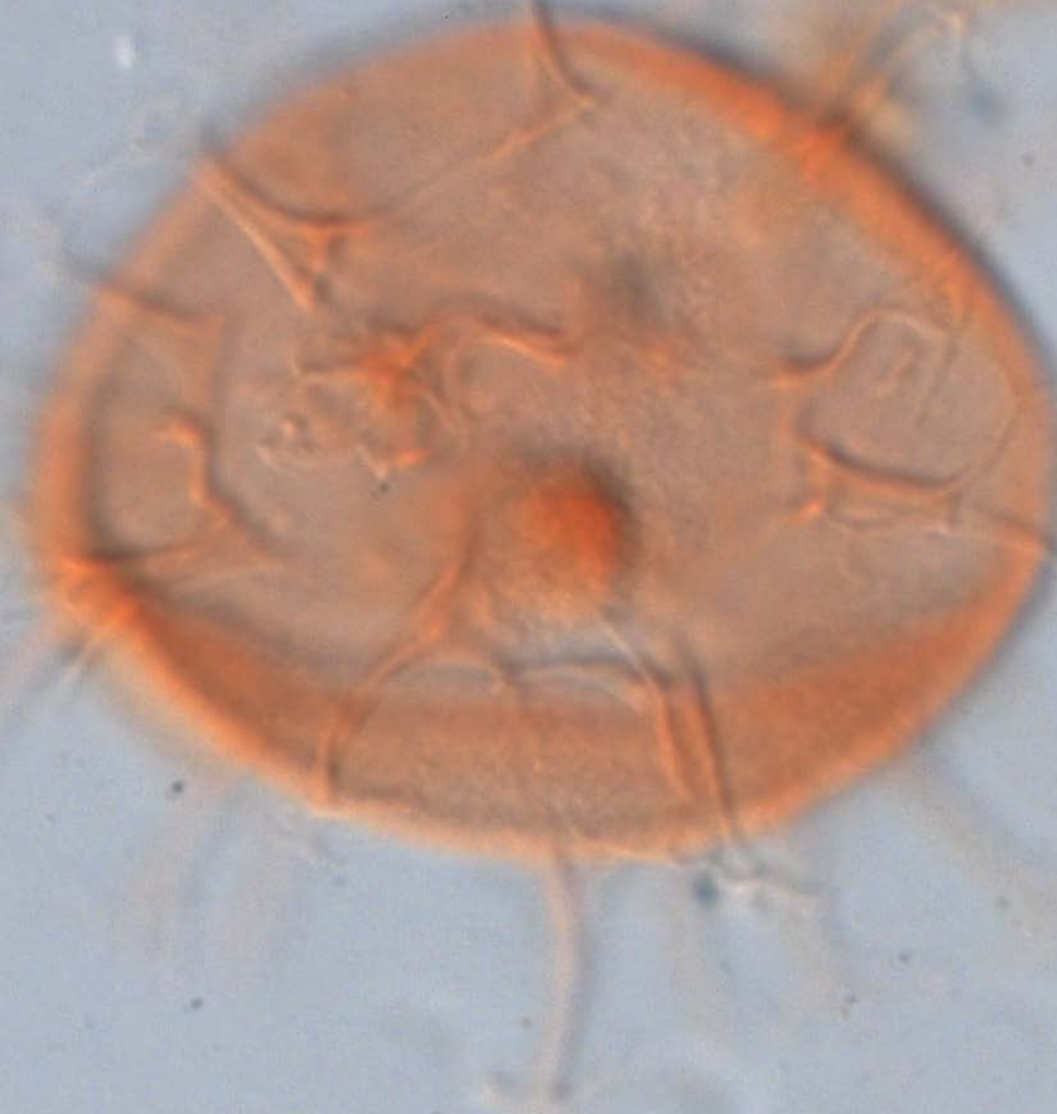

20  $\mu\text{m}$

*Achomosphaera callosa* Matsuoka 1983 : holotype
