# Supplementary material
Source: publisher figshare collection journal article supplement (https://tandf.figshare.com/articles/dataset/_/7466618)
Supplement: Supplementary file 20 [file 1]

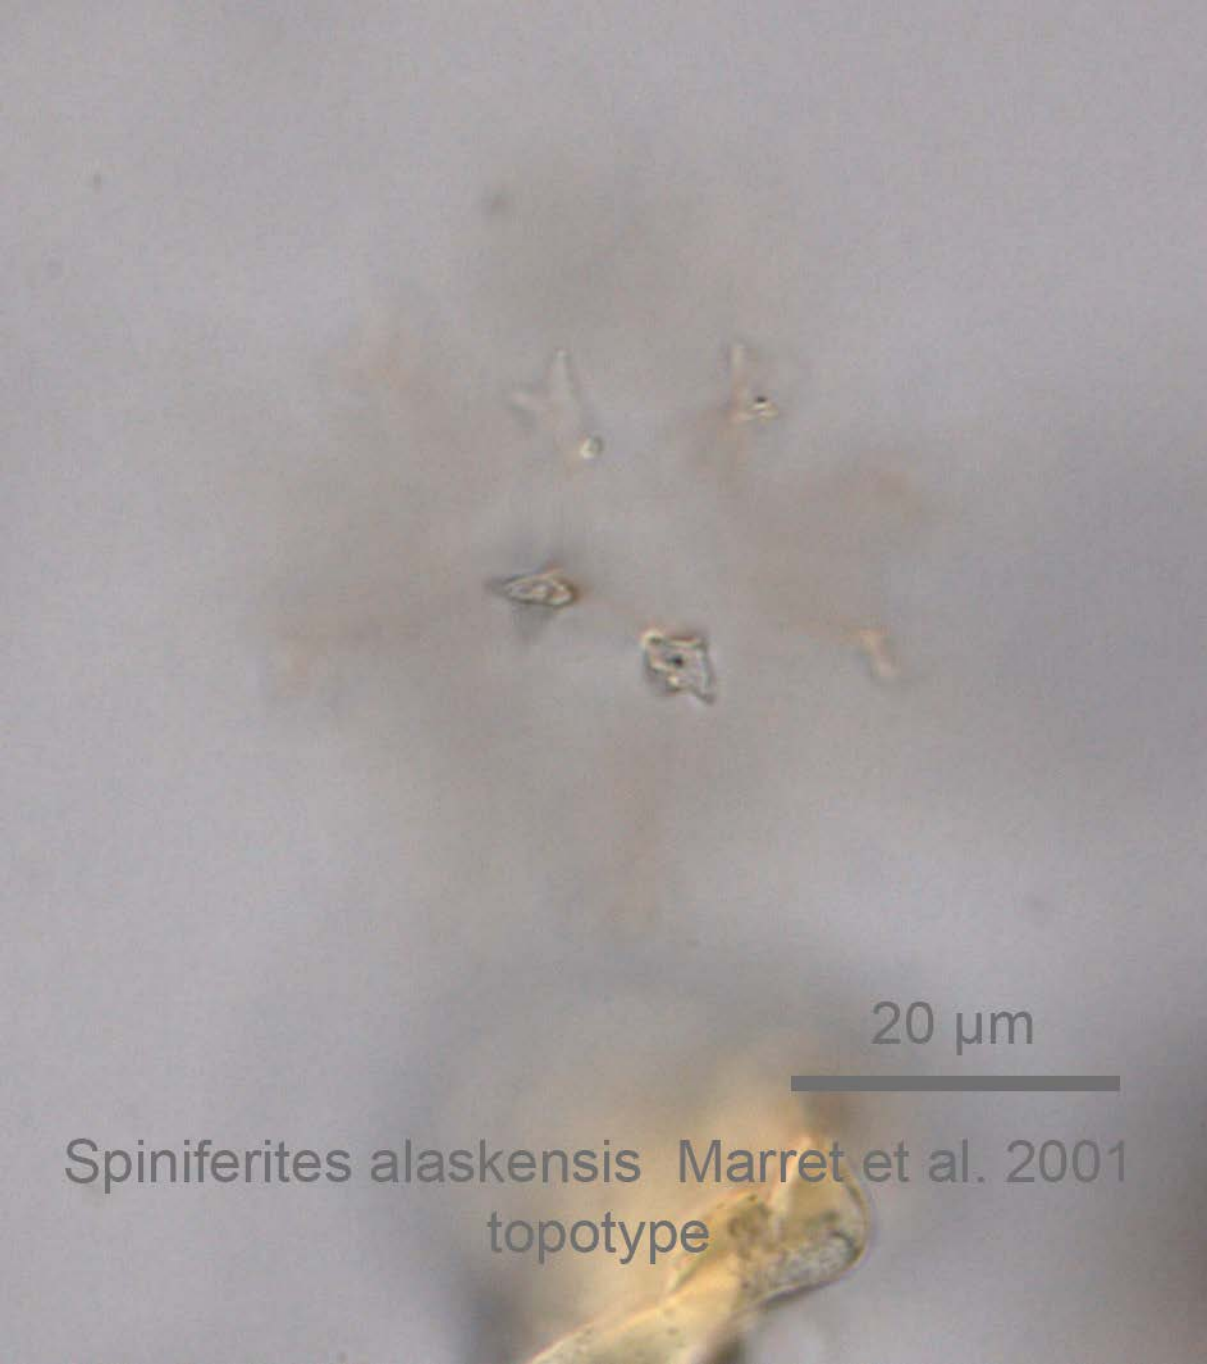

20  $\mu\text{m}$

*Spiniferites alaskensis* Marret et al. 2001  
topotype

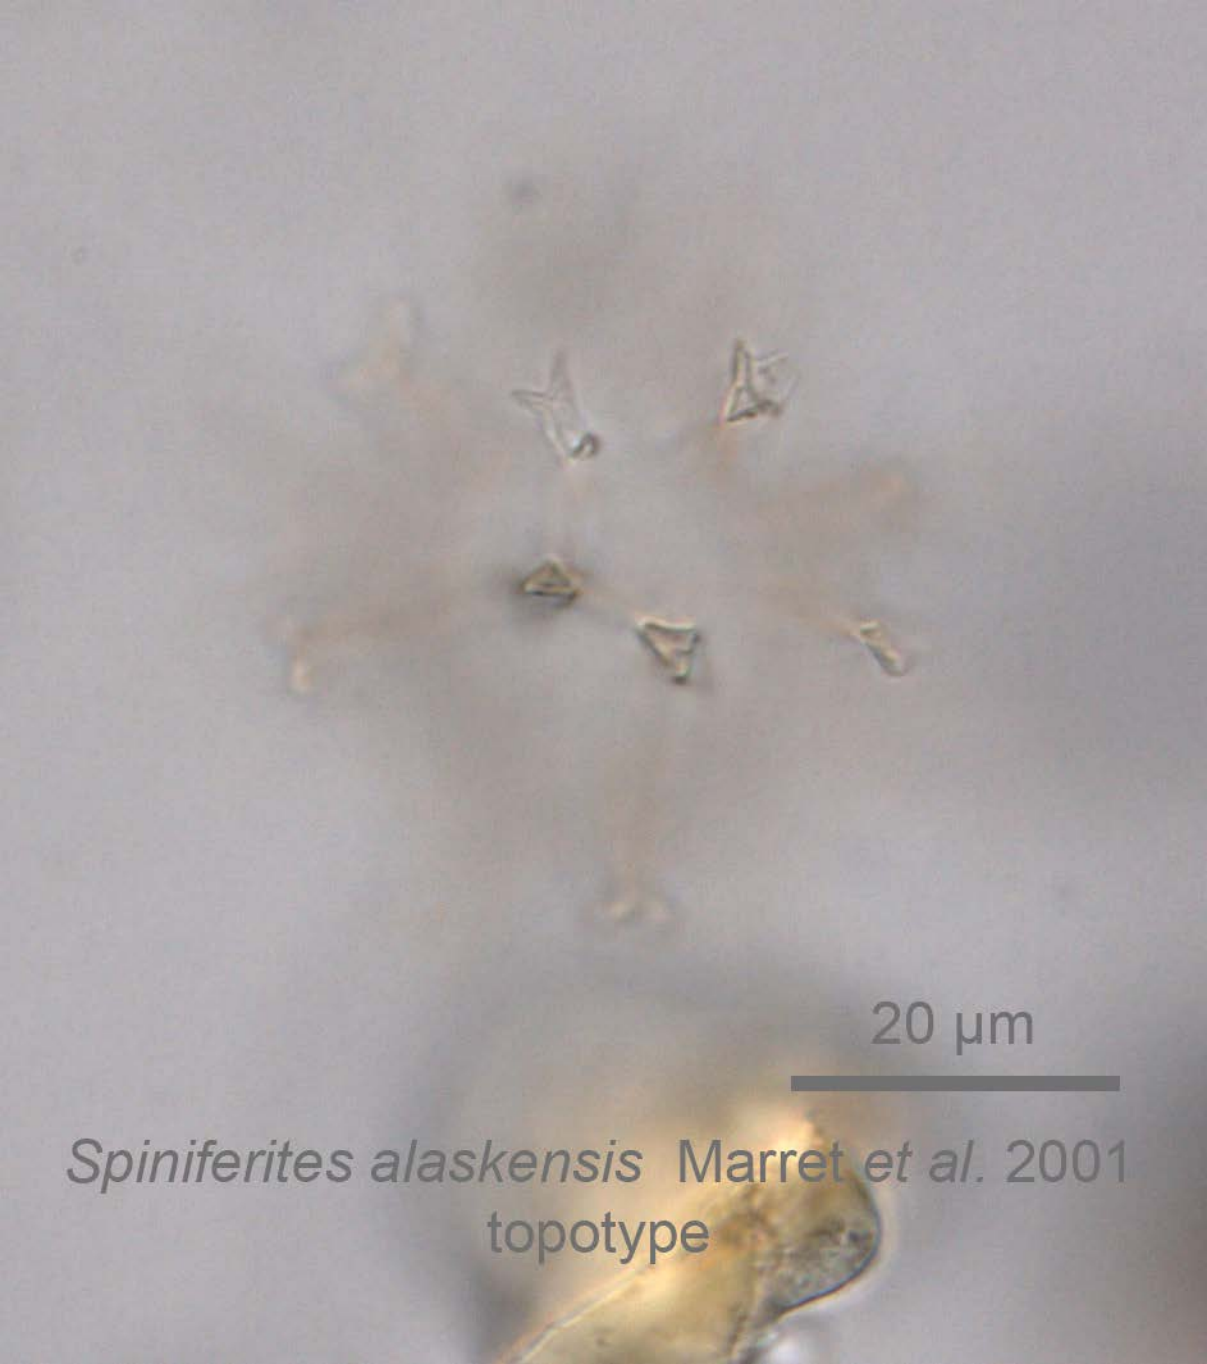

20  $\mu\text{m}$

*Spiniferites alaskensis* Marret et al. 2001  
topotype

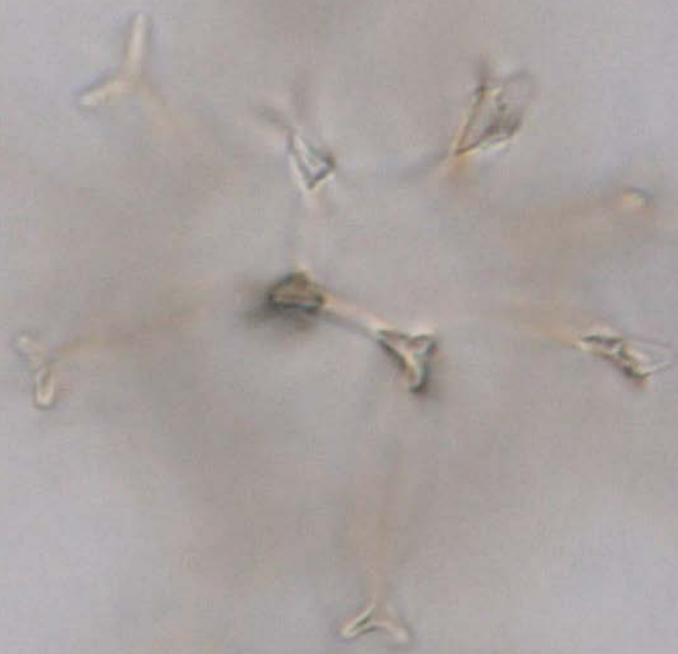

20  $\mu\text{m}$

*Spiniferites alaskensis* Marret et al. 2001  
topotype

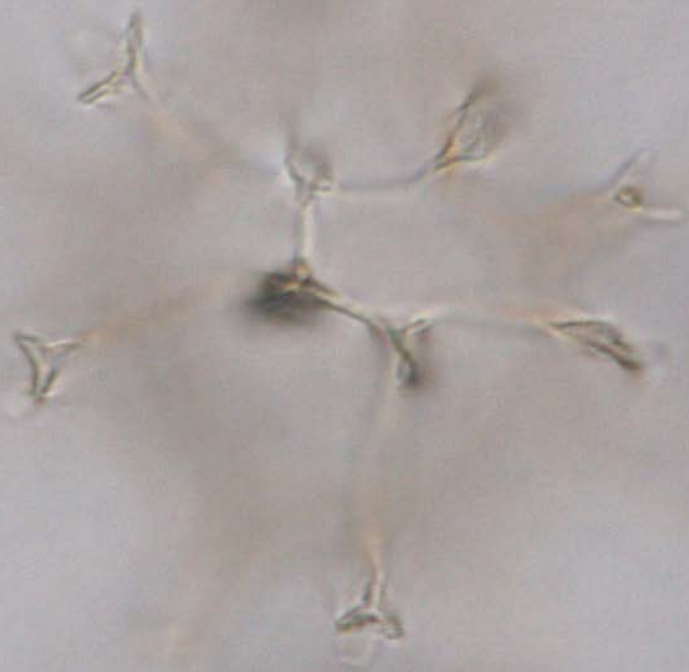

20  $\mu\text{m}$

*Spiniferites alaskensis* Marret et al. 2001  
topotype

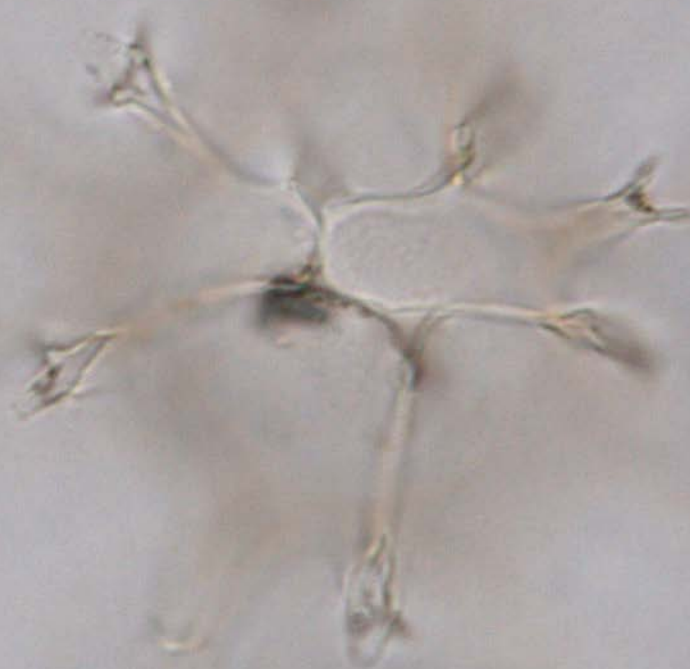

20  $\mu\text{m}$

*Spiniferites alaskensis* Marret et al. 2001  
topotype



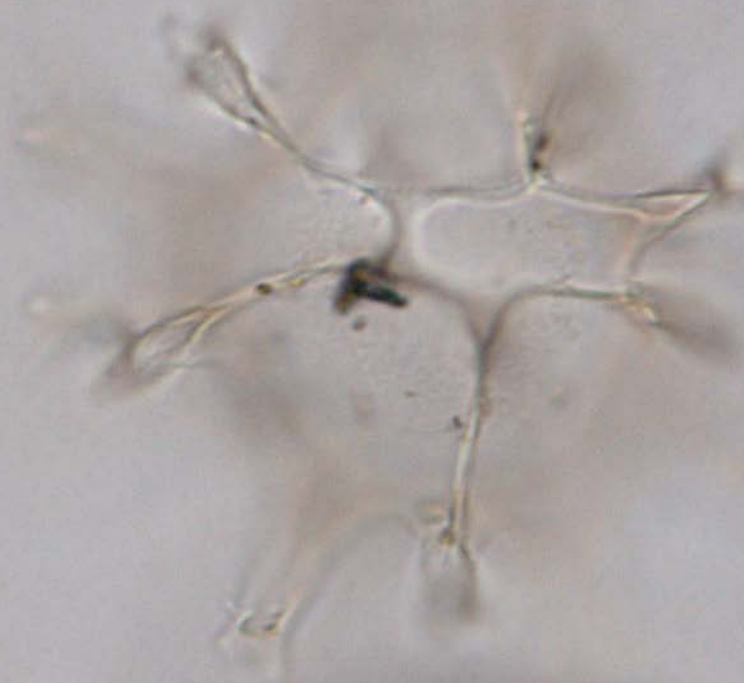

20  $\mu\text{m}$

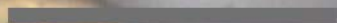

*Spiniferites alaskensis* Marret *et al.* 2001  
topotype

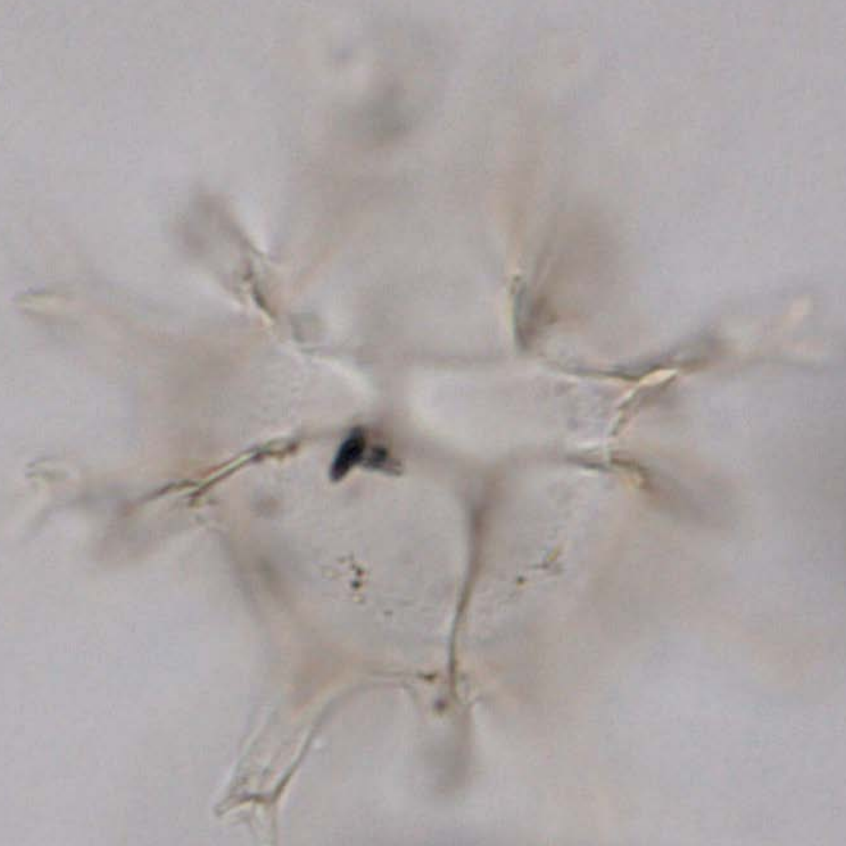

20  $\mu\text{m}$

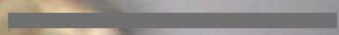

*Spiniferites alaskensis* Marret et al. 2001  
topotype

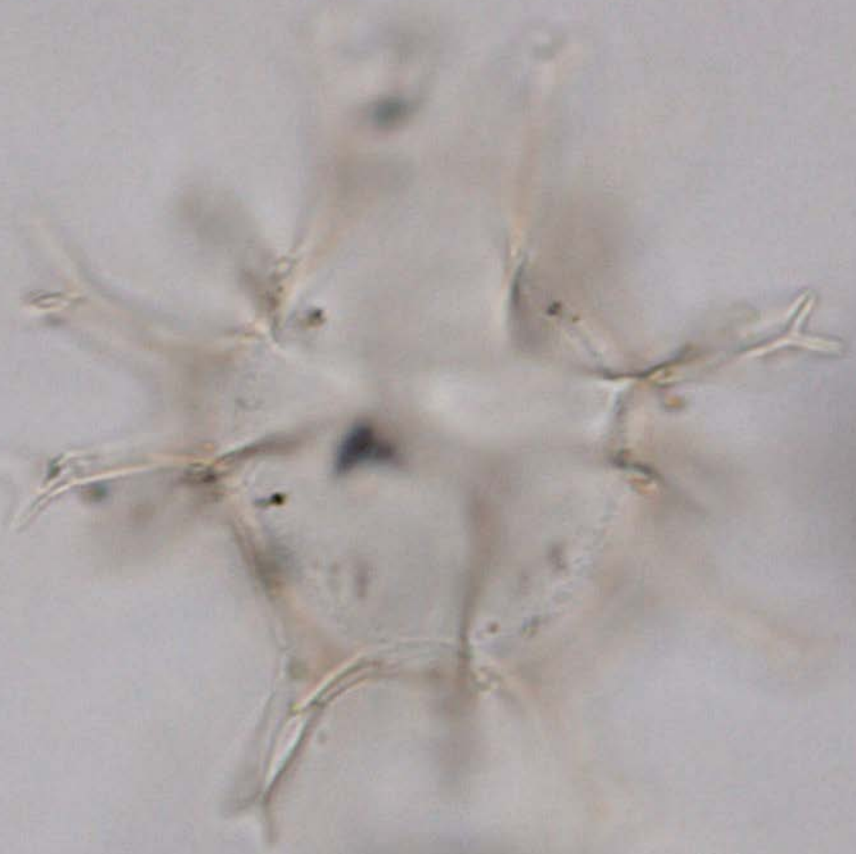

20  $\mu\text{m}$

*Spiniferites alaskensis* Marret et al. 2001  
topotype



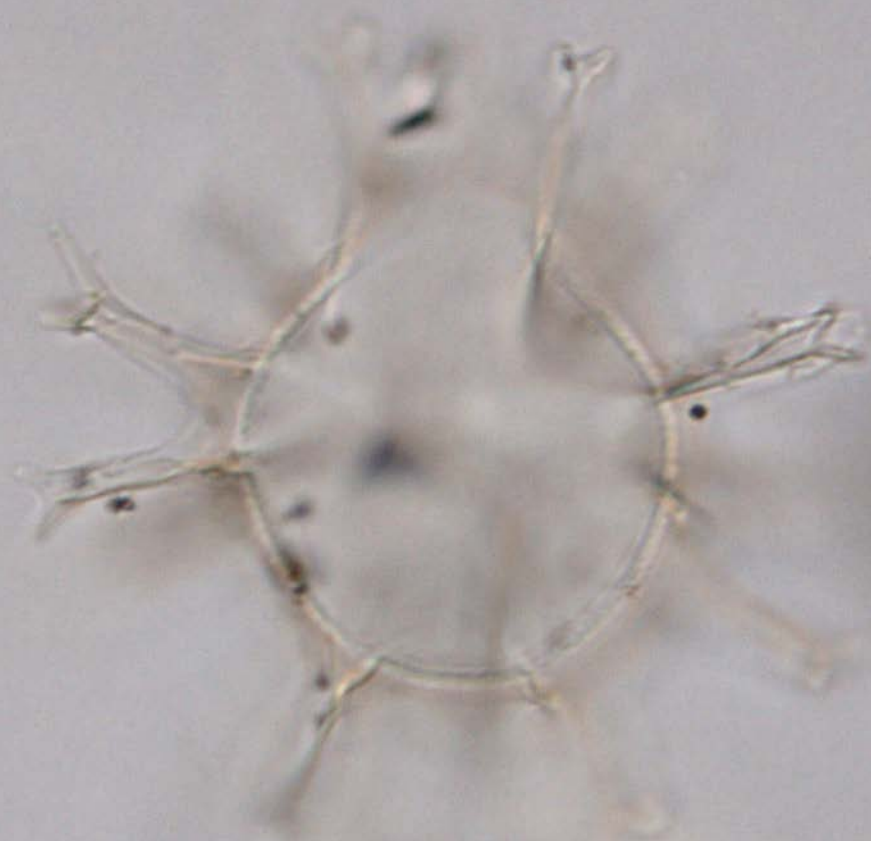

20  $\mu\text{m}$

*Spiniferites alaskensis* Marret et al. 2001  
topotype

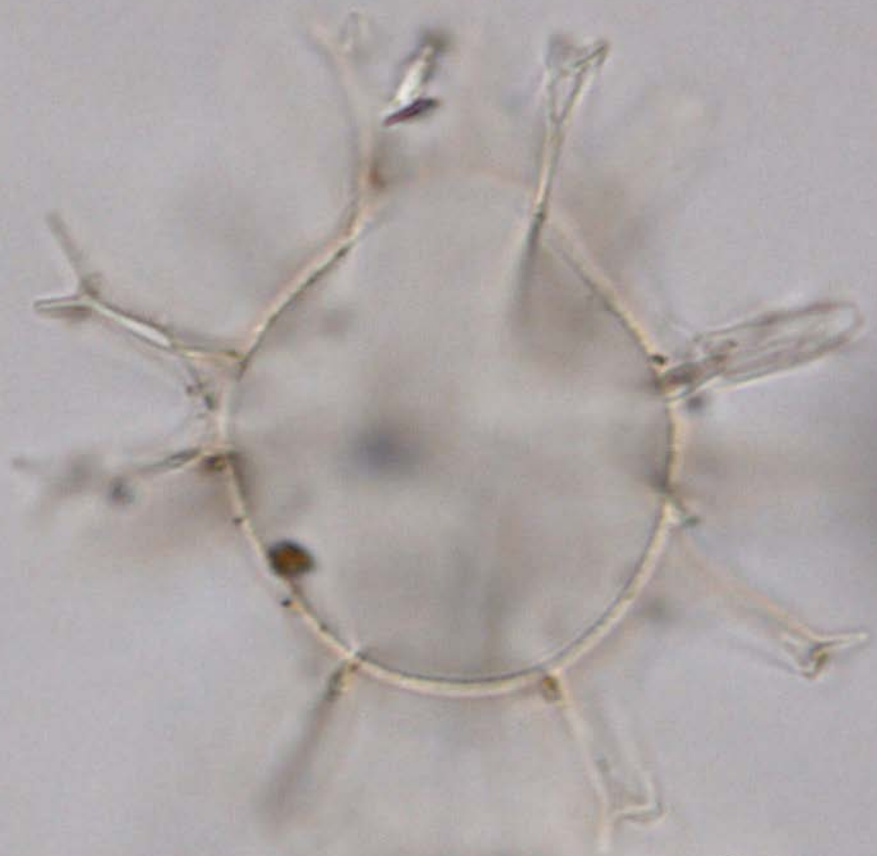

20  $\mu\text{m}$

*Spiniferites alaskensis* Marret et al. 2001  
topotype

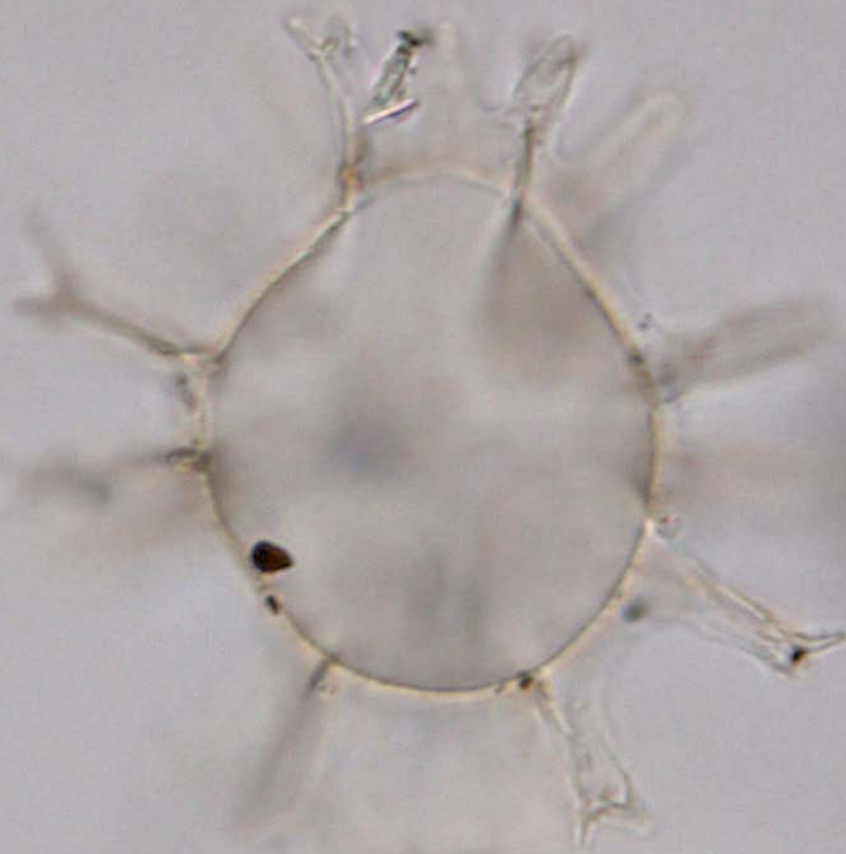

20  $\mu\text{m}$

*Spiniferites alaskensis* Marret et al. 2001  
topotype

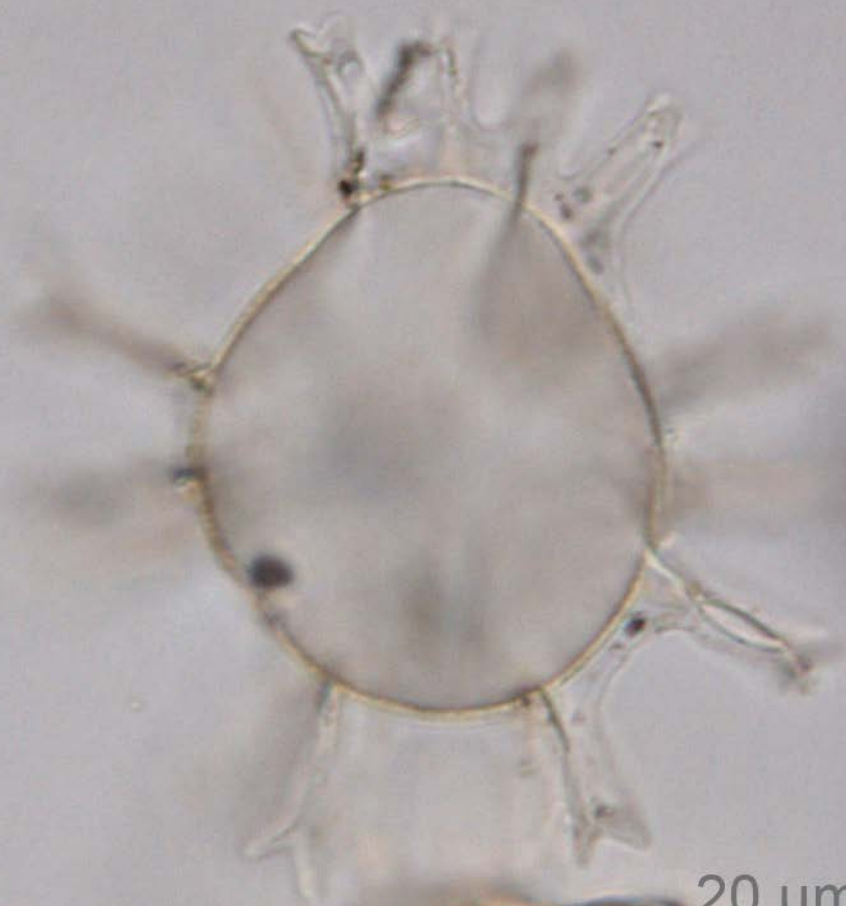

20  $\mu\text{m}$

*Spiniferites alaskensis* Marret et al. 2001  
topotype

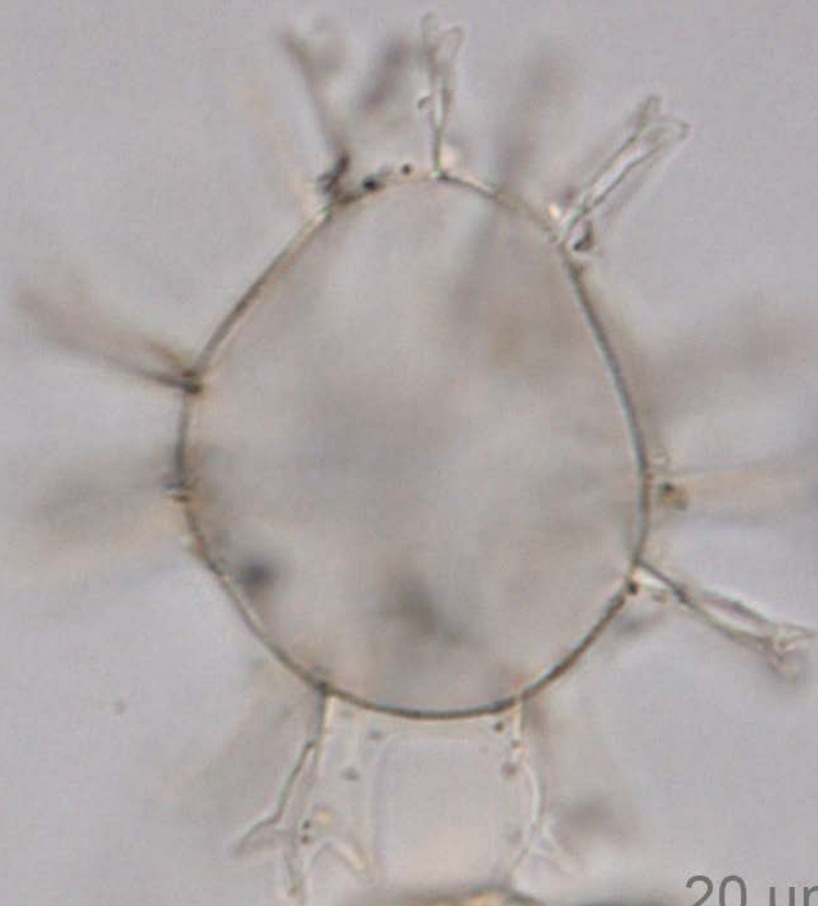

20  $\mu\text{m}$

*Spiniferites alaskensis* Marret et al. 2001  
topotype



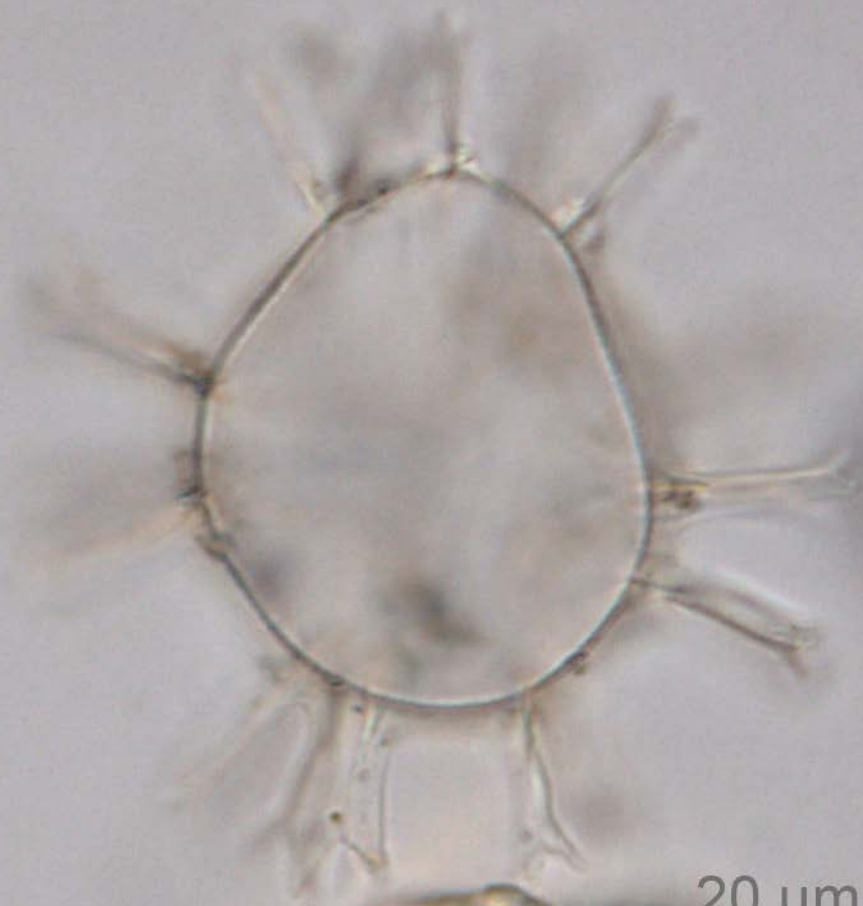

20  $\mu\text{m}$

*Spiniferites alaskensis* Marret et al. 2001  
topotype

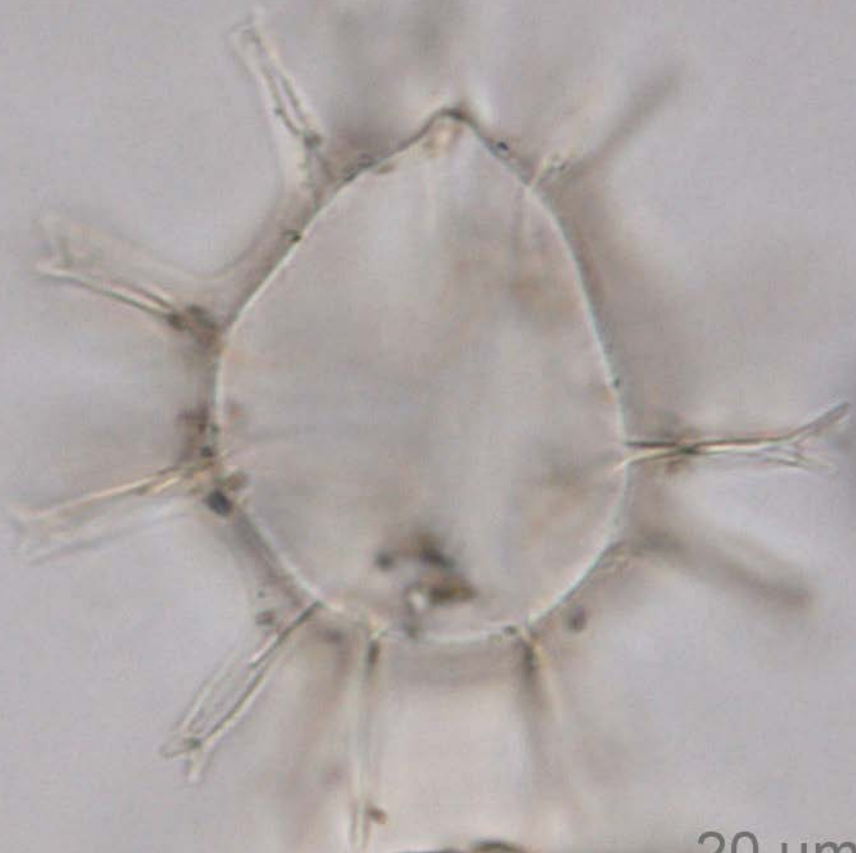

20  $\mu\text{m}$

*Spiniferites alaskensis* Marret et al. 2001  
topotype

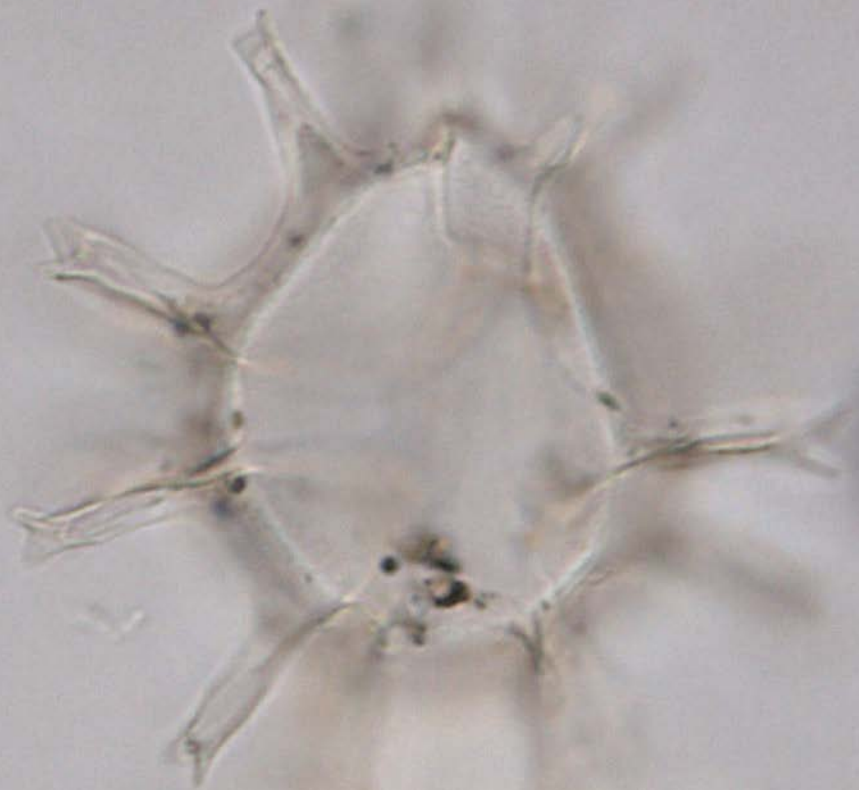

20  $\mu\text{m}$

*Spiniferites alaskensis* Marret *et al.* 2001  
topotype

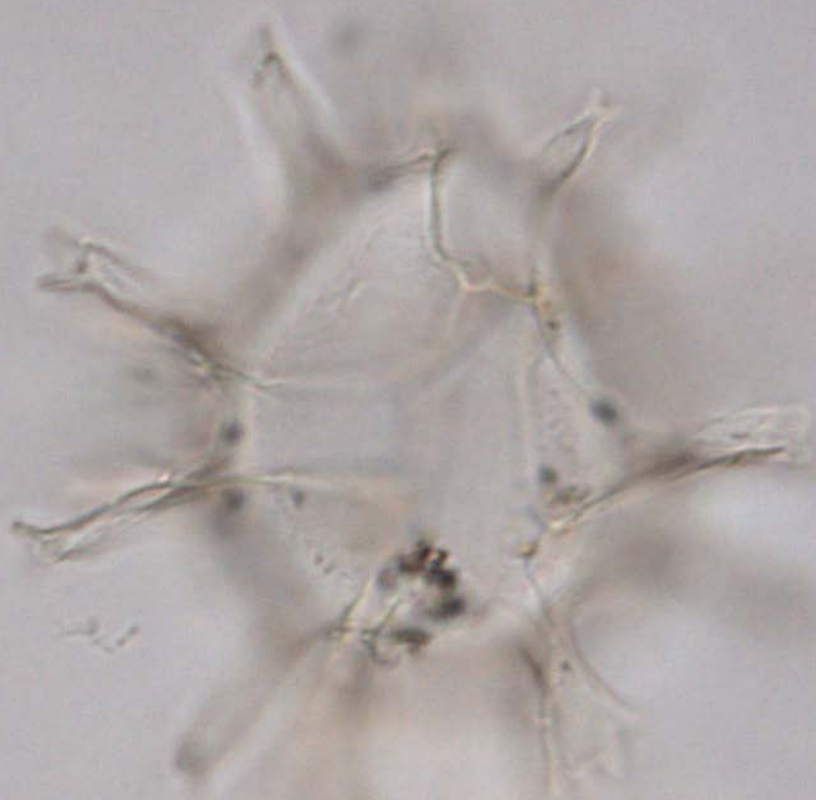

20  $\mu\text{m}$

*Spiniferites alaskensis* Marret *et al.* 2001  
topotype

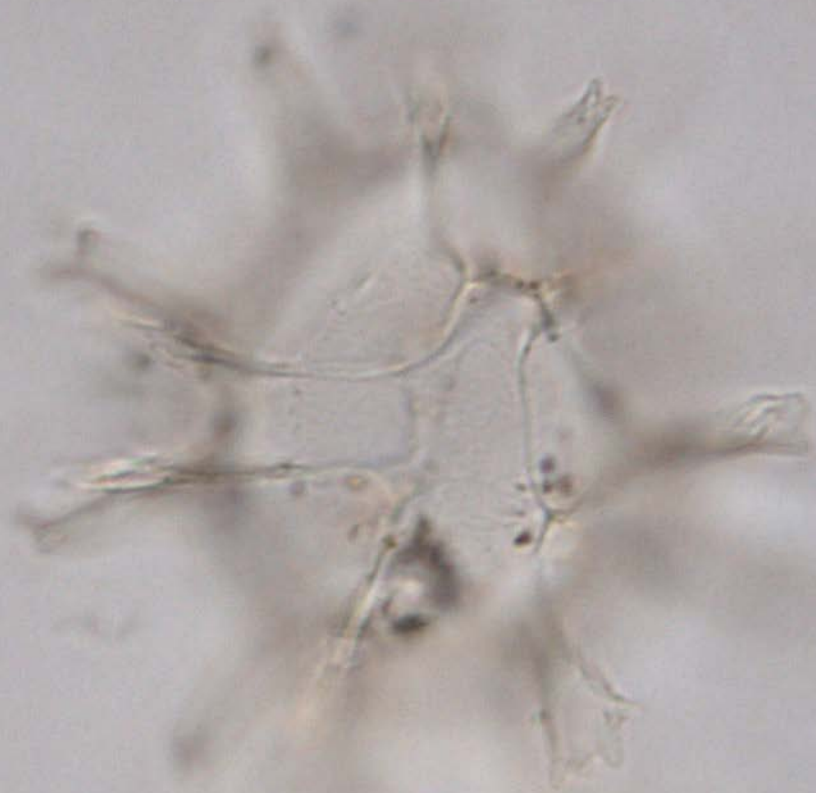

20  $\mu\text{m}$

*Spiniferites alaskensis* Marret et al. 2001  
topotype



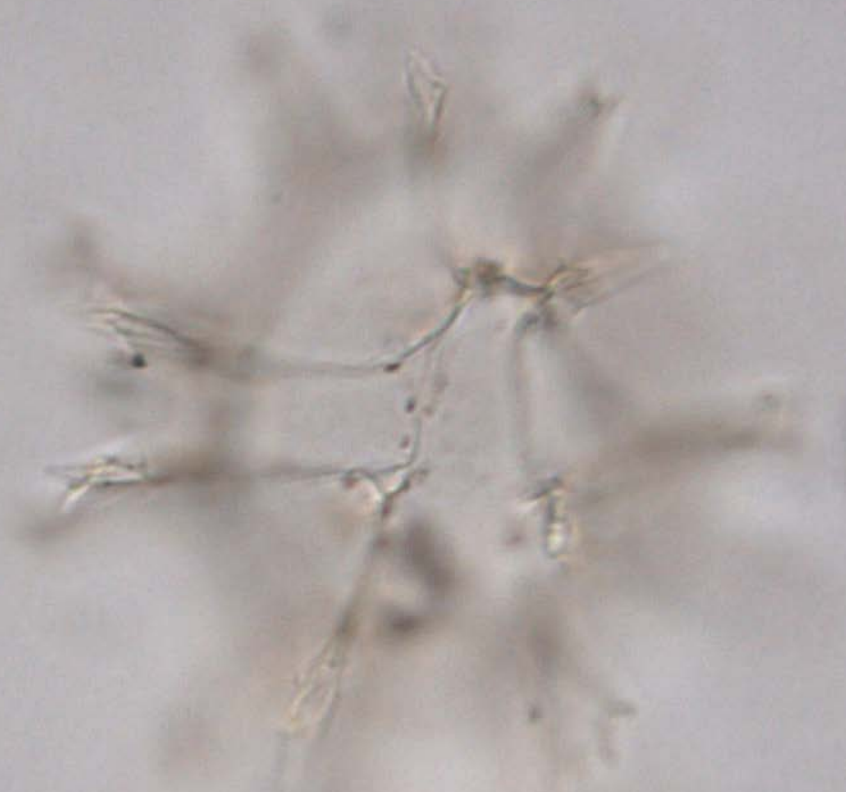

20  $\mu\text{m}$

*Spiniferites alaskensis* Marret et al. 2001  
topotype

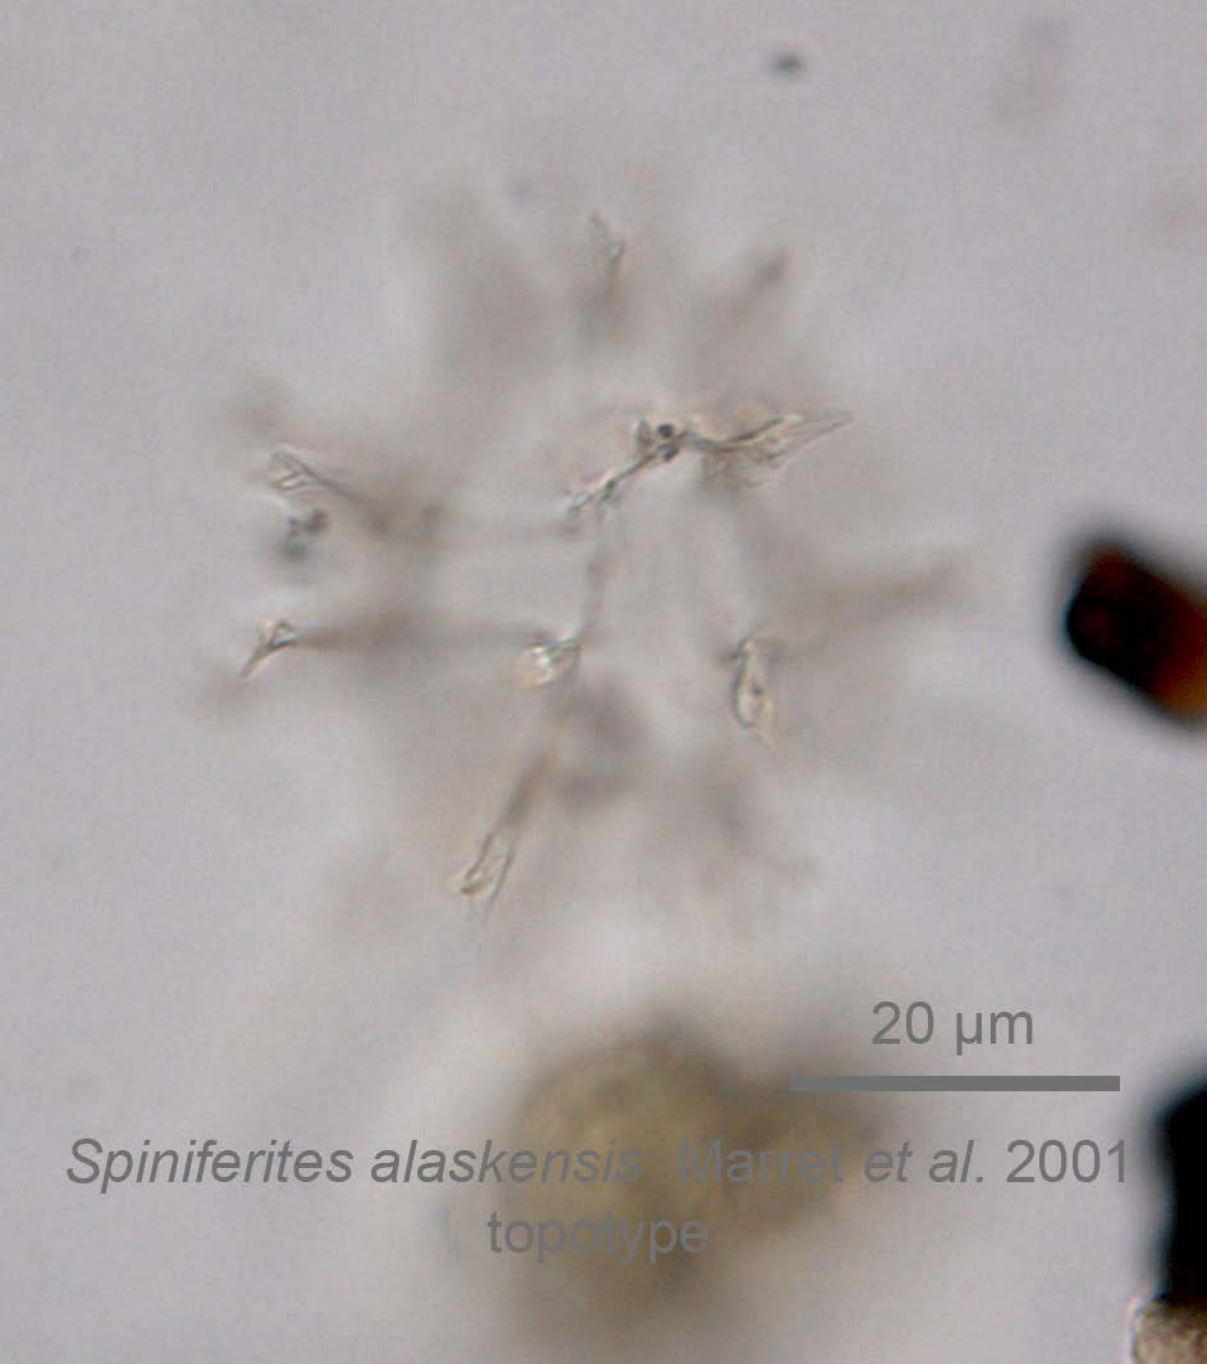

20  $\mu\text{m}$

*Spiniferites alaskensis* Marret et al. 2001  
topotype

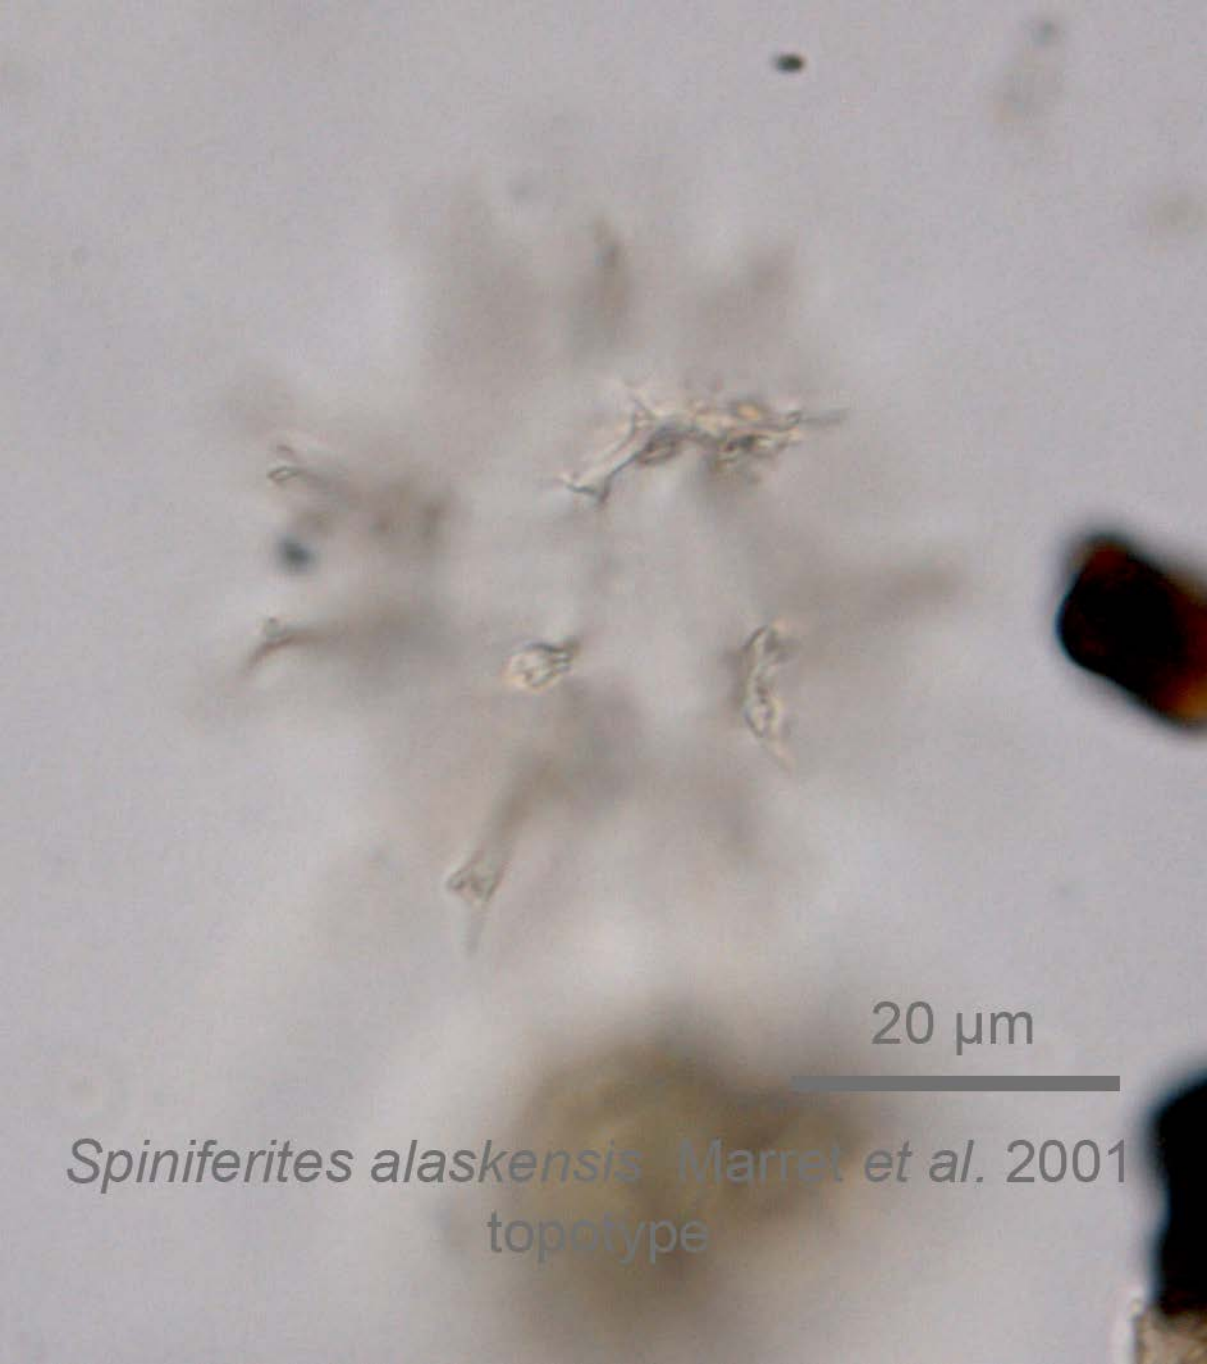

20  $\mu\text{m}$

*Spiniferites alaskensis* Marret et al. 2001  
topotype

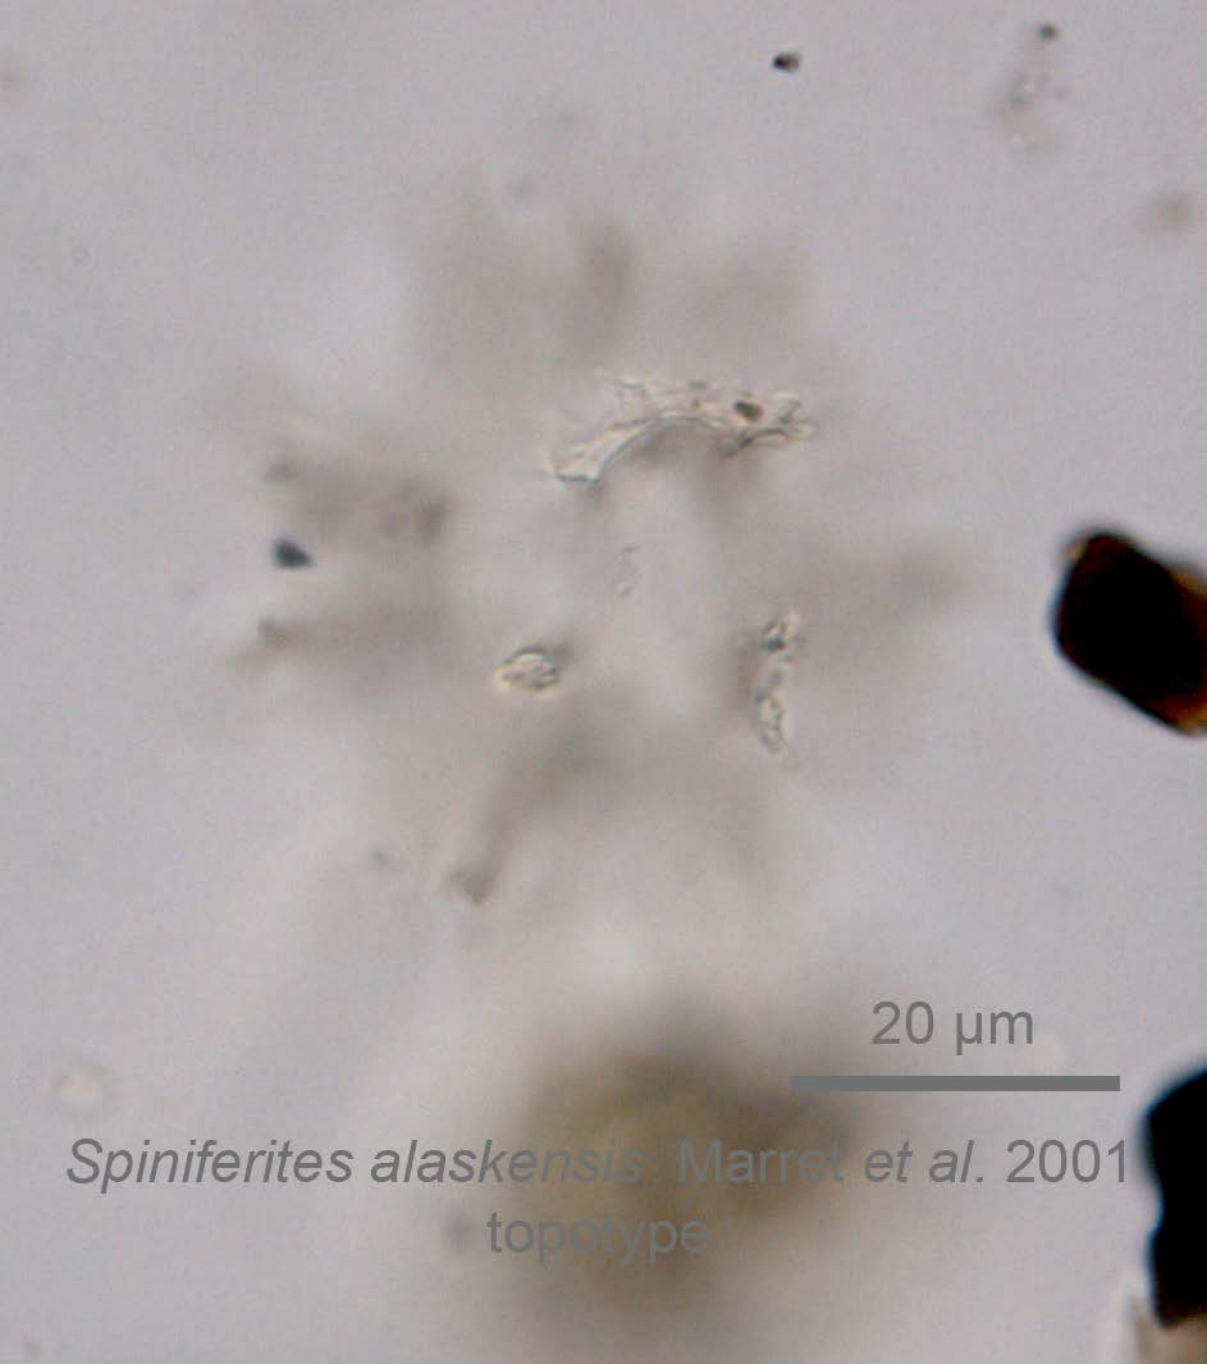

20 μm

*Spiniferites alaskensis* Marret et al. 2001  
topotype

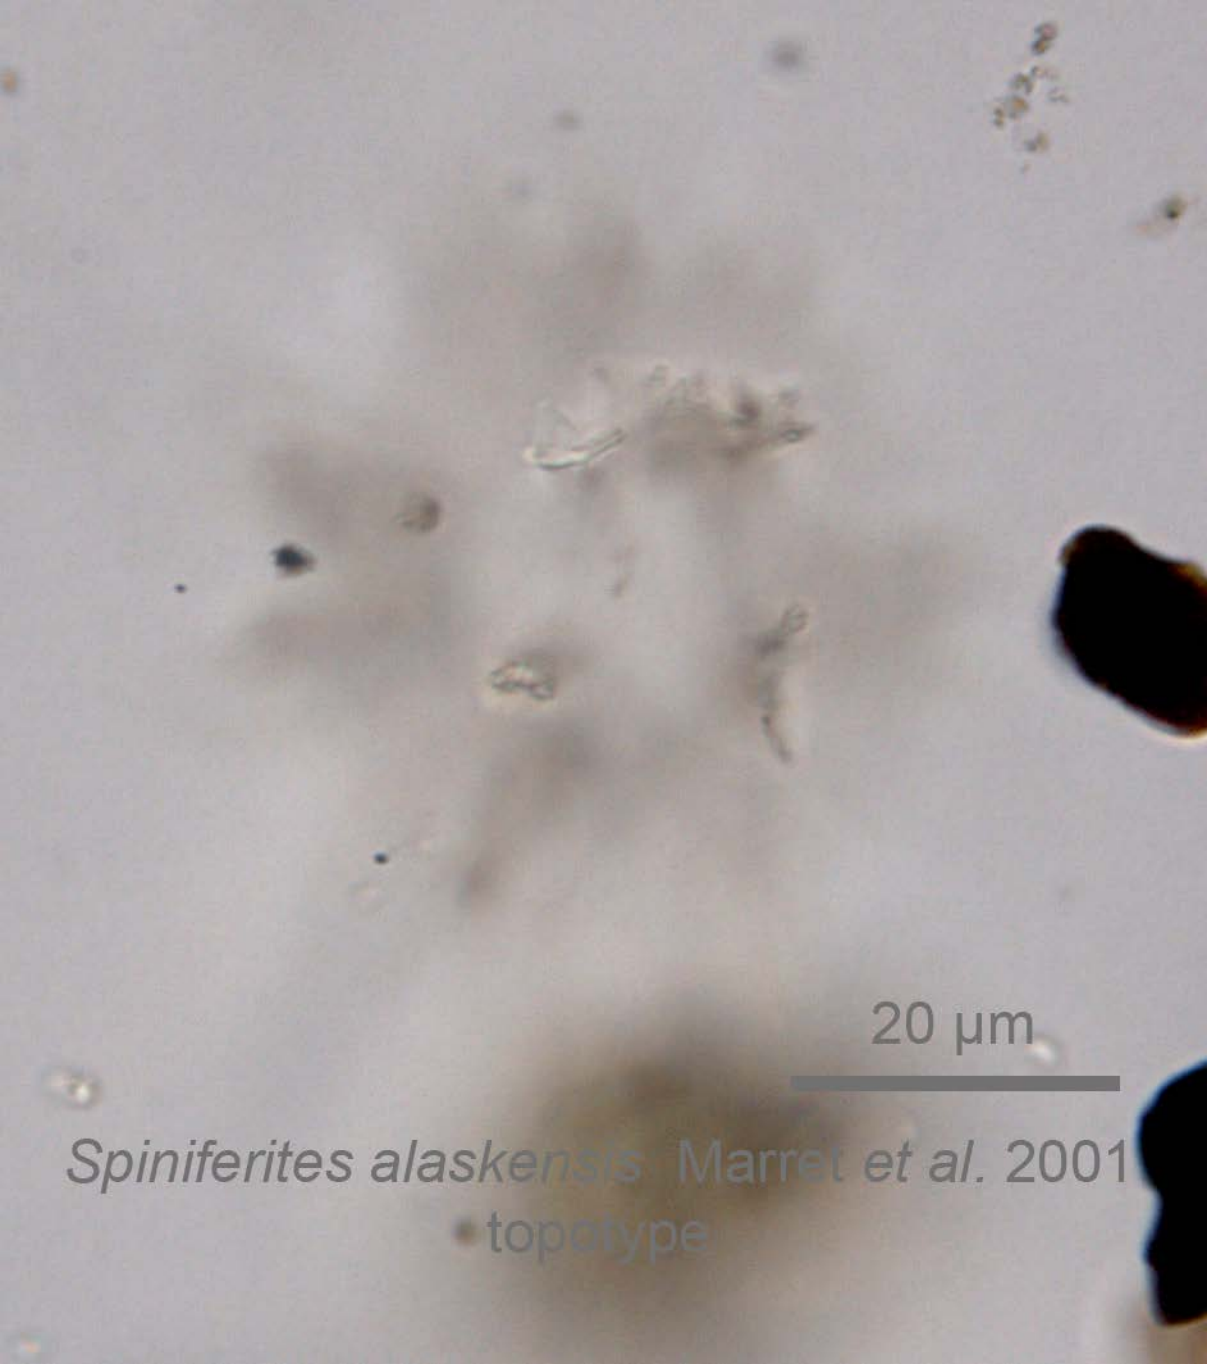

20  $\mu\text{m}$

*Spiniferites alaskensis* Marret et al. 2001  
• topotype
