# Supplementary material
Source: publisher figshare collection journal article supplement (https://tandf.figshare.com/articles/dataset/_/7466618)

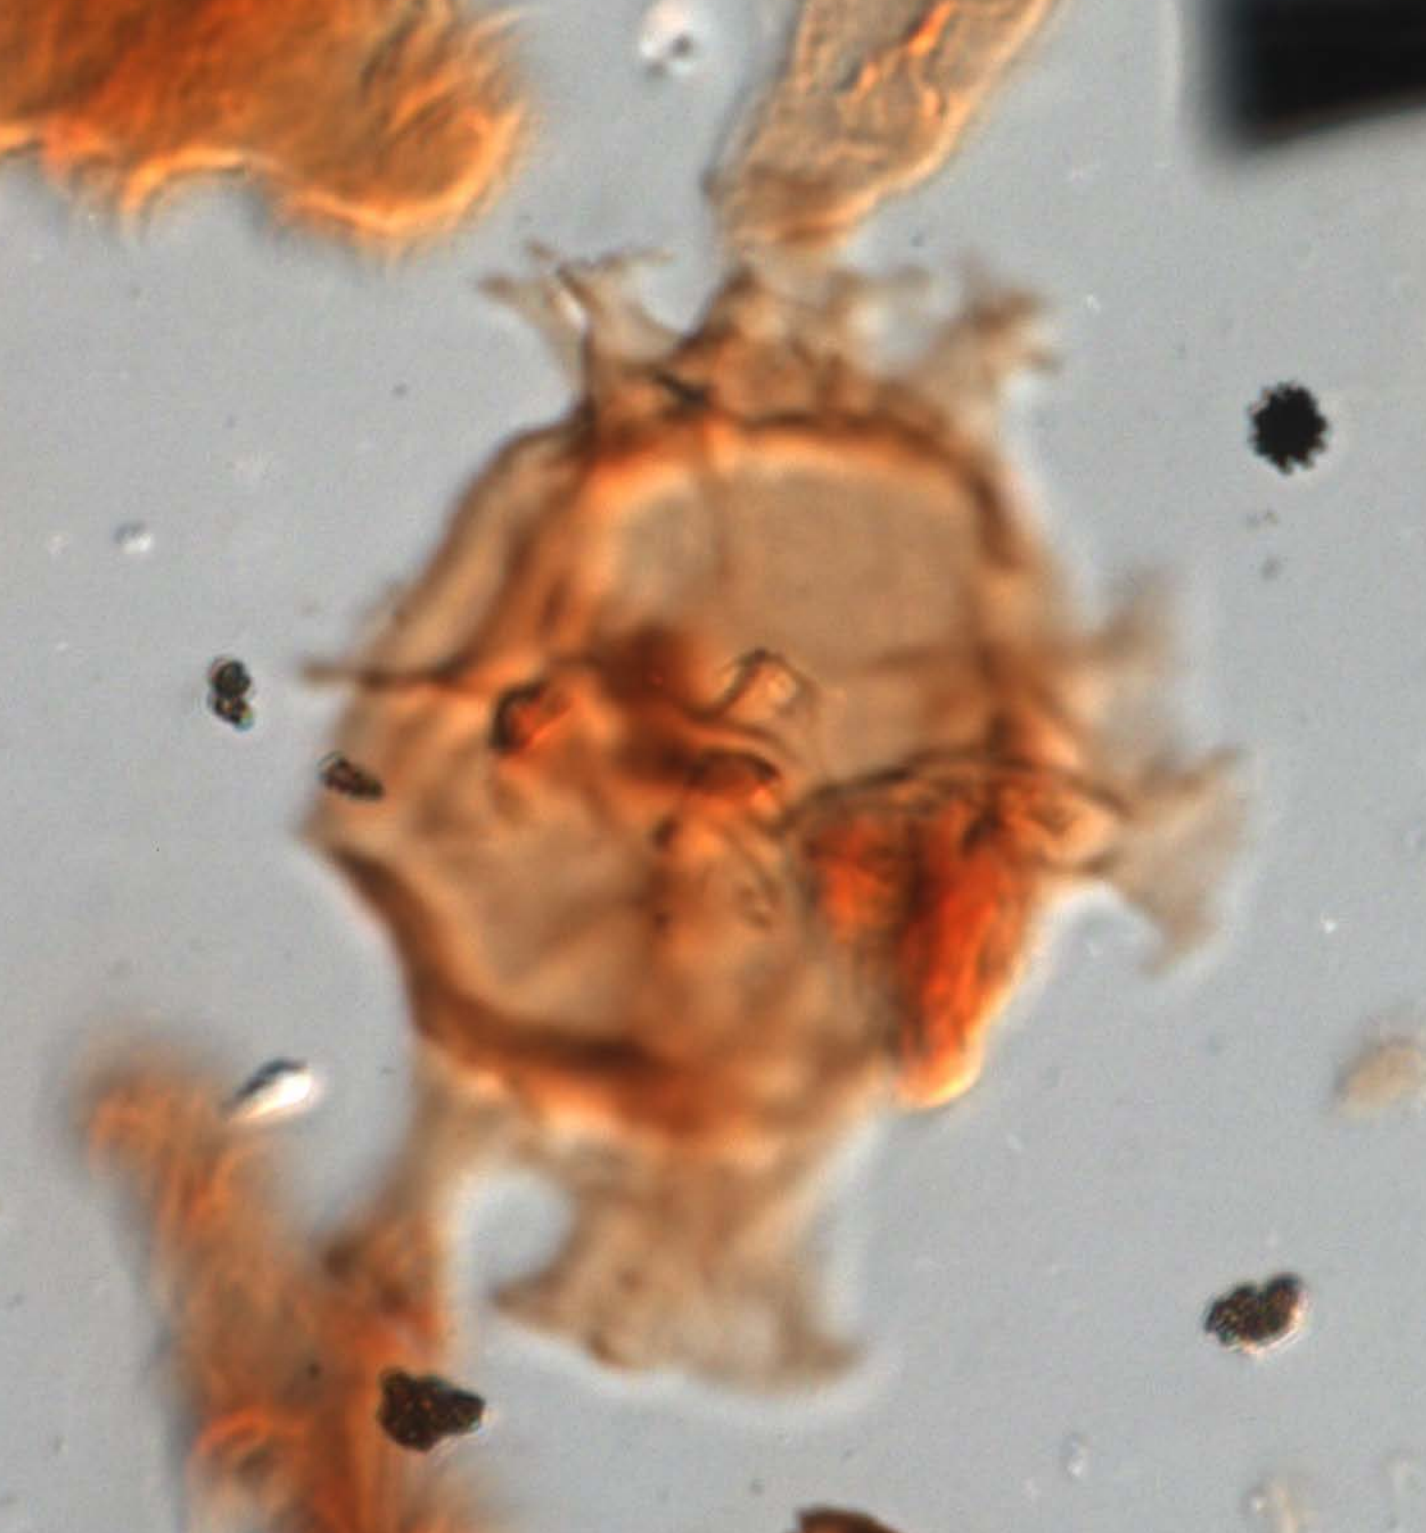

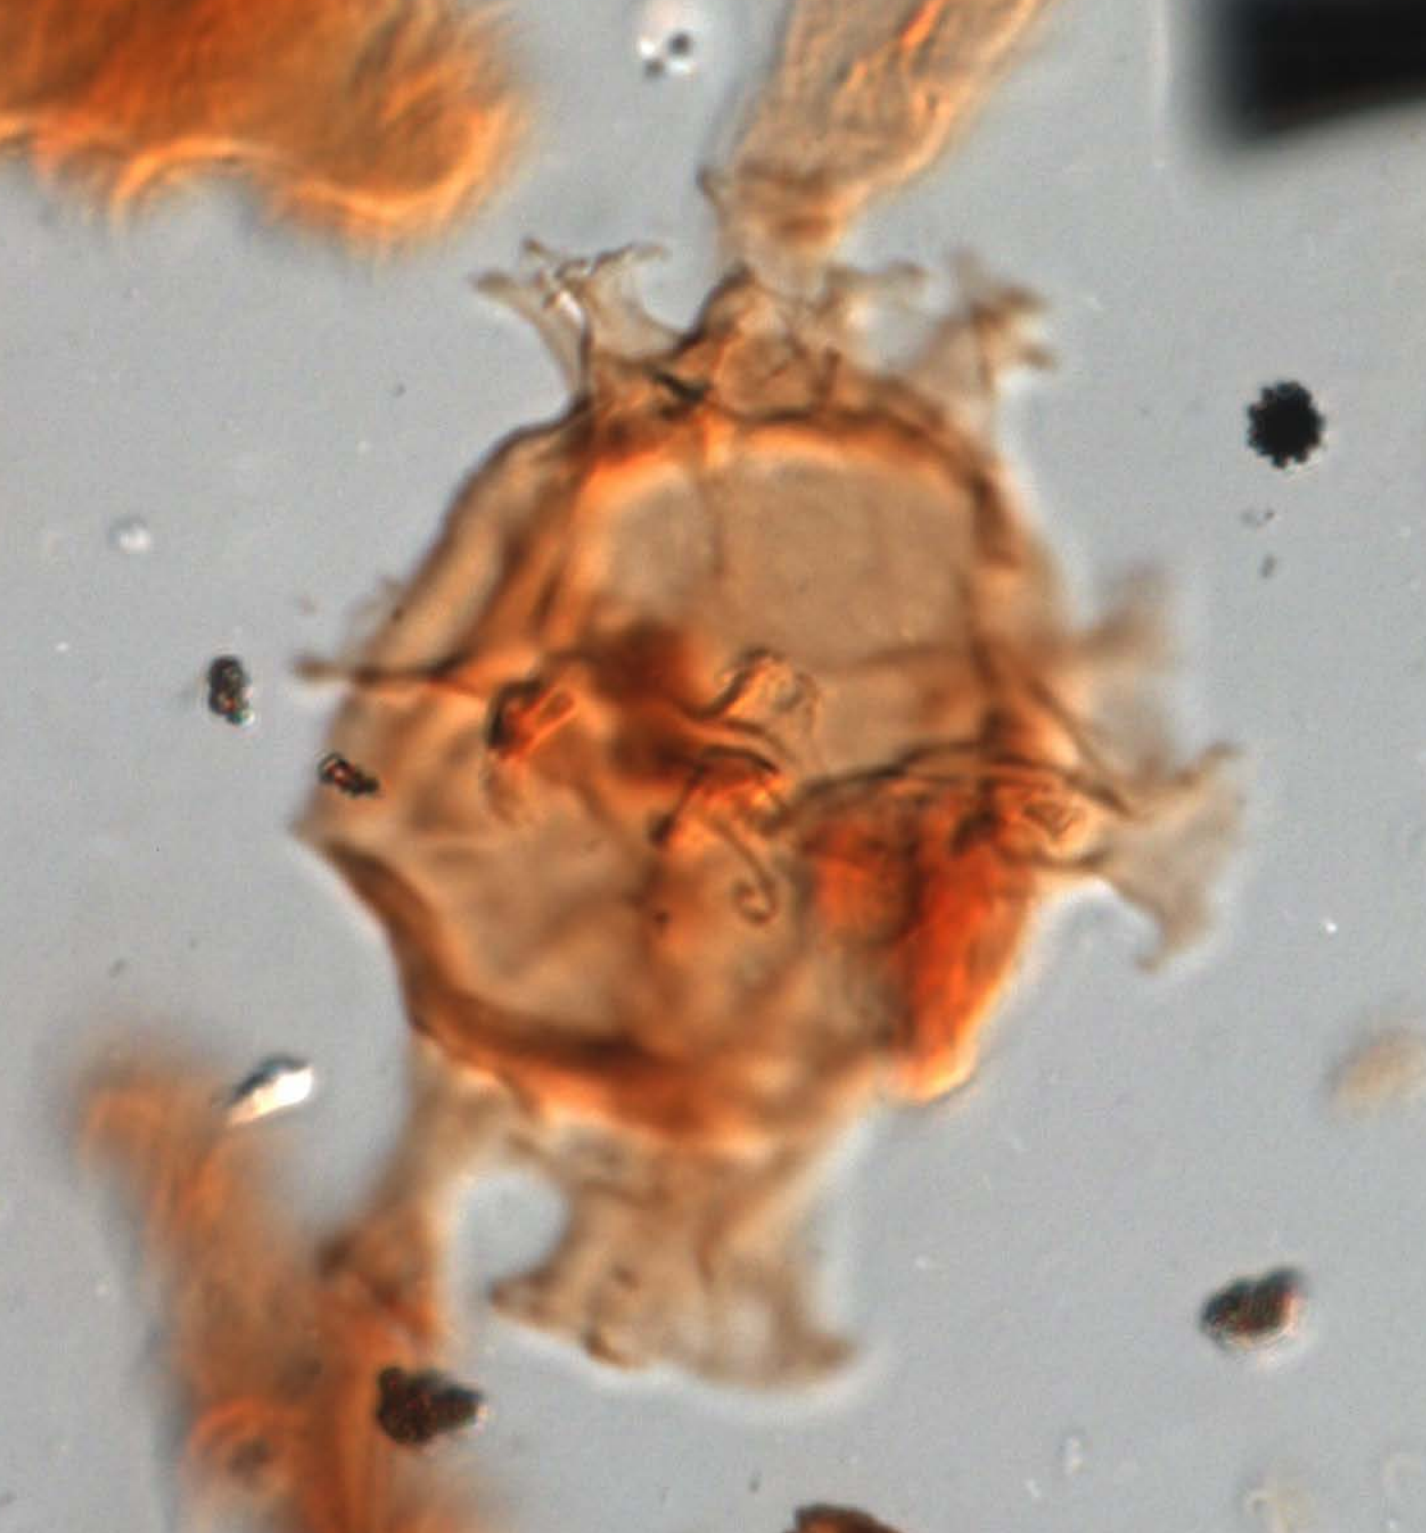

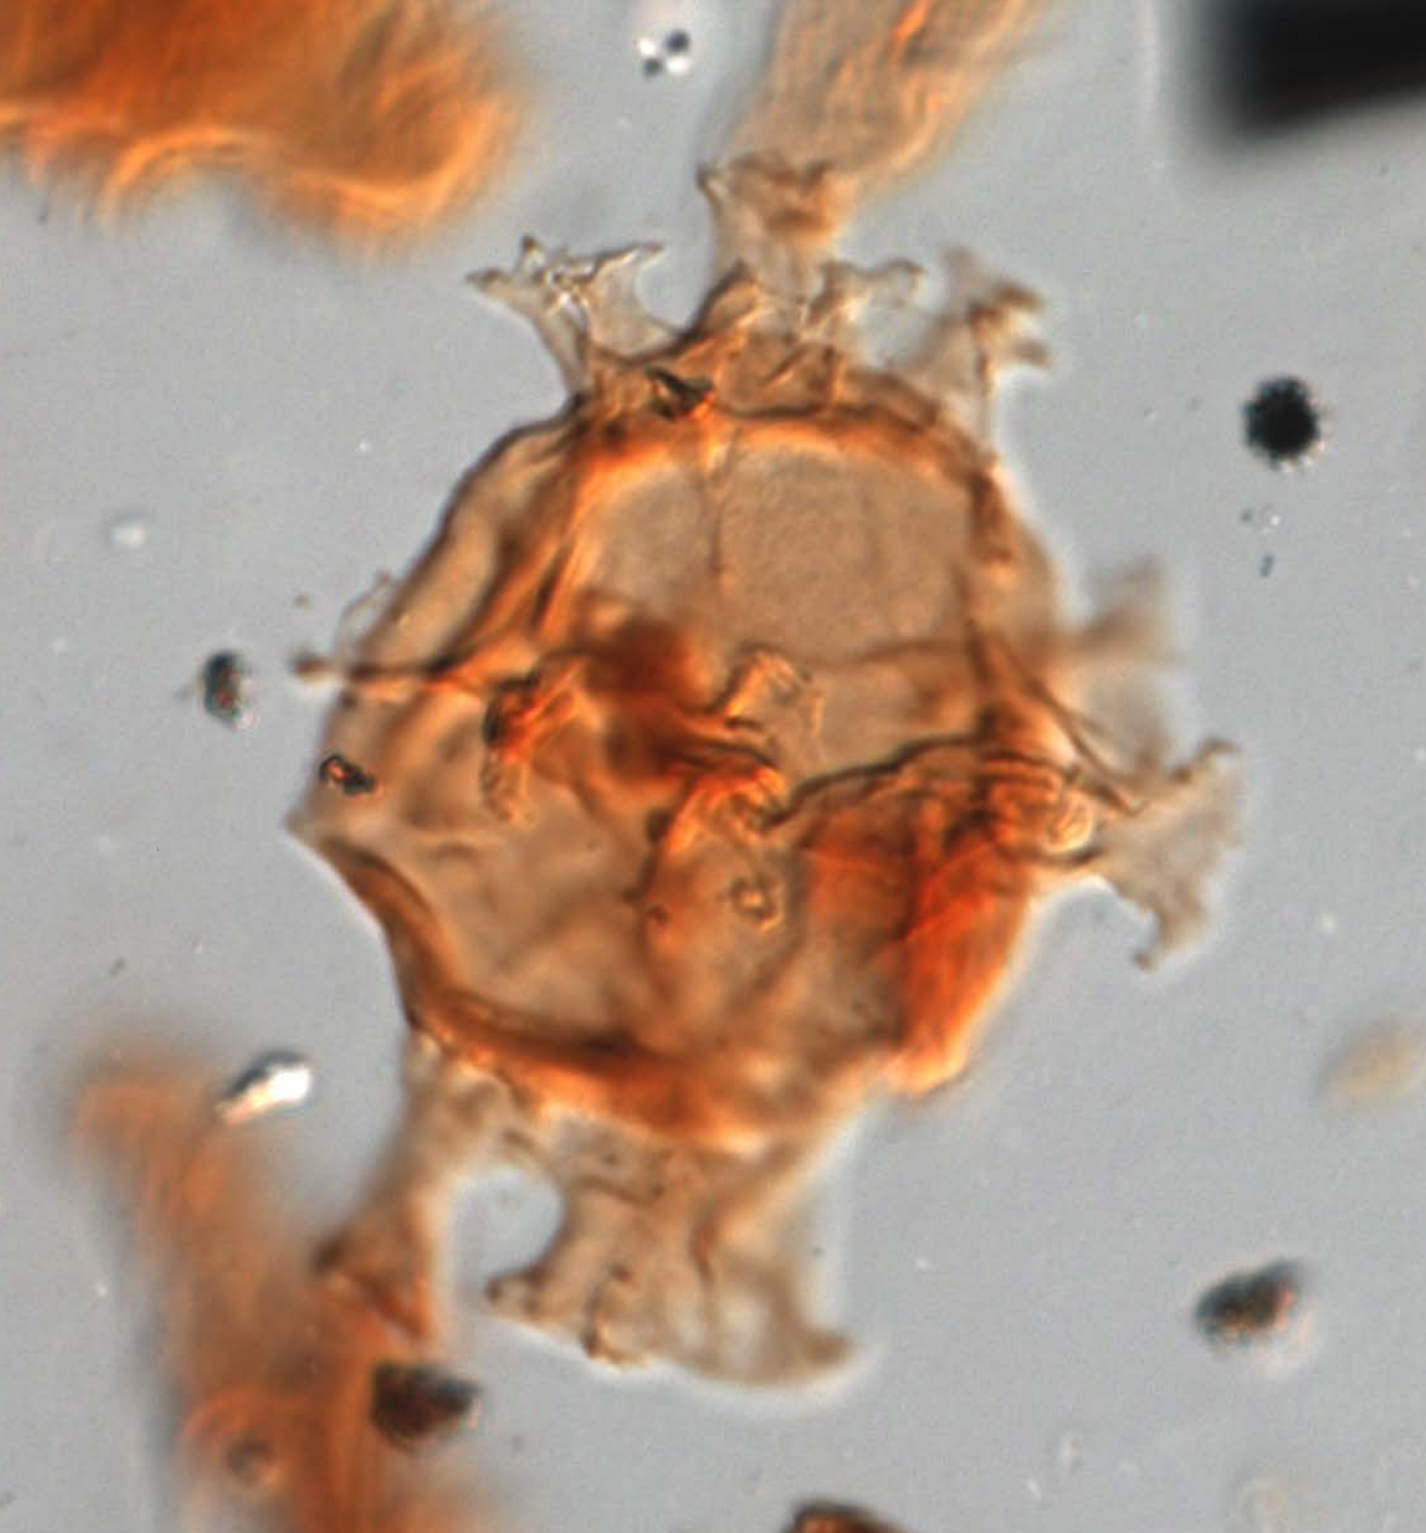



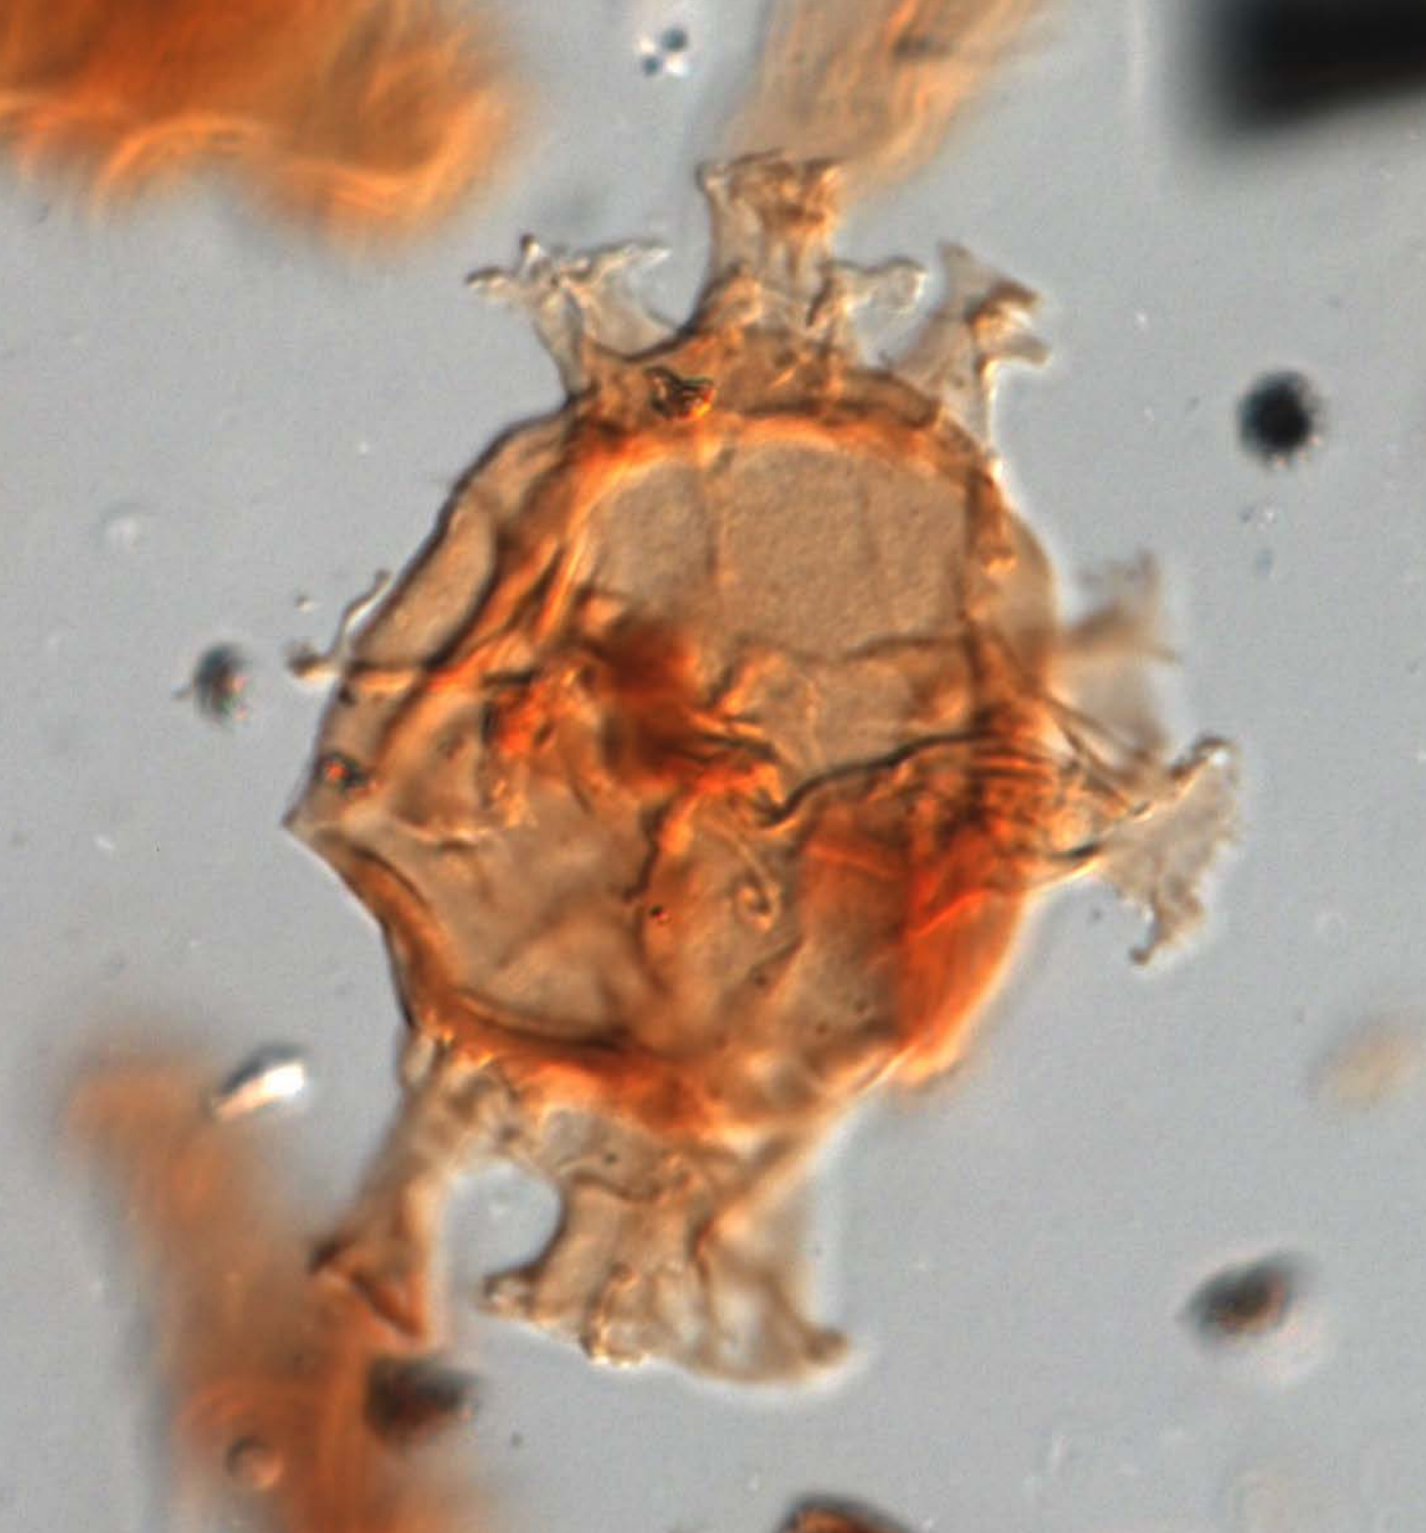

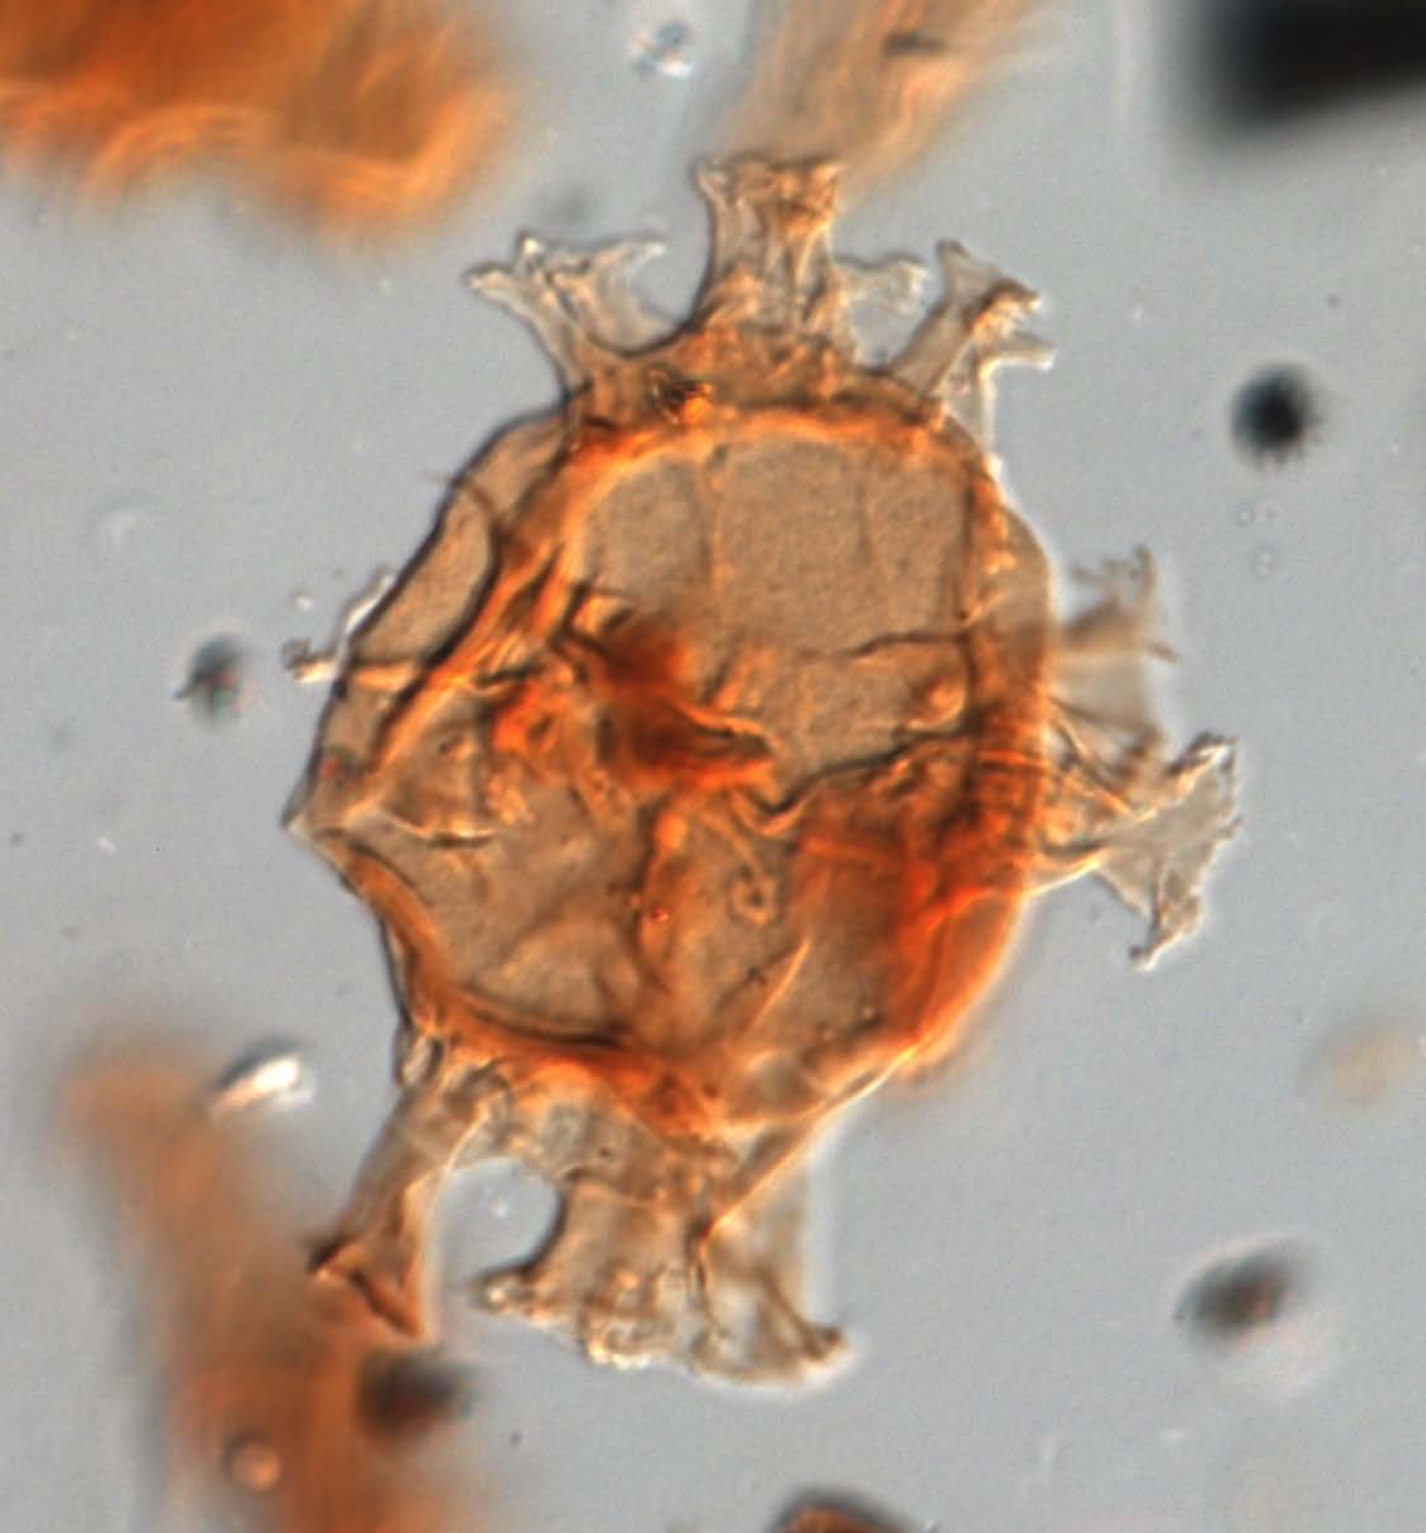



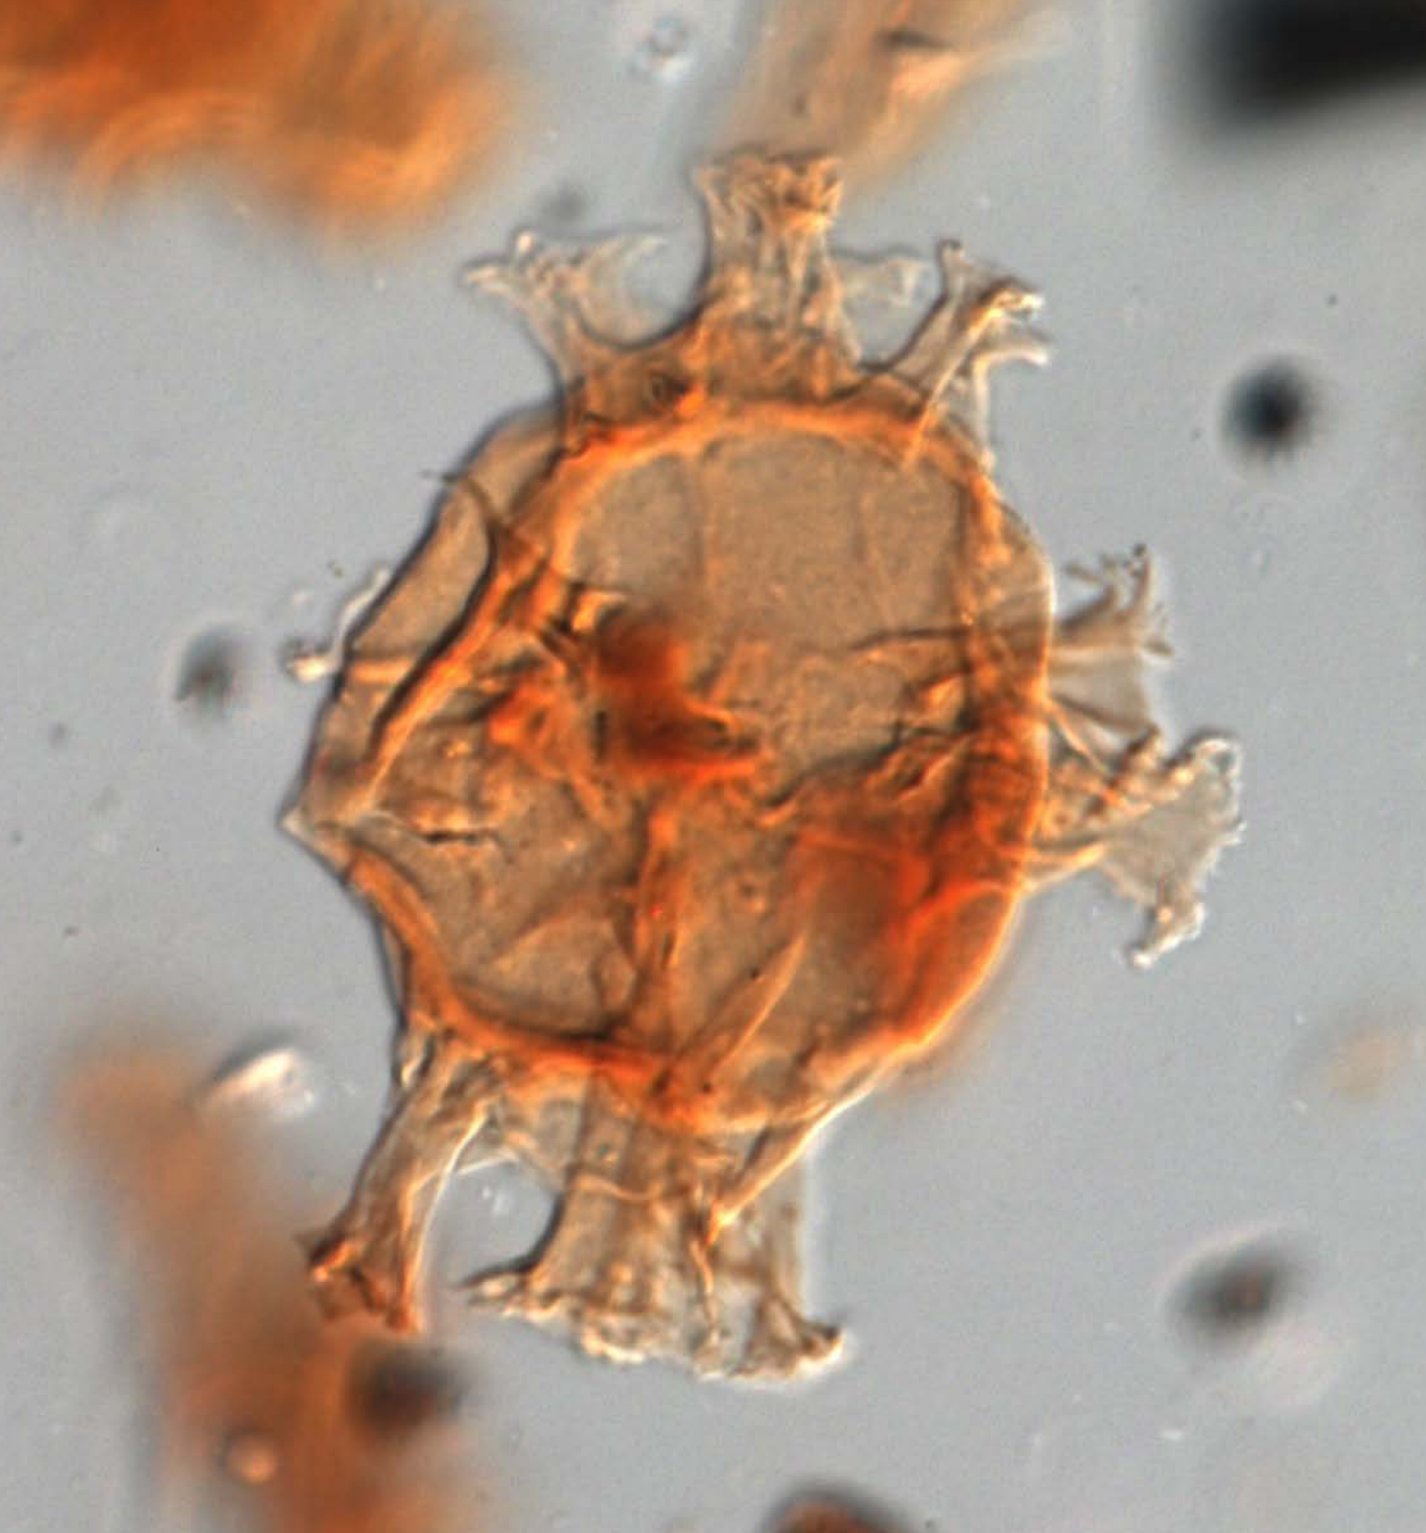

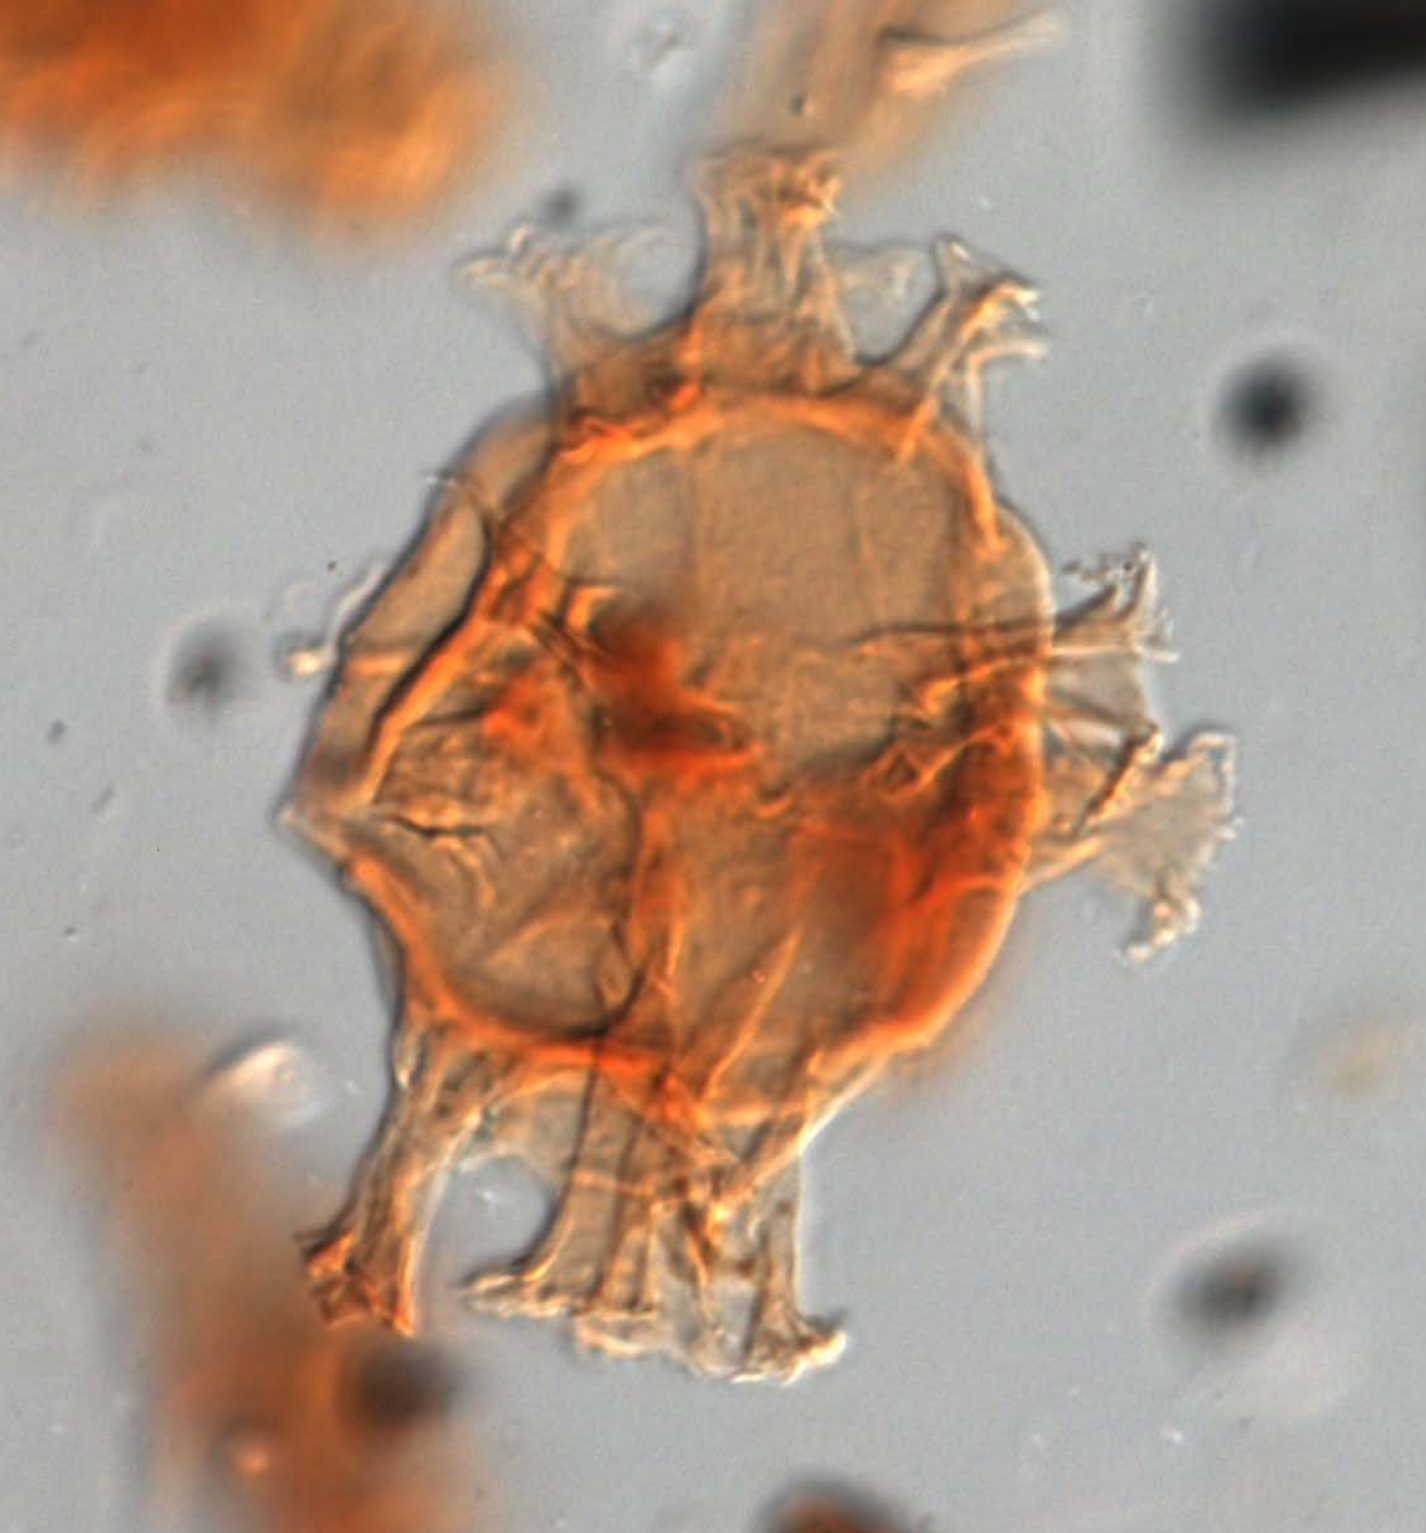



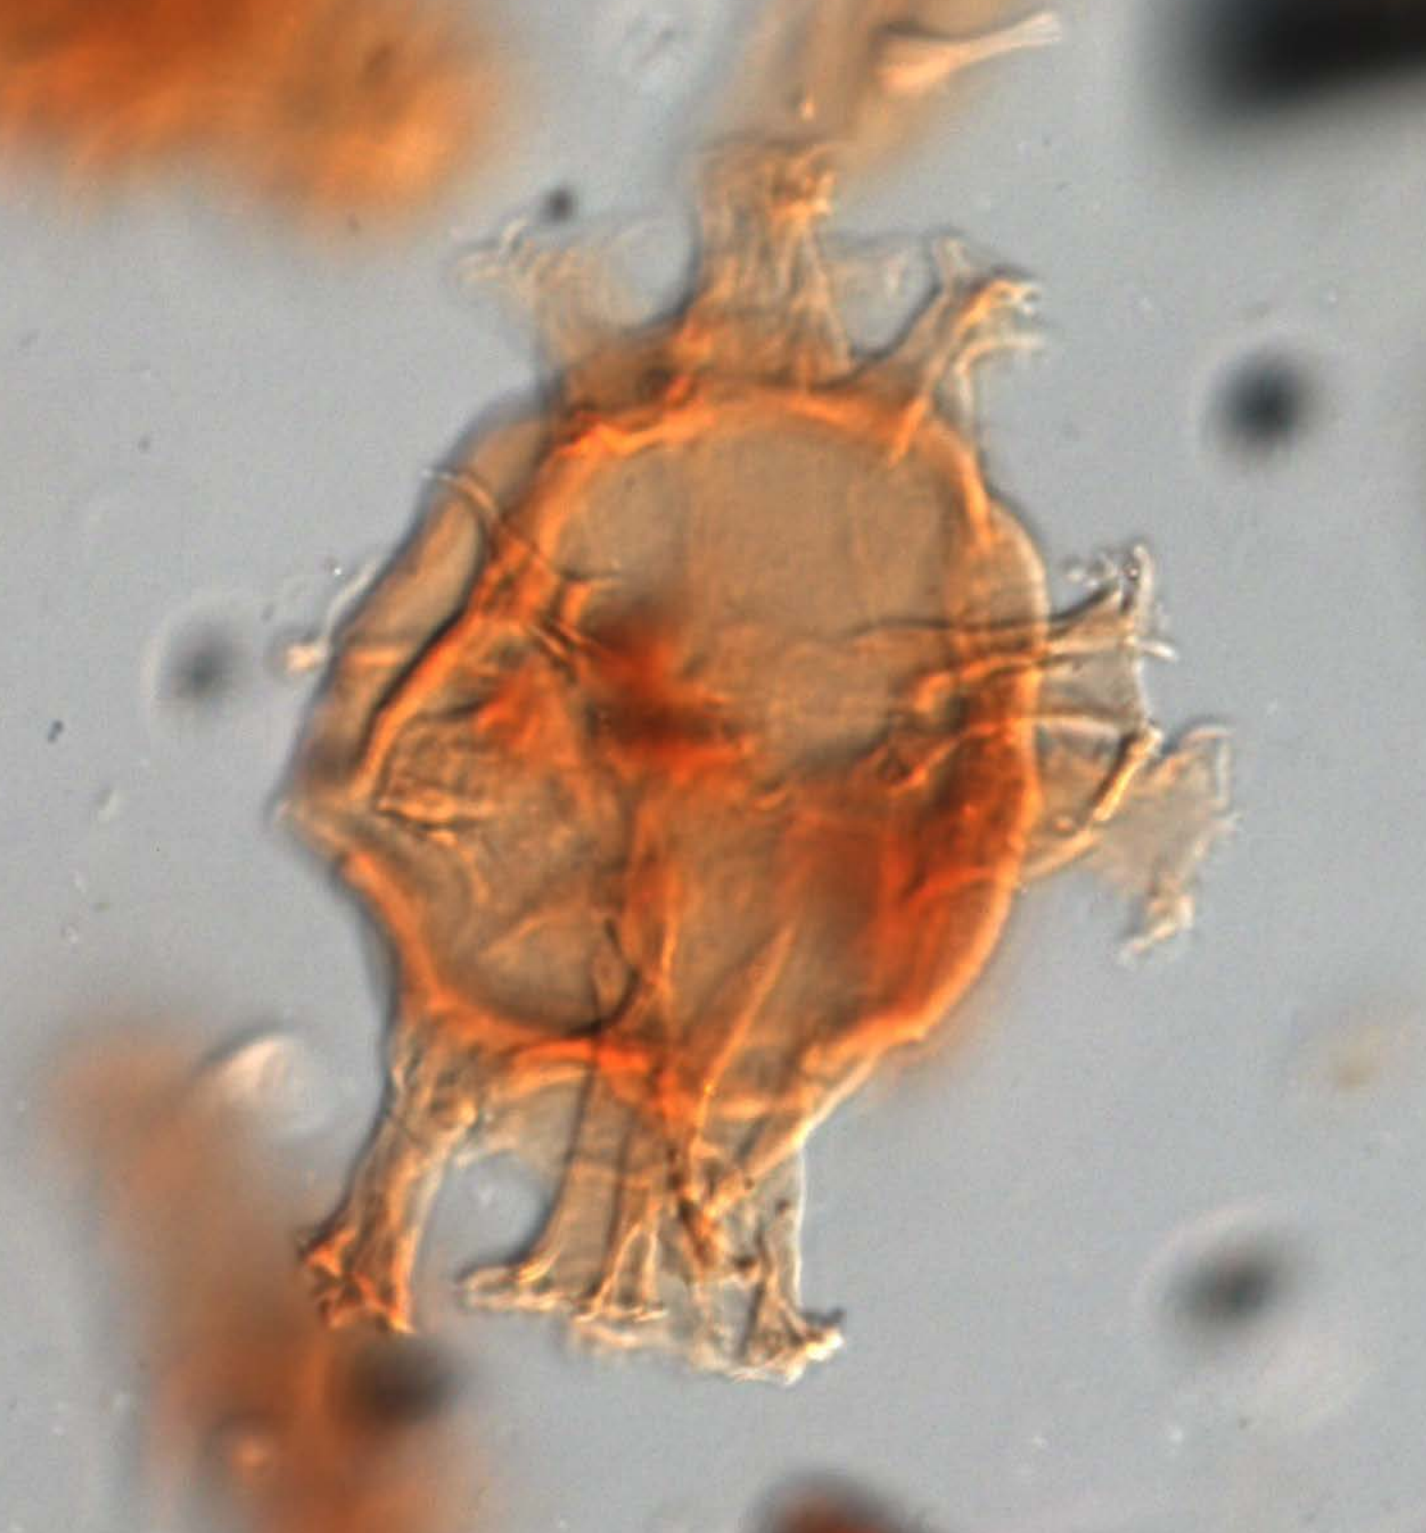



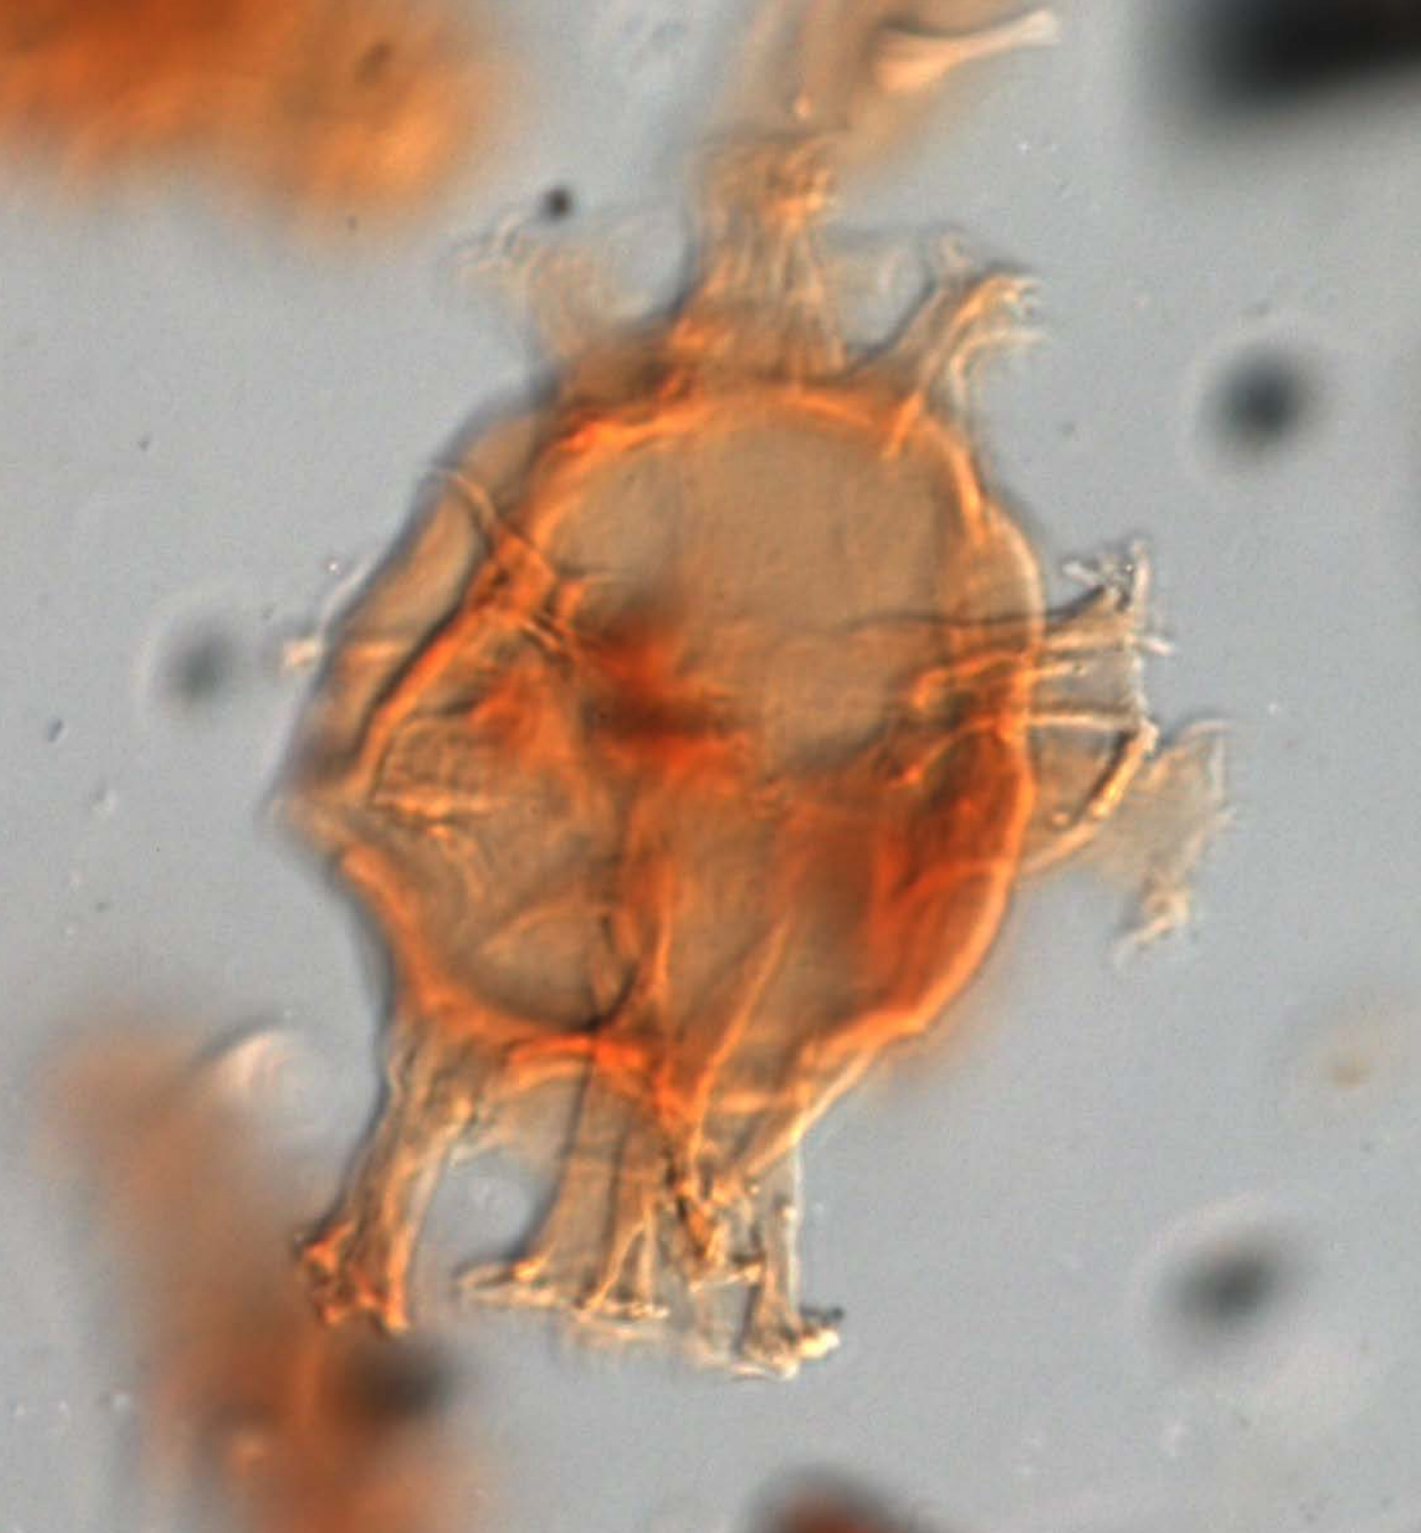

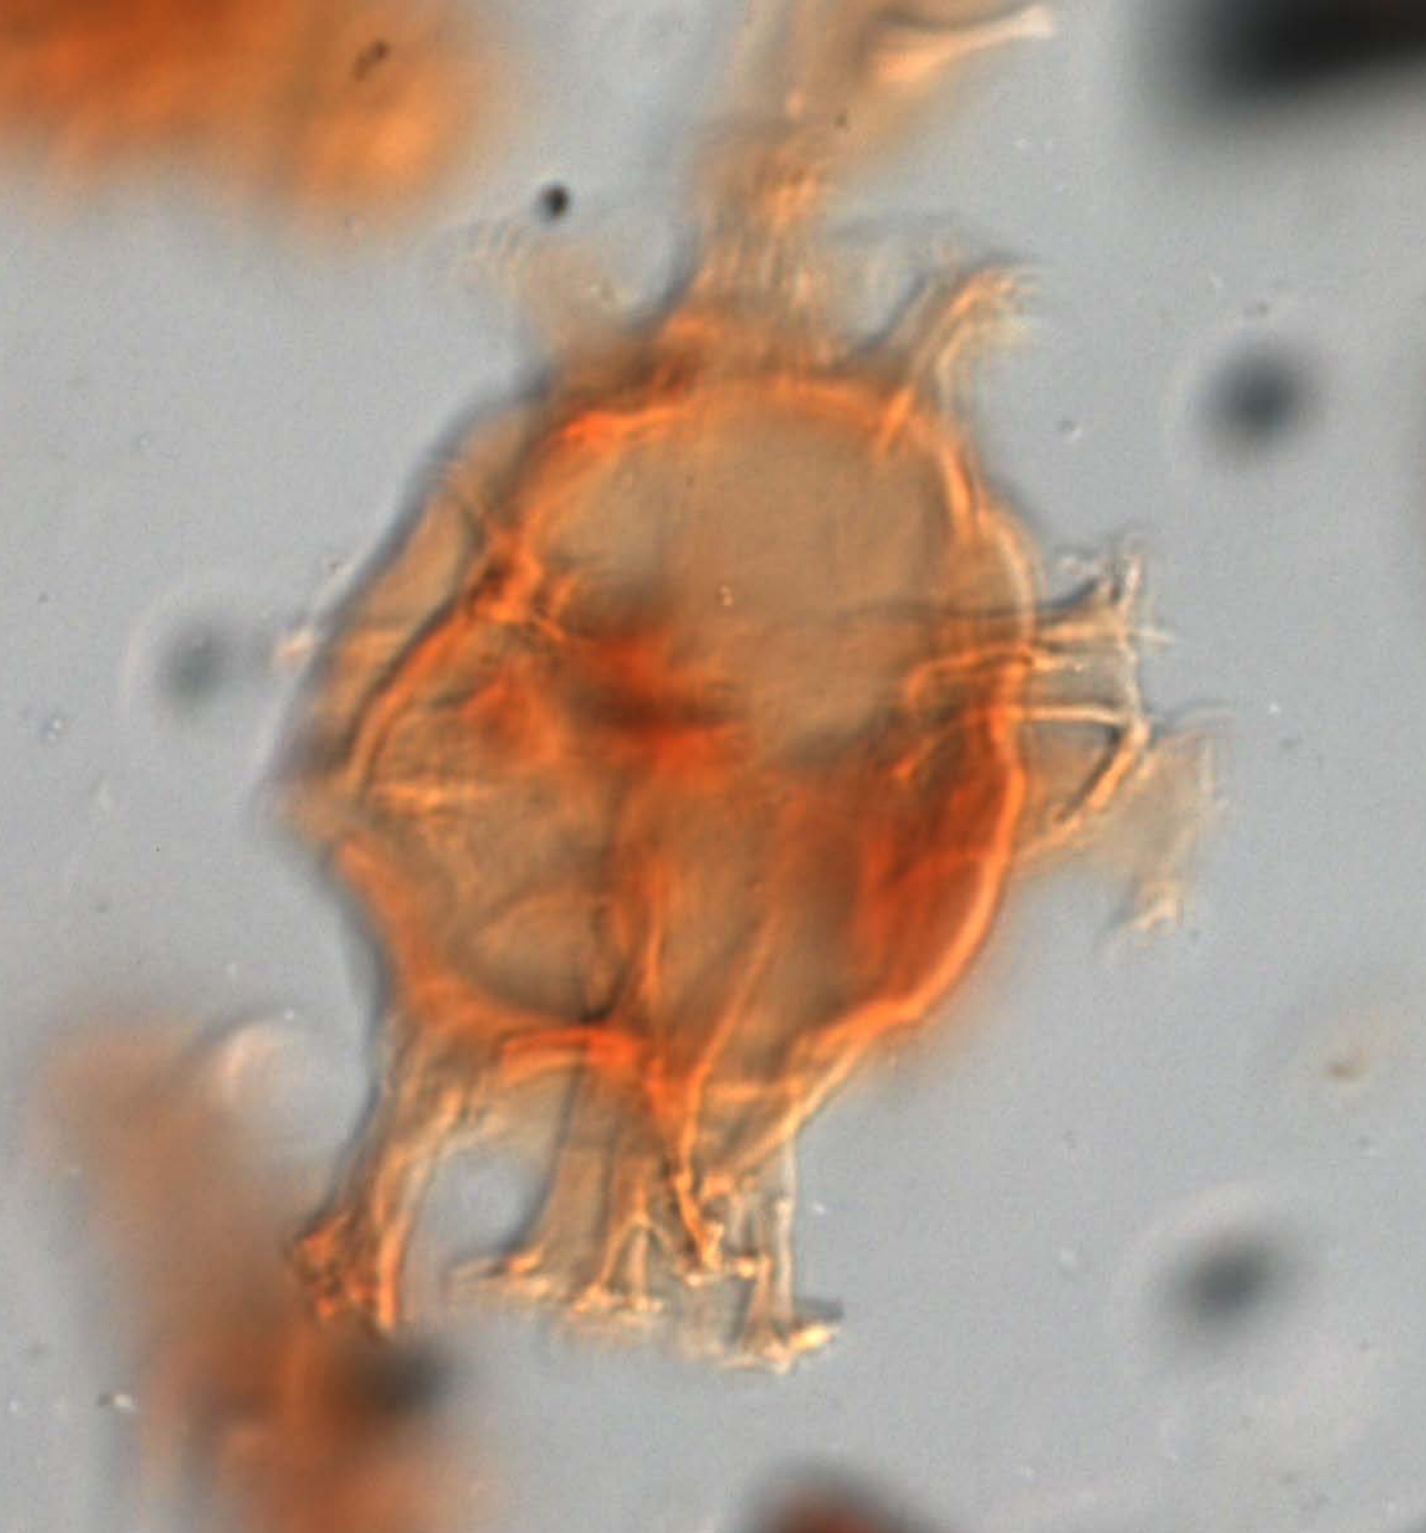

Supplement: Supplementary file 18 [file 1]
